# Supplementary material for: Examining the Availability and Accessibility of Rehabilitation Services in a Rural District of South Africa: A Mixed-Methods Study
Source: MDPI journal article supplement (doi:10.3390/ijerph18094692), 2021-04-28
Supplement: s1 [file s1]

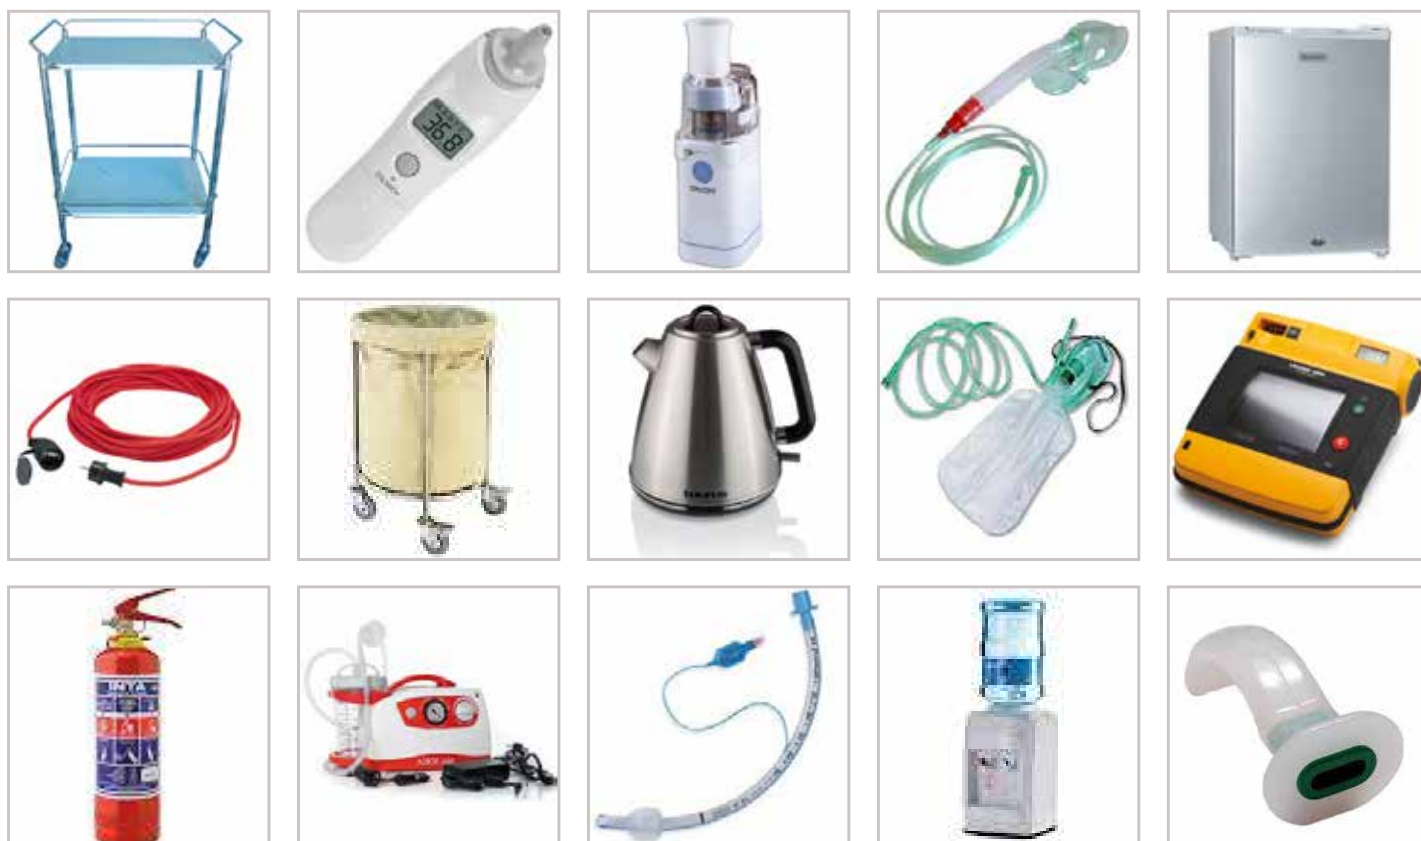

# National Health Commodities Catalogue

## for Primary Health Care Facilities

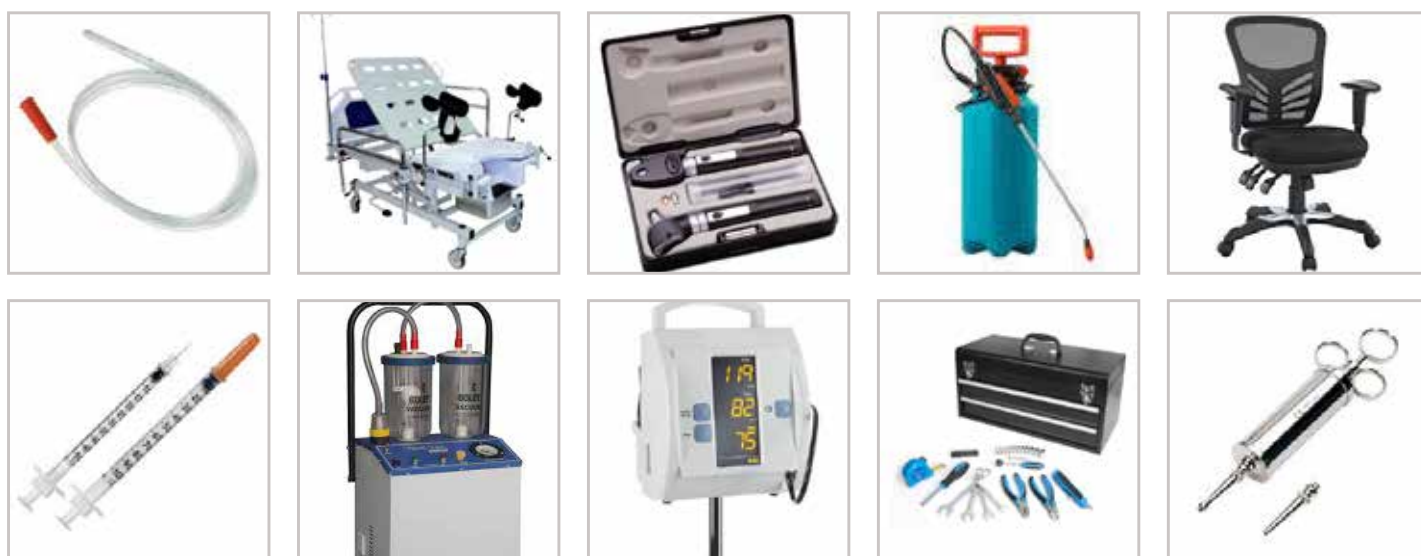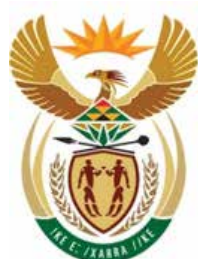

**health**

Department:  
Health  
REPUBLIC OF SOUTH AFRICA

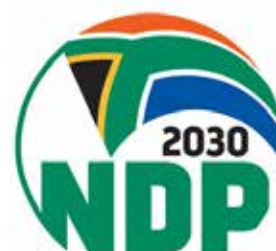

## **Disclaimer**

- i While every effort has been exercised to ensure that no copyright has been infringed by the use of curated images in this document, copyright of Internet images cannot always be established. Any such infringement is unintentional, and the image will be removed if the Department is contacted: [idealclinic@health.gov.za](mailto:idealclinic@health.gov.za).
- ii No claim is made that the images are true representations of the exact items available on Transversal Contracts. Where such images have been made available, they have been included, to assist recognition of delivered products by end-users. Should the physical appearance of any item change after a subsequent Transversal Contract, the image will be updated in the next edition of this catalogue.
- iii Any procurement of items in this catalogue will follow the prescripts of the Public Finance Management Act. Any brand-specific physical features portrayed in the images, are co-incidental, and are not an indication of any preference towards any brand or supplier.
- iv The continuation of this project and production of this material were made possible by the support of the American People through the U.S. Agency for International Development (USAID) under the Cooperative Agreement No. AID-674-A-12-00016, awarded to BroadReach. The contents are the responsibility of the South African National Department of Health and do not necessarily reflect the views of USAID or the United States Government.

# **National Health Commodities Catalogue** for Primary Health Care Facilities

# acknowledgement

The objectives of PHC can be summed up as the promotion of wellness, prevention of disease, early detection of disease, and effective treatment at the appropriate level of care. The success of the PHC facility to contribute to an improvement in health outcomes is premised on the following three pillars:

- **People** who are motivated, capacitated, empowered, supported, and inspired to serve
- **Processes** that are rational, unambiguous, understandable and clearly enunciated in policies, protocols and guidelines
- **Platform** that includes infrastructure, equipment, medicines, and consumables

This document was produced through the implementation of accepted techniques of quality improvement and standardisation (Operation Phakisa). After an assessment of the existing challenges, the Ideal Clinic, was developed as an umbrella standard with a concurrent plan to achieve that umbrella standard. This includes the standardisation of the quality and minimum quantities of commodities (equipment, instruments, consumables and furniture) in PHC facilities.

The completion of this catalogue was led by Ms Jeanette Hunter and Mr Ramphelane Morewane. Dr Sibusiso Zuma (FH360) did a sterling job of developing this document to final draft stage. Dr Shaidah Asmall did the final review and relevant improvements.

The procurement of commodities has been universally identified as a major obstacle to achieving Ideal Clinic status. Poorly equipped facilities without the necessary consumables are not conducive to the delivery of quality health care. Thus, this Health Commodities Catalogue serves as a tool to assist PHC Facilities in achieving Ideal Clinic status, by specifying:

- The right equipment and consumables required for the specific service needs
- Minimum quality criteria and durability standards
- Adequate quantities required to permit efficient clinical activity

This catalogue is intended to be a dynamic document that will be reviewed and amended regularly to ensure that it meets changing demands within the health sector and to ensure consistent availability of essential equipment and consumables in PHC facilities.

My sincere appreciation to the following officials who were part of the National Specification and Catalogue Committee:

|                       |                       |                                 |                      |
|-----------------------|-----------------------|---------------------------------|----------------------|
| Dr S Abizu NWDOH      | Mr F Gebrehemin ECDOH | Ms N Maphumulo KZND OH          | Ms N Ndlovu MPDOH    |
| Dr D Abrahams GDOH    | Dr T Gustav KZND OH   | Ms ME Mashao LPDOH              | Dr N Ndwamanto LPDOH |
| Dr S Asmall           | Mr R Hussey NDOH      | Ms D Matenche National Treasury | Ms D Nkosi MPDOH     |
| Mr S Bakhane NDOH     | Mr S Khosa NDOH       | Mr MJ Mathobisa FSDOH           | Ms P Ntamane GDOH    |
| Mr D Baloyi LPDOH     | Mr B Khoza NDOH       | Ms E Mere NWDOH                 | Ms A Railoun NDOH    |
| Ms M Boikanyo NWDOH   | Ms H Langa KZND OH    | Ms Z Mnukwana ECDOH             | Mr S Rakubu Aurum    |
| Ms M Bok NDOH         | Mr R Mabope NDOH      | Ms Y Mokgalagadi NDOH           | Mr D Selby GDOH      |
| Mr C Clarence KZND OH | Ms V Mabunda LPDOH    | Ms O Mokgatlhe NDOH             | Ms O Simango LPDOH   |
| Ms M Dichaba NDOH     | Ms L Madikizela NDOH  | Mr M Morabe NDOH                | Ms D Tshabalala NDOH |
| Ms M Eckard NCDOH     | Mr K Mahlako NDOH     | Mr R Morewane NDOH              | Dr S Zuma FHI360     |
| Ms I da Gama GDOH     | Ms M Makgotlho GDOH   | Ms N Mpama NDOH                 |                      |

Thank you to our partner organisations USAID, CDC and the European Union who supported the development of this catalogue.

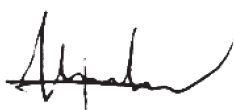

**Ms. M P Matsoso**  
Director-General: Health  
14 May 2018

# table of contents

|                                                      |    |
|------------------------------------------------------|----|
| LIST OF ABBREVIATIONS                                | 6  |
| LIST OF ACRONYMS                                     | 7  |
| INTRODUCTION                                         | 10 |
| EXAMPLE OF ITEM PAGE LAYOUT                          | 13 |
| EXAMPLE OF INSTRUMENTS<br>SPECIFICATIONS PAGE LAYOUT | 14 |
| EXAMPLE OF CONSUMABLES ITEM PAGE LAYOUT              | 15 |
| EXAMPLE OF TECHNICAL SPECIFICATIONS PAGE LAYOUT      | 16 |

## A. Equipment 17

|                                           |     |
|-------------------------------------------|-----|
| CLINICAL                                  | 17  |
| Diagnostic                                | 18  |
| Essential                                 | 39  |
| Specialised                               | 46  |
| <i>Resuscitation</i>                      | 46  |
| <i>Point of Care Testing</i>              | 61  |
| <i>Sterilisation</i>                      | 63  |
| <i>Oral Health</i>                        | 67  |
| <i>Rehabilitation</i>                     | 88  |
| GENERAL                                   | 117 |
| Building maintenance                      | 118 |
| Cleaning                                  | 123 |
| Cold chain                                | 140 |
| Fire safety                               | 144 |
| Garden                                    | 147 |
| Information and Communications Technology | 166 |
| Kitchen                                   | 167 |
| Miscellaneous                             | 172 |

## B. Instruments 181

|                |     |
|----------------|-----|
| Resuscitation  | 182 |
| Surgical       | 187 |
| Obstetric      | 200 |
| Oral health    | 206 |
| Rehabilitation | 259 |

## C. Consumables 267

|                                  |            |
|----------------------------------|------------|
| <b>CLINICAL</b>                  | <b>267</b> |
| Clinical stationery              | 268        |
| Surgical                         | 285        |
| Point of Care Testing            | 337        |
| Obstetric                        | 346        |
| Oral health                      | 348        |
| Rehabilitation                   | 375        |
| Sterilisation                    | 411        |
| Personal protection equipment    | 413        |
| <b>GENERAL</b>                   | <b>421</b> |
| Building maintenance consumables | 422        |
| Cleaning                         | 438        |
| Garden                           | 462        |
| General stationery               | 463        |
| Miscellaneous                    | 466        |

## D. Furniture & Appliances

**469**

Clinical

470

General

507

 FURNITURE &  
APPLIANCES

## E. Appendices

**537**

### INTRODUCTION TO THE TECHNICAL SPECIFICATIONS

**538**

### APPENDIX 1 : TECHNICAL SPECIFICATIONS

**541**
*Clinical equipment*

542

*General equipment*

631

*Furniture and appliances*

724

### APPENDIX 2 : IDEAL CLINIC CHECKLISTS

**797**
*Ideal clinic checklists*

798

*Ideal community health centre checklists*

824

APPENDICES

### INDEX

**879**

# list of abbreviations

|                          |                        |
|--------------------------|------------------------|
| <b>±</b>                 | plus or minus          |
| <b>b.p.m</b>             | beats per minute       |
| <b>Incl.</b>             | Including or inclusive |
| <b>Units of Measure</b>  |                        |
| <b>cm</b>                | centimetre             |
| <b>cm.H<sub>2</sub>O</b> | centimetres of water   |
| <b>l</b>                 | litre                  |
| <b>ml</b>                | millilitre             |
| <b>mm</b>                | millimetre             |
| <b>mm.Hg</b>             | millimetres of mercury |
| <b>kPa</b>               | kilopascal             |
| <b>kg</b>                | kilogram               |



# list of acronyms

|             |                                                                                                                                                                                              |
|-------------|----------------------------------------------------------------------------------------------------------------------------------------------------------------------------------------------|
| <b>AAMI</b> | Association for the Advancement of Medical Instrumentation                                                                                                                                   |
| <b>ANSI</b> | American National Standards Institute                                                                                                                                                        |
| <b>ABS</b>  | Acrylonitrile Butadiene Styrene: an opaque thermoplastic                                                                                                                                     |
| <b>AED</b>  | automated external defibrillator                                                                                                                                                             |
| <b>BHS</b>  | British Hypertension Society                                                                                                                                                                 |
| <b>BP</b>   | British Pharmacopoeia: Set of standards for medicinal and associated products.                                                                                                               |
| <b>CD</b>   | compact disk                                                                                                                                                                                 |
| <b>CE</b>   | Conformité Européene: A certification mark that indicates conformity with health, safety, and environmental protection standards for products sold within the European Economic Area         |
| <b>CEE</b>  | International standard from the International Electrotechnical Commission (IEC)                                                                                                              |
| <b>CFC</b>  | Chlorofluorocarbon: A family of refrigerants, now banned because of harmful environmental effects.                                                                                           |
| <b>CKS</b>  | Co-ordinating specification: not yet a national standard.                                                                                                                                    |
| <b>DIN</b>  | Deutsches Institut für Normung. German national organization for standardization                                                                                                             |
| <b>DIY</b>  | Do it yourself                                                                                                                                                                               |
| <b>DVD</b>  | Digital video disk                                                                                                                                                                           |
| <b>ECG</b>  | Electrocardiograph (machine), electrocardiogram (recording)                                                                                                                                  |
| <b>EN</b>   | European Norm: European Standards maintained by CEN (European Committee for Standardization), CENELEC and ETSI (European Telecommunications Standards Institute)                             |
| <b>ESH</b>  | European Society for Hypertension                                                                                                                                                            |
| <b>ET</b>   | Endotracheal tube                                                                                                                                                                            |
| <b>FDA</b>  | Food and Drug Administration. American body regulating medicines and medical devices in the United states of America.                                                                        |
| <b>F</b>    | French: a common measure of diameter of hollow catheters. The F number is calculated as 3X outer diameter of the catheter (in mm), i.e. a 4mm catheter is 12 F. Higher number means thicker. |
| <b>g</b>    | Gauge: a common measure of outer diameter of metal wire. Higher number means thinner.                                                                                                        |

|                 |                                                                                                                                                                                                |
|-----------------|------------------------------------------------------------------------------------------------------------------------------------------------------------------------------------------------|
| <b>GDH</b>      | Gauteng Department of Health                                                                                                                                                                   |
| <b>GT</b>       | Gauteng Provincial Tender                                                                                                                                                                      |
| <b>Hb</b>       | Haemoglobin                                                                                                                                                                                    |
| <b>beta-HCG</b> | Human Chorionic Gonadotrophin                                                                                                                                                                  |
| <b>HEPA</b>     | High Efficiency Particulate Arrestance Filter: 99.97% efficient on particles of 0.3microns in size                                                                                             |
| <b>HIV</b>      | Human Immunodeficiency Virus                                                                                                                                                                   |
| <b>ICT</b>      | Information and Communications Technology                                                                                                                                                      |
| <b>IEC</b>      | International Electrotechnical Commission: An international standards organisation that prepares and publishes International Standards for all electrical, electronic and related technologies |
| <b>IEEE</b>     | Institute of Electrical and Electronics Engineers                                                                                                                                              |
| <b>ISO</b>      | International Standards Organisation                                                                                                                                                           |
| <b>KDU</b>      | Knock Down Unit                                                                                                                                                                                |
| <b>LAN</b>      | Lime Ammonia Nitrogen fertiliser                                                                                                                                                               |
| <b>LCD</b>      | Liquid Crystal Display                                                                                                                                                                         |
| <b>LED</b>      | Light Emitting Diode                                                                                                                                                                           |
| <b>MAP</b>      | Mean Arterial Pressure                                                                                                                                                                         |
| <b>mdf</b>      | Medium density fibreboard: Synthetic wood substitute.                                                                                                                                          |
| <b>MOD</b>      | Modified                                                                                                                                                                                       |
| <b>MOU</b>      | Midwife Obstetric Unit                                                                                                                                                                         |
| <b>MTBF</b>     | Mean Time Before Failure                                                                                                                                                                       |
| <b>NHANES</b>   | US National Health and Nutrition Examination Survey                                                                                                                                            |
| <b>NHLS</b>     | National Health Laboratory Services                                                                                                                                                            |
| <b>OXIMETER</b> | Instrument for measuring capillary blood oxygen saturation.                                                                                                                                    |
| <b>PAWPER</b>   | Paediatric Advanced Weight Prediction in the Emergency Room                                                                                                                                    |

|                        |                                                                                                                                                         |
|------------------------|---------------------------------------------------------------------------------------------------------------------------------------------------------|
| <b>PEEP</b>            | Positive End-Expiratory Pressure                                                                                                                        |
| <b>PHC</b>             | Primary Health Care                                                                                                                                     |
| <b>PoCT</b>            | Point of Care Testing                                                                                                                                   |
| <b>POPI</b>            | Protection of Personal Information Act                                                                                                                  |
| <b>POP-OFF</b>         | Valve pops off at a defined pressure                                                                                                                    |
| <b>PQS</b>             | World Health Organisation Performance, Quality and Safety process. Defines standards and pre-qualifies cold chain equipment, and publishes a catalogue. |
| <b>PTFE</b>            | Polytetrafluoroethylene                                                                                                                                 |
| <b>PVC</b>             | Polyvinyl chloride plastic compound                                                                                                                     |
| <b>Rh</b>              | Rhesus Factor                                                                                                                                           |
| <b>SABS</b>            | South African Bureau of Standards: A body that has been accredited by SANS to certify that a product meets a SANS specification.                        |
| <b>SANS</b>            | South African National Standards: Publisher of South African standards.                                                                                 |
| <b>SCM</b>             | Supply Chain Management                                                                                                                                 |
| <b>SMS</b>             | Short Messaging Service                                                                                                                                 |
| <b>SOP</b>             | Standing Operational Procedure                                                                                                                          |
| <b>SpO<sub>2</sub></b> | Peripheral capillary oxygen saturation                                                                                                                  |
| <b>SVS</b>             | Stock Visibility System                                                                                                                                 |
| <b>TV</b>              | Television                                                                                                                                              |
| <b>USB</b>             | Universal Serial Bus                                                                                                                                    |
| <b>VAT</b>             | Value Added Tax                                                                                                                                         |
| <b>WBPHCOT</b>         | Ward-Based Primary Health Care Outreach Team                                                                                                            |
| <b>WHO</b>             | World Health Organisation                                                                                                                               |

# introduction

## PURPOSE OF THIS DOCUMENT

Procurement of commodities has been universally identified as a major obstacle to achieving Ideal Clinic status.

Poorly equipped facilities are not conducive to delivering quality health care.

This document has been conceived as a tool to assist in achieving Ideal Clinic status, by specifying:

- the right equipment and consumables
- quality and durability standards
- adequate quantities to permit efficient clinical activity.

## SCOPE

This document is applicable to Primary Health Care clinics and Community Health Centres.

## HOW TO USE THIS DOCUMENT

An Operational Manager should have a working knowledge of the first section. In most cases, the OM will not need to be familiar with the Technical Specifications (Appendix 2), but should understand how the items contribute to positive scores in the various components of the Ideal Clinic Framework (Appendix 2).

## HOW THE DOCUMENT IS ORGANIZED

**The document has three divisions:** the body, Appendix 1 and Appendix 2.

**The body of the document contains** details of each commodity. The commodities are organised into four groups:

- Equipment, Instruments, Consumables and Furniture and Appliances. Each group is subdivided into two or more subgroups. The divisions will be apparent by consulting the Tables of Content.

**For ease of navigation, the pages of each group are colour-coded in the margins.**

Equipment and Furniture and **Appliances** are treated similarly.

- Refer to sample on page 13
- Identifying data (catalogue number, standardized name, if available on transversal contracts, relevant contract number)
- Description, including an image, to allow the user to identify correct delivery

- Description of the use of the item
- What the user should expect the item to do/perform
- Accessories supplied as standard with the item
- Expected care of the item by the user
- Warranty information (if relevant)
- Cross reference to the page number of the corresponding Technical Specifications.

Instruments do not have a separate technical specification, as many instruments, e.g. forceps, share the same generic technical specification, and differ only in design. See sample on page 14

Consumables also do not have a separate technical specification, but where there are existing applicable standards, these are listed. There is no warranty information – ideally consumables should be consumed before warranties or expiry dates are exceeded, and faulty batches should be returned immediately. See sample on page 15.

**Appendix 1** contains the Technical Specifications for commodities in the categories Equipment and Furniture and Appliances.

- Refer to example on page 16
- These are specifications used to procure items, and will be applicable to forthcoming Transversal Contracts. Provinces and Districts can use these specifications for off-contract procurement
- They are intended to ensure the quality of the commodity items
- Functional specifications describe in technical terms, what the item should be made of, how it should work, and in some cases, how it should look
- Applicable standards are recognized South African or international quality and performance standards, with which the item must comply
- Performance specifications describe the environment in which the item will operate, what outputs it should produce, and how long it should last
- A list of accessories that the supplier must supply with the item
- Warranty terms and conditions expected from the supplier
- Special instructions to suppliers, e.g. to propose optional extras when bidding or quoting
- Note to Supply Chain Management to harmonise the procurement process.

**Appendix 2** contains the relevant components from the Ideal Clinic Framework, linking each commodity item to a specific component. Since there are obviously different requirements for clinics and Community Health Centres, there are separate component checklists for the two facility types.

## GENERAL EXCLUSIONS APPLICABLE TO ORAL HEALTH AND REHABILITATION SERVICES

### *Oral Health*

This catalogue is not applicable unless a facility is rendering, or preparing to render, Oral Health services.

The Equipment, Instruments and Consumables listed under Oral Health, are required to set up a new dental surgery. Some of the items listed, may not be suitable as replacements for older, existing equipment, because of compatibility issues. Replacements should be found on the relevant Treasury Term Contracts. A suitably qualified professional should be consulted before orders are finalised.

- For certain items, the final choice depends on environmental factors, such as availability of power and water. Alternatives are indicated, but a suitably qualified professional should be consulted before orders are finalised.
- The dental units referenced here, are supplied complete with handpieces. Handpieces are also listed separately for replacement purposes, but the choice has been limited to non-fibre-optic, stainless steel body types. Other types will be available on the term contract.
- In all cases, reference should be made to the Treasury Term Contract in force at the time.

### *Rehabilitation Services*

This catalogue is not applicable unless a facility is rendering, or preparing to render, Rehabilitation Services.

#### **Note that**

- In addition to the clinical equipment list in the following pages, there are a number of items listed under Equipment General, in the Basic Toolkit. See checklist 213 in Appendix 2.
- Note that the Tools items should only be ordered if:
  - there is a regular Rehabilitation Service provided at the facility;
  - there is a dedicated space for the provision of such service - the space is required to provide a safe working environment for the professional staff concerned;
  - power tools must not be operated where there are no adequate work surfaces, lighting and power sockets;
  - there is secure, lockable storage for the tools when not in use; the tools are expensive and very portable.

## example of item page layout

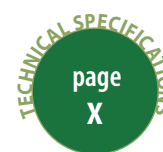

| Catalogue Number                                           | Item Name                     | Available on Transversal Contract                                                                   | Contract Number or Code                                                                                                                        |
|------------------------------------------------------------|-------------------------------|-----------------------------------------------------------------------------------------------------|------------------------------------------------------------------------------------------------------------------------------------------------|
| Number used in this catalogue for cross-reference purposes | Standardised name of the item | If <b>yes</b> , the reference number of the contract is provided, e.g. RT 252 of 2017; or <b>No</b> | If there is an active contract, the item number or code assigned in that contract, e.g. RT 252-01-05 ME is provided to facilitate procurement. |

|                                    |                                                                                                                              |                                                                                                                        |
|------------------------------------|------------------------------------------------------------------------------------------------------------------------------|------------------------------------------------------------------------------------------------------------------------|
| Description                        | A brief description of the item is provided here.                                                                            | Image of the item appears here<br> |
| Use                                | Specifies what the item is used for.                                                                                         |                                                                                                                        |
| Clinical or User Specifications    | Describes the physical and/or performance characteristics of the item, as required by an end-user.                           |                                                                                                                        |
| Accessories or Related Consumables | Accessories/spares supplied as standard with the item.                                                                       |                                                                                                                        |
| Care                               | Describes the reasonable care that the user is expected to take of the item.                                                 |                                                                                                                        |
| Maintenance                        | Describes specialised care to be performed by third parties. <i>Only applicable to some items.</i>                           |                                                                                                                        |
| Supplier Warranty                  | The period for which the supplier is responsible for durability and performance (excluding deliberate or accidental damage). |                                                                                                                        |

## example of instruments specifications page layout

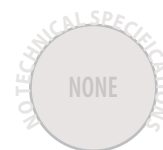

| Catalogue Number                                           | Item Name                     | Available on Transversal Contract                                                                   | Contract Number or Code                                                                                                                        |
|------------------------------------------------------------|-------------------------------|-----------------------------------------------------------------------------------------------------|------------------------------------------------------------------------------------------------------------------------------------------------|
| Number used in this catalogue for cross-reference purposes | Standardised name of the item | If <b>yes</b> , the reference number of the contract is provided, e.g. RT 252 of 2017; or <b>No</b> | If there is an active contract, the item number or code assigned in that contract, e.g. RT 252-01-05 ME is provided to facilitate procurement. |

|                                    |                                                                                                                                                                                                                                                                              |
|------------------------------------|------------------------------------------------------------------------------------------------------------------------------------------------------------------------------------------------------------------------------------------------------------------------------|
| Functional Specifications          | These specifications relate to the materials, design and construction of the item in relation to its intended use, e.g. the type of light source (LED), operating voltage (220V), radius of reach, mounting point and length of cable, for a wall-mounted examination light. |
| Applicable Standards               | List of recognised national (e.g. SANS) or international standards (e.g. ISO or CE), with which the item must be certified to comply.                                                                                                                                        |
| Performance Specifications         | These specifications may relate to operating conditions (e.g. ambient temperature), measurable outputs (e.g. temperature reduction in degrees Celsius), or expected longevity (e.g. Mean Time Before Failure)                                                                |
| Accessories or Related Consumables | List of accessories that must be supplied with the item.<br>Optional items, if approved via the procurement process, will be given a separate item number (e.g. a clinical stethoscope with a paediatric head).                                                              |
| Warranties                         | This section specifies the required duration of the warranty period, and any specific inclusions or exclusions.                                                                                                                                                              |
| Instructions to Suppliers          | There may be specific instructions to be given to suppliers during the procurement process, regarding optional equipment, delivery, installation, training, and maintenance.                                                                                                 |
| Note to Procurement                | Specific issues to be brought to the attention of Supply Chain Management (SCM) personnel, e.g. a preferred standardised Item Name to be used in future contracts. Also alerts SCM to the fact that certain items must be compatible with other items (serialised).          |

There is no cross-reference to Appendix 1, but these items may be cross-referenced in Appendix 2.



example of

# consumables item page layout

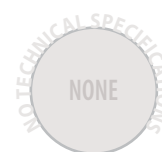

| Catalogue Number                                           | Item Name                     | Available on Transversal Contract                                                                   | Contract Number or Code                                                                                                                        |
|------------------------------------------------------------|-------------------------------|-----------------------------------------------------------------------------------------------------|------------------------------------------------------------------------------------------------------------------------------------------------|
| Number used in this catalogue for cross-reference purposes | Standardised name of the item | If <b>yes</b> , the reference number of the contract is provided, e.g. RT 252 of 2017; or <b>No</b> | If there is an active contract, the item number or code assigned in that contract, e.g. RT 252-01-05 ME is provided to facilitate procurement. |

|                      |                                                                                                                                                                                                                                                                     |                                                                                                                        |
|----------------------|---------------------------------------------------------------------------------------------------------------------------------------------------------------------------------------------------------------------------------------------------------------------|------------------------------------------------------------------------------------------------------------------------|
| Description          | A brief description of the item is provided here.                                                                                                                                                                                                                   | Image of the item appears here<br> |
| Use                  | Specifies what the item is used for.                                                                                                                                                                                                                                |                                                                                                                        |
| Applicable Standards | List of recognised national (e.g. SANS) or international standards (e.g. ISO or CE), with which the item must be certified to comply.                                                                                                                               |                                                                                                                        |
| Note to Procurement  | Specific issues to be brought to the attention of Supply Chain Management (SCM) personnel, e.g. a preferred standardised Item Name to be used in future contracts. Also alerts SCM to the fact that certain items must be compatible with other items (serialised). |                                                                                                                        |

There is no cross-reference to Appendix 1, but these items may be cross-referenced in Appendix 2.

## example of technical specifications page layout

| Catalogue Number                                           | Item Name                     | Available on Transversal Contract                                                                   | Contract Number or Code                                                                                                                        |
|------------------------------------------------------------|-------------------------------|-----------------------------------------------------------------------------------------------------|------------------------------------------------------------------------------------------------------------------------------------------------|
| Number used in this catalogue for cross-reference purposes | Standardised name of the item | If <b>yes</b> , the reference number of the contract is provided, e.g. RT 252 of 2017; or <b>No</b> | If there is an active contract, the item number or code assigned in that contract, e.g. RT 252-01-05 ME is provided to facilitate procurement. |

|                                    |                                                                                                                                                                                                                                                                              |
|------------------------------------|------------------------------------------------------------------------------------------------------------------------------------------------------------------------------------------------------------------------------------------------------------------------------|
| Functional Specifications          | These specifications relate to the materials, design and construction of the item in relation to its intended use, e.g. the type of light source (LED), operating voltage (220V), radius of reach, mounting point and length of cable, for a wall-mounted examination light. |
| Applicable Standards               | List of recognised national (e.g. SANS) or international standards (e.g. ISO or CE), with which the item must be certified to comply.                                                                                                                                        |
| Performance Specifications         | These specifications may relate to operating conditions (e.g. ambient temperature), measurable outputs (e.g. temperature reduction in degrees Celsius), or expected longevity (e.g. Mean Time Before Failure)                                                                |
| Accessories or Related Consumables | List of accessories that must be supplied with the item.<br>Optional items, if approved via the procurement process, will be given a separate item number (e.g. a clinical stethoscope with a paediatric head).                                                              |
| Warranties                         | This section specifies the required duration of the warranty period, and any specific inclusions or exclusions.                                                                                                                                                              |
| Instructions to Suppliers          | There may be specific instructions to be given to suppliers during the procurement process, regarding optional equipment, delivery, installation, training, and maintenance.                                                                                                 |
| Note to Procurement                | Specific issues to be brought to the attention of Supply Chain Management (SCM) personnel, e.g. a preferred standardised Item Name to be used in future contracts. Also alerts SCM to the fact that certain items must be compatible with other items (serialised).          |

# A

## equipment clinical

### DIAGNOSTIC

18

|                                                |    |
|------------------------------------------------|----|
| Blood pressure measurement: aneroid type       | 18 |
| Blood pressure monitor: automated non-invasive | 19 |
| Cardiotocograph                                | 20 |
| Diagnostic set: portable                       | 21 |
| Diagnostic set: wall mounted                   | 22 |
| Diagnostic combination set: wall mounted       | 23 |
| Electrocardiograph: 12 channel                 | 24 |
| Foetoscope                                     | 25 |
| Patella hammer                                 | 26 |
| Peak flow meter                                | 27 |
| Pulse oximeter: stand-alone                    | 28 |
| Scale: adult, with height board                | 29 |
| Scale: adult, without height board             | 30 |
| Scale: baby                                    | 31 |
| Stadiometer                                    | 32 |
| Stethoscope                                    | 33 |
| Syringe: ear                                   | 34 |
| Thermometer: digital, ear-type                 | 35 |
| Thermometer: digital, pen type                 | 36 |
| Torch: pupillary                               | 37 |
| Tuning fork                                    | 38 |

### ESSENTIAL

39

|                                            |    |
|--------------------------------------------|----|
| Examination light: ceiling-mounted         | 39 |
| Examination light: headlamp                | 40 |
| Examination light: mobile, without battery | 41 |
| Examination light: wall-mounted            | 42 |
| Tape: measuring                            | 43 |
| Tape: MUAC                                 | 44 |
| Urine collection                           | 45 |

### SPECIALISED

46

#### Resuscitation

46

|                                                                 |    |
|-----------------------------------------------------------------|----|
| Automated external defibrillator                                | 46 |
| Cardiac arrest board                                            | 48 |
| Infant warmer: radiant                                          | 49 |
| Infant warmer: mattress                                         | 50 |
| Infant warmer: temperature probe                                | 51 |
| Laryngoscope set                                                | 52 |
| Monitor: multi-function vital signs, including SpO <sub>2</sub> | 53 |
| Nebuliser                                                       | 54 |
| Oxygen regulator with flow-meter                                | 55 |
| Resuscitators: manual                                           | 56 |
| Suction machine: portable                                       | 57 |
| Suction machine: trolley type                                   | 58 |
| Tape: Broselow                                                  | 59 |
| Tape: PAWPER and flipper chart                                  | 60 |

#### Point of Care Testing

61

|                   |    |
|-------------------|----|
| Glucometer        | 61 |
| Haemoglobinometer | 62 |

### Sterilisation

63

|                                |    |
|--------------------------------|----|
| Autoclave: tabletop            | 63 |
| Instrument steriliser: desktop | 65 |

### Oral Health

67

|                                                            |    |
|------------------------------------------------------------|----|
| Amalgam separator: 2 surgeries                             | 67 |
| Amalgamator: digital                                       | 68 |
| Autoclave: cassette-type, desktop                          | 69 |
| Compressor: 2-4 surgeries                                  | 70 |
| Cuspidor/Spittoon/Water Unit                               | 71 |
| Delivery system: mobile, with hand pieces, non-fibre-optic | 72 |
| Delivery system: fixed, with hand pieces, non-fibre-optic  | 73 |
| Dental chair: basic                                        | 74 |
| Dental chair: portable                                     | 75 |
| Dental curing light                                        | 76 |
| Dental handpieces: non-fibre-optic                         | 77 |
| Dental light: LED                                          | 78 |
| Dental scaler: air                                         | 79 |
| Suction: dry, 2-3 surgeries                                | 80 |
| Suction: dry, mobile                                       | 81 |
| Suction: wet, 2-4 surgeries                                | 82 |
| Ultrasonic cleaner                                         | 83 |
| Water distillation                                         | 84 |
| X-ray Apron                                                | 85 |
| X-ray: Digital oral imaging plate with a computer          | 87 |

### Rehabilitation

88

|                                            |     |
|--------------------------------------------|-----|
| Aluminium crutches                         | 88  |
| Balance pad                                | 89  |
| Basin: portable, large                     | 90  |
| Bobath ball                                | 91  |
| Bobath roller                              | 92  |
| Construction play equipment                | 93  |
| Hot water bottle: standard                 | 94  |
| Mat: gym                                   | 95  |
| Mirror: handheld                           | 96  |
| Soccer ball                                | 97  |
| Standing frame: prone upper standing frame | 98  |
| Tape measure: retractable, soft            | 99  |
| Toys: multisensory                         | 100 |
| Transfer board                             | 101 |
| Walking frame                              | 102 |
| Walking stick                              | 104 |
| Wedges: set of 4                           | 105 |
| Weight band: ankle and wrist               | 106 |
| Wheelchair                                 | 107 |
| Audiometer: portable                       | 109 |
| Cards: therapy, speech                     | 110 |
| HiPro box                                  | 111 |
| Noise makers                               | 112 |
| OAE/AABR screener (portable)               | 113 |
| Otolight                                   | 114 |
| Otoscope: portable                         | 115 |
| Tympanometer: portable, screening          | 116 |

# Diagnostic

## Blood pressure measurement: aneroid type

| Catalogue Number | Item Name                 | Available on Transversal Contract | Contract Number or Code |
|------------------|---------------------------|-----------------------------------|-------------------------|
| PHC-E-115        | Sphygmomanometer: aneroid | No                                |                         |

|                                    |                                                                                                                                                                                                                                                                                                                                                                                         |                                                                                      |
|------------------------------------|-----------------------------------------------------------------------------------------------------------------------------------------------------------------------------------------------------------------------------------------------------------------------------------------------------------------------------------------------------------------------------------------|--------------------------------------------------------------------------------------|
| Description                        | A unit which measures blood pressure.                                                                                                                                                                                                                                                                                                                                                   |  |
| Use                                | Suitable for blood pressure measurement by a clinician, using the auscultatory method. This is the preferable type if the patient has a disturbance of heart rhythm, e.g. Atrial fibrillation.                                                                                                                                                                                          |                                                                                      |
| Clinical or User Specifications    | <p>The user inflates and deflates an upper-arm cuff, by squeezing a bulb and closing or releasing the exit valve. Blood pressure is displayed on a large, clear, high-contrast analogue gauge, with a dial graduated in mm.Hg.</p> <p>Not dependent on an external power source.</p> <p>The unit can be mounted to a desktop, or to an adjacent wall or pole with special brackets.</p> |                                                                                      |
| Accessories or Related Consumables | <p>Large adult, adult and paediatric upper-arm cuffs.</p> <p>Special mounting brackets must be ordered separately, if required.</p>                                                                                                                                                                                                                                                     |                                                                                      |
| Care                               | <p>Clinicians must be adequately trained on the correct identification of the Korotkoff sounds.</p> <p>The cuffs (outer cover and inflatable bladder) can be washed. They must be replaced if worn or damaged, or if the Velcro is no longer adhering.</p>                                                                                                                              |                                                                                      |
| Maintenance                        | The unit must be calibrated at least annually, by technical personnel of the department or the supplier.                                                                                                                                                                                                                                                                                |                                                                                      |
| Supplier Warranty                  | <p>2 years on cuffs and covers (including bladders, tubes, outer covers, inflation bulbs, air inlet valves, release valves, filters, and cuff-fastening mechanism – velcro or other).</p> <p>Instrument itself guaranteed for 10 years, including an annual calibration guarantee.</p> <p>Guarantee excludes deliberate or accidental damage.</p>                                       |                                                                                      |

# Blood pressure monitor: automated non-invasive

| Catalogue Number | Item Name                                                      | Available on Transversal Contract | Contract Number or Code |
|------------------|----------------------------------------------------------------|-----------------------------------|-------------------------|
| PHC-E-116        | Blood pressure monitor: automated, non-invasive, desktop model | RT 2                              | 42272501-00002          |

|                                 |                                                                                                                                                                                                                                                                                                                                                                                                                                                                                                                    |                                                                                     |
|---------------------------------|--------------------------------------------------------------------------------------------------------------------------------------------------------------------------------------------------------------------------------------------------------------------------------------------------------------------------------------------------------------------------------------------------------------------------------------------------------------------------------------------------------------------|-------------------------------------------------------------------------------------|
| Description                     | <p>An electronic unit which automatically measures and records systolic and diastolic blood pressure and pulse rate.</p>                                                                                                                                                                                                                                                                                                                                                                                           |  |
| Use                             | <p>Suitable for blood pressure screening in high patient-load areas, such as where vital signs are recorded. Note: not accurate if the patient has a disturbance of heart rhythm, e.g. Atrial fibrillation, therefore should not be selected for consultation rooms.</p>                                                                                                                                                                                                                                           |                                                                                     |
| Clinical or User Specifications | <p>The unit will automatically inflate and deflate an upper-arm cuff, once the start button is pressed. The unit records and displays the blood pressure and pulse readings, which are also stored in memory until over-written.</p> <p>The unit has a built-in battery, which charges from the mains in normal use, and can keep the unit operating for at least 8 hours, in the event of a power failure.</p> <p>The unit can be mounted to a desktop, or to an adjacent wall or pole with special brackets.</p> |                                                                                     |
| Accessories/related consumables | <p>Large adult, adult and paediatric upper-arm cuffs.</p> <p>Special mounting brackets must be ordered separately, if required.</p>                                                                                                                                                                                                                                                                                                                                                                                |                                                                                     |
| Care                            | <p>If the unit does not work, but power is on, have it checked immediately.</p> <p>The internal battery will need replacement, typically after 300 charge-discharge cycles.</p> <p>The cuffs (outer cover and inflatable bladder) can be washed. They must be replaced if worn or damaged, or if the Velcro is no longer adhering.</p> <p>The unit must be calibrated at least annually, preferably 6-monthly.</p>                                                                                                 |                                                                                     |
| Maintenance                     | <p>The unit must be calibrated at least annually, by technical personnel of the department or the supplier.</p> <p>Internal battery must be replaced when prompted to do so by the battery indicator. Contact technical personnel of the department or the supplier.</p>                                                                                                                                                                                                                                           |                                                                                     |
| Supplier Warranty               | <p>3 years on all parts, including cuffs and covers, but excluding batteries. Batteries guaranteed for at least 300 charge cycles, or 2 years. Guarantee excludes deliberate or accidental damage.</p>                                                                                                                                                                                                                                                                                                             |                                                                                     |

# Cardiotocograph

| Catalogue Number | Item Name       | Available on Transversal Contract | Contract Number or Code |
|------------------|-----------------|-----------------------------------|-------------------------|
| PHC-E-265        | Cardiotocograph | RT2-2016                          | 42181701-00005          |

|                                 |                                                                                                                                                                                                                                                       |                                                                                     |
|---------------------------------|-------------------------------------------------------------------------------------------------------------------------------------------------------------------------------------------------------------------------------------------------------|-------------------------------------------------------------------------------------|
| Description                     | An ultra-sound based instrument to detect foetal heart activity in pregnancy.                                                                                                                                                                         |  |
| Use                             | For external monitoring of foetal heart rate, and external monitoring of uterine activity of pregnant patients.                                                                                                                                       |                                                                                     |
| Clinical or User Specifications | Twins monitoring is required.<br>Must perform automatic self-check when switched on.<br>Visible flashing foetal heart rate indicator foetal heart rate.                                                                                               |                                                                                     |
| Accessories/related consumables | Ultrasound probes, all connections and power cables.                                                                                                                                                                                                  |                                                                                     |
| Care                            | Standard cleaning and disinfection.                                                                                                                                                                                                                   |                                                                                     |
| Maintenance                     | The unit must be calibrated at least annually, by technical personnel of the department or the supplier.<br>This unit must be supplied with a 5 - year maintenance contract. Service procedures and service intervals as per Supplier's instructions. |                                                                                     |
| Supplier Warranty               | 2 years (excluding deliberate or accidental damage).                                                                                                                                                                                                  |                                                                                     |

# Diagnostic set: portable

| Catalogue Number | Item Name                | Available on Transversal Contract | Contract Number or Code |
|------------------|--------------------------|-----------------------------------|-------------------------|
| PHC-E-117        | Diagnostic set: portable | RT 252                            | RT 252-01-050 ME        |

|                                    |                                                                                                                                                                                                                                                                                                                                                                                                                                                                                                                                                           |                                                                                     |
|------------------------------------|-----------------------------------------------------------------------------------------------------------------------------------------------------------------------------------------------------------------------------------------------------------------------------------------------------------------------------------------------------------------------------------------------------------------------------------------------------------------------------------------------------------------------------------------------------------|-------------------------------------------------------------------------------------|
| Description                        | <p>Battery-powered portable set consisting of ophthalmoscope, otoscope and illuminated tongue blade depressor.</p>                                                                                                                                                                                                                                                                                                                                                                                                                                        |  |
| Use                                | Used for examining the eyes (particularly the fundi), the ears and nasal cavity, and the throat.                                                                                                                                                                                                                                                                                                                                                                                                                                                          |                                                                                     |
| Clinical or User Specifications    | <p>Container with zip or other closure, housing:</p> <ul style="list-style-type: none"> <li>A mirror-type ophthalmoscope, with standard focussing device and range of lenses;</li> <li>An otoscope, with a fibre-optic light path;</li> <li>Re-usable plastic otoscope specula, in 4 sizes;</li> <li>Illuminated tongue blade depressor, with lamp and holding screw for disposable wooden tongue blades;</li> <li>Knurled handle, housing two non-corrosive batteries; connector for the instruments, and rheostat for brightness adjustment.</li> </ul> |                                                                                     |
| Accessories or Related Consumables | <p>1 spare globe ophthalmoscope.</p> <p>1 spare globe otoscope.</p> <p>1 set batteries – standard Size C 1,5V alkaline.</p>                                                                                                                                                                                                                                                                                                                                                                                                                               |                                                                                     |
| Care                               | <p>Clean and disinfect with standard solutions.</p> <p>Replace batteries if the light is dim.</p> <p>Check batteries for leakage at least monthly.</p> <p>If globe burns out, replace or have replaced by technical personnel.</p>                                                                                                                                                                                                                                                                                                                        |                                                                                     |
| Supplier Warranty                  | 2 years.                                                                                                                                                                                                                                                                                                                                                                                                                                                                                                                                                  |                                                                                     |

## Diagnostic set: wall mounted

| Catalogue Number | Item Name                    | Available on Transversal Contract | Contract Number or Code |
|------------------|------------------------------|-----------------------------------|-------------------------|
| PHC-E-118        | Diagnostic set: wall-mounted | No                                | RT 252-01-05 ME         |

|                                    |                                                                                                                                                                                                                                                                                                                                                                                                                                                                                                  |                                                                                     |
|------------------------------------|--------------------------------------------------------------------------------------------------------------------------------------------------------------------------------------------------------------------------------------------------------------------------------------------------------------------------------------------------------------------------------------------------------------------------------------------------------------------------------------------------|-------------------------------------------------------------------------------------|
| Description                        | <p>A wall-mounted unit, combining a wall-mounted cradle, an otoscope, an ophthalmoscope, and the necessary transformer.</p>                                                                                                                                                                                                                                                                                                                                                                      |  |
| Use                                | <p>The Ophthalmoscope is used to examine the fundus of the eye, to check for signs of acute disease (e.g. raised intracranial pressure) or chronic disease (e.g. cataracts or vascular changes associated with Diabetes Mellitus or Hypertension).</p> <p>The Otoscope is used to examine the ear canal (wax or foreign bodies) and the middle ear (perforation of eardrum, or signs of fluid or infection in the middle ear).</p>                                                               |                                                                                     |
| Clinical or User Specifications    | <p>Wall-mounted – cannot be misplaced. Must be mounted on the wall behind the examination couch, towards the head end of the couch.</p> <p>Powered by mains electricity – no batteries.</p> <p>Instruments switch on automatically when lifted out of cradle.</p> <p>Brightness of light is adjustable.</p> <p>Ophthalmoscope has different lenses and filters to accommodate clinical needs.</p> <p>Long cables permit examination irrespective of patient's position.</p>                      |                                                                                     |
| Accessories or Related Consumables | <p>The Otoscope is supplied with four re-usable specula, from infant to adult sizes.</p>                                                                                                                                                                                                                                                                                                                                                                                                         |                                                                                     |
| Care                               | <p>Keep unit connected to mains.</p> <p>Bulbs are long-life types, but may need replacement from time to time. Contact service personnel immediately.</p> <p>Keep cables from twisting excessively. If cables fray, have them replaced.</p> <p>If unit does not work, but the power is on, have unit checked immediately.</p> <p>Keep a small container of disinfectant solution handy, to clean ear specula after each use.</p> <p>Clean with standard cleaning and disinfectant solutions.</p> |                                                                                     |
| Supplier Warranty                  | <p>7 years on instrument heads. Cables 2 years. Transformer 1 year (excluding accidental or deliberate damage, power disruptions/surges, lightning strike).</p>                                                                                                                                                                                                                                                                                                                                  |                                                                                     |



# Diagnostic combination set: wall mounted

| Catalogue Number | Item Name                                | Available on Transversal Contract | Contract Number or Code |
|------------------|------------------------------------------|-----------------------------------|-------------------------|
| PHC-E-119        | Diagnostic combination set: wall-mounted | No                                |                         |

|                                 |                                                                                                                                                                                                                                                                                                                                                                                                                                                                                                                          |                                                                                     |
|---------------------------------|--------------------------------------------------------------------------------------------------------------------------------------------------------------------------------------------------------------------------------------------------------------------------------------------------------------------------------------------------------------------------------------------------------------------------------------------------------------------------------------------------------------------------|-------------------------------------------------------------------------------------|
| Description                     | <p>A wall-mounted unit, combining a wall-mounted cradle, an otoscope, an ophthalmoscope, an aneroid-type sphygmomanometer, rotatable-head and the necessary transformer.</p>                                                                                                                                                                                                                                                                                                                                             |  |
| Use                             | <p>The Ophthalmoscope is used to examine the fundus of the eye, to check for signs of acute disease (e.g. raised intracranial pressure) or chronic disease (e.g. cataracts or vascular changes associated with Diabetes Mellitus or Hypertension).</p> <p>The Otoscope is used to examine the ear canal (wax or foreign bodies) and the middle ear (perforation of eardrum, or signs of fluid or infection in the middle ear).</p> <p>The Sphygmomanometer is used to measure systolic and diastolic blood pressure.</p> |                                                                                     |
| Clinical or User Specifications | <p>Wall-mounted – cannot be misplaced. Must be mounted on the wall behind the examination couch, towards the head end of the couch.</p> <p>Powered by mains electricity – no batteries.</p> <p>Instruments switch on automatically when lifted out of cradle.</p> <p>Brightness of light is adjustable.</p> <p>Ophthalmoscope has different lenses and filters to accommodate clinical needs.</p> <p>Long cables permit examination irrespective of patient's position.</p> <p>Sphygmomanometer has a large display.</p> |                                                                                     |
| Accessories/related consumables | <p>The otoscope is supplied with four re-usable specula, from infant to adult sizes.</p> <p>The sphygmomanometer, is supplied with large adult, adult, paediatric and infant cuffs (complete with bladders, cover and tubing and connectors).</p>                                                                                                                                                                                                                                                                        |                                                                                     |
| Care                            | <p>Keep unit connected to mains.</p> <p>Bulbs are long-life types, but may need replacement from time to time. Contact service personnel immediately.</p> <p>Keep cables from twisting excessively. If cables fray, have them replaced.</p> <p>If unit does not work, but the power is on, have unit checked immediately.</p> <p>Keep a small container of disinfectant solution handy, to clean ear specula after each use.</p> <p>Clean with standard cleaning and disinfectant solutions.</p>                         |                                                                                     |
| Supplier Warranty               | <p>7 years on instrument heads. Cables 2 years. Transformer 1 year (excluding accidental or deliberate damage, power disruptions/surges, lightning strike).</p>                                                                                                                                                                                                                                                                                                                                                          |                                                                                     |

## Electrocardiograph: 12 channel

| Catalogue Number | Item Name                               | Available on Transversal Contract | Contract Number or Code |
|------------------|-----------------------------------------|-----------------------------------|-------------------------|
| PHC-E-165        | Electrocardiograph (ECG):<br>12 channel | RT 2-2016                         | 42295104-00001          |

|                                 |                                                                                                                                                                                                                                                                  |                                                                                     |
|---------------------------------|------------------------------------------------------------------------------------------------------------------------------------------------------------------------------------------------------------------------------------------------------------------|-------------------------------------------------------------------------------------|
| Description                     | Trolley-mounted 12-channel ECG machine.                                                                                                                                                                                                                          |  |
| Use                             | To record the electrical activity of the heart.                                                                                                                                                                                                                  |                                                                                     |
| Clinical or User Specifications | <p>Machine records ECG on A4 paper.</p> <p>Three leads are displayed on the built-in screen.</p> <p>Extensive self-test facilities.</p> <p>Built-in measurement and diagnostic algorithms.</p> <p>Can run for 2 hours on battery if there is no mains power.</p> |                                                                                     |
| Accessories/related consumables | <p>Trolley on four castors.</p> <p>A starter-pack of consumables must be supplied with the unit.</p> <p>ECG cable with adaptor clips.</p> <p>Operator's manual.</p> <p>ECG electrodes: disposable, self-adhesive, for resting ECG. PHC-C-212.</p>                |                                                                                     |
| Care                            | <p>Keep charged at all times.</p> <p>Run off mains power when possible.</p>                                                                                                                                                                                      |                                                                                     |
| Supplier Warranty               | <p>2 years (excluding deliberate or accidental damage).</p> <p>5-year maintenance contract.</p>                                                                                                                                                                  |                                                                                     |

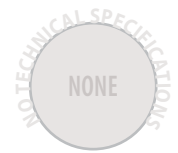

# Foetoscope

| Catalogue Number | Item Name  | Available on Transversal Contract | Contract Number or Code |
|------------------|------------|-----------------------------------|-------------------------|
| PHC-E-266        | Foetoscope | No                                |                         |

|                                 |                                                   |                                                                                     |
|---------------------------------|---------------------------------------------------|-------------------------------------------------------------------------------------|
| Description                     | Pinard horn stethoscope, in plastic or aluminium. |  |
| Use                             | To hear the foetal heartbeat.                     |                                                                                     |
| Clinical or User Specifications | No sharp edges.                                   |                                                                                     |
| Accessories/related consumables |                                                   |                                                                                     |
| Care                            | Standard cleaning and disinfection.               |                                                                                     |
| Supplier Warranty               |                                                   |                                                                                     |

# Patella hammer

| Catalogue Number | Item Name      | Available on Transversal Contract | Contract Number or Code |
|------------------|----------------|-----------------------------------|-------------------------|
| PHC-E-120        | Patella hammer | RT 252                            | RT 252-01-163 ME        |

|                                 |                                                                                                                                                                                                                                                                                                                                                                                |                                                                                     |
|---------------------------------|--------------------------------------------------------------------------------------------------------------------------------------------------------------------------------------------------------------------------------------------------------------------------------------------------------------------------------------------------------------------------------|-------------------------------------------------------------------------------------|
| Description                     | Dejerine-pattern percussion hammer.                                                                                                                                                                                                                                                                                                                                            |  |
| Use                             | Used for assessing presence and strength of tendon reflexes.                                                                                                                                                                                                                                                                                                                   |                                                                                     |
| Clinical or User Specifications | <p>Metal mallet-style hammer head, with cylindrical solid rubber heads on both faces.</p> <p>Metal handle screws into hammer head.</p> <p>Point of handle houses a screw-in pointed tip, for the testing of cutaneous pinprick sensation. However, it's use is not recommended because of possibility of cross-contamination.</p> <p>All metal components are non-rusting.</p> |                                                                                     |
| Accessories/related consumables |                                                                                                                                                                                                                                                                                                                                                                                |                                                                                     |
| Care                            | Clean and disinfect with standard solutions.                                                                                                                                                                                                                                                                                                                                   |                                                                                     |
| Supplier Warranty               | 2 years.                                                                                                                                                                                                                                                                                                                                                                       |                                                                                     |

# Peak flow meter

| Catalogue Number | Item Name       | Available on Transversal Contract | Contract Number or Code |
|------------------|-----------------|-----------------------------------|-------------------------|
| PHC-E-267        | Peak flow meter | No                                | RT 252-01-163 ME        |

|                                 |                                                                                                                                                                                                                                                                                              |                                                                                     |
|---------------------------------|----------------------------------------------------------------------------------------------------------------------------------------------------------------------------------------------------------------------------------------------------------------------------------------------|-------------------------------------------------------------------------------------|
| Description                     | A tubular instrument with a mouthpiece and a scale on which the peak flow is read.                                                                                                                                                                                                           |  |
| Use                             | Used to measure the peak expiratory flow (in l/min), which is a proxy for the narrowing of the airways in acute or chronic airways disease. The patient is encouraged to exhale through the instrument as forcefully as possible, and the position of a sliding pointer is read off a scale. |                                                                                     |
| Clinical or User Specifications | Disposable paper mouthpiece inserts.<br>Direct-reading scale on side of instrument.                                                                                                                                                                                                          |                                                                                     |
| Accessories/related consumables | Disposable mouthpiece PHC-C-341.                                                                                                                                                                                                                                                             |                                                                                     |
| Care                            | Standard cleaning and disinfection.                                                                                                                                                                                                                                                          |                                                                                     |
| Supplier Warranty               | 1 year.                                                                                                                                                                                                                                                                                      |                                                                                     |

## Pulse oximeter: stand-alone

| Catalogue Number | Item Name                   | Available on Transversal Contract | Contract Number or Code |
|------------------|-----------------------------|-----------------------------------|-------------------------|
| PHC-E-139        | Pulse oximeter: stand-alone | RT 4                              | RT 4-05-055 ME          |

|                                    |                                                                                                                                                                                                                                                                                                                                                                                                                                                                               |                                                                                     |
|------------------------------------|-------------------------------------------------------------------------------------------------------------------------------------------------------------------------------------------------------------------------------------------------------------------------------------------------------------------------------------------------------------------------------------------------------------------------------------------------------------------------------|-------------------------------------------------------------------------------------|
| Description                        | Portable pulse oximeter.                                                                                                                                                                                                                                                                                                                                                                                                                                                      |  |
| Use                                | <p>The device measures the oxygenation of peripheral capillary blood, in the fingertip of an adult or the toe of a child or neonate.</p> <p>The degree of oxygenation is useful in measuring the effectiveness of cardiopulmonary resuscitation, as well as the effectiveness of oxygen therapy in patients suffering from chronic lung disease.</p> <p>This device can be used in facilities where the existing vital signs monitor lacks the pulse oximetry capability.</p> |                                                                                     |
| Clinical or User Specifications    | Portable hand-held battery-operated pulse oximeter.                                                                                                                                                                                                                                                                                                                                                                                                                           |                                                                                     |
| Accessories or Related Consumables | Adult and paediatric non-disposable finger-tip probes.                                                                                                                                                                                                                                                                                                                                                                                                                        |                                                                                     |
| Care                               | <p>Standard cleaning and disinfecting.</p> <p>Change batteries when prompted to do so by "low battery" indicator.</p>                                                                                                                                                                                                                                                                                                                                                         |                                                                                     |
| Supplier Warranty                  | 2 years (excluding deliberate or accidental damage).                                                                                                                                                                                                                                                                                                                                                                                                                          |                                                                                     |

## Scale: adult, with height board

| Catalogue Number | Item Name                     | Available on Transversal Contract | Contract Number or Code |
|------------------|-------------------------------|-----------------------------------|-------------------------|
| PHC-E-122        | Scale: adult, with height rod | RT 24                             | RT 24-08-005            |

|                                    |                                                                                                   |                                                                                     |
|------------------------------------|---------------------------------------------------------------------------------------------------|-------------------------------------------------------------------------------------|
| Description                        | Adult scale with height rod.                                                                      |  |
| Use                                | To be used for height and weight screening.                                                       |                                                                                     |
| Clinical or User Specifications    | Mechanical scale. Up to 150kg.<br>Incorporates height rod.                                        |                                                                                     |
| Accessories or Related Consumables |                                                                                                   |                                                                                     |
| Care                               | Standard cleaning and disinfecting.                                                               |                                                                                     |
| Maintenance                        | Scale must be calibrated at least annually. Contact departmental technical personnel or supplier. |                                                                                     |
| Supplier Warranty                  | 2 years (excluding deliberate or accidental damage).                                              |                                                                                     |

## Scale: adult, without height board

| Catalogue Number | Item Name                          | Available on Transversal Contract | Contract Number or Code |
|------------------|------------------------------------|-----------------------------------|-------------------------|
| PHC-E-123        | Scale: adult, without height board | RT 24                             | RT 24-08-003            |

|                                    |                                                                                                   |                                                                                     |
|------------------------------------|---------------------------------------------------------------------------------------------------|-------------------------------------------------------------------------------------|
| Description                        | Adult scale.                                                                                      |  |
| Use                                | To be used for weight screening.                                                                  |                                                                                     |
| Clinical or User Specifications    | Mechanical scale, up to 150kg.                                                                    |                                                                                     |
| Accessories or Related Consumables |                                                                                                   |                                                                                     |
| Care                               | Standard cleaning and disinfecting.                                                               |                                                                                     |
| Maintenance                        | Scale must be calibrated at least annually. Contact departmental technical personnel or supplier. |                                                                                     |
| Supplier Warranty                  | 2 years (excluding deliberate or accidental damage).                                              |                                                                                     |



# Scale: baby

| Catalogue Number | Item Name  | Available on Transversal Contract | Contract Number or Code |
|------------------|------------|-----------------------------------|-------------------------|
| PHC-E-124        | Baby scale | RT 24                             | RT 24-08-001            |

|                                    |                                                                                                                                                                                                                                       |                                                                                    |
|------------------------------------|---------------------------------------------------------------------------------------------------------------------------------------------------------------------------------------------------------------------------------------|------------------------------------------------------------------------------------|
| Description                        | Baby scale.                                                                                                                                                                                                                           |  |
| Use                                | To be used for weighing of babies in consulting rooms.                                                                                                                                                                                |                                                                                    |
| Clinical or User Specifications    | Electronic, battery-operated scale, up to 20kg. Auto switch-off to conserve battery power. Retains last reading.                                                                                                                      |                                                                                    |
| Accessories or Related Consumables | Set of batteries.                                                                                                                                                                                                                     |                                                                                    |
| Care                               | Standard cleaning and disinfecting.<br>Replace battery(ies) with same model cells, when prompted to do so by the battery indicator.<br>If corrosion is noted in the battery contacts, report the item to technical service personnel. |                                                                                    |
| Maintenance                        | Scale must be calibrated at least annually. Contact departmental technical personnel or supplier.                                                                                                                                     |                                                                                    |
| Supplier Warranty                  | 2 years (excluding deliberate or accidental damage).                                                                                                                                                                                  |                                                                                    |

# Stadiometer

| Catalogue Number | Item Name   | Available on Transversal Contract | Contract Number or Code |
|------------------|-------------|-----------------------------------|-------------------------|
| PHC-E-125        | Stadiometer | RT 24                             | RT 24-08-009            |

|                                    |                                                            |                                                                                     |
|------------------------------------|------------------------------------------------------------|-------------------------------------------------------------------------------------|
| Description                        | Stadiometer.                                               |  |
| Use                                | To measure height of children and adults while standing.   |                                                                                     |
| Clinical or User Specifications    | Wall-mounted height board, not attached to a weight scale. |                                                                                     |
| Accessories or Related Consumables |                                                            |                                                                                     |
| Care                               | Standard cleaning and disinfecting.                        |                                                                                     |
| Supplier Warranty                  | 2 years (excluding deliberate or accidental damage).       |                                                                                     |

# Stethoscope

| Catalogue Number | Item Name              | Available on Transversal Contract | Contract Number or Code |
|------------------|------------------------|-----------------------------------|-------------------------|
| PHC-E-126        | Stethoscope: dual head | No                                |                         |

|                                    |                                                                                                                                                                                                                                                                                                                                                                                                   |
|------------------------------------|---------------------------------------------------------------------------------------------------------------------------------------------------------------------------------------------------------------------------------------------------------------------------------------------------------------------------------------------------------------------------------------------------|
| Description                        | <p>A single-tube, rotatable-head general-purpose stethoscope.</p>                                                                                                                                                                                                                                              |
| Use                                | For checking blood pressure, auscultation of the heart, lung fields, abdomen and arterial bruits.                                                                                                                                                                                                                                                                                                 |
| Clinical or User Specifications    | <p>The single-tube design eliminates rubbing noises. The instrument has been chosen to selectively amplify sounds of clinical interest, while blocking out environmental noises. The bell or the diaphragm can be rotated into position, depending on the clinical use.</p> <p>For optimal use, the auditory pathway between the patient's body and the clinician's ears, should be airtight.</p> |
| Accessories or Related Consumables | <p>Spare diaphragm.</p> <p>Spare earpieces (soft and hard).</p>                                                                                                                                                                                                                                                                                                                                   |
| Care                               | <p>The instrument should be handled with care.</p> <p>The spring on the headpiece should not be over-extended.</p> <p>Ensure that the earpieces are screwed on firmly, to prevent loss.</p> <p>The instrument should be wiped down with an approved disinfectant regularly.</p>                                                                                                                   |
| Supplier Warranty                  | 5 years (excluding deliberate or accidental damage).                                                                                                                                                                                                                                                                                                                                              |

# Syringe: ear

| Catalogue Number | Item Name   | Available on Transversal Contract | Contract Number or Code |
|------------------|-------------|-----------------------------------|-------------------------|
| PHC-E-127        | Syringe:ear | No                                |                         |

|                                    |                                                        |                                                                                     |
|------------------------------------|--------------------------------------------------------|-------------------------------------------------------------------------------------|
| Description                        | Ear syringe.                                           |  |
| Use                                | Instrument to remove wax from ears by gentle flushing. |                                                                                     |
| Clinical or User Specifications    | Ergonomic design for easy, single-handed operation.    |                                                                                     |
| Accessories or Related Consumables | Silicone tips.<br>Re-usable silicone tips.             |                                                                                     |
| Care                               | Standard cleaning and disinfection.                    |                                                                                     |
| Supplier Warranty                  | 1 year (excluding deliberate or accidental damage).    |                                                                                     |

# Thermometer: digital, ear-type

| Catalogue Number | Item Name                      | Available on Transversal Contract | Contract Number or Code |
|------------------|--------------------------------|-----------------------------------|-------------------------|
| PHC-E-130        | Thermometer: digital, ear-type | No                                |                         |

|                                    |                                                                                                                                                                                                                                                                                                                                                                            |                                                                                     |
|------------------------------------|----------------------------------------------------------------------------------------------------------------------------------------------------------------------------------------------------------------------------------------------------------------------------------------------------------------------------------------------------------------------------|-------------------------------------------------------------------------------------|
| Description                        | Ear-type thermometer.                                                                                                                                                                                                                                                                                                                                                      |  |
| Use                                | For measuring body temperature.                                                                                                                                                                                                                                                                                                                                            |                                                                                     |
| Clinical or User Specifications    | <p>Electronic, battery powered thermometer, for measuring body temperature at the external auditory meatus. Not suitable for infants – use pen-type thermometer for infants.</p> <p>Batteries may be alkaline type or re-chargeable, depending on model procured.</p> <p>Less affected by high ambient temperature and sweating than no-touch infra-red sensing types.</p> |                                                                                     |
| Accessories or Related Consumables | Thermometer probe covers: disposable PHC-C-178.                                                                                                                                                                                                                                                                                                                            |                                                                                     |
| Care                               | <p>Standard cleaning and disinfection.</p> <p>Replace batteries with the same model cells when required, or keep batteries charged (depends on model procured).</p>                                                                                                                                                                                                        |                                                                                     |
| Supplier Warranty                  | 2 years.                                                                                                                                                                                                                                                                                                                                                                   |                                                                                     |

## Thermometer: digital, pen type

| Catalogue Number | Item Name                     | Available on Transversal Contract | Contract Number or Code |
|------------------|-------------------------------|-----------------------------------|-------------------------|
| PHC-E-131        | Thermometer: digital pen type | No                                |                         |

|                                    |                                                                                                                                                                             |                                                                                    |
|------------------------------------|-----------------------------------------------------------------------------------------------------------------------------------------------------------------------------|------------------------------------------------------------------------------------|
| Description                        | Pen-type thermometer.                                                                                                                                                       |  |
| Use                                | For measuring body temperature.                                                                                                                                             |                                                                                    |
| Clinical or User Specifications    | Electronic device for measuring body temperature by direct contact with skin or mucous membranes. Used for infants – the ear type will not fit in external auditory meatus. |                                                                                    |
| Accessories or Related Consumables | None.                                                                                                                                                                       |                                                                                    |
| Care                               | Standard cleaning and disinfection.<br>Replace battery(ies) with same model button-type cells, when prompted to do so by the battery indicator.                             |                                                                                    |
| Supplier Warranty                  | 2 years.                                                                                                                                                                    |                                                                                    |

## Torch: pupillary

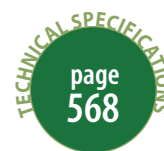

| Catalogue Number | Item Name        | Available on Transversal Contract | Contract Number or Code |
|------------------|------------------|-----------------------------------|-------------------------|
| PHC-E-121        | Torch: pupillary | No                                |                         |

|                                 |                                                                                                                                                                                              |                                                                                     |
|---------------------------------|----------------------------------------------------------------------------------------------------------------------------------------------------------------------------------------------|-------------------------------------------------------------------------------------|
| Description                     | A small durable battery-operated penlight, with a robust body and switch mechanism.                                                                                                          |  |
| Use                             | The penlight is used primarily for examining pupillary reflexes and the oral cavity, but also for transilluminating masses.                                                                  |                                                                                     |
| Clinical or User Specifications | Non-slip body.<br>Positive on-off switch.<br>Single source of uniform white light.<br>Splash-proof.                                                                                          |                                                                                     |
| Accessories/related consumables | Two sets of non-corrosive batteries.                                                                                                                                                         |                                                                                     |
| Care                            | Check batteries from time-to-time. Even non-corrosive batteries can leak after long periods.<br>If bulb burns out, replace the unit.<br>Clean with standard cleaning/disinfecting solutions. |                                                                                     |
| Supplier Warranty               | Warranted free of manufacturing defects for a 6-month period.                                                                                                                                |                                                                                     |

# Tuning fork

| Catalogue Number | Item Name       | Available on Transversal Contract | Contract Number or Code |
|------------------|-----------------|-----------------------------------|-------------------------|
| PHC-E-132        | Tuning fork set | No                                |                         |

|                                    |                                                                                                                                                                                                                                           |                                                                                    |
|------------------------------------|-------------------------------------------------------------------------------------------------------------------------------------------------------------------------------------------------------------------------------------------|------------------------------------------------------------------------------------|
| Description                        | Set of two tuning forks.                                                                                                                                                                                                                  |  |
| Use                                | Used to test hearing and vibration sense. Only one set is required in a PHC facility.                                                                                                                                                     |                                                                                    |
| Clinical or User Specifications    | The 256Hz fork is generally used for the Rinne, Weber and Schwabach tests of hearing.<br>The 128hz fork is preferable for the assessment of loss of vibration sense, e.g. in suspected diabetic or alcohol-related peripheral neuropathy. |                                                                                    |
| Accessories or Related Consumables | None.                                                                                                                                                                                                                                     |                                                                                    |
| Care                               | Standard cleaning and disinfection.                                                                                                                                                                                                       |                                                                                    |
| Supplier Warranty                  | None.                                                                                                                                                                                                                                     |                                                                                    |



## Examination light: ceiling-mounted

| Catalogue Number | Item Name                                                 | Available on Transversal Contract | Contract Number or Code |
|------------------|-----------------------------------------------------------|-----------------------------------|-------------------------|
| PHC-E-111        | Examination light: clinical, ceiling-mounted, directional | RT 2                              | 41111931-00002          |

|                                    |                                                                                                                                     |                                                                                      |
|------------------------------------|-------------------------------------------------------------------------------------------------------------------------------------|--------------------------------------------------------------------------------------|
| Description                        | A ceiling-mounted examination light.                                                                                                |  |
| Use                                | The unit is used to illuminate parts of the patient, during clinical examination. For use where a wall-mounted unit cannot be used. |                                                                                      |
| Clinical or User Specifications    | The unit can be positioned according to clinical need, and will maintain the desired position.                                      |                                                                                      |
| Accessories or Related Consumables | None.                                                                                                                               |                                                                                      |
| Care                               | Report immediately if unit malfunctions but power is available.<br>Standard cleaning and disinfection.                              |                                                                                      |
| Supplier Warranty                  | 5 years on all components.                                                                                                          |                                                                                      |

## Examination light: headlamp

| Catalogue Number | Item Name                   | Available on Transversal Contract | Contract Number or Code |
|------------------|-----------------------------|-----------------------------------|-------------------------|
| PHC-E-098        | Examination light: headlamp | No                                |                         |

|                                    |                                                                                                                                                                                                                                                                                                                                                                                                               |                                                                                     |
|------------------------------------|---------------------------------------------------------------------------------------------------------------------------------------------------------------------------------------------------------------------------------------------------------------------------------------------------------------------------------------------------------------------------------------------------------------|-------------------------------------------------------------------------------------|
| Description                        | A lightweight battery-operated light, worn on the forehead.                                                                                                                                                                                                                                                                                                                                                   |  |
| Use                                | Useful for hands-free illumination of an area of interest, during a clinical examination or simple procedure, or when mains power is unavailable.                                                                                                                                                                                                                                                             |                                                                                     |
| Clinical or User Specifications    | <p>Note: this is not a surgical headlamp – the light output is significantly lower.</p> <p>The lightweight lamp is mounted on an adjustable headband. The lamp is adjustable for tilt.</p> <p>Easy-access on-off switch on the lamp unit.</p> <p>Easy-access focusing ring on the lamp, to narrow or widen the beam of light.</p> <p>Belt-worn rechargeable Lithium-ion battery pack.</p>                     |                                                                                     |
| Accessories or Related Consumables | Charger, charge cable.                                                                                                                                                                                                                                                                                                                                                                                        |                                                                                     |
| Care                               | <p>Washable with standard detergents – do not immerse.</p> <p>Keep charged when not in use.</p> <p>Caution: This type of light maintains a constant light output until the battery level is drained to a certain point, then switches off suddenly to protect the battery. The light does not dim before switching off. Be aware of this possibility when item is being used as the sole source of light.</p> |                                                                                     |
| Supplier Warranty                  | 1 year (excluding deliberate or accidental damage).                                                                                                                                                                                                                                                                                                                                                           |                                                                                     |

# Examination light: mobile, without battery

| Catalogue Number | Item Name                                  | Available on Transversal Contract | Contract Number or Code |
|------------------|--------------------------------------------|-----------------------------------|-------------------------|
| PHC-E-154        | Examination light: mobile, without battery | RT 2-2016                         | 41111931-00004          |

|                                    |                                                                                                                                           |                                                                                      |
|------------------------------------|-------------------------------------------------------------------------------------------------------------------------------------------|--------------------------------------------------------------------------------------|
| Description                        | Examination light on castors without battery.                                                                                             |  |
| Use                                | Provides directional concentrated light for clinical examinations.                                                                        |                                                                                      |
| Clinical or User Specifications    | Bright LED light head.<br>Can be adjusted for optimal lighting position.<br>On a tilt-resistant base, with castors.<br>3meter power cord. |                                                                                      |
| Accessories or Related Consumables |                                                                                                                                           |                                                                                      |
| Care                               | Standard cleaning and disinfection.                                                                                                       |                                                                                      |
| Supplier Warranty                  | 5 years including LED light (excluding deliberate or accidental damage).                                                                  |                                                                                      |

# Examination light: wall-mounted

| Catalogue Number | Item Name                                              | Available on Transversal Contract | Contract Number or Code |
|------------------|--------------------------------------------------------|-----------------------------------|-------------------------|
| PHC-E-110        | Examination light: clinical, wall-mounted, directional | RT 2                              | 1111931-00005           |

|                                    |                                                                                                                                                                                                                                               |                                                                                     |
|------------------------------------|-----------------------------------------------------------------------------------------------------------------------------------------------------------------------------------------------------------------------------------------------|-------------------------------------------------------------------------------------|
| Description                        | A wall-mounted examination light.                                                                                                                                                                                                             |  |
| Use                                | The unit is used to illuminate parts of the patient, during clinical examination or procedures.                                                                                                                                               |                                                                                     |
| Clinical or User Specifications    | <p>Wall-mounted – cannot be misplaced. Must be mounted on the wall behind the examination couch, towards the head end of the couch.</p> <p>The unit can be positioned according to clinical need, and will maintain the desired position.</p> |                                                                                     |
| Accessories or Related Consumables | None.                                                                                                                                                                                                                                         |                                                                                     |
| Care                               | <p>Report immediately if unit malfunctions but power is available.</p> <p>Standard cleaning and disinfection.</p>                                                                                                                             |                                                                                     |
| Supplier Warranty                  | 5 years on all components.                                                                                                                                                                                                                    |                                                                                     |

# Tape: measuring

| Catalogue Number | Item Name                 | Available on Transversal Contract | Contract Number or Code |
|------------------|---------------------------|-----------------------------------|-------------------------|
| PHC-E-113        | Tape measure: tailor type | No                                |                         |

|                                    |                                                                                   |                                                                                     |
|------------------------------------|-----------------------------------------------------------------------------------|-------------------------------------------------------------------------------------|
| Description                        | Measuring tape.                                                                   |  |
| Use                                | Used for clinical measurements, e.g. waste-hip ratio.                             |                                                                                     |
| Clinical or User Specifications    | Non-stretch flexible tape.<br>Durable material.<br>Non-fade, non-smudge markings. |                                                                                     |
| Accessories or Related Consumables | None.                                                                             |                                                                                     |
| Care                               | Standard cleaning and disinfection.                                               |                                                                                     |
| Supplier Warranty                  | None.                                                                             |                                                                                     |

## Tape: MUAC

| Catalogue Number | Item Name                                | Available on Transversal Contract | Contract Number or Code |
|------------------|------------------------------------------|-----------------------------------|-------------------------|
| PHC-E-262        | Tape: Mid-Upper Arm Circumference, Child | No                                |                         |
| PHC-E-263        | Tape: Mid-Upper Arm Circumference, Adult | No                                |                         |

|                                    |                                                                                                                                                                                                                                                                                                                                                                                                                                                                                                                            |
|------------------------------------|----------------------------------------------------------------------------------------------------------------------------------------------------------------------------------------------------------------------------------------------------------------------------------------------------------------------------------------------------------------------------------------------------------------------------------------------------------------------------------------------------------------------------|
| Description                        | <p>A non-stretch vinyl tape, marked in millimetres, for measuring Mid-Upper Arm Circumference.</p>                                                                                                                                                                                                                                                                                                                                      |
| Use                                | <p>The tape is used for rapid nutritional assessment in children between 6 and 60 months old, and in adults (primarily pregnant women). Mid-Upper Arm Circumference is a stable proxy measurement for nutritional status.</p> <p>The tape is wrapped around the upper arm at the midpoint between the acromion and olecranon processes. The end of the tape is inserted through a slit in the tab-end, and adjusted for a close fit. The reading is taken from a window in the tab-end, at the printed alignment mark.</p> |
| Clinical or User Specifications    | <p>The child tape is colour-coded, showing the nutritional status as Good (green), marginal (yellow) or malnourished (red). The tape measures up to 265mm</p> <p>The adult tape is not colour-coded, and measures up to 500mm.</p> <p>Note that the tape should conform to the current WHO standard S0145620.</p>                                                                                                                                                                                                          |
| Accessories or Related Consumables | None.                                                                                                                                                                                                                                                                                                                                                                                                                                                                                                                      |
| Care                               | Standard cleaning and disinfection.                                                                                                                                                                                                                                                                                                                                                                                                                                                                                        |
| Supplier Warranty                  |                                                                                                                                                                                                                                                                                                                                                                                                                                                                                                                            |

# Urine collection

| Catalogue Number | Item Name          | Available on Transversal Contract | Contract Number or Code |
|------------------|--------------------|-----------------------------------|-------------------------|
| PHC-E-151        | Bedpan             | No                                |                         |
| PHC-E-158        | Urine jar or flask | No                                |                         |

|                                    |                                                                                                        |                                                                                     |
|------------------------------------|--------------------------------------------------------------------------------------------------------|-------------------------------------------------------------------------------------|
| Description                        | Receptacles for urine collection.                                                                      |  |
| Use                                | Urine collection for testing purposes.                                                                 |                                                                                     |
| Clinical or User Specifications    | Standard bedpans are provided for use by females.<br>Urine jars or flasks are provided for use by men. |                                                                                     |
| Accessories or Related Consumables | None.                                                                                                  |                                                                                     |
| Care                               | Standard cleaning and disinfection.<br>Autoclaveable.                                                  |                                                                                     |
| Supplier Warranty                  | 2 years (excluding deliberate or accidental damage).                                                   |                                                                                     |

# Specialised

## RESUSCITATION

### Automated external defibrillator

TECHNICAL SPECIFICATIONS  
page  
577

| Catalogue Number | Item Name                              | Available on Transversal Contract | Contract Number or Code |
|------------------|----------------------------------------|-----------------------------------|-------------------------|
| PHC-E-133        | Automated external defibrillator (AED) | RT 4                              | RT 4-05-072-A-ME        |

|                                 |                                                                                                                                                                                                                                                                                                                                                                                                                                                                                                                                              |                                                                                      |
|---------------------------------|----------------------------------------------------------------------------------------------------------------------------------------------------------------------------------------------------------------------------------------------------------------------------------------------------------------------------------------------------------------------------------------------------------------------------------------------------------------------------------------------------------------------------------------------|--------------------------------------------------------------------------------------|
| Description                     | <p>A self-contained device which is used in the resuscitation of a patient who has suffered cardiac arrest. It prompts the user with visual and audible instructions.</p>                                                                                                                                                                                                                                                                                                                                                                    |  |
| Use                             | <p>In a suspected cardiac arrest, two electrodes are applied to the patient's chest. The unit determines whether there is any cardiac electrical activity, and whether to deliver an electric pulse to restart the heart. If unsuccessful, it tells the user to deliver another pulse (or pulses) at a higher energy charge. A display shows any detected cardiac electrical activity.</p> <p>It can be used as a temporary cardiac monitor, while stabilizing or transporting the patient, by means of a separate three-lead ECG cable.</p> |                                                                                      |
| Clinical or User Specifications | <p>There are separate adult and child electrodes. The unit detects the electrode size, and modifies the electrical pulse accordingly.</p> <p>The unit can deliver approximately 50 shocks at 150 Joules, or about 2 hours of monitoring time.</p>                                                                                                                                                                                                                                                                                            |                                                                                      |



|                                    |                                                                                                                                                                                                                                                                                                                                                                                                                                                                                                                                                                                                                                                                                                                         |
|------------------------------------|-------------------------------------------------------------------------------------------------------------------------------------------------------------------------------------------------------------------------------------------------------------------------------------------------------------------------------------------------------------------------------------------------------------------------------------------------------------------------------------------------------------------------------------------------------------------------------------------------------------------------------------------------------------------------------------------------------------------------|
| Accessories or Related Consumables | <p>One 3-lead ECG cable with pouch RT 4-05-073-A-ME.</p> <p>One adult AED pacing pads set.</p> <p>One paediatric AED pacing pads set.</p> <p>Two rechargeable batteries RT 4-05-074-A-ME.</p> <p>Battery charger.</p> <p>One carrying case with shoulder strap for the case.</p> <p>One operation manual.</p> <p>One CD service manual.</p> <p>One in-service video.</p> <p>Replacement pads: adult PHC-C-174</p> <p>Replacement pads: paediatric PHC-C-175</p>                                                                                                                                                                                                                                                         |
| Care                               | <p>The unit is very robust, but should be handled with care. Keep the unit clean.</p> <p>The unit has a self-test feature, and should be tested preferably daily, but at least weekly. If the self-test fails, the supplier should be contacted immediately.</p> <p>A second battery is provided, and the batteries should be swapped on a regular basis, to prolong battery life. The battery which is out of the unit must also be kept charged, in case of emergency need.</p> <p>Order a replacement battery when indicated by the self-test.</p> <p>The electrodes have an expiry date.</p> <p>Order replacement electrodes before the expiry date.</p> <p>Note that there is a 45-day lead time for delivery.</p> |
| Supplier Warranty                  | <p>The batteries have a 2-year guarantee, but will eventually fail, and need to be replaced.</p> <p>The unit itself has an unconditional 2-year guarantee (excluding deliberate or accidental damage).</p> <p>The pads have a 2-year guarantee shelf life.</p>                                                                                                                                                                                                                                                                                                                                                                                                                                                          |

## Cardiac arrest board

| Catalogue Number | Item Name            | Available on Transversal Contract | Contract Number or Code |
|------------------|----------------------|-----------------------------------|-------------------------|
| PHC-E-134        | Cardiac arrest board | No                                |                         |

|                                    |                                                                                                                                                                                                                                                                                                                                                                                                                         |                                                                                     |
|------------------------------------|-------------------------------------------------------------------------------------------------------------------------------------------------------------------------------------------------------------------------------------------------------------------------------------------------------------------------------------------------------------------------------------------------------------------------|-------------------------------------------------------------------------------------|
| Description                        | Cardiac arrest board.                                                                                                                                                                                                                                                                                                                                                                                                   |  |
| Use                                | A board which is slipped under the thorax of a collapsed patient, to provide a stable rigid platform against which to perform chest compressions during resuscitation.                                                                                                                                                                                                                                                  |                                                                                     |
| Clinical or User Specifications    | The board is approximately 60cm by 40cm in size, can be made of rigid plastic or other rigid material, with a smooth finish to enable insertion under the chest of an unconscious patient. This is important to ensure the effectiveness of chest compression, if the patient happens to be on a soft surface such as a bed. Not required if patient is on a hard surface.<br>May have cut-outs to serve as hand grips. |                                                                                     |
| Accessories or Related Consumables |                                                                                                                                                                                                                                                                                                                                                                                                                         |                                                                                     |
| Care                               | Keep on or near the emergency trolley (most emergency trolleys have storage hooks or shelves for this purpose).<br>Standard cleaning and disinfection.                                                                                                                                                                                                                                                                  |                                                                                     |
| Supplier Warranty                  | 2 years (excluding deliberate or accidental damage).                                                                                                                                                                                                                                                                                                                                                                    |                                                                                     |

# Infant warmer: radiant

| Catalogue Number | Item Name                      | Available on Transversal Contract | Contract Number or Code |
|------------------|--------------------------------|-----------------------------------|-------------------------|
| PHC-E-190        | Infant warmer: radiant, mobile | RT2-2016                          | 42191811-00001          |

|                                    |                                                                                                                                                                                                                                                                                                                                                                                                                                                                             |                                                                                     |
|------------------------------------|-----------------------------------------------------------------------------------------------------------------------------------------------------------------------------------------------------------------------------------------------------------------------------------------------------------------------------------------------------------------------------------------------------------------------------------------------------------------------------|-------------------------------------------------------------------------------------|
| Description                        | <p>A unit comprising a nursing platform for neonates, with an overhead radiant warming system.</p>                                                                                                                                                                                                                                                                                                                                                                          |  |
| Use                                | <p>The unit is used for the care and resuscitation of neonates in distress. It provides a thermo-neutral environment for the neonate, while facilitating open access (different from an incubator). Thermal stability is necessary, particularly for premature or Low Birth Weight neonates.</p>                                                                                                                                                                            |                                                                                     |
| Clinical or User Specifications    | <p>Microprocessor-controlled temperature maintenance. Fail-safe protection against over-heating. Easy, one-touch controls.</p> <p>Fixed distance from heater grid to mattress. Heat focused on area within the bassinet.</p> <p>Bassinet can be tilted to Trendelenburg and Reverse-Trendelenburg positions.</p> <p>Manual and automatic alarms, for over/under temperature, probe disconnection, power disconnection.</p> <p>Temperature probe for precise monitoring.</p> |                                                                                     |
| Accessories or Related Consumables | <p>PHC-E-261 Infant warmer temperature probe.</p> <p>PHC-E-260 Infant warmer replacement mattress.</p>                                                                                                                                                                                                                                                                                                                                                                      |                                                                                     |
| Care                               | <p>This equipment must be purchased with a five-year maintenance plan. Service intervals as per supplier instructions. Supplier must provide on-site training as part of delivery and commissioning.</p>                                                                                                                                                                                                                                                                    |                                                                                     |
| Supplier Warranty                  | <p>2 years (excluding deliberate or accidental damage).</p>                                                                                                                                                                                                                                                                                                                                                                                                                 |                                                                                     |

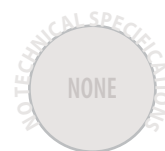

## Infant warmer: mattress

| Catalogue Number | Item Name                           | Available on Transversal Contract | Contract Number or Code |
|------------------|-------------------------------------|-----------------------------------|-------------------------|
| PHC-E-260        | Infant warmer: replacement mattress | RT2-2016                          | 42191814-00002          |

|                                    |                                                                                                                            |
|------------------------------------|----------------------------------------------------------------------------------------------------------------------------|
| Description                        | Reusable temperature probe, used with radiant infant warmer.                                                               |
| Use                                | The probe is used for precision monitoring of the air temperature in the neonate's environment.                            |
| Clinical or User Specifications    | Must monitor temperature with a precision of $<0.2^{\circ}\text{C}$ , to maintain temperature in the thermo-neutral range. |
| Accessories or Related Consumables |                                                                                                                            |
| Care                               | Standard cleaning and disinfection.                                                                                        |
| Supplier Warranty                  | 2 years (excluding deliberate or accidental damage).                                                                       |

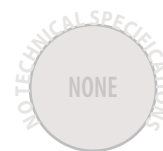

## Infant warmer: temperature probe

| Catalogue Number | Item Name                        | Available on Transversal Contract | Contract Number or Code |
|------------------|----------------------------------|-----------------------------------|-------------------------|
| PHC-E-261        | Infant warmer: temperature probe | RT2-2016                          | 42191814-00001          |

|                                    |                                                                                                                          |
|------------------------------------|--------------------------------------------------------------------------------------------------------------------------|
| Description                        | Reusable temperature probe, used with radiant infant warmer.                                                             |
| Use                                | The probe is used for precision monitoring of the air temperature in the neonate's environment.                          |
| Clinical or User Specifications    | Must monitor temperature with a precision of $<0.5^{\circ}\text{C}$ to maintain temperature in the thermo-neutral range. |
| Accessories or Related Consumables |                                                                                                                          |
| Care                               | Standard cleaning and disinfection.                                                                                      |
| Supplier Warranty                  | 2 years (excluding deliberate or accidental damage).                                                                     |

# Laryngoscope set

| Catalogue Number | Item Name                           | Available on Transversal Contract | Contract Number or Code |
|------------------|-------------------------------------|-----------------------------------|-------------------------|
| PHC-E-135        | Laryngoscope set for PHC facilities | No                                |                         |

|                                    |                                                                                                                                                                                                                                                                                                                                                                                                                                                                                                                                                                                                                 |                                                                                     |
|------------------------------------|-----------------------------------------------------------------------------------------------------------------------------------------------------------------------------------------------------------------------------------------------------------------------------------------------------------------------------------------------------------------------------------------------------------------------------------------------------------------------------------------------------------------------------------------------------------------------------------------------------------------|-------------------------------------------------------------------------------------|
| Description                        | Detachable-blade hand-held fibre-optic laryngoscope set, for endotracheal intubation.                                                                                                                                                                                                                                                                                                                                                                                                                                                                                                                           |  |
| Use                                | This instrument set is used when it is necessary to insert an endotracheal tube, to secure a patient's airway.                                                                                                                                                                                                                                                                                                                                                                                                                                                                                                  |                                                                                     |
| Clinical or User Specifications    | <p>Non-slip handle. Light source is built into the head of the handle. Bulb cannot unscrew and fall out during use. Fibre-optic light path built into each blade so that it cannot be removed or fall out. Blade is positively attached to handle in the closed position. Light turns on automatically when blade is extended into the operating position.</p> <p>The set consists of: 1 adult handle; 1 paediatric handle (may be optional); paediatric blade sizes 0, 1, straight fibre optic (Miller pattern), and 1,2,3,4,5 curved fibre-optic(Macintosh pattern). batteries are housed in the handles.</p> |                                                                                     |
| Accessories or Related Consumables | Spare bulb, spare set of batteries. Paediatric handle may be optional.                                                                                                                                                                                                                                                                                                                                                                                                                                                                                                                                          |                                                                                     |
| Care                               | <p>Normal care for stainless steel medical instruments.</p> <p>Check instrument operation daily.</p> <p>Remove and inspect batteries weekly.</p> <p>Although batteries are non-corrosive, they may still leak after an extended period.</p> <p>Replace bulb if instrument does not light up and batteries are good.</p>                                                                                                                                                                                                                                                                                         |                                                                                     |
| Supplier Warranty                  | 5-year guarantee on handles, blades, hook-on mechanism and switches. At least 2-year guarantee on light bulb (excluding deliberate or accidental damage).                                                                                                                                                                                                                                                                                                                                                                                                                                                       |                                                                                     |

# Monitor: multi-function vital signs, including SpO<sub>2</sub>

| Catalogue Number | Item Name                                                       | Available on Transversal Contract | Contract Number or Code |
|------------------|-----------------------------------------------------------------|-----------------------------------|-------------------------|
| PHC-E-136        | Monitor: multi-function vital signs, including SpO <sub>2</sub> | RT 4-2015                         | RT 4-05-030 ME          |

|                                    |                                                                                                                                                                                                                                                                                                                                                                                                                                                                                                                                                                                                                                                                                                                                                                               |                                                                                     |
|------------------------------------|-------------------------------------------------------------------------------------------------------------------------------------------------------------------------------------------------------------------------------------------------------------------------------------------------------------------------------------------------------------------------------------------------------------------------------------------------------------------------------------------------------------------------------------------------------------------------------------------------------------------------------------------------------------------------------------------------------------------------------------------------------------------------------|-------------------------------------------------------------------------------------|
| Description                        | <p>This is an automated electronic device for monitoring vital signs in an emergency setting. The unit monitors pulse, blood pressure, SpO<sub>2</sub> and optionally temperature and the ECG.</p>                                                                                                                                                                                                                                                                                                                                                                                                                                                                                                                                                                            |  |
| Use                                | <p>The unit is typically used in a resuscitation situation, where continuous monitoring of vital signs is needed. It is usually mounted on the wall or on an emergency trolley.</p>                                                                                                                                                                                                                                                                                                                                                                                                                                                                                                                                                                                           |                                                                                     |
| Clinical or User Specifications    | <p>The unit operates automatically, once switched on and connected to the patient. Measurements are repeated at pre-set intervals – usually at a standard setting, which does not require changing under normal circumstances. Measurements are stored for later review.</p> <p>The pulse can be indicated by an audible beep tone, so that the user is not constrained while performing resuscitation.</p> <p>The unit has a built-in battery and charger, and can be detached from its normal mounting position, if required for continuous monitoring of a patient who is being transported.</p> <p>The battery permits sustained monitoring in case of a power failure.</p> <p>Supplier is responsible for delivery, commissioning (including mounting) and training.</p> |                                                                                     |
| Accessories or Related Consumables | <p>Supplied with patient cables, sensors, power cable, cuffs (large adult, adult child, neonate, disposable self-adhesive monitoring pads).</p> <p>ECG electrodes: disposable, self-adhesive, for resting ECG. PHC-C-212.</p>                                                                                                                                                                                                                                                                                                                                                                                                                                                                                                                                                 |                                                                                     |
| Care                               | <p>Although the instrument specified has been designed for mobile use, it will be damaged by dropping or careless use. Do not unmount unless absolutely necessary.</p> <p>The unit has a self-test routine on start-up – test daily. In case of failure, contact supplier immediately.</p> <p>Clean with standard cleaning/anti-infective solutions. Cuffs and cuff covers are washable and disinfectable.</p> <p>Check cables and air tubing for wear and damage. Order replacements if worn.</p> <p>Keep plugged in at all times.</p>                                                                                                                                                                                                                                       |                                                                                     |
| Maintenance                        | <p>The unit must be calibrated at least annually, by technical personnel of the department or the supplier.</p> <p>Internal battery must be replaced when prompted to do so by the battery indicator. Contact technical personnel of the department or the supplier.</p>                                                                                                                                                                                                                                                                                                                                                                                                                                                                                                      |                                                                                     |
| Supplier Warranty                  | <p>3 years on all parts (including cuffs and cuff covers) except battery (excluding deliberate or accidental damage).</p>                                                                                                                                                                                                                                                                                                                                                                                                                                                                                                                                                                                                                                                     |                                                                                     |

# Nebuliser

| Catalogue Number | Item Name | Available on Transversal Contract | Contract Number or Code |
|------------------|-----------|-----------------------------------|-------------------------|
| PHC-E-137        | Nebuliser | No                                |                         |

|                                    |                                                                                                                                                                                                                                             |                                                                                     |
|------------------------------------|---------------------------------------------------------------------------------------------------------------------------------------------------------------------------------------------------------------------------------------------|-------------------------------------------------------------------------------------|
| Description                        | Nebuliser.                                                                                                                                                                                                                                  |  |
| Use                                | An electrical device to generate a stream of aerosol mist for drug delivery for treatment of chronic or acute pulmonary disease.                                                                                                            |                                                                                     |
| Clinical or User Specifications    | The nebuliser is used to deliver moisturised air via a face mask. The nebulisation chamber converts medication into micron-sized particles, for delivery into the airways via the nebulised air stream. Powered by 220V. mains electricity. |                                                                                     |
| Accessories or Related Consumables | Mask: oxygen (diluter type) adult PHC-C-108.<br>Mask: oxygen (diluter type) paediatric PHC-C-107.                                                                                                                                           |                                                                                     |
| Care                               | Standard cleaning and disinfection.                                                                                                                                                                                                         |                                                                                     |
| Supplier Warranty                  | 2 years (excluding deliberate or accidental damage).                                                                                                                                                                                        |                                                                                     |



# Oxygen regulator with flow-meter

| Catalogue Number | Item Name                        | Available on Transversal Contract | Contract Number or Code |
|------------------|----------------------------------|-----------------------------------|-------------------------|
| PHC-E-138        | Oxygen regulator with flow-meter | No                                |                         |

|                                    |                                                                                                                                                                                                                                                                                                                                                                                                                |                                                                                     |
|------------------------------------|----------------------------------------------------------------------------------------------------------------------------------------------------------------------------------------------------------------------------------------------------------------------------------------------------------------------------------------------------------------------------------------------------------------|-------------------------------------------------------------------------------------|
| Description                        | Oxygen regulator with flow-meter.                                                                                                                                                                                                                                                                                                                                                                              |  |
| Use                                | <p>This item controls the pressure at which oxygen is released from a cylinder, and also permits the flow rate of the released oxygen to be adjusted to clinical needs.</p> <p>Connects directly to an oxygen cylinder, has connection point for oxygen mask or tubing.</p>                                                                                                                                    |                                                                                     |
| Clinical or User Specifications    | <p>The regulator has a standard bullnose fitting for connection to common sizes of oxygen cylinder.</p> <p>The regulator has a pre-set delivery pressure.</p> <p>An oxygen mask can be connected directly to the output of the flowmeter. Alternately, a length of oxygen tubing can be connected to the flowmeter, for a longer reach.</p> <p>The flowmeter can be set to the required litres per minute.</p> |                                                                                     |
| Accessories or Related Consumables | None.                                                                                                                                                                                                                                                                                                                                                                                                          |                                                                                     |
| Care                               | Standard cleaning and disinfection.                                                                                                                                                                                                                                                                                                                                                                            |                                                                                     |
| Supplier Warranty                  | 5 years on needle valve, 10 years on valve body and flowmeter (excluding deliberate or accidental damage).                                                                                                                                                                                                                                                                                                     |                                                                                     |

## Resuscitators: manual

TECHNICAL SPECIFICATIONS  
pages  
589  
to 592

| Catalogue Number | Item Name                    | Available on Transversal Contract | Contract Number or Code |
|------------------|------------------------------|-----------------------------------|-------------------------|
| PHC-E-140        | Resuscitator: infant, manual | RT 4                              | RT 4-05-026 ME          |
| PHC-E-141        | Resuscitator: child, manual  | RT 4                              | RT 4-05-025 ME          |
| PHC-E-142        | Resuscitator: adult, manual  | RT 4                              | RT 4-05-024 ME          |
| PHC-E-143        | PEEP valve                   | RT 4                              | RT 4-05-027 ME          |

|                                    |                                                                                                                                                                                                                                                                                                                                                                                                          |                                                                                     |
|------------------------------------|----------------------------------------------------------------------------------------------------------------------------------------------------------------------------------------------------------------------------------------------------------------------------------------------------------------------------------------------------------------------------------------------------------|-------------------------------------------------------------------------------------|
| Description                        | Set of manual resuscitators.                                                                                                                                                                                                                                                                                                                                                                             |  |
| Use                                | <p>For assisted ventilation of a collapsed patient.</p> <p>The infant resuscitator is used to ventilate premature neonates and infants, &lt;4kg.</p>                                                                                                                                                                                                                                                     |                                                                                     |
| Clinical or User Specifications    | <p>Can be operated with single hand. Self-re-expanding bag.</p> <p>Inlet for supplementary oxygen.</p> <p>Clear face masks. Can be used with PEEP valve, which has adjustable pressure.</p> <p>Mask sizes 00,0 and 1 to be supplied with infant resuscitator.</p> <p>Mask sizes 1, 2 and 3 to be supplied with child resuscitator.</p> <p>Mask sizes 4 and 5 to be supplied with adult resuscitator.</p> |                                                                                     |
| Accessories or Related Consumables | Supplied in a soft carrying case made of durable, washable material with appropriate carrying straps.                                                                                                                                                                                                                                                                                                    |                                                                                     |
| Care                               | <p>Standard cleaning and disinfecting.</p> <p>PEEP valve is autoclaveable.</p>                                                                                                                                                                                                                                                                                                                           |                                                                                     |
| Supplier Warranty                  | 2 years (excluding deliberate or accidental damage).                                                                                                                                                                                                                                                                                                                                                     |                                                                                     |

# Suction machine: portable

| Catalogue Number | Item Name                 | Available on Transversal Contract | Contract Number or Code |
|------------------|---------------------------|-----------------------------------|-------------------------|
| PHC-E-146        | Suction machine: portable | RT 4-2015                         | RT 4-05-041 ME          |

|                                    |                                                                                                                                                                                                            |                                                                                     |
|------------------------------------|------------------------------------------------------------------------------------------------------------------------------------------------------------------------------------------------------------|-------------------------------------------------------------------------------------|
| Description                        | Suction machine: portable.                                                                                                                                                                                 |  |
| Use                                | To be used during resuscitation.<br>Suitable for PHC clinics.                                                                                                                                              |                                                                                     |
| Clinical or User Specifications    | Mobile suction device. Mains operated, with built-in battery and charger. 1 hour operation on full battery charge.<br>Castor-mounted. Two receiver jars (2l each).                                         |                                                                                     |
| Accessories or Related Consumables | Supplied with re-usable, autoclaveable suction tube and cannula.<br>Filter: antibacterial. PHC-C-162.                                                                                                      |                                                                                     |
| Care                               | Standard cleaning and disinfecting.<br>Suction tube and cannula must be cleaned and autoclaved after use.<br>Receiver jars and lids autoclaveable.<br>Replace hydrophobic bacterial filter after each use. |                                                                                     |
| Maintenance                        | Must be serviced annually by departmental or supplier technical personnel.                                                                                                                                 |                                                                                     |
| Supplier Warranty                  | 2 years (excluding deliberate or accidental damage).                                                                                                                                                       |                                                                                     |

## Suction machine: trolley type

| Catalogue Number | Item Name                     | Available on Transversal Contract | Contract Number or Code |
|------------------|-------------------------------|-----------------------------------|-------------------------|
| PHC-E-144        | Suction machine: trolley type | RT 2-2016                         | 42171801-00002          |

|                                    |                                                                                                                                                                                                                         |                                                                                     |
|------------------------------------|-------------------------------------------------------------------------------------------------------------------------------------------------------------------------------------------------------------------------|-------------------------------------------------------------------------------------|
| Description                        | Suction, mobile.                                                                                                                                                                                                        |  |
| Use                                | To be used during resuscitation.<br>For use in CHCs                                                                                                                                                                     |                                                                                     |
| Clinical or User Specifications    | Suction device. Mains operated, with built-in re-chargeable battery and charger. 1 hour operation on full battery charge.<br>Mounted on a mobile stand with 4 castor wheels, two lockable. Two receiver jars (2l each). |                                                                                     |
| Accessories or Related Consumables | Supplied with re-usable, autoclaveable suction tube and cannula.<br>Filter: antibacterial. PHC-C-161.                                                                                                                   |                                                                                     |
| Care                               | Standard cleaning and disinfecting.<br>Receiver jars and lids autoclaveable.<br>Replace hydrophobic bacterial filter after each use.                                                                                    |                                                                                     |
| Maintenance                        | Must be serviced annually by departmental or supplier technical personnel.                                                                                                                                              |                                                                                     |
| Supplier Warranty                  | 2 years (excluding deliberate or accidental damage).                                                                                                                                                                    |                                                                                     |

# Tape: Broselow

| Catalogue Number | Item Name     | Available on Transversal Contract | Contract Number or Code |
|------------------|---------------|-----------------------------------|-------------------------|
| PHC-E-128        | Broselow tape | RT 4                              | RT 4-05-010 ME          |

|                                    |                                                                                                                                                                                                                                                                                                                                                                                                                                                                                                                                                                                                                                                                                                                                    |                                                                                     |
|------------------------------------|------------------------------------------------------------------------------------------------------------------------------------------------------------------------------------------------------------------------------------------------------------------------------------------------------------------------------------------------------------------------------------------------------------------------------------------------------------------------------------------------------------------------------------------------------------------------------------------------------------------------------------------------------------------------------------------------------------------------------------|-------------------------------------------------------------------------------------|
| Description                        | <p>A printed tape, showing recommended dosages of resuscitation drugs and defibrillation energy for use in infants, where the weight is unknown.</p>                                                                                                                                                                                                                                                                                                                                                                                                                                                                                                                                                                               |  |
| Use                                | Used in resuscitation settings, where there is no time to weigh the infant.                                                                                                                                                                                                                                                                                                                                                                                                                                                                                                                                                                                                                                                        |                                                                                     |
| Clinical or User Specifications    | <p>The tape is used to measure the length of the infant, and converts infant length into calculated weight, when there is no time to weigh the infant. The measured length on the tape will fall into a particular range. Each range is colour-coded, with subdivisions for larger or smaller infants within that length range.</p> <p>Each colour – coded zone has recommended dosages of resuscitation drugs and defibrillation energy for use in infants of the calculated weight.</p> <p>The use of the tape can be extended further by using pre-packed containers, matching each colour code, having all the equipment and drugs associated with that colour code (e.g. endotracheal tube size, drugs in correct mg/kg).</p> |                                                                                     |
| Accessories or Related Consumables | Clear plastic storage pouch.                                                                                                                                                                                                                                                                                                                                                                                                                                                                                                                                                                                                                                                                                                       |                                                                                     |
| Care                               | <p>Standard cleaning and disinfection.</p> <p>Note that most of these tapes are made of coated paper – Do not soak.</p>                                                                                                                                                                                                                                                                                                                                                                                                                                                                                                                                                                                                            |                                                                                     |
| Supplier Warranty                  | None.                                                                                                                                                                                                                                                                                                                                                                                                                                                                                                                                                                                                                                                                                                                              |                                                                                     |

## Tape: PAWPER and flipper chart

| Catalogue Number | Item Name             | Available on Transversal Contract | Contract Number or Code |
|------------------|-----------------------|-----------------------------------|-------------------------|
| PHC-E-129        | PAWPER Tape and chart | No                                |                         |

|                                    |                                                                                                                                                                                                                                                                                                                                                                                                                                                                                                                                                                                                                                                                                                                              |                                                                                     |
|------------------------------------|------------------------------------------------------------------------------------------------------------------------------------------------------------------------------------------------------------------------------------------------------------------------------------------------------------------------------------------------------------------------------------------------------------------------------------------------------------------------------------------------------------------------------------------------------------------------------------------------------------------------------------------------------------------------------------------------------------------------------|-------------------------------------------------------------------------------------|
| Description                        | <p>The Paediatric Advanced Weight Prediction in the Emergency Room (PAWPER) tape, is a printed tape, showing recommended dosages of resuscitation drugs and defibrillation energy for use in infants, where the weight is unknown.</p>                                                                                                                                                                                                                                                                                                                                                                                                                                                                                       |  |
| Use                                | Used in resuscitation settings, where there is no time to weigh the infant.                                                                                                                                                                                                                                                                                                                                                                                                                                                                                                                                                                                                                                                  |                                                                                     |
| Clinical or User Specifications    | <p>The tape is used to measure the length of the infant, and converts infant length into calculated weight, when there is no time to weigh the infant. The measured length on the tape will fall into a particular range. Each range is colour-coded, with subdivisions for larger or smaller infants within that length range.</p> <p>Each colour – coded zone has recommended dosages of resuscitation drugs and defibrillation energy for use in infants of the calculated weight. These are shown on the accompanying flipper chart.</p> <p>The PAWPER tape formula for conversion of length to weight, has been shown in published studies to be more accurate than the Broselow Tape in the South African setting.</p> |                                                                                     |
| Accessories or Related Consumables | Supplied as a set of four tapes and one flipper chart.                                                                                                                                                                                                                                                                                                                                                                                                                                                                                                                                                                                                                                                                       |                                                                                     |
| Care                               | <p>Standard cleaning and disinfection.</p> <p>Note that most of these tapes are made of coated paper – Do not soak.</p>                                                                                                                                                                                                                                                                                                                                                                                                                                                                                                                                                                                                      |                                                                                     |
| Supplier Warranty                  | None.                                                                                                                                                                                                                                                                                                                                                                                                                                                                                                                                                                                                                                                                                                                        |                                                                                     |

# POINT OF CARE TESTING

## Glucometer

| Catalogue Number | Item Name  | Available on Transversal Contract | Contract Number or Code |
|------------------|------------|-----------------------------------|-------------------------|
| PHC-E-149        | Glucometer | No                                |                         |

|                                    |                                                                                                                                                                                                                                                             |                                                                                     |
|------------------------------------|-------------------------------------------------------------------------------------------------------------------------------------------------------------------------------------------------------------------------------------------------------------|-------------------------------------------------------------------------------------|
| Description                        | Portable, handheld blood glucose meter.                                                                                                                                                                                                                     |  |
| Use                                | For rapid measurement of glucose level from finger-prick sample.                                                                                                                                                                                            |                                                                                     |
| Clinical or User Specifications    | Battery operated.<br>Measures blood glucose by reading the colour changes on the instrument's disposable test strip.<br>Records reading in memory.                                                                                                          |                                                                                     |
| Accessories or Related Consumables | One pack of glucometer test strips PHC-C-181.<br>One pack of multipurpose lancets PHC-C-146.                                                                                                                                                                |                                                                                     |
| Care                               | Replace batteries if prompted to do so by the "battery low" indicator.<br>These types of devices have been shown to facilitate the transmission of blood-borne diseases in a multi-user environment. Follow manufacturer's cleaning instructions carefully. |                                                                                     |
| Supplier Warranty                  | 2 years (excluding deliberate or accidental damage).                                                                                                                                                                                                        |                                                                                     |

# Haemoglobinometer

| Catalogue Number | Item Name         | Available on Transversal Contract | Contract Number or Code |
|------------------|-------------------|-----------------------------------|-------------------------|
| PHC-E-152        | Haemoglobinometer | No                                |                         |

|                                    |                                                                                                                                                                                                                                                                                                                                           |                                                                                     |
|------------------------------------|-------------------------------------------------------------------------------------------------------------------------------------------------------------------------------------------------------------------------------------------------------------------------------------------------------------------------------------------|-------------------------------------------------------------------------------------|
| Description                        | Electronic meter to measure blood haemoglobin level.                                                                                                                                                                                                                                                                                      |  |
| Use                                | For rapid measurement of haemoglobin level from finger-prick sample.                                                                                                                                                                                                                                                                      |                                                                                     |
| Clinical or User Specifications    | <p>Battery-powered handheld meter (rechargeable or replaceable batteries, depending on model procured).</p> <p>Uses either a micro-cuvette or a test strip (depending on model procured).</p> <p>Capillary blood specimen (using standard lancets).</p> <p>Display reads haemoglobin level out directly.</p>                              |                                                                                     |
| Accessories or Related Consumables | <p>Lancets, multipurpose PHC-C-146.</p> <p>Hb meter test strips PHC-C-182.</p> <p>Hb meter microcuvette PHC-C-183. (Depending on the model procured.)</p>                                                                                                                                                                                 |                                                                                     |
| Care                               | <p>Replace/recharge batteries if prompted to do so by the “battery low” indicator.</p> <p>These types of devices have been shown to facilitate the transmission of blood-borne diseases in a multi-user environment. Follow manufacturer’s cleaning instructions carefully.</p> <p>Biosafety waste disposal containers are mandatory.</p> |                                                                                     |
| Maintenance                        | This unit must be recalibrated at least annually. Contact departmental or supplier technical personnel.                                                                                                                                                                                                                                   |                                                                                     |
| Supplier Warranty                  | 2-year shelf life.                                                                                                                                                                                                                                                                                                                        |                                                                                     |



# STERILISATION

## Autoclave: tabletop

TECHNICAL SPECIFICATIONS  
page  
601

| Catalogue Number | Item Name           | Available on Transversal Contract | Contract Number or Code |
|------------------|---------------------|-----------------------------------|-------------------------|
| PHC-E-157        | Autoclave: tabletop | No                                |                         |

|             |                                                                                                                                                                                                                                                                                                                                                                                                                                                                                                                                                                                                                                                                                                                                                                                                                                                                                                                                                                                                                                                                                                                                                                                                                                                                                                                                                                                                                                                                                   |                                                                                      |
|-------------|-----------------------------------------------------------------------------------------------------------------------------------------------------------------------------------------------------------------------------------------------------------------------------------------------------------------------------------------------------------------------------------------------------------------------------------------------------------------------------------------------------------------------------------------------------------------------------------------------------------------------------------------------------------------------------------------------------------------------------------------------------------------------------------------------------------------------------------------------------------------------------------------------------------------------------------------------------------------------------------------------------------------------------------------------------------------------------------------------------------------------------------------------------------------------------------------------------------------------------------------------------------------------------------------------------------------------------------------------------------------------------------------------------------------------------------------------------------------------------------|--------------------------------------------------------------------------------------|
| Description | <p>A medium-sized tabletop automatic autoclave. The autoclave operates on the following general cycle: while water is being heated into steam, air is sucked out of the sterilisation chamber. Steam is then introduced into the chamber under pressure (to keep the temperature above boiling point). The steam penetrates textiles and wrappings because of the alternating vacuum and pressure. As steam condenses, it forms moisture and gives off heat, which is very effective at heat transfer to the objects to be sterilised. The temperature and pressure are maintained for a pre-determined period. Thereafter, the steam is released, and there is a drying (and cooling) cycle. The cycles vary in time and temperature, depending on the load to be sterilised. A display panel shows temperature, pressure, type of cycle, stage of cycle, and any alarm conditions.</p>                                                                                                                                                                                                                                                                                                                                                                                                                                                                                                                                                                                          |  |
| Use         | <p>This size of autoclave is suitable for a larger clinic, or a Community Health Centre with an MOU. This autoclave can sterilise all types of loads. Although it has numerous safety features, care is still necessary because of the steam and very high temperatures generated.</p> <p>Depending on the model selected, de-ionised water may be required – follow the manufacturer's instructions carefully.</p> <p>The autoclave requires periodic testing for temperature and pressure and leakage. There are specific test protocols to carry these out, and the machine has pre-programmed test cycles. A prion cycle is available if required by the SOP</p> <p>The tests should be carried out regularly as per SOP, to maintain confidence in the sterilisation process.</p> <p>The following are general guidelines for use:</p> <ol style="list-style-type: none"> <li>Clean the drain strainer before loading.</li> <li>Do not load non-autoclaveable items. Place items so that the steam can get to them.</li> <li>Do not place autoclaveable glass directly in contact with metal surfaces – use a heat-resistant plastic tray.</li> <li>The autoclave uses water and power, irrespective of load. Therefore utilise the full space.</li> <li>Clean and dry items before placing in the autoclave, especially if in a pack.</li> <li>Arrange loads according to cycle type, i.e. do not mix liquids and instruments, as they require different cycles.</li> </ol> |                                                                                      |

|                                    |                                                                                                                                                                                                                                                                                                                                                                                                                                                                                                                                                                                                                                                                                                                                                                                                                                                                                                                                                                                                                                                                                                                                                                           |
|------------------------------------|---------------------------------------------------------------------------------------------------------------------------------------------------------------------------------------------------------------------------------------------------------------------------------------------------------------------------------------------------------------------------------------------------------------------------------------------------------------------------------------------------------------------------------------------------------------------------------------------------------------------------------------------------------------------------------------------------------------------------------------------------------------------------------------------------------------------------------------------------------------------------------------------------------------------------------------------------------------------------------------------------------------------------------------------------------------------------------------------------------------------------------------------------------------------------|
|                                    | <ul style="list-style-type: none"> <li>g. The autoclave has an interlock, to prevent the door from opening while it is still under pressure and the temperature is high. ONCE THE DOOR CAN BE OPENED, CAUTION IS STILL REQUIRED – THE AIR AND ITEMS INSIDE MAY STILL BE EXTREMELY HOT.</li> <li>h. Wait at least 30 seconds before reaching, or looking into the autoclave, after opening the door.</li> <li>i. Wait 5 minutes before removing the load.</li> <li>j. Use personal protection when removing items from the autoclave.</li> </ul> <p>The autoclave can store the data for the last 20 cycles. The data can be downloaded to a computer for review or filing. If the optional printer is purchased, the data can be printed directly.</p>                                                                                                                                                                                                                                                                                                                                                                                                                    |
| Clinical or User Specifications    | <p>Pre-set programmes for the following:</p> <ul style="list-style-type: none"> <li>Wrapped dry goods (Linen, Gowns) – 134°C</li> <li>Wrapped or pouched hard goods (Instruments – solid and hollow) – 134°C</li> <li>Unwrapped hard goods – 134°C</li> <li>Plastics – 105°C.</li> <li>Fluids or rubber goods – 121°C</li> <li>Flash cycle – 134°C</li> <li>Porous items.</li> </ul> <p>Alarms for all types of malfunction: temperature, pressure, water supply, interrupted cycle.</p>                                                                                                                                                                                                                                                                                                                                                                                                                                                                                                                                                                                                                                                                                  |
| Accessories or Related Consumables | <p>Spare door seal.</p> <p>Perforated sterilising trays (at least three), long enough to house maternity instruments.</p> <p>Pack of Bowie-Dick test packs. PHC-C-213</p> <p>Helix test kit with pack of strips. PHC-C-214.</p>                                                                                                                                                                                                                                                                                                                                                                                                                                                                                                                                                                                                                                                                                                                                                                                                                                                                                                                                           |
| Care                               | <p>Observe water quality requirements.</p> <p>Ensure drainage after daily use.</p> <p><b>Testing</b></p> <p>This should be carried out at least weekly, but more frequently if the SOP requires it.</p> <p><b>Bowie-Dick test:</b> a test pack (and nothing else) is placed over the drain outlet, and the Bowie-Dick cycle is run on the autoclave. If the thermochromatic paper at the core of the pack does not change colour completely, the test has failed. Maintenance personnel should be summoned.</p> <p><b>Leak test:</b> run this cycle with an empty autoclave. The cycle develops the usual operating vacuum, and then monitors the vacuum over a period of 15 minutes. If there is a leak, the vacuum will decrease more rapidly than allowed. If this test fails, summon maintenance personnel, and change the door seal.</p> <p><b>Helix test:</b> uses the same cycle as the Bowie-dick, but a test strip is placed inside a deep, catheter-like receptacle. This tests steam penetration inside deep hollow instruments, and should be carried out if such instruments are used in the facility. If this test fails, summon maintenance personnel.</p> |
| Maintenance                        | <p>The autoclave is supplied with a full maintenance contract, for 5 years. The supplier will provide a schedule of preventative and planned maintenance.</p>                                                                                                                                                                                                                                                                                                                                                                                                                                                                                                                                                                                                                                                                                                                                                                                                                                                                                                                                                                                                             |
| Supplier Warranty                  | <p>2 year guarantee (excluding deliberate or accidental damage)</p> <p>Vacuum pump guaranteed for 5 years</p> <p>Heating elements guaranteed for 10 years</p>                                                                                                                                                                                                                                                                                                                                                                                                                                                                                                                                                                                                                                                                                                                                                                                                                                                                                                                                                                                                             |

# Instrument steriliser: desktop

| Catalogue Number | Item Name                      | Available on Transversal Contract | Contract Number or Code |
|------------------|--------------------------------|-----------------------------------|-------------------------|
| PHC-E-112        | Instrument steriliser: desktop | No                                |                         |

|                                    |                                                                                                                                                                                                                                                                                                                |                                                                                     |
|------------------------------------|----------------------------------------------------------------------------------------------------------------------------------------------------------------------------------------------------------------------------------------------------------------------------------------------------------------|-------------------------------------------------------------------------------------|
| Description                        | <p>Desktop instrument sterilising autoclave.<br/>For smaller PHC facilities.</p>                                                                                                                                                                                                                               |  |
| Use                                | Primary use is to sterilise dental instruments and other small instruments at PHC level.                                                                                                                                                                                                                       |                                                                                     |
| Clinical or User Specifications    | <p>22l capacity.<br/>Can autoclave solid, porous, hollow, packed and unpacked items.<br/>Prion cycle available.<br/>Simple 2-step start.<br/>Automatic stop at end of cycle.<br/>Does not affect the temper of steel instruments.<br/>Negative pressure drying cycle.<br/>Self-test, checks water quality.</p> |                                                                                     |
| Accessories or Related Consumables | <p>Spare door seal.<br/>Perforated sterilising trays (at least three), long enough to house maternity instruments.<br/>Pack of Bowie-Dick test packs. PHC-C-213<br/>Helix test kit with pack of strips. PHC-C-214.<br/>Observe water quality requirements.<br/>Ensure drainage after daily use.</p>            |                                                                                     |

|                   |                                                                                                                                                                                                                                                                                                                                                                                                                                                                                                                                                                                                                                                                                                                                                                                                                                                                                                                                                                                                                                                                                                                                                                                                                                                      |
|-------------------|------------------------------------------------------------------------------------------------------------------------------------------------------------------------------------------------------------------------------------------------------------------------------------------------------------------------------------------------------------------------------------------------------------------------------------------------------------------------------------------------------------------------------------------------------------------------------------------------------------------------------------------------------------------------------------------------------------------------------------------------------------------------------------------------------------------------------------------------------------------------------------------------------------------------------------------------------------------------------------------------------------------------------------------------------------------------------------------------------------------------------------------------------------------------------------------------------------------------------------------------------|
|                   | <p><b>Testing</b></p> <p>This should be carried out at least weekly, but more frequently if the SOP requires it.</p> <p><b>Bowie-Dick test:</b> a test pack (and nothing else) is placed over the drain outlet, and the Bowie-Dick cycle is run on the autoclave. If the thermochromatic paper at the core of the pack does not change colour completely, the test has failed. Maintenance personnel should be summoned.</p> <p><b>Leak test:</b> run this cycle with an empty autoclave. The cycle develops the usual operating vacuum, and then monitors the vacuum over a period of 15 minutes. If there is a leak, the vacuum will decrease more rapidly than allowed. If this test fails, summon maintenance personnel, and change the door seal.</p> <p><b>Helix test:</b> uses the same cycle as the Bowie-dick, but a test strip is placed inside a deep, catheter-like receptacle. This tests steam penetration inside deep hollow instruments, and should be carried out if such instruments are used in the facility. If this test fails, summon maintenance personnel.</p> <p>The autoclave is supplied with a full maintenance contract, for 5 years. The supplier will provide a schedule of preventative and planned maintenance.</p> |
| Care              | <p>Report immediately if unit malfunctions but power is available.</p> <p>Standard cleaning and disinfection.</p>                                                                                                                                                                                                                                                                                                                                                                                                                                                                                                                                                                                                                                                                                                                                                                                                                                                                                                                                                                                                                                                                                                                                    |
| Supplier Warranty | <p>5 years complete service and maintenance contract.</p>                                                                                                                                                                                                                                                                                                                                                                                                                                                                                                                                                                                                                                                                                                                                                                                                                                                                                                                                                                                                                                                                                                                                                                                            |

# ORAL HEALTH

- This is a compendium of equipment required to set up a new dental surgery. Some of the items listed, may not be suitable as replacements for older, existing equipment, because of compatibility issues. Replacements should be found on the Treasury term contract. A suitably qualified professional should be consulted before orders are finalised.
- For certain items, the final choice depends on environmental factors, such as availability of power and water. Alternatives are indicated, but a suitably qualified professional should be consulted before orders are finalised.
- The dental units referenced here, are supplied complete with handpieces. Handpieces are also listed separately for replacement purposes, but the choice has been limited to non-fibre-optic, stainless steel body types. Other types will be available on the term contract.
- In all cases, reference should be made to the Treasury term contract in force at the time.

## Amalgam separator: 2 surgeries

TECHNICAL SPECIFICATIONS  
page  
608

| Catalogue Number | Item Name                      | Available on Transversal Contract | Contract Number or Code |
|------------------|--------------------------------|-----------------------------------|-------------------------|
| PHC-E-164        | Amalgam separator: 2 surgeries | In preparation                    |                         |

|                                    |                                                                                                                                                                         |
|------------------------------------|-------------------------------------------------------------------------------------------------------------------------------------------------------------------------|
| Description                        | A fixed-installation amalgam separator.                                                                                                                                 |
| Use                                | Extracts amalgam from waste water from the dental unit and cuspidor, to prevent mercury from contaminating the local water supply.                                      |
| Clinical or User Specifications    | Automatic switch on when waste water is available from treatment unit.<br>Can connect to more than one treatment unit.<br>Separated amalgam is available for recycling. |
| Accessories or Related Consumables |                                                                                                                                                                         |
| Care                               | Standard cleaning and disinfection.                                                                                                                                     |
| Maintenance                        | This type of unit is supplied with a maintenance contract. Service intervals as per manufacturer's instructions.                                                        |
| Supplier Warranty                  | 2 years (excluding deliberate or accidental damage).                                                                                                                    |

## Amalgamator: digital

| Catalogue Number | Item Name            | Available on Transversal Contract | Contract Number or Code |
|------------------|----------------------|-----------------------------------|-------------------------|
| PHC-E-166        | Amalgamator: digital | In preparation                    |                         |

|                                    |                                                                                                                                      |
|------------------------------------|--------------------------------------------------------------------------------------------------------------------------------------|
| Description                        | An electronic unit for the preparation of amalgam.                                                                                   |
| Use                                | For thorough mixing of amalgam or glass ionomer prior to use.                                                                        |
| Clinical or User Specifications    | Note: this unit differs from the older analogue amalgamators.<br>Automatic timer.<br>Must accept mercury and glass ionomer capsules. |
| Accessories or Related Consumables | Replaceable capsule holder.                                                                                                          |
| Care                               | Standard cleaning and disinfection.                                                                                                  |
| Supplier Warranty                  | 2 years (excluding deliberate or accidental damage).                                                                                 |

# Autoclave: cassette-type, desktop

| Catalogue Number | Item Name                                       | Available on Transversal Contract | Contract Number or Code |
|------------------|-------------------------------------------------|-----------------------------------|-------------------------|
| PHC-E-167        | Desktop Autoclave S-Type for Dental Instruments | In preparation                    |                         |

|                                    |                                                                                                                                                                                                                                                                    |                                                                                     |
|------------------------------------|--------------------------------------------------------------------------------------------------------------------------------------------------------------------------------------------------------------------------------------------------------------------|-------------------------------------------------------------------------------------|
| Description                        | A S-type, cassette loading desktop autoclave.                                                                                                                                                                                                                      |  |
| Use                                | For sterilising wrapped, unwrapped or hollow dental instruments. Note that this autoclave is almost exclusively for dental instruments, is transportable, and can be used by outreach teams. Larger autoclaves for shared use are to be found under Sterilisation. |                                                                                     |
| Clinical or User Specifications    | Must be a cassette type loading autoclave.<br>Reservoir for distilled water.<br>Instruments are placed wrapped or unwrapped into the cassette, which is inserted into the steriliser.<br>Drying cycle for wrapped instruments.                                     |                                                                                     |
| Accessories or Related Consumables | Bowie-Dick test pack PHC-C-213. Helix test pack PHC-C-214.<br>Cassette and cassette accessories.                                                                                                                                                                   |                                                                                     |
| Care                               | Must use distilled water. Water distiller must be procured with this unit if not already available.<br>Bowie-Dick, Helix or equivalent tests to be performed as per SOP.                                                                                           |                                                                                     |
| Maintenance                        | This type of unit is supplied with a maintenance contract. Service intervals as per manufacturer's instructions.                                                                                                                                                   |                                                                                     |
| Supplier Warranty                  | 2 years (excluding deliberate or accidental damage).                                                                                                                                                                                                               |                                                                                     |

## Compressor: 2-4 surgeries

| Catalogue Number | Item Name                 | Available on Transversal Contract | Contract Number or Code |
|------------------|---------------------------|-----------------------------------|-------------------------|
| PHC-E-168        | Compressor: 2-4 surgeries | In preparation                    |                         |

|                                    |                                                                                                                                                      |
|------------------------------------|------------------------------------------------------------------------------------------------------------------------------------------------------|
| Description                        | <p>A fixed-installation, oil-free air compressor.</p> <p>This is the preferred option even for a single surgery, as it permits future expansion.</p> |
| Use                                | <p>Mounted externally in a weather-proof enclosure. Serves 2-4 dental surgeries.</p>                                                                 |
| Clinical or User Specifications    | <p>Quiet operation (maximum 60 dB).</p> <p>Oil-free, self-draining.</p> <p>Air filtration system 10µ particles.</p> <p>Storage capacity 35-75l.</p>  |
| Accessories or Related Consumables |                                                                                                                                                      |
| Care                               | <p>Service intervals as per supplier's instructions.</p>                                                                                             |
| Maintenance                        | <p>This type of unit is supplied with a maintenance contract. Service intervals as per manufacturer's instructions.</p>                              |
| Supplier Warranty                  | <p>2 years (excluding deliberate or accidental damage).</p>                                                                                          |



# Cuspidor/Spittoon/Water Unit

| Catalogue Number | Item Name                    | Available on Transversal Contract | Contract Number or Code |
|------------------|------------------------------|-----------------------------------|-------------------------|
| PHC-E-169        | Cuspidor/Spittoon/Water Unit | In preparation                    |                         |

|                                    |                                                                                                                                    |
|------------------------------------|------------------------------------------------------------------------------------------------------------------------------------|
| Description                        | A chairside water and spittoon system.                                                                                             |
| Use                                | Unit supplies warm water for mouth rinsing, and provides a bowl into which water may be ejected.<br>Attachment for saliva ejector. |
| Clinical or User Specifications    | Warm water faucet, with receptacle holder.<br>Enamel bowl with particle trap.<br>Suction connector for saliva ejector.             |
| Accessories or Related Consumables | Autoclaveable HVE cannulas to be supplied.                                                                                         |
| Care                               | Standard cleaning and disinfection.<br>Water quality should be checked according to SOP.                                           |
| Maintenance                        | This type of unit is supplied with a maintenance contract. Service intervals as per manufacturer's instructions.                   |
| Supplier Warranty                  | 5 years (excluding deliberate or accidental damage).                                                                               |

## Delivery system: mobile, with hand pieces, non-fibre-optic

| Catalogue Number | Item Name                                                  | Available on Transversal Contract | Contract Number or Code |
|------------------|------------------------------------------------------------|-----------------------------------|-------------------------|
| PHC-E-170        | Delivery system: mobile, with hand pieces, non-fibre-optic | In preparation.                   |                         |

|                                    |                                                                                                                                                                                                                                                      |
|------------------------------------|------------------------------------------------------------------------------------------------------------------------------------------------------------------------------------------------------------------------------------------------------|
| Description                        | A self-contained unit, consisting of a cabinet on castors housing a compressor, cleanwater system, hand piece outlets, and hand pieces.                                                                                                              |
| Use                                | Used to deliver services where there is no central compressor (if there is a central compressor, select delivery system: fixed). Not compatible with fibre-optic handpieces.                                                                         |
| Clinical or User Specifications    | <p>Cabinet on castors.</p> <p>Hand piece outlets (4 to 6 holes).</p> <p>3 in 1 syringe.</p> <p>Straight hand piece.</p> <p>Contra angle hand piece.</p> <p>High speed hand piece.</p> <p>Air motor.</p> <p>Compressor.</p> <p>Cleanwater system.</p> |
| Accessories or Related Consumables | Note that a curing light and scaler have not been specified for this unit, and must be ordered separately.                                                                                                                                           |
| Care                               | Standard cleaning and disinfection.                                                                                                                                                                                                                  |
| Maintenance                        | This type of unit is supplied with a maintenance contract. Service intervals as per manufacturer's instructions.                                                                                                                                     |
| Supplier Warranty                  | 5 years (excluding deliberate or accidental damage).                                                                                                                                                                                                 |

# Delivery system: fixed, with hand pieces, non-fibre-optic

| Catalogue Number | Item Name                                                 | Available on Transversal Contract | Contract Number or Code |
|------------------|-----------------------------------------------------------|-----------------------------------|-------------------------|
| PHC-E-171        | Delivery system: fixed, with hand pieces, non-fibre-optic | In preparation                    |                         |

|                                    |                                                                                                                                                                                                                                                                                                        |
|------------------------------------|--------------------------------------------------------------------------------------------------------------------------------------------------------------------------------------------------------------------------------------------------------------------------------------------------------|
| Description                        | A Dental delivery system, complete with tubing, spittoon, scaler, clean water system and curing light.                                                                                                                                                                                                 |
| Use                                | This is the unit of choice when there is a central compressor and suction system. Otherwise, choose the mobile delivery system. Not compatible with fibre-optic hand pieces.                                                                                                                           |
| Clinical or User Specifications    | <p>Hand piece outlets (4 to 6 holes) – self-activating.</p> <p>3 in 1 syringe.</p> <p>Control block must have 4-chair position controls (including reset button).</p> <p>The unit must be connected to the cuspidor/ spittoon/ water unit.</p> <p>Piezo-electric scaler and curing light included.</p> |
| Accessories or Related Consumables |                                                                                                                                                                                                                                                                                                        |
| Care                               | Standard cleaning and disinfection.                                                                                                                                                                                                                                                                    |
| Maintenance                        | This type of unit is supplied with a maintenance contract. Service intervals as per manufacturer's instructions.                                                                                                                                                                                       |
| Supplier Warranty                  | 5 years (excluding deliberate or accidental damage).                                                                                                                                                                                                                                                   |

## Dental chair: basic

| Catalogue Number | Item Name           | Available on Transversal Contract | Contract Number or Code |
|------------------|---------------------|-----------------------------------|-------------------------|
| PHC-E-172        | Dental chair: basic | In preparation                    |                         |

|                                    |                                                                                                                                                                                                                                                       |
|------------------------------------|-------------------------------------------------------------------------------------------------------------------------------------------------------------------------------------------------------------------------------------------------------|
| Description                        | Basic dental chair, suitable for a Primary Health Care facility.                                                                                                                                                                                      |
| Use                                | For positioning the patient for examinations and operative procedures.                                                                                                                                                                                |
| Clinical or User Specifications    | <p>Fall range of movement in reclining, height, tilt (Trendelenburg), swivel.</p> <p>Adjustable backrest.</p> <p>Removable upholstery – easily cleanable.</p> <p>Plastic shoe protector – replaceable.</p> <p>Programmable.</p> <p>Foot controls.</p> |
| Accessories or Related Consumables |                                                                                                                                                                                                                                                       |
| Care                               | Standard cleaning and disinfection.                                                                                                                                                                                                                   |
| Maintenance                        | This type of unit is supplied with a maintenance contract. Service intervals as per manufacturer's instructions.                                                                                                                                      |
| Supplier Warranty                  | 5 years (excluding deliberate or accidental damage).                                                                                                                                                                                                  |

# Dental chair: portable

| Catalogue Number | Item Name              | Available on Transversal Contract | Contract Number or Code |
|------------------|------------------------|-----------------------------------|-------------------------|
| PHC-E-173        | Dental chair: portable | In preparation                    |                         |

|                                    |                                                                                                                  |
|------------------------------------|------------------------------------------------------------------------------------------------------------------|
| Description                        | A lightweight, portable dental chair, which folds into a backpack for transportation.                            |
| Use                                | For use by outreach teams.                                                                                       |
| Clinical or User Specifications    | Maximum weight 12,5kg.<br>Height adjustable from 36cm to 60cm.<br>Must support 200kg without deflection.         |
| Accessories or Related Consumables | Backpack. Compatible portable dental light, spit funnel and tray.                                                |
| Care                               | Standard cleaning and disinfection.                                                                              |
| Maintenance                        | This type of unit is supplied with a maintenance contract. Service intervals as per manufacturer's instructions. |
| Supplier Warranty                  | 2 years (excluding deliberate or accidental damage).                                                             |

## Dental curing light

| Catalogue Number | Item Name                     | Available on Transversal Contract | Contract Number or Code |
|------------------|-------------------------------|-----------------------------------|-------------------------|
| PHC-E-174        | Dental curing light: corded   | In preparation                    |                         |
| PHC-E-175        | Dental curing light: cordless | In preparation                    |                         |
|                  |                               |                                   |                         |

|                                    |                                                                                                                                                                                                           |
|------------------------------------|-----------------------------------------------------------------------------------------------------------------------------------------------------------------------------------------------------------|
| Description                        | Handheld light source for curing resin based composites and glass ionomers used in dental restorations.                                                                                                   |
| Use                                | The light probe is held against the composite once the cavity has been filled, to harden the resin. Different compounds and different shades require exposure to the light for different periods of time. |
| Clinical or User Specifications    | Built-in selectable exposure timer.<br>In cordless models, audio-visual warning when battery charge is dropping below adequate levels to deliver stated irradiance. Auto-shutdown when power too low.     |
| Accessories or Related Consumables | All necessary curing probes/tips.<br>Cordless model must be supplied with charger (complete with power cord).                                                                                             |
| Care                               | Standard cleaning and disinfection.<br>Care must be taken not to apply the light for longer than necessary – enough heat can be generated to cause intra-oral burns.                                      |
| Supplier Warranty                  | 2 years (excluding deliberate or accidental damage).                                                                                                                                                      |

## Dental handpieces: non-fibre-optic

| Catalogue Number | Item Name                                  | Available on Transversal Contract | Contract Number or Code |
|------------------|--------------------------------------------|-----------------------------------|-------------------------|
| PHC-E-176        | Turbine: full range                        | In preparation                    |                         |
| PHC-E-177        | Hand-piece motor: slow                     | In preparation                    |                         |
| PHC-E-178        | LED straight handpiece: for micro motor    | In preparation                    |                         |
| PHC-E-179        | LED contra-angle handpiece: for micromotor | In preparation                    |                         |
| PHC-E-180        | LED Prophylaxis handpiece: for micromotor  | In preparation                    |                         |

|                                    |                                                                                                                                                                                                              |
|------------------------------------|--------------------------------------------------------------------------------------------------------------------------------------------------------------------------------------------------------------|
| Description                        | Range of handpieces.                                                                                                                                                                                         |
| Use                                | Only required for replacement purposes, or in facilities where the items were not supplied. The new dental service units specified, are fully equipped with handpieces at time of delivery.                  |
| Clinical or User Specifications    | Note that only non-fibre-optic types with stainless steel bodies are listed here. Other types (fibre-optic, titanium body) can be referenced from the term contract, if required for compatibility purposes. |
| Accessories or Related Consumables |                                                                                                                                                                                                              |
| Care                               | Autoclaveable.                                                                                                                                                                                               |
| Supplier Warranty                  | 2 years (excluding deliberate or accidental damage).                                                                                                                                                         |

## Dental light: LED

| Catalogue Number | Item Name         | Available on Transversal Contract | Contract Number or Code |
|------------------|-------------------|-----------------------------------|-------------------------|
| PHC-E-184        | Dental light: LED | In preparation                    |                         |

|                                    |                                                                                                                                                                                                                                                 |
|------------------------------------|-------------------------------------------------------------------------------------------------------------------------------------------------------------------------------------------------------------------------------------------------|
| Description                        | Operator light for work field illumination.                                                                                                                                                                                                     |
| Use                                | Mounted either on the dental chair, or on the ceiling.                                                                                                                                                                                          |
| Clinical or User Specifications    | LED bulb.<br>Articulated arm can be adjusted in all three axes, to obtain optimal position.<br>Articulated arm will hold the desired position without slippage.<br>Touch sensor to switch on /off and adjust intensity.<br>Shatterproof shield. |
| Accessories or Related Consumables | All mounting hardware to be supplied by the supplier.<br>1 spare bulb.                                                                                                                                                                          |
| Care                               | Optimal location to be determined in consultation with the supplier, the end-user, and provincial infrastructure personnel.<br>Standard cleaning and disinfection.                                                                              |
| Maintenance                        | This type of unit is supplied with a maintenance contract. Service intervals as per manufacturer's instructions.                                                                                                                                |
| Supplier Warranty                  | 5 years (excluding deliberate or accidental damage).                                                                                                                                                                                            |



# Dental scaler: air

| Catalogue Number | Item Name          | Available on Transversal Contract | Contract Number or Code |
|------------------|--------------------|-----------------------------------|-------------------------|
| PHC-E-185        | Dental scaler: air | In preparation                    |                         |

|                                    |                                                                                                                                                   |
|------------------------------------|---------------------------------------------------------------------------------------------------------------------------------------------------|
| Description                        | Air-powered scaler for mounting in the dental delivery unit.                                                                                      |
| Use                                | For scaling of teeth. Needs to be ordered separately if the mobile dental service unit is selected (fixed unit is specified with a piezo scaler). |
| Clinical or User Specifications    | Handpiece must be washable and autoclaveable.                                                                                                     |
| Accessories or Related Consumables | Supplied with at least three scaling tips and wrench, and all other accessories.                                                                  |
| Care                               | Standard cleaning and disinfection (autoclave).                                                                                                   |
| Supplier Warranty                  | 2 years (excluding deliberate or accidental damage).                                                                                              |

## Suction: dry, 2-3 surgeries

| Catalogue Number | Item Name                   | Available on Transversal Contract | Contract Number or Code |
|------------------|-----------------------------|-----------------------------------|-------------------------|
| PHC-E-186        | Suction: dry, 2-3 surgeries | In preparation                    |                         |

|                                    |                                                                                                                                      |
|------------------------------------|--------------------------------------------------------------------------------------------------------------------------------------|
| Description                        | A fixed installation centralised dry aspiration plant for serving 2-4 surgeries.                                                     |
| Use                                | To provide suction to the various items of equipment that require it. This is the type generally used, when water scarcity prevails. |
| Clinical or User Specifications    | Flow rate at least 820l/minute.                                                                                                      |
| Accessories or Related Consumables |                                                                                                                                      |
| Care                               |                                                                                                                                      |
| Maintenance                        | This type of unit is supplied with a maintenance contract. Service intervals as per manufacturer's instructions.                     |
| Supplier Warranty                  | 2 years (excluding deliberate or accidental damage).                                                                                 |

## Suction: dry, mobile

| Catalogue Number | Item Name            | Available on Transversal Contract | Contract Number or Code |
|------------------|----------------------|-----------------------------------|-------------------------|
| PHC-E-187        | Suction: dry, mobile | In preparation                    |                         |

|                                    |                                                                                                                                         |
|------------------------------------|-----------------------------------------------------------------------------------------------------------------------------------------|
| Description                        | Mobile suction unit on castors.                                                                                                         |
| Use                                | For use in a single surgery where the cost of a multi-surgery unit is not warranted. Suitable for use where water supply is restricted. |
| Clinical or User Specifications    | Canister can hold at least 4l of aspirate. Must be emptied manually.                                                                    |
| Accessories or Related Consumables |                                                                                                                                         |
| Care                               |                                                                                                                                         |
| Maintenance                        | This type of unit is supplied with a maintenance contract. Service intervals as per manufacturer's instructions.                        |
| Supplier Warranty                  | 2 years (excluding deliberate or accidental damage).                                                                                    |

## Suction: wet, 2-4 surgeries

| Catalogue Number | Item Name                   | Available on Transversal Contract | Contract Number or Code |
|------------------|-----------------------------|-----------------------------------|-------------------------|
| PHC-E-188        | Suction: wet, 2-4 surgeries | In preparation                    |                         |

|                                    |                                                                                                                                                  |
|------------------------------------|--------------------------------------------------------------------------------------------------------------------------------------------------|
| Description                        | A fixed installation centralised wet aspiration plant for serving 2-4 surgeries.                                                                 |
| Use                                | To provide suction to the various items of equipment that require it. This is the type generally used, when water availability is not a problem. |
| Clinical or User Specifications    | Can serve more than one surgery.                                                                                                                 |
| Accessories or Related Consumables |                                                                                                                                                  |
| Care                               |                                                                                                                                                  |
| Maintenance                        | This type of unit is supplied with a maintenance contract. Service intervals as per manufacturer's instructions.                                 |
| Supplier Warranty                  | 2 years (excluding deliberate or accidental damage).                                                                                             |

# Ultrasonic cleaner

| Catalogue Number | Item Name          | Available on Transversal Contract | Contract Number or Code |
|------------------|--------------------|-----------------------------------|-------------------------|
| PHC-E-189        | Ultrasonic cleaner | In preparation                    |                         |

|                                    |                                                                                                      |
|------------------------------------|------------------------------------------------------------------------------------------------------|
| Description                        | Electronic ultrasonic instrument bath.                                                               |
| Use                                | Cleaning of dental instruments prior to sterilisation.                                               |
| Clinical or User Specifications    | Tank size minimum 4,5l.                                                                              |
| Accessories or Related Consumables | Instrument basket. Optional extra basket, beaker, bur tray.                                          |
| Care                               | Standard cleaning and disinfection.                                                                  |
| Maintenance                        | This unit may require validation of cleaning efficiency at intervals stipulated by the manufacturer. |
| Supplier Warranty                  | 1 year (excluding deliberate or accidental damage).                                                  |

## Water distillation

| Catalogue Number | Item Name               | Available on Transversal Contract | Contract Number or Code |
|------------------|-------------------------|-----------------------------------|-------------------------|
| PHC-E-191        | Water distillation unit | In preparation                    |                         |

|                                    |                                                                                                |
|------------------------------------|------------------------------------------------------------------------------------------------|
| Description                        | A desktop water distillation unit.                                                             |
| Use                                | Produce a supply of distilled water for dental autoclave.                                      |
| Clinical or User Specifications    | Must be able to supply at least 4l of distilled water to supply different types of autoclaves. |
| Accessories or Related Consumables |                                                                                                |
| Care                               | Standard cleaning and disinfection.                                                            |
| Supplier Warranty                  | 1 year (excluding deliberate or accidental damage)                                             |

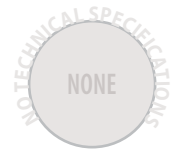

## X-ray Apron

| Catalogue Number | Item Name          | Available on Transversal Contract | Contract Number or Code |
|------------------|--------------------|-----------------------------------|-------------------------|
| PHC-C-181        | X-ray Apron: child | RT21-2015                         | RT21-04-015             |
| PHC-C-182        | X-ray Apron: adult | RT21-2015                         | RT21-04-018             |

|                                    |                                                                                                                                                                                                                                                       |                                                                                      |
|------------------------------------|-------------------------------------------------------------------------------------------------------------------------------------------------------------------------------------------------------------------------------------------------------|--------------------------------------------------------------------------------------|
| Description                        | Radiation Protective Apron.                                                                                                                                                                                                                           |  |
| Use                                | Shielding of patients during dental x-ray procedures.                                                                                                                                                                                                 |                                                                                      |
| Clinical or User Specifications    | <p>Double sided aprons, 0.25mm lead equivalent.</p> <p>Covering to be waterproof, stain-resistant.</p> <p>Lead equivalent must be clearly labelled on the outside of each apron.</p> <p>RT21-04-015: size Small.</p> <p>RT21-04-018 size X-large.</p> |                                                                                      |
| Accessories or Related Consumables | None.                                                                                                                                                                                                                                                 |                                                                                      |
| Care                               |                                                                                                                                                                                                                                                       |                                                                                      |
| Supplier Warranty                  | 1 year (excluding deliberate or accidental damage).                                                                                                                                                                                                   |                                                                                      |

## X-ray: wall-mounted

| Catalogue Number | Item Name           | Available on Transversal Contract | Contract Number or Code |
|------------------|---------------------|-----------------------------------|-------------------------|
| PHC-E-192        | X-ray: wall-mounted | In preparation                    |                         |

|                                    |                                                                                                                                                                                                                                                                                                   |
|------------------------------------|---------------------------------------------------------------------------------------------------------------------------------------------------------------------------------------------------------------------------------------------------------------------------------------------------|
| Description                        | Wall-mounted intra-oral X-ray unit.                                                                                                                                                                                                                                                               |
| Use                                | Capture analogue or digital images of oral anatomy. In a new surgery, analogue images are not an option (require photographic film, chemicals and processing equipment).                                                                                                                          |
| Clinical or User Specifications    | Wall-mounted, usually behind the head end of the dental chair.<br>May require a long arm option to reach the patient while the latter is sitting in the dental chair.<br>Computerised timer. Selectable programmes with automatic setting of time and intensity.<br>Power supply built into unit. |
| Accessories or Related Consumables | Remote control – corded or cordless.<br>Note: If the unit on term contract does not include a digital oral imaging plate, the latter should be ordered at the same time as the X-ray unit.                                                                                                        |
| Care                               | Standard cleaning and disinfection.                                                                                                                                                                                                                                                               |
| Maintenance                        | This type of unit is supplied with a maintenance contract. Service intervals as per manufacturer's instructions.                                                                                                                                                                                  |
| Supplier Warranty                  | 10 years on arm (excluding deliberate or accidental damage).<br>5 years on tube.                                                                                                                                                                                                                  |



# X-ray: Digital oral imaging plate with a computer

| Catalogue Number | Item Name                                         | Available on Transversal Contract | Contract Number or Code |
|------------------|---------------------------------------------------|-----------------------------------|-------------------------|
| PHC-E-193        | X-ray: Digital oral imaging plate with a computer | In preparation                    |                         |

|                                    |                                                                                                                                                                                                                                                                                                                             |
|------------------------------------|-----------------------------------------------------------------------------------------------------------------------------------------------------------------------------------------------------------------------------------------------------------------------------------------------------------------------------|
| Description                        | A system utilising radiation-sensitive plates to acquire digital X-ray images.                                                                                                                                                                                                                                              |
| Use                                | Phosphor-coated plates of different sizes are inserted intra-orally instead of photographic film. The plates are placed in a processor post-exposure to the X-rays. The processor scans the plates, and produces a digital image, which can be viewed on a PC. One unit can be networked to computers in several surgeries. |
| Clinical or User Specifications    | A selection of intra-oral plates, as specified in the term contract.<br>Single-use hygiene bags for each plate size.<br>Note: Compatible laptop/PC must be procured from existing term contracts.                                                                                                                           |
| Accessories or Related Consumables | Storage box or rack for the plates.<br>Hygiene bags 100 per plate size.<br>Image handling and display software.<br>All connectivity requirements between unit and PC(s).                                                                                                                                                    |
| Care                               | Observe aseptic precautions when transferring exposed plate from patient's mouth to processing unit (hygiene bag to be removed as per manufacturer's instructions).                                                                                                                                                         |
| Supplier Warranty                  | 2 years (excluding deliberate or accidental damage).                                                                                                                                                                                                                                                                        |

# REHABILITATION

## Physical Therapy

### Aluminium crutches

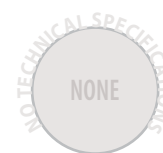

| Catalogue Number | Item Name                             | Available on Transversal Contract | Contract Number or Code |
|------------------|---------------------------------------|-----------------------------------|-------------------------|
| PHC-E-212        | Aluminium crutches: 1 pair adult      | No                                |                         |
| PHC-E-213        | Aluminium crutches: 1 pair paediatric | No                                |                         |

|                                 |                                                                                                                                                                                                                                                                                                                                                                                                                                                                                                                                                                                                                                                                                                                                                                                                                                                     |                                                                                      |
|---------------------------------|-----------------------------------------------------------------------------------------------------------------------------------------------------------------------------------------------------------------------------------------------------------------------------------------------------------------------------------------------------------------------------------------------------------------------------------------------------------------------------------------------------------------------------------------------------------------------------------------------------------------------------------------------------------------------------------------------------------------------------------------------------------------------------------------------------------------------------------------------------|--------------------------------------------------------------------------------------|
| Description                     | Aluminium adjustable elbow crutches in adult and paediatric sizes.                                                                                                                                                                                                                                                                                                                                                                                                                                                                                                                                                                                                                                                                                                                                                                                  |  |
| Use                             | For training patients before prescribing.                                                                                                                                                                                                                                                                                                                                                                                                                                                                                                                                                                                                                                                                                                                                                                                                           |                                                                                      |
| Clinical or User Specifications | <p>Handle and cuff is a one- piece design with soft handle, plastic, moulded, vinyl coated. Adjustability in shaft utilizes double click mechanism.</p> <p>Adult: Height from handle to ground (470mm-650mm) Extra length available. Height from handle to ground (470mm-650mm). Maximum body weight 120kg. Supplied as pair. Ferrules and cuffs available separately.</p> <p>Paediatric and Youth: Single adjustable Paediatric crutches. Sold per pair. Available in 2 height options- Paediatric and youth.</p> <p>Ferrules must have a thick base and a metal washer to help prevent splitting. Easy to attach and come in 22mm and 24mm.</p> <p>Must meet SABS standards. Samples of crutches and ferrules must be issued in advance of award of tender to test durability of each in rough terrain.</p> <p>Must comply with CSK 112-1973.</p> |                                                                                      |
| Accessories                     | None.                                                                                                                                                                                                                                                                                                                                                                                                                                                                                                                                                                                                                                                                                                                                                                                                                                               |                                                                                      |
| Care                            | Ensure that all moveable parts are working and secure before use.                                                                                                                                                                                                                                                                                                                                                                                                                                                                                                                                                                                                                                                                                                                                                                                   |                                                                                      |
| Supplier Warranty               | 1 year (excluding deliberate or accidental damage).                                                                                                                                                                                                                                                                                                                                                                                                                                                                                                                                                                                                                                                                                                                                                                                                 |                                                                                      |

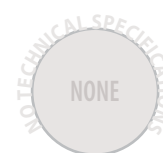

## Balance pad

| Catalogue Number | Item Name   | Available on Transversal Contract | Contract Number or Code |
|------------------|-------------|-----------------------------------|-------------------------|
| PHC-E-214        | Balance pad | No                                |                         |

|                                 |                                                                                                                                                                                                  |                                                                                      |
|---------------------------------|--------------------------------------------------------------------------------------------------------------------------------------------------------------------------------------------------|--------------------------------------------------------------------------------------|
| Description                     | Pillow-shaped thick foam mat approximately 50cm x 41cm x 6cm used for assessing and treating balance reactions and postural control.                                                             |  |
| Use                             | To retrain balance in geriatrics, sports, orthopaedic, neuromusculoskeletal and neuro patients.                                                                                                  |                                                                                      |
| Clinical or User Specifications | Closed-cell foam pad. Impervious to water, easy to clean and long-lasting. Travelling teams could consider the Balance Air Cushion instead of the Balance pad.                                   |                                                                                      |
| Accessories                     | None.                                                                                                                                                                                            |                                                                                      |
| Care                            | Remove shoes before exercising on the pad, as this may damage the pad surface. Do not place heavy objects or objects with sharp edges on top of the pad. Do not expose pad to high temperatures. |                                                                                      |
| Supplier Warranty               | 2 years (excluding deliberate or accidental damage).<br>Expected service life 5 years.                                                                                                           |                                                                                      |

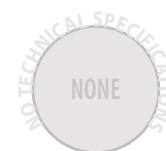

## Basin: portable, large

| Catalogue Number | Item Name              | Available on Transversal Contract | Contract Number or Code |
|------------------|------------------------|-----------------------------------|-------------------------|
| PHC-E-215        | Basin: portable, large | No                                |                         |

|                                 |                                                                                                |                                                                                     |
|---------------------------------|------------------------------------------------------------------------------------------------|-------------------------------------------------------------------------------------|
| Description                     | Enamel dish 50cm diameter.                                                                     |  |
| Use                             | Used in a variety of settings including after POP removal, for septic hands and for foot care. |                                                                                     |
| Clinical or User Specifications | Should be of sufficient depth to immerse a foot up to an ankle above the malleoli.             |                                                                                     |
| Accessories                     | None.                                                                                          |                                                                                     |
| Care                            | should be autoclaveable.                                                                       |                                                                                     |
| Supplier Warranty               | N/A.                                                                                           |                                                                                     |

# Bobath ball

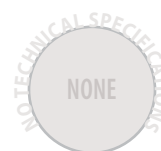

| Catalogue Number | Item Name         | Available on Transversal Contract | Contract Number or Code |
|------------------|-------------------|-----------------------------------|-------------------------|
| PHC-E-216        | Bobath ball: 85cm | No                                |                         |
| PHC-E-217        | Bobath ball: 65cm | No                                |                         |
| PHC-E-218        | Bobath ball: 45cm | No                                |                         |

|                                 |                                                                                                                                                                                                                                                                                                                              |                                                                                      |
|---------------------------------|------------------------------------------------------------------------------------------------------------------------------------------------------------------------------------------------------------------------------------------------------------------------------------------------------------------------------|--------------------------------------------------------------------------------------|
| Description                     | Large PVC inflatable ball. Pressure can be regulated by inflating or deflating the ball.                                                                                                                                                                                                                                     |  |
| Use                             | For stimulation of afferent pathways to the brain, eliciting postural reactions, evaluating and training balance and co-ordination and rehabilitating core muscles in a variety of patients.                                                                                                                                 |                                                                                      |
| Clinical or User Specifications | Dense PVC, extremely durable, easy to clean and antibacterial. Anti-burst.<br>Three sizes: 85cm diameter, 65cm diameter, 45cm diameter.<br>Maximum weight-bearing 150kg.                                                                                                                                                     |                                                                                      |
| Accessories                     | Hand pump and spare plugs.                                                                                                                                                                                                                                                                                                   |                                                                                      |
| Care                            | Avoid solvents and bleach. Ball must be placed and stored on a surface without abrasive edges or puncturing may happen. Clients should be appropriately assessed and selected for this equipment. Adequate supervision and appropriate exercise prescription is required to prevent falls. Maximum weight must be respected. |                                                                                      |
| Supplier Warranty               | 1 year (excluding deliberate or accidental damage).                                                                                                                                                                                                                                                                          |                                                                                      |
| Note to Procurement             | Balls should be procured in sets of three sizes. One hand pump per set is sufficient, but balls should have their own spare plugs.<br>Expected service life 5 years.                                                                                                                                                         |                                                                                      |

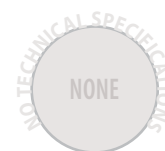

## Bobath roller

| Catalogue Number | Item Name           | Available on Transversal Contract | Contract Number or Code |
|------------------|---------------------|-----------------------------------|-------------------------|
| PHC-E-219        | Bobath roller: 50cm | No                                |                         |
| PHC-E-220        | Bobath roller: 30cm | No                                |                         |
|                  |                     |                                   |                         |

|                                 |                                                                                                                                                                                                                                                                                                                                                                                                                                                                                                                                                            |                                                                                    |
|---------------------------------|------------------------------------------------------------------------------------------------------------------------------------------------------------------------------------------------------------------------------------------------------------------------------------------------------------------------------------------------------------------------------------------------------------------------------------------------------------------------------------------------------------------------------------------------------------|------------------------------------------------------------------------------------|
| Description                     | Foam roller covered in tarpaulin/imitation leather.                                                                                                                                                                                                                                                                                                                                                                                                                                                                                                        |  |
| Use                             | For stimulating postural reactions and rehabilitating core muscles in a variety of patients.                                                                                                                                                                                                                                                                                                                                                                                                                                                               |                                                                                    |
| Clinical or User Specifications | <p>Roller should be light but able to withstand 200kg. The core is made from very firm foam. The outer layer should be antibacterial plastic (100% polyester or PVC) which is easy to wipe and clean.</p> <p>Large: length between 120 and 150cm, diameter 50cm.</p> <p>Small: length between 90 and 120cm, diameter 30cm.</p> <p>Maximum weight of roller 5kg.</p> <p>Weight-bearing capacity 200kg.</p> <p>The roller should be able to withstand weights and knocks usually sustained in a clinical and transportation setting without deformation.</p> |                                                                                    |
| Accessories                     | None.                                                                                                                                                                                                                                                                                                                                                                                                                                                                                                                                                      |                                                                                    |
| Care                            | <p>Do not place roller underneath heavy or sharp objects as this may damage the shape or covering. Clients should be appropriately assessed and selected for this equipment. Adequate supervision and appropriate exercise prescription is required to prevent falls. Maximum weight must be respected.</p>                                                                                                                                                                                                                                                |                                                                                    |
| Supplier Warranty               | 1 year (excluding deliberate or accidental damage).                                                                                                                                                                                                                                                                                                                                                                                                                                                                                                        |                                                                                    |
| Note to Procurement             | <p>1 year warranty required.</p> <p>Purchase in sets of 2 (large and small).</p> <p>Expected service life 5 years.</p>                                                                                                                                                                                                                                                                                                                                                                                                                                     |                                                                                    |

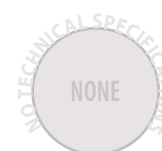

## Construction play equipment

| Catalogue Number | Item Name                   | Available on Transversal Contract | Contract Number or Code |
|------------------|-----------------------------|-----------------------------------|-------------------------|
| PHC-E-221        | Construction play equipment | No                                |                         |

|                                 |                                                                                                                                                                                                                                                                                                                                                                       |
|---------------------------------|-----------------------------------------------------------------------------------------------------------------------------------------------------------------------------------------------------------------------------------------------------------------------------------------------------------------------------------------------------------------------|
| Description                     | Large Lego set with minimum 100 building bricks of assorted sizes/shapes and colours, set of Duplo building bricks, minimum 30 pieces of assorted sizes/ shapes and colours; set of minimum 40 pieces painted wooden square, rectangle and triangular blocks, Puzzles ([3-6], [9-12], [20-24], [36-48] pieces made of wood or cardboard that is at least 1.5mm thick. |
| Use                             | Paint or varnish on wooden blocks must be non-toxic.                                                                                                                                                                                                                                                                                                                  |
| Clinical or User Specifications | Building bricks must be Lego/Duplo brand, as other makes are not as robust and corners tend to chip off and discolour and they lose their ability to grip each other.                                                                                                                                                                                                 |
| Accessories                     |                                                                                                                                                                                                                                                                                                                                                                       |
| Care                            |                                                                                                                                                                                                                                                                                                                                                                       |
| Supplier Warranty               | N/A.                                                                                                                                                                                                                                                                                                                                                                  |

## Hot water bottle: standard

| Catalogue Number | Item Name                  | Available on Transversal Contract | Contract Number or Code |
|------------------|----------------------------|-----------------------------------|-------------------------|
| PHC-E-222        | Hot water bottle: standard | No                                |                         |

|                                 |                                                                                                                                                                                    |                                                                                    |
|---------------------------------|------------------------------------------------------------------------------------------------------------------------------------------------------------------------------------|------------------------------------------------------------------------------------|
| Description                     | Standard hot water bottle and removable towelling cover.                                                                                                                           |  |
| Use                             | For pain relief and muscle relaxation in patients with musculoskeletal, rheumatological and orthopaedic conditions.                                                                |                                                                                    |
| Clinical or User Specifications | Heat-resistant silicon rubber bottle, 1litre capacity.<br>Instead of hydro collator for hot-packs (more portable and durable). Also for working with ear moulds in audio patients. |                                                                                    |
| Accessories                     | Spare bung or sealing washer.                                                                                                                                                      |                                                                                    |
| Care                            | Beware of burns when preparing or applying hot water bottle. This product should not be purchased without a kettle being available at site.                                        |                                                                                    |
| Supplier Warranty               | 1 year (excluding deliberate or accidental damage).                                                                                                                                |                                                                                    |



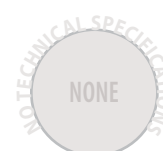

# Mat: gym

| Catalogue Number | Item Name | Available on Transversal Contract | Contract Number or Code |
|------------------|-----------|-----------------------------------|-------------------------|
| PHC-E-223        | Mat: gym  | No                                |                         |

|                                 |                                                                                                                                                                                                                                                                          |
|---------------------------------|--------------------------------------------------------------------------------------------------------------------------------------------------------------------------------------------------------------------------------------------------------------------------|
| Description                     | <p>Large foam rubber gym mat for exercises, as well as assessing and treating children. These mats can be easily rolled up and stored/ transported.</p>                                |
| Use                             | For assessment and exercises, can be used for individual rehab or group therapy.                                                                                                                                                                                         |
| Clinical or User Specifications | Size 180cm (L) x 100cm (W) x 1.5cm thick. Must be easy to roll up for transportation and storage. High-quality closed-cell memory foam, with a non-slip surface. Material should be easy to wipe and disinfect. Material should be durable and not prone to deformation. |
| Accessories                     | None.                                                                                                                                                                                                                                                                    |
| Care                            | Do not place heavy objects or those with sharp edges on top of the mat, as this could damage the material. Do not expose to high temperatures.                                                                                                                           |
| Supplier Warranty               | 2 years (excluding deliberate or accidental damage).<br>Expected service life 5 years.                                                                                                                                                                                   |

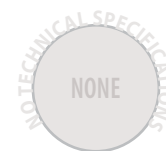

## Mirror: handheld

| Catalogue Number | Item Name                     | Available on Transversal Contract | Contract Number or Code |
|------------------|-------------------------------|-----------------------------------|-------------------------|
| PHC-E-224        | Mirror: handheld, with cover  | No                                |                         |
| PHC-E-225        | Mirror: handheld, with handle | No                                |                         |

|                                 |                                                                                                                                                                                                                                                                                           |
|---------------------------------|-------------------------------------------------------------------------------------------------------------------------------------------------------------------------------------------------------------------------------------------------------------------------------------------|
| Description                     | <p>Small rectangular A4 sized mirror.</p> <p>One model has a protective cover which also functions as an adjustable stand. Mirror can thus be tilted to different angles as needed.</p> <p>The other model has a handle for easier holding, can also be hung vertically on a surface.</p> |
| Use                             | For fitting hearing aids, learning to examine skin for pressure areas in neuro patients, providing oral rehabilitation and rehabilitating self-care.                                                                                                                                      |
| Clinical or User Specifications | <p>A protective cover which doubles as a stand is the most practical solution for travelling teams.</p> <p>The model with a handle may be the preferred option for patient use.</p>                                                                                                       |
| Accessories                     | None.                                                                                                                                                                                                                                                                                     |
| Care                            | Standard cleaning and disinfection. Do not drop or scratch. Do not place heavy objects on top of mirror.                                                                                                                                                                                  |
| Supplier Warranty               | 6 months (excluding deliberate or accidental damage).                                                                                                                                                                                                                                     |

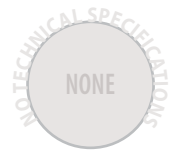

## Soccer ball

| Catalogue Number | Item Name   | Available on Transversal Contract | Contract Number or Code |
|------------------|-------------|-----------------------------------|-------------------------|
| PHC-E-226        | Soccer ball | No                                |                         |

|                                 |                                                                                                                                                                                                                                                                                                                                                                                                                 |                                                                                     |
|---------------------------------|-----------------------------------------------------------------------------------------------------------------------------------------------------------------------------------------------------------------------------------------------------------------------------------------------------------------------------------------------------------------------------------------------------------------|-------------------------------------------------------------------------------------|
| Description                     | Plastic inflatable soccer ball.                                                                                                                                                                                                                                                                                                                                                                                 |  |
| Use                             | For rehabilitating sports and musculoskeletal conditions, but also used in neuro rehab and in group work.                                                                                                                                                                                                                                                                                                       |                                                                                     |
| Clinical or User Specifications | 22cm diameter, the ball's weight must be in the range of 410 to 450 grams (14 to 16 ounces) and inflated to a pressure of between 0.6 and 1.1 standard atmospheres (8.8 and 16.2 psi) at sea level. The outer lining can be of synthetic leather, PVC or felt. The covering should be backed by multiple layers (minimum of 2) of polyester and the bladder should be of latex rubber or butyl. Silicone valve. |                                                                                     |
| Accessories                     | Pump and valve adapter.                                                                                                                                                                                                                                                                                                                                                                                         |                                                                                     |
| Care                            | Do not puncture or expose to high temperatures.                                                                                                                                                                                                                                                                                                                                                                 |                                                                                     |
| Supplier Warranty               | N/A.                                                                                                                                                                                                                                                                                                                                                                                                            |                                                                                     |

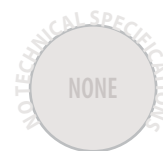

## Standing frame: prone upper standing frame

| Catalogue Number | Item Name                                      | Available on Transversal Contract | Contract Number or Code |
|------------------|------------------------------------------------|-----------------------------------|-------------------------|
| PHC-E-227        | Positioner: prone upper standing frame, small  | RT233-2017                        | 42192208-00527          |
| PHC-E-228        | Positioner: prone upper standing frame, medium | RT233-2017                        | 42192208-00528          |
| PHC-E-229        | Positioner: prone upper standing frame, large  | RT233-2017                        | 42192208-00529          |

|                                 |                                                                                                                                                                                                                                                                                                                                                                                                                                                                                                                                                                                                                                                                                                                                                                              |
|---------------------------------|------------------------------------------------------------------------------------------------------------------------------------------------------------------------------------------------------------------------------------------------------------------------------------------------------------------------------------------------------------------------------------------------------------------------------------------------------------------------------------------------------------------------------------------------------------------------------------------------------------------------------------------------------------------------------------------------------------------------------------------------------------------------------|
| Description                     | Wooden modular standing frame, padded, in small, medium and large sizes.                                                                                                                                                                                                                                                                                                                                                                                                                                                                                                                                                                                                                                                                                                     |
| Use                             | For assisting patients in standing and weight-bearing to improve postural control, encourage functional activities in standing posture and address/prevent joint contractures.                                                                                                                                                                                                                                                                                                                                                                                                                                                                                                                                                                                               |
| Clinical or User Specifications | <p>Adjustable prone standing support.<br/> Adjustable forward tilt to prone minimum 30 degrees.<br/> Upright posture support: lower limb, pelvis and trunk.<br/> Allow age appropriate abduction of hips.<br/> Allow age appropriate hip and knee extension.<br/> To provide knee support under patella, height adjustable and well padded for comfort<br/> Foot support with adjustable forwards and backwards, abduction and lateral rotation<br/> Lay tray / worktable: removable, adjustable height and forwards.</p> <p>Sizes:<br/> Extra Small: heel – head 65cm-100cm, hip width max 30cm<br/> Small: heel to head 85-120cm. Hip width max 30cm<br/> Medium: heel to head 200cm-135cm hip width max 35cm<br/> Large: heel to head 135cm-160cm hip width max 40cm.</p> |
| Accessories                     |                                                                                                                                                                                                                                                                                                                                                                                                                                                                                                                                                                                                                                                                                                                                                                              |
| Care                            |                                                                                                                                                                                                                                                                                                                                                                                                                                                                                                                                                                                                                                                                                                                                                                              |
| Supplier Warranty               | 1 year (excluding deliberate or accidental damage).                                                                                                                                                                                                                                                                                                                                                                                                                                                                                                                                                                                                                                                                                                                          |

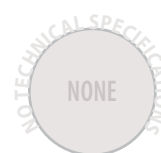

## Tape measure: retractable, soft

| Catalogue Number | Item Name                       | Available on Transversal Contract | Contract Number or Code |
|------------------|---------------------------------|-----------------------------------|-------------------------|
| PHC-E-230        | Tape measure: retractable, soft |                                   |                         |

|                                 |                                                                                                                                                                                                                                                                                                                                                                                  |                                                                                     |
|---------------------------------|----------------------------------------------------------------------------------------------------------------------------------------------------------------------------------------------------------------------------------------------------------------------------------------------------------------------------------------------------------------------------------|-------------------------------------------------------------------------------------|
| Description                     | Flexible soft retractable measuring tape in a hard-plastic casing.                                                                                                                                                                                                                                                                                                               |  |
| Use                             | For measuring swelling or muscle mass, as well as in manufacturing assistive devices and fitting them.                                                                                                                                                                                                                                                                           |                                                                                     |
| Clinical or User Specifications | <p>Retraction mechanism should be durable and not prone to breaking.</p> <p>Retracting 60 inch/1.5m non-stretch fiberglass tape in a durable plastic case for long life.</p> <p>Non-stretch, non-fade.</p> <p>The tape measure width is 0.3 inch/ 8mm, the retractable tape measure diameter is 2 inches. Large and clear markings in both Inches and cm for easier reading.</p> |                                                                                     |
| Accessories                     | None.                                                                                                                                                                                                                                                                                                                                                                            |                                                                                     |
| Care                            | Standard cleaning and disinfection. Do not overextend the tape as this will break the retraction mechanism.                                                                                                                                                                                                                                                                      |                                                                                     |
| Supplier Warranty               | <p>1 year (excluding deliberate or accidental damage).</p> <p>Expected service life 5 years.</p>                                                                                                                                                                                                                                                                                 |                                                                                     |

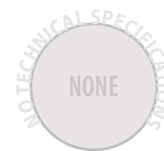

## Toys: multisensory

| Catalogue Number | Item Name          | Available on Transversal Contract | Contract Number or Code |
|------------------|--------------------|-----------------------------------|-------------------------|
| PHC-E-231        | Toys: multisensory | No                                |                         |

|                                 |                                                                                                                                                                                                                                                                                                                                                                                                                                                                                                                                                                                                                                                                                                                                                                                                                                                                                                               |
|---------------------------------|---------------------------------------------------------------------------------------------------------------------------------------------------------------------------------------------------------------------------------------------------------------------------------------------------------------------------------------------------------------------------------------------------------------------------------------------------------------------------------------------------------------------------------------------------------------------------------------------------------------------------------------------------------------------------------------------------------------------------------------------------------------------------------------------------------------------------------------------------------------------------------------------------------------|
| Description                     | Collection of toys providing tactile, auditory and visual stimulation.                                                                                                                                                                                                                                                                                                                                                                                                                                                                                                                                                                                                                                                                                                                                                                                                                                        |
| Use                             | For assessing, introducing new stimuli and treating patients with sensory integration issues.                                                                                                                                                                                                                                                                                                                                                                                                                                                                                                                                                                                                                                                                                                                                                                                                                 |
| Clinical or User Specifications | <p>Colourful, robust 10-15cm plastic rattle; soft plastic squeaky toy with maximum dimension of 15cm; 15cm soft washable fabric ball; non-toxic modelling clay of 4 different colours, 100g of each colour; 11-13-inch plastic/vinyl baby doll with jointed hips and shoulders, sleep-eyes, removable set of clothing, 5 robust die-cast metal toy cars representing assorted actual vehicles (e.g. fire engine, lorry, sedan car, tractor, bakkie, delivery van, etc.), between 5 and 8cm long.</p> <p>Items must be made of non-toxic materials, have no sharp edges or corners, no internal magnets.</p> <p>Surfaces should be resistant to bacterial colonisation.</p> <p>Toys must be washable and paint must endure alcohol or chlorine-based disinfection without peeling.</p> <p>Toys must not have small items that could come loose and be put into a child's mouth, e.g. loosely sewn buttons.</p> |
| Accessories                     | Baby doll should come with toy feeding bottle.                                                                                                                                                                                                                                                                                                                                                                                                                                                                                                                                                                                                                                                                                                                                                                                                                                                                |
| Care                            | Clean and disinfect after each use.                                                                                                                                                                                                                                                                                                                                                                                                                                                                                                                                                                                                                                                                                                                                                                                                                                                                           |
| Supplier Warranty               |                                                                                                                                                                                                                                                                                                                                                                                                                                                                                                                                                                                                                                                                                                                                                                                                                                                                                                               |

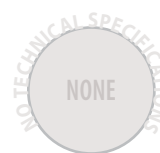

## Transfer board

| Catalogue Number | Item Name      | Available on Transversal Contract | Contract Number or Code |
|------------------|----------------|-----------------------------------|-------------------------|
| PHC-E-232        | Transfer board | No                                |                         |

|                                 |                                                                                                                                                                             |
|---------------------------------|-----------------------------------------------------------------------------------------------------------------------------------------------------------------------------|
| Description                     | Varnished, curved wooden plank with hand holes cut into them.                                                                                                               |
| Use                             | Enables patients to transfer between bed and wheelchair, by sliding along the board.                                                                                        |
| Clinical or User Specifications | The transfer board must have an oblong hole on each side Width: (750mm x 338mm) thickness (6mm-12mm maximum) the board must weigh 1.6-2kg and have a weight capacity 300kg. |
| Accessories                     | Strap for shoulder carry.<br>Carry bag.                                                                                                                                     |
| Care                            | Standard cleaning and disinfection.                                                                                                                                         |
| Supplier Warranty               | N/A.<br>Expected service life 5 years.                                                                                                                                      |

# Walking frame

| Catalogue Number | Item Name                 | Available on Transversal Contract | Contract Number or Code |
|------------------|---------------------------|-----------------------------------|-------------------------|
| PHC-E-233        | Walking frame: adult      | HM03-2015CW                       | 2.1                     |
| PHC-E-234        | Walking frame: paediatric | No                                |                         |

|                                 |                                                                                                                                                                                                                                                                                                                                                                                                                                                                                                                                                                                                                                                                                                                                                                                                                                                                                                                                                                                                                                                                                                                                                                                                                                                                                                                                                                                                                                                                                                                                                                                                                                                                                       |                                                                                      |
|---------------------------------|---------------------------------------------------------------------------------------------------------------------------------------------------------------------------------------------------------------------------------------------------------------------------------------------------------------------------------------------------------------------------------------------------------------------------------------------------------------------------------------------------------------------------------------------------------------------------------------------------------------------------------------------------------------------------------------------------------------------------------------------------------------------------------------------------------------------------------------------------------------------------------------------------------------------------------------------------------------------------------------------------------------------------------------------------------------------------------------------------------------------------------------------------------------------------------------------------------------------------------------------------------------------------------------------------------------------------------------------------------------------------------------------------------------------------------------------------------------------------------------------------------------------------------------------------------------------------------------------------------------------------------------------------------------------------------------|--------------------------------------------------------------------------------------|
| Description                     | Aluminium four-legged height adjustable, foldable walking frame with rubber handles and durable rubber ferrules.                                                                                                                                                                                                                                                                                                                                                                                                                                                                                                                                                                                                                                                                                                                                                                                                                                                                                                                                                                                                                                                                                                                                                                                                                                                                                                                                                                                                                                                                                                                                                                      |  |
| Use                             | For training patients before prescribing.                                                                                                                                                                                                                                                                                                                                                                                                                                                                                                                                                                                                                                                                                                                                                                                                                                                                                                                                                                                                                                                                                                                                                                                                                                                                                                                                                                                                                                                                                                                                                                                                                                             |                                                                                      |
| Clinical or User Specifications | <p>Walking aid, pulpit walker, folded metal frame, height adjustable.</p> <p>Frame must fold into a flat position with legs together, When in the extended position the frame must be secure to prevent collapse while walking Folding/unfolding of the walker must be smooth and easy to operate. Frame may be riveted or bolted together.</p> <p>Where components are joined, plastic spacers, fitting snugly to the tube, must ensure a rigid assembly. Nuts must have nylon locking inserts. Bolts may not protrude beyond the nuts.</p> <p>Rivets must have a washer on the clinched side to prevent them pulling loose.</p> <p>There must be no sharp points. Tubes to be anodised aluminium of quality at least that of 6063T6. Tubes must be at least 1,5 mm thick. The mechanism must be wobble-free, even in the fully extended position.</p> <p>Height adjustable: 650-800 mm.</p> <p>Height adjustment on all four legs by means of two spring-loaded pins and matching holes.</p> <p>Spring loaded pins must be at least 8 mm in diameter. Holes must not be countersunk.</p> <p>Pins must protrude at least 2 mm beyond the outside of the outer tube.</p> <p>Height adjustment of the walker must be smooth and easy to operate.</p> <p>Clearance between the sliding uprights must be as small as possible and must not exceed 0,6 mm.</p> <p>The height adjustable legs must have an anti-rattle bush at the top of the inner tube.</p> <p>The two front legs must be splayed forward.</p> <p>Width at the base of the front end: +/- 450 mm (minimum).</p> <p>The two back legs must be splayed backward.</p> <p>Width at the base of the rear end: +/- 600 mm.</p> |                                                                                      |



|                     |                                                                                                                                                                                                                                                                                                                                                                                                                                                                                                                                                                                                                                                                                                                                                                                                                                                                                                                                                                                   |
|---------------------|-----------------------------------------------------------------------------------------------------------------------------------------------------------------------------------------------------------------------------------------------------------------------------------------------------------------------------------------------------------------------------------------------------------------------------------------------------------------------------------------------------------------------------------------------------------------------------------------------------------------------------------------------------------------------------------------------------------------------------------------------------------------------------------------------------------------------------------------------------------------------------------------------------------------------------------------------------------------------------------|
|                     | <p>Durable rubber shoes must be fitted to each leg.</p> <p>The shoes must be fitted so that they cannot be removed by pulling and twisting.</p> <p>Shoe diameter: 44 mm where it makes contact with the floor. Shoe may taper to approximately 30 mm.</p> <p>The hole in the shoe must be at least 35 mm deep.</p> <p>The floor contact of the shoe must be concave with an anti-slip tread.</p> <p>The end of the tube onto which the shoe is fitted must be plugged.</p> <p>Hand grips must be of resilient and durable plastic this is resistant to perspiration and scuffing and which does not stain the hands.</p> <p>The palm section of the hand grip may not include any pronounced lump.</p> <p>Mass: less than 2 kg.</p> <p>Items 2.1 and 2.2 will be considered as a series.</p> <p>Should be compatible with small front castors to enable the prescriber to adjust it into a walker for patients who are unable to lift the walking frame safely between steps.</p> |
| Accessories         | Front castor wheels and stems specific to the walking frame.                                                                                                                                                                                                                                                                                                                                                                                                                                                                                                                                                                                                                                                                                                                                                                                                                                                                                                                      |
| Care                | Ensure that all moveable parts are working and secure before use.                                                                                                                                                                                                                                                                                                                                                                                                                                                                                                                                                                                                                                                                                                                                                                                                                                                                                                                 |
| Supplier Warranty   | <p>1 year (excluding deliberate or accidental damage).</p> <p>Expected service life 5 years.</p>                                                                                                                                                                                                                                                                                                                                                                                                                                                                                                                                                                                                                                                                                                                                                                                                                                                                                  |
| Note to Procurement | Ensure that the frame is purchased together with fitting front castors.                                                                                                                                                                                                                                                                                                                                                                                                                                                                                                                                                                                                                                                                                                                                                                                                                                                                                                           |

# Walking stick

| Catalogue Number | Item Name                 | Available on Transversal Contract | Contract Number or Code |
|------------------|---------------------------|-----------------------------------|-------------------------|
| PHC-E-235        | Walking stick: adult      | HM03-2015CW                       | 4.1                     |
| PHC-E-236        | Walking stick: paediatric | No                                |                         |

|                                 |                                                                                                                                                                                                                                                                                                     |                                                                                      |
|---------------------------------|-----------------------------------------------------------------------------------------------------------------------------------------------------------------------------------------------------------------------------------------------------------------------------------------------------|--------------------------------------------------------------------------------------|
| Description                     | Aluminium walking stick, adjustable. Adult and Paediatric sizes.                                                                                                                                                                                                                                    |  |
| Use                             | For stock. There needs to be a minimum stock level set for assistive devices.                                                                                                                                                                                                                       |                                                                                      |
| Clinical or User Specifications | Walking stick, height adjustable: 650-900mm, low mass metal with crutch type T-handle. Adjustment by means of spring-loaded pins. Spring loaded pins must be hard aluminium, brass or mild steel nickel plated and adjustment must be easy and smooth. Durable plastic handgrip. With attached tip. |                                                                                      |
| Accessories                     | None.                                                                                                                                                                                                                                                                                               |                                                                                      |
| Care                            | Sand and grime may interfere with adjusting mechanism- ensure user keeps this as clean as possible.                                                                                                                                                                                                 |                                                                                      |
| Supplier Warranty               | 1 year (excluding deliberate or accidental damage).                                                                                                                                                                                                                                                 |                                                                                      |

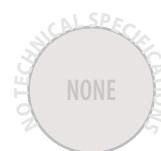

## Wedges: set of 4

| Catalogue Number | Item Name        | Available on Transversal Contract | Contract Number or Code |
|------------------|------------------|-----------------------------------|-------------------------|
| PHC-E-237        | Wedges: set of 4 | No                                |                         |

| Description                     | Set of hard foam wedges covered in PVC or tarpaulin and of varying heights and lengths.                                                                                                                                                                                                                                                                                                                                                                                                                                                                                                                                                                                                                      |              |             |              |             |              |    |    |   |               |    |    |    |               |    |    |    |                  |    |    |    |
|---------------------------------|--------------------------------------------------------------------------------------------------------------------------------------------------------------------------------------------------------------------------------------------------------------------------------------------------------------------------------------------------------------------------------------------------------------------------------------------------------------------------------------------------------------------------------------------------------------------------------------------------------------------------------------------------------------------------------------------------------------|--------------|-------------|--------------|-------------|--------------|----|----|---|---------------|----|----|----|---------------|----|----|----|------------------|----|----|----|
| Use                             | For rehabilitating head control, postural control and scapular stability in neuro patients, as well as assisting in positioning neuro, musculoskeletal and orthopaedic patients.                                                                                                                                                                                                                                                                                                                                                                                                                                                                                                                             |              |             |              |             |              |    |    |   |               |    |    |    |               |    |    |    |                  |    |    |    |
| Clinical or User Specifications | <p>Core from very firm foam, Hygienic, (100% polyester) tarpaulin cover. Must be antibacterial plastic which is easy to wipe and clean. The wedges should be able to withstand weights and knocks usually sustained in a clinical and transportation setting without deformation. Load capacity 145kg.</p> <table><thead><tr><th>Item</th><th>Length (cm)</th><th>Breadth (cm)</th><th>Height (cm)</th></tr></thead><tbody><tr><td>Wedge 45 x 8</td><td>45</td><td>45</td><td>8</td></tr><tr><td>Wedge 45 x 15</td><td>45</td><td>45</td><td>15</td></tr><tr><td>Wedge 45 x 20</td><td>45</td><td>45</td><td>20</td></tr><tr><td>Sliding wedge 45</td><td>90</td><td>45</td><td>45</td></tr></tbody></table> | Item         | Length (cm) | Breadth (cm) | Height (cm) | Wedge 45 x 8 | 45 | 45 | 8 | Wedge 45 x 15 | 45 | 45 | 15 | Wedge 45 x 20 | 45 | 45 | 20 | Sliding wedge 45 | 90 | 45 | 45 |
| Item                            | Length (cm)                                                                                                                                                                                                                                                                                                                                                                                                                                                                                                                                                                                                                                                                                                  | Breadth (cm) | Height (cm) |              |             |              |    |    |   |               |    |    |    |               |    |    |    |                  |    |    |    |
| Wedge 45 x 8                    | 45                                                                                                                                                                                                                                                                                                                                                                                                                                                                                                                                                                                                                                                                                                           | 45           | 8           |              |             |              |    |    |   |               |    |    |    |               |    |    |    |                  |    |    |    |
| Wedge 45 x 15                   | 45                                                                                                                                                                                                                                                                                                                                                                                                                                                                                                                                                                                                                                                                                                           | 45           | 15          |              |             |              |    |    |   |               |    |    |    |               |    |    |    |                  |    |    |    |
| Wedge 45 x 20                   | 45                                                                                                                                                                                                                                                                                                                                                                                                                                                                                                                                                                                                                                                                                                           | 45           | 20          |              |             |              |    |    |   |               |    |    |    |               |    |    |    |                  |    |    |    |
| Sliding wedge 45                | 90                                                                                                                                                                                                                                                                                                                                                                                                                                                                                                                                                                                                                                                                                                           | 45           | 45          |              |             |              |    |    |   |               |    |    |    |               |    |    |    |                  |    |    |    |
| Accessories                     | None.                                                                                                                                                                                                                                                                                                                                                                                                                                                                                                                                                                                                                                                                                                        |              |             |              |             |              |    |    |   |               |    |    |    |               |    |    |    |                  |    |    |    |
| Care                            | Do not place wedges underneath heavy or sharp objects as this may damage the shape or covering. Clients should be appropriately assessed and selected for this equipment. Adequate supervision and appropriate exercise prescription is required.                                                                                                                                                                                                                                                                                                                                                                                                                                                            |              |             |              |             |              |    |    |   |               |    |    |    |               |    |    |    |                  |    |    |    |
| Supplier Warranty               | 2 years (excluding deliberate or accidental damage).<br>Expected service life 5 years.                                                                                                                                                                                                                                                                                                                                                                                                                                                                                                                                                                                                                       |              |             |              |             |              |    |    |   |               |    |    |    |               |    |    |    |                  |    |    |    |

## Weight band: ankle and wrist

| Catalogue Number | Item Name                               | Available on Transversal Contract | Contract Number or Code |
|------------------|-----------------------------------------|-----------------------------------|-------------------------|
| PHC-E-238        | Weights: ankle and wrist, 200g to 2.5kg | No                                |                         |

|                                 |                                                                                                                                                                                                                                                                                                                             |                                                                                      |
|---------------------------------|-----------------------------------------------------------------------------------------------------------------------------------------------------------------------------------------------------------------------------------------------------------------------------------------------------------------------------|--------------------------------------------------------------------------------------|
| Description                     | <p>Ankle and wrist bands with individual compartments to which metal weights are added, to adjust the total weight of the band. Band is secured onto wrist or ankle with d-ring and Velcro straps to accommodate different sized limbs.</p>                                                                                 |  |
| Use                             | Used for exercise rehabilitation, for strengthening muscles in orthopaedic and musculoskeletal conditions.                                                                                                                                                                                                                  |                                                                                      |
| Clinical or User Specifications | <p>The outer layer should be antibacterial plastic which is easy to wipe and clean. The wedges should be able to withstand weights and knocks usually sustained in a clinical and transportation setting without deformation.</p> <p>5 individual weight bags of 200g. total weight can be adjusted from 200g to 2,5kg.</p> |                                                                                      |
| Accessories                     | None.                                                                                                                                                                                                                                                                                                                       |                                                                                      |
| Care                            | Clients should be appropriately assessed and selected for this equipment. Adequate supervision and appropriate exercise prescription is required to prevent injury.                                                                                                                                                         |                                                                                      |
| Supplier Warranty               | <p>2 years (excluding deliberate or accidental damage).</p> <p>Expected service life 5 years.</p>                                                                                                                                                                                                                           |                                                                                      |

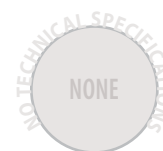

# Wheelchair

| Catalogue Number | Item Name                                                                        | Available on Transversal Contract | Contract Number or Code                                                             |
|------------------|----------------------------------------------------------------------------------|-----------------------------------|-------------------------------------------------------------------------------------|
| PHC-E-239        | Wheelchair: Standard back height, 25cm x 30cm, no customisation, with basic tray | RT233                             | 42192210-00000 plus<br>2192208-00505                                                |
| PHC-E-240        | Wheelchair: Standard back height, 30cm x 30cm, with customisation and basic tray | RT233                             | 42192210-00001 plus<br>42192208-00015 plus<br>2192208-00507                         |
| PHC-E-241        | Wheelchair: Standard back height, 30cm x 40cm, with customisation and basic tray | RT233                             | 42192210-00003 plus<br>42192208-00015 plus<br>42192208-00011 plus<br>2192208-00507  |
| PHC-E-242        | Wheelchair: Short back height, 36cm x 40cm, with customisation and basic tray    | RT233                             | 42192210-00017 plus<br>42192208-00015 plus<br>42192208-00011 plus<br>2192208-00508  |
| PHC-E-243        | Wheelchair: Standard back height, 41cm wide, with customisation and basic tray   | RT233                             | 42192210-00006 plus<br>42192208-00015 plus<br>42192208-00011 plus<br>2192208-00509  |
| PHC-E-244        | Wheelchair: Standard back height, 46cm wide, with customisation and basic tray   | RT233                             | 42192210-00007 plus<br>42192208-00015 plus<br>42192208-00011 plus<br>2192208-00510  |
| PHC-E-246        | Wheelchair: Standard back height, 51cm wide, with customisation and basic tray   | RT233                             | 42192210-00008 plus<br>42192208-00015 plus<br>42192208-00013 plus<br>42192208-00511 |

|                                 |                                                                                                                                                                                                                                                                                      |                                                                                     |
|---------------------------------|--------------------------------------------------------------------------------------------------------------------------------------------------------------------------------------------------------------------------------------------------------------------------------------|-------------------------------------------------------------------------------------|
| Description                     | Basic folding-frame wheelchair, standard back height. Epoxy-coated finish. Customised for rugged terrain, with basic tray.                                                                                                                                                           |  |
| Use                             | This wheelchair in 7 seat sizes is intended to be kept at the facility for assessment and training of users. Based on the assessment, a customised version can be ordered for the patient from the RT233 Term Contract.                                                              |                                                                                     |
| Clinical or User Specifications | Chairs have been selected with customisation options for rugged terrain rear wheels and castors. Comprehensive user specifications are available in RT233 -2017 – detailed technical specifications. Too extensive to repeat here.<br>Weight not to exceed 24kg with rubber castors. |                                                                                     |
| Accessories                     | Repair/tool kit:<br>4 rear wheel bearings<br>4 castor axle bearings<br>4 castor stem bearings<br>4 seat guides (if applicable to the model)<br>adjustment tool.                                                                                                                      |                                                                                     |
| Care                            | User must be trained in care, maintenance and cleaning. Repair and modification must be offered on site and as outreach.                                                                                                                                                             |                                                                                     |
| Supplier Warranty               | Frame and cross-bars guaranteed for a minimum of 3 years during appropriate use.                                                                                                                                                                                                     |                                                                                     |

# Speech Therapy/Audiology

## Audiometer: portable

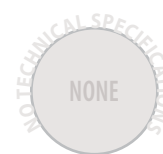

| Catalogue Number | Item Name            | Available on Transversal Contract | Contract Number or Code |
|------------------|----------------------|-----------------------------------|-------------------------|
| PHC-E-247        | Audiometer: portable | RT274-2018ME                      | 42182419-009331         |

|                                 |                                                                                                                                                                                                                                                                                                                                                                                                                                                                                                                                                                                                                              |
|---------------------------------|------------------------------------------------------------------------------------------------------------------------------------------------------------------------------------------------------------------------------------------------------------------------------------------------------------------------------------------------------------------------------------------------------------------------------------------------------------------------------------------------------------------------------------------------------------------------------------------------------------------------------|
| Description                     | Laptop-based two-channel audiometer.                                                                                                                                                                                                                                                                                                                                                                                                                                                                                                                                                                                         |
| Use                             | For portable audiometric testing, where an acoustically insulated booth is not available. The audiometer uses noise-cancelling headphones to reproduce a quiet environment.                                                                                                                                                                                                                                                                                                                                                                                                                                                  |
| Clinical or User Specifications | <p>Masked pure tone and warble tone air and bone conduction and speech testing. Masking sounds must include narrowband, white and speech noise.</p> <p>Must test 125-20 000Hz from -10-120dB (100dB for frequencies above 12 000Hz) in increments of 5db. Unit must either have internal storage for pre-recorded speech in South African accents/languages, or must have an external CD player, from which speech can be played. The audiometer must control the CD player directly.</p> <p>Requires compatible laptop, with sufficient processing power and Random Access Memory, to perform the necessary processing.</p> |
| Accessories                     | <p>Must be supplied complete with noise-cancelling earphones, paired insert phones, bone conductor, response button, talk-forward, built-in or gooseneck microphone. Either built-in pre-recorded speech storage, or USB ports and an external CD player to play pre-recorded speech.</p> <p>Manuals, software and carry case.</p> <p>Power cord.</p> <p>Charger, if applicable.</p>                                                                                                                                                                                                                                         |
| Care                            |                                                                                                                                                                                                                                                                                                                                                                                                                                                                                                                                                                                                                              |
| Supplier Warranty               | <p>2 years.</p> <p>Expected service life 10 years.</p>                                                                                                                                                                                                                                                                                                                                                                                                                                                                                                                                                                       |
| Instructions to Suppliers       | Personnel to be trained in use of the equipment. Software updates to be provided free of charge. Describe requirements for the compatible computer.                                                                                                                                                                                                                                                                                                                                                                                                                                                                          |
| Note to Procurement             | Compatible laptop computer to be sourced from available term contracts.                                                                                                                                                                                                                                                                                                                                                                                                                                                                                                                                                      |

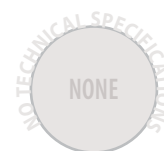

## Cards: therapy, speech

| Catalogue Number | Item Name                              | Available on Transversal Contract | Contract Number or Code |
|------------------|----------------------------------------|-----------------------------------|-------------------------|
| PHC-E-248        | Vocabulary, picture – food             | RT275-2016                        | 85122108-00438          |
| PHC-E-249        | Vocabulary, picture – everyday objects | RT275-2016                        | 85122108-00439          |
| PHC-E-250        | Vocabulary, picture – basic verbs      | RT275-2016                        | 85122108-00440          |
| PHC-E-251        | Vocabulary, picture – familiar verbs   | RT275-2016                        | 85122108-00441          |
| PHC-E-252        | Vocabulary, picture – categories       | RT275-2016                        | 85122108-00442          |
| PHC-E-253        | Vocabulary, picture – what`s wrong?    | RT275-2016                        | 85122108-00447          |

|                                 |                                                                                                  |
|---------------------------------|--------------------------------------------------------------------------------------------------|
| Description                     | Sets of high- quality photozgraph cards – themed equipment for language and sensory development. |
| Use                             | To treat language delays and communication pathologies.                                          |
| Clinical or User Specifications |                                                                                                  |
| Accessories                     |                                                                                                  |
| Care                            |                                                                                                  |
| Supplier Warranty               |                                                                                                  |



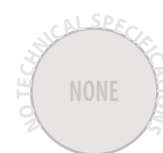

# HiPro box

| Catalogue Number | Item Name | Available on Transversal Contract | Contract Number or Code |
|------------------|-----------|-----------------------------------|-------------------------|
| PHC-E-254        | HiPro box | RT274-2018ME                      | 42182419-00330          |

|                                 |                                                                                                                                                                                |
|---------------------------------|--------------------------------------------------------------------------------------------------------------------------------------------------------------------------------|
| Description                     | A box which permits the connection of programmable hearing aids to a computer, for adjustment of the hearing aid to the patient's needs.                                       |
| Use                             | Interface connector for programming hearing aids.                                                                                                                              |
| Clinical or User Specifications | Uses open standard HiPro interface. Connects to a laptop which contains the programming software (via USB) and the hearing aid (via specialised connectors).<br>Mains powered. |
| Accessories                     | Power cable, USB-to-USB cable, interface cable to hearing aids. Modular software for use with the device.                                                                      |
| Care                            |                                                                                                                                                                                |
| Supplier Warranty               | 2 years.<br>Expected service life 10 years.                                                                                                                                    |
| Instructions to Suppliers       | Hardware installation assistance and training must be provided. Describe requirements for the compatible computer.                                                             |

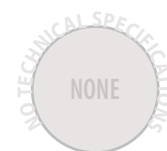

## Noise makers

| Catalogue Number | Item Name    | Available on Transversal Contract | Contract Number or Code |
|------------------|--------------|-----------------------------------|-------------------------|
| PHC-E-255        | Noise makers | No                                |                         |

|                                 |                                                                                                                                                                                                                                                                                                                          |
|---------------------------------|--------------------------------------------------------------------------------------------------------------------------------------------------------------------------------------------------------------------------------------------------------------------------------------------------------------------------|
| Description                     | Set of three gadgets that produce sounds in specific frequency ranges.                                                                                                                                                                                                                                                   |
| Use                             | Assessment of hearing range in pre-verbal babies.                                                                                                                                                                                                                                                                        |
| Clinical or User Specifications | 1 sturdy plastic rattle with tiny balls inside that produces a sound of about 2000Hz when gently tilted, 1 sturdy plastic rattle with bigger balls inside that produces a sound of about 500Hz when gently tilted, 1 plastic or metal handle with three to five round brass bells each with a diameter of about 15-20mm. |
| Accessories                     | None.                                                                                                                                                                                                                                                                                                                    |
| Care                            |                                                                                                                                                                                                                                                                                                                          |
| Supplier Warranty               | 1 year.                                                                                                                                                                                                                                                                                                                  |

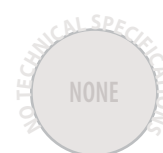

## OAE/AABR screener (portable)

| Catalogue Number | Item Name                    | Available on Transversal Contract | Contract Number or Code |
|------------------|------------------------------|-----------------------------------|-------------------------|
| PHC-E-256        | OAE/AABR screener (portable) | RT274-2018ME                      | 42182419-009349         |

|                                 |                                                                                                                                                                                                                         |
|---------------------------------|-------------------------------------------------------------------------------------------------------------------------------------------------------------------------------------------------------------------------|
| Description                     | A hand-held portable unit capable of conducting screening DPOAEs and automated ABRs.                                                                                                                                    |
| Use                             |                                                                                                                                                                                                                         |
| Clinical or User Specifications | Must consist of the hand-held screening unit, probe, system cables (USB to connect system to computer); ABR cable. Must store at least 50 tests and have a built-in normative database to reference pass/refer results. |
| Accessories                     | Charger unit and power cord, carry case, instruction manual, data management software CD.<br>Ear tip accessory box, including probe replacement filters and 50 ear tips of various sizes, including for babies.         |
| Care                            |                                                                                                                                                                                                                         |
| Supplier Warranty               | 2 years.<br>Expected service life 10 years.                                                                                                                                                                             |
| Note to Procurement             | Supplier to indicate whether firmware updates may be necessary in the lifetime of the instrument; if so, manner of obtaining/installing the updates, at no additional cost.                                             |

# Otolight

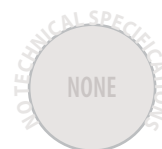

| Catalogue Number | Item Name | Available on Transversal Contract | Contract Number or Code |
|------------------|-----------|-----------------------------------|-------------------------|
| PHC-E-257        | Otolight  | RT274-2018ME                      | 42143504-00010          |

|                                 |                                                                                                                                                                       |
|---------------------------------|-----------------------------------------------------------------------------------------------------------------------------------------------------------------------|
| Description                     | Otolight for ear mould impressions Complete with compatible batteries, hard casing and minimum of 2 tapered tips (hard transparent plastic tips).<br>Battery-powered. |
| Use                             |                                                                                                                                                                       |
| Clinical or User Specifications |                                                                                                                                                                       |
| Accessories                     | Supplied with a set of non-corrosive batteries.                                                                                                                       |
| Care                            |                                                                                                                                                                       |
| Supplier Warranty               | 2 years.                                                                                                                                                              |

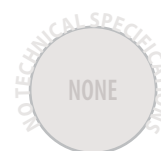

# Otoscope: portable

| Catalogue Number | Item Name          | Available on Transversal Contract | Contract Number or Code |
|------------------|--------------------|-----------------------------------|-------------------------|
| PHC-E-258        | Otoscope: portable | RT274-2018ME                      | RT274-2018ME            |

|                                 |                                                                                                                                                                                                                                                                                                                                                                                                                                                                                                                                                                                                                                                                                          |
|---------------------------------|------------------------------------------------------------------------------------------------------------------------------------------------------------------------------------------------------------------------------------------------------------------------------------------------------------------------------------------------------------------------------------------------------------------------------------------------------------------------------------------------------------------------------------------------------------------------------------------------------------------------------------------------------------------------------------------|
| Description                     | Battery-powered otoscope for ear examination.                                                                                                                                                                                                                                                                                                                                                                                                                                                                                                                                                                                                                                            |
| Use                             | Examination and instrumentation of external auditory meatus and middle ear.                                                                                                                                                                                                                                                                                                                                                                                                                                                                                                                                                                                                              |
| Clinical or User Specifications | <p>Robust case with zip or other closure, housing otoscope head, handle, and specula.</p> <p>The Otoscope to be supplied with 3 polypropylene specula in each size 2.5, 3, 4 and 5 mm – re-usable quality.</p> <p>The Otoscope is to utilize fibre optic cool-light supply with no reflections. The Otoscope is to have a Wide-angled viewing lens for instrumentation whilst under magnification. The unit is to be completely sealed for Pneumatic otoscopy (i.e. not open operating model). Light LED (optimized for best tissue viewing).</p> <p>Knurled handle, housing two non-corrosive batteries; connector for the instrument head, and rheostat for brightness adjustment.</p> |
| Accessories                     | <p>Specula.</p> <p>Case.</p> <p>Spare globe.</p> <p>Non-corrosive batteries (1 set).</p>                                                                                                                                                                                                                                                                                                                                                                                                                                                                                                                                                                                                 |
| Care                            |                                                                                                                                                                                                                                                                                                                                                                                                                                                                                                                                                                                                                                                                                          |
| Supplier Warranty               | <p>Minimum 7-year warranty on head and handle.</p> <p>Expected service life 15 years.</p>                                                                                                                                                                                                                                                                                                                                                                                                                                                                                                                                                                                                |
| Note to Procurement             | These specifications differ from RT274, and should be used in future procurements, particularly regarding warranty.                                                                                                                                                                                                                                                                                                                                                                                                                                                                                                                                                                      |

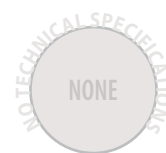

## Tympanometer: portable, screening

| Catalogue Number | Item Name                         | Available on Transversal Contract | Contract Number or Code |
|------------------|-----------------------------------|-----------------------------------|-------------------------|
| PHC-E-259        | Tympanometer: portable, screening | RT274-2018ME                      | RT274-2018ME            |

|                                 |                                                                                                                                                                                        |
|---------------------------------|----------------------------------------------------------------------------------------------------------------------------------------------------------------------------------------|
| Description                     | Portable screening tympanometer with high frequency and reflex testing options.                                                                                                        |
| Use                             | For hearing screening.                                                                                                                                                                 |
| Clinical or User Specifications | Must have standard 226Hz and 1 000Hz probe tones and must test reflexes at 250, 1000, 2000 and 4000Hz. Must include an internal printer, probe assembly, memory for at least 12 tests. |
| Accessories                     | Two rolls of paper.<br>Box of ear tips of at least six different sizes, with three tips of each size.<br>Carry case, instruction manual.<br>Replacement paper rolls.                   |
| Care                            | Avoid dropping and moisture.                                                                                                                                                           |
| Supplier Warranty               | 2 years.<br>Expected service life 10 years.                                                                                                                                            |
| Note to Procurement             | Consumables; paper to be compatible with the internal printer.                                                                                                                         |

# equipment general

---

## BUILDING MAINTENANCE

118

|                                              |     |
|----------------------------------------------|-----|
| Basic tool kit                               | 118 |
| Extension cable: electrical, general purpose | 120 |
| Ladder: aluminium, folding                   | 121 |
| Multi-plug                                   | 122 |

---

## CLEANING

123

|                                            |     |
|--------------------------------------------|-----|
| Bin: pedal 4,5 l                           | 123 |
| Bin: pedal 20l                             | 124 |
| Bin: wall-mounted, refuse bag holding unit | 125 |
| Bin: sanitary towel                        | 126 |
| Bin: sharps                                | 127 |
| Broom: interior use                        | 128 |
| Buckets: colour coded                      | 129 |
| Dust pan and brush set                     | 130 |
| Mop: colour-coded                          | 131 |
| Mop: static head, complete                 | 132 |
| Paper towel dispenser: folded towels       | 133 |
| Paper towel dispenser: roll                | 134 |
| Soap dispenser                             | 135 |
| Spray bottle                               | 136 |
| Squeegee                                   | 137 |
| Toilet roll dispenser                      | 138 |
| Trolley: janitor                           | 139 |

---

## COLD CHAIN

140

|                           |     |
|---------------------------|-----|
| Cooler box                | 140 |
| Thermometer: data logging | 141 |
| Thermometer: refrigerator | 142 |
| Thermometer: room         | 143 |

---

## FIRE SAFETY

144

|                   |     |
|-------------------|-----|
| Fire extinguisher | 144 |
| Fire hose on reel | 145 |
| Smoke alarm       | 146 |

---

## GARDEN

147

|                                       |     |
|---------------------------------------|-----|
| Bins: waste, heavy duty               | 147 |
| Broom                                 | 148 |
| Edge Trimmer/brush cutter: heavy duty | 149 |
| Extension cable: electrical, garden   | 150 |
| Fork                                  | 151 |
| Gardening set: 3-piece                | 152 |
| Hedge clipper: shears, manual         | 153 |
| Hoe                                   | 154 |
| Hosepipe: garden                      | 155 |
| Lawn mower: Electric, heavy duty      | 156 |
| Lawn mower: petrol, heavy duty        | 157 |
| Pick mattock                          | 158 |
| Rake: leaf and grass, heavy duty      | 159 |
| Rake: steel, heavy duty               | 160 |
| Shovel: square mouth                  | 161 |
| Slasher                               | 162 |
| Spade                                 | 163 |
| Watering can                          | 164 |
| Wheelbarrow                           | 165 |

---

## INFORMATION AND

## COMMUNICATIONS TECHNOLOGY

166

---

## KITCHEN

167

|                            |     |
|----------------------------|-----|
| Kettle: electric           | 167 |
| Rack: dish                 | 168 |
| Rack: cutlery              | 169 |
| Urn: electric              | 170 |
| Watercooler: free-standing | 171 |

---

## MISCELLANEOUS

172

|                                |     |
|--------------------------------|-----|
| Bins: brazier                  | 172 |
| Clock: wall                    | 173 |
| Complaints and suggestions box | 174 |
| Gun safe                       | 175 |
| Notice board: wall-mounted     | 176 |
| Pamphlet-holding boxes         | 177 |
| Poster display boards          | 178 |
| Whiteboard                     | 179 |

# Building maintenance

TECHNICAL SPECIFICATIONS  
page  
631 to 666

## Basic tool kit

| Catalogue Number | Item Name                          | Available on Transversal Contract | Contract Number or Code |
|------------------|------------------------------------|-----------------------------------|-------------------------|
| PHC-E-194        | Allen key set                      | No                                |                         |
| PHC-E-195        | Clamps, adjustable (pair)          | No                                |                         |
| PHC-E-196        | Drill, cordless                    | No                                |                         |
| PHC-E-197        | Drill bit set                      | No                                |                         |
| PHC-E-078        | File, flat, combined               | No                                |                         |
| PHC-E-198        | Foam cutter, electric              | No                                |                         |
| PHC-E-199        | Frying pan, electric, for splints  | No                                |                         |
| PHC-E-080        | Funnel, plastic, medium            | No                                |                         |
| PHC-E-081        | Hacksaw, all-metal                 | No                                |                         |
| PHC-E-082        | Hacksaw blades, assorted           | No                                |                         |
| PHC-E-072        | Hammer, claw, approximately 450gm  | No                                |                         |
| PHC-E-200        | Hearing Protector                  | No                                |                         |
| PHC-E-201        | Heat gun, electric                 | No                                |                         |
| PHC-E-202        | Jigsaw, electric                   | No                                |                         |
| PHC-E-203        | Jigsaw blades, set                 | No                                |                         |
| PHC-E-204        | Measuring rule, folding            | No                                |                         |
| PHC-E-077        | Pliers set                         | No                                |                         |
| PHC-E-083        | Pruning saw, medium                | No                                |                         |
| PHC-E-084        | Pruning shears, bypass, heavy duty | No                                |                         |
| PHC-E-205        | Punch, revolving                   | No                                |                         |
| PHC-E-206        | Punch, eyelet                      | No                                |                         |



|           |                                        |    |  |
|-----------|----------------------------------------|----|--|
| PHC-E-156 | Riveter, hand                          | No |  |
| PHC-E-086 | Scraper, paint, medium                 | No |  |
| PHC-E-073 | Screwdriver set                        | No |  |
| PHC-E-079 | Sharpening stone, medium/fine combined | No |  |
| PHC-E-074 | Shifting spanner, 0-40mm               | No |  |
| PHC-E-075 | Swivel-head spanner set                | No |  |
| PHC-E-207 | Tape measure, industrial               | No |  |
| PHC-E-157 | Toolbox                                | No |  |
| PHC-E-208 | Utility knife, replaceable blades      | No |  |
| PHC-E-085 | Voltage tester, contactless            | No |  |
| PHC-E-076 | Water pump pliers                      | No |  |
| PHC-E-209 | Workbench, folding, portable           | No |  |

|                                    |                                                                                                                                      |                                                                                       |
|------------------------------------|--------------------------------------------------------------------------------------------------------------------------------------|---------------------------------------------------------------------------------------|
| Description                        | Basic tool kit.                                                                                                                      |  |
| Use                                | For general maintenance and maintenance of garden tools.                                                                             |                                                                                       |
| Clinical or User Specifications    | This kit has the commonest tools required for non-specialised maintenance. Excludes plumbing and electrical, building and carpentry. |                                                                                       |
| Accessories or Related Consumables | None.                                                                                                                                |                                                                                       |
| Care                               | Clean tools after use to avoid corrosion.                                                                                            |                                                                                       |
| Supplier Warranty                  | 1 year (excluding deliberate or accidental damage).                                                                                  |                                                                                       |

## Extension cable: electrical, general purpose

| Catalogue Number | Item Name                                        | Available on Transversal Contract | Contract Number or Code |
|------------------|--------------------------------------------------|-----------------------------------|-------------------------|
| PHC-E-069        | Extension cable: Electrical, general purpose 3m  | No                                |                         |
| PHC-E-070        | Extension cable: Electrical, general purpose 5m  | No                                |                         |
| PHC-E-071        | Extension cable: Electrical, general purpose 10m | No                                |                         |
| PHC-E-211        | Extension cable: on reel, 20m                    | No                                |                         |

|                                    |                                                                                                                                                                                                                                          |                                                                                      |
|------------------------------------|------------------------------------------------------------------------------------------------------------------------------------------------------------------------------------------------------------------------------------------|--------------------------------------------------------------------------------------|
| Description                        | <p>Extension cable, electrical. General purpose, various lengths available.</p> <p>Reel-mounted cable is for use by outreach teams, as the cable is protected from damage in transit.</p>                                                |  |
| Use                                | Electrical extension for general use.                                                                                                                                                                                                    |                                                                                      |
| Clinical or User Specifications    | This extension has a normal 15A 3-pin plug on one end, and two 15A 3-pin connectors at the other.                                                                                                                                        |                                                                                      |
| Accessories or Related Consumables | None.                                                                                                                                                                                                                                    |                                                                                      |
| Care                               | <p>Coil without twisting when not in use.</p> <p>If accidentally cut during use, have it properly mended by maintenance personnel.</p> <p>If extension becomes warm in use, burns, or gives off sparks, discontinue use immediately.</p> |                                                                                      |
| Supplier Warranty                  | 1 year (excluding deliberate or accidental damage).                                                                                                                                                                                      |                                                                                      |

## Ladder: aluminium, folding

| Catalogue Number | Item Name         | Available on Transversal Contract | Contract Number or Code |
|------------------|-------------------|-----------------------------------|-------------------------|
| PHC-E-068        | Ladder: aluminium | No                                |                         |

|                                    |                                                         |                                                                                     |
|------------------------------------|---------------------------------------------------------|-------------------------------------------------------------------------------------|
| Description                        | Ladder: aluminium.                                      |  |
| Use                                | For gardening and general maintenance work.             |                                                                                     |
| Clinical or User Specifications    | Heavy duty folding and extendable aluminium stepladder. |                                                                                     |
| Accessories or Related Consumables | None.                                                   |                                                                                     |
| Care                               | Clean after use to prevent metal corrosion.             |                                                                                     |
| Supplier Warranty                  | 1 year (excluding deliberate or accidental damage).     |                                                                                     |

## Multi-plug

| Catalogue Number | Item Name  | Available on Transversal Contract | Contract Number or Code |
|------------------|------------|-----------------------------------|-------------------------|
| PHC-E-210        | Multi-plug | No                                |                         |

|                                    |                                                                                                                                                                                       |                                                                                    |
|------------------------------------|---------------------------------------------------------------------------------------------------------------------------------------------------------------------------------------|------------------------------------------------------------------------------------|
| Description                        | Multi-plug adaptor.                                                                                                                                                                   | 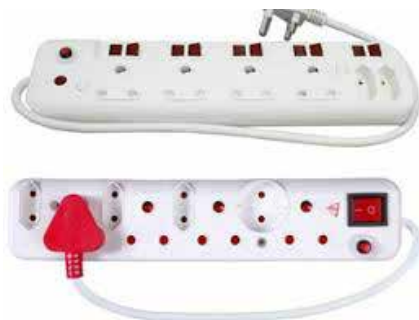 |
| Use                                | For using machines (audiometers, screening tympanometers, electrotherapy, splinting pans) where plug points are not ideally placed (e.g. at schools, community halls, older clinics). |                                                                                    |
| Clinical or User Specifications    |                                                                                                                                                                                       |                                                                                    |
| Accessories or Related Consumables | None.                                                                                                                                                                                 |                                                                                    |
| Care                               |                                                                                                                                                                                       |                                                                                    |
| Supplier Warranty                  | 1 year (excluding deliberate or accidental damage).                                                                                                                                   |                                                                                    |

# Cleaning

TECHNICAL SPECIFICATIONS  
page  
763

## Bin: pedal 4,5 l

| Catalogue Number | Item Name        | Available on Transversal Contract | Contract Number or Code |
|------------------|------------------|-----------------------------------|-------------------------|
| PHC-E-001        | Bin: pedal, 4,5l | No                                |                         |

|                                    |                                                                                                                                                                          |                                                                                     |
|------------------------------------|--------------------------------------------------------------------------------------------------------------------------------------------------------------------------|-------------------------------------------------------------------------------------|
| Description                        | Light-duty stainless steel pedal bin.                                                                                                                                    |  |
| Use                                | Waste bin for use in low-use areas, where space is restricted.                                                                                                           |                                                                                     |
| Clinical or User Specifications    | <p>All stainless steel construction.</p> <p>Rubber bumpers inside lid to reduce noise.</p> <p>Can be used with or without a bin liner, depending on the application.</p> |                                                                                     |
| Accessories or Related Consumables |                                                                                                                                                                          |                                                                                     |
| Care                               | Standard cleaning and disinfection.                                                                                                                                      |                                                                                     |
| Supplier Warranty                  | 2 years on all components (excluding deliberate or accidental damage).                                                                                                   |                                                                                     |

## Bin: pedal 20l

| Catalogue Number | Item Name       | Available on Transversal Contract | Contract Number or Code |
|------------------|-----------------|-----------------------------------|-------------------------|
| PHC-E-002        | Bin: pedal, 20l | No                                |                         |

|                                    |                                                                                                                                                                                                                  |                                                                                     |
|------------------------------------|------------------------------------------------------------------------------------------------------------------------------------------------------------------------------------------------------------------|-------------------------------------------------------------------------------------|
| Description                        | Heavy-duty stainless steel pedal bin.                                                                                                                                                                            |  |
| Use                                | Waste bin for use in high-use areas, where a domestic light-duty bin is not suitable.                                                                                                                            |                                                                                     |
| Clinical or User Specifications    | <p>All stainless steel construction.</p> <p>Rubber bumpers inside lid to reduce noise.</p> <p>Non-scratch, rubber-tipped feet.</p> <p>Can be used with or without a bin liner, depending on the application.</p> |                                                                                     |
| Accessories or Related Consumables |                                                                                                                                                                                                                  |                                                                                     |
| Care                               | Standard cleaning and disinfection.                                                                                                                                                                              |                                                                                     |
| Supplier Warranty                  | 2 years on all components (excluding deliberate or accidental damage).                                                                                                                                           |                                                                                     |

## Bin: wall-mounted, refuse bag holding unit

| Catalogue Number | Item Name                                  | Available on Transversal Contract | Contract Number or Code |
|------------------|--------------------------------------------|-----------------------------------|-------------------------|
| PHC-E-003        | Bin: wall-mounted, refuse bag holding unit | No                                |                         |

|                                    |                                                                                                                                                      |                                                                                     |
|------------------------------------|------------------------------------------------------------------------------------------------------------------------------------------------------|-------------------------------------------------------------------------------------|
| Description                        | Bin, wall-mounted, refuse bag holding unit.                                                                                                          |  |
| Use                                | Waste bin for use in high-use areas, where waste is deposited directly into a black plastic bag.                                                     |                                                                                     |
| Clinical or User Specifications    | The unit is a wall-mounted horizontal frame, in which a waste bag is secured in the open-mouth position. The bag is held in place by an outer frame. |                                                                                     |
| Accessories or Related Consumables |                                                                                                                                                      |                                                                                     |
| Care                               | Standard cleaning and disinfection.                                                                                                                  |                                                                                     |
| Supplier Warranty                  | 2 years on all components (excluding deliberate or accidental damage).                                                                               |                                                                                     |

## Bin: sanitary towel

| Catalogue Number | Item Name           | Available on Transversal Contract | Contract Number or Code |
|------------------|---------------------|-----------------------------------|-------------------------|
| PHC-E-004        | Bin: sanitary towel | No                                |                         |

|                                    |                                                                                   |                                                                                     |
|------------------------------------|-----------------------------------------------------------------------------------|-------------------------------------------------------------------------------------|
| Description                        | Bin: sanitary towel.                                                              |  |
| Use                                | For disposal of sanitary towels in facilities with septic tank sewerage disposal. |                                                                                     |
| Clinical or User Specifications    |                                                                                   |                                                                                     |
| Accessories or Related Consumables |                                                                                   |                                                                                     |
| Care                               | Standard cleaning and disinfection.                                               |                                                                                     |
| Supplier Warranty                  | 1 year on all components (excluding deliberate or accidental damage).             |                                                                                     |



## Bin: sharps

| Catalogue Number | Item Name   | Available on Transversal Contract | Contract Number or Code |
|------------------|-------------|-----------------------------------|-------------------------|
| PHC-E-005        | Bin: sharps | No                                |                         |

|                                    |                                                                                                                                                                                                                                                                                                                                   |                                                                                     |
|------------------------------------|-----------------------------------------------------------------------------------------------------------------------------------------------------------------------------------------------------------------------------------------------------------------------------------------------------------------------------------|-------------------------------------------------------------------------------------|
| Description                        | Bin: sharps.                                                                                                                                                                                                                                                                                                                      |  |
| Use                                | For discarding syringes, needles, broken vials, cartridges, scalpel blades, lancets, and other contaminated sharp objects.                                                                                                                                                                                                        |                                                                                     |
| Clinical or User Specifications    | Robust, puncture-proof, tamper-proof, leak-proof.<br>One-way entry port, no spillage if knocked over.<br>Tight-fitting lid, non-opening once closed.<br>Bright yellow colour, red lid, labelled "Danger Contaminated Sharps".<br>International hazardous waste symbol.<br>Must be securely fixed to a wall, trolley or table top. |                                                                                     |
| Accessories or Related Consumables | Securing bracket and mounting hardware.                                                                                                                                                                                                                                                                                           |                                                                                     |
| Care                               | Seal once $\frac{3}{4}$ full.<br>Standard cleaning and disinfection. Hot water wash (90°C).                                                                                                                                                                                                                                       |                                                                                     |
| Supplier Warranty                  | 1 year on all components (excluding deliberate or accidental damage).                                                                                                                                                                                                                                                             |                                                                                     |

## Broom: interior use

| Catalogue Number | Item Name           | Available on Transversal Contract | Contract Number or Code |
|------------------|---------------------|-----------------------------------|-------------------------|
| PHC-E-006        | Broom: interior use | No                                |                         |

|                                    |                                                                                                                                                                                                                                                     |                                                                                     |
|------------------------------------|-----------------------------------------------------------------------------------------------------------------------------------------------------------------------------------------------------------------------------------------------------|-------------------------------------------------------------------------------------|
| Description                        | Household broom.                                                                                                                                                                                                                                    |  |
| Use                                | For sweeping inside buildings. There is a different heavy-duty broom for external use.                                                                                                                                                              |                                                                                     |
| Clinical or User Specifications    | <p>Robust, non-rusting handle.</p> <p>Replaceable broom head, attached with suitable metal bracket and screws.</p> <p>Soft bristles, for interior use.</p> <p>Protective plastic strip around broom head.</p> <p>Hanging hole at end of handle.</p> |                                                                                     |
| Accessories or Related Consumables |                                                                                                                                                                                                                                                     |                                                                                     |
| Care                               | Standard cleaning and disinfection.                                                                                                                                                                                                                 |                                                                                     |
| Supplier Warranty                  | 1 year on all components (excluding deliberate or accidental damage).                                                                                                                                                                               |                                                                                     |

## Buckets: colour coded

| Catalogue Number | Item Name     | Available on Transversal Contract | Contract Number or Code |
|------------------|---------------|-----------------------------------|-------------------------|
| PHC-E-007        | Bucket: red   | No                                |                         |
| PHC-E-008        | Bucket: blue  | No                                |                         |
| PHC-E-009        | Bucket: green | No                                |                         |

|                                    |                                                                                                                                                                                                                                                                                                                   |
|------------------------------------|-------------------------------------------------------------------------------------------------------------------------------------------------------------------------------------------------------------------------------------------------------------------------------------------------------------------|
| Description                        | <p>Colour-coded bucket: Heavy duty.</p>                                                                                                                                                                                        |
| Use                                | For cleaning of floors, furniture and fittings.                                                                                                                                                                                                                                                                   |
| Clinical or User Specifications    | <p>Rectangular shape, to suit janitor trolley.</p> <p>Used in combination with colour-coded mops and cloths, for cleaning.</p> <p><b>Red bucket:</b> toilet areas.</p> <p><b>Blue bucket:</b> clinical areas and non-clinical service areas.</p> <p><b>Green bucket:</b> bathroom and consulting room basins.</p> |
| Accessories or Related Consumables |                                                                                                                                                                                                                                                                                                                   |
| Care                               | Must be rinsed and dried after use.                                                                                                                                                                                                                                                                               |
| Supplier Warranty                  | 1 year (excluding deliberate or accidental damage).                                                                                                                                                                                                                                                               |

## Dust pan and brush set

| Catalogue Number | Item Name              | Available on Transversal Contract | Contract Number or Code |
|------------------|------------------------|-----------------------------------|-------------------------|
| PHC-E-010        | Dust pan and brush set | No                                |                         |

|                                    |                                                                                                                                                  |                                                                                     |
|------------------------------------|--------------------------------------------------------------------------------------------------------------------------------------------------|-------------------------------------------------------------------------------------|
| Description                        | Dust pan and brush.                                                                                                                              |  |
| Use                                | For collecting dust and particles inside buildings.                                                                                              |                                                                                     |
| Clinical or User Specifications    | Heavy-duty plastic dust pan, with hole in handle for hanging.<br>Heavy-duty soft-bristle, plastic brush with handle. Hole in handle for hanging. |                                                                                     |
| Accessories or Related Consumables |                                                                                                                                                  |                                                                                     |
| Care                               | Standard cleaning and disinfection.                                                                                                              |                                                                                     |
| Supplier Warranty                  | 1 year on all components (excluding deliberate or accidental damage).                                                                            |                                                                                     |

# Mop: colour-coded

| Catalogue Number | Item Name  | Available on Transversal Contract | Contract Number or Code |
|------------------|------------|-----------------------------------|-------------------------|
| PHC-E-015        | Mop: red   | No                                |                         |
| PHC-E-016        | Mop: blue  | No                                |                         |
| PHC-E-017        | Mop: black | No                                |                         |

|                                    |                                                                                                                                                                                                                                     |                                                                                     |
|------------------------------------|-------------------------------------------------------------------------------------------------------------------------------------------------------------------------------------------------------------------------------------|-------------------------------------------------------------------------------------|
| Description                        | Colour-coded mops.                                                                                                                                                                                                                  |  |
| Use                                | For cleaning of floors.                                                                                                                                                                                                             |                                                                                     |
| Clinical or User Specifications    | Used in combination with colour-coded buckets and cloths, for cleaning.<br><b>Red mop:</b> toilet areas.<br><b>Blue mop:</b> clinical areas and non-clinical service areas.<br><b>Black mop</b> (must be labelled): exterior areas. |                                                                                     |
| Accessories or Related Consumables |                                                                                                                                                                                                                                     |                                                                                     |
| Care                               | Must be rinsed and dried after use.                                                                                                                                                                                                 |                                                                                     |
| Supplier Warranty                  | 1 year (excluding deliberate or accidental damage).                                                                                                                                                                                 |                                                                                     |

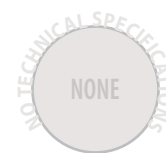

## Mop: static head, complete

| Catalogue Number | Item Name                  | Available on Transversal Contract | Contract Number or Code |
|------------------|----------------------------|-----------------------------------|-------------------------|
| PHC-E-018        | Mop: static head, complete | No                                |                         |

|                                    |                                                                                                                |                                                                                     |
|------------------------------------|----------------------------------------------------------------------------------------------------------------|-------------------------------------------------------------------------------------|
| Description                        | Mop with broad head over which a fitted microfibre cloth is stretched.                                         |  |
| Use                                | For general cleaning of dry floors, dust removal on high fixtures.                                             |                                                                                     |
| Clinical or User Specifications    | Long-handled mop with a flat head. Microfibre cloth is stretched over the head. Cloth is exchanged when dirty. |                                                                                     |
| Accessories or Related Consumables | Microfibre sleeve for mop: static head. PHC-C-210.                                                             |                                                                                     |
| Care                               | Cloths are re-usable. Wash separately from other laundry.                                                      |                                                                                     |
| Supplier Warranty                  | 1 year (excluding deliberate or accidental damage).                                                            |                                                                                     |

# Paper towel dispenser: folded towels

| Catalogue Number | Item Name                            | Available on Transversal Contract | Contract Number or Code |
|------------------|--------------------------------------|-----------------------------------|-------------------------|
| PHC-E-020        | Paper towel dispenser: folded towels | RT 14-2016                        | 47131710-00003          |

|                                    |                                                                                                                             |                                                                                     |
|------------------------------------|-----------------------------------------------------------------------------------------------------------------------------|-------------------------------------------------------------------------------------|
| Description                        | A holder for packs of folded paper towels.                                                                                  |  |
| Use                                | For all areas where there is a hand washbasin.                                                                              |                                                                                     |
| Clinical or User Specifications    | Wall-mounted, polycarbonate dispenser for folded paper towels.<br>Must be fixed to the wall, in proximity to the washbasin. |                                                                                     |
| Accessories or Related Consumables | None.                                                                                                                       |                                                                                     |
| Care                               | Standard cleaning and disinfection.                                                                                         |                                                                                     |
| Supplier Warranty                  | 2 years on all components (excluding accidental or deliberate damage).                                                      |                                                                                     |

## Paper towel dispenser: roll

| Catalogue Number | Item Name                   | Available on Transversal Contract | Contract Number or Code |
|------------------|-----------------------------|-----------------------------------|-------------------------|
| PHC-E-021        | Paper towel dispenser: roll | No                                |                         |

|                                    |                                                                                                                                                                                                                                                                     |                                                                                     |
|------------------------------------|---------------------------------------------------------------------------------------------------------------------------------------------------------------------------------------------------------------------------------------------------------------------|-------------------------------------------------------------------------------------|
| Description                        | A holder for rolls of paper towel.                                                                                                                                                                                                                                  |  |
| Use                                | For all areas where there is a hand washbasin.                                                                                                                                                                                                                      |                                                                                     |
| Clinical or User Specifications    | Simple, heavy-duty stainless steel roll-holder, that will accept non-proprietary standard or large-diameter perforated paper rolls (readily purchasable).<br>Not suitable for industrial-size rolls.<br>Must be affixed to the wall, in proximity to the washbasin. |                                                                                     |
| Accessories or Related Consumables | None.                                                                                                                                                                                                                                                               |                                                                                     |
| Care                               | Standard cleaning and disinfection.                                                                                                                                                                                                                                 |                                                                                     |
| Supplier Warranty                  | 5 years on all components (excluding accidental or deliberate damage).                                                                                                                                                                                              |                                                                                     |



# Soap dispenser

| Catalogue Number | Item Name      | Available on Transversal Contract | Contract Number or Code |
|------------------|----------------|-----------------------------------|-------------------------|
| PHC-E-014        | Soap dispenser | No                                |                         |

|                                    |                                                                                                                                                                                                                                                                                                                     |                                                                                     |
|------------------------------------|---------------------------------------------------------------------------------------------------------------------------------------------------------------------------------------------------------------------------------------------------------------------------------------------------------------------|-------------------------------------------------------------------------------------|
| Description                        | A soap dispenser for washing hands.                                                                                                                                                                                                                                                                                 |  |
| Use                                | For all areas where there is a hand washbasin.                                                                                                                                                                                                                                                                      |                                                                                     |
| Clinical or User Specifications    | Simple, heavy-duty stainless steel cage unit, that will accept non-proprietary, standard replaceable, plastic pump-action bottles.<br>Bottles are re-fillable with bulk-purchased liquid soap.<br>Bottles can be replaced when pump mechanism fails.<br>Must be affixed to the wall, in proximity to the washbasin. |                                                                                     |
| Accessories or Related Consumables | Two empty bottles, wall-mounting hardware.                                                                                                                                                                                                                                                                          |                                                                                     |
| Care                               | Standard cleaning and disinfection.                                                                                                                                                                                                                                                                                 |                                                                                     |
| Supplier Warranty                  | 5 years on metal components (excluding accidental or deliberate damage).                                                                                                                                                                                                                                            |                                                                                     |

# Spray bottle

| Catalogue Number | Item Name                  | Available on Transversal Contract | Contract Number or Code |
|------------------|----------------------------|-----------------------------------|-------------------------|
| PHC-E-022        | Spray bottle: 750ml        | No                                |                         |
| PHC-E-023        | Spray bottle: 2l           | No                                |                         |
| PHC-E-024        | Spray bottle: 10l backpack | No                                |                         |

|                                    |                                                                                                                                                                                                                                                                                                                                                                                      |
|------------------------------------|--------------------------------------------------------------------------------------------------------------------------------------------------------------------------------------------------------------------------------------------------------------------------------------------------------------------------------------------------------------------------------------|
| Description                        | <p>Spray bottles for surface application of cleaning liquids.</p>                                                                                                                                                                                                                                 |
| Use                                | To spray window cleaner, detergents, disinfectants, weed killer, insecticides.                                                                                                                                                                                                                                                                                                       |
| Clinical or User Specifications    | <p>The small size has a simple trigger-action pump mechanism, and is suitable for light, intermittent work.</p> <p>The medium size is for more sustained application – it is pressurised before use with a built-in pump.</p> <p>The large unit is primarily for outdoor use. The unit is pressurised with a built-in pump, and the contents are then applied with a spray wand.</p> |
| Accessories or Related Consumables | None.                                                                                                                                                                                                                                                                                                                                                                                |
| Care                               | Standard cleaning and disinfection.                                                                                                                                                                                                                                                                                                                                                  |
| Supplier Warranty                  | 1 year (excluding accidental or deliberate damage).                                                                                                                                                                                                                                                                                                                                  |

# Squeegee

| Catalogue Number | Item Name        | Available on Transversal Contract | Contract Number or Code |
|------------------|------------------|-----------------------------------|-------------------------|
| PHC-E-150        | Squeegee: window | No                                |                         |

|                                    |                                                                                                                                                                                                                                                                                                                                             |                                                                                    |
|------------------------------------|---------------------------------------------------------------------------------------------------------------------------------------------------------------------------------------------------------------------------------------------------------------------------------------------------------------------------------------------|------------------------------------------------------------------------------------|
| Description                        | Squeegee: medium length handle.                                                                                                                                                                                                                                                                                                             |  |
| Use                                | For cleaning of windows.                                                                                                                                                                                                                                                                                                                    |                                                                                    |
| Clinical or User Specifications    | <p>Squeegee with medium-length handle, for cleaning and drying of windows.</p> <p>Silicon rubber live edge. The squeegee is dragged across the window pane after washing with a cloth and rinsing, to avoid smearing.</p> <p>Handle is sufficiently long enough to reach tops of window panes, but not long enough to twist during use.</p> |                                                                                    |
| Accessories or Related Consumables |                                                                                                                                                                                                                                                                                                                                             |                                                                                    |
| Care                               | Must be rinsed and dried after use.                                                                                                                                                                                                                                                                                                         |                                                                                    |
| Supplier Warranty                  | 1 year (excluding deliberate or accidental damage).                                                                                                                                                                                                                                                                                         |                                                                                    |

# Toilet roll dispenser

| Catalogue Number | Item Name              | Available on Transversal Contract | Contract Number or Code |
|------------------|------------------------|-----------------------------------|-------------------------|
| PHC-E-025        | Dispenser: toilet roll | RT 14-2016                        | 47131710-00000          |

|                                    |                                                                                                                          |                                                                                     |
|------------------------------------|--------------------------------------------------------------------------------------------------------------------------|-------------------------------------------------------------------------------------|
| Description                        | Holder for rolls of toilet paper.                                                                                        |  |
| Use                                | For all areas where there is a toilet.                                                                                   |                                                                                     |
| Clinical or User Specifications    | Wall-mounted stainless steel unit.<br>Capacity 2 rolls.<br>Must be affixed to the wall, in proximity to the toilet bowl. |                                                                                     |
| Accessories or Related Consumables | None.                                                                                                                    |                                                                                     |
| Care                               | Standard cleaning and disinfection.                                                                                      |                                                                                     |
| Supplier Warranty                  | 5 years on all components (excluding accidental or deliberate damage).                                                   |                                                                                     |

# Trolley: janitor

| Catalogue Number | Item Name        | Available on Transversal Contract | Contract Number or Code |
|------------------|------------------|-----------------------------------|-------------------------|
| PHC-E-030        | Trolley: janitor | No                                |                         |

|                                    |                                                                                                                                                                                                                                                                                                                                                                                                                                                                                                                                                                                                                                                                                                                                                                                                                 |                                                                                     |
|------------------------------------|-----------------------------------------------------------------------------------------------------------------------------------------------------------------------------------------------------------------------------------------------------------------------------------------------------------------------------------------------------------------------------------------------------------------------------------------------------------------------------------------------------------------------------------------------------------------------------------------------------------------------------------------------------------------------------------------------------------------------------------------------------------------------------------------------------------------|-------------------------------------------------------------------------------------|
| Description                        | Janitor trolley.                                                                                                                                                                                                                                                                                                                                                                                                                                                                                                                                                                                                                                                                                                                                                                                                |  |
| Use                                | Contains all requirements for efficient cleaning in a mobile unit.                                                                                                                                                                                                                                                                                                                                                                                                                                                                                                                                                                                                                                                                                                                                              |                                                                                     |
| Clinical or User Specifications    | <p>The trolley holds a large refuse bag kept in the open position on the frame by a retainer. There is a sealing lid over the mouth of the bag, to prevent spillage and odours escaping.</p> <p>Alongside the receptacle are three shelves. The top shelf is sunken, to accommodate spray bottles and other containers. The middle and lower shelves are enclosed by a rail on all sides, and house cloths and brushes.</p> <p>The free edge of the top shelf has hooks or snap holders, into which mop handles can be secured when the unit is moving.</p> <p>Space for three mops (or mop/broom combinations).</p> <p>The floor of the trolley extends beyond the shelves, to provide a support for two heavy-duty buckets.</p> <p>The trolley is castor-mounted for easy movement into and out of rooms.</p> |                                                                                     |
| Accessories or Related Consumables | <p>Colour-coded Mops, buckets, spray bottles to be ordered as separate items – see Table of Contents at the beginning of this section.</p> <p>Cloths to be ordered under consumables.</p>                                                                                                                                                                                                                                                                                                                                                                                                                                                                                                                                                                                                                       |                                                                                     |
| Care                               | <p>Clean after use as with standard cleaning and disinfectant solutions.</p> <p>Refuse bag disposable. Replace after use.</p>                                                                                                                                                                                                                                                                                                                                                                                                                                                                                                                                                                                                                                                                                   |                                                                                     |
| Supplier Warranty                  | 2 years on all components (excluding deliberate or accidental damage).                                                                                                                                                                                                                                                                                                                                                                                                                                                                                                                                                                                                                                                                                                                                          |                                                                                     |

# Cold chain

## Cooler box

| Catalogue Number | Item Name          | Available on Transversal Contract | Contract Number or Code |
|------------------|--------------------|-----------------------------------|-------------------------|
| PHC-E-035        | Vaccine cooler box | No                                |                         |

|                                    |                                                                                                                                                                                                                                                                                                                                                                                                                                                                                                                                                                                                              |                                                                                      |
|------------------------------------|--------------------------------------------------------------------------------------------------------------------------------------------------------------------------------------------------------------------------------------------------------------------------------------------------------------------------------------------------------------------------------------------------------------------------------------------------------------------------------------------------------------------------------------------------------------------------------------------------------------|--------------------------------------------------------------------------------------|
| Description                        | Insulated container for vaccine transport.                                                                                                                                                                                                                                                                                                                                                                                                                                                                                                                                                                   |  |
| Use                                | For maintenance of the cold chain when vaccine is transported to the field.                                                                                                                                                                                                                                                                                                                                                                                                                                                                                                                                  |                                                                                      |
| Clinical or User Specifications    | <p>The purpose of this item is to keep the temperature of transported vaccine within specified limits. It is vital that the vaccine should not be frozen, as this will inactivate freeze-sensitive and lyophilised vaccines.</p> <p>To compensate for the effects of opening and closing the box, a cold-life requirement of 24 hours has been selected, based on the assumption that the vaccines will be used within 12 hours of packing.</p> <p>A foam pad is provided, to place over the cold packs, during an immunisation session. Placing the vaccine directly on an ice-pack is not recommended.</p> |                                                                                      |
| Accessories or Related Consumables | Water packs for cooler box. PHC-C-203.                                                                                                                                                                                                                                                                                                                                                                                                                                                                                                                                                                       |                                                                                      |
| Care                               | <p>Clean after use as per manufacturer's instructions.</p> <p>Fill water-packs with tap water and cool in refrigerator as per supplier's instructions. Do not freeze.</p> <p>Do not replace water-packs with pre-filled types, as these may freeze below 0 degrees, and inactivate the vaccine.</p>                                                                                                                                                                                                                                                                                                          |                                                                                      |
| Supplier Warranty                  | 1 year (excluding deliberate or accidental damage).                                                                                                                                                                                                                                                                                                                                                                                                                                                                                                                                                          |                                                                                      |

## Thermometer: data logging

TECHNICAL SPECIFICATIONS  
page  
682

| Catalogue Number | Item Name                | Available on Transversal Contract | Contract Number or Code |
|------------------|--------------------------|-----------------------------------|-------------------------|
| PHC-E-042        | Data logging thermometer | No                                |                         |

|                                    |                                                                                                                                                                                                                                                                                                                                                                                                                                                                                                                                                                                                                                                                                 |
|------------------------------------|---------------------------------------------------------------------------------------------------------------------------------------------------------------------------------------------------------------------------------------------------------------------------------------------------------------------------------------------------------------------------------------------------------------------------------------------------------------------------------------------------------------------------------------------------------------------------------------------------------------------------------------------------------------------------------|
| Description                        | <p>Thermometer which records temperature at pre-set intervals.</p>                                                                                                                                                                                                                                                                                                                                                                                                                                                                                                                           |
| Use                                | For use with vaccine and medicine refrigerators.                                                                                                                                                                                                                                                                                                                                                                                                                                                                                                                                                                                                                                |
| Clinical or User Specifications    | <p>The thermometer has a temperature probe which is placed inside the refrigerator – the connecting wire is very thin, and will not interfere with the door seal.</p> <p>The body of the thermometer has a display, and will be mounted on or near the exterior of the refrigerator.</p> <p>The instrument records temperatures at pre-set intervals, and stores the readings for a month – thereafter it overwrites the readings in memory with new readings.</p> <p>Permits scrolling through readings for previous days.</p> <p>A monthly report can be downloaded to a computer.</p> <p>The instrument has an internal non-replaceable battery with a 2-year life-span.</p> |
| Accessories or Related Consumables | Temperature probe.                                                                                                                                                                                                                                                                                                                                                                                                                                                                                                                                                                                                                                                              |
| Care                               | <p>Standard cleaning and disinfection.</p> <p><b>THE INSTRUMENT MUST BE REPLACED EVERY TWO YEARS.</b></p>                                                                                                                                                                                                                                                                                                                                                                                                                                                                                                                                                                       |
| Supplier Warranty                  | 2 years (excluding deliberate or accidental damage).                                                                                                                                                                                                                                                                                                                                                                                                                                                                                                                                                                                                                            |

# Thermometer: refrigerator

| Catalogue Number | Item Name                 | Available on Transversal Contract | Contract Number or Code |
|------------------|---------------------------|-----------------------------------|-------------------------|
| PHC-E-153        | Thermometer: refrigerator | No                                |                         |

|                                    |                                                                                                                                                                                 |                                                                                     |
|------------------------------------|---------------------------------------------------------------------------------------------------------------------------------------------------------------------------------|-------------------------------------------------------------------------------------|
| Description                        | Simple thermometer for use inside a standard refrigerator.                                                                                                                      |  |
| Use                                | To determine that the thermostat setting delivers the desired temperature range.                                                                                                |                                                                                     |
| Clinical or User Specifications    | Indicates temperature inside the refrigerator at any given time. Does not record maximum and minimum temperatures.<br>Analogue-type. No batteries required.<br>Stainless steel. |                                                                                     |
| Accessories or Related Consumables |                                                                                                                                                                                 |                                                                                     |
| Care                               | Do not drop.                                                                                                                                                                    |                                                                                     |
| Supplier Warranty                  | 2 years (excluding deliberate or accidental damage).                                                                                                                            |                                                                                     |



# Thermometer: room

| Catalogue Number | Item Name        | Available on Transversal Contract | Contract Number or Code |
|------------------|------------------|-----------------------------------|-------------------------|
| PHC-E-114        | Room thermometer | No                                |                         |

|                                    |                                                                                                                                                                                                                                                                                                                                                                 |                                                                                     |
|------------------------------------|-----------------------------------------------------------------------------------------------------------------------------------------------------------------------------------------------------------------------------------------------------------------------------------------------------------------------------------------------------------------|-------------------------------------------------------------------------------------|
| Description                        | Electronic room thermometer.                                                                                                                                                                                                                                                                                                                                    |  |
| Use                                | Used to monitor room temperature in medicine storage locations.                                                                                                                                                                                                                                                                                                 |                                                                                     |
| Clinical or User Specifications    | <p>The instrument records the minimum and maximum temperatures in a room, over the preceding period. The period is reset, once a daily reading has been noted. In the case of a week-end, the maximum and minimum recorded temperatures will have been recorded since the Friday.</p> <p>Battery-operated, batteries need to be replaced at least annually.</p> |                                                                                     |
| Accessories or Related Consumables | None.                                                                                                                                                                                                                                                                                                                                                           |                                                                                     |
| Care                               | <p>Standard cleaning and disinfection.</p> <p>Replace battery(ies) with same model button-type cells, when prompted to do so by the battery indicator.</p>                                                                                                                                                                                                      |                                                                                     |
| Supplier Warranty                  | 1 year (excluding deliberate or accidental damage).                                                                                                                                                                                                                                                                                                             |                                                                                     |

# Fire safety

TECHNICAL SPECIFICATIONS  
page  
690

## Fire extinguisher

| Catalogue Number | Item Name         | Available on Transversal Contract | Contract Number or Code |
|------------------|-------------------|-----------------------------------|-------------------------|
| PHC-E-043        | Fire extinguisher | No                                |                         |

|                                    |                                                                                                                                                                                                                                                                                                            |                                                                                      |
|------------------------------------|------------------------------------------------------------------------------------------------------------------------------------------------------------------------------------------------------------------------------------------------------------------------------------------------------------|--------------------------------------------------------------------------------------|
| Description                        | Handheld firefighting equipment.                                                                                                                                                                                                                                                                           |  |
| Use                                | For protection of patients, staff and state assets, against fire.                                                                                                                                                                                                                                          |                                                                                      |
| Clinical or User Specifications    | <b>Fire extinguisher:</b> there should be one Carbon dioxide extinguisher of 2,5kg for every 250sq. metres. Maximum distance of travel to reach the nearest extinguisher = 10m (Note, this is approximate, and will depend on the specific fire loading of the facility).                                  |                                                                                      |
| Accessories or Related Consumables | Extinguishers supplied with mounting brackets and approved signage.                                                                                                                                                                                                                                        |                                                                                      |
| Care                               | Standard cleaning and disinfection.                                                                                                                                                                                                                                                                        |                                                                                      |
| Maintenance                        | After delivery, it is the legal responsibility of the building owner to arrange maintenance of fire extinguishers.<br>Extinguishers require annual or biannual service, depending on the model. Sticker showing date of last service and latest date for next service, to be affixed to each extinguisher. |                                                                                      |
| Supplier Warranty                  | N/A.                                                                                                                                                                                                                                                                                                       |                                                                                      |

# Fire hose on reel

| Catalogue Number | Item Name         | Available on Transversal Contract | Contract Number or Code |
|------------------|-------------------|-----------------------------------|-------------------------|
| PHC-E-044        | Fire hose on reel | No                                |                         |

|                                    |                                                                                                                                                                                                                                     |                                                                                     |
|------------------------------------|-------------------------------------------------------------------------------------------------------------------------------------------------------------------------------------------------------------------------------------|-------------------------------------------------------------------------------------|
| Description                        | High-pressure, double-wall non-kinking rubber hose, directly connected to mains supply with swivel connector. On reel. Complete with nozzle.                                                                                        |  |
| Use                                | For protection of patients, staff and state assets, against fire.                                                                                                                                                                   |                                                                                     |
| Clinical or User Specifications    | <b>Fire hose and reel:</b> 20mm x 30m hose with fittings. Maximum distance from any point on the same floor to the fire hose-reel = 30m. (Note, this is approximate, and will depend on the specific fire loading of the facility). |                                                                                     |
| Accessories or Related Consumables | Approved signage.                                                                                                                                                                                                                   |                                                                                     |
| Care                               | Standard cleaning and disinfection.                                                                                                                                                                                                 |                                                                                     |
| Maintenance                        | Hose and reel require periodic pressure testing by a competent technician. Consult the local Fire Department.                                                                                                                       |                                                                                     |
| Supplier Warranty                  | N/A.                                                                                                                                                                                                                                |                                                                                     |

# Smoke alarm

| Catalogue Number | Item Name   | Available on Transversal Contract | Contract Number or Code |
|------------------|-------------|-----------------------------------|-------------------------|
| PHC-E-045        | Smoke alarm | No                                |                         |

|                                    |                                                                                                                                                                                                    |                                                                                     |
|------------------------------------|----------------------------------------------------------------------------------------------------------------------------------------------------------------------------------------------------|-------------------------------------------------------------------------------------|
| Description                        | Standard firefighting equipment.                                                                                                                                                                   |  |
| Use                                | For protection of patients, staff and state assets, against fire.                                                                                                                                  |                                                                                     |
| Clinical or User Specifications    | <b>Smoke alarm:</b> ceiling mounted, battery operated. Minimum 110 decibel loudness. Red LED to indicate that unit is operational. One per room that is completely enclosed when the door is shut. |                                                                                     |
| Accessories or Related Consumables | Supplied and installed complete with batteries.                                                                                                                                                    |                                                                                     |
| Care                               | Standard cleaning and disinfection.<br>Change battery in smoke alarm when the pilot light shows "Low Battery" state. Refer to departmental technical personnel.                                    |                                                                                     |
| Supplier Warranty                  | 1 year.                                                                                                                                                                                            |                                                                                     |

# Garden

TECHNICAL SPECIFICATIONS  
page  
693

## Bins: waste, heavy duty

| Catalogue Number | Item Name                                         | Available on Transversal Contract | Contract Number or Code |
|------------------|---------------------------------------------------|-----------------------------------|-------------------------|
| PHC-E-046        | Bin: general waste, 240l black, with wheels       | No                                |                         |
| PHC-E-047        | Bin: healthcare risk waste, 140l red, with wheels | No                                |                         |
| PHC-E-048        | Bin: general waste, 140l green, with wheels       | No                                |                         |
| PHC-E-049        | Bin: general waste, 90l black, no wheels          | No                                |                         |

|                                    |                                                                                                                                                                                                                                                                                                   |                                                                                      |
|------------------------------------|---------------------------------------------------------------------------------------------------------------------------------------------------------------------------------------------------------------------------------------------------------------------------------------------------|--------------------------------------------------------------------------------------|
| Description                        | Bins for management of various categories of waste.                                                                                                                                                                                                                                               |  |
| Use                                | Waste management, including garden waste.                                                                                                                                                                                                                                                         |                                                                                      |
| Clinical or User Specifications    | <p>All bins are made from durable plastic, with well-fitting, hinged lids. All except the 90l. bin have wheels to facilitate movement.</p> <p>Black 240l bin is used for garden waste.</p> <p>Red 140l bin is intended for medical waste.</p> <p>Black 90l bin is intended for general waste.</p> |                                                                                      |
| Accessories or Related Consumables |                                                                                                                                                                                                                                                                                                   |                                                                                      |
| Care                               | Standard cleaning and disinfection.                                                                                                                                                                                                                                                               |                                                                                      |
| Supplier Warranty                  | 2 years.                                                                                                                                                                                                                                                                                          |                                                                                      |

## Broom

| Catalogue Number | Item Name     | Available on Transversal Contract | Contract Number or Code |
|------------------|---------------|-----------------------------------|-------------------------|
| PHC-E-052        | Broom: garden | No                                |                         |

|                                    |                                                               |                                                                                     |
|------------------------------------|---------------------------------------------------------------|-------------------------------------------------------------------------------------|
| Description                        | Garden broom.                                                 |  |
| Use                                | For tidying external areas.                                   |                                                                                     |
| Clinical or User Specifications    | Heavy duty, large broom.<br>Wooden handle.<br>Stiff bristles. |                                                                                     |
| Accessories or Related Consumables | None.                                                         |                                                                                     |
| Care                               |                                                               |                                                                                     |
| Supplier Warranty                  | None.                                                         |                                                                                     |

## Edge Trimmer/brush cutter: heavy duty

| Catalogue Number | Item Name                                     | Available on Transversal Contract | Contract Number or Code |
|------------------|-----------------------------------------------|-----------------------------------|-------------------------|
| PHC-E-050        | Edge trimmer/brush cutter: petrol, heavy duty | No                                |                         |

|                                    |                                                                                                                                                                                                                                                                                                         |                                                                                     |
|------------------------------------|---------------------------------------------------------------------------------------------------------------------------------------------------------------------------------------------------------------------------------------------------------------------------------------------------------|-------------------------------------------------------------------------------------|
| Description                        | Edge trimmer/brush cutter: petrol, heavy duty.                                                                                                                                                                                                                                                          |  |
| Use                                | Used to trim borders, clear pathways and weed beds, and trim grass in areas not suitable for lawnmowers.                                                                                                                                                                                                |                                                                                     |
| Clinical or User Specifications    | Interchangeable heads: solid blade for heavier long grass and thin bushes, nylon line for general trimming and edging.                                                                                                                                                                                  |                                                                                     |
| Accessories or Related Consumables | Harness, safety glasses, hearing protectors, tool kit, manual.<br>Fuel mixing bottle.<br>100m recommended line.<br>Blade and line heads.                                                                                                                                                                |                                                                                     |
| Care                               | Clean after every use to prevent corrosion.<br>Clean air filter, and soak in petrol before each use.<br>Requires a mixture of petrol and 2-stroke oil, mixed in correct proportions as per supplier's instructions.<br>Have unit serviced during winter months every year.<br>Procure line as required. |                                                                                     |
| Supplier Warranty                  | 2 years (excluding deliberate or accidental damage).                                                                                                                                                                                                                                                    |                                                                                     |

## Extension cable: electrical, garden

| Catalogue Number | Item Name                           | Available on Transversal Contract | Contract Number or Code |
|------------------|-------------------------------------|-----------------------------------|-------------------------|
| PHC-E-051        | Extension cable: electrical, garden | No                                |                         |

|                                    |                                                                                                                                                                     |                                                                                     |
|------------------------------------|---------------------------------------------------------------------------------------------------------------------------------------------------------------------|-------------------------------------------------------------------------------------|
| Description                        | Extension cable: electrical, garden.                                                                                                                                |  |
| Use                                | Electrical extension for use with electric-powered lawn mower.                                                                                                      |                                                                                     |
| Clinical or User Specifications    | This extension has a normal 15A 3-pin plug on one end, and a Female Shuko connector on the other. The Shuko connector is safer than other types when used outdoors. |                                                                                     |
| Accessories or Related Consumables | None.                                                                                                                                                               |                                                                                     |
| Care                               | Coil without twisting when not in use.<br>If accidentally cut during use, have it properly mended.                                                                  |                                                                                     |
| Supplier Warranty                  | 1 year (excluding deliberate or accidental damage).                                                                                                                 |                                                                                     |



# Fork

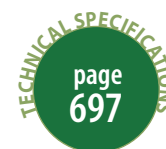

| Catalogue Number | Item Name               | Available on Transversal Contract | Contract Number or Code |
|------------------|-------------------------|-----------------------------------|-------------------------|
| PHC-E-053        | Fork: garden, 4-pronged | No                                |                         |

|                                    |                                                     |                                                                                     |
|------------------------------------|-----------------------------------------------------|-------------------------------------------------------------------------------------|
| Description                        | Garden fork.                                        |  |
| Use                                | For gardening.                                      |                                                                                     |
| Clinical or User Specifications    | Durable 4-pronged garden fork.                      |                                                                                     |
| Accessories or Related Consumables | None.                                               |                                                                                     |
| Care                               | Clean after use to prevent metal corrosion.         |                                                                                     |
| Supplier Warranty                  | 1 year (excluding deliberate or accidental damage). |                                                                                     |

## Gardening set: 3-piece

| Catalogue Number | Item Name           | Available on Transversal Contract | Contract Number or Code |
|------------------|---------------------|-----------------------------------|-------------------------|
| PHC-E-059        | Garden set: 3-piece | No                                |                         |

|                                    |                                                     |                                                                                     |
|------------------------------------|-----------------------------------------------------|-------------------------------------------------------------------------------------|
| Description                        | 3-piece garden set.                                 |  |
| Use                                | For planting and tending to flower beds and pots.   |                                                                                     |
| Clinical or User Specifications    | Heavy duty hand trowel, hand fork and weed grabber. |                                                                                     |
| Accessories or Related Consumables | None.                                               |                                                                                     |
| Care                               | Clean after use to prevent metal corrosion.         |                                                                                     |
| Supplier Warranty                  | 1 year (excluding deliberate or accidental damage). |                                                                                     |

# Hedge clipper: shears, manual

| Catalogue Number | Item Name    | Available on Transversal Contract | Contract Number or Code |
|------------------|--------------|-----------------------------------|-------------------------|
| PHC-E-060        | Hedge shears | No                                |                         |

|                                    |                                                     |                                                                                     |
|------------------------------------|-----------------------------------------------------|-------------------------------------------------------------------------------------|
| Description                        | Hedge shears.                                       |  |
| Use                                | For trimming bushes and hedges.                     |                                                                                     |
| Clinical or User Specifications    | Durable hedge-trimming shears.                      |                                                                                     |
| Accessories or Related Consumables | None.                                               |                                                                                     |
| Care                               | Clean after use to prevent metal corrosion.         |                                                                                     |
| Supplier Warranty                  | 1 year (excluding deliberate or accidental damage). |                                                                                     |

# Hoe

| Catalogue Number | Item Name | Available on Transversal Contract | Contract Number or Code |
|------------------|-----------|-----------------------------------|-------------------------|
| PHC-E-061        | Hoe       | No                                |                         |

|                                    |                                                     |                                                                                     |
|------------------------------------|-----------------------------------------------------|-------------------------------------------------------------------------------------|
| Description                        | Hoe.                                                |  |
| Use                                | For planting and weed removal.                      |                                                                                     |
| Clinical or User Specifications    | Heavy duty hoe.                                     |                                                                                     |
| Accessories or Related Consumables | None.                                               |                                                                                     |
| Care                               | Clean after use to prevent metal corrosion.         |                                                                                     |
| Supplier Warranty                  | 1 year (excluding deliberate or accidental damage). |                                                                                     |

# Hosepipe: garden

| Catalogue Number | Item Name        | Available on Transversal Contract | Contract Number or Code |
|------------------|------------------|-----------------------------------|-------------------------|
| PHC-E-062        | Hosepipe: garden | No                                |                         |

|                                    |                                                                                                                                                                      |                                                                                     |
|------------------------------------|----------------------------------------------------------------------------------------------------------------------------------------------------------------------|-------------------------------------------------------------------------------------|
| Description                        | Hosepipe: Garden, with tap fittings.                                                                                                                                 |  |
| Use                                | Used to water plants and for external cleaning.                                                                                                                      |                                                                                     |
| Clinical or User Specifications    | 50m length, 20mm diameter reinforced plastic.                                                                                                                        |                                                                                     |
| Accessories or Related Consumables | Tap connector, quick-connector, multi-pattern spray head, wall-mounted hose holder, spare washer kit, hose joiner (for mending), two good quality worm-drive clamps. |                                                                                     |
| Care                               | Coil loosely on wall-mounted holder when not in use.                                                                                                                 |                                                                                     |
| Supplier Warranty                  | 1 year (excluding deliberate or accidental damage).                                                                                                                  |                                                                                     |

## Lawn mower: Electric, heavy duty

| Catalogue Number | Item Name                        | Available on Transversal Contract | Contract Number or Code |
|------------------|----------------------------------|-----------------------------------|-------------------------|
| PHC-E-063        | Lawn mower: electric, heavy duty | No                                |                         |

|                                    |                                                                                                                                                                                                                                                                                                                                                              |                                                                                     |
|------------------------------------|--------------------------------------------------------------------------------------------------------------------------------------------------------------------------------------------------------------------------------------------------------------------------------------------------------------------------------------------------------------|-------------------------------------------------------------------------------------|
| Description                        | Lawn mower with electric motor, suitable for smaller premises.                                                                                                                                                                                                                                                                                               |  |
| Use                                | For maintaining lawns, up to about 4000m².                                                                                                                                                                                                                                                                                                                   |                                                                                     |
| Clinical or User Specifications    | The maximum allowable cable length is 40m, i.e. the cable supplied with the mower plus a 20m extension. If this combined length does not permit the lawnmower to reach all the borders of the lawn, a petrol-driven model should be selected.                                                                                                                |                                                                                     |
| Accessories or Related Consumables | 20m cable (replaceable if damaged), with a male Shuko plug at one end. This cable is designed to be used with an extension cable with a female Shuko plug. Shuko plugs have been specified, as they are safer and more durable for this type of use.                                                                                                         |                                                                                     |
| Care                               | <p>The machine must be cleaned after each use, to prevent rusting of metal components.</p> <p>Keep cables from twisting excessively. Wrap the cable on the machine as instructed, after use.</p> <p>If cables get frayed or cut, have them replaced. Otherwise there is a danger of electric shock.</p> <p>Blades must be replaced at least once a year.</p> |                                                                                     |
| Supplier Warranty                  | 2 years (excluding wearable items (cables and blades) and deliberate or accidental damage).                                                                                                                                                                                                                                                                  |                                                                                     |

# Lawn mower: petrol, heavy duty

| Catalogue Number | Item Name                     | Available on Transversal Contract | Contract Number or Code |
|------------------|-------------------------------|-----------------------------------|-------------------------|
| PHC-E-064        | Lawnmower: petrol, heavy duty | No                                |                         |

|                                    |                                                                                                                                                                                                                                                                                                                                                                                                                                                                   |                                                                                     |
|------------------------------------|-------------------------------------------------------------------------------------------------------------------------------------------------------------------------------------------------------------------------------------------------------------------------------------------------------------------------------------------------------------------------------------------------------------------------------------------------------------------|-------------------------------------------------------------------------------------|
| Description                        | Lawnmower: petrol, heavy duty.                                                                                                                                                                                                                                                                                                                                                                                                                                    |  |
| Use                                | Used to trim borders, clear pathways and weed beds, and trim grass in areas not suitable for lawnmowers.                                                                                                                                                                                                                                                                                                                                                          |                                                                                     |
| Clinical or User Specifications    | This model is for use on larger premises (>4000 sq. metres), or where electric power is unreliable. Can tolerate some unevenness of ground, but not large stones (use brush-cutter).                                                                                                                                                                                                                                                                              |                                                                                     |
| Accessories or Related Consumables | Safety glasses, hearing protectors, tool kit, manual.<br>Spare air cleaner.<br>Spare set of blades.<br>Petrol "jerry can".                                                                                                                                                                                                                                                                                                                                        |                                                                                     |
| Care                               | Clean after every use to prevent corrosion.<br>Clean air filter, and soak in petrol before each use. Swop with spare air cleaner during heavy use. Wash and dry after use.<br>Requires regular petrol.<br>Engine oil level should be checked before each use, topped up as required.<br>Oil must be changed as per supplier's instructions.<br>Have unit serviced during winter months every year.<br>Change blades when worn beyond limit specified by supplier. |                                                                                     |
| Supplier Warranty                  | 2 years (excluding deliberate or accidental damage).                                                                                                                                                                                                                                                                                                                                                                                                              |                                                                                     |

# Pick mattock

| Catalogue Number | Item Name    | Available on Transversal Contract | Contract Number or Code |
|------------------|--------------|-----------------------------------|-------------------------|
| PHC-E-065        | Pick mattock | No                                |                         |

|                                    |                                                                                                    |                                                                                     |
|------------------------------------|----------------------------------------------------------------------------------------------------|-------------------------------------------------------------------------------------|
| Description                        | Pick mattock.                                                                                      |  |
| Use                                | For loosening ground, cutting and chopping.                                                        |                                                                                     |
| Clinical or User Specifications    | Diamond point is used to break up ground, mattock blade breaks up ground and cuts edges of a hole. |                                                                                     |
| Accessories or Related Consumables | None.                                                                                              |                                                                                     |
| Care                               |                                                                                                    |                                                                                     |
| Supplier Warranty                  | 1 year on head and handle (excluding deliberate and accidental damage).                            |                                                                                     |



## Rake: leaf and grass, heavy duty

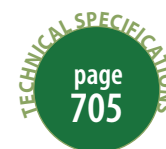

| Catalogue Number | Item Name                        | Available on Transversal Contract | Contract Number or Code |
|------------------|----------------------------------|-----------------------------------|-------------------------|
| PHC-E-054        | Rake: leaf and grass, heavy duty | No                                |                         |

|                                    |                                                                                                                |                                                                                     |
|------------------------------------|----------------------------------------------------------------------------------------------------------------|-------------------------------------------------------------------------------------|
| Description                        | Leaf/grass rake.                                                                                               |  |
| Use                                | For raking up leaves and lawn clippings.                                                                       |                                                                                     |
| Clinical or User Specifications    | Durable rake for gathering leaves or lawn clippings.                                                           |                                                                                     |
| Accessories or Related Consumables | None.                                                                                                          |                                                                                     |
| Care                               | Do not use for other purposes – teeth are flexible and fragile.<br>Clean after use to prevent metal corrosion. |                                                                                     |
| Supplier Warranty                  | 1 year (excluding deliberate or accidental damage).                                                            |                                                                                     |

## Rake: steel, heavy duty

| Catalogue Number | Item Name               | Available on Transversal Contract | Contract Number or Code |
|------------------|-------------------------|-----------------------------------|-------------------------|
| PHC-E-055        | Rake: steel, heavy duty | No                                |                         |

|                                    |                                                                          |                                                                                     |
|------------------------------------|--------------------------------------------------------------------------|-------------------------------------------------------------------------------------|
| Description                        | Garden rake.                                                             |  |
| Use                                | For breaking up earth clods, removal of stones, and levelling of ground. |                                                                                     |
| Clinical or User Specifications    | Durable garden rake.<br>All-metal construction.                          |                                                                                     |
| Accessories or Related Consumables | None.                                                                    |                                                                                     |
| Care                               | Clean after use to prevent metal corrosion.                              |                                                                                     |
| Supplier Warranty                  | 1 year (excluding deliberate or accidental damage).                      |                                                                                     |

## Shovel: square mouth

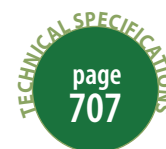

| Catalogue Number | Item Name            | Available on Transversal Contract | Contract Number or Code |
|------------------|----------------------|-----------------------------------|-------------------------|
| PHC-E-056        | Shovel: square mouth | No                                |                         |

|                                    |                                                     |                                                                                     |
|------------------------------------|-----------------------------------------------------|-------------------------------------------------------------------------------------|
| Description                        | Garden shovel: square mouth.                        |  |
| Use                                | For gardening.                                      |                                                                                     |
| Clinical or User Specifications    | Durable garden shovel.                              |                                                                                     |
| Accessories or Related Consumables | None.                                               |                                                                                     |
| Care                               | Clean after use to prevent metal corrosion.         |                                                                                     |
| Supplier Warranty                  | 1 year (excluding deliberate or accidental damage). |                                                                                     |

# Slasher

| Catalogue Number | Item Name       | Available on Transversal Contract | Contract Number or Code |
|------------------|-----------------|-----------------------------------|-------------------------|
| PHC-E-057        | Slasher: garden | No                                |                         |

|                                    |                                                                    |                                                                                     |
|------------------------------------|--------------------------------------------------------------------|-------------------------------------------------------------------------------------|
| Description                        | Garden slasher.                                                    |  |
| Use                                | For hacking long grass and weeds.                                  |                                                                                     |
| Clinical or User Specifications    | Tempered steel blade with ergonomic grip in wood or moulded nylon. |                                                                                     |
| Accessories or Related Consumables | None.                                                              |                                                                                     |
| Care                               | Clean after use to prevent metal corrosion.                        |                                                                                     |
| Supplier Warranty                  | 1 year (excluding deliberate or accidental damage).                |                                                                                     |

# Spade

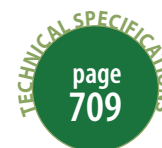

| Catalogue Number | Item Name    | Available on Transversal Contract | Contract Number or Code |
|------------------|--------------|-----------------------------------|-------------------------|
| PHC-E-058        | Garden spade | No                                |                         |

|                                    |                                                     |                                                                                     |
|------------------------------------|-----------------------------------------------------|-------------------------------------------------------------------------------------|
| Description                        | Garden spade.                                       |  |
| Use                                | For gardening.                                      |                                                                                     |
| Clinical or User Specifications    | Durable 4-pronged garden fork.                      |                                                                                     |
| Accessories or Related Consumables | None.                                               |                                                                                     |
| Care                               | Clean after use to prevent metal corrosion.         |                                                                                     |
| Supplier Warranty                  | 1 year (excluding deliberate or accidental damage). |                                                                                     |

## Watering can

| Catalogue Number | Item Name    | Available on Transversal Contract | Contract Number or Code |
|------------------|--------------|-----------------------------------|-------------------------|
| PHC-E-066        | Watering can | No                                |                         |

|                                    |                                                                                                                 |                                                                                     |
|------------------------------------|-----------------------------------------------------------------------------------------------------------------|-------------------------------------------------------------------------------------|
| Description                        | Watering can.                                                                                                   |  |
| Use                                | Used to water plants.                                                                                           |                                                                                     |
| Clinical or User Specifications    | Galvanised iron watering can, with detachable rose for sprinkling seedlings, or for applying diluted chemicals. |                                                                                     |
| Accessories or Related Consumables | Detachable rose.                                                                                                |                                                                                     |
| Care                               | Dry after every use to prevent corrosion.                                                                       |                                                                                     |
| Supplier Warranty                  | 1 year (excluding deliberate or accidental damage).                                                             |                                                                                     |

# Wheelbarrow

| Catalogue Number | Item Name    | Available on Transversal Contract | Contract Number or Code |
|------------------|--------------|-----------------------------------|-------------------------|
| PHC-E-067        | Wheel barrow | No                                |                         |

|                                    |                                                     |                                                                                     |
|------------------------------------|-----------------------------------------------------|-------------------------------------------------------------------------------------|
| Description                        | Wheel barrow.                                       |  |
| Use                                | For gardening and general maintenance work.         |                                                                                     |
| Clinical or User Specifications    | Heavy-duty wheelbarrow with solid rubber tyre.      |                                                                                     |
| Accessories or Related Consumables | None.                                               |                                                                                     |
| Care                               | Clean after use to prevent metal corrosion.         |                                                                                     |
| Supplier Warranty                  | 1 year (excluding deliberate or accidental damage). |                                                                                     |

# Information and Communications Technology

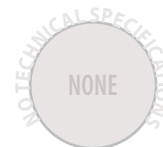

| Catalogue Number | Item Name                                | Available on Transversal Contract                          | Contract Number or Code |
|------------------|------------------------------------------|------------------------------------------------------------|-------------------------|
| PHC-E-088        | Personal computer                        | National/Provincial contracts                              |                         |
| PHC-E-089        | Multifunction printer/scanner/copier/fax | Provincial contracts                                       |                         |
| PHC-E-090        | SMS results printer                      | Supplied by NHLS                                           |                         |
| PHC-E-091        | SVS scanner                              | Supplied as part of Pharmaceutical Supply Chain initiative |                         |
|                  |                                          |                                                            |                         |

These items are from external suppliers. Specifications and contract arrangements are unique to provinces and suppliers.

The items are listed here for completeness and cross-reference.



# Kitchen

TECHNICAL SPECIFICATIONS  
page  
712

## Kettle: electric

| Catalogue Number | Item Name        | Available on Transversal Contract | Contract Number or Code |
|------------------|------------------|-----------------------------------|-------------------------|
| PHC-E-092        | Kettle: electric | No                                |                         |

|                                    |                                                                                                        |                                                                                      |
|------------------------------------|--------------------------------------------------------------------------------------------------------|--------------------------------------------------------------------------------------|
| Description                        | Electric kettle.                                                                                       |  |
| Use                                | For boiling small volumes of water.                                                                    |                                                                                      |
| Clinical or User Specifications    | Stainless steel body and lid. Auto switch-off.<br>Cordless type.<br>1,7l.<br>Rapid-boiling. 2000Watts. |                                                                                      |
| Accessories or Related Consumables | None.                                                                                                  |                                                                                      |
| Care                               | De-scale 6-monthly to maintain efficiency – more often in hard water areas.                            |                                                                                      |
| Supplier Warranty                  | 1 year (excluding deliberate or accidental damage).                                                    |                                                                                      |

## Rack: dish

| Catalogue Number | Item Name  | Available on Transversal Contract | Contract Number or Code |
|------------------|------------|-----------------------------------|-------------------------|
| PHC-E-093        | Rack: dish | No                                |                         |

|                                    |                                                     |                                                                                     |
|------------------------------------|-----------------------------------------------------|-------------------------------------------------------------------------------------|
| Description                        | Dish drying rack.                                   |  |
| Use                                | For air-drying of washed crockery.                  |                                                                                     |
| Clinical or User Specifications    | Stainless steel counter-top rack.                   |                                                                                     |
| Accessories or Related Consumables | None.                                               |                                                                                     |
| Care                               | Standard cleaning and disinfection.                 |                                                                                     |
| Supplier Warranty                  | 1 year (excluding deliberate or accidental damage). |                                                                                     |

# Rack: cutlery

| Catalogue Number | Item Name     | Available on Transversal Contract | Contract Number or Code |
|------------------|---------------|-----------------------------------|-------------------------|
| PHC-E-094        | Rack: cutlery | No                                |                         |

|                                    |                                                      |                                                                                     |
|------------------------------------|------------------------------------------------------|-------------------------------------------------------------------------------------|
| Description                        | Cutlery drying rack.                                 |  |
| Use                                | For air-drying of washed cutlery.                    |                                                                                     |
| Clinical or User Specifications    | Stainless steel counter-top rack.                    |                                                                                     |
| Accessories or Related Consumables | None.                                                |                                                                                     |
| Care                               | Standard cleaning and disinfection.                  |                                                                                     |
| Supplier Warranty                  | 2 years (excluding deliberate or accidental damage). |                                                                                     |

## Urn: electric

| Catalogue Number | Item Name     | Available on Transversal Contract | Contract Number or Code |
|------------------|---------------|-----------------------------------|-------------------------|
| PHC-E-096        | Urn: electric | No                                |                         |

|                                    |                                                                                                                                                         |                                                                                     |
|------------------------------------|---------------------------------------------------------------------------------------------------------------------------------------------------------|-------------------------------------------------------------------------------------|
| Description                        | Urn, electric.                                                                                                                                          |  |
| Use                                | For boiling water in larger volumes than possible with a kettle.                                                                                        |                                                                                     |
| Clinical or User Specifications    | All stainless steel construction.<br>Thermostat to maintain water at desired temperature.<br>Metal spigot tap.<br>Has safety cut-out and anti boil-dry. |                                                                                     |
| Accessories or Related Consumables | None.                                                                                                                                                   |                                                                                     |
| Care                               | De-scale 6-monthly to maintain efficiency – more often in hard water areas.<br>Disconnect from mains electricity supply if empty.                       |                                                                                     |
| Supplier Warranty                  | 2 years (excluding deliberate or accidental damage).                                                                                                    |                                                                                     |

# Watercooler: free-standing

TECHNICAL SPECIFICATIONS  
page  
715

| Catalogue Number | Item Name                  | Available on Transversal Contract | Contract Number or Code |
|------------------|----------------------------|-----------------------------------|-------------------------|
| PHC-E-097        | Watercooler: free-standing | No                                |                         |

|                                    |                                                                                                                                                                                                                                         |                                                                                     |
|------------------------------------|-----------------------------------------------------------------------------------------------------------------------------------------------------------------------------------------------------------------------------------------|-------------------------------------------------------------------------------------|
| Description                        | Free-standing watercooler.                                                                                                                                                                                                              |  |
| Use                                | To provide cool drinking water in waiting areas.                                                                                                                                                                                        |                                                                                     |
| Clinical or User Specifications    | <p>Free-standing floor-mounted unit.</p> <p>The unit fits standard 15l bottles.</p> <p>Dispenses cold water via a push-to-fill tap.</p> <p>Drip tray to prevent spillage onto floor.</p> <p>Disposable paper cups – no polystyrene.</p> |                                                                                     |
| Accessories or Related Consumables | Disposable paper cups. PHC-C-164.                                                                                                                                                                                                       |                                                                                     |
| Care                               | Replace water container when empty.                                                                                                                                                                                                     |                                                                                     |
| Maintenance                        | Bottled watercoolers require sanitising every three months. Contact departmental technical personnel or supplier.                                                                                                                       |                                                                                     |
| Supplier Warranty                  | 2 years (excluding deliberate or accidental damage).                                                                                                                                                                                    |                                                                                     |

# Miscellaneous

## Bins: brazier

TECHNICAL SPECIFICATIONS  
page  
716

| Catalogue Number | Item Name               | Available on Transversal Contract | Contract Number or Code |
|------------------|-------------------------|-----------------------------------|-------------------------|
| PHC-E-159        | Brazier bin 105x135x75  |                                   |                         |
| PHC-E-160        | Brazier bin 105x190x75  |                                   |                         |
| PHC-E-161        | Brazier bin 140x210x130 |                                   |                         |
| PHC-E-162        | Brazier bin 140x280x130 |                                   |                         |

|                                    |                                                                                                                                                                      |                                                                                      |
|------------------------------------|----------------------------------------------------------------------------------------------------------------------------------------------------------------------|--------------------------------------------------------------------------------------|
| Description                        | Small open storage bins.                                                                                                                                             |  |
| Use                                | For the storage of packages of medicines in an orderly sorted manner.                                                                                                |                                                                                      |
| Clinical or User Specifications    | <p>Made of durable plastic.</p> <p>Range of colours and also clear plastic.</p> <p>Can be placed on shelves, or wall-mounted.</p> <p>Front edge can be labelled.</p> |                                                                                      |
| Accessories or Related Consumables |                                                                                                                                                                      |                                                                                      |
| Care                               | Standard cleaning method.                                                                                                                                            |                                                                                      |
| Supplier Warranty                  | N/A                                                                                                                                                                  |                                                                                      |

## Clock: wall

| Catalogue Number | Item Name   | Available on Transversal Contract | Contract Number or Code |
|------------------|-------------|-----------------------------------|-------------------------|
| PHC-E-099        | Clock: wall | No                                |                         |

|                                    |                                                                                                                                                                                                                                                                                                            |                                                                                     |
|------------------------------------|------------------------------------------------------------------------------------------------------------------------------------------------------------------------------------------------------------------------------------------------------------------------------------------------------------|-------------------------------------------------------------------------------------|
| Description                        | Wall clock, analogue.                                                                                                                                                                                                                                                                                      |  |
| Use                                | To display time in consulting rooms and waiting areas.                                                                                                                                                                                                                                                     |                                                                                     |
| Clinical or User Specifications    | <p>250-300mm. diameter, round. Battery-operated.</p> <p>Body of high-impact plastic, with clear dial cover.</p> <p>Dial plate white with bold black Arabic numerals.</p> <p>Hour and minute hands black, sweep second hand may be black or red.</p> <p>Built-in screw-head retainer for wall-mounting.</p> |                                                                                     |
| Accessories or Related Consumables | <p>Wall-plug and screw, for mounting on wall.</p> <p>Complete with battery.</p>                                                                                                                                                                                                                            |                                                                                     |
| Care                               | <p>Installation by supplier or departmental technical personnel.</p> <p>Replace battery with cell of same size, when required.</p>                                                                                                                                                                         |                                                                                     |
| Supplier Warranty                  | 1 year.                                                                                                                                                                                                                                                                                                    |                                                                                     |

# Complaints and suggestions box

| Catalogue Number | Item Name                      | Available on Transversal Contract | Contract Number or Code |
|------------------|--------------------------------|-----------------------------------|-------------------------|
| PHC-E-100        | Complaints and suggestions box | No                                |                         |

|                                    |                                                                                                                                                                                                                                                                                                                                                                                                                                                                            |                                                                                     |
|------------------------------------|----------------------------------------------------------------------------------------------------------------------------------------------------------------------------------------------------------------------------------------------------------------------------------------------------------------------------------------------------------------------------------------------------------------------------------------------------------------------------|-------------------------------------------------------------------------------------|
| Description                        | <p>Complaints and suggestions box.</p> <p>Frosted white, all-acrylic plastic construction box with lid.</p>                                                                                                                                                                                                                                                                                                                                                                |  |
| Use                                | Locked box to receive compliments, complaints or suggestions from patients.                                                                                                                                                                                                                                                                                                                                                                                                |                                                                                     |
| Clinical or User Specifications    | <p>White plastic backboard, with attached box with lockable lid, and open compartment for note paper. Lid has a slot, for insertion of written notes.</p> <p>Lid is kept locked.</p> <p>Unlocked weekly, to access contents for review.</p> <p>The backboard is printed with labels describing the use of the box, in three official languages.</p> <p>Text colour in Provincial colours.</p> <p>Permanently mounted in a prominent location in the main waiting area.</p> |                                                                                     |
| Accessories or Related Consumables | Brass combination-type lock.                                                                                                                                                                                                                                                                                                                                                                                                                                               |                                                                                     |
| Care                               | <p>To be mounted to the wall by supplier or departmental technical personnel.</p> <p>Standard cleaning and disinfection.</p> <p>Replenish notepaper and writing instruments as required.</p>                                                                                                                                                                                                                                                                               |                                                                                     |
| Supplier Warranty                  | 1 year.                                                                                                                                                                                                                                                                                                                                                                                                                                                                    |                                                                                     |



# Gun safe

| Catalogue Number | Item Name | Available on Transversal Contract | Contract Number or Code |
|------------------|-----------|-----------------------------------|-------------------------|
| PHC-E-101        | Gun safe  | No                                |                         |

|                                    |                                                                                                                                                                                                                                                                                                                                                                                                                                      |                                                                                     |
|------------------------------------|--------------------------------------------------------------------------------------------------------------------------------------------------------------------------------------------------------------------------------------------------------------------------------------------------------------------------------------------------------------------------------------------------------------------------------------|-------------------------------------------------------------------------------------|
| Description                        | Gun safe.                                                                                                                                                                                                                                                                                                                                                                                                                            |  |
| Use                                | For secure storage of handguns in the security office, prior to a patient's entry into the PHC facility.                                                                                                                                                                                                                                                                                                                             |                                                                                     |
| Clinical or User Specifications    | <p>Wall-mounted – must be mounted on a double (i.e. 18cm) solid masonry wall.</p> <p>Quality and thickness of materials are laid down in the Fire Arm Control Act 60 of 2000, and its regulations. The safe must be certified to comply.</p> <p>The safe has 2 locks, with different keys. After securing the firearm in the safe, one key is given to the firearm owner, the other is retained by the security officer on duty.</p> |                                                                                     |
| Accessories or Related Consumables | 2 sets of keys.                                                                                                                                                                                                                                                                                                                                                                                                                      |                                                                                     |
| Care                               | <p>Installation by departmental technical personnel, in accordance with the regulations.</p> <p>Spare keys must be securely stored, in accordance with key policy.</p>                                                                                                                                                                                                                                                               |                                                                                     |
| Supplier Warranty                  | 5 years on all components.                                                                                                                                                                                                                                                                                                                                                                                                           |                                                                                     |

## Notice board: wall-mounted

| Catalogue Number | Item Name             | Available on Transversal Contract | Contract Number or Code |
|------------------|-----------------------|-----------------------------------|-------------------------|
| PHC-E-102        | Notice board: A3 size | No                                |                         |
| PHC-E-103        | Notice board: A2 size |                                   |                         |
|                  |                       |                                   |                         |

|                                    |                                                                                                                                                                   |                                                                                     |
|------------------------------------|-------------------------------------------------------------------------------------------------------------------------------------------------------------------|-------------------------------------------------------------------------------------|
| Description                        | Notice board, wall-mounted.                                                                                                                                       |  |
| Use                                | For displaying ad-hoc information, for the benefit of the public or the staff.                                                                                    |                                                                                     |
| Clinical or User Specifications    | Aluminium frame. Fibreboard backing. Faced with polyester, non-shiny fabric. Dark colour preferred for contrast with notices.<br>Notices affixed with chart pins. |                                                                                     |
| Accessories or Related Consumables | Wall-mounting hardware.<br>Box of multi-coloured plastic push pins.                                                                                               |                                                                                     |
| Care                               | Installation by supplier or departmental technical personnel.                                                                                                     |                                                                                     |
| Supplier Warranty                  | 2 years on all components.                                                                                                                                        |                                                                                     |

# Pamphlet-holding boxes

| Catalogue Number | Item Name              | Available on Transversal Contract | Contract Number or Code |
|------------------|------------------------|-----------------------------------|-------------------------|
| PHC-E-104        | Pamphlet-holding boxes | No                                |                         |

|                                    |                                                                                                                                    |                                                                                     |
|------------------------------------|------------------------------------------------------------------------------------------------------------------------------------|-------------------------------------------------------------------------------------|
| Description                        | Pamphlet-holding boxes, wall-mounted.                                                                                              |  |
| Use                                | For displaying and dispensing patient information leaflets in reception and waiting areas.                                         |                                                                                     |
| Clinical or User Specifications    | White backing board.<br>Individual clear acrylic pockets, to hold A4 size pamphlets or smaller.<br>2 horizontal rows of 4 pockets. |                                                                                     |
| Accessories or Related Consumables | Wall-mounting hardware.                                                                                                            |                                                                                     |
| Care                               | Installation by supplier or departmental technical personnel.                                                                      |                                                                                     |
| Supplier Warranty                  | 2 years on all components.                                                                                                         |                                                                                     |

## Poster display boards

| Catalogue Number | Item Name                      | Available on Transversal Contract | Contract Number or Code |
|------------------|--------------------------------|-----------------------------------|-------------------------|
| PHC-E-105        | Poster display boards: A1 size | No                                |                         |
| PHC-E-106        | Poster display boards: A0 size | No                                |                         |

|                                    |                                                                                                                                                                           |                                                                                     |
|------------------------------------|---------------------------------------------------------------------------------------------------------------------------------------------------------------------------|-------------------------------------------------------------------------------------|
| Description                        | Poster display boards, wall-mounted.                                                                                                                                      |  |
| Use                                | For displaying patient information posters in reception and waiting areas, without damaging wall surfaces.                                                                |                                                                                     |
| Clinical or User Specifications    | Aluminium frame. Fibreboard backing. Faced with polyester, non-shiny fabric. Dark colour preferred for contrast with notices.<br>Posters affixed with clips or push pins. |                                                                                     |
| Accessories or Related Consumables | Wall-mounting hardware.<br>Box of multi-coloured plastic push pins.                                                                                                       |                                                                                     |
| Care                               | Installation by supplier or departmental technical personnel.                                                                                                             |                                                                                     |
| Supplier Warranty                  | 2 years on all components.                                                                                                                                                |                                                                                     |

# Whiteboard

| Catalogue Number | Item Name             | Available on Transversal Contract | Contract Number or Code |
|------------------|-----------------------|-----------------------------------|-------------------------|
| PHC-E-107        | Whiteboard, 1200x1000 | No                                |                         |
| PHC-E-108        | Whiteboard, 1800x1200 | No                                |                         |
| PHC-E-109        | Whiteboard 3000x1200  | No                                |                         |

|                                    |                                                                                                 |                                                                                     |
|------------------------------------|-------------------------------------------------------------------------------------------------|-------------------------------------------------------------------------------------|
| Description                        | Whiteboards, wall-mounted.                                                                      |  |
| Use                                | For temporary recording of proceedings, notes, meeting minutes, discussion points and diagrams. |                                                                                     |
| Clinical or User Specifications    | Aluminium frame.<br>Magnetic, white, epoxy-coated, sheet metal, writing surface.                |                                                                                     |
| Accessories or Related Consumables | Wall-mounting hardware.<br>Whiteboard felt eraser.                                              |                                                                                     |
| Care                               | Installation by supplier or departmental technical personnel.                                   |                                                                                     |
| Supplier Warranty                  | 2 years on all components.                                                                      |                                                                                     |



# B

# instruments

|                                       |            |                                                                 |            |
|---------------------------------------|------------|-----------------------------------------------------------------|------------|
| <b>RESUSCITATION</b>                  | <b>182</b> |                                                                 |            |
| Magill forceps: adult                 | 182        | Forceps: tooth extracting, Lower Anteriors Adult                | 223        |
| Magill forceps: child                 | 183        | Forceps: tooth extracting, Lower Bicuspid                       | 224        |
| Introducer (intubation stylet): adult | 184        | Forceps: tooth extracting, Lower Canines Adult                  | 225        |
| Introducer (intubation stylet): child | 185        | Forceps: tooth extracting, Lower Molars                         | 226        |
| Scissors: rescue                      | 186        | Forceps: tooth extracting, Lower roots and Crowded Incisors     | 227        |
| <b>SURGICAL</b>                       | <b>187</b> | Forceps: tooth extracting, Upper Anteriors and Canines          | 228        |
| Forceps: artery, curved               | 187        | Forceps: tooth extracting, Upper Bicuspid and Roots             | 229        |
| Forceps: artery, straight             | 188        | Forceps: tooth extracting, Upper Molars, Left                   | 230        |
| Forceps: non-toothed                  | 189        | Forceps: tooth extracting, Upper Molars, Right                  | 231        |
| Forceps: toothed                      | 190        | Forceps: tooth extracting, Upper Molars, Right                  | 232        |
| Forceps: mosquito, curved             | 191        | Forceps: tooth extracting, Upper roots                          | 233        |
| Forceps: mosquito, straight           | 192        | Forceps: tooth extracting, Upper roots                          | 234        |
| Needle holder                         | 193        | Forceps: tooth extracting, Upper roots                          | 235        |
| Scalpel handle: long, No. 3           | 194        | Forceps: tooth extracting, Upper roots, Small                   | 237        |
| Scissors: dissecting                  | 195        | Forceps: tooth extracting, Lower molars, child                  | 238        |
| Scissors: stitch                      | 196        | Forceps: tooth extracting, Lower teeth and roots, child         | 239        |
| Stitch tray: small                    | 197        | Forceps: tooth extracting, Upper Incisors and Canines, child    | 240        |
| Swab holder                           | 198        | Forceps: tooth extracting, Upper Molars, child                  | 241        |
| Syringe: dental                       | 199        | Forceps: tooth extracting, Upper teeth and roots, Molars, child | 242        |
| <b>OBSTETRIC</b>                      | <b>200</b> | Forceps: wire ligature                                          | 243        |
| Basin                                 | 200        | Gag (mouth prop)                                                | 244        |
| Bowl: large                           | 201        | Holder: Bib                                                     | 245        |
| Bowl: small                           | 202        | Holder: cotton pellet                                           | 246        |
| Kidney dish                           | 203        | Matrix retainer                                                 | 247        |
| Scissors: episiotomy                  | 204        | Needle holder                                                   | 249        |
| Scissors: umbilical                   | 205        | Periodontal Hoe                                                 | 250        |
| <b>ORAL HEALTH</b>                    | <b>206</b> | Rongeur: dental                                                 | 251        |
| Amalgam carrier: plastic              | 206        | Scaler, Dental                                                  | 252        |
| Amalgam plugger                       | 208        | Scissors: ligature                                              | 253        |
| Ball burnisher                        | 209        | Slab: mixing, glass                                             | 254        |
| Bur Block                             | 210        | Spatula: Cement                                                 | 255        |
| Bur brush                             | 211        | Syringe: dental, aspirating                                     | 256        |
| Carver: Amalgam                       | 212        | Trimmer: Gingival margin                                        | 257        |
| Carver: wax                           | 213        | Tweezers: Cotton and Dressing                                   | 258        |
| Dappen dish                           | 214        |                                                                 |            |
| Dental Explorer                       | 215        | <b>REHABILITATION</b>                                           | <b>259</b> |
| Dental Probe: periodontal             | 216        | <i>Physical therapy</i>                                         | <b>259</b> |
| Elevator: root, apical                | 217        | Scissors: standard                                              | 259        |
| Elevator: root, Cryers                | 218        | Scissors: splinting                                             | 260        |
| Elevator: root, Warwick-James         | 219        | <i>Audiology/speech therapy</i>                                 | <b>261</b> |
| Excavator: dental                     | 220        | Cerumen management kit                                          | 261        |
| Flat plastic                          | 221        | Curette: cerumen, plastic                                       | 262        |
| Forceps: tongue                       | 222        | Curette: cerumen, lighted                                       | 263        |
|                                       |            | Ear loop: Bileau, small                                         | 264        |
|                                       |            | Forceps: crocodile                                              | 265        |
|                                       |            | Syringe: impression                                             | 266        |

# Resuscitation

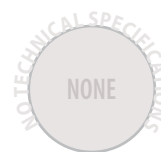

## Magill forceps: adult

| Catalogue Number | Item Name             | Available on Transversal Contract | Contract Number or Code |
|------------------|-----------------------|-----------------------------------|-------------------------|
| PHC-I-023        | Magill forceps: adult | RT 252                            | RT 252-01-122 ME        |

|                            |                                                                                                                                                                                                                    |
|----------------------------|--------------------------------------------------------------------------------------------------------------------------------------------------------------------------------------------------------------------|
| Functional Specifications  | <p>Forceps, endotracheal, Magill`s.</p> <p>Serrated, fenestrated jaws, screw joint.</p> <p>Stainless steel with matte finish.</p> <p>Length: 240mm.</p> <p>Autoclaveable, Specification number: 1691.</p>          |
| Use                        | Used to assist in the insertion of an endotracheal tube in an adult patient. Allows the body of the ET tube to be gripped and manipulated , without interfering with the line of sight while using a laryngoscope. |
| Applicable Standards       | ISO 13402:1995, ISO7151:1988, ISO 7153-1:2016, ISO900101 & ISO13485.                                                                                                                                               |
| Performance Specifications | 15-year service life.                                                                                                                                                                                              |
| Warranties                 | 2 years.                                                                                                                                                                                                           |
| Note to Procurement        |                                                                                                                                                                                                                    |



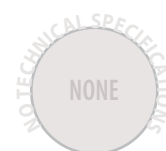

## Magill forceps: child

| Catalogue Number | Item Name             | Available on Transversal Contract | Contract Number or Code |
|------------------|-----------------------|-----------------------------------|-------------------------|
| PHC-I-024        | Magill forceps: child | RT 252                            | RT 252-01-122 ME        |

|                            |                                                                                                                                                                                                                               |
|----------------------------|-------------------------------------------------------------------------------------------------------------------------------------------------------------------------------------------------------------------------------|
| Functional Specifications  | <p>Forceps, endotracheal, Magill`s.</p> <p>Serrated, fenestrated jaws, screw joint.</p> <p>Stainless steel with matte finish.</p> <p>Length: 200mm.</p> <p>Autoclaveable, Specification number: 1699.</p>                     |
| Use                        | <p>Used to assist in the insertion of an endotracheal tube in a paediatric patient. Allows the body of the ET tube to be gripped and manipulated , without interfering with the line of sight while using a laryngoscope.</p> |
| Applicable Standards       | <p>ISO 13402:1995, ISO7151:1988, ISO 7153-1:2016, ISO900101 &amp; ISO13485.</p>                                                                                                                                               |
| Performance Specifications | <p>15-year service life.</p>                                                                                                                                                                                                  |
| Warranties                 | <p>2 years.</p>                                                                                                                                                                                                               |
| Note to Procurement        |                                                                                                                                                                                                                               |

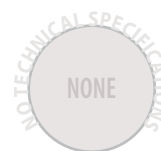

## Introducer (intubation stylet): adult

| Catalogue Number | Item Name                             | Available on Transversal Contract | Contract Number or Code |
|------------------|---------------------------------------|-----------------------------------|-------------------------|
| PHC-I-025        | Introducer (intubation stylet): adult | RT 13                             | RT 13-51-004            |

|                            |                                                                                                                                                                                                                                                                                                                                                             |
|----------------------------|-------------------------------------------------------------------------------------------------------------------------------------------------------------------------------------------------------------------------------------------------------------------------------------------------------------------------------------------------------------|
| Functional Specifications  | <p>Size: Adult -To fit Endotracheal tube size 6.5-11.0mm. Length:340mm-365mm.</p> <p>Manufactured from low friction atraumatic outer coating around a malleable aluminium core.</p> <p>Soft atraumatic tip, U-bend or other mechanism at proximal end to limit depth.</p> <p>Latex free. Clinically clean packaging. Individually packed in peel pouch.</p> |
| Use                        | <p>The stylet is used to modify the curve of the tip of an endotracheal tube, to facilitate insertion between the vocal cords.</p> <p>The stylet is placed inside the ET tube, with the tip protruding.</p> <p>The tube and enclosed stylet are then bent to the desired shape.</p> <p>The stylet is withdrawn after the ET tube has been inserted.</p>     |
| Applicable Standards       |                                                                                                                                                                                                                                                                                                                                                             |
| Performance Specifications |                                                                                                                                                                                                                                                                                                                                                             |
| Warranties                 | 2-year shelf life.                                                                                                                                                                                                                                                                                                                                          |
| Note to Procurement        |                                                                                                                                                                                                                                                                                                                                                             |

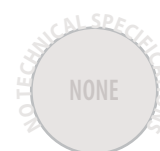

## Introducer (intubation stylet): child

| Catalogue Number | Item Name                             | Available on Transversal Contract | Contract Number or Code |
|------------------|---------------------------------------|-----------------------------------|-------------------------|
| PHC-I-026        | Introducer (intubation stylet): child | RT 13                             | RT 13-51-002            |

|                            |                                                                                                                                                                                                                                                                                                                                                             |
|----------------------------|-------------------------------------------------------------------------------------------------------------------------------------------------------------------------------------------------------------------------------------------------------------------------------------------------------------------------------------------------------------|
| Functional Specifications  | <p>Size: Paediatric -To fit Endotracheal tube size 4.0-4.5mm. Length: 275 mm.</p> <p>Manufactured from low friction atraumatic outer coating around a malleable aluminium core.</p> <p>Soft atraumatic tip, U-bend or other mechanism at proximal end to limit depth.</p> <p>Latex free. Clinically clean packaging. Individually packed in peel pouch.</p> |
| Use                        | <p>The stylet is used to modify the curve of the tip of an endotracheal tube, to facilitate insertion between the vocal cords.</p> <p>The stylet is placed inside the ET tube, with the tip protruding.</p> <p>The tube and enclosed stylet are then bent to the desired shape.</p> <p>The stylet is withdrawn after the ET tube has been inserted.</p>     |
| Applicable Standards       |                                                                                                                                                                                                                                                                                                                                                             |
| Performance Specifications |                                                                                                                                                                                                                                                                                                                                                             |
| Warranties                 | 2-year shelf life.                                                                                                                                                                                                                                                                                                                                          |
| Note to Procurement        |                                                                                                                                                                                                                                                                                                                                                             |

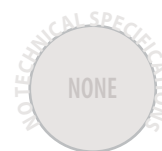

## Scissors: rescue

| Catalogue Number | Item Name        | Available on Transversal Contract | Contract Number or Code |
|------------------|------------------|-----------------------------------|-------------------------|
| PHC-I-020        | Scissors: rescue | RT 4                              | RT 4-05-051 ME          |

|                            |                                                                                                                                                                                                                                                                                                                                                                                                                         |
|----------------------------|-------------------------------------------------------------------------------------------------------------------------------------------------------------------------------------------------------------------------------------------------------------------------------------------------------------------------------------------------------------------------------------------------------------------------|
| Functional Specifications  | <p>Heavy duty rescue scissors suitable for Emergency Medical Care and Rescue of patients in the pre-hospital environment.</p> <p>The scissors must not be smaller or larger than 15cm long. The handle must be ergonomic to allow for a solid grip. The blades must be constructed from high quality 420 surgical grade stainless steel.</p> <p>Autoclaveable.</p> <p>Blades and handles to have non-stick surface.</p> |
| Use                        | <p>These scissors are used to rapidly remove clothing and strictures from patients, in emergency situations when there is no time for conventional undressing.</p>                                                                                                                                                                                                                                                      |
| Applicable Standards       | <p>ISO 13402:1995, ISO 7741:1986, ISO 7153-1:2016, ISO900101 &amp; ISO13485.</p>                                                                                                                                                                                                                                                                                                                                        |
| Performance Specifications | <p>The blades must be able to cut most materials including clothing and security belts.</p> <p>10-year service life.</p>                                                                                                                                                                                                                                                                                                |
| Warranties                 | <p>2 years.</p>                                                                                                                                                                                                                                                                                                                                                                                                         |
| Note to Procurement        |                                                                                                                                                                                                                                                                                                                                                                                                                         |

# Surgical

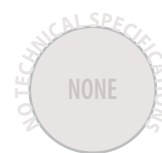

## Forceps: artery, curved

| Catalogue Number | Item Name               | Available on Transversal Contract | Contract Number or Code |
|------------------|-------------------------|-----------------------------------|-------------------------|
| PHC-I-004        | Forceps: artery, curved | RT 252                            | RT 252-01-085 ME        |

|                            |                                                                                                                                                                       |
|----------------------------|-----------------------------------------------------------------------------------------------------------------------------------------------------------------------|
| Functional Specifications  | Forceps, artery, Kocher.<br>Curved, box joint.<br>Stainless steel.<br>Length: 200mm.<br>Autoclaveable.<br>Specification number: 6330.                                 |
| Use                        | Medium-sized locking forceps, used to hold tissue in desired position, or to achieve haemostasis.<br>With curved jaws.<br>Ratcheting locks. Finger rings both shanks. |
| Applicable Standards       | ISO 13402:1995, ISO 7151:1988, ISO 7153-1:2016, ISO900101 & ISO13485.                                                                                                 |
| Performance Specifications | 15-year service life.                                                                                                                                                 |
| Warranties                 | 2 years.                                                                                                                                                              |
| Note to Procurement        |                                                                                                                                                                       |

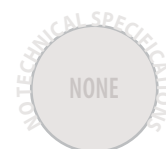

## Forceps: artery, straight

| Catalogue Number | Item Name                 | Available on Transversal Contract | Contract Number or Code |
|------------------|---------------------------|-----------------------------------|-------------------------|
| PHC-I-003        | Forceps: artery, straight | RT 252                            | RT 252-01-084 ME        |
|                  |                           |                                   |                         |

|                            |                                                                                                                                                                                        |
|----------------------------|----------------------------------------------------------------------------------------------------------------------------------------------------------------------------------------|
| Functional Specifications  | <p>Forceps, artery, Kocher.</p> <p>Straight, box joint.</p> <p>Stainless steel.</p> <p>Length: 200mm.</p> <p>Autoclaveable.</p> <p>Specification number: 4636.</p>                     |
| Use                        | <p>Medium-sized locking forceps, used to hold tissue in desired position, or to achieve haemostasis.</p> <p>With straight jaws.</p> <p>Ratcheting locks. Finger-rings both shanks.</p> |
| Applicable Standards       | ISO 13402:1995, ISO 7151:1988, ISO 7153-1:2016, ISO900101 & ISO13485.                                                                                                                  |
| Performance Specifications | 15-year service life.                                                                                                                                                                  |
| Warranties                 | 2 years.                                                                                                                                                                               |
| Note to Procurement        |                                                                                                                                                                                        |



## Forceps: non-toothed

| Catalogue Number | Item Name            | Available on Transversal Contract | Contract Number or Code |
|------------------|----------------------|-----------------------------------|-------------------------|
| PHC-I-002        | Forceps: non-toothed | RT 252                            | RT 252-01-113 ME        |
|                  |                      |                                   |                         |

|                            |                                                                                                                                                                                                                                                                                                                                 |
|----------------------------|---------------------------------------------------------------------------------------------------------------------------------------------------------------------------------------------------------------------------------------------------------------------------------------------------------------------------------|
| Functional Specifications  | <p>Forceps, dissecting/dressing.<br/>           Standard pattern.<br/>           Block joint.<br/>           Non-toothed serrated jaws.<br/>           Grip with transverse grooves.<br/>           Stainless steel.<br/>           Length: 180mm.<br/>           Autoclaveable.<br/>           Specification number: 1520.</p> |
| Use                        | <p>Medium-sized dissecting forceps for holding and bringing into approximation friable tissues.<br/>           Non-toothed.</p>                                                                                                                                                                                                 |
| Applicable Standards       | <p>ISO 13402:1995, ISO 7151:1988, ISO 7153-1:2016, ISO900101 &amp; ISO13485.</p>                                                                                                                                                                                                                                                |
| Performance Specifications | <p>15-year service life.</p>                                                                                                                                                                                                                                                                                                    |
| Warranties                 | <p>2 years.</p>                                                                                                                                                                                                                                                                                                                 |
| Note to Procurement        |                                                                                                                                                                                                                                                                                                                                 |

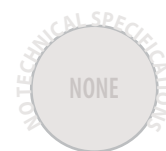

## Forceps: toothed

| Catalogue Number | Item Name        | Available on Transversal Contract | Contract Number or Code |
|------------------|------------------|-----------------------------------|-------------------------|
| PHC-I-001        | Forceps: toothed | RT 252                            | RT 252-01-109 ME        |

|                            |                                                                                                                                                                                                                                                              |
|----------------------------|--------------------------------------------------------------------------------------------------------------------------------------------------------------------------------------------------------------------------------------------------------------|
| Functional Specifications  | <p>Dissecting forceps, toothed. Bonney pattern.</p> <p>Block joint.</p> <p>Serrated jaws, 1 x 2 teeth.</p> <p>Roughened handle.</p> <p>Stainless steel with matte finish.</p> <p>Length: 180mm.</p> <p>Autoclaveable.</p> <p>Specification number: 1511.</p> |
| Use                        | <p>Medium-sized dissecting forceps for holding and bringing into approximation friable tissues.</p> <p>Interlocking teeth.</p>                                                                                                                               |
| Applicable Standards       | ISO 13402:1995, ISO 7151:1988, ISO 7153-1:2016, ISO900101 & ISO13485.                                                                                                                                                                                        |
| Performance Specifications | 15-year service life.                                                                                                                                                                                                                                        |
| Warranties                 | 2 years.                                                                                                                                                                                                                                                     |
| Note to Procurement        |                                                                                                                                                                                                                                                              |



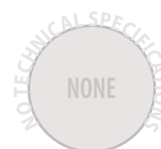

## Forceps: mosquito, curved

| Catalogue Number | Item Name                 | Available on Transversal Contract | Contract Number or Code |
|------------------|---------------------------|-----------------------------------|-------------------------|
| PHC-I-006        | Forceps: mosquito, curved | RT 252                            | RT 252-01-312 ME        |

|                            |                                                                                                                                                                |
|----------------------------|----------------------------------------------------------------------------------------------------------------------------------------------------------------|
| Functional Specifications  | <p>Forceps, artery, Halsted-mosquito.</p> <p>Curved, box joint.</p> <p>Fine tip.</p> <p>Stainless steel.</p> <p>Length: 125mm.</p> <p>Autoclaveable.</p>       |
| Use                        | <p>Small locking forceps, to secure haemostasis in small-vessel bleeds.</p> <p>With curved jaws.</p> <p>Ratcheting locks.</p> <p>Finger-rings both shanks.</p> |
| Applicable Standards       | ISO 13402:1995, ISO 7151:1988, ISO 7153-1:2016, ISO900101 & ISO13485.                                                                                          |
| Performance Specifications | 15-year service life.                                                                                                                                          |
| Warranties                 | 2 years.                                                                                                                                                       |
| Note to Procurement        |                                                                                                                                                                |



## Forceps: mosquito, straight

| Catalogue Number | Item Name                   | Available on Transversal Contract | Contract Number or Code |
|------------------|-----------------------------|-----------------------------------|-------------------------|
| PHC-I-005        | Forceps: mosquito, straight | RT 252                            | RT 252-01-079 ME        |

|                            |                                                                                                                                                                              |
|----------------------------|------------------------------------------------------------------------------------------------------------------------------------------------------------------------------|
| Functional Specifications  | <p>Forceps, artery, Halsted-mosquito.</p> <p>Straight, box joint.</p> <p>Stainless steel.</p> <p>Length: 125mm.</p> <p>Autoclaveable.</p> <p>Specification number: 1489.</p> |
| Use                        | <p>Small locking forceps, to secure haemostasis in small-vessel bleeds.</p> <p>With straight jaws.</p> <p>Ratcheting lock.</p> <p>Finger-rings both shanks.</p>              |
| Applicable Standards       | ISO 13402:1995, ISO 7151:1988, ISO 7153-1:2016, ISO900101 & ISO13485.                                                                                                        |
| Performance Specifications | 15-year service life.                                                                                                                                                        |
| Warranties                 | 2 years.                                                                                                                                                                     |
| Note to Procurement        |                                                                                                                                                                              |

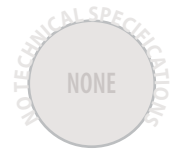

# Needle holder

| Catalogue Number | Item Name     | Available on Transversal Contract | Contract Number or Code |
|------------------|---------------|-----------------------------------|-------------------------|
| PHC-I-008        | Needle holder | RT 252                            | RT 252-01-173 ME        |

|                            |                                                                                                                                                                  |
|----------------------------|------------------------------------------------------------------------------------------------------------------------------------------------------------------|
| Functional Specifications  | Needle holder, Mayo-Hegar.<br>Box joint.<br>Tungsten Carbide Jaw Inserts.<br>Stainless steel.<br>Length: 150mm.<br>Autoclaveable.<br>Specification number: 1568. |
| Use                        | Medium-sized universal-pattern needle holder. Ratcheting lock.<br>Tungsten carbide inserts in the jaws, for long life.<br>Finger-ring on both shanks.            |
| Applicable Standards       | ISO 13402:1995, ISO 7151:1988, ISO 7153-1:2016, ISO900101 & ISO13485.                                                                                            |
| Performance Specifications | 15-year service life.                                                                                                                                            |
| Warranties                 | 2 years.                                                                                                                                                         |
| Note to Procurement        |                                                                                                                                                                  |

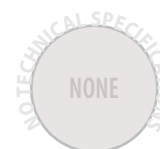

## Scalpel handle: long, No. 3

| Catalogue Number | Item Name                  | Available on Transversal Contract | Contract Number or Code |
|------------------|----------------------------|-----------------------------------|-------------------------|
| PHC-I-007        | Scalpel handle: long, No.3 | RT 252                            | RT 252-01-015 ME        |

|                            |                                                                                                                                                                                                                                                                  |
|----------------------------|------------------------------------------------------------------------------------------------------------------------------------------------------------------------------------------------------------------------------------------------------------------|
| Functional Specifications  | <p>Scalpel handle.<br/>Type: Long, No: 3.<br/>Scalpel Handle – must be compatible with blades number: RT 252-01-005ME, RT 252-01-006 ME, RT 252-01-007 ME AND RT 252-01-008 ME.<br/>Autoclaveable.<br/>Specification number: 1605.</p>                           |
| Use                        | Used in conjunction with a matching blade, for incisions, excisions, and drainage.                                                                                                                                                                               |
| Applicable Standards       | ISO 13402:1995, ISO 7740:1985, ISO 7153-1:2016, ISO900101 & ISO13485.                                                                                                                                                                                            |
| Performance Specifications | 15-year service life.                                                                                                                                                                                                                                            |
| Warranties                 | 2 years.                                                                                                                                                                                                                                                         |
| Note to Procurement        | ITEMS NUMBERS: (RT 252-01-005 ME, RT 252-01-006 ME, RT 252-01-007 ME, RT 252-01-008 ME, RT 252-01-014 ME, RT 252-01-015 ME, RT 252-01-018 ME AND RT 252-01-019 ME) will be evaluated as series in terms of 16.4 paragraph in the Special Conditions of Contract. |

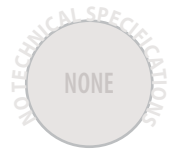

## Scissors: dissecting

| Catalogue Number | Item Name            | Available on Transversal Contract | Contract Number or Code |
|------------------|----------------------|-----------------------------------|-------------------------|
| PHC-I-027        | Scissors: dissecting | RT252-2015                        | RT252-01-227ME          |

|                            |                                                                                                                                                                                                                                                                         |
|----------------------------|-------------------------------------------------------------------------------------------------------------------------------------------------------------------------------------------------------------------------------------------------------------------------|
| Functional Specifications  | <p>Dissecting scissors. McIndoe/Metzenbaum pattern. Stainless steel.</p> <p>Screw joint, double straight shanks. Finger-ring shanks.</p> <p>Both blades blunt.</p> <p>Curved on flat.</p> <p>Length 180mm.</p> <p>Autoclaveable.</p> <p>Specification number: 6162.</p> |
| Use                        | For intra-oral dissection.                                                                                                                                                                                                                                              |
| Applicable Standards       | ISO 13402:1995, ISO 7741:1986, ISO 7153-1:2016, ISO900101 & ISO13485.                                                                                                                                                                                                   |
| Performance Specifications | 15- year service life.                                                                                                                                                                                                                                                  |
| Warranties                 | 2 years (excluding deliberate or accidental damage).                                                                                                                                                                                                                    |
| Note to Procurement        |                                                                                                                                                                                                                                                                         |



## Scissors: stitch

| Catalogue Number | Item Name        | Available on Transversal Contract | Contract Number or Code |
|------------------|------------------|-----------------------------------|-------------------------|
| PHC-I-009        | Scissors: stitch | RT 252                            | RT 252-01-240 ME        |

|                            |                                                                                                                                                                                                                                  |
|----------------------------|----------------------------------------------------------------------------------------------------------------------------------------------------------------------------------------------------------------------------------|
| Functional Specifications  | <p>Scissors, suture, Heath.</p> <p>Screw joint, double straight shanks.</p> <p>Sharp/sharp.</p> <p>Length: 150mm.</p> <p>Autoclaveable.</p> <p>Stainless steel, matte finish.</p> <p>Specification number: 6162.</p>             |
| Use                        | <p>Medium-sized handles, but small sharp blades, for insertion into suture before cutting.</p> <p>The selected model has straight shanks, as opposed to the more common double-curvature pattern.</p> <p>Finger-ring shanks.</p> |
| Applicable Standards       | ISO 13402:1995, ISO 7741:1986, ISO 7153-1:2016, ISO900101 & ISO13485.                                                                                                                                                            |
| Performance Specifications | 10-year service life.                                                                                                                                                                                                            |
| Warranties                 | 2 years.                                                                                                                                                                                                                         |
| Note to Procurement        |                                                                                                                                                                                                                                  |



## Stitch tray: small

| Catalogue Number | Item Name          | Available on Transversal Contract | Contract Number or Code |
|------------------|--------------------|-----------------------------------|-------------------------|
| PHC-I-010        | Stitch tray: small | No                                |                         |

|                            |                                                                                                                                                |
|----------------------------|------------------------------------------------------------------------------------------------------------------------------------------------|
| Functional Specifications  | Perforated tray with lid, minimum dimensions 26X12X6cm.<br>Stainless steel.<br>Autoclaveable.                                                  |
| Use                        | Wire mesh- or perforated-sheet stainless steel tray with lid.<br>Used to assemble the various instruments into a pack, prior to sterilisation. |
| Applicable Standards       | ISO 13402:1995, ISO 7153-1:2016, ISO900101 & ISO13485.                                                                                         |
| Performance Specifications | 15-year service life.                                                                                                                          |
| Warranties                 | 2 years.                                                                                                                                       |
| Note to Procurement        |                                                                                                                                                |



## Swab holder

| Catalogue Number | Item Name   | Available on Transversal Contract | Contract Number or Code |
|------------------|-------------|-----------------------------------|-------------------------|
| PHC-I-011        | Swab holder | RT 252                            | RT 252-01-139 ME        |

|                            |                                                                                                                                                                                                                   |
|----------------------------|-------------------------------------------------------------------------------------------------------------------------------------------------------------------------------------------------------------------|
| Functional Specifications  | <p>Forceps, sponge/gauze pad holding.<br/> Rampley.<br/> Straight, box joint.<br/> Serrated jaws with ratchet.<br/> Stainless steel.<br/> Length: 180mm.<br/> Autoclaveable.<br/> Specification number: 1542.</p> |
| Use                        | <p>Forceps with two looped jaws, designed to hold surgical sponges securely.<br/> Ratcheting lock.<br/> Finger-rings both shanks.</p>                                                                             |
| Applicable Standards       | ISO 13402:1995, ISO7151:1988, ISO 7153-1:2016, ISO900101 & ISO13485.                                                                                                                                              |
| Performance Specifications | 15-year service life.                                                                                                                                                                                             |
| Warranties                 | 2 years.                                                                                                                                                                                                          |
| Note to Procurement        |                                                                                                                                                                                                                   |





## Syringe: dental

| Catalogue Number | Item Name       | Available on Transversal Contract | Contract Number or Code |
|------------------|-----------------|-----------------------------------|-------------------------|
| PHC-I-031        | Syringe: dental | RT287-2015                        | RT287-04-066            |

|                            |                                                                                                                                                                                                         |
|----------------------------|---------------------------------------------------------------------------------------------------------------------------------------------------------------------------------------------------------|
| Functional Specifications  | Syringe, cartridge: Aspirating, 1.8 ml Carpule, SL 33 needle attachment with short cartridge pick, No SL 18 C, double claw plunge.<br>For infiltration of local anaesthetic in surgery and oral health. |
| Use                        |                                                                                                                                                                                                         |
| Applicable Standards       | ISO 9997:1999 (SANS standard is for a disposable type).                                                                                                                                                 |
| Performance Specifications | Autoclaveable.<br>Expected service life 15 years.                                                                                                                                                       |
| Warranties                 | 2 years.                                                                                                                                                                                                |
| Note to Procurement        | Aspirating model has been selected instead of T-bar type, as this is required for Oral Health.                                                                                                          |

# Obstetric

## Basin

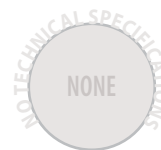

| Catalogue Number | Item Name | Available on Transversal Contract | Contract Number or Code |
|------------------|-----------|-----------------------------------|-------------------------|
| PHC-I-021        | Basin     |                                   |                         |
|                  |           |                                   |                         |

|                            |                                                                                                                                                                          |
|----------------------------|--------------------------------------------------------------------------------------------------------------------------------------------------------------------------|
| Functional Specifications  | <p>Basin.</p> <p>Dimensions approximately 450daimx100mm high.</p> <p>Stainless steel.</p> <p>Autoclaveable.</p>                                                          |
| Use                        | <p>Used to hold obstetric instruments during sterilisation.</p> <p>Once the pack is opened, filled with warm disinfectant solution for instrument and glove rinsing.</p> |
| Applicable Standards       | ISO 13402:1995, ISO 7153-1:2016, ISO900101 & ISO13485.                                                                                                                   |
| Performance Specifications | 15-year service life.                                                                                                                                                    |
| Warranties                 | 2 years.                                                                                                                                                                 |
| Note to Procurement        |                                                                                                                                                                          |



## Bowl: large

| Catalogue Number | Item Name   | Available on Transversal Contract | Contract Number or Code |
|------------------|-------------|-----------------------------------|-------------------------|
| PHC-I-022        | Bowl: large | No                                |                         |

|                            |                                                                                                                        |
|----------------------------|------------------------------------------------------------------------------------------------------------------------|
| Functional Specifications  | <p>Bowl, large.</p> <p>Dimensions approximately 350daim x 60mm high.</p> <p>Stainless steel.</p> <p>Autoclaveable.</p> |
| Use                        | Large Stainless steel bowl, used to hold instruments and/or disinfectant lotions during a procedure.                   |
| Applicable Standards       | ISO 13402:1995, ISO 7153-1:2016, ISO900101 & ISO13485.                                                                 |
| Performance Specifications | 15-year service life.                                                                                                  |
| Warranties                 | 2 years.                                                                                                               |
| Note to Procurement        |                                                                                                                        |



## Bowl: small

| Catalogue Number | Item Name   | Available on Transversal Contract | Contract Number or Code |
|------------------|-------------|-----------------------------------|-------------------------|
| PHC-I-012        | Bowl: small | No                                |                         |

|                            |                                                                                                                            |
|----------------------------|----------------------------------------------------------------------------------------------------------------------------|
| Functional Specifications  | Gallipot/lotion bowl.<br>Diameter approximately 200mm.<br>Stainless steel.<br>Autoclaveable.                               |
| Use                        | Uses include holding Skin disinfectant during preparation for a procedure, and as holder for sutures during the procedure. |
| Applicable standards       | ISO 13402:1995, ISO 7153-1:2016, ISO900101 & ISO13485.                                                                     |
| Performance Specifications | 15-year service life.                                                                                                      |
| Warranties                 | 2 years.                                                                                                                   |
| Note to procurement        |                                                                                                                            |



# Kidney dish

| Catalogue Number | Item Name          | Available on Transversal Contract | Contract Number or Code |
|------------------|--------------------|-----------------------------------|-------------------------|
| PHC-I-013        | Kidney dish: large | No                                |                         |
| PHC-I-032        | Kidney dish: small | No                                |                         |

|                            |                                                                                                                                                                        |
|----------------------------|------------------------------------------------------------------------------------------------------------------------------------------------------------------------|
| Functional Specifications  | <p>Kidney dish.</p> <p>Dimensions approximately:</p> <p>Large: approx 250x130x40mm</p> <p>Small: approx 150x90x32mm.</p> <p>Stainless steel.</p> <p>Autoclaveable.</p> |
| Use                        | For general use as a receptacle for fluids, tissues and instruments.                                                                                                   |
| Applicable standards       | ISO 13402:1995, ISO 7153-1:2016, ISO900101 & ISO13485.                                                                                                                 |
| Performance Specifications | 15-year service life.                                                                                                                                                  |
| Warranties                 | 2 years.                                                                                                                                                               |
| Note to procurement        |                                                                                                                                                                        |



## Scissors: episiotomy

| Catalogue Number | Item Name            | Available on Transversal Contract | Contract Number or Code |
|------------------|----------------------|-----------------------------------|-------------------------|
| PHC-I-019        | Scissors: episiotomy | RT 252                            | RT 252-01-234 ME        |

|                            |                                                                                                                                                                                                                                    |
|----------------------------|------------------------------------------------------------------------------------------------------------------------------------------------------------------------------------------------------------------------------------|
| Functional Specifications  | <p>Scissors, episiotomy, Braun-Stadler.</p> <p>Stainless steel.</p> <p>Angled to side.</p> <p>Blunt/blunt blades.</p> <p>Length: 150mm.</p> <p>Autoclaveable.</p> <p>Specification number: 5411.</p>                               |
| Use                        | <p>Medium-size scissors.</p> <p>Strong blades, both blunt to avoid inadvertent damage to birth canal structures during an episiotomy.</p> <p>Blades are angles to one side, to permit insertion into maximally-dilated cervix.</p> |
| Applicable Standards       | ISO 13402:1995, ISO7741:1986, ISO 7153-1:2016, ISO900101 & ISO13485.                                                                                                                                                               |
| Performance Specifications | 10-year service life.                                                                                                                                                                                                              |
| Warranties                 | 2 years.                                                                                                                                                                                                                           |
| Note to Procurement        |                                                                                                                                                                                                                                    |



## Scissors: umbilical

| Catalogue Number | Item Name           | Available on Transversal Contract | Contract Number or Code |
|------------------|---------------------|-----------------------------------|-------------------------|
| PHC-I-018        | Scissors: umbilical | RT 252                            | RT 252-01-242 ME        |
|                  |                     |                                   |                         |

|                            |                                                                                                                                                                                       |
|----------------------------|---------------------------------------------------------------------------------------------------------------------------------------------------------------------------------------|
| Functional Specifications  | <p>Scissors, umbilical.</p> <p>Screw joint.</p> <p>Stainless steel.</p> <p>Autoclavable.</p> <p>Blunt/blunt blades.</p> <p>Length: 120mm.</p> <p>Specification number: 5412.</p>      |
| Use                        | <p>Scissors with wide, flat, curved blades.</p> <p>Used to cut the umbilical cord.</p> <p>The inner curve of the blades holds the cord, so that it does not slip while being cut.</p> |
| Applicable standards       | ISO 13402:1995, ISO7741:1986, ISO 7153-1:2016, ISO900101 & ISO13485.                                                                                                                  |
| Performance Specifications | 10-year service life.                                                                                                                                                                 |
| Warranties                 | 2 years.                                                                                                                                                                              |
| Note to Procurement        |                                                                                                                                                                                       |

# Oral health

**Note:** to avoid duplication, the following items are listed elsewhere in this Instruments section:

- Cotton wool holder (see Bowl: Small)
- Dental syringe and needles
- Kidney dish

## Amalgam carrier: plastic

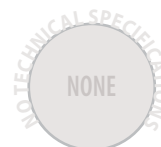

| Catalogue Number | Item Name                             | Available on Transversal Contract | Contract Number or Code |
|------------------|---------------------------------------|-----------------------------------|-------------------------|
| PHC-I-033        | Amalgam carrier: plastic, straight    | RT287-2015                        | RT287-04-003            |
| PHC-I-034        | Amalgam carrier: plastic, right-angle | RT287-2015                        | RT287-04-002            |

|                            |                                                   |                                                                                       |
|----------------------------|---------------------------------------------------|---------------------------------------------------------------------------------------|
| Functional Specifications  |                                                   |  |
| Applicable Standards       |                                                   |                                                                                       |
| Performance Specifications | Autoclaveable.<br>Expected service life 10 years. |                                                                                       |
| Accessories                | None.                                             |                                                                                       |



|                           |                                                     |
|---------------------------|-----------------------------------------------------|
| Warranties                | 1 year (excluding deliberate or accidental damage). |
| Instructions to Suppliers |                                                     |
| Note to Procurement       |                                                     |



## Amalgam plugger

| Catalogue Number | Item Name               | Available on Transversal Contract | Contract Number or Code |
|------------------|-------------------------|-----------------------------------|-------------------------|
| PHC-I-035        | Amalgam plugger: No.151 | RT287-2015                        | RT287-04-012            |
| PHC-I-036        | Amalgam plugger: No.153 | RT287-2015                        | RT287-04-013            |

|                            |                                                                                                                                                                  |
|----------------------------|------------------------------------------------------------------------------------------------------------------------------------------------------------------|
| Functional Specifications  | RT287-04-012: Plugger, amalgam, dental: Plastic Inst. No 151, serrated handle.<br>RT287-04-013: Plugger, amalgam, dental: Plastic Inst. No 153, serrated handle. |
| Applicable Standards       |                                                                                                                                                                  |
| Performance Specifications | Autoclaveable.<br>Expected service life 10 years.                                                                                                                |
| Accessories                | None.                                                                                                                                                            |
| Warranties                 | 1 year (excluding deliberate or accidental damage).                                                                                                              |
| Instructions to Suppliers  |                                                                                                                                                                  |
| Note to Procurement        |                                                                                                                                                                  |



# Ball burnisher

| Catalogue Number | Item Name               | Available on Transversal Contract | Contract Number or Code |
|------------------|-------------------------|-----------------------------------|-------------------------|
| PHC-I-037        | Ball burnisher No. 153  | RT287-2015                        | RT287-04-019            |
| PHC-I-038        | Ball burnisher No. 1/23 | RT287-2015                        | RT287-04-020            |

|                            |                                                                                                                                                                                                                                                                    |  |
|----------------------------|--------------------------------------------------------------------------------------------------------------------------------------------------------------------------------------------------------------------------------------------------------------------|--|
| Functional Specifications  | <p>Plugger, plastic filling, dental: Composite.<br/>Instrument, Zirconium Nitride Coated, No. Plastic 153 SM, silicone handle.</p> <p>Plugger, plastic filling, dental: Composite instrument, Zirconium Nitride Coated, No. Hollenbach 1/2 3, silicone handle.</p> |  |
| Applicable Standards       |                                                                                                                                                                                                                                                                    |  |
| Performance Specifications | <p>Autoclaveable.</p> <p>Expected service life 10 years.</p>                                                                                                                                                                                                       |  |
| Accessories                | None.                                                                                                                                                                                                                                                              |  |
| Warranties                 | 1 year (excluding deliberate or accidental damage).                                                                                                                                                                                                                |  |
| Instructions to Suppliers  |                                                                                                                                                                                                                                                                    |  |
| Note to Procurement        |                                                                                                                                                                                                                                                                    |  |

## Bur Block



| Catalogue Number | Item Name | Available on Transversal Contract | Contract Number or Code |
|------------------|-----------|-----------------------------------|-------------------------|
| PHC-I-039        | Bur Block | No                                |                         |

|                            |                                                                                           |
|----------------------------|-------------------------------------------------------------------------------------------|
| Functional Specifications  | Plastic or resin block, with holes to hold approximately 12 Small, Medium and large burs. |
| Applicable Standards       |                                                                                           |
| Performance Specifications | Autoclaveable.<br>Expected service life 10 years.                                         |
| Accessories                | None.                                                                                     |
| Warranties                 | 1 year (excluding deliberate or accidental damage).                                       |
| Instructions to Suppliers  |                                                                                           |
| Note to Procurement        |                                                                                           |



# Bur brush

| Catalogue Number | Item Name | Available on Transversal Contract | Contract Number or Code |
|------------------|-----------|-----------------------------------|-------------------------|
| PHC-I-111        | Bur brush | RT287-2015                        | RT287-07-001            |

|                            |                                                                                               |
|----------------------------|-----------------------------------------------------------------------------------------------|
| Functional Specifications  | Brush, Scratch, Dental: Bur Cleaning, Brass Wire Brush Pencil Type No. 3, Telescopic Handle . |
| Applicable Standards       |                                                                                               |
| Performance Specifications | Autoclaveable.<br>Expected service life 10 years.                                             |
| Accessories                | None.                                                                                         |
| Warranties                 | 1 year (excluding deliberate or accidental damage).                                           |
| Instructions to Suppliers  |                                                                                               |
| Note to Procurement        |                                                                                               |

# Carver: Amalgam



| Catalogue Number | Item Name      | Available on Transversal Contract | Contract Number or Code |
|------------------|----------------|-----------------------------------|-------------------------|
| PHC-I-040        | Amalgam carver | RT287-2015                        | RT287-04-008            |

|                            |                                                                  |                                                                                    |
|----------------------------|------------------------------------------------------------------|------------------------------------------------------------------------------------|
| Functional Specifications  | Carver, dental: Amalgam, Cleoid-Discoid, 92/89, serrated handle. |  |
| Applicable Standards       |                                                                  |                                                                                    |
| Performance Specifications | Autoclaveable.<br>Expected service life 10 years.                |                                                                                    |
| Accessories                | None.                                                            |                                                                                    |
| Warranties                 | 1 year (excluding deliberate or accidental damage).              |                                                                                    |
| Instructions to Suppliers  |                                                                  |                                                                                    |
| Note to Procurement        |                                                                  |                                                                                    |



## Carver: wax

| Catalogue Number | Item Name   | Available on Transversal Contract | Contract Number or Code |
|------------------|-------------|-----------------------------------|-------------------------|
| PHC-I-041        | Carver: wax | RT287-2015                        | RT287-09-030            |

|                            |                                                     |                                                                                    |
|----------------------------|-----------------------------------------------------|------------------------------------------------------------------------------------|
| Functional Specifications  | Carver, Dental: Wax, Le Cron.                       |  |
| Applicable Standards       |                                                     |                                                                                    |
| Performance Specifications | Autoclaveable.<br>Expected service life 10 years.   |                                                                                    |
| Accessories                | None.                                               |                                                                                    |
| Warranties                 | 1 year (excluding deliberate or accidental damage). |                                                                                    |
| Instructions to Suppliers  |                                                     |                                                                                    |
| Note to Procurement        |                                                     |                                                                                    |

# Dappen dish



| Catalogue Number | Item Name   | Available on Transversal Contract | Contract Number or Code |
|------------------|-------------|-----------------------------------|-------------------------|
| PHC-I-042        | Dappen dish | RT287-2015                        | RT287-07-009            |

|                            |                                                                        |
|----------------------------|------------------------------------------------------------------------|
| Functional Specifications  | Dish, Medicament, Dental: Dappen Type, 30 x 25mm, Clear, Autoclavable. |
| Applicable Standards       |                                                                        |
| Performance Specifications | Autoclaveable.                                                         |
| Accessories                | None.                                                                  |
| Warranties                 | 1 year (excluding deliberate or accidental damage).                    |
| Instructions to Suppliers  |                                                                        |
| Note to Procurement        |                                                                        |



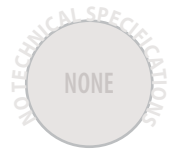

# Dental Explorer

| Catalogue Number | Item Name               | Available on Transversal Contract | Contract Number or Code |
|------------------|-------------------------|-----------------------------------|-------------------------|
| PHC-I-043        | Dental Explorer: FT2/54 | RT287-2015                        | RT287-01-001            |
| PHC-I-044        | Dental Explorer: FT 5/8 | RT287-2015                        | RT287-01-002            |

|                            |                                                                                                                                                                                                         |                                                                                    |
|----------------------------|---------------------------------------------------------------------------------------------------------------------------------------------------------------------------------------------------------|------------------------------------------------------------------------------------|
| Functional Specifications  | <p>RT287-01-001: Explorer, dental: No. FT2/54, Blacks Formula: 7-4-23 / 10-6-26, Serrated handle.</p> <p>RT287-01-002: Explorer, dental: No. FT 5/8, Blacks Formula: 14-4 / 11-24, Serrated handle.</p> |  |
| Applicable Standards       |                                                                                                                                                                                                         |                                                                                    |
| Performance Specifications | <p>Autoclaveable.</p> <p>Expected service life 15 years.</p>                                                                                                                                            |                                                                                    |
| Accessories                | None.                                                                                                                                                                                                   |                                                                                    |
| Warranties                 | 1 year (excluding deliberate or accidental damage).                                                                                                                                                     |                                                                                    |
| Instructions to Suppliers  |                                                                                                                                                                                                         |                                                                                    |
| Note to Procurement        |                                                                                                                                                                                                         |                                                                                    |

# Dental Probe: periodontal



| Catalogue Number | Item Name                 | Available on Transversal Contract | Contract Number or Code |
|------------------|---------------------------|-----------------------------------|-------------------------|
| PHC-I-045        | Dental Probe: periodontal | RT287-2015                        | RT287-04-034            |

|                            |                                                                                                |                                                                                    |
|----------------------------|------------------------------------------------------------------------------------------------|------------------------------------------------------------------------------------|
| Functional Specifications  | Probe, periodontal: Expro, Color-coded, 1-2-3-5-7-8-9-10mm interval markings, Serrated handle. |  |
| Applicable Standards       |                                                                                                |                                                                                    |
| Performance Specifications | Autoclaveable.<br>Expected service life 15 years.                                              |                                                                                    |
| Accessories                | None.                                                                                          |                                                                                    |
| Warranties                 | 1 year (excluding deliberate or accidental damage).                                            |                                                                                    |
| Instructions to Suppliers  |                                                                                                |                                                                                    |
| Note to Procurement        |                                                                                                |                                                                                    |



## Elevator: root, apical

| Catalogue Number | Item Name                        | Available on Transversal Contract | Contract Number or Code |
|------------------|----------------------------------|-----------------------------------|-------------------------|
| PHC-I-046        | Elevator: root, apical, straight | RT287-2015                        | RT287-06-008            |
| PHC-I-047        | Elevator: root, apical, right    | RT287-2015                        | RT287-06-007            |
| PHC-I-048        | Elevator: root, apical, left     | RT287-2015                        | RT287-06-006            |
|                  |                                  |                                   |                         |

|                            |                                                                                                                                                                     |
|----------------------------|---------------------------------------------------------------------------------------------------------------------------------------------------------------------|
| Functional Specifications  | RT287-06-006: Elevator, Root: Apical Left, No. 27.<br>RT287-06-007: Elevator, Root: Apical Right, No. 28.<br>RT287-06-008: Elevator, Root: Apical Straight, No. 26. |
| Applicable Standards       |                                                                                                                                                                     |
| Performance Specifications | Autoclaveable.<br>Expected service life 15 years.                                                                                                                   |
| Accessories                | None.                                                                                                                                                               |
| Warranties                 | 1 year (excluding deliberate or accidental damage).                                                                                                                 |
| Instructions to Suppliers  |                                                                                                                                                                     |
| Note to Procurement        |                                                                                                                                                                     |

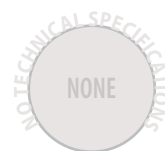

## Elevator: root, Cryers

| Catalogue Number | Item Name               | Available on Transversal Contract | Contract Number or Code |
|------------------|-------------------------|-----------------------------------|-------------------------|
| PHC-I-049        | Elevator: Cryers, right | RT287-2015                        | RT287-06-010            |
| PHC-I-050        | Elevator: Cryers, left  | RT287-2015                        | RT287-06-009            |

|                            |                                                             |                                                                                    |
|----------------------------|-------------------------------------------------------------|------------------------------------------------------------------------------------|
| Functional Specifications  | Root elevator, Cryers pattern, available in Left and Right. |  |
| Applicable Standards       |                                                             |                                                                                    |
| Performance Specifications | Autoclaveable.<br>Expected service life 15 years.           |                                                                                    |
| Accessories                | None.                                                       |                                                                                    |
| Warranties                 | 1 year (excluding deliberate or accidental damage).         |                                                                                    |
| Instructions to Suppliers  |                                                             |                                                                                    |
| Note to Procurement        |                                                             |                                                                                    |



## Elevator: root, Warwick-James

| Catalogue Number | Item Name                               | Available on Transversal Contract | Contract Number or Code |
|------------------|-----------------------------------------|-----------------------------------|-------------------------|
| PHC-I-051        | Elevator: root, Warwick-James, straight | RT287-2015                        | RT287-06-014            |
| PHC-I-052        | Elevator: root, Warwick-James, left     | RT287-2015                        | RT287-06-012            |
| PHC-I-113        | Elevator: root, Warwick-James, right    | RT287-2015                        | RT287-06-013            |

|                            |                                                                              |                                                                                     |
|----------------------------|------------------------------------------------------------------------------|-------------------------------------------------------------------------------------|
| Functional Specifications  | Root elevator, Warwick-James pattern, available in Straight, Left and Right. |  |
| Applicable Standards       |                                                                              |                                                                                     |
| Performance Specifications | Autoclaveable.<br>Expected service life 15 years.                            |                                                                                     |
| Accessories                | None.                                                                        |                                                                                     |
| Warranties                 | 1 year (excluding deliberate or accidental damage).                          |                                                                                     |
| Instructions to Suppliers  |                                                                              |                                                                                     |
| Note to Procurement        |                                                                              |                                                                                     |



## Excavator: dental

| Catalogue Number | Item Name          | Available on Transversal Contract | Contract Number or Code |
|------------------|--------------------|-----------------------------------|-------------------------|
| PHC-I-053        | Excavator: 125/126 | RT287-2015                        | RT287-04-022            |
| PHC-I-054        | Excavator: 129/130 | RT287-2015                        | RT287-04-023            |
| PHC-I-055        | Excavator: 133/134 | RT287-2015                        | RT287-04-024            |

|                            |                                                                                                                                                                                                                                                                                          |  |
|----------------------------|------------------------------------------------------------------------------------------------------------------------------------------------------------------------------------------------------------------------------------------------------------------------------------------|--|
| Functional Specifications  | <p>RT287-04-022: No. 125/126, Blacks Formula: 25-90-9-8R / 25-10-9-8-L, serrated handle.</p> <p>RT287-04-023: No. 129/130, Blacks Formula: 17-90-9-8-R / 17-10-9-8-L, serrated handle.</p> <p>RT287-04-024: No. 133/134, Blacks Formula: 10-90-9-8-R / 10-10-9-8-L, serrated handle.</p> |  |
| Applicable Standards       |                                                                                                                                                                                                                                                                                          |  |
| Performance Specifications | <p>Autoclaveable.</p> <p>Expected service life 15 years.</p>                                                                                                                                                                                                                             |  |
| Accessories                | None.                                                                                                                                                                                                                                                                                    |  |
| Warranties                 | 1 year (excluding deliberate or accidental damage).                                                                                                                                                                                                                                      |  |
| Instructions to Suppliers  |                                                                                                                                                                                                                                                                                          |  |
| Note to Procurement        |                                                                                                                                                                                                                                                                                          |  |



## Flat plastic

| Catalogue Number | Item Name           | Available on Transversal Contract | Contract Number or Code |
|------------------|---------------------|-----------------------------------|-------------------------|
| PHC-I-056        | Flat plastic: No. 3 | RT287-2015                        | RT287-04-037            |
| PHC-I-057        | Flat plastic: No. 2 | RT287-2015                        | RT287-04-038            |

|                            |                                                                                                                                                                                               |  |
|----------------------------|-----------------------------------------------------------------------------------------------------------------------------------------------------------------------------------------------|--|
| Functional Specifications  | <p>RT287-04-037: Plugger, plastic filling, dental: Thymozine Inst. No. 3, serrated handle.</p> <p>RT287-04-038: Plugger, plastic filling, dental: Thymozine Inst. No. 2, serrated handle.</p> |  |
| Applicable Standards       |                                                                                                                                                                                               |  |
| Performance Specifications | <p>Autoclaveable.</p> <p>Expected service life 15 years.</p>                                                                                                                                  |  |
| Accessories                | None.                                                                                                                                                                                         |  |
| Warranties                 | 1 year (excluding deliberate or accidental damage).                                                                                                                                           |  |
| Instructions to Suppliers  |                                                                                                                                                                                               |  |
| Note to Procurement        |                                                                                                                                                                                               |  |

# Forceps: tongue



| Catalogue Number | Item Name       | Available on Transversal Contract | Contract Number or Code |
|------------------|-----------------|-----------------------------------|-------------------------|
| PHC-I-058        | Forceps: tongue | RT267-2015                        | RT267-06-043            |

|                            |                                                               |                                                                                    |
|----------------------------|---------------------------------------------------------------|------------------------------------------------------------------------------------|
| Functional Specifications  | Retractor, Oral: Tongue and Cheek Retractor<br>Copper; 150mm. |  |
| Applicable Standards       |                                                               |                                                                                    |
| Performance Specifications | Autoclaveable.<br>Expected service life 15 years.             |                                                                                    |
| Accessories                | None.                                                         |                                                                                    |
| Warranties                 | 1 year (excluding deliberate or accidental damage).           |                                                                                    |
| Instructions to Suppliers  |                                                               |                                                                                    |
| Note to Procurement        |                                                               |                                                                                    |



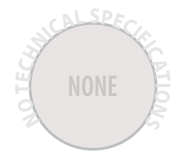

## Forceps: tooth extracting, Lower Anteriors Adult

| Catalogue Number | Item Name                                     | Available on Transversal Contract | Contract Number or Code |
|------------------|-----------------------------------------------|-----------------------------------|-------------------------|
| PHC-I-115        | Forceps: tooth extracting Lower Canines Adult | No                                |                         |

|                            |                                                     |                                                                                    |
|----------------------------|-----------------------------------------------------|------------------------------------------------------------------------------------|
| Functional Specifications  | Forceps for extracting Adult Lower Anteriors.       |  |
| Applicable Standards       |                                                     |                                                                                    |
| Performance Specifications | Standard cleaning and disinfection.                 |                                                                                    |
| Accessories                | None.                                               |                                                                                    |
| Warranties                 | 1 year (excluding deliberate or accidental damage). |                                                                                    |
| Instructions to Suppliers  |                                                     |                                                                                    |
| Note to Procurement        |                                                     |                                                                                    |

## Forceps: tooth extracting, Lower Bicuspid

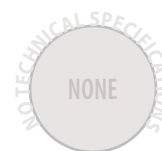

| Catalogue Number | Item Name                                 | Available on Transversal Contract | Contract Number or Code |
|------------------|-------------------------------------------|-----------------------------------|-------------------------|
| PHC-I-059        | Forceps: tooth extracting, Lower Bicuspid | RT287-2015                        | RT287-06-019            |

|                            |                                                     |                                                                                    |
|----------------------------|-----------------------------------------------------|------------------------------------------------------------------------------------|
| Functional Specifications  | Forceps: tooth extracting, Lower Bicuspid, No 13.   |  |
| Applicable Standards       |                                                     |                                                                                    |
| Performance Specifications | Autoclaveable.<br>Expected service life 15 years.   |                                                                                    |
| Accessories                | None.                                               |                                                                                    |
| Warranties                 | 1 year (excluding deliberate or accidental damage). |                                                                                    |
| Instructions to Suppliers  |                                                     |                                                                                    |
| Note to Procurement        |                                                     |                                                                                    |

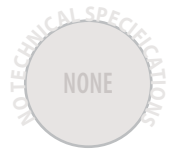

## Forceps: tooth extracting, Lower Canines Adult

| Catalogue Number | Item Name                                     | Available on Transversal Contract | Contract Number or Code |
|------------------|-----------------------------------------------|-----------------------------------|-------------------------|
| PHC-I-114        | Forceps: tooth extracting Lower Canines Adult | No                                |                         |

|                            |                                                    |                                                                                      |
|----------------------------|----------------------------------------------------|--------------------------------------------------------------------------------------|
| Functional Specifications  | Forceps for extracting Adult Lower Canines         |  |
| Applicable Standards       |                                                    |                                                                                      |
| Performance Specifications | Standard cleaning and disinfection.                |                                                                                      |
| Accessories                | None.                                              |                                                                                      |
| Warranties                 | 1 year (excluding deliberate or accidental damage) |                                                                                      |
| Instructions to Suppliers  |                                                    |                                                                                      |
| Note to Procurement        |                                                    |                                                                                      |

## Forceps: tooth extracting, Lower Molars



| Catalogue Number | Item Name                               | Available on Transversal Contract | Contract Number or Code |
|------------------|-----------------------------------------|-----------------------------------|-------------------------|
| PHC-I-060        | Forceps: tooth extracting, Lower Molars | RT287-2015                        | RT287-06-021            |

|                            |                                                                           |                                                                                    |
|----------------------------|---------------------------------------------------------------------------|------------------------------------------------------------------------------------|
| Functional Specifications  | Forceps: tooth extracting, Lower Molars, No 86<br>Narrow beak (Cow-horn). |  |
| Applicable Standards       |                                                                           |                                                                                    |
| Performance Specifications | Autoclaveable.<br>Expected service life 15 years.                         |                                                                                    |
| Accessories                | None.                                                                     |                                                                                    |
| Warranties                 | 1 year (excluding deliberate or accidental damage).                       |                                                                                    |
| Instructions to Suppliers  |                                                                           |                                                                                    |
| Note to Procurement        |                                                                           |                                                                                    |

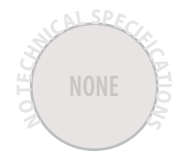

## Forceps: tooth extracting, Lower roots and Crowded Incisors

| Catalogue Number | Item Name                                                   | Available on Transversal Contract | Contract Number or Code |
|------------------|-------------------------------------------------------------|-----------------------------------|-------------------------|
| PHC-I-061        | Forceps: tooth extracting, Lower roots and Crowded Incisors | RT287-2015                        | RT287-06-022            |

|                            |                                                                                                             |                                                                                     |
|----------------------------|-------------------------------------------------------------------------------------------------------------|-------------------------------------------------------------------------------------|
| Functional Specifications  | <p>Forceps: tooth extracting, Lower roots and Crowded Incisors.</p> <p>No. 74N (cow-horn: narrow beak).</p> |  |
| Applicable Standards       |                                                                                                             |                                                                                     |
| Performance Specifications | <p>Autoclaveable.</p> <p>Expected service life 15 years.</p>                                                |                                                                                     |
| Accessories                | None.                                                                                                       |                                                                                     |
| Warranties                 | 1 year (excluding deliberate or accidental damage).                                                         |                                                                                     |
| Instructions to Suppliers  |                                                                                                             |                                                                                     |
| Note to Procurement        |                                                                                                             |                                                                                     |



## Forceps: tooth extracting, Upper Anteriors and Canines

| Catalogue Number | Item Name                                              | Available on Transversal Contract | Contract Number or Code |
|------------------|--------------------------------------------------------|-----------------------------------|-------------------------|
| PHC-I-062        | Forceps: tooth extracting, Upper Anteriors and Canines | RT287-2015                        | RT287-06-024            |

|                            |                                                                     |                                                                                     |
|----------------------------|---------------------------------------------------------------------|-------------------------------------------------------------------------------------|
| Functional Specifications  | Forceps: tooth extracting, Upper Anteriors and Canines.<br>No. 107. |  |
| Applicable Standards       |                                                                     |                                                                                     |
| Performance Specifications | Autoclaveable.<br>Expected service life 15 years.                   |                                                                                     |
| Accessories                | None.                                                               |                                                                                     |
| Warranties                 | 1 year (excluding deliberate or accidental damage).                 |                                                                                     |
| Instructions to Suppliers  |                                                                     |                                                                                     |
| Note to Procurement        |                                                                     |                                                                                     |



## Forceps: tooth extracting, Upper Bicuspids and Roots

| Catalogue Number | Item Name                                            | Available on Transversal Contract | Contract Number or Code |
|------------------|------------------------------------------------------|-----------------------------------|-------------------------|
| PHC-I-063        | Forceps: tooth extracting, Upper Bicuspids and Roots | RT287-2015                        | RT287-06-026            |

|                            |                                                              |                                                                                     |
|----------------------------|--------------------------------------------------------------|-------------------------------------------------------------------------------------|
| Functional Specifications  | Forceps: tooth extracting, Upper Bicuspids and Roots, No. 7. |  |
| Applicable Standards       |                                                              |                                                                                     |
| Performance Specifications | Autoclaveable.<br>Expected service life 15 years.            |                                                                                     |
| Accessories                | None.                                                        |                                                                                     |
| Warranties                 | 1 year (excluding deliberate or accidental damage).          |                                                                                     |
| Instructions to Suppliers  |                                                              |                                                                                     |
| Note to Procurement        |                                                              |                                                                                     |



## Forceps: tooth extracting, Upper Molars, Left

| Catalogue Number | Item Name                                     | Available on Transversal Contract | Contract Number or Code |
|------------------|-----------------------------------------------|-----------------------------------|-------------------------|
| PHC-I-064        | Forceps: tooth extracting, Upper Molars, Left | RT287-2015                        | RT287-06-027            |

|                            |                                                                    |                                                                                    |
|----------------------------|--------------------------------------------------------------------|------------------------------------------------------------------------------------|
| Functional Specifications  | Forceps: tooth extracting, Upper Molars, Left, No. 90N (Cow-horn). |  |
| Applicable Standards       |                                                                    |                                                                                    |
| Performance Specifications | Autoclaveable.<br>Expected service life 15 years.                  |                                                                                    |
| Accessories                | None.                                                              |                                                                                    |
| Warranties                 | 1 year (excluding deliberate or accidental damage).                |                                                                                    |
| Instructions to Suppliers  |                                                                    |                                                                                    |
| Note to Procurement        |                                                                    |                                                                                    |





## Forceps: tooth extracting, Upper Molars, Right

| Catalogue Number | Item Name                                      | Available on Transversal Contract | Contract Number or Code |
|------------------|------------------------------------------------|-----------------------------------|-------------------------|
| PHC-I-065        | Forceps: tooth extracting, Upper Molars, Right | RT287-2015                        | RT287-06-027            |

|                            |                                                         |                                                                                    |
|----------------------------|---------------------------------------------------------|------------------------------------------------------------------------------------|
| Functional Specifications  | Forceps: tooth extracting, Upper Molars, Right. No. 17. |  |
| Applicable Standards       |                                                         |                                                                                    |
| Performance Specifications | Autoclaveable.<br>Expected service life 15 years.       |                                                                                    |
| Accessories                | None.                                                   |                                                                                    |
| Warranties                 | 1 year (excluding deliberate or accidental damage).     |                                                                                    |
| Instructions to Suppliers  |                                                         |                                                                                    |
| Note to Procurement        |                                                         |                                                                                    |

## Forceps: tooth extracting, Upper Molars, Right



| Catalogue Number | Item Name                                      | Available on Transversal Contract | Contract Number or Code |
|------------------|------------------------------------------------|-----------------------------------|-------------------------|
| PHC-I-066        | Forceps: tooth extracting, Upper Molars, Right | RT287-2015                        | RT287-06-029            |

|                            |                                                                    |                                                                                    |
|----------------------------|--------------------------------------------------------------------|------------------------------------------------------------------------------------|
| Functional Specifications  | Forceps: tooth extracting, Upper Molars, Right. No. 89 (cow-horn). |  |
| Applicable Standards       |                                                                    |                                                                                    |
| Performance Specifications | Autoclaveable.<br>Expected service life 15 years.                  |                                                                                    |
| Accessories                | None.                                                              |                                                                                    |
| Warranties                 | 1 year (excluding deliberate or accidental damage).                |                                                                                    |
| Instructions to Suppliers  |                                                                    |                                                                                    |
| Note to Procurement        |                                                                    |                                                                                    |



## Forceps: tooth extracting, Upper roots

| Catalogue Number | Item Name                              | Available on Transversal Contract | Contract Number or Code |
|------------------|----------------------------------------|-----------------------------------|-------------------------|
| PHC-I-067        | Forceps: tooth extracting, Upper roots | RT287-2015                        | RT287-06-030            |

|                            |                                                     |                                                                                    |
|----------------------------|-----------------------------------------------------|------------------------------------------------------------------------------------|
| Functional Specifications  | Forceps: tooth extracting, Upper roots, No. 29.     |  |
| Applicable Standards       |                                                     |                                                                                    |
| Performance Specifications | Autoclaveable.<br>Expected service life 15 years.   |                                                                                    |
| Accessories                | None.                                               |                                                                                    |
| Warranties                 | 1 year (excluding deliberate or accidental damage). |                                                                                    |
| Instructions to Suppliers  |                                                     |                                                                                    |
| Note to Procurement        |                                                     |                                                                                    |

# Forceps: tooth extracting, Upper roots



| Catalogue Number | Item Name                              | Available on Transversal Contract | Contract Number or Code |
|------------------|----------------------------------------|-----------------------------------|-------------------------|
| PHC-I-068        | Forceps: tooth extracting, Upper roots | RT287-2015                        | RT287-06-031            |

|                            |                                                     |                                                                                    |
|----------------------------|-----------------------------------------------------|------------------------------------------------------------------------------------|
| Functional Specifications  | Forceps: tooth extracting, Upper roots, No 29S.     |  |
| Applicable Standards       |                                                     |                                                                                    |
| Performance Specifications | Autoclaveable.<br>Expected service life 15 years.   |                                                                                    |
| Accessories                | None.                                               |                                                                                    |
| Warranties                 | 1 year (excluding deliberate or accidental damage). |                                                                                    |
| Instructions to Suppliers  |                                                     |                                                                                    |
| Note to Procurement        |                                                     |                                                                                    |



## Forceps: tooth extracting, Upper roots

| Catalogue Number | Item Name                              | Available on Transversal Contract | Contract Number or Code |
|------------------|----------------------------------------|-----------------------------------|-------------------------|
| PHC-I-069        | Forceps: tooth extracting, Upper roots | RT287-2015                        | RT287-06-032            |

|                            |                                                     |                                                                                    |
|----------------------------|-----------------------------------------------------|------------------------------------------------------------------------------------|
| Functional Specifications  | Forceps: tooth extracting, Upper roots, No 44 N.    |  |
| Applicable Standards       |                                                     |                                                                                    |
| Performance Specifications | Autoclaveable.<br>Expected service life 15 years.   |                                                                                    |
| Accessories                | None.                                               |                                                                                    |
| Warranties                 | 1 year (excluding deliberate or accidental damage). |                                                                                    |
| Instructions to Suppliers  |                                                     |                                                                                    |
| Note to Procurement        |                                                     |                                                                                    |

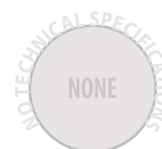

## Forceps: tooth extracting, Upper roots

| Catalogue Number | Item Name                              | Available on Transversal Contract | Contract Number or Code |
|------------------|----------------------------------------|-----------------------------------|-------------------------|
| PHC-I-070        | Forceps: tooth extracting, Upper roots | RT287-2015                        | RT287-06-033            |

|                            |                                                        |                                                                                    |
|----------------------------|--------------------------------------------------------|------------------------------------------------------------------------------------|
| Functional Specifications  | Forceps: tooth extracting, Upper roots, No. 76 (Read). |  |
| Applicable Standards       |                                                        |                                                                                    |
| Performance Specifications | Autoclaveable.<br>Expected service life 15 years.      |                                                                                    |
| Accessories                | None.                                                  |                                                                                    |
| Warranties                 | 1 year (excluding deliberate or accidental damage).    |                                                                                    |
| Instructions to Suppliers  |                                                        |                                                                                    |
| Note to Procurement        |                                                        |                                                                                    |



## Forceps: tooth extracting, Upper roots, Small

| Catalogue Number | Item Name                                     | Available on Transversal Contract | Contract Number or Code |
|------------------|-----------------------------------------------|-----------------------------------|-------------------------|
| PHC-I-071        | Forceps: tooth extracting, Upper roots, Small | RT287-2015                        | RT287-06-034            |

|                            |                                                               |                                                                                    |
|----------------------------|---------------------------------------------------------------|------------------------------------------------------------------------------------|
| Functional Specifications  | Forceps: tooth extracting, Upper roots, Small, No. 76 (Read). |  |
| Applicable Standards       |                                                               |                                                                                    |
| Performance Specifications | Autoclaveable.<br>Expected service life 15 years.             |                                                                                    |
| Accessories                | None.                                                         |                                                                                    |
| Warranties                 | 1 year (excluding deliberate or accidental damage).           |                                                                                    |
| Instructions to Suppliers  |                                                               |                                                                                    |
| Note to Procurement        |                                                               |                                                                                    |



## Forceps: tooth extracting, Lower molars, child

| Catalogue Number | Item Name                                      | Available on Transversal Contract | Contract Number or Code |
|------------------|------------------------------------------------|-----------------------------------|-------------------------|
| PHC-I-072        | Forceps: tooth extracting, Lower molars, child | RT287-2015                        | RT287-06-035            |

|                            |                                                                    |                                                                                    |
|----------------------------|--------------------------------------------------------------------|------------------------------------------------------------------------------------|
| Functional Specifications  | Forceps: tooth extracting, Lower molars, children pattern No. 161. |  |
| Applicable Standards       |                                                                    |                                                                                    |
| Performance Specifications | Autoclaveable.<br>Expected service life 15 years.                  |                                                                                    |
| Accessories                | None.                                                              |                                                                                    |
| Warranties                 | 1 year (excluding deliberate or accidental damage).                |                                                                                    |
| Instructions to Suppliers  |                                                                    |                                                                                    |
| Note to Procurement        |                                                                    |                                                                                    |





## Forceps: tooth extracting, Lower teeth and roots, child

| Catalogue Number | Item Name                                                  | Available on Transversal Contract | Contract Number or Code |
|------------------|------------------------------------------------------------|-----------------------------------|-------------------------|
| PHC-I-073        | Forceps: tooth extracting,<br>Lower teeth and roots, child | RT287-2015                        | RT287-06-036            |

|                            |                                                                             |                                                                                    |
|----------------------------|-----------------------------------------------------------------------------|------------------------------------------------------------------------------------|
| Functional Specifications  | Forceps: tooth extracting, Lower teeth and roots, children pattern No. 123. |  |
| Applicable Standards       |                                                                             |                                                                                    |
| Performance Specifications | Autoclaveable.<br>Expected service life 15 years.                           |                                                                                    |
| Accessories                | None.                                                                       |                                                                                    |
| Warranties                 | 1 year (excluding deliberate or accidental damage).                         |                                                                                    |
| Instructions to Suppliers  |                                                                             |                                                                                    |
| Note to Procurement        |                                                                             |                                                                                    |



## Forceps: tooth extracting, Upper Incisors and Canines, child

| Catalogue Number | Item Name                                                    | Available on Transversal Contract | Contract Number or Code |
|------------------|--------------------------------------------------------------|-----------------------------------|-------------------------|
| PHC-I-074        | Forceps: tooth extracting, Upper Incisors and Canines, child | RT287-2015                        | RT287-06-037            |

|                            |                                                                                 |                                                                                     |
|----------------------------|---------------------------------------------------------------------------------|-------------------------------------------------------------------------------------|
| Functional Specifications  | Forceps: tooth extracting, Upper Incisors and Canines, children pattern No. 37. |  |
| Applicable Standards       |                                                                                 |                                                                                     |
| Performance Specifications | Autoclaveable.<br>Expected service life 15 years.                               |                                                                                     |
| Accessories                | None.                                                                           |                                                                                     |
| Warranties                 | 1 year (excluding deliberate or accidental damage).                             |                                                                                     |
| Instructions to Suppliers  |                                                                                 |                                                                                     |
| Note to Procurement        |                                                                                 |                                                                                     |



## Forceps: tooth extracting, Upper Molars, child

| Catalogue Number | Item Name                                      | Available on Transversal Contract | Contract Number or Code |
|------------------|------------------------------------------------|-----------------------------------|-------------------------|
| PHC-I-075        | Forceps: tooth extracting, Upper Molars, child | RT287-2015                        | RT287-06-038            |

|                            |                                                                   |                                                                                     |
|----------------------------|-------------------------------------------------------------------|-------------------------------------------------------------------------------------|
| Functional Specifications  | Forceps: tooth extracting, Upper Molars, children pattern, No 39. |  |
| Applicable Standards       |                                                                   |                                                                                     |
| Performance Specifications | Autoclaveable.<br>Expected service life 15 years.                 |                                                                                     |
| Accessories                | None.                                                             |                                                                                     |
| Warranties                 | 1 year (excluding deliberate or accidental damage).               |                                                                                     |
| Instructions to Suppliers  |                                                                   |                                                                                     |
| Note to Procurement        |                                                                   |                                                                                     |

## Forceps: tooth extracting, Upper teeth and roots, Molars, child



| Catalogue Number | Item Name                                                       | Available on Transversal Contract | Contract Number or Code |
|------------------|-----------------------------------------------------------------|-----------------------------------|-------------------------|
| PHC-I-076        | Forceps: tooth extracting, Upper teeth and roots, Molars, child | RT287-2015                        | RT287-06-039            |

|                            |                                                                                      |                                                                                     |
|----------------------------|--------------------------------------------------------------------------------------|-------------------------------------------------------------------------------------|
| Functional Specifications  | Forceps: tooth extracting, Upper teeth and roots, Molars, children pattern, No. 138. |  |
| Applicable Standards       |                                                                                      |                                                                                     |
| Performance Specifications | Autoclaveable.<br>Expected service life 15 years.                                    |                                                                                     |
| Accessories                | None.                                                                                |                                                                                     |
| Warranties                 | 1 year (excluding deliberate or accidental damage).                                  |                                                                                     |
| Instructions to Suppliers  |                                                                                      |                                                                                     |
| Note to Procurement        |                                                                                      |                                                                                     |



## Forceps: wire ligature

| Catalogue Number | Item Name              | Available on Transversal Contract | Contract Number or Code |
|------------------|------------------------|-----------------------------------|-------------------------|
| PHC-I-077        | Forceps: wire ligature | RT287-2015                        | RT287-06-016            |

|                            |                                                                                                       |                                                                                    |
|----------------------------|-------------------------------------------------------------------------------------------------------|------------------------------------------------------------------------------------|
| Functional Specifications  | Pliers, Dental: Wire Ligature Twister, Surgical, 150mm, Tungsten Carbide Tips with Pyramidal Profile. |  |
| Applicable Standards       |                                                                                                       |                                                                                    |
| Performance Specifications | Autoclaveable.<br>Expected service life 15 years.                                                     |                                                                                    |
| Accessories                | None.                                                                                                 |                                                                                    |
| Warranties                 | 1 year (excluding deliberate or accidental damage).                                                   |                                                                                    |
| Instructions to Suppliers  |                                                                                                       |                                                                                    |
| Note to Procurement        |                                                                                                       |                                                                                    |

## Gag (mouth prop)



| Catalogue Number | Item Name                | Available on Transversal Contract | Contract Number or Code |
|------------------|--------------------------|-----------------------------------|-------------------------|
| PHC-I-078        | Gag (mouth prop): large  | RT287-2015                        | RT287-06-050            |
| PHC-I-079        | Gag (mouth prop): medium | RT287-2015                        | RT287-06-051            |
| PHC-I-080        | Gag (mouth prop): small  | RT287-2015                        | RT287-06-052            |

|                            |                                                                                              |
|----------------------------|----------------------------------------------------------------------------------------------|
| Functional Specifications  | Mouth Prop, Dental: Rubber with Stainless Steel Insert.<br>In Large, medium and Small sizes. |
| Applicable Standards       |                                                                                              |
| Performance Specifications | Autoclaveable.<br>Expected service life 15 years.                                            |
| Accessories                | None.                                                                                        |
| Warranties                 | 1 year (excluding deliberate or accidental damage).                                          |
| Instructions to Suppliers  |                                                                                              |
| Note to Procurement        |                                                                                              |



## Holder: Bib

| Catalogue Number | Item Name  | Available on Transversal Contract | Contract Number or Code |
|------------------|------------|-----------------------------------|-------------------------|
| PHC-I-081        | Bib holder | RT287-2015                        | RT287-07-014            |

|                            |                                                                                    |
|----------------------------|------------------------------------------------------------------------------------|
| Functional Specifications  | Holder, Napkin, Dental: Round Plastic or Chain Necklace with two Alligators Clips. |
| Applicable Standards       |                                                                                    |
| Performance Specifications | Standard cleaning and disinfection.<br>Expected service life 5 years.              |
| Accessories                | None.                                                                              |
| Warranties                 | 1 year (excluding deliberate or accidental damage).                                |
| Instructions to Suppliers  |                                                                                    |
| Note to Procurement        |                                                                                    |



## Holder: cotton pellet

| Catalogue Number | Item Name            | Available on Transversal Contract | Contract Number or Code |
|------------------|----------------------|-----------------------------------|-------------------------|
| PHC-I-082        | Cotton pellet holder | RT287-2015                        | RT287-07-010            |

|                            |                                                                                                                                |
|----------------------------|--------------------------------------------------------------------------------------------------------------------------------|
| Functional Specifications  | Dispenser, Cotton Pellet, Dental: Chrome Plated Brass with Mesh Top, Spring Loaded Placement, Flip Cover, 42,5 x 42,5 x 48mm . |
| Applicable Standards       |                                                                                                                                |
| Performance Specifications | Autoclaveable.<br>Expected service life 15 years.                                                                              |
| Accessories                | None.                                                                                                                          |
| Warranties                 | 1 year (excluding deliberate or accidental damage).                                                                            |
| Instructions to Suppliers  |                                                                                                                                |
| Note to Procurement        |                                                                                                                                |





## Matrix retainer

| Catalogue Number | Item Name               | Available on Transversal Contract | Contract Number or Code |
|------------------|-------------------------|-----------------------------------|-------------------------|
| PHC-I-083        | Matrix retainer: narrow | RT287-2015                        | RT287-04-041            |
| PHC-I-084        | Matrix retainer: wide   | RT287-2015                        | RT287-04-042            |

|                            |                                                                                                                                   |                                                                                     |
|----------------------------|-----------------------------------------------------------------------------------------------------------------------------------|-------------------------------------------------------------------------------------|
| Functional Specifications  | <p>RT287-04-041: Retainer, matrix, dental: Siqueland, narrow.</p> <p>RT287-04-042: Retainer, matrix, dental: Siqueland, wide.</p> |  |
| Applicable Standards       |                                                                                                                                   |                                                                                     |
| Performance Specifications | <p>Autoclaveable.</p> <p>Expected service life 15 years.</p>                                                                      |                                                                                     |
| Accessories                | None.                                                                                                                             |                                                                                     |
| Warranties                 | 1 year (excluding deliberate or accidental damage).                                                                               |                                                                                     |
| Instructions to Suppliers  |                                                                                                                                   |                                                                                     |
| Note to Procurement        |                                                                                                                                   |                                                                                     |



## Mouth Mirror

| Catalogue Number | Item Name                   | Available on Transversal Contract | Contract Number or Code |
|------------------|-----------------------------|-----------------------------------|-------------------------|
| PHC-I-085        | Mouth Mirror: Handle        | RT287-2015                        | RT287-01-005            |
| PHC-I-086        | Mirror: head, to fit handle | RT287-2015                        | RT287-01-007            |

|                            |                                                                                                                                                                                                                     |                                                                                     |
|----------------------------|---------------------------------------------------------------------------------------------------------------------------------------------------------------------------------------------------------------------|-------------------------------------------------------------------------------------|
| Functional Specifications  | <p>RT287-01-005: Serrated handle for mouth examining mirror. Metric thread.</p> <p>RT287-01-007: Mirror for mouth examination. Metal with simple screw stem and metric thread, plane front-surface, size No. 4.</p> |  |
| Applicable Standards       |                                                                                                                                                                                                                     |                                                                                     |
| Performance Specifications | <p>Autoclaveable.</p> <p>Expected service life 15 years.</p>                                                                                                                                                        |                                                                                     |
| Accessories                | None.                                                                                                                                                                                                               |                                                                                     |
| Warranties                 | 1 year (excluding deliberate or accidental damage).                                                                                                                                                                 |                                                                                     |
| Instructions to Suppliers  |                                                                                                                                                                                                                     |                                                                                     |
| Note to Procurement        |                                                                                                                                                                                                                     |                                                                                     |



# Needle holder

| Catalogue Number | Item Name     | Available on Transversal Contract | Contract Number or Code |
|------------------|---------------|-----------------------------------|-------------------------|
| PHC-I-087        | Needle holder | RT287-2015                        | RT287-06-040            |

|                            |                                                                                                             |
|----------------------------|-------------------------------------------------------------------------------------------------------------|
| Functional Specifications  | Holder, Suture Needle: Dental, Crile-Wood, Tungsten Carbide Inserts with a Ground Pyramidal Profile, 150mm. |
| Applicable Standards       |                                                                                                             |
| Performance Specifications | Autoclaveable.<br>Expected service life 15 years.                                                           |
| Accessories                | None.                                                                                                       |
| Warranties                 | 1 year (excluding deliberate or accidental damage).                                                         |
| Instructions to Suppliers  |                                                                                                             |
| Note to Procurement        |                                                                                                             |

## Periodontal Hoe

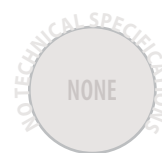

| Catalogue Number | Item Name              | Available on Transversal Contract | Contract Number or Code |
|------------------|------------------------|-----------------------------------|-------------------------|
| PHC-I-117        | Periodontal Hoe: SG 5F | RT287-2015                        | RT287-03-025            |

|                            |                                                            |                                                                                     |
|----------------------------|------------------------------------------------------------|-------------------------------------------------------------------------------------|
| Functional Specifications  | Hoe, Periodontal: Goldman Fox No. SG F 5, serrated handle. |  |
| Applicable Standards       |                                                            |                                                                                     |
| Performance Specifications | Standard cleaning and disinfection.                        |                                                                                     |
| Accessories                | None.                                                      |                                                                                     |
| Warranties                 | 1 year (excluding deliberate or accidental damage).        |                                                                                     |
| Instructions to Suppliers  |                                                            |                                                                                     |
| Note to Procurement        |                                                            |                                                                                     |

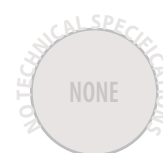

## Rongeur: dental

| Catalogue Number | Item Name              | Available on Transversal Contract | Contract Number or Code |
|------------------|------------------------|-----------------------------------|-------------------------|
| PHC-I-088        | Rongeur: dental No. 4  | RT287-2015                        | RT287-06-017            |
| PHC-I-089        | Rongeur: dental No. 5S | RT287-2015                        | RT287-06-018            |

|                            |                                                     |                                                                                    |
|----------------------------|-----------------------------------------------------|------------------------------------------------------------------------------------|
| Functional Specifications  | Rongeur: Dental, No. 4 and No5S.                    |  |
| Applicable Standards       |                                                     |                                                                                    |
| Performance Specifications | Autoclaveable.<br>Expected service life 15 years.   |                                                                                    |
| Accessories                | None.                                               |                                                                                    |
| Warranties                 | 1 year (excluding deliberate or accidental damage). |                                                                                    |
| Instructions to Suppliers  |                                                     |                                                                                    |
| Note to Procurement        |                                                     |                                                                                    |

# Scaler, Dental

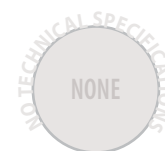

| Catalogue Number | Item Name            | Available on Transversal Contract | Contract Number or Code |
|------------------|----------------------|-----------------------------------|-------------------------|
| PHC-I-116        | Scaler, Dental: H6/7 | RT287-2015                        | RT287-03-029            |

|                            |                                                        |                                                                                     |
|----------------------------|--------------------------------------------------------|-------------------------------------------------------------------------------------|
| Functional Specifications  | Scaler, Dental: Hygienist No. SH 6/7, serrated handle. |  |
| Applicable Standards       |                                                        |                                                                                     |
| Performance Specifications | Standard cleaning and disinfection.                    |                                                                                     |
| Accessories                | None.                                                  |                                                                                     |
| Warranties                 | 1 year (excluding deliberate or accidental damage).    |                                                                                     |
| Instructions to Suppliers  |                                                        |                                                                                     |
| Note to Procurement        |                                                        |                                                                                     |



## Scissors: ligature

| Catalogue Number | Item Name          | Available on Transversal Contract | Contract Number or Code |
|------------------|--------------------|-----------------------------------|-------------------------|
| PHC-I-093        | Scissors: ligature | RT287-2015                        | RT287-06-047            |

|                            |                                                                         |
|----------------------------|-------------------------------------------------------------------------|
| Functional Specifications  | Scissors, Medical Wire: Wire Cutting, Notched, Tungsten Inserts, 120mm. |
| Applicable Standards       |                                                                         |
| Performance Specifications | Autoclaveable.<br>Expected service life 15 years.                       |
| Accessories                | None.                                                                   |
| Warranties                 | 1 year (excluding deliberate or accidental damage).                     |
| Instructions to Suppliers  |                                                                         |
| Note to Procurement        |                                                                         |

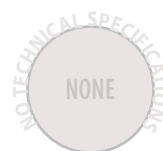

## Slab: mixing, glass

| Catalogue Number | Item Name          | Available on Transversal Contract | Contract Number or Code |
|------------------|--------------------|-----------------------------------|-------------------------|
| PHC-I-090        | Mixing slab, glass | RT287-2015                        | RT287-07-015            |

|                            |                                                        |
|----------------------------|--------------------------------------------------------|
| Functional Specifications  | Mixing Slab, Dental: Glass, Large, 150 x 75 x 18-20mm. |
| Applicable Standards       |                                                        |
| Performance Specifications | Autoclaveable.<br>Expected service life 15 years.      |
| Accessories                | None.                                                  |
| Warranties                 | 1 year (excluding deliberate or accidental damage).    |
| Instructions to Suppliers  |                                                        |
| Note to Procurement        |                                                        |



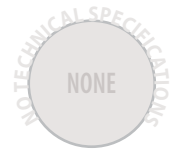

# Spatula: Cement

| Catalogue Number | Item Name       | Available on Transversal Contract | Contract Number or Code |
|------------------|-----------------|-----------------------------------|-------------------------|
| PHC-I-094        | Spatula: Cement | RT287-2015                        | RT287-04-061            |

|                            |                                                     |
|----------------------------|-----------------------------------------------------|
| Functional Specifications  | Spatula, dental: Cement, double ended, No. 8.       |
| Applicable Standards       |                                                     |
| Performance Specifications | Autoclaveable.<br>Expected service life 15 years.   |
| Accessories                | None.                                               |
| Warranties                 | 1 year (excluding deliberate or accidental damage). |
| Instructions to Suppliers  |                                                     |
| Note to Procurement        |                                                     |

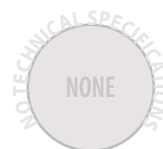

## Syringe: dental, aspirating

| Catalogue Number | Item Name                   | Available on Transversal Contract | Contract Number or Code |
|------------------|-----------------------------|-----------------------------------|-------------------------|
| PHC-I-095        | Syringe: dental, aspirating | RT287-2015                        | RT287-04-066            |

|                            |                                                                                                                                     |
|----------------------------|-------------------------------------------------------------------------------------------------------------------------------------|
| Functional Specifications  | Syringe, cartridge: Aspirating, 1.8 ml Carpule, SL 33 needle attachment with short cartridge pick, No. SL 18 C, double claw plunge. |
| Applicable Standards       |                                                                                                                                     |
| Performance Specifications | Autoclaveable.<br>Expected service life 15 years.                                                                                   |
| Accessories                | None.                                                                                                                               |
| Warranties                 | 1 year (excluding deliberate or accidental damage).                                                                                 |
| Instructions to Suppliers  |                                                                                                                                     |
| Note to Procurement        |                                                                                                                                     |

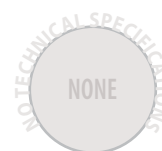

## Trimmer: Gingival margin

| Catalogue Number | Item Name                | Available on Transversal Contract | Contract Number or Code |
|------------------|--------------------------|-----------------------------------|-------------------------|
| PHC-I-096        | Trimmer: Gingival margin | RT287-2015                        | RT287-04-028            |
| PHC-I-097        | Trimmer: Gingival margin | RT287-2015                        | RT287-04-029            |

|                            |                                                                                                                                                                                                                     |                                                                                    |
|----------------------------|---------------------------------------------------------------------------------------------------------------------------------------------------------------------------------------------------------------------|------------------------------------------------------------------------------------|
| Functional Specifications  | <p>RT287-04-028: Trimmer, gingival margin: No. TC U1/U2, Blacks Formula: 10-80-8-12, serrated handle.</p> <p>RT287-04-029: Trimmer, gingival margin: No. TC U3/U4, Blacks Formula: 10-95-8-12, serrated handle.</p> |  |
| Applicable Standards       |                                                                                                                                                                                                                     |                                                                                    |
| Performance Specifications | <p>Autoclaveable.</p> <p>Expected service life 15 years.</p>                                                                                                                                                        |                                                                                    |
| Accessories                | None.                                                                                                                                                                                                               |                                                                                    |
| Warranties                 | 1 year (excluding deliberate or accidental damage).                                                                                                                                                                 |                                                                                    |
| Instructions to Suppliers  |                                                                                                                                                                                                                     |                                                                                    |
| Note to Procurement        |                                                                                                                                                                                                                     |                                                                                    |

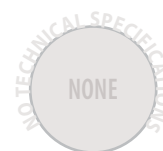

## Tweezers: Cotton and Dressing

| Catalogue Number | Item Name                    | Available on Transversal Contract | Contract Number or Code |
|------------------|------------------------------|-----------------------------------|-------------------------|
| PHC-I-098        | Cotton and Dressing Tweezers | RT287-2015                        | RT287-04-030            |
| PHC-I-099        | Cotton and Dressing Tweezers | RT287-2015                        | RT287-04-031            |

|                            |                                                                                                                                                                                                                                                                                      |                                                                                     |
|----------------------------|--------------------------------------------------------------------------------------------------------------------------------------------------------------------------------------------------------------------------------------------------------------------------------------|-------------------------------------------------------------------------------------|
| Functional Specifications  | <p>RT287-04-030: Forceps, dressing: Dental, Approx. 1mm Serrated Blade, <math>\pm</math> 150mm Length, serrated handle No DP 17.</p> <p>RT287-04-031: Forceps, dressing: Dental Approx. 1mm Serrated Blade, <math>\pm</math> 150mm Length, serrated handle with Lock No. DP 18L.</p> |  |
| Applicable Standards       |                                                                                                                                                                                                                                                                                      |                                                                                     |
| Performance Specifications | <p>Autoclaveable.</p> <p>Expected service life 15 years.</p>                                                                                                                                                                                                                         |                                                                                     |
| Accessories                | None.                                                                                                                                                                                                                                                                                |                                                                                     |
| Warranties                 | 1 year (excluding deliberate or accidental damage).                                                                                                                                                                                                                                  |                                                                                     |
| Instructions to Suppliers  |                                                                                                                                                                                                                                                                                      |                                                                                     |
| Note to Procurement        |                                                                                                                                                                                                                                                                                      |                                                                                     |

# Rehabilitation

## PHYSICAL THERAPY

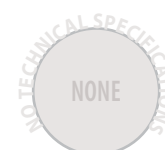

### Scissors: standard

| Catalogue Number | Item Name                 | Available on Transversal Contract | Contract Number or Code |
|------------------|---------------------------|-----------------------------------|-------------------------|
| PHC-I-100        | Scissors: standard, adult | No                                |                         |
| PHC-I-101        | Scissors: standard, child | No                                |                         |

|                            |                                                                                                                                        |
|----------------------------|----------------------------------------------------------------------------------------------------------------------------------------|
| Functional Specifications  | Scissors, adult right handed. Hard plastic handles, durable.<br>Scissors, kids, left-and right- handed. Hard plastic handles, durable. |
| Applicable Standards       | For cutting things such as strapping, material, Velcro, paper, etc.                                                                    |
| Performance Specifications | Standard cleaning and disinfection.                                                                                                    |
| Accessories                | None.                                                                                                                                  |
| Warranties                 | 1 year (excluding deliberate or accidental damage).                                                                                    |
| Instructions to Suppliers  |                                                                                                                                        |
| Note to Procurement        |                                                                                                                                        |

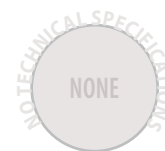

## Scissors: splinting

| Catalogue Number | Item Name           | Available on Transversal Contract | Contract Number or Code |
|------------------|---------------------|-----------------------------------|-------------------------|
| PHC-I-102        | Scissors: splinting | No                                |                         |

|                            |                                                                                                   |
|----------------------------|---------------------------------------------------------------------------------------------------|
| Functional Specifications  | Heavy duty scissors. Slight curve to the blades. Must be able to cut warm thermoplastics cleanly. |
| Applicable Standards       | Cutting and shaping thermoplastic splinting materials.                                            |
| Performance Specifications | Standard cleaning and disinfection.                                                               |
| Accessories                | None.                                                                                             |
| Warranties                 | 1 year (excluding deliberate or accidental damage).                                               |
| Instructions to Suppliers  |                                                                                                   |
| Note to Procurement        |                                                                                                   |

# AUDIOLOGY/SPEECH THERAPY

## Cerumen management kit

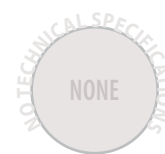

| Catalogue Number | Item Name                      | Available on Transversal Contract | Contract Number or Code |
|------------------|--------------------------------|-----------------------------------|-------------------------|
| PHC-I-103        | Ear irrigation sprayer: manual | RT274-2018ME                      | 42182409-00032          |

|                            |                                                                                                                               |
|----------------------------|-------------------------------------------------------------------------------------------------------------------------------|
| Functional Specifications  | Ear irrigation sprayer: 1 spray wash bottle (470ml) with 20 specialised ear irrigation tips and 1 irrigation basin.           |
| Applicable Standards       |                                                                                                                               |
| Performance Specifications | Standard cleaning and disinfection.                                                                                           |
| Accessories                | Note that for complete cerumen management, the curettes, ear loop and crocodile forceps listed hereafter, are also required.. |
| Warranties                 | 1 year (excluding deliberate or accidental damage).                                                                           |
| Instructions to Suppliers  |                                                                                                                               |
| Note to Procurement        |                                                                                                                               |

## Curette: cerumen, plastic

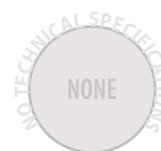

| Catalogue Number | Item Name                             | Available on Transversal Contract | Contract Number or Code |
|------------------|---------------------------------------|-----------------------------------|-------------------------|
| PHC-I-105        | Curette: cerumen, plastic, adult      | RT274-2018ME                      | 42291607-00003          |
| PHC-I-106        | Curette: cerumen, plastic, paediatric | RT274-2018ME                      | 42291607-00004          |
|                  |                                       |                                   |                         |

|                            |                                                                                                   |
|----------------------------|---------------------------------------------------------------------------------------------------|
| Functional Specifications  | Plastic cerumen curettes: adult. Pack of 10.<br>Plastic cerumen curettes: paediatric. Pack of 10. |
| Applicable Standards       |                                                                                                   |
| Performance Specifications |                                                                                                   |
| Accessories                | None.                                                                                             |
| Warranties                 |                                                                                                   |
| Instructions to Suppliers  |                                                                                                   |
| Note to Procurement        |                                                                                                   |



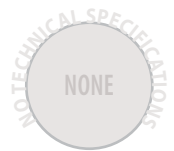

## Curette: cerumen, lighted

| Catalogue Number | Item Name                            | Available on Transversal Contract | Contract Number or Code |
|------------------|--------------------------------------|-----------------------------------|-------------------------|
| PHC-I-107        | Curette: cerumen, lighted, magnified | RT274-2018ME                      | RT274-2018ME            |

|                            |                                                     |
|----------------------------|-----------------------------------------------------|
| Functional Specifications  |                                                     |
| Applicable Standards       |                                                     |
| Performance Specifications | Standard cleaning and disinfection.                 |
| Accessories                | Replacement light.<br>Replacement curettes.         |
| Warranties                 | 1 year (excluding deliberate or accidental damage). |
| Instructions to Suppliers  |                                                     |
| Note to Procurement        |                                                     |

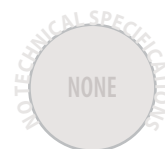

## Ear loop: Bileau, small

| Catalogue Number | Item Name               | Available on Transversal Contract | Contract Number or Code |
|------------------|-------------------------|-----------------------------------|-------------------------|
| PHC-I-108        | Ear loop: Bileau, small | RT274-2018ME                      | 42182419-00570          |

|                            |                                                     |
|----------------------------|-----------------------------------------------------|
| Functional Specifications  |                                                     |
| Applicable Standards       |                                                     |
| Performance Specifications | Standard cleaning and disinfection.                 |
| Accessories                | None.                                               |
| Warranties                 | 1 year (excluding deliberate or accidental damage). |
| Instructions to Suppliers  |                                                     |
| Note to Procurement        |                                                     |

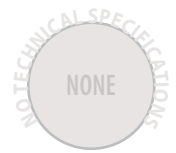

## Forceps: crocodile

| Catalogue Number | Item Name          | Available on Transversal Contract | Contract Number or Code |
|------------------|--------------------|-----------------------------------|-------------------------|
| PHC-I-109        | Forceps: crocodile | RT274-2018ME                      | 42182419-00569          |

|                            |                                                                       |
|----------------------------|-----------------------------------------------------------------------|
| Functional Specifications  | Stainless steel. Box joint. Serrated jaws. Finger rings both handles. |
| Applicable Standards       | ISO 13402:1995, ISO 7151:1988, ISO 7153-1:2016, ISO900101 & ISO13485. |
| Performance Specifications | Standard cleaning and disinfection.<br>Expected service life 10 years |
| Accessories                | None.                                                                 |
| Warranties                 | 5 years (excluding deliberate or accidental damage).                  |
| Instructions to Suppliers  |                                                                       |
| Note to Procurement        |                                                                       |

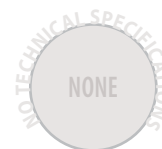

## Syringe: impression

| Catalogue Number | Item Name           | Available on Transversal Contract | Contract Number or Code |
|------------------|---------------------|-----------------------------------|-------------------------|
| PHC-I-110        | Syringe: impression | RT274-2018ME                      | RT274-2018ME            |

|                            |                                                                                                                                               |
|----------------------------|-----------------------------------------------------------------------------------------------------------------------------------------------|
| Functional Specifications  | Syringe for ear mould impression, 10-15cm in length Syringe suitable for making ear mould impressions, with double plunge impression syringe. |
| Applicable Standards       |                                                                                                                                               |
| Performance Specifications | Standard cleaning and disinfection.                                                                                                           |
| Accessories                | None.                                                                                                                                         |
| Warranties                 | 1 year (excluding deliberate or accidental damage).                                                                                           |
| Instructions to Suppliers  |                                                                                                                                               |
| Note to Procurement        |                                                                                                                                               |

# C consumables clinical

## CLINICAL STATIONERY 268

|                                     |     |
|-------------------------------------|-----|
| Appointment cards: general          | 268 |
| Maternity health record             | 269 |
| Patient information register        | 270 |
| Patient record for adults           | 271 |
| Patient record for children         | 272 |
| Referral forms: general             | 273 |
| Referral forms: WBPHCOT             | 274 |
| Register: assets                    | 275 |
| Register: Daily reception headcount | 276 |
| Register: Monthly tally summary     | 277 |
| Register: Patient safety incident   | 278 |
| Register: PHC comprehensive         | 279 |
| Register: Weekly tally notepad      | 280 |
| Road to Health Booklet for Boys     | 281 |
| Road to Health Booklet for Girls    | 282 |
| Sick note                           | 283 |
| Temperature recording forms         | 284 |

## SURGICAL 285

|                                                            |     |
|------------------------------------------------------------|-----|
| AED replacement Pads                                       | 285 |
| Amniotomy hook                                             | 286 |
| Antibacterial filter: portable suction machine             | 287 |
| Antibacterial filter: trolley suction                      | 288 |
| Bandage: crepe                                             | 289 |
| Blade: scalpel                                             | 290 |
| Blade: stitch-cutter                                       | 291 |
| Catheter: intrathoracic, silicon                           | 292 |
| Catheter: suction                                          | 293 |
| Cotton wool: balls 1g (500s)                               | 294 |
| Drainage system: chest, underwater, adult                  | 295 |
| Dressing pack: disposable                                  | 296 |
| ECG electrodes: disposable, self-adhesive, for resting ECG | 297 |
| Endotracheal tubes: cuffed                                 | 298 |
| Endotracheal tubes: uncuffed                               | 299 |
| Eye patch: disposable                                      | 300 |
| Gauze: absorbent, Type 1, sterile, peel pack (5 swabs)     | 301 |
| Gauze: paraffin, 100X100 (box of 10)                       | 302 |
| Gauze: swabs, plain                                        | 303 |
| Intravenous administration set                             | 304 |
| Intravenous cannula                                        | 305 |
| Intravenous cannula: winged                                | 306 |
| Lubricant gel, sterile                                     | 307 |
| Mask: laryngeal, adult                                     | 308 |
| Mask: oxygen, diluter type                                 | 309 |
| Mask: oxygen, re-breathing type                            | 310 |
| Nasal Cannula: oxygen                                      | 311 |
| Nasogastric catheter                                       | 312 |
| Needles: hypodermic                                        | 313 |
| Needles: Hypodermic, Dental                                | 314 |
| Padding: cast orthopaedic                                  | 315 |
| Plaster of Paris bandage                                   | 316 |
| Peak Flow Meter: mouth-piece, disposable                   | 317 |
| Oropharyngeal airway (Guedel)                              | 318 |
| Plaster: self-adhesive, roll                               | 319 |
| Razor, disposable                                          | 320 |

|                                             |     |
|---------------------------------------------|-----|
| Sanitary towels: standard                   | 321 |
| Sheath: incontinence                        | 322 |
| Skin traction kit                           | 323 |
| Stockinette: 100mm, roll 25m                | 324 |
| Stockinette: 150mm, roll 25m                | 325 |
| Suture materials                            | 326 |
| Swab: 70% isopropyl alcohol                 | 327 |
| Syringe: hypodermic                         | 328 |
| Tampon: vaginal                             | 329 |
| Tape: surgical. Adhesive, microporous, 25mm | 330 |
| Tape: surgical. Adhesive, microporous, 50mm | 331 |
| Thermal blanket                             | 332 |
| Thermometer probe covers: disposable        | 333 |
| Tube: stomach washout                       | 334 |
| Ultrasound gel                              | 335 |
| Urinary catheters (Foley's)                 | 336 |

## POINT OF CARE TESTING 337

|                                                             |     |
|-------------------------------------------------------------|-----|
| Glucometer consumables                                      | 337 |
| Haemoglobinmeter consumables and accessories (older models) | 338 |
| Haemoglobinmeter consumables (newer models)                 | 339 |
| HIV test kit: rapid                                         | 340 |
| Lancets, Multipurpose                                       | 341 |
| Malaria Rapid Diagnostic test kit                           | 342 |
| Rhesus test kit                                             | 344 |
| Urine dip sticks                                            | 345 |

## OBSTETRIC 346

|                            |     |
|----------------------------|-----|
| Cord clamp: umbilical      | 346 |
| Sanitary towels: maternity | 347 |

## ORAL HEALTH 348

|                                |     |
|--------------------------------|-----|
| Acid etch                      | 348 |
| Amalgam capsule                | 349 |
| Anaesthetic: topical           | 350 |
| Apron: dental, plastic         | 351 |
| Articulating paper: thin, blue | 352 |
| Bib: plastic                   | 353 |
| Bonding agent: self-etch       | 354 |
| Brush: applicator              | 355 |
| Cement: zinc oxide and eugenol | 356 |
| Composites                     | 357 |
| Cotton wool pellets            | 358 |
| Dental floss: Waxed            | 359 |
| Dry socket alveolar paste      | 360 |
| Fissure sealants               | 361 |
| Fluoride trays                 | 362 |
| Fluoride gel                   | 363 |
| Glass ionomer                  | 364 |
| Haemostat sponge               | 365 |
| Paste: prophylaxis             | 366 |
| Polishing kit                  | 367 |
| Polishing strips               | 368 |
| Polyester strips (composite)   | 369 |
| Suture material: intra-oral    | 370 |

|                                      |     |
|--------------------------------------|-----|
| Tip: dental suction (saliva ejector) | 371 |
| Toothbrush                           | 372 |
| Toothpaste: dental, fluoride         | 373 |
| Varnish: cavity liner                | 374 |

## REHABILITATION 375

|                                                 |     |
|-------------------------------------------------|-----|
| Batteries: hearing aid                          | 375 |
| Bicarbonate of soda: sachets                    | 376 |
| Breadboard: one-handed                          | 377 |
| Cable ties: nylon,                              | 378 |
| Cardboard: A4, various colours                  | 379 |
| Coloured pencils, pens, crayons                 | 380 |
| Curette: cerumen, lighted                       | 381 |
| Cushion: wheelchair                             | 382 |
| Cushion covers: wheelchair                      | 383 |
| Ear mould impression material and scoop         | 384 |
| Ear mould impression Otolith: replacement globe | 385 |
| Ear mould impression Otolith: replacement tips  | 386 |
| Exercise band: latex                            | 387 |
| Feeding cup                                     | 388 |
| Feeding spoon                                   | 389 |
| Ferrule: rubber                                 | 390 |
| Foam: EVA                                       | 391 |
| Foam: high-density, 36/20                       | 392 |
| Foam: HD compressed 1300                        | 393 |
| Masonite                                        | 394 |
| Oil: arnica                                     | 395 |
| Otostops                                        | 396 |
| Paper: print-out, tympanometer                  | 397 |
| Pelvic straps                                   | 398 |
| Pressure garment material: elastonet            | 399 |
| Sewing kit                                      | 400 |
| Splinting material: thermoplastic sheets        | 401 |
| Splinting material: thermoplastic tape          | 402 |
| Towelling                                       | 403 |
| Varnish: wood                                   | 404 |
| Velcro: circle, self-adhesive                   | 405 |
| Velcro: loop, 5cm width, 50m roll               | 406 |
| Washboard: one-handed                           | 407 |
| Wheelchair spares kit                           | 408 |
| Wheelchair gloves                               | 409 |
| Wood                                            | 410 |

## STERILISATION 411

|                           |     |
|---------------------------|-----|
| Bowie-Dick test packs     | 411 |
| Helix test kit and strips | 412 |

## PERSONAL PROTECTION EQUIPMENT 413

|                                    |     |
|------------------------------------|-----|
| Aprons: disposable                 | 413 |
| Face shield                        | 414 |
| Gloves: sterile                    | 415 |
| Gloves: non-sterile                | 416 |
| Goggles                            | 417 |
| Gown: disposable                   | 418 |
| Particulate mask (N-95 respirator) | 419 |
| Surgical mask                      | 420 |

# Clinical stationery



## Appointment cards: general

| Catalogue Number | Item Name                  | Available on Transversal Contract | Contract Number or Code |
|------------------|----------------------------|-----------------------------------|-------------------------|
| PHC-C-016        | Appointment Cards: General | No                                |                         |

|                      |                                                                                                    |
|----------------------|----------------------------------------------------------------------------------------------------|
| Description          | Cards to register patient identifying data, and date and time of next appointment at the facility. |
| Use                  | Used for the implementation of the Patient Appointments system.                                    |
| Applicable Standards |                                                                                                    |
| Note to Procurement  |                                                                                                    |

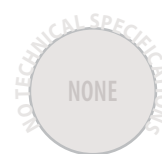

## Maternity health record

| Catalogue Number | Item Name               | Available on Transversal Contract | Contract Number or Code |
|------------------|-------------------------|-----------------------------------|-------------------------|
| PHC-C-017        | Maternity Health Record | No                                |                         |
|                  |                         |                                   |                         |

|                      |                                                                 |
|----------------------|-----------------------------------------------------------------|
| Description          |                                                                 |
| Use                  | Used to record the progress of a pregnancy and maternal health. |
| Applicable Standards |                                                                 |
| Note to Procurement  |                                                                 |

## Patient information register

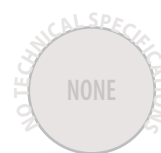

| Catalogue Number | Item Name                                  | Available on Transversal Contract | Contract Number or Code |
|------------------|--------------------------------------------|-----------------------------------|-------------------------|
| PHC-C-022        | Patient information register or tick sheet | No                                |                         |
|                  |                                            |                                   |                         |

|                      |  |
|----------------------|--|
| Description          |  |
| Use                  |  |
| Applicable Standards |  |
| Note to Procurement  |  |



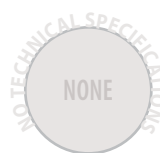

## Patient record for adults

| Catalogue Number | Item Name                 | Available on Transversal Contract | Contract Number or Code |
|------------------|---------------------------|-----------------------------------|-------------------------|
| PHC-C-020        | Patient record for adults | No                                |                         |

|                      |                                                              |
|----------------------|--------------------------------------------------------------|
| Description          | Document to record episodes of care.                         |
| Use                  | Used as part of the longitudinal health record, as per ICSM. |
| Applicable Standards |                                                              |
| Note to Procurement  |                                                              |

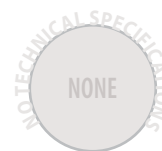

## Patient record for children

| Catalogue Number | Item Name                   | Available on Transversal Contract | Contract Number or Code |
|------------------|-----------------------------|-----------------------------------|-------------------------|
| PHC-C-021        | Patient record for children | No                                |                         |

|                      |                                                              |
|----------------------|--------------------------------------------------------------|
| Description          | Document to record episodes of care.                         |
| Use                  | Used as part of the longitudinal health record, as per ICSM. |
| Applicable Standards |                                                              |
| Note to Procurement  |                                                              |

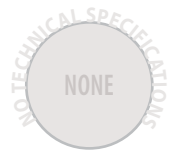

## Referral forms: general

| Catalogue Number | Item Name               | Available on Transversal Contract | Contract Number or Code |
|------------------|-------------------------|-----------------------------------|-------------------------|
| PHC-C-023        | Referral forms: general | No                                |                         |

|                      |                                                            |
|----------------------|------------------------------------------------------------|
| Description          | Pre-printed form for recording important information.      |
| Use                  | Used when a patient is referred to the next level of care. |
| Applicable Standards |                                                            |
| Note to Procurement  |                                                            |

## Referral forms: WBPHCOT



| Catalogue Number | Item Name               | Available on Transversal Contract | Contract Number or Code |
|------------------|-------------------------|-----------------------------------|-------------------------|
| PHC-C-024        | Referral forms: WBPHCOT | No                                |                         |
|                  |                         |                                   |                         |

|                      |                                                       |
|----------------------|-------------------------------------------------------|
| Description          | Pre-printed form for recording important information. |
| Use                  | Used when a patient is referred to the local WBPHCOT. |
| Applicable Standards |                                                       |
| Note to Procurement  |                                                       |

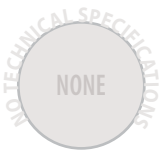

# Register: assets

| Catalogue Number | Item Name        | Available on Transversal Contract | Contract Number or Code |
|------------------|------------------|-----------------------------------|-------------------------|
| PHC-C-034        | Register: Assets | No                                |                         |
|                  |                  |                                   |                         |

|                      |                                                                                                              |
|----------------------|--------------------------------------------------------------------------------------------------------------|
| Description          | Register of Assets of the PHC Facility.                                                                      |
| Use                  | Keeping track of all non-consumable assets of the facility, including equipment, instruments, and furniture. |
| Applicable Standards | Format will depend on Provincial requirements.                                                               |
| Note to Procurement  |                                                                                                              |

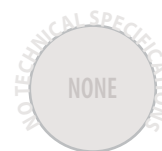

## Register: Daily reception headcount

| Catalogue Number | Item Name                           | Available on Transversal Contract | Contract Number or Code |
|------------------|-------------------------------------|-----------------------------------|-------------------------|
| PHC-C-030        | Register: Daily reception headcount | No                                |                         |

|                      |                                   |
|----------------------|-----------------------------------|
| Description          | Register maintained at reception. |
| Use                  | Record of daily attendances.      |
| Applicable Standards |                                   |
| Note to Procurement  |                                   |



## Register: Monthly tally summary

| Catalogue Number | Item Name                       | Available on Transversal Contract | Contract Number or Code |
|------------------|---------------------------------|-----------------------------------|-------------------------|
| PHC-C-031        | Register: Monthly tally summary | No                                |                         |

|                      |                                                     |
|----------------------|-----------------------------------------------------|
| Description          | Register of monthly summary statistics.             |
| Use                  | Monthly summary of statistics reported to District. |
| Applicable Standards |                                                     |
| Note to Procurement  |                                                     |

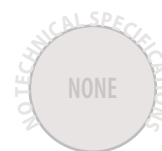

## Register : Patient safety incident

| Catalogue Number | Item Name                          | Available on Transversal Contract | Contract Number or Code |
|------------------|------------------------------------|-----------------------------------|-------------------------|
| PHC-C-033        | Register : Patient Safety Incident | No                                |                         |

|                      |                                                                                                                                                                                                                                                                                                                                       |
|----------------------|---------------------------------------------------------------------------------------------------------------------------------------------------------------------------------------------------------------------------------------------------------------------------------------------------------------------------------------|
| Description          | Register of Safety Incidents.                                                                                                                                                                                                                                                                                                         |
| Use                  | For recording of Patient Safety Incidents, in accordance with the Policy.<br>Incidents are categorised as SAC1, SAC2, or SAC3. The register provides for recording details of the incident, as well as internal investigations and outcomes.<br>SAC1 incidents must be reported within 24 hours to the District or Provincial office. |
| Applicable Standards | Final Draft National Policy to manage Patient Safety Incidents in South Africa 18 Dec 2015.                                                                                                                                                                                                                                           |
| Note to Procurement  |                                                                                                                                                                                                                                                                                                                                       |



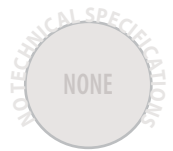

## Register: PHC comprehensive

| Catalogue Number | Item Name                   | Available on Transversal Contract | Contract Number or Code |
|------------------|-----------------------------|-----------------------------------|-------------------------|
| PHC-C-029        | Register: PHC comprehensive | No                                |                         |

|                      |                                  |
|----------------------|----------------------------------|
| Description          | Master record of PHC encounters. |
| Use                  |                                  |
| Applicable Standards |                                  |
| Note to Procurement  |                                  |

## Register: Weekly tally notepad

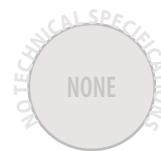

| Catalogue Number | Item Name                      | Available on Transversal Contract | Contract Number or Code |
|------------------|--------------------------------|-----------------------------------|-------------------------|
| PHC-C-032        | Register: Weekly tally notepad | No                                |                         |

|                      |                                                               |
|----------------------|---------------------------------------------------------------|
| Description          | Sheets for summary of weekly statistics.                      |
| Use                  | Summary of weekly statistics, to be used for Monthly summary. |
| Applicable Standards |                                                               |
| Note to Procurement  |                                                               |



## Road to Health Booklet for Boys

| Catalogue Number | Item Name                       | Available on Transversal Contract | Contract Number or Code |
|------------------|---------------------------------|-----------------------------------|-------------------------|
| PHC-C-018        | Road to Health Booklet for Boys | No                                |                         |

|                      |                                                                                |
|----------------------|--------------------------------------------------------------------------------|
| Description          | Document and chart to record growth, milestones, development and immunisation. |
| Use                  |                                                                                |
| Applicable Standards |                                                                                |
| Note to Procurement  |                                                                                |

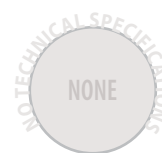

## Road to Health Booklet for Girls

| Catalogue Number | Item Name                        | Available on Transversal Contract | Contract Number or Code |
|------------------|----------------------------------|-----------------------------------|-------------------------|
| PHC-C-019        | Road to Health Booklet for Girls | No                                |                         |

|                      |                                                                                |
|----------------------|--------------------------------------------------------------------------------|
| Description          | Document and chart to record growth, milestones, development and immunisation. |
| Use                  |                                                                                |
| Applicable Standards |                                                                                |
| Note to Procurement  |                                                                                |

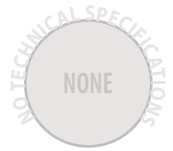

## Sick note

| Catalogue Number | Item Name | Available on Transversal Contract | Contract Number or Code |
|------------------|-----------|-----------------------------------|-------------------------|
| PHC-C-025        | Sick note | No                                |                         |

|                      |                                                                 |
|----------------------|-----------------------------------------------------------------|
| Description          | Official sick note.                                             |
| Use                  | Used to confirm absenteeism as result of illness or disability. |
| Applicable Standards |                                                                 |
| Note to Procurement  |                                                                 |



## Temperature recording forms

| Catalogue Number | Item Name                                | Available on Transversal Contract | Contract Number or Code |
|------------------|------------------------------------------|-----------------------------------|-------------------------|
| PHC-C-134        | Recording form: room temperature         | No                                |                         |
| PHC-C-135        | Recording form: refrigerator temperature | No                                |                         |

|                      |                                                                                                        |
|----------------------|--------------------------------------------------------------------------------------------------------|
| Description          | Forms to log daily temperatures.                                                                       |
| Use                  | Keep a log of temperature variations, where these may affect the stability of vaccines or medications. |
| Applicable Standards |                                                                                                        |
| Note to Procurement  |                                                                                                        |

# Surgical

## AED replacement Pads

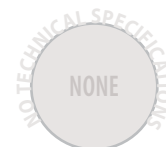

| Catalogue Number | Item Name                    | Available on Transversal Contract | Contract Number or Code |
|------------------|------------------------------|-----------------------------------|-------------------------|
| PHC-C-174        | Replacement pads: Adult      | RT 4                              | RT 4-05-075 ME          |
| PHC-C-175        | Replacement pads: Paediatric | RT 4                              | RT 4-05-076 ME          |

|                      |                                                                           |
|----------------------|---------------------------------------------------------------------------|
| Description          | Replacement pads for Automatic External Defibrillator.                    |
| Use                  | Foil-packed in sets of two. Adult and paediatric size. Discard after use. |
| Applicable Standards |                                                                           |
| Note to Procurement  | These items must be in series with RT 4-05-072-A-ME                       |

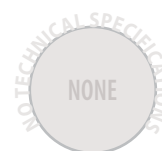

## Amniotomy hook

| Catalogue Number | Item Name                           | Available on Transversal Contract | Contract Number or Code |
|------------------|-------------------------------------|-----------------------------------|-------------------------|
| PHC-C-171        | Amniotomy hook, disposable, sterile | No                                |                         |

|                      |                                                                 |
|----------------------|-----------------------------------------------------------------|
| Description          | Smooth ABS plastic long-handled hook.                           |
| Use                  | For Artificial Rupture of Membranes, in non-progressing labour. |
| Applicable Standards | None available.                                                 |
| Note to Procurement  |                                                                 |



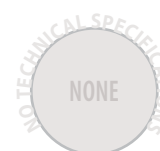

## Antibacterial filter: portable suction machine

| Catalogue Number | Item Name                                      | Available on Transversal Contract | Contract Number or Code |
|------------------|------------------------------------------------|-----------------------------------|-------------------------|
| PHC-C-162        | Antibacterial filter: portable suction machine | No                                |                         |

|                      |                                                                             |
|----------------------|-----------------------------------------------------------------------------|
| Description          | Filter to prevent liquid being aspirated into the vacuum pump mechanism.    |
| Use                  | Replace after each use.                                                     |
| Applicable Standards |                                                                             |
| Note to Procurement  | This item must be in series with RT 4-05-041 ME. Not currently on contract. |



## Antibacterial filter: trolley suction

| Catalogue Number | Item Name                             | Available on Transversal Contract | Contract Number or Code |
|------------------|---------------------------------------|-----------------------------------|-------------------------|
| PHC-C-161        | Antibacterial filter: trolley suction | RT 2-2016                         | 42171803-00001          |

|                      |                                                                          |
|----------------------|--------------------------------------------------------------------------|
| Description          | Filter to prevent liquid being aspirated into the vacuum pump mechanism. |
| Use                  | Replace after each use.                                                  |
| Applicable Standards |                                                                          |
| Note to Procurement  | This item must be in series with 42171801-00001.                         |

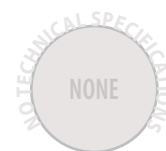

## Bandage: crepe

| Catalogue Number | Item Name      | Available on Transversal Contract | Contract Number or Code |
|------------------|----------------|-----------------------------------|-------------------------|
| PHC-C-147        | Bandage: crepe | RT 42-2018                        | 42311505-00031          |

|                      |                                                                |
|----------------------|----------------------------------------------------------------|
| Description          | Woven cotton bandage. Roll.<br>100mm by 4,5m stretched length. |
| Use                  | Light compression over dressing.                               |
| Applicable Standards | SANS 945-1.                                                    |
| Note to Procurement  |                                                                |

## Blade: scalpel

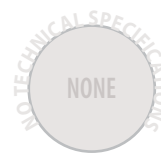

| Catalogue Number | Item Name                       | Available on Transversal Contract | Contract Number or Code |
|------------------|---------------------------------|-----------------------------------|-------------------------|
| PHC-C-144        | Blade: scalpel, No 10, sterile  | RT 252                            | RT 252-01-005 ME        |
| PHC-C-333        | Blade: scalpel, No. 11, sterile | RT252                             | RT252-01-006ME          |
| PHC-C-334        | Blade: scalpel, No. 12, sterile | RT252                             | RT252-01-007ME          |

|                      |                                                                                                                                                                                                                                                                                                                                                              |                                                                                     |
|----------------------|--------------------------------------------------------------------------------------------------------------------------------------------------------------------------------------------------------------------------------------------------------------------------------------------------------------------------------------------------------------|-------------------------------------------------------------------------------------|
| Description          | Full-bellied single-use scalpel blade.                                                                                                                                                                                                                                                                                                                       |  |
| Use                  | Used with No 3 handle, for incisions and drainage procedures. Individually packed in sterile peel-pack. Supplied in packs/boxes.                                                                                                                                                                                                                             |                                                                                     |
| Applicable Standards | Material: ISO 7153-1.<br>Dimensions: ISO 7740:1985.                                                                                                                                                                                                                                                                                                          |                                                                                     |
| Note to Procurement  | <p>Ensure compatibility with scalpel handle RT 252-01-015 ME.</p> <p>For the No.12 blade, model 12D (sharpening bevel on both sides) is preferred for Oral health, therefore it should be the standard model procured.</p> <p>Note that future requirement may be for single-use, disposable retractable-blade scalpel. Enquire before next procurement.</p> |                                                                                     |

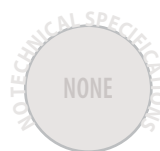

## Blade: stitch-cutter

| Catalogue Number | Item Name            | Available on Transversal Contract | Contract Number or Code |
|------------------|----------------------|-----------------------------------|-------------------------|
| PHC-C-145        | Blade: stitch-cutter | RT 252                            | RT 252-01-028 ME        |

|                      |                                                                                                  |                                                                                    |
|----------------------|--------------------------------------------------------------------------------------------------|------------------------------------------------------------------------------------|
| Description          | Long-body stainless steel blade with curved cutting edge at one end.                             |  |
| Use                  | For cutting stitches while maintaining aseptic technique. Does not need or fit a scalpel handle. |                                                                                    |
| Applicable Standards | Material: ISO 7153-1.                                                                            |                                                                                    |
| Note to Procurement  | Ensure stainless steel (some models are available in carbon steel).                              |                                                                                    |

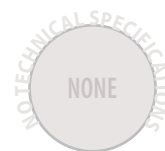

## Catheter: intrathoracic, silicon

| Catalogue Number | Item Name                              | Available on Transversal Contract | Contract Number or Code |
|------------------|----------------------------------------|-----------------------------------|-------------------------|
| PHC-C-364        | Catheter: intrathoracic, silicon s 120 | No                                |                         |
| PHC-C-365        | Catheter: intrathoracic, silicon s 124 | No                                |                         |
| PHC-C-366        | Catheter: intrathoracic, silicon s 128 | No                                |                         |
| PHC-C-367        | Catheter: intrathoracic, silicon s 130 | No                                |                         |
| PHC-C-368        | Catheter: intrathoracic, silicon s 132 | No                                |                         |

|                      |                                                           |
|----------------------|-----------------------------------------------------------|
| Description          | Sterile single-use catheters for intrathoracic insertion. |
| Use                  | Drainage of haemo-pneumothorax.                           |
| Applicable Standards | ISO 20697.                                                |
| Note to Procurement  |                                                           |

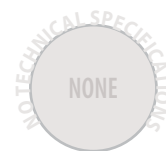

## Catheter: suction

| Catalogue Number | Item Name              | Available on Transversal Contract | Contract Number or Code |
|------------------|------------------------|-----------------------------------|-------------------------|
| PHC-C-359        | Catheter: suction, 6F  | No                                |                         |
| PHC-C-360        | Catheter: suction, 8F  | No                                |                         |
| PHC-C-361        | Catheter: suction, 10F | No                                |                         |
| PHC-C-362        | Catheter: suction, 12F | No                                |                         |
| PHC-C-363        | Catheter: suction, 14F | No                                |                         |

|                      |                                                               |
|----------------------|---------------------------------------------------------------|
| Description          | Sterile single use suction catheters.                         |
| Use                  | Suction of bodily fluids during resuscitation and procedures. |
| Applicable Standards | ISO 8836:2014.                                                |
| Note to Procurement  |                                                               |



## Cotton wool: balls 1g (500s)

| Catalogue Number | Item Name                    | Available on Transversal Contract | Contract Number or Code |
|------------------|------------------------------|-----------------------------------|-------------------------|
| PHC-C-148        | Cotton wool: balls 1g (500s) | RT 42-2018                        | 42311505-00049          |

|                      |                                                                                                |
|----------------------|------------------------------------------------------------------------------------------------|
| Description          | Cotton wool, absorbent balls, type 2, non-sterile, autoclavable, 500g package Size: Medium 1g. |
| Use                  | Swabbing and cleaning.                                                                         |
| Applicable Standards | Latest issue of SANS 149 Compliance certificate to be submitted with bid.                      |
| Note to Procurement  |                                                                                                |



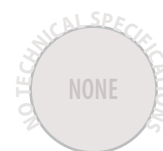

## Drainage system: chest, underwater, adult

| Catalogue Number | Item Name                                 | Available on Transversal Contract | Contract Number or Code |
|------------------|-------------------------------------------|-----------------------------------|-------------------------|
| PHC-C-369        | Drainage system: chest, underwater, adult | No                                |                         |

|                      |                                                                                                                                                                                                                                                                                                                             |
|----------------------|-----------------------------------------------------------------------------------------------------------------------------------------------------------------------------------------------------------------------------------------------------------------------------------------------------------------------------|
| Description          | A device consisting of a clear drainage bottle, with a graduated scale to measure volume drained; a locking, non-leak cap, with an inlet and outlet. The bottle is partly-filled with water when in use. A replaceable silicon tube is provided to connect the system to an intrathoracic catheter. Sterilised, single use. |
| Use                  | For providing an underwater seal to an intrathoracic drain. The inlet is below the level of the water in the bottle, hence the system acts as a one-way valve for air or fluid in the intrapleural space.                                                                                                                   |
| Applicable Standards |                                                                                                                                                                                                                                                                                                                             |
| Note to Procurement  |                                                                                                                                                                                                                                                                                                                             |

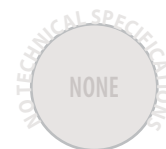

## Dressing pack: disposable

| Catalogue Number | Item Name                 | Available on Transversal Contract | Contract Number or Code |
|------------------|---------------------------|-----------------------------------|-------------------------|
| PHC-C-149        | Dressing pack: disposable | RT 42-2018                        | 42311505-00307          |

|                      |                                                                                                                                                                                                                                                                                                                                                                                                                             |
|----------------------|-----------------------------------------------------------------------------------------------------------------------------------------------------------------------------------------------------------------------------------------------------------------------------------------------------------------------------------------------------------------------------------------------------------------------------|
| Description          | <p>Dressing Pack: Surgical: Sterile Peel Packed.</p> <p>Contents:</p> <ul style="list-style-type: none"> <li>Gauze plain: <math>\pm 100\text{mm} \times 100\text{mm}</math>; Ten</li> <li>Gloves Non powdered, latex free, medium</li> <li>Cleansing swabs 30mm 1 bundle of 5 balls/ or 5 cotton wool balls</li> <li>Red plastic bag X 1</li> <li>Disposable soft drape 90 x 90cm 2 sheets</li> <li>Forceps x 2.</li> </ul> |
| Use                  | Wound dressing.                                                                                                                                                                                                                                                                                                                                                                                                             |
| Applicable Standards | SANS 446.                                                                                                                                                                                                                                                                                                                                                                                                                   |
| Note to Procurement  |                                                                                                                                                                                                                                                                                                                                                                                                                             |

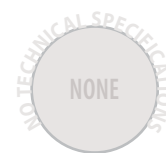

## ECG electrodes: disposable, self-adhesive, for resting ECG

| Catalogue Number | Item Name                                                  | Available on Transversal Contract | Contract Number or Code |
|------------------|------------------------------------------------------------|-----------------------------------|-------------------------|
| PHC-C-212        | ECG electrodes: disposable, self-adhesive, for resting ECG | No                                |                         |

|                      |                                                                                                                                                                                                |
|----------------------|------------------------------------------------------------------------------------------------------------------------------------------------------------------------------------------------|
| Description          | Peel-and-stick, self-adhesive electrodes. Pre-loaded with conductive gel.                                                                                                                      |
| Use                  | Applied to patient's chest and extremities, according to the chosen lead configuration. Each electrode has a built-in snap-on connector, to which the leads from the cardiograph are attached. |
| Applicable Standards |                                                                                                                                                                                                |
| Note to Procurement  | Procured in boxes of 50 or 100. Not suitable for stress or exercise ECGs.                                                                                                                      |

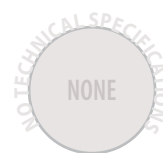

## Endotracheal tubes: cuffed

| Catalogue Number | Item Name                        | Available on Transversal Contract | Contract Number or Code |
|------------------|----------------------------------|-----------------------------------|-------------------------|
| PHC-C-357        | Endotracheal tube: cuffed size 3 | RT 13                             | RT13-25-001             |
| PHC-C-358        | Endotracheal tube: cuffed size 4 | RT 13                             | RT13-25-003             |
| PHC-C-089        | Endotracheal tube: cuffed size 5 | RT 13                             | RT 13-25-005            |
| PHC-C-090        | Endotracheal tube: cuffed size 6 | RT 13                             | RT 13-25- 007           |
| PHC-C-091        | Endotracheal tube: cuffed size 7 | RT 13                             | RT 13-25- 009           |
| PHC-C-092        | Endotracheal tube: cuffed size 8 | RT 13                             | RT 13-25-010            |

|                      |                                                                                                                                                   |
|----------------------|---------------------------------------------------------------------------------------------------------------------------------------------------|
| Description          | Cuffed endotracheal tube, PVC reinforced with metal spiral. Atraumatic, non-kinking. 15mm outer diameter connector. Individual sterile peel pack. |
| Use                  | Securing of airway for ventilation purposes, usually in larger children or adults. Inflatable cuff ensures seal inside trachea.                   |
| Applicable Standards | ISO 5361:2016.                                                                                                                                    |
| Note to Procurement  |                                                                                                                                                   |



## Endotracheal tubes: uncuffed

| Catalogue Number | Item Name                                        | Available on Transversal Contract | Contract Number or Code |
|------------------|--------------------------------------------------|-----------------------------------|-------------------------|
| PHC-C-086        | Endotracheal tube: uncuffed 2,0mm inner diameter | RT 13                             | RT13-22-001             |
| PHC-C-354        | Endotracheal tube: uncuffed 2,5mm inner diameter | RT 13                             | RT13-22-002             |
| PHC-C-087        | Endotracheal tube: uncuffed 3,0mm inner diameter | RT 13                             | RT 13-22-003            |
| PHC-C-355        | Endotracheal tube: uncuffed 3,5mm inner diameter | RT 13                             | RT13-22-004             |
| PHC-C-088        | Endotracheal tube: uncuffed 4,0mm inner diameter | RT 13                             | RT 13-22-005            |
| PHC-C-356        | Endotracheal tube: uncuffed 4,5mm inner diameter | RT 13                             | RT13-22-005             |

|                      |                                                                                                                                                     |
|----------------------|-----------------------------------------------------------------------------------------------------------------------------------------------------|
| Description          | Uncuffed endotracheal tube, PVC reinforced with metal spiral. Atraumatic, non-kinking. 15mm outer diameter connector. Individual sterile peel pack. |
| Use                  | Securing of airway for ventilation purposes, usually in paediatric patients.                                                                        |
| Applicable Standards | ISO 5361:2016.                                                                                                                                      |
| Note to Procurement  |                                                                                                                                                     |

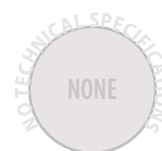

## Eye patch: disposable

| Catalogue Number | Item Name             | Available on Transversal Contract | Contract Number or Code |
|------------------|-----------------------|-----------------------------------|-------------------------|
| PHC-C-165        | Eye patch: disposable | No                                |                         |

|                      |                                                                 |
|----------------------|-----------------------------------------------------------------|
| Description          | Disposable plastic eye patch, with adjustable elastic headband. |
| Use                  | For occlusion of eye during after injury or treatment.          |
| Applicable Standards |                                                                 |
| Note to Procurement  |                                                                 |

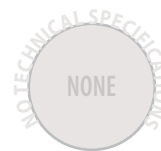

## Gauze: absorbent, Type 1, sterile, peel pack (5 swabs)

| Catalogue Number | Item Name                                              | Available on Transversal Contract | Contract Number or Code |
|------------------|--------------------------------------------------------|-----------------------------------|-------------------------|
| PHC-C-150        | Gauze: absorbent, Type 1, sterile, peel pack (5 swabs) | RT 42-2018                        | 42311505-00070          |

|                      |                                                                                                                                 |
|----------------------|---------------------------------------------------------------------------------------------------------------------------------|
| Description          | Swabs, gauze, absorbent, type 1, bleached, sterile X-Ray detectable, 12 ply, 1 x 5 swabs Size: 100mm x 100mm Sterile peel pack. |
| Use                  | Wound and burn cleaning and dressing.                                                                                           |
| Applicable Standards | SANS 446.                                                                                                                       |
| Note to Procurement  |                                                                                                                                 |

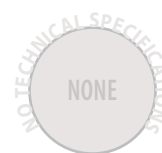

## Gauze: paraffin, 100X100 (box of 10)

| Catalogue Number | Item Name                            | Available on Transversal Contract | Contract Number or Code |
|------------------|--------------------------------------|-----------------------------------|-------------------------|
| PHC-C-152        | Gauze: paraffin, 100X100 (box of 10) | RT 42-2018                        | 42311505-00101          |

|                      |                                                                                                                                                  |
|----------------------|--------------------------------------------------------------------------------------------------------------------------------------------------|
| Description          | Dressing, paraffin gauze, B.P., 10 dressings Size: 100mmx100mm Sterile individually peel packed Box.                                             |
| Use                  | Burns and skin graft dressing.                                                                                                                   |
| Applicable Standards | British Pharmacopoeia standard for Paraffin Gauze Dressing (Tulle Gras). Proof must be submitted.<br>MCC product registration must be submitted. |
| Note to Procurement  |                                                                                                                                                  |



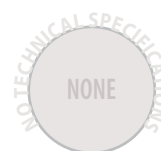

## Gauze: swabs, plain

| Catalogue Number | Item Name                                      | Available on Transversal Contract | Contract Number or Code |
|------------------|------------------------------------------------|-----------------------------------|-------------------------|
| PHC-C-151        | Gauze: swabs plain, 100x100X8ply (pack of 100) | RT 42-2018                        | 42311505-00063          |

|                      |                                                                                              |
|----------------------|----------------------------------------------------------------------------------------------|
| Description          | Swabs, gauze, absorbent, type 3, bleached, 8 ply, 100 swabs Size: 100mm x 100mm Non sterile. |
| Use                  | Wound cleaning.                                                                              |
| Applicable Standards | SANS 446.                                                                                    |
| Note to Procurement  |                                                                                              |

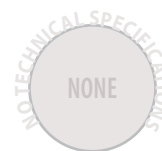

## Intravenous administration set

| Catalogue Number | Item Name                                  | Available on Transversal Contract | Contract Number or Code |
|------------------|--------------------------------------------|-----------------------------------|-------------------------|
| PHC-C-095        | Intravenous administration set 20 drops/ml | No                                |                         |
| PHC-C-096        | Intravenous administration set 60 drops/ml | No                                |                         |

|                      |                                                                                                                                                                                                                                                                                                         |                                                                                      |
|----------------------|---------------------------------------------------------------------------------------------------------------------------------------------------------------------------------------------------------------------------------------------------------------------------------------------------------|--------------------------------------------------------------------------------------|
| Description          | <p>Set with pointed cannula for insertion into container of intravenous fluid, drip chamber (with regulated drop pipette), 1,8m clear flexible tubing terminating in Luer lock male adapter. Flow-regulating clamp. Y-injection site. Sterile fluid path. Packed in sterile tamper-proof peel pack.</p> |  |
| Use                  | <p>For intravenous therapy with fluids alone, or fluids and medication.</p> <p>Adult set: 20 drops per ml.</p> <p>Paediatric set: 60 drops per ml.</p>                                                                                                                                                  |                                                                                      |
| Applicable Standards | SANS 1775-1:2011.                                                                                                                                                                                                                                                                                       |                                                                                      |
| Note to Procurement  |                                                                                                                                                                                                                                                                                                         |                                                                                      |

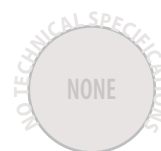

## Intravenous cannula

| Catalogue Number | Item Name                       | Available on Transversal Contract | Contract Number or Code |
|------------------|---------------------------------|-----------------------------------|-------------------------|
| PHC-C-097        | Intravenous cannula: 18g green  | No                                |                         |
| PHC-C-098        | Intravenous cannula: 20g pink   | No                                |                         |
| PHC-C-099        | Intravenous cannula: 22g blue   | No                                |                         |
| PHC-C-100        | Intravenous cannula: 24g yellow | No                                |                         |

|                      |                                                                                     |                                                                                      |
|----------------------|-------------------------------------------------------------------------------------|--------------------------------------------------------------------------------------|
| Description          | Intravenous cannula with stylet, in various sizes.<br>Individual sterile peel pack. |  |
| Use                  | To establish secure access to a vein, for intravenous infusion or therapy.          |                                                                                      |
| Applicable Standards | SANS 327: 201.                                                                      |                                                                                      |
| Note to Procurement  |                                                                                     |                                                                                      |

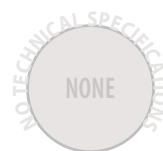

## Intravenous cannula: winged

| Catalogue Number | Item Name                   | Available on Transversal Contract | Contract Number or Code |
|------------------|-----------------------------|-----------------------------------|-------------------------|
| PHC-C-198        | Intravenous cannula: winged | No                                |                         |

|                      |                                                                                                                          |
|----------------------|--------------------------------------------------------------------------------------------------------------------------|
| Description          | "Butterfly" cannula, with attached plastic wings for fixation. Female Luer-type port. Individually packed. Sterile. 22g. |
| Use                  | Primarily used for scalp vein access in very small children.                                                             |
| Applicable Standards | SANS 305 :2011.                                                                                                          |
| Note to Procurement  |                                                                                                                          |

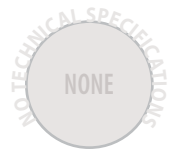

## Lubricant gel, sterile

| Catalogue Number | Item Name              | Available on Transversal Contract | Contract Number or Code |
|------------------|------------------------|-----------------------------------|-------------------------|
| PHC-C-172        | Lubricant gel, sterile | No                                |                         |

|                     |                                                                           |
|---------------------|---------------------------------------------------------------------------|
| Description         | Aqueous gel in tubes or sterile peel packs.                               |
| Use                 | For examinations or instrument insertions, where lubrication is required. |
| Note to Procurement |                                                                           |

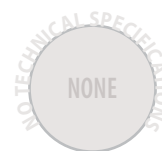

## Mask: laryngeal, adult

| Catalogue Number | Item Name                                | Available on Transversal Contract | Contract Number or Code |
|------------------|------------------------------------------|-----------------------------------|-------------------------|
| PHC-C-103        | Laryngeal mask: adult (50-90kg) size 4.0 | RT 13                             | RT 13-15-006            |
| PHC-C-104        | Laryngeal mask: adult (90+ kg) size 5.0  | RT 13                             | RT 13-15-007            |
| PHC-C-351        | Laryngeal mask: size 2                   | RT 13                             | RT13-11-003             |
| PHC-C-352        | Laryngeal mask: size 2,5                 | RT 13                             | RT13-11-004             |
| PHC-C-353        | Laryngeal mask: size 3                   | RT 13                             | RT13-11-005             |

|                      |                                                                                                                                                                            |                                                                                      |
|----------------------|----------------------------------------------------------------------------------------------------------------------------------------------------------------------------|--------------------------------------------------------------------------------------|
| Description          | <p>Second generation supraglottic airway Soft, gel-like, non-inflatable cuff, anatomical design.</p> <p>Two sizes: for smaller and larger adults.</p>                      |  |
| Use                  | <p>Has been shown to be easier to use by first responders, does not traumatise the vocal cords. Works by sealing the supraglottic area. No inflation of cuff required.</p> |                                                                                      |
| Applicable Standards | ISO 11712:2009.                                                                                                                                                            |                                                                                      |
| Note to Procurement  |                                                                                                                                                                            |                                                                                      |

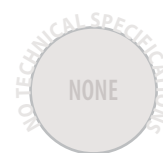

## Mask: oxygen, diluter type

| Catalogue Number | Item Name                                     | Available on Transversal Contract | Contract Number or Code |
|------------------|-----------------------------------------------|-----------------------------------|-------------------------|
| PHC-C-107        | Mask: oxygen (diluter type)<br>Paediatric 24% | RT 13                             | RT 13-41-001            |
| PHC-C-108        | Mask: oxygen (diluter type)<br>Adult 24%      | RT 13                             | RT 13-42-001            |
| PHC-C-109        | Humidifier pre-filled water pack              | RT 13                             | RT 13-48-002            |

|                      |                                                                                                                                                                  |                                                                                      |
|----------------------|------------------------------------------------------------------------------------------------------------------------------------------------------------------|--------------------------------------------------------------------------------------|
| Description          | Oxygen delivery mask with venturi that regulates the delivered oxygen concentration.                                                                             |  |
| Use                  | For oxygen delivery to patient who is breathing spontaneously. A pre-filled water pack can be connected in line with the diluter masks, to moisten inspired air. |                                                                                      |
| Applicable Standards | ISO 11712:2009.                                                                                                                                                  |                                                                                      |
| Note to Procurement  |                                                                                                                                                                  |                                                                                      |

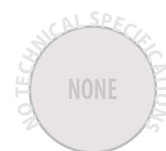

## Mask: oxygen, re-breathing type

| Catalogue Number | Item Name                                      | Available on Transversal Contract | Contract Number or Code |
|------------------|------------------------------------------------|-----------------------------------|-------------------------|
| PHC-C-105        | Mask: oxygen (re-breathing type)<br>Paediatric | RT 13                             | RT 13-43-001            |
| PHC-C-106        | Mask: oxygen (re-breathing type)<br>Adult      | RT 13                             | RT 13-43-002            |

|                      |                                                                |                                                                                     |
|----------------------|----------------------------------------------------------------|-------------------------------------------------------------------------------------|
| Description          | Oxygen delivery mask with under-chin re-breathing bag.         |  |
| Use                  | For oxygen delivery to patient who is breathing spontaneously. |                                                                                     |
| Applicable Standards | ISO 11712:2009.                                                |                                                                                     |
| Note to Procurement  |                                                                |                                                                                     |





## Nasal Cannula: oxygen

| Catalogue Number | Item Name                         | Available on Transversal Contract | Contract Number or Code |
|------------------|-----------------------------------|-----------------------------------|-------------------------|
| PHC-C-110        | Nasal cannula: oxygen, paediatric | RT 13                             | RT 13-45-004            |
| PHC-C-111        | Nasal cannula: oxygen, adult      | RT 13                             | RT 13-43-005            |
| PHC-C-112        | Humidifier pre-filled water pack  | RT 13                             | RT 13-48-002            |

|                      |                                                                                                                                                                                                                                                                      |                                                                                     |
|----------------------|----------------------------------------------------------------------------------------------------------------------------------------------------------------------------------------------------------------------------------------------------------------------|-------------------------------------------------------------------------------------|
| Description          | Oxygen delivery nasal cannula.                                                                                                                                                                                                                                       |  |
| Use                  | <p>For oxygen delivery to patient who is breathing spontaneously.</p> <p>Over-the-ear style nasal cannula.</p> <p>Retaining strap.</p> <p>2 m. crush-proof tubing.</p> <p>Can be used with pre-filled water pack to supply humidification during oxygen therapy.</p> |                                                                                     |
| Applicable Standards | ISO/DIS 17256 (when it comes into force).                                                                                                                                                                                                                            |                                                                                     |
| Note to Procurement  |                                                                                                                                                                                                                                                                      |                                                                                     |

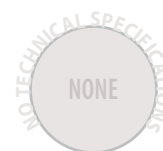

# Nasogastric catheter

| Catalogue Number | Item Name                     | Available on Transversal Contract | Contract Number or Code       |
|------------------|-------------------------------|-----------------------------------|-------------------------------|
| PHC-C-130        | Nasogastric tube: 600mm F 8   | No                                | Nasogastric tube, 600mm FG 8  |
| PHC-C-131        | Nasogastric tube: 1000mm F 10 | No                                | Nasogastric tube, 1000mm FG10 |
| PHC-C-132        | Nasogastric tube: 1000mm F 12 | No                                | Nasogastric tube, 1000mm FG12 |
| PHC-C-342        | Nasogastric tube: 600mm F 5   | No                                |                               |

|                      |                                                                                                                                                                       |                                                                                      |
|----------------------|-----------------------------------------------------------------------------------------------------------------------------------------------------------------------|--------------------------------------------------------------------------------------|
| Description          | Smooth PVC catheter, with round insertion end, funnel- shaped proximal end.<br>Sterile peel pack.                                                                     |  |
| Use                  | For draining the gastric system in obstruction, or direct feeding when patient cannot swallow.<br>Verify correct placement in stomach prior to any feeding or lavage. |                                                                                      |
| Applicable Standards |                                                                                                                                                                       |                                                                                      |
| Note to Procurement  |                                                                                                                                                                       |                                                                                      |

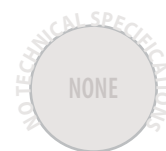

## Needles: hypodermic

| Catalogue Number | Item Name                     | Available on Transversal Contract | Contract Number or Code |
|------------------|-------------------------------|-----------------------------------|-------------------------|
| PHC-C-122        | Needle: hypodermic 18g pink   | No                                |                         |
| PHC-C-123        | Needle: hypodermic 20g yellow | No                                |                         |
| PHC-C-124        | Needle, hypodermic 21g green  | No                                |                         |
| PHC-C-125        | Needle: hypodermic 22g black  | No                                |                         |
| PHC-C-126        | Needle: hypodermic 23g blue   | No                                |                         |

|                      |                                                                                                                |                                                                                      |
|----------------------|----------------------------------------------------------------------------------------------------------------|--------------------------------------------------------------------------------------|
| Description          | Needle, hypodermic, for administering parenteral therapy.                                                      |  |
| Use                  | Long-point needle with plastic Luer-lock hub, colour-coded according to size.<br>Individual sterile peel pack. |                                                                                      |
| Applicable Standards | SANS1124-1:2011.                                                                                               |                                                                                      |
| Note to Procurement  |                                                                                                                |                                                                                      |

## Needles: Hypodermic, Dental

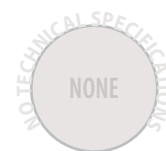

| Catalogue Number | Item Name                     | Available on Transversal Contract | Contract Number or Code |
|------------------|-------------------------------|-----------------------------------|-------------------------|
| PHC-C-176        | Needle: hypodermic, 30g short | RT296-2015                        | RT296-01-001            |
| PHC-C-177        | Needle: hypodermic, 27g long  | RT296-2015                        | RT296-01-002            |
|                  |                               |                                   |                         |

|                      |                                                                                                                                                                                                                                                 |
|----------------------|-------------------------------------------------------------------------------------------------------------------------------------------------------------------------------------------------------------------------------------------------|
| Description          | Needle, hypodermic: disposable, silicone coated, plastic hub with universal thread, sterile.<br>30g short: 0,3 x 25 mm, 30 gauge short, Lancet bevel point, Box of 100.<br>27g long: 0,4 x38 mm, 27 gauge long, Lancet bevel point, Box of 100. |
| Use                  | Administration of local anaesthetic.                                                                                                                                                                                                            |
| Applicable Standards | SANS 1188:1978.                                                                                                                                                                                                                                 |
| Note to Procurement  |                                                                                                                                                                                                                                                 |

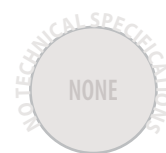

## Padding: cast orthopaedic

| Catalogue Number | Item Name                       | Available on Transversal Contract | Contract Number or Code |
|------------------|---------------------------------|-----------------------------------|-------------------------|
| PHC-C-378        | Padding: cast orthopaedic 50mm  | RT 42/HM02 2015BD                 | 45.01                   |
| PHC-C-379        | Padding: cast orthopaedic 100mm | RT 42/HM02 2015BD                 | 45.03                   |
| PHC-C-380        | Padding: cast orthopaedic 150mm | RT 42/HM02 2015BD                 | 45.04                   |

|                      |                                                               |
|----------------------|---------------------------------------------------------------|
| Description          | Natural bonded type orthopaedic padding, type 2. In 3m rolls. |
| Use                  | Used as padding before application of a cast or splint.       |
| Applicable Standards | SANS 196.                                                     |
| Note to Procurement  |                                                               |

## Plaster of Paris bandage

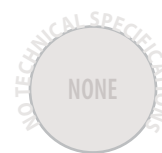

| Catalogue Number | Item Name                             | Available on Transversal Contract | Contract Number or Code |
|------------------|---------------------------------------|-----------------------------------|-------------------------|
| PHC-C-381        | Plaster of Paris bandage 100mm x 3,5m | RT 42/HM02 2015BD                 | 12.03                   |
| PHC-C-382        | Plaster of Paris bandage 150mm x 3,5m | RT 42/HM02 2015BD                 | 12.04                   |
| PHC-C-383        | Plaster of Paris bandage 100mm        | RT 42/HM02 2015BD                 | 12.05                   |

|                      |                                                                                                                                                  |
|----------------------|--------------------------------------------------------------------------------------------------------------------------------------------------|
| Description          | Leno weave base cloth Type 1, impregnated with anhydrous calcium sulphate hemihydrate. Individually packed in sealed, moisture-proof containers. |
| Use                  | Soaked in water, applied as a splint or cast, and allowed to dry and harden.                                                                     |
| Applicable Standards | SANS 1308.                                                                                                                                       |
| Note to Procurement  |                                                                                                                                                  |

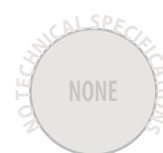

## Peak Flow Meter: mouth-piece, disposable

| Catalogue Number | Item Name                                | Available on Transversal Contract | Contract Number or Code |
|------------------|------------------------------------------|-----------------------------------|-------------------------|
| PHC-C-341        | Peak Flow Meter: mouth-piece, disposable | No                                |                         |

|                      |                                                                                              |
|----------------------|----------------------------------------------------------------------------------------------|
| Description          | Non-plastic tube (waxed card) which is inserted into mouth-piece end of the Peak Flow Meter. |
| Use                  | To prevent direct contact between mouth and instrument in a multi-patient environment.       |
| Applicable Standards |                                                                                              |
| Note to Procurement  | Must fit PHC-F-267 – not interchangeable.                                                    |



## Oropharyngeal airway (Guedel)

| Catalogue Number | Item Name                             | Available on Transversal Contract | Contract Number or Code |
|------------------|---------------------------------------|-----------------------------------|-------------------------|
| PHC-C-113        | Oropharyngeal airway (Guedel): size 0 | RT 13                             | RT 13-1-005             |
| PHC-C-114        | Oropharyngeal airway (Guedel): size 1 | RT 13                             | RT 13-1-06              |
| PHC-C-115        | Oropharyngeal airway (Guedel): size 2 | RT 13                             | RT 13-1-007             |
| PHC-C-116        | Oropharyngeal airway (Guedel): size 3 | RT 13                             | RT 13-1-008             |
| PHC-C-117        | Oropharyngeal airway (Guedel): size 4 | RT 13                             | RT 13-1-009             |
| PHC-C-350        | Oropharyngeal airway(Guedel): size 5  | RT 13                             | RT 13-1-010             |

|                      |                                                                                                                                            |                                                                                      |
|----------------------|--------------------------------------------------------------------------------------------------------------------------------------------|--------------------------------------------------------------------------------------|
| Description          | Oropharyngeal airway, used to keep airway open, when intubation is not necessary or practical.                                             |  |
| Use                  | Anatomically-curved plastic airway. Rigid bite block. Flanged. Surgically clean. Re-usable. Clean after use to surgically clean standards. |                                                                                      |
| Applicable Standards | ISO 5346:2016.                                                                                                                             |                                                                                      |
| Note to Procurement  |                                                                                                                                            |                                                                                      |



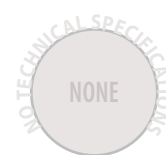

## Plaster: self-adhesive, roll

| Catalogue Number | Item Name                    | Available on Transversal Contract | Contract Number or Code |
|------------------|------------------------------|-----------------------------------|-------------------------|
| PHC-C-153        | Plaster: self-adhesive, roll | RT 42-2018                        | 42311707-00010          |

|                      |                                                                                                                         |
|----------------------|-------------------------------------------------------------------------------------------------------------------------|
| Description          | Tape, zinc oxide, surgical, adhesive, B.P., woven cotton cloth, non-stretch Size: 75mm x 5 m individually wrapped roll. |
| Use                  | Firm compression over dressings.<br>Wound protection.                                                                   |
| Applicable Standards | British Pharmacopoeia standard for Zinc Oxide Surgical Adhesive Tape. Proof must be submitted.                          |
| Note to Procurement  |                                                                                                                         |

## Razor, disposable



| Catalogue Number | Item Name         | Available on Transversal Contract | Contract Number or Code |
|------------------|-------------------|-----------------------------------|-------------------------|
| PHC-C-166        | Razor, disposable | No                                |                         |
|                  |                   |                                   |                         |

|                      |                                                           |
|----------------------|-----------------------------------------------------------|
| Description          | Disposable single-blade razor.                            |
| Use                  | For removal of hair prior to procedure or wound suturing. |
| Applicable Standards | None available.                                           |
| Note to Procurement  |                                                           |

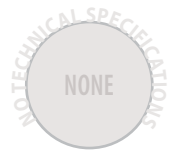

## Sanitary towels: standard

| Catalogue Number | Item Name                 | Available on Transversal Contract | Contract Number or Code |
|------------------|---------------------------|-----------------------------------|-------------------------|
| PHC-C-157        | Sanitary towels: standard | No                                |                         |

|                      |                                     |
|----------------------|-------------------------------------|
| Description          | Normal usage sanitary towels. Pack. |
| Use                  |                                     |
| Applicable Standards |                                     |
| Note to Procurement  |                                     |

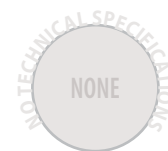

## Sheath: incontinence

| Catalogue Number | Item Name                 | Available on Transversal Contract | Contract Number or Code |
|------------------|---------------------------|-----------------------------------|-------------------------|
| PHC-C-373        | Sheath: incontinence 25mm | No                                |                         |
| PHC-C-374        | Sheath: incontinence 30mm | No                                |                         |
| PHC-C-375        | Sheath: incontinence 35mm | No                                |                         |

|                      |                                 |
|----------------------|---------------------------------|
| Description          | Latex-free penile sheath.       |
| Use                  | For management of incontinence. |
| Applicable Standards |                                 |
| Note to Procurement  |                                 |

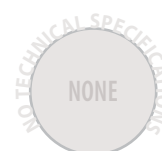

## Skin traction kit

| Catalogue Number | Item Name                | Available on Transversal Contract | Contract Number or Code |
|------------------|--------------------------|-----------------------------------|-------------------------|
| PHC-C-376        | Skin traction kit: adult | No                                |                         |
| PHC-C-377        | Skin traction kit: child | No                                |                         |
|                  |                          |                                   |                         |

|                      |                                                                                                                                                                                                                                                     |
|----------------------|-----------------------------------------------------------------------------------------------------------------------------------------------------------------------------------------------------------------------------------------------------|
| Description          | A complete kit for applying traction to a lower limb.                                                                                                                                                                                               |
| Use                  | A foot plate is attached to the skin of the lower limb, with a fabric strip impregnated with a pressure-sensitive adhesive. Adhesion is reinforced by applying a conformable elastic bandage over the strip. Traction is applied to the foot-plate. |
| Applicable Standards |                                                                                                                                                                                                                                                     |
| Note to Procurement  |                                                                                                                                                                                                                                                     |

## Stockinette: 100mm, roll 25m

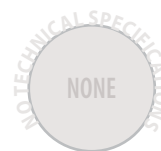

| Catalogue Number | Item Name                    | Available on Transversal Contract | Contract Number or Code |
|------------------|------------------------------|-----------------------------------|-------------------------|
| PHC-C-154        | Stockinette: 100mm, roll 25m | RT 42-2018                        | 42311505-00018          |

|                      |                                                                                                                                             |
|----------------------|---------------------------------------------------------------------------------------------------------------------------------------------|
| Description          | Bandage, tubular, orthopaedic, knitted, cotton-type, stockinette, unbleached Size: width: 100mm Size: length: 25m roll, individually boxed. |
| Use                  | For securing dressings over upper extremities. Very light compression.                                                                      |
| Applicable Standards | SANS 925.                                                                                                                                   |
| Note to Procurement  |                                                                                                                                             |



## Stockinette: 150mm, roll 25m

| Catalogue Number | Item Name                    | Available on Transversal Contract | Contract Number or Code |
|------------------|------------------------------|-----------------------------------|-------------------------|
| PHC-C-186        | Stockinette: 150mm, roll 25m | RT 42-2018                        | 42311505-00019          |

|                      |                                                                                                                                             |
|----------------------|---------------------------------------------------------------------------------------------------------------------------------------------|
| Description          | Bandage, tubular, orthopaedic, knitted, cotton-type, stockinette, unbleached size: width: 150mm size: length: 25m roll, individually boxed. |
| Use                  | For securing dressings over lower extremities.<br>Very light compression.                                                                   |
| Applicable Standards | SANS 925.                                                                                                                                   |
| Note to Procurement  |                                                                                                                                             |

## Suture materials

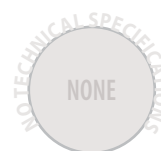

| Catalogue Number | Item Name                              | Available on Transversal Contract | Contract Number or Code |
|------------------|----------------------------------------|-----------------------------------|-------------------------|
| PHC-C-180        | Suture: chromic, 0/0, 75cm             | RT 302-2016                       | 42312201-00157          |
| PHC-C-181        | Suture: sterile, nylon, 2/0, 3/8, 45cm | RT 302-2016                       | 42312201-00340          |
| PHC-C-182        | Suture: sterile, nylon, 4/0, 3/8, 45cm | RT 302-2016                       | 42312201-00331          |

|                      |                                                                                                                                                               |
|----------------------|---------------------------------------------------------------------------------------------------------------------------------------------------------------|
| Description          | Swaged needles with suturing thread.                                                                                                                          |
| Use                  | For closure of skin and sub-dermal layers.<br>Chromic with swaged needle for subdermal suturing.<br>Nylon with swaged needle in 2 sizes, for dermal suturing. |
| Applicable Standards | SANS 494-1:2011.                                                                                                                                              |
| Note to Procurement  |                                                                                                                                                               |





## Swab: 70% isopropyl alcohol

| Catalogue Number | Item Name                   | Available on Transversal Contract | Contract Number or Code |
|------------------|-----------------------------|-----------------------------------|-------------------------|
| PHC-C-155        | Swab: 70% isopropyl alcohol | RT 42-2018                        | 42311505-00053          |

|                      |                                                                                                                                                            |
|----------------------|------------------------------------------------------------------------------------------------------------------------------------------------------------|
| Description          | 24mm X 30mm viscose rayon non-woven fabric.<br>Sterile, individually packed in aluminium foil pouches.<br>Minimum of 0,5ml Isopropyl Alcohol 70% in water. |
| Use                  | Skin preparation prior to injection or venepuncture.                                                                                                       |
| Applicable Standards | Must be registered with MCC (proof of registration required).                                                                                              |
| Note to Procurement  |                                                                                                                                                            |

# Syringe: hypodermic

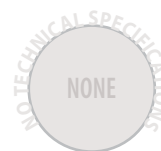

| Catalogue Number | Item Name             | Available on Transversal Contract | Contract Number or Code |
|------------------|-----------------------|-----------------------------------|-------------------------|
| PHC-C-118        | Syringe: 3-part; 2ml  | No                                |                         |
| PHC-C-119        | Syringe: 3-part; 5ml  | No                                |                         |
| PHC-C-120        | Syringe: 3-part; 10ml | No                                |                         |
| PHC-C-121        | Syringe: insulin      | No                                |                         |
| PHC-C-349        | Syringe: 3-part, 20ml | No                                |                         |

|                      |                                                                                                        |                                                                                     |
|----------------------|--------------------------------------------------------------------------------------------------------|-------------------------------------------------------------------------------------|
| Description          | Single-use hypodermic syringe, for the administration of parenteral therapy.                           |  |
| Use                  | 3-part disposable syringe in individual sterile peel pack.<br>Insulin syringe is complete with needle. |                                                                                     |
| Applicable Standards | SANS 1124-2:2011.<br>Insulin syringe SANS 1166:2011.                                                   |                                                                                     |
| Note to Procurement  |                                                                                                        |                                                                                     |



## Tampon: vaginal

| Catalogue Number | Item Name       | Available on Transversal Contract | Contract Number or Code |
|------------------|-----------------|-----------------------------------|-------------------------|
| PHC-C-158        | Tampon: vaginal | No                                |                         |

|                      |                                                                                                                                                                             |
|----------------------|-----------------------------------------------------------------------------------------------------------------------------------------------------------------------------|
| Description          | Tampon, vaginal, autoclavable Absorbent cotton wool with gauze made into a tube. Each.                                                                                      |
| Use                  |                                                                                                                                                                             |
| Applicable Standards | Cotton wool to comply with the latest issue of SANS 228 Absorbent cotton gauze to comply with the latest issue of SANS 446 Compliance certificate to be submitted with bid. |
| Note to Procurement  |                                                                                                                                                                             |

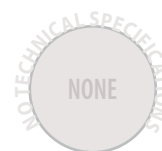

## Tape: surgical. Adhesive, microporous, 25mm

| Catalogue Number | Item Name                                   | Available on Transversal Contract | Contract Number or Code |
|------------------|---------------------------------------------|-----------------------------------|-------------------------|
| PHC-C-159        | Tape, surgical. Adhesive, microporous, 25mm | RT 42-2018                        | 42311707-00001          |

|                      |                                                                                                                                                                                                                                                                                                                                                                                                                                                                                                                                                                                                                                                                                                    |
|----------------------|----------------------------------------------------------------------------------------------------------------------------------------------------------------------------------------------------------------------------------------------------------------------------------------------------------------------------------------------------------------------------------------------------------------------------------------------------------------------------------------------------------------------------------------------------------------------------------------------------------------------------------------------------------------------------------------------------|
| Description          | <p>Tape, surgical, adhesive film, microporous paper consisting of non-woven synthetic fibres spread with a non-occlusive acrylic adhesive.</p> <p>Size: 25mm x 5m.</p> <p>Individually-wrapped or boxed roll.</p> <p>This type of adhesive has been associated with colonisation of partially- used rolls by Methicillin-Resistant Staphylococcus Aureus, as well as Vancomycin-Resistant Enterococci. In the absence of new antibiotics, healthcare workers must ensure that contamination is avoided, but practicing appropriate hand-washing, and storage of unused tape.</p> <p>If left on the skin without monitoring, there is an association with Medical Adhesive-Related skin Injury.</p> |
| Use                  | Skin closure; securing of dressings, cannulas.                                                                                                                                                                                                                                                                                                                                                                                                                                                                                                                                                                                                                                                     |
| Applicable Standards | <p>Surgical tape must permit skin ventilation, be hypo-allergenic, be tolerated by skin for prolonged periods without irritation.</p> <p>BP standards for Permeable Non-woven Surgical Synthetic Adhesive Tape.</p>                                                                                                                                                                                                                                                                                                                                                                                                                                                                                |
| Note to Procurement  |                                                                                                                                                                                                                                                                                                                                                                                                                                                                                                                                                                                                                                                                                                    |

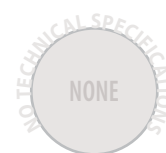

## Tape: surgical. Adhesive, microporous, 50mm

| Catalogue Number | Item Name                                   | Available on Transversal Contract | Contract Number or Code |
|------------------|---------------------------------------------|-----------------------------------|-------------------------|
| PHC-C-185        | Tape, surgical. Adhesive, microporous, 50mm | RT 42-2018                        | 42311707-00002          |

|                      |                                                                                                                                                                                                                                                                                                                                                                                                                                                                                                                                                                                                                                                                                                                                |
|----------------------|--------------------------------------------------------------------------------------------------------------------------------------------------------------------------------------------------------------------------------------------------------------------------------------------------------------------------------------------------------------------------------------------------------------------------------------------------------------------------------------------------------------------------------------------------------------------------------------------------------------------------------------------------------------------------------------------------------------------------------|
| Description          | <p>Tape, surgical, adhesive film, microporous paper consisting of non-woven synthetic fibres spread with a non-occlusive acrylic adhesive.</p> <p>Size: 50mmx5m.</p> <p>Individually wrapped roll to Individually-wrapped or boxed roll.</p> <p>This type of adhesive has been associated with colonisation of partially- used rolls by Methicillin-Resistant Staphylococcus Aureus, as well as Vancomycin-Resistant Enterococci. In the absence of new antibiotics, healthcare workers must ensure that contamination is avoided, but practicing appropriate hand-washing, and storage of unused tape.</p> <p>If left on the skin without monitoring, there is an association with Medical Adhesive-Related skin Injury.”</p> |
| Use                  | Skin closure; securing of dressings, cannulas.                                                                                                                                                                                                                                                                                                                                                                                                                                                                                                                                                                                                                                                                                 |
| Applicable Standards | <p>Surgical tape must permit skin ventilation, be hypo-allergenic, be tolerated by skin for prolonged periods without irritation.</p> <p>BP standards for Permeable Non-woven Surgical Synthetic Adhesive Tape.</p>                                                                                                                                                                                                                                                                                                                                                                                                                                                                                                            |
| Note to Procurement  |                                                                                                                                                                                                                                                                                                                                                                                                                                                                                                                                                                                                                                                                                                                                |



## Thermal blanket

| Catalogue Number | Item Name       | Available on Transversal Contract | Contract Number or Code |
|------------------|-----------------|-----------------------------------|-------------------------|
| PHC-C-179        | Thermal blanket | RT 4-2015                         | RT 4-05-049 ME          |

|                      |                                                                                                                                   |
|----------------------|-----------------------------------------------------------------------------------------------------------------------------------|
| Description          | Aluminium foil laminated in plastic sheeting.                                                                                     |
| Use                  | Used during resuscitation of hypothermia cases. Used in combination with conventional blanket. Disposable. Individually packaged. |
| Applicable Standards | None available.                                                                                                                   |
| Note to Procurement  |                                                                                                                                   |

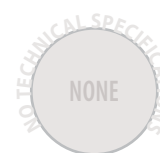

## Thermometer probe covers: disposable

| Catalogue Number | Item Name                            | Available on Transversal Contract | Contract Number or Code |
|------------------|--------------------------------------|-----------------------------------|-------------------------|
| PHC-C-178        | Thermometer probe covers: disposable | No                                |                         |

|                      |                                                                                                                                                                                        |
|----------------------|----------------------------------------------------------------------------------------------------------------------------------------------------------------------------------------|
| Description          | Disposable covers for ear probe of thermometer.                                                                                                                                        |
| Use                  | Disposable probe cover for ear-type thermometer, to avoid cross-contamination.<br>Thermometers typically have an eject button, so that the user does not need to touch the used cover. |
| Applicable Standards |                                                                                                                                                                                        |
| Note to Procurement  | This item must be in series with item chosen for PHC-E-130.                                                                                                                            |

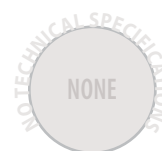

## Tube: stomach washout

| Catalogue Number | Item Name                 | Available on Transversal Contract | Contract Number or Code |
|------------------|---------------------------|-----------------------------------|-------------------------|
| PHC-C-369        | Tube: stomach washout 24F | No                                |                         |
| PHC-C-370        | Tube: stomach washout 26F | No                                |                         |
| PHC-C-371        | Tube: stomach washout 28F | No                                |                         |
| PHC-C-372        | Tube: stomach washout 30F | No                                |                         |

|                      |                                                                      |
|----------------------|----------------------------------------------------------------------|
| Description          | Large-bore oro-gastric tubes.                                        |
| Use                  | Used for rapid evacuation of stomach contents and lavage of stomach. |
| Applicable Standards |                                                                      |
| Note to Procurement  |                                                                      |



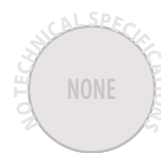

## Ultrasound gel

| Catalogue Number | Item Name                        | Available on Transversal Contract | Contract Number or Code |
|------------------|----------------------------------|-----------------------------------|-------------------------|
| PHC-C-173        | Ultrasound gel: medium viscosity | No                                |                         |

|                      |                                                                                               |
|----------------------|-----------------------------------------------------------------------------------------------|
| Description          | Tube of gel for use in ultrasonography. Non-sterile.                                          |
| Use                  | Improves contact between ultrasound probe and skin, and therefore transmission of ultrasound. |
| Applicable Standards | Aqueous. Hypoallergenic. Bacteriostatic.                                                      |
| Note to Procurement  |                                                                                               |

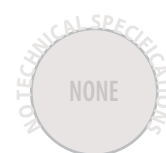

## Urinary catheters (Foley's)

| Catalogue Number | Item Name                         | Available on Transversal Contract | Contract Number or Code |
|------------------|-----------------------------------|-----------------------------------|-------------------------|
| PHC-C-343        | Urinary catheter (Foley's): 8F    | No                                |                         |
| PHC-C-344        | Urinary catheter (Foley's): 10F   | No                                |                         |
| PHC-C-345        | Urinary catheter (Foley's): 12F   | No                                |                         |
| PHC-C-127        | Urinary catheters, (Foley's): 14F | No                                |                         |
| PHC-C-346        | Urinary catheter (Foley's): 16F   | No                                |                         |
| PHC-C-128        | Urinary catheters, (Foley's): 18F | No                                |                         |
| PHC-C-347        | Urinary catheter (Foley's): 20F   | No                                |                         |
| PHC-C-348        | Urinary catheter (Foley's): 22F   | No                                |                         |
| PHC-C-129        | Urinary bag                       | No                                |                         |

|                      |                                                                                                                                                                                     |                                                                                       |
|----------------------|-------------------------------------------------------------------------------------------------------------------------------------------------------------------------------------|---------------------------------------------------------------------------------------|
| Description          | Urinary catheter, Foley pattern, for draining the urinary system when patient's ability to urinate is restricted, or the patient is incontinent.                                    |  |
| Use                  | Smooth PVC catheter, with round insertion end, funnel- shaped proximal end.<br>Inflatable bulb when used as in-dwelling catheter.<br>Sterile peel pack. Can be used with urine bag. |                                                                                       |
| Applicable Standards | SANS 51616:1997.                                                                                                                                                                    |                                                                                       |
| Note to Procurement  |                                                                                                                                                                                     |                                                                                       |

# Point of Care Testing

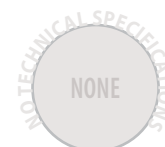

## Glucometer consumables

| Catalogue Number | Item Name              | Available on Transversal Contract | Contract Number or Code |
|------------------|------------------------|-----------------------------------|-------------------------|
| PHC-C-181        | Glucometer test strips | No                                |                         |

|                      |                                                                                                                                                                                                                                                                                                                                      |
|----------------------|--------------------------------------------------------------------------------------------------------------------------------------------------------------------------------------------------------------------------------------------------------------------------------------------------------------------------------------|
| Description          | The glucometer test strips have an absorbent pad, which contains chemicals that bind with glucose, and in so doing, produce a measurable electric current, or a colour change, depending on the technology used by the meter. The meter reads the current or the intensity of the colour, and converts it into a concentration.      |
| Use                  | A lancets is used to obtain a drop of capillary blood from the patient (usually from a finger). The drop is absorbed on the pad of the test strip. The test strip is then placed inside the appropriate slot in the meter.<br>Observe strict cross-infection control measures.<br>Biosafety waste disposal containers are mandatory. |
| Applicable Standards | None available.                                                                                                                                                                                                                                                                                                                      |
| Note to Procurement  | The suppliers of meters and test strips often supply a number of meters at no cost, based on the volumes of strips purchased. it is therefore important to standardise on the type/model of meter, at least regionally, if not nationally.                                                                                           |

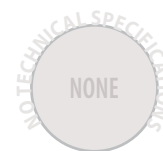

## Haemoglobinmeter consumables and accessories (older models)

| Catalogue Number | Item Name                           | Available on Transversal Contract | Contract Number or Code |
|------------------|-------------------------------------|-----------------------------------|-------------------------|
| PHC-C-167        | Haemolysis applicator sticks        | No                                |                         |
| PHC-C-168        | Haemoglobinmeter clip               | No                                |                         |
| PHC-C-169        | Haemoglobin chamber: glass, grooved | No                                |                         |
| PHC-C-170        | Haemoglobin cover glass: plain      | No                                |                         |

|                      |                                                                                                                                                                                                                                                                                                                                                                                                                                                                                                                                                                                                                                                                                                                                                                                                                                                                              |
|----------------------|------------------------------------------------------------------------------------------------------------------------------------------------------------------------------------------------------------------------------------------------------------------------------------------------------------------------------------------------------------------------------------------------------------------------------------------------------------------------------------------------------------------------------------------------------------------------------------------------------------------------------------------------------------------------------------------------------------------------------------------------------------------------------------------------------------------------------------------------------------------------------|
| Description          | These consumables and accessories are specific to the older type of haemoglobinometer, many of which are still in use.                                                                                                                                                                                                                                                                                                                                                                                                                                                                                                                                                                                                                                                                                                                                                       |
| Use                  | <p>The capillary blood sample obtained from a lancet-prick, is placed on the glass chamber. The haemolysis applicator stick is swirled inside the blood sample, until it has a uniform translucent appearance. The chamber is then covered with a glass cover slip, and the chamber plus cover slip are inserted into a metal clip.</p> <p>The combined unit is placed into a slot in the haemoglobinometer.</p> <p>A sliding knob is positioned until two images in the viewfinder match in colour. The haemoglobin concentration is then read from a scale on the side of the instrument.</p> <p>The chamber and clip are re-usable. The cover slips and applicator sticks are disposable.</p> <p>Observe strict cross-infection control measures.</p> <p>Biosafety waste disposal containers are mandatory.</p> <p>Wash the chamber and clip thoroughly between uses.</p> |
| Applicable Standards | None available.                                                                                                                                                                                                                                                                                                                                                                                                                                                                                                                                                                                                                                                                                                                                                                                                                                                              |
| Note to Procurement  | None.                                                                                                                                                                                                                                                                                                                                                                                                                                                                                                                                                                                                                                                                                                                                                                                                                                                                        |

# Haemoglobinmeter consumables (newer models)

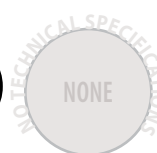

| Catalogue Number | Item Name             | Available on Transversal Contract | Contract Number or Code |
|------------------|-----------------------|-----------------------------------|-------------------------|
| PHC-C-182        | Hb meter test strips  | No                                |                         |
| PHC-C-183        | Hb meter microcuvette | No                                |                         |
|                  |                       |                                   |                         |

|                      |                                                                                                                                                                                                                                                                                                                                                                                                                                                                                                                                 |
|----------------------|---------------------------------------------------------------------------------------------------------------------------------------------------------------------------------------------------------------------------------------------------------------------------------------------------------------------------------------------------------------------------------------------------------------------------------------------------------------------------------------------------------------------------------|
| Description          | Modern electronic haemoglobinometers operate on one of two principles: either by measuring the amount of light of a specific wavelength passing through (or reflected from) a blood sample, or by measuring the intensity of colour change, when blood is mixed with a reagent.                                                                                                                                                                                                                                                 |
| Use                  | <p>In colorimetric haemoglobinometers, a lancet-prick blood drop is applied to the reagent-containing pad on a test strip.</p> <p>The strip is inserted into the meter, and a reading is obtained.</p> <p>In photometric haemoglobinometers, the blood drop is applied to a microcuvette. The microcuvette is placed in the instrument, and a reading is obtained.</p> <p>All consumables are disposable.</p> <p>Observe strict cross-infection control measures.</p> <p>Biosafety waste disposal containers are mandatory.</p> |
| Applicable Standards | None available.                                                                                                                                                                                                                                                                                                                                                                                                                                                                                                                 |
| Note to Procurement  | <p>The suppliers of test strips or microcuvettes may provide a number of free meters, depending on volumes purchased.</p> <p>Hence it is important to standardise regionally, if not nationally.</p> <p>Test strips and microcuvettes are meter-specific, and are not interchangeable among brands.</p>                                                                                                                                                                                                                         |

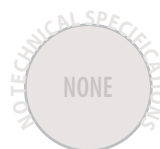

## HIV test kit: rapid

| Catalogue Number | Item Name           | Available on Transversal Contract | Contract Number or Code |
|------------------|---------------------|-----------------------------------|-------------------------|
| PHC-C-199        | HIV test kit: rapid | RT 41-2017                        |                         |

|                      |                                                                                                                                                                                                                                                                                                                                                                                                                                                                                                                    |
|----------------------|--------------------------------------------------------------------------------------------------------------------------------------------------------------------------------------------------------------------------------------------------------------------------------------------------------------------------------------------------------------------------------------------------------------------------------------------------------------------------------------------------------------------|
| Description          | Cassette-based Rapid test kit for screening for HIV.                                                                                                                                                                                                                                                                                                                                                                                                                                                               |
| Use                  | <p>For rapid screening for HIV in human serum, plasma, venous or capillary whole blood.</p> <p>The contract was awarded to 5 suppliers. Specifications and Instructions for use vary with supplier. Refer to instructions supplied by the supplier.</p> <p>All kits have in common chromatographic process, in which HIV antibodies, if present, cause one or more coloured lines to appear.</p> <p>Observe strict cross-infection control measures.</p> <p>Biosafety waste disposal containers are mandatory.</p> |
| Applicable Standards | WHO pre-qualification.                                                                                                                                                                                                                                                                                                                                                                                                                                                                                             |
| Note to Procurement  | The current RT 41 appears to contain kits which are WHO pre-qualified, as well as some which may not be. Future procurement should ensure uniformity of quality.                                                                                                                                                                                                                                                                                                                                                   |

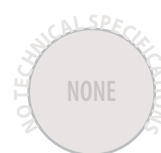

## Lancets, Multipurpose

| Catalogue Number | Item Name             | Available on Transversal Contract | Contract Number or Code |
|------------------|-----------------------|-----------------------------------|-------------------------|
| PHC-C-146        | Lancets, multipurpose | No                                |                         |

|                      |                                                                                                                                                                                                                                                                                                                                                                                                                                                                                                                                                                                                                                                                                                                                                                                                                 |  |
|----------------------|-----------------------------------------------------------------------------------------------------------------------------------------------------------------------------------------------------------------------------------------------------------------------------------------------------------------------------------------------------------------------------------------------------------------------------------------------------------------------------------------------------------------------------------------------------------------------------------------------------------------------------------------------------------------------------------------------------------------------------------------------------------------------------------------------------------------|--|
| Description          | <p>A single-use, sharp-pointed, sterile, disposable device, containing a short, sharpened needle, and a twist-off protective cap. There are three types of devices:</p> <ol style="list-style-type: none"> <li>Traditional simple stamped – metal strip, with point at one end</li> <li>The second type has a plastic body, with an integral twist-off needle cap. Can be used manually, but is often sold with a separate lancing device, into which it is inserted. In this type, the protective cap must be re-installed before discarding</li> <li>Spring-loaded – after puncturing the skin, the needle is retracted for safety, and the device cannot be re-used.</li> </ol> <p>Individually packed, in Boxes. Needle size 23 Gauge or smaller, protrusion depth approx. 2mm. Stainless steel needle.</p> |  |
| Use                  | <p>The device is used to obtain a capillary blood sample from a finger-prick. For repeated daily use by a patient, the automatic lancing device is recommendable to lessen pain.</p> <p>Observe skin cleansing and sharps procedures. Observe cross-contamination procedures. Sharps disposal only. Danger of accidental finger-stick in non-self-retracting types.</p> <p>Biosafety waste disposal containers are mandatory.</p>                                                                                                                                                                                                                                                                                                                                                                               |  |
| Applicable Standards | ISO 23908:2011 Sharps injury protection.                                                                                                                                                                                                                                                                                                                                                                                                                                                                                                                                                                                                                                                                                                                                                                        |  |
| Note to Procurement  | Self-retracting type is preferable, if price is affordable. Factor in the cost of lancing devices for non-self-retracting types.                                                                                                                                                                                                                                                                                                                                                                                                                                                                                                                                                                                                                                                                                |  |

# Malaria Rapid Diagnostic test kit

| Catalogue Number | Item Name                         | Available on Transversal Contract | Contract Number or Code |
|------------------|-----------------------------------|-----------------------------------|-------------------------|
| PHC-C-200        | Malaria Rapid Diagnostic test kit | No                                |                         |

|                      |                                                                                                                                                                                                                                                                                                                                                                                                                                                                                                                                                                                                                                            |                                                                                     |
|----------------------|--------------------------------------------------------------------------------------------------------------------------------------------------------------------------------------------------------------------------------------------------------------------------------------------------------------------------------------------------------------------------------------------------------------------------------------------------------------------------------------------------------------------------------------------------------------------------------------------------------------------------------------------|-------------------------------------------------------------------------------------|
| Description          | Cassette-type rapid test kit for malaria screening.                                                                                                                                                                                                                                                                                                                                                                                                                                                                                                                                                                                        |  |
| Use                  | <p>For screening of suspected malaria cases in provinces where malaria is endemic. Not a replacement for microscopy.</p> <p>Detects malaria antigens (proteins produced by the malaria parasite) in human blood. Capillary blood is obtained via a lancet prick.</p> <p>Note that most test kits require a few drops of a buffer solution (supplied with the kit) to be added to the cassette, after the blood specimen.</p> <p>A visible line forms on a chromatography strip, if antigen is present in the sample.</p> <p>Observe strict cross-infection control measures.</p> <p>Biosafety waste disposal containers are mandatory.</p> |                                                                                     |
| Applicable Standards |                                                                                                                                                                                                                                                                                                                                                                                                                                                                                                                                                                                                                                            |                                                                                     |
| Note to Procurement  | WHO pre-qualification would be ideal.                                                                                                                                                                                                                                                                                                                                                                                                                                                                                                                                                                                                      |                                                                                     |





# Pregnancy test kit

| Catalogue Number | Item Name          | Available on Transversal Contract | Contract Number or Code |
|------------------|--------------------|-----------------------------------|-------------------------|
| PHC-C-201        | Pregnancy test kit | No                                |                         |

|                      |                                                                                                                                                                                                                                   |                                                                                     |
|----------------------|-----------------------------------------------------------------------------------------------------------------------------------------------------------------------------------------------------------------------------------|-------------------------------------------------------------------------------------|
| Description          | Strip or cassette type rapid test kit for pregnancy screening.                                                                                                                                                                    |  |
| Use                  | Screening test on mid-stream urine. Urine collection device and pipette included with cassette type, but not with strip type.<br>Test is a antibody-based test for hCG. A colour change is produced in a line if hCG is detected. |                                                                                     |
| Applicable Standards |                                                                                                                                                                                                                                   |                                                                                     |
| Note to Procurement  | In addition to the latest ISO 13485, the following information should be requested from potential suppliers:<br>Analytical sensitivity<br>Analytical specificity<br>Accuracy<br>Clinical sensitivity<br>Clinical specificity.     |                                                                                     |



## Rhesus test kit

| Catalogue Number | Item Name       | Available on Transversal Contract | Contract Number or Code |
|------------------|-----------------|-----------------------------------|-------------------------|
| PHC-C-204        | Rhesus test kit | No                                |                         |

|                      |                                                                                                                                                                                                                                                                                                                                                                                                                                                                                                           |
|----------------------|-----------------------------------------------------------------------------------------------------------------------------------------------------------------------------------------------------------------------------------------------------------------------------------------------------------------------------------------------------------------------------------------------------------------------------------------------------------------------------------------------------------|
| Description          | A simple screening test to determine whether a pregnant woman is Rh-negative.                                                                                                                                                                                                                                                                                                                                                                                                                             |
| Use                  | The test is based on red cell clumping. If the patient has Rh factor, the red cells in the sample will clump. If the patient is Rh-negative, the red cells remain un-clumped. Rh-negative women require monitoring through pregnancy. A decision to administer Anti-D immunoglobulin will be taken, should the patient's Rh status change. Failure to detect Rh-negative status, and intervention if necessary, can lead to Haemolytic disease of the Newborn, if the foetus inherits Rh from the father. |
| Applicable Standards | None.                                                                                                                                                                                                                                                                                                                                                                                                                                                                                                     |
| Note to Procurement  |                                                                                                                                                                                                                                                                                                                                                                                                                                                                                                           |

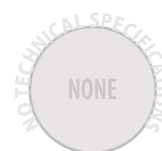

## Urine dip sticks

| Catalogue Number | Item Name        | Available on Transversal Contract | Contract Number or Code |
|------------------|------------------|-----------------------------------|-------------------------|
| PHC-C-205        | Urine Dip Sticks | No                                |                         |

|                      |                                                                                                                                                                                                                                                                                                                                                                                                                                                                                                                                                   |                                                                                     |
|----------------------|---------------------------------------------------------------------------------------------------------------------------------------------------------------------------------------------------------------------------------------------------------------------------------------------------------------------------------------------------------------------------------------------------------------------------------------------------------------------------------------------------------------------------------------------------|-------------------------------------------------------------------------------------|
| Description          | <p>Plastic test strips with reagent-impregnated mats, which change colour depending on the presence of certain substances in the patient's urine.</p>                                                                                                                                                                                                                                                                                                                                                                                             |  |
| Use                  | <p>The strip is dipped into a fresh, preferably mid-stream, urine sample. The time taken for the full colour to develop, will be stated by the manufacturer (typically 60 to 120 seconds).</p> <p>The strips are multi-parameter test strips, typically testing for the presence of: Protein, glucose, ketones, haemoglobin, bilirubin, acetone, nitrites, leucocytes, pH and specific gravity. Most of the tests are semi-quantitative, i.e. they give an indication of the concentration of the substance of interest, in the urine sample.</p> |                                                                                     |
| Applicable Standards | FDA approval or substantial equivalence determination.                                                                                                                                                                                                                                                                                                                                                                                                                                                                                            |                                                                                     |
| Note to Procurement  | It is advisable to submit a random sample of strips from an unrecognised supplier, for comparative testing to the NHLS, before finalising procurement.                                                                                                                                                                                                                                                                                                                                                                                            |                                                                                     |

# Obstetric

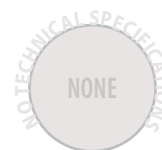

## Cord clamp: umbilical

| Catalogue Number | Item Name             | Available on Transversal Contract | Contract Number or Code |
|------------------|-----------------------|-----------------------------------|-------------------------|
| PHC-C-163        | Cord clamp: umbilical | No                                |                         |

|                      |                                                                                |                                                                                      |
|----------------------|--------------------------------------------------------------------------------|--------------------------------------------------------------------------------------|
| Description          | Self-locking hinged plastic clamp.                                             |  |
| Use                  | To clamp off umbilical cord before severing. Sterile peel-pack, non re-usable. |                                                                                      |
| Applicable Standards | CKS 312:2009.                                                                  |                                                                                      |
| Note to Procurement  |                                                                                |                                                                                      |

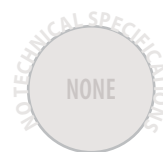

## Sanitary towels: maternity

| Catalogue Number | Item Name                  | Available on Transversal Contract | Contract Number or Code |
|------------------|----------------------------|-----------------------------------|-------------------------|
| PHC-C-156        | Sanitary towels: maternity | No                                |                         |

|                      |                                          |
|----------------------|------------------------------------------|
| Description          | Larger size sanitary towels. Pack.       |
| Use                  | Post-delivery haemorrhage and discharge. |
| Applicable Standards |                                          |
| Note to Procurement  |                                          |

# Oral health

**Note:** to avoid duplication, the following items are listed elsewhere in this Clinical Consumables section:

- Cotton wool balls
- Local anaesthetic cartridges
- Scalpel blades
- Dental needles - used widely for local anaesthetic.

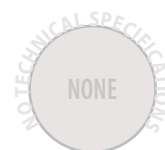

## Acid etch

| Catalogue Number | Item Name        | Available on Transversal Contract | Contract Number or Code |
|------------------|------------------|-----------------------------------|-------------------------|
| PHC-C-220        | Acid etch        | RT296                             | RT296-02-189            |
| PHC-C-221        | Composite cement | RT296                             | RT296-02-038            |

|                      |                                                                                                                                                                                                                                 |
|----------------------|---------------------------------------------------------------------------------------------------------------------------------------------------------------------------------------------------------------------------------|
| Description          | RT 296-02-189: Resin. restorative, dental: acid etch gel, 35% Ortho-phosphoric acid. 1 Bottle 6ml.<br>RT296-02-038: Cement, zinc oxide, dental: Temporary non-eugenol cement, set Set- 1 tube Base 50g, 1 tube Accelerator 15g. |
| Use                  | 2 step preparation of cavity for filling. Etch is applied first, then cement.                                                                                                                                                   |
| Applicable Standards |                                                                                                                                                                                                                                 |
| Note to Procurement  |                                                                                                                                                                                                                                 |

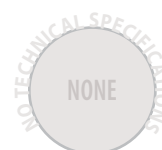

## Amalgam capsule

| Catalogue Number | Item Name       | Available on Transversal Contract | Contract Number or Code |
|------------------|-----------------|-----------------------------------|-------------------------|
| PHC-C-222        | Amalgam capsule | RT296-2015                        | RT296-02-040            |

|                      |                                                                                                                                                                      |
|----------------------|----------------------------------------------------------------------------------------------------------------------------------------------------------------------|
| Description          | Capsules of a preparation used in dental fillings.                                                                                                                   |
| Use                  | Silver alloy powder and mercury capsule, mixing, dental: amalgam, dispersed phase, admixed, non-gamma 2 capsules, 1 spill regular set: 1 Box 50 pieces, 400 mg each. |
| Applicable Standards |                                                                                                                                                                      |
| Note to Procurement  |                                                                                                                                                                      |

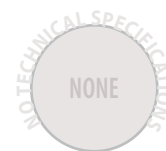

## Anaesthetic: topical

| Catalogue Number | Item Name            | Available on Transversal Contract | Contract Number or Code |
|------------------|----------------------|-----------------------------------|-------------------------|
| PHC-C-223        | Anaesthetic: topical | RT296                             | RT296-01-004            |
|                  |                      |                                   |                         |

|                      |                                                                           |
|----------------------|---------------------------------------------------------------------------|
| Description          | Analgesic and anaesthetic gel: local, surface, lignocaine base, 43g tube. |
| Use                  |                                                                           |
| Applicable Standards |                                                                           |



## Apron: dental, plastic

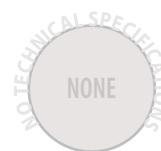

| Catalogue Number | Item Name             | Available on Transversal Contract | Contract Number or Code |
|------------------|-----------------------|-----------------------------------|-------------------------|
| PHC-C-224        | Apron: plastic, adult | RT296                             | RT296-08-147            |
| PHC-C-225        | Apron: plastic. child | RT296                             | RT296-08-148            |

|                      |                                                                |
|----------------------|----------------------------------------------------------------|
| Description          | Apron dental, plastic: Adult.<br>Apron dental, plastic: Child. |
| Use                  | To protect patient's clothing.                                 |
| Applicable Standards |                                                                |
| Note to Procurement  |                                                                |

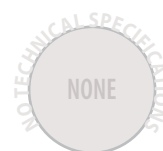

## Articulating paper: thin, blue

| Catalogue Number | Item Name                      | Available on Transversal Contract | Contract Number or Code |
|------------------|--------------------------------|-----------------------------------|-------------------------|
| PHC-C-226        | Articulating paper: thin, blue | RT296                             | RT296-07-002            |

|                      |                                                                                         |
|----------------------|-----------------------------------------------------------------------------------------|
| Description          | Paper, articulating, dental: Thin, blue, width 20mm 1 box 12 books, 12 sheets per book. |
| Use                  | Used to check occlusion of teeth after a reconstructive procedure.                      |
| Applicable Standards |                                                                                         |
| Note to Procurement  |                                                                                         |

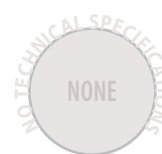

## Bib: plastic

| Catalogue Number | Item Name    | Available on Transversal Contract | Contract Number or Code |
|------------------|--------------|-----------------------------------|-------------------------|
| PHC-C-227        | Bib: plastic | RT296                             | RT296-08-147            |

|                      |                                                                               |
|----------------------|-------------------------------------------------------------------------------|
| Description          | Bib dental, disposable, 2 ply paper, 1 ply poly, Approx 40 x 45mm pack of 50. |
| Use                  | Applied to protect patient's clothing while on the chair.                     |
| Applicable Standards |                                                                               |
| Note to Procurement  |                                                                               |

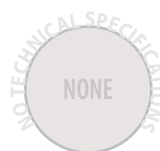

## Bonding agent: self-etch

| Catalogue Number | Item Name                | Available on Transversal Contract | Contract Number or Code |
|------------------|--------------------------|-----------------------------------|-------------------------|
| PHC-C-228        | Bonding agent: self-etch | RT296                             | RT296-02-240            |

|                      |                                                                       |
|----------------------|-----------------------------------------------------------------------|
| Description          | Resin restorative dental: Self-etch adhesive: 1 bottle of 5ml.        |
| Use                  | 1-step etching and bonding liquid, to prepare cavity for restoration. |
| Applicable Standards |                                                                       |
| Note to Procurement  |                                                                       |

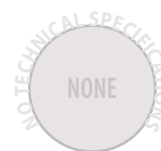

## Brush: applicator

| Catalogue Number | Item Name            | Available on Transversal Contract | Contract Number or Code |
|------------------|----------------------|-----------------------------------|-------------------------|
| PHC-C-229        | Applicator brush tip | RT296                             | RT296-02-191            |

|                      |                                                                           |
|----------------------|---------------------------------------------------------------------------|
| Description          | Tip, applicator brush, dental: inspiral brush tips 1 container 20 pieces. |
| Use                  | For the application of acid etch and bonding agents.                      |
| Applicable Standards |                                                                           |
| Note to Procurement  |                                                                           |



## Cement: zinc oxide and eugenol

| Catalogue Number | Item Name                      | Available on Transversal Contract | Contract Number or Code |
|------------------|--------------------------------|-----------------------------------|-------------------------|
| PHC-C-230        | Cement: zinc oxide and eugenol | RT296                             | RT296-02-036            |

|                      |                                                                                                                                                                          |
|----------------------|--------------------------------------------------------------------------------------------------------------------------------------------------------------------------|
| Description          | Cement, zinc oxide and eugenol, dental lining/temporary restorative, powder and liquid , set, high compressive strength, Set: 1 bottle powder 40g, 1 bottle liquid 15ml. |
| Use                  |                                                                                                                                                                          |
| Applicable Standards |                                                                                                                                                                          |
| Note to Procurement  |                                                                                                                                                                          |

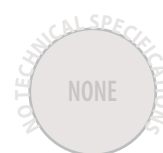

# Composites

| Catalogue Number | Item Name            | Available on Transversal Contract | Contract Number or Code |
|------------------|----------------------|-----------------------------------|-------------------------|
| PHC-C-231        | Composite: colour A2 | RT296-2015                        | RT296-02-111            |
| PHC-C-232        | Composite: colour B2 | RT296-2015                        | RT296-02-115            |

|                      |                                                                                                                                                                                                                         |
|----------------------|-------------------------------------------------------------------------------------------------------------------------------------------------------------------------------------------------------------------------|
| Description          | Resin, restorative, dental: hybrid composite, ant/post restorative, light cured, with zirconium\silicon filler Capsules. 3.6g capsules (18x0.20g each).<br>RT296-02-111 colour A2 Vita.<br>RT296-02-115 colour B2 Vita. |
| Use                  | Facility to choose one of the above colours. For non-amalgam restorations.                                                                                                                                              |
| Applicable Standards |                                                                                                                                                                                                                         |
| Note to Procurement  |                                                                                                                                                                                                                         |

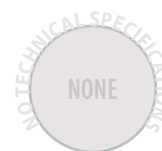

## Cotton wool pellets

| Catalogue Number | Item Name           | Available on Transversal Contract | Contract Number or Code |
|------------------|---------------------|-----------------------------------|-------------------------|
| PHC-C-233        | Cotton wool pellets | RT296                             | RT296-08-177            |

|                      |                                                                                         |
|----------------------|-----------------------------------------------------------------------------------------|
| Description          | Pellet, absorbent: dental cotton wool , No 4 1 box 1000 pieces.                         |
| Use                  | Used as packing around a tooth during removal of carious dentine, and to pack a cavity. |
| Applicable Standards |                                                                                         |
| Note to Procurement  |                                                                                         |



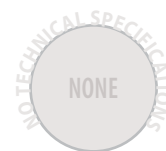

## Dental floss: Waxed

| Catalogue Number | Item Name           | Available on Transversal Contract | Contract Number or Code |
|------------------|---------------------|-----------------------------------|-------------------------|
| PHC-C-234        | Dental floss: waxed | RT296                             | RT296-05-017            |

|                      |                                                |
|----------------------|------------------------------------------------|
| Description          | Floss, waxed, dental: Nylon 1 reel 4,5 metres. |
| Use                  | For cleaning between teeth.                    |
| Applicable Standards |                                                |
| Note to Procurement  |                                                |

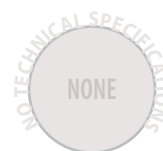

## Dry socket alveolar paste

| Catalogue Number | Item Name                 | Available on Transversal Contract | Contract Number or Code |
|------------------|---------------------------|-----------------------------------|-------------------------|
| PHC-C-235        | Dry socket alveolar paste | RT296                             | RT296-06-016            |

|                      |                                                                                                                                                                                                                                                                   |
|----------------------|-------------------------------------------------------------------------------------------------------------------------------------------------------------------------------------------------------------------------------------------------------------------|
| Description          | Therapeutic, post-surgical, dental: Dry socket alveolar paste, based on Iodoform, butyl-paraminobenzoate and eugenol formula 1 jar, 12g.                                                                                                                          |
| Use                  | To pack a tooth socket after extraction, when a blood clot has not formed, and there is a risk of infection. The paste forms a barrier, and has analgesic and anaesthetic properties. It aids haemostasis. It is gradually eliminated by mouth and tongue action. |
| Applicable Standards |                                                                                                                                                                                                                                                                   |
| Note to Procurement  |                                                                                                                                                                                                                                                                   |



## Fissure sealants

| Catalogue Number | Item Name                  | Available on Transversal Contract | Contract Number or Code |
|------------------|----------------------------|-----------------------------------|-------------------------|
| PHC-C-236        | Sealant: glass ionomer kit | RT296-2015                        | RT296-02-174            |

|                      |                                                                                                                                                    |
|----------------------|----------------------------------------------------------------------------------------------------------------------------------------------------|
| Description          | Sealant glass ionomer kit, dental, pit and fissure: Temporary sealant for air abrasive technique coloured chemical cured and light cured capsules. |
| Use                  | To seal pits and fissures in teeth.                                                                                                                |
| Applicable Standards |                                                                                                                                                    |
| Note to Procurement  |                                                                                                                                                    |



## Fluoride trays

| Catalogue Number | Item Name             | Available on Transversal Contract | Contract Number or Code |
|------------------|-----------------------|-----------------------------------|-------------------------|
| PHC-C-242        | Fluoride tray: large  |                                   | RT296-05-006            |
| PHC-C-243        | Fluoride tray: medium |                                   | RT296-05-007            |
| PHC-C-244        | Fluoride tray: small  |                                   | RT296-05-008            |

|                      |                                                                                                                                                                                                                                                                                                              |
|----------------------|--------------------------------------------------------------------------------------------------------------------------------------------------------------------------------------------------------------------------------------------------------------------------------------------------------------|
| Description          | RT296-05-006: Fluoride application tray, dental: Disposable, large double arch 1 Pack 100 Pieces.<br>RT296-05-007: Fluoride application tray, dental: Disposable, medium double arch 1 Pack 100 Pieces.<br>RT296-05-008: Fluoride application tray, dental: Disposable, small double arch 1 Pack 100 Pieces. |
| Use                  | For the prophylactic application of fluoride gel to upper and lower dental arches.                                                                                                                                                                                                                           |
| Applicable Standards |                                                                                                                                                                                                                                                                                                              |
| Note to Procurement  |                                                                                                                                                                                                                                                                                                              |



# Fluoride gel

| Catalogue Number | Item Name                 | Available on Transversal Contract | Contract Number or Code |
|------------------|---------------------------|-----------------------------------|-------------------------|
| PHC-C-245        | Gel: fluoride, APF        | RT296                             | RT296-05-002            |
| PHC-C-246        | Gel: fluoride, 2,0%       | RT296                             | RT296-05-003            |
| PHC-C-247        | Gel: fluoride, varnish    | RT296                             | RT296-05-004            |
| PHC-C-238        | Resin: protective sealant | RT296-2015                        | RT296-02-180            |

|                      |                                                                                                                                                                                                                                                                                                                                                                                                                                                                                                                   |
|----------------------|-------------------------------------------------------------------------------------------------------------------------------------------------------------------------------------------------------------------------------------------------------------------------------------------------------------------------------------------------------------------------------------------------------------------------------------------------------------------------------------------------------------------|
| Description          | <p>RT296-05-002: Fluoride, topical application, dental: APF fluoride gel. 1 bottle.</p> <p>RT296-05-003: Sodium Fluoride Oral Solution, USP: Dental, Topical application, neutral, 2,0 % 1Bottle.</p> <p>RT296-05-004: Sodium fluoride GEL: Dental, Topical application, varnish 50 mg sodium fluoride per ml, fluoride varnish 1 Tube 10ml.</p> <p>RT296-02-180: Resin, restorative, dental: protective sealant (desensitiser and fluoride releaser), Standard package, 1 bottle applicator tips and dishes.</p> |
| Use                  | Used in preventive dentistry to enhance tooth resistance to decay.                                                                                                                                                                                                                                                                                                                                                                                                                                                |
| Applicable Standards |                                                                                                                                                                                                                                                                                                                                                                                                                                                                                                                   |
| Note to Procurement  |                                                                                                                                                                                                                                                                                                                                                                                                                                                                                                                   |

## Glass ionomer



| Catalogue Number | Item Name                  | Available on Transversal Contract | Contract Number or Code |
|------------------|----------------------------|-----------------------------------|-------------------------|
| PHC-C-248        | Glass ionomer: restorative | RT296                             | RT296-02-042            |

|                      |                                                                                                                                  |
|----------------------|----------------------------------------------------------------------------------------------------------------------------------|
| Description          | Glass ionomer, restorative, dental: posterior restorations, primary teeth restorations, core build-up, capsule introductory kit. |
| Use                  | For tooth restoration.                                                                                                           |
| Applicable Standards |                                                                                                                                  |
| Note to Procurement  |                                                                                                                                  |



## Haemostat sponge

| Catalogue Number | Item Name        | Available on Transversal Contract | Contract Number or Code |
|------------------|------------------|-----------------------------------|-------------------------|
| PHC-C-249        | Haemostat sponge | RT296                             | RT296-06-012            |

|                      |                                                                               |
|----------------------|-------------------------------------------------------------------------------|
| Description          | Haemostatic agent, dental: Haem fibrin sponges, resorbable. 1 Jar 24 sponges. |
| Use                  | To staunch bleeding after intra-oral procedures.                              |
| Applicable Standards | Non-pyrogenic, biocompatible.                                                 |
| Note to Procurement  |                                                                               |

## Paste: prophylaxis



| Catalogue Number | Item Name          | Available on Transversal Contract | Contract Number or Code |
|------------------|--------------------|-----------------------------------|-------------------------|
| PHC-C-250        | Paste: prophylaxis | RT296                             | RT296-05-011            |

|                      |                                                                                                               |
|----------------------|---------------------------------------------------------------------------------------------------------------|
| Description          | Paste, preventive dentistry with fluoride, medium grit, flavoured 1 Box 200 cups with 2 plastic finger rings. |
| Use                  | Fluoride paste for caries prophylaxis.                                                                        |
| Applicable Standards |                                                                                                               |
| Note to Procurement  |                                                                                                               |





## Polishing kit

| Catalogue Number | Item Name                   | Available on Transversal Contract | Contract Number or Code |
|------------------|-----------------------------|-----------------------------------|-------------------------|
| PHC-C-251        | Finishing and polishing kit | RT 296                            | RT296-11-152            |

|                      |                                                                                                                                                                                                                                                                        |
|----------------------|------------------------------------------------------------------------------------------------------------------------------------------------------------------------------------------------------------------------------------------------------------------------|
| Description          | Finishing and polishing kit: composite restorations, discs, points, cups, mandrels and gloss kit: 20 finishing discs, 10 finishing cups, 10 finishing points, 25 polishing cups, 1 metal mandrel, 1 x 4g syringe prisma gloss, 1 x 4g syringe prisma gloss extra fine. |
| Use                  | Finishing and polishing kit for composite restorations.                                                                                                                                                                                                                |
| Applicable Standards |                                                                                                                                                                                                                                                                        |
| Note to Procurement  |                                                                                                                                                                                                                                                                        |



## Polishing strips

| Catalogue Number | Item Name                            | Available on Transversal Contract | Contract Number or Code |
|------------------|--------------------------------------|-----------------------------------|-------------------------|
| PHC-C-252        | Polishing strip: coarse/medium grit  | RT296                             | RT296-08-002            |
| PHC-C-253        | Polishing strip: fine/superfine grit | RT296                             | RT296-08-003            |

|                      |                                                                                                                                                                      |
|----------------------|----------------------------------------------------------------------------------------------------------------------------------------------------------------------|
| Description          | Strip, abrasive, dental: Plastic backed, coarse/medium grit, centre gap 1 box 120 pieces.<br>RT296-08-002: Coarse/medium grit.<br>RT296-08-003: Fine/superfine grit. |
| Use                  | For shaping, polishing and finishing restorations.                                                                                                                   |
| Applicable Standards |                                                                                                                                                                      |
| Note to Procurement  |                                                                                                                                                                      |



## Polyester strips (composite)

| Catalogue Number | Item Name                              | Available on Transversal Contract | Contract Number or Code |
|------------------|----------------------------------------|-----------------------------------|-------------------------|
| PHC-C-254        | Polyester strips (composite), curved   | RT296                             | RT296-08-004            |
| PHC-C-255        | Polyester strips (composite), straight | RT296                             | RT296-08-005            |

|                      |                                                                                                                                                          |
|----------------------|----------------------------------------------------------------------------------------------------------------------------------------------------------|
| Description          | Strip, matrix, dental: composite technique, polyester, curved 10mm 1 box.<br>Strip, matrix, dental: composite technique, polyester, straight 10mm 1 box. |
| Use                  | Thin polyester strips coated with microfine abrasive particles, for the polishing and finishing of composite restorations.                               |
| Applicable Standards |                                                                                                                                                          |
| Note to Procurement  |                                                                                                                                                          |

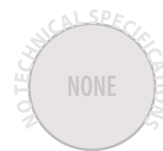

## Suture material: intra-oral

| Catalogue Number | Item Name                                                | Available on Transversal Contract | Contract Number or Code |
|------------------|----------------------------------------------------------|-----------------------------------|-------------------------|
| PHC-C-330        | Suture: chromic, 3/0, needle 19mm, 3/8 reverse cutting   | RT302-2016                        | 42312201-00047          |
| PHC-C-331        | Suture: chromic, 4/0, needle 19mm, 1/2 reverse cutting   | RT302-2016                        | 42312201-00036          |
| PHC-C-332        | Suture: chromic, 6/0, needle 11,5mm, 3/8 reverse cutting | RT302-2016                        | 42312201-00034          |

|                      |                                                                    |
|----------------------|--------------------------------------------------------------------|
| Description          | Absorbable suture material, in sizes suitable for intra-oral work. |
| Use                  | For intra-oral suturing, fine skin suturing (oral margins).        |
| Applicable Standards | SANS494-1:2011.                                                    |
| Note to Procurement  |                                                                    |

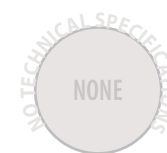

## Tip: dental suction (saliva ejector)

| Catalogue Number | Item Name                        | Available on Transversal Contract | Contract Number or Code |
|------------------|----------------------------------|-----------------------------------|-------------------------|
| PHC-C-256        | Tip: dental suction, high volume | RT296-2015                        | RT296-08-158            |
| PHC-C-257        | Tip: dental suction, low volume  | RT296-2015                        | RT296-08-160            |

|                      |                                                                                                                                                                                   |
|----------------------|-----------------------------------------------------------------------------------------------------------------------------------------------------------------------------------|
| Description          | <p>Plastic disposable suction tip.</p> <p>High volume, diameter 16 mm 1 pack 50 pieces.</p> <p>Low volume with tapered removable tip, length 150 mm, soft. 1 pack 100 pieces.</p> |
| Use                  | Disposable hooked suction tip, placed in patient's mouth for continuous removal of saliva during procedures.                                                                      |
| Applicable Standards |                                                                                                                                                                                   |
| Note to Procurement  |                                                                                                                                                                                   |

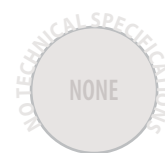

# Toothbrush

| Catalogue Number | Item Name         | Available on Transversal Contract | Contract Number or Code |
|------------------|-------------------|-----------------------------------|-------------------------|
| PHC-C-258        | Toothbrush: adult | RT296                             | RT296-05-027            |
| PHC-C-259        | Toothbrush: child | RT296                             | RT296-05-028            |
| PHC-C-260        | Toothbrush: baby  | RT296                             | RT296-05-029            |

|                      |                                                                                                                                                                                                                                                                                                                                                                                                                                                                                                                                                                                                              |
|----------------------|--------------------------------------------------------------------------------------------------------------------------------------------------------------------------------------------------------------------------------------------------------------------------------------------------------------------------------------------------------------------------------------------------------------------------------------------------------------------------------------------------------------------------------------------------------------------------------------------------------------|
| Description          | <p>Tooth brush dental adult, straight handle, thumb grip. Head length not exceeding 2.5 cm, flat brushing plane, soft medium textured nylon (0.08micron) round end bristles, pack of 12.</p> <p>Tooth brush dental, child, head length not exceeding 2.3cm with rounded corners in front, flat brushing plane, soft textured nylon (0.08micron) rounded bristles, flexible bended neck, pack of 12.</p> <p>Tooth brush dental baby, head length not exceeding 2cm with rounded corners in front, flat brushing plane, soft flexible grip, soft textured nylon (0.06micron) rounded bristles, pack of 12.</p> |
| Use                  |                                                                                                                                                                                                                                                                                                                                                                                                                                                                                                                                                                                                              |
| Applicable Standards |                                                                                                                                                                                                                                                                                                                                                                                                                                                                                                                                                                                                              |
| Note to Procurement  |                                                                                                                                                                                                                                                                                                                                                                                                                                                                                                                                                                                                              |

## Toothpaste: dental, fluoride

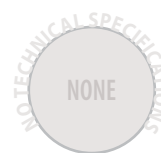

| Catalogue Number | Item Name                          | Available on Transversal Contract | Contract Number or Code |
|------------------|------------------------------------|-----------------------------------|-------------------------|
| PHC-C-261        | Toothpaste: dental, fluoride 25ml  | RT296                             | RT296-05-030            |
| PHC-C-262        | Toothpaste: dental, fluoride 50ml  | RT296                             | RT296-05-031            |
| PHC-C-263        | Toothpaste: dental, fluoride 100ml | RT296                             | RT296-05-032            |

|                      |                                                                                                                                                                                                                                                                                                                                                                                                                                                                                                                                                                       |
|----------------------|-----------------------------------------------------------------------------------------------------------------------------------------------------------------------------------------------------------------------------------------------------------------------------------------------------------------------------------------------------------------------------------------------------------------------------------------------------------------------------------------------------------------------------------------------------------------------|
| Description          | <p>Tooth paste dental, 25ml, active ingredient sodium fluoride and sodium lauryl sulphate not exceeding 1000ppm, ingredients be sugar free, stable in use and storage, pack of 12.</p> <p>Tooth paste dental, 50ml, active ingredient sodium fluoride and sodium lauryl sulphate not exceeding 1000ppm, ingredients be sugar free, stable in use and storage, pack of 12.</p> <p>Tooth paste dental, 100ml, active ingredient sodium fluoride and sodium lauryl sulphate not exceeding 1000ppm, ingredients be sugar free, stable in use and storage, pack of 12.</p> |
| Use                  |                                                                                                                                                                                                                                                                                                                                                                                                                                                                                                                                                                       |
| Applicable Standards |                                                                                                                                                                                                                                                                                                                                                                                                                                                                                                                                                                       |
| Note to Procurement  |                                                                                                                                                                                                                                                                                                                                                                                                                                                                                                                                                                       |

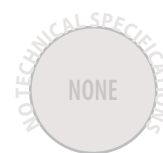

## Varnish: cavity liner

| Catalogue Number | Item Name             | Available on Transversal Contract | Contract Number or Code |
|------------------|-----------------------|-----------------------------------|-------------------------|
| PHC-C-264        | Varnish: cavity liner | RT296                             | RT296-02-199            |

|                      |                                                                |
|----------------------|----------------------------------------------------------------|
| Description          | Cavity lining, dental: Vanish for cavity seal: 1 bottle, 15ml. |
| Use                  | For sealing of cavity in preparation for filling.              |
| Applicable Standards |                                                                |
| Note to Procurement  |                                                                |



# Rehabilitation

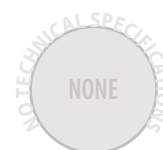

## Batteries: hearing aid

| Catalogue Number | Item Name                       | Available on Transversal Contract | Contract Number or Code |
|------------------|---------------------------------|-----------------------------------|-------------------------|
| PHC-C-265        | Batteries: hearing aid size 675 | RT274-2018ME                      | 26111701-00016          |
| PHC-C-266        | Batteries: hearing aid size 312 | RT274-2018ME                      | 26111701-00017          |
| PHC-C-267        | Batteries: hearing aid size 13  | RT274-2018ME                      | 26111701-00018          |
| PHC-C-268        | Batteries: hearing aid size 10  | RT274-2018ME                      | 26111701-00019          |

|                      |                                                |
|----------------------|------------------------------------------------|
| Description          | Batteries for hearing aids (non-rechargeable). |
| Use                  | Replacement batteries for hearing aids.        |
| Applicable Standards |                                                |
| Note to Procurement  |                                                |

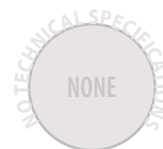

## Bicarbonate of soda: sachets

| Catalogue Number | Item Name                    | Available on Transversal Contract | Contract Number or Code |
|------------------|------------------------------|-----------------------------------|-------------------------|
| PHC-C-269        | Bicarbonate of soda: sachets | No                                |                         |

|                      |                                           |
|----------------------|-------------------------------------------|
| Description          | Prepacked sachets of bicarbonate of soda. |
| Use                  | Treatment: cerumen management.            |
| Applicable Standards | Bicarbonate of Soda BP.                   |
| Note to Procurement  |                                           |



## Breadboard: one-handed

| Catalogue Number | Item Name              | Available on Transversal Contract | Contract Number or Code |
|------------------|------------------------|-----------------------------------|-------------------------|
| PHC-C-270        | Breadboard: one-handed | No                                |                         |

|                      |                                                                                                                                                                                                                                                          |
|----------------------|----------------------------------------------------------------------------------------------------------------------------------------------------------------------------------------------------------------------------------------------------------|
| Description          | A wooden or Perspex chopping board with two nails protruding through the board at one corner, with a border edge of at least 2cm high on two sides of the same corner.                                                                                   |
| Use                  | This is for spearing a slice of bread to apply butter with one hand, or to chop vegetables and fruit using one hand.<br>NB: this could be manufactured at facility level. To rehabilitate and enable food preparation activities in hemiplegic patients. |
| Applicable Standards |                                                                                                                                                                                                                                                          |
| Note to Procurement  | Metal needs to be a type which is largely rust resistant.                                                                                                                                                                                                |

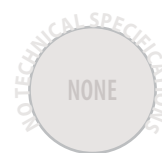

## Cable ties: nylon,

| Catalogue Number | Item Name                 | Available on Transversal Contract | Contract Number or Code |
|------------------|---------------------------|-----------------------------------|-------------------------|
| PHC-C-271        | Cable ties: nylon, medium | No                                |                         |
| PHC-C-272        | Cable ties: nylon, long   | No                                |                         |
|                  |                           |                                   |                         |

|                      |                                                                                                                                                                                                                                     |
|----------------------|-------------------------------------------------------------------------------------------------------------------------------------------------------------------------------------------------------------------------------------|
| Description          | Medium Self-locking cable ties, 200mm long by 5mm wide, minimum 22kg tensile strength.<br>Long Self-locking cable ties, 400mm long by 7,5mm wide, minimum 50kg tensile strength.<br>UV resistant. One-piece head with locking pawl. |
| Use                  | For fixing and manufacturing assistive devices.                                                                                                                                                                                     |
| Applicable Standards |                                                                                                                                                                                                                                     |
| Note to Procurement  | Equal quantities black and white when ordering.                                                                                                                                                                                     |



## Cardboard: A4, various colours

| Catalogue Number | Item Name                       | Available on Transversal Contract | Contract Number or Code |
|------------------|---------------------------------|-----------------------------------|-------------------------|
| PHC-C-273        | Cardboard,; A4, various colours | No                                |                         |

|                      |                                                                                                                                                                                                         |
|----------------------|---------------------------------------------------------------------------------------------------------------------------------------------------------------------------------------------------------|
| Description          | Various colours of A4 cardboard sheets in packs of 100.                                                                                                                                                 |
| Use                  | Manufacture communication boards and visual scheduling boards, as well as in fine motor activities for children with motor, sensory, cognitive or behavioural disorders.                                |
| Applicable Standards |                                                                                                                                                                                                         |
| Note to Procurement  | It is recommended that this be purchased with associated consumables such as crayons, pencils, scissors, laminating paper and glue, and with items such as a laminator and software such as Boardmaker. |

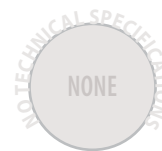

## Coloured pencils, pens, crayons

| Catalogue Number | Item Name                       | Available on Transversal Contract | Contract Number or Code |
|------------------|---------------------------------|-----------------------------------|-------------------------|
| PHC-C-274        | Coloured pencils, pens, crayons | No                                |                         |

|                      |                                                                                                                      |
|----------------------|----------------------------------------------------------------------------------------------------------------------|
| Description          | Assorted coloured writing instruments.                                                                               |
| Use                  | To assess and treat children with literacy problems, emotional-behavioural problems, language and motor delays, etc. |
| Applicable Standards |                                                                                                                      |
| Note to Procurement  |                                                                                                                      |

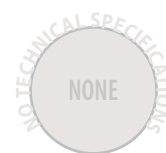

## Curette: cerumen, lighted

| Catalogue Number | Item Name                                    | Available on Transversal Contract | Contract Number or Code |
|------------------|----------------------------------------------|-----------------------------------|-------------------------|
| PHC-C-275        | Curette: cerumen, lighted, replacement cures | RT274-2014ME                      | RT274-12-017ME          |
| PHC-C-276        | Curette: cerumen, lighted, replacement light | RT274-2014ME                      | RT274-12-016ME          |

|                      |                                                                                                          |
|----------------------|----------------------------------------------------------------------------------------------------------|
| Description          | Replacement cures for illuminated cerumen curette.<br>Replacement light for illuminated cerumen curette. |
| Use                  | Spare cures and light.                                                                                   |
| Applicable Standards |                                                                                                          |
| Note to Procurement  | In series with RT274-12-014ME.                                                                           |

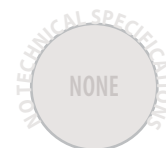

## Cushion: wheelchair

| Catalogue Number | Item Name                             | Available on Transversal Contract | Contract Number or Code |
|------------------|---------------------------------------|-----------------------------------|-------------------------|
| PHC-C-277        | Wedge based, thin foam, positioner    | RT233-2016                        | 2.2.1.1 A4a             |
| PHC-C-278        | Wedge based, thick pressure care foam | RT233-2016                        | 2.2.1.1 A2a             |

|                      |                                                                                                                                                                                                                                                                                                                                                                                                                                                                                                                                                                                                                                                                                                                                                                                                                                                                                                    |
|----------------------|----------------------------------------------------------------------------------------------------------------------------------------------------------------------------------------------------------------------------------------------------------------------------------------------------------------------------------------------------------------------------------------------------------------------------------------------------------------------------------------------------------------------------------------------------------------------------------------------------------------------------------------------------------------------------------------------------------------------------------------------------------------------------------------------------------------------------------------------------------------------------------------------------|
| Description          | <p>2.2.1.1 A4a Wedge based, thin foam, positioner with contoured base, extended with no cover, in sizes 46cm, 41cm, 36cm and 30cm, all 50cm long, 4cm high at the rear, 9cm in front.</p> <p>A minimum of 5 per size should be kept in stock at any given time, at the PHC team base. At the clinics themselves, where seating is offered, 2 per size at any given time would be adequate.</p> <p>Each of the stock wheelchairs kept at the clinic should have a cushion and cover.</p> <p>2.2.1.1 A2a. Wedge based, thick pressure care foam cushion with contoured base, extended with no cover, in sizes 46cm, 41cm, 36cm and 30cm, all 50cm long, 4cm high at the rear, 9cm in front.</p> <p>A minimum of 5 per size should be kept in stock at any given time, at the PHC team base. At the clinics themselves, where seating is offered, 2 per size at any given time would be adequate.</p> |
| Use                  | Seat cushions permit adjustments for postural asymmetries or lack of postural control, and help prevent pressure sores.                                                                                                                                                                                                                                                                                                                                                                                                                                                                                                                                                                                                                                                                                                                                                                            |
| Applicable Standards |                                                                                                                                                                                                                                                                                                                                                                                                                                                                                                                                                                                                                                                                                                                                                                                                                                                                                                    |
| Note to Procurement  |                                                                                                                                                                                                                                                                                                                                                                                                                                                                                                                                                                                                                                                                                                                                                                                                                                                                                                    |



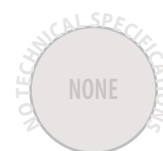

## Cushion covers: wheelchair

| Catalogue Number | Item Name                              | Available on Transversal Contract | Contract Number or Code |
|------------------|----------------------------------------|-----------------------------------|-------------------------|
| PHC-C-279        | Cushion cover: waterproof, stretchable | RT233                             | 42192208-00348          |
| PHC-C-280        | Cushion cover: basic, stretchable      | RT233                             | 42192208-00326          |

|                      |                                                                                                                                                                                                                                                                                                                                                                                                                                                                                                            |
|----------------------|------------------------------------------------------------------------------------------------------------------------------------------------------------------------------------------------------------------------------------------------------------------------------------------------------------------------------------------------------------------------------------------------------------------------------------------------------------------------------------------------------------|
| Description          | <p>Cushion cover, waterproof, stretchable. Stock should include a MINIMUM of 4 of each size, for at least 10", 12" with 30cm seat depth, 12" with 40cm seat depth, 14", 16", 18". 20" could be kept as a minimum of 2 on hand at any point in time.</p> <p>Cushion cover, basic, stretchable. Stock should include a MINIMUM of 4 of each size, for at least 10", 12" with 30cm seat depth, 12" with 40cm seat depth, 14", 16", 18". 20" could be kept as a minimum of 2 on hand at any point in time.</p> |
| Use                  |                                                                                                                                                                                                                                                                                                                                                                                                                                                                                                            |
| Applicable Standards |                                                                                                                                                                                                                                                                                                                                                                                                                                                                                                            |
| Note to Procurement  |                                                                                                                                                                                                                                                                                                                                                                                                                                                                                                            |



## Ear mould impression material and scoop

| Catalogue Number | Item Name                               | Available on Transversal Contract | Contract Number or Code |
|------------------|-----------------------------------------|-----------------------------------|-------------------------|
| PHC-C-281        | Ear mould impression material and scoop | RT274-2018ME                      | 42143504-00004          |
| PHC-C-282        | Ear mould impression material catalyst  | RT274-2018ME                      | 42143504-00005          |

|                      |                                                                                                                                                |
|----------------------|------------------------------------------------------------------------------------------------------------------------------------------------|
| Description          | Silicon based impression material (800g tub) with tube of catalyst, 40 shore.<br>Tube of catalyst for ear mould impression material, 20g tube. |
| Use                  | To make ear impressions for hearing aid fitment.                                                                                               |
| Applicable Standards |                                                                                                                                                |
| Note to Procurement  | Item RT274-10-005ME and 006ME must be awarded as a series.                                                                                     |



## Ear mould impression Otolight: replacement globe

| Catalogue Number | Item Name                   | Available on Transversal Contract | Contract Number or Code |
|------------------|-----------------------------|-----------------------------------|-------------------------|
| PHC-C-283        | Otolight: replacement globe | RT274-2018                        | 42143504-00011          |

|                      |                                                                                                 |
|----------------------|-------------------------------------------------------------------------------------------------|
| Description          | Lightbulb replacement for ear mould impressions Otolight.                                       |
| Use                  |                                                                                                 |
| Applicable Standards |                                                                                                 |
| Note to Procurement  | Must be compatible with RT274-11-004ME. Item RT274-11-007ME to 009 must be awarded as a series. |



## Ear mould impression Otolight: replacement tips

| Catalogue Number | Item Name                  | Available on Transversal Contract | Contract Number or Code |
|------------------|----------------------------|-----------------------------------|-------------------------|
| PHC-C-284        | Otolight: replacement tips | RT274-2018                        | 42143504-00012          |

|                      |                                                                                                                                                                                                                                                                    |
|----------------------|--------------------------------------------------------------------------------------------------------------------------------------------------------------------------------------------------------------------------------------------------------------------|
| Description          | Replacement tapered tips of Otolight for ear mould impressions.<br>Hard transparent plastic tips for Otolight that is 0-1.5cm in diameter at the base with a narrow protrusion of 3-4cm in length and approximately 1mm in diameter with a rounded tip. Pack of 2. |
| Use                  |                                                                                                                                                                                                                                                                    |
| Applicable Standards |                                                                                                                                                                                                                                                                    |
| Note to Procurement  | Must be compatible with RT274-11-004ME.                                                                                                                                                                                                                            |

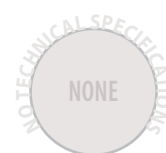

## Exercise band: latex

| Catalogue Number | Item Name                                  | Available on Transversal Contract | Contract Number or Code |
|------------------|--------------------------------------------|-----------------------------------|-------------------------|
| PHC-C-288        | Exercise band: latex, very light 1-1,5kg   | No                                |                         |
| PHC-C-289        | Exercise band: latex, light 1,5-2kg        | No                                |                         |
| PHC-C-290        | Exercise band: latex, medium 2-2,7kg       | No                                |                         |
| PHC-C-291        | Exercise band: latex, heavy 2,7-3,5kg      | No                                |                         |
| PHC-C-292        | Exercise band: latex, very heavy 3,5-4,5kg | No                                |                         |

|                      |                                                                                                          |
|----------------------|----------------------------------------------------------------------------------------------------------|
| Description          | Latex exercise band, elasticated, of varied resistances. Rolls of 46m.                                   |
| Use                  | For resistance training in musculoskeletal conditions. Provides resistance throughout range of movement. |
| Applicable Standards |                                                                                                          |
| Note to Procurement  |                                                                                                          |



## Feeding cup

| Catalogue Number | Item Name    | Available on Transversal Contract | Contract Number or Code |
|------------------|--------------|-----------------------------------|-------------------------|
| PHC-C-293        | Cup: feeding | RT275-2016                        | 85122108-00183          |

|                      |                                                                                                                                                                   |
|----------------------|-------------------------------------------------------------------------------------------------------------------------------------------------------------------|
| Description          | Cup, feeding, specialized, transition, with spout without handles, autoclavable, non-spill valve, durable hard plastic, transparent, bpa free, size: paediatric . |
| Use                  | For addressing latching and feeding problems in neonates and infants, and dysphagia in adults.                                                                    |
| Applicable Standards |                                                                                                                                                                   |
| Note to Procurement  |                                                                                                                                                                   |



## Feeding spoon

| Catalogue Number | Item Name      | Available on Transversal Contract | Contract Number or Code |
|------------------|----------------|-----------------------------------|-------------------------|
| PHC-C-294        | Spoon: feeding | RT275-2016                        | 85122108-00178          |

|                      |                                                                                                                                                                                                                                                                                                                                                                                                                        |
|----------------------|------------------------------------------------------------------------------------------------------------------------------------------------------------------------------------------------------------------------------------------------------------------------------------------------------------------------------------------------------------------------------------------------------------------------|
| Description          | <p>Spoon, feeding, specialized, premature, paediatrics infants aged 4 months and older, shallow bowl of spoon, hard plastic, durable, auto-cleavable, size: 1,5cm bowl width of spoon.</p> <p>The spoon head needs to be at an angle suitable for feeding for each individual client i.e. 0-30 degrees, handle padded with non-slip material with an adjustable circumference that allows for grading in the grip.</p> |
| Use                  | For addressing feeding problems in patients with neurological impairments.                                                                                                                                                                                                                                                                                                                                             |
| Applicable Standards |                                                                                                                                                                                                                                                                                                                                                                                                                        |
| Note to Procurement  |                                                                                                                                                                                                                                                                                                                                                                                                                        |



## Ferrule: rubber

| Catalogue Number | Item Name             | Available on Transversal Contract | Contract Number or Code |
|------------------|-----------------------|-----------------------------------|-------------------------|
| PHC-C-295        | Ferrule: rubber, 16mm | No                                |                         |
| PHC-C-296        | Ferrule: rubber, 22mm | No                                |                         |
| PHC-C-297        | Ferrule: rubber, 25mm | No                                |                         |

|                      |                                                                                                         |
|----------------------|---------------------------------------------------------------------------------------------------------|
| Description          | Rubber end stoppers for walking sticks, elbow crutches, axilla crutches, walking frames and quadropods. |
| Use                  | To prevent slips and falls in clients using walking sticks, quadropods, crutches or frames.             |
| Applicable Standards |                                                                                                         |
| Note to Procurement  |                                                                                                         |



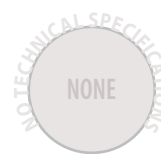

## Foam: EVA

| Catalogue Number | Item Name | Available on Transversal Contract | Contract Number or Code |
|------------------|-----------|-----------------------------------|-------------------------|
| PHC-C-298        | EVA foam  | No                                |                         |

|                      |                                                                                                                                                                                                                                                                                              |
|----------------------|----------------------------------------------------------------------------------------------------------------------------------------------------------------------------------------------------------------------------------------------------------------------------------------------|
| Description          | Very high density foam for padding areas of a device with exceptional wear and tear. Colour: black.                                                                                                                                                                                          |
| Use                  | For manufacturing postural support devices and other assistive devices.<br>Must be used with an appropriate cutting tool such as a Stanley knife or hacksaw blade.<br>Sizes 1mm, 2mm, 3mm, 6mm, 8mm, 10mm, 20mm, 30mm, 40mm, 50mm.<br>Sheet dimensions: 2400mm x 1200mm, Hard 2000 x 1000mm. |
| Applicable Standards |                                                                                                                                                                                                                                                                                              |
| Note to Procurement  | Preferably an adhesive back to the sheet.                                                                                                                                                                                                                                                    |

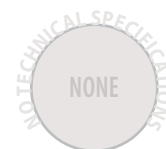

## Foam: high-density, 36/20

| Catalogue Number | Item Name                        | Available on Transversal Contract | Contract Number or Code |
|------------------|----------------------------------|-----------------------------------|-------------------------|
| PHC-C-299        | Foam: high-density, 36/20, 2,5cm | No                                |                         |
| PHC-C-300        | Foam: high-density, 36/20, 5cm   | No                                |                         |
|                  |                                  |                                   |                         |

|                      |                                                                                                                                                                                                                                                                                                                                                                                                               |
|----------------------|---------------------------------------------------------------------------------------------------------------------------------------------------------------------------------------------------------------------------------------------------------------------------------------------------------------------------------------------------------------------------------------------------------------|
| Description          | High density foam 36/20, hardness factor 18-21.6, density range 32.1-40kg/m cubed, in sheets 5cm and 2.5cm thickness.                                                                                                                                                                                                                                                                                         |
| Use                  | For manufacturing postural support devices and other assistive devices. Therapists should have access to ongoing training in basic, intermediate and advanced seating to improve quality of seating and limit clinical adverse events/secondary complications. Tools such as the electric foam cutter and consumables such as cushion covers and contact adhesive glue should be available with this product. |
| Applicable Standards |                                                                                                                                                                                                                                                                                                                                                                                                               |
| Note to Procurement  |                                                                                                                                                                                                                                                                                                                                                                                                               |



## Foam: HD compressed 1300

| Catalogue Number | Item Name                             | Available on Transversal Contract | Contract Number or Code |
|------------------|---------------------------------------|-----------------------------------|-------------------------|
| PHC-C-301        | Foam: HD compressed 1300, 2,5cm thick | No                                |                         |
| PHC-C-302        | Foam: HD compressed 1300, 5cm thick   | No                                |                         |

|                      |                                                                                                                                                                                                                                                                                                                                                                                                               |
|----------------------|---------------------------------------------------------------------------------------------------------------------------------------------------------------------------------------------------------------------------------------------------------------------------------------------------------------------------------------------------------------------------------------------------------------|
| Description          | HD compressed (reconstituted, flexible PU) foam 1300, hardness factor 52-63, density 130+10% kg/m cubed (SANS 642-1976) in sheets 5cm and 2.5cm thickness.                                                                                                                                                                                                                                                    |
| Use                  | For manufacturing postural support devices and other assistive devices. Therapists should have access to ongoing training in basic, intermediate and advanced seating to improve quality of seating and limit clinical adverse events/secondary complications. Tools such as the electric foam cutter and consumables such as cushion covers and contact adhesive glue should be available with this product. |
| Applicable Standards | SANS 642-1976.                                                                                                                                                                                                                                                                                                                                                                                                |
| Note to Procurement  |                                                                                                                                                                                                                                                                                                                                                                                                               |

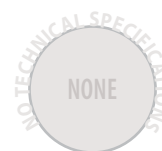

## Masonite

| Catalogue Number | Item Name      | Available on Transversal Contract | Contract Number or Code |
|------------------|----------------|-----------------------------------|-------------------------|
| PHC-C-303        | Masonite board | No                                |                         |

|                      |                                                                                                                                                  |
|----------------------|--------------------------------------------------------------------------------------------------------------------------------------------------|
| Description          | Masonite board standard brown or white with smooth finish, semi moisture-resistant. Thickness 3mm, 3.2mm, 4.mm, 6.4mm. Sheet size 2440 x 1220mm. |
| Use                  | For manufacturing assistive devices.                                                                                                             |
| Applicable Standards |                                                                                                                                                  |
| Note to Procurement  |                                                                                                                                                  |

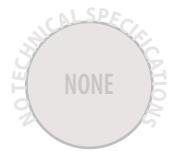

## Oil: arnica

| Catalogue Number | Item Name   | Available on Transversal Contract | Contract Number or Code |
|------------------|-------------|-----------------------------------|-------------------------|
| PHC-C-304        | Oil: arnica | No                                |                         |

|                      |                                                                                                       |
|----------------------|-------------------------------------------------------------------------------------------------------|
| Description          | Arnica oil in 1l containers.                                                                          |
| Use                  | For massage when addressing soft tissue restrictions in musculoskeletal, orthopaedic and neuro cases. |
| Applicable Standards |                                                                                                       |
| Note to Procurement  |                                                                                                       |



## Otostops

| Catalogue Number | Item Name    | Available on Transversal Contract | Contract Number or Code |
|------------------|--------------|-----------------------------------|-------------------------|
| PHC-C-285        | Otostop 5mm  | RT274-2018                        | 42182005-00005          |
| PHC-C-286        | Otostop 10mm | RT274-2018                        | 42182005-00006          |
| PHC-C-287        | Otostop 13mm | RT274-2018                        | 42182005-00007          |

|                      |  |
|----------------------|--|
| Description          |  |
| Use                  |  |
| Applicable Standards |  |
| Note to Procurement  |  |



## Paper: print-out, tympanometer

| Catalogue Number | Item Name                      | Available on Transversal Contract | Contract Number or Code |
|------------------|--------------------------------|-----------------------------------|-------------------------|
| PHC-C-305        | Paper: print-out, tympanometer | No                                |                         |

|                      |                                                                    |
|----------------------|--------------------------------------------------------------------|
| Description          | Paper for printing out tympanometry report.                        |
| Use                  | Produce hard-copy report of tympanogram.                           |
| Applicable Standards |                                                                    |
| Note to Procurement  | Must be compatible with internal printer attached to tympanometer. |

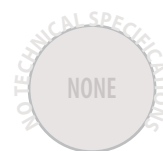

## Pelvic straps

| Catalogue Number | Item Name               | Available on Transversal Contract | Contract Number or Code |
|------------------|-------------------------|-----------------------------------|-------------------------|
| PHC-C-339        | Pelvic strap: basic 5cm | RT233                             | 2.1.1                   |
| PHC-C-340        | Pelvic strap: basic 3cm | RT233                             | 2.1.2                   |

|                      |                                                                                                                                                                                                                                                                                    |
|----------------------|------------------------------------------------------------------------------------------------------------------------------------------------------------------------------------------------------------------------------------------------------------------------------------|
| Description          | <p>2.1.1 Pelvic straps, basic, adjustable, with D ring fitting, 5cm wide: a minimum of 10 in stock at PHC team base at any time.</p> <p>2.1.2 Pelvic straps, basic, adjustable, with D ring fitting, 3cm wide: a minimum of 10 in stock at PHC team base at any point in time.</p> |
| Use                  | Stabilise wheelchair user.                                                                                                                                                                                                                                                         |
| Applicable Standards |                                                                                                                                                                                                                                                                                    |
| Note to Procurement  |                                                                                                                                                                                                                                                                                    |





## Pressure garment material: elastonet

| Catalogue Number | Item Name                                        | Available on Transversal Contract | Contract Number or Code |
|------------------|--------------------------------------------------|-----------------------------------|-------------------------|
| PHC-C-306        | Pressure garment material: elastonet, beige      | No                                |                         |
| PHC-C-307        | Pressure garment material: elastonet, white      |                                   |                         |
| PHC-C-308        | Pressure garment material: elastonet, dark brown |                                   |                         |

|                      |                                                                                                                     |
|----------------------|---------------------------------------------------------------------------------------------------------------------|
| Description          | 85% polyester and 15% spandex material, 15m or 30m roll in beige, white and dark brown.                             |
| Use                  | Elasticated material used to manufacture pressure garments to improve scar healing and to prevent keloid formation. |
| Applicable Standards |                                                                                                                     |
| Note to Procurement  | It is recommended that access to a sewing machine is guaranteed before purchasing this product.                     |



# Sewing kit

| Catalogue Number | Item Name  | Available on Transversal Contract | Contract Number or Code |
|------------------|------------|-----------------------------------|-------------------------|
| PHC-C-309        | Sewing kit | No                                |                         |

|                      |                                                                                                                                                                                                                                                                                                                                                                                                                                                                                                                                                                                                                                                                                                                                                                                                                                                                                                                                                                                                                                                                                                                                        |
|----------------------|----------------------------------------------------------------------------------------------------------------------------------------------------------------------------------------------------------------------------------------------------------------------------------------------------------------------------------------------------------------------------------------------------------------------------------------------------------------------------------------------------------------------------------------------------------------------------------------------------------------------------------------------------------------------------------------------------------------------------------------------------------------------------------------------------------------------------------------------------------------------------------------------------------------------------------------------------------------------------------------------------------------------------------------------------------------------------------------------------------------------------------------|
| Description          | <p>High quality hand sewing kit including awl, thimble, unpicker, pins, needles of various sizes including high quality heavy duty leather needles and sewing thread including cotton and thread for sewing leather, webbing and neoprene.</p> <p>Normal needles, Upholstery heavy long needles – straight 3”-12” long curved and 1.5” - 6” long, Tapestry – large eye, Leather, Darning blunt tip large eye, Beading, Embroidery, Sharp needle: size 5-10.</p> <p>Sewing machine needle suitable to use on various materials used during rehabilitation.</p> <p>Wedge point (leather, vinyl) – 14/90, 16/100.</p> <p>Ball point ( spandex single knit) –14/90, 10/70, 12/80.</p> <p>Denim jeans – 16/100.</p> <p>Regular point (towelling, flannel) – 16/100, 18/110, 14/90, 11/80, 9/70.</p> <p>Sewing thread: Normal cotton: Rayon thread 40wt and 30wt, 100% spun Polyester thread , Cotton 100% cotton embroidery thread, size 30g, 50wt, Heavy duty nylon thread for upholstery, canvas and webbing – in variety of sizes 15, 33, 46.</p> <p>v-30: 30 tex, x denier 300 x weight 33g.</p> <p>v46: tex 45 x denier 460 x 22g.</p> |
| Use                  | For manufacture of assistive devices.                                                                                                                                                                                                                                                                                                                                                                                                                                                                                                                                                                                                                                                                                                                                                                                                                                                                                                                                                                                                                                                                                                  |
| Applicable Standards |                                                                                                                                                                                                                                                                                                                                                                                                                                                                                                                                                                                                                                                                                                                                                                                                                                                                                                                                                                                                                                                                                                                                        |
| Note to Procurement  |                                                                                                                                                                                                                                                                                                                                                                                                                                                                                                                                                                                                                                                                                                                                                                                                                                                                                                                                                                                                                                                                                                                                        |



## Splinting material: thermoplastic sheets

| Catalogue Number | Item Name                  | Available on Transversal Contract | Contract Number or Code |
|------------------|----------------------------|-----------------------------------|-------------------------|
| PHC-C-310        | Thermoplastic sheet: 1,6mm | No                                |                         |
| PHC-C-311        | Thermoplastic sheet: 2,0mm |                                   |                         |
| PHC-C-312        | Thermoplastic sheet: 2,4mm |                                   |                         |
| PHC-C-313        | Thermoplastic sheet: 2,5mm |                                   |                         |
| PHC-C-314        | Thermoplastic sheet: 3,2mm |                                   |                         |
| PHC-C-315        | Thermoplastic sheet: 4,8mm |                                   |                         |

|                      |                                                                                                                                                                                                                                                                                                                                                                                                                                                                                                                                                                                                                                                                                                                                                                                                              |
|----------------------|--------------------------------------------------------------------------------------------------------------------------------------------------------------------------------------------------------------------------------------------------------------------------------------------------------------------------------------------------------------------------------------------------------------------------------------------------------------------------------------------------------------------------------------------------------------------------------------------------------------------------------------------------------------------------------------------------------------------------------------------------------------------------------------------------------------|
| Description          | Thermoplastic material for moulding splints for upper and lower limbs, in various thicknesses. Sheet size 45cm x 60cm.                                                                                                                                                                                                                                                                                                                                                                                                                                                                                                                                                                                                                                                                                       |
| Use                  | <p>Manufacture of custom splints and supports.</p> <p>Thermoplastic properties, mouldable after 35 seconds at 70-75 °C.</p> <p>Working time for 1.6mm is 1-2min.</p> <p>Working time for 2.4mm is 2-3 minutes.</p> <p>Working time for 3.2mm is 4-6 minutes.</p> <p>Working time 4.8mm is 7-8 minutes.</p> <p>Translucent when heated, allowing identification of landmarks for positioning and pressure points for providing maximum comfort.</p> <p>Stretches easily with excellent drapability, conforming well to contours.</p> <p>100% memory allows repeated reheating and economical splint revisions.</p> <p>Perforations provide superior ventilation assisting normal evaporation while maintaining material strength. Options for solid or perforated should be available for each thickness.</p> |
| Applicable Standards |                                                                                                                                                                                                                                                                                                                                                                                                                                                                                                                                                                                                                                                                                                                                                                                                              |
| Note to Procurement  | It is recommended that this product be purchased with a splinting pan or electric frying pan, heat gun, Stanley knife, heavy duty splinting scissors, and Velcro.                                                                                                                                                                                                                                                                                                                                                                                                                                                                                                                                                                                                                                            |

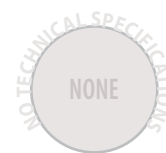

## Splinting material: thermoplastic tape

| Catalogue Number | Item Name               | Available on Transversal Contract | Contract Number or Code |
|------------------|-------------------------|-----------------------------------|-------------------------|
| PHC-C-316        | Thermoplastic tape: 3cm | No                                |                         |
| PHC-C-317        | Thermoplastic tape: 6cm | No                                |                         |
|                  |                         |                                   |                         |

|                      |                                                                                                                                                                                                                                                                                                                                                                                                                                                                                                                                                                                                                                                                                                                                                                                                                                                                                                                                                                                                                                                                                                                                                                                                                                                                                                                                                                                                                                                                             |
|----------------------|-----------------------------------------------------------------------------------------------------------------------------------------------------------------------------------------------------------------------------------------------------------------------------------------------------------------------------------------------------------------------------------------------------------------------------------------------------------------------------------------------------------------------------------------------------------------------------------------------------------------------------------------------------------------------------------------------------------------------------------------------------------------------------------------------------------------------------------------------------------------------------------------------------------------------------------------------------------------------------------------------------------------------------------------------------------------------------------------------------------------------------------------------------------------------------------------------------------------------------------------------------------------------------------------------------------------------------------------------------------------------------------------------------------------------------------------------------------------------------|
| Description          | <p>Low temperature thermoplastic type material with a textile-like feel.</p> <p>Rolls of 300cm length, in widths of 3cm or 6cm.</p> <p>Density 20g/m.</p>                                                                                                                                                                                                                                                                                                                                                                                                                                                                                                                                                                                                                                                                                                                                                                                                                                                                                                                                                                                                                                                                                                                                                                                                                                                                                                                   |
| Use                  | <p>Activation temperature 65 °C, with a minimum activation time of 1 minute and a maximum activation time of 30 minutes.</p> <p>Possible activation sources are: Suspan water bath, dry heater, heating plate, microwave oven and heat gun. The activation time depends on the heat source and the product size, and varies from 30 seconds to 5 minutes: 1. Water bath: 65°C: 1 min. 2. Dry heater or heating plate: 1-5 min 3. Microwave oven: 500W: 2-2,5 min 4. Heat gun: 1-4 seconds for reactivation of tape. The heat gun is not meant to be used as heat source to activate the total length of the tape before moulding it onto the patient.</p> <p>Drying time 10 seconds.</p> <p>Moulding time 1 minute.</p> <p>Hardening time minimum 5 minutes.</p> <p>Options for solid or perforated.</p> <p>Excellent elasticity in two directions.</p> <p>Adaptable when needed.</p> <p>Thin and breathable fabric.</p> <p>Easy to cut.</p> <p>Straps, orthosis accessories or reinforcements can also be stuck to the orthosis using the self-adhesive properties of the tape: self-adhesive capacity, especially when dry heated.</p> <p>Lightweight. Allows ventilation. Prevents maceration of the skin.</p> <p>Tape roll allows to use circumferential wrapping and moulding technique.</p> <p>Low to moderate memory. The material can be reactivated and unwrapped if not totally pressed together. This allows small corrections to the orthosis if necessary.</p> |
| Applicable Standards |                                                                                                                                                                                                                                                                                                                                                                                                                                                                                                                                                                                                                                                                                                                                                                                                                                                                                                                                                                                                                                                                                                                                                                                                                                                                                                                                                                                                                                                                             |
| Note to Procurement  |                                                                                                                                                                                                                                                                                                                                                                                                                                                                                                                                                                                                                                                                                                                                                                                                                                                                                                                                                                                                                                                                                                                                                                                                                                                                                                                                                                                                                                                                             |

# Towelling

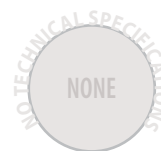

| Catalogue Number | Item Name   | Available on Transversal Contract | Contract Number or Code |
|------------------|-------------|-----------------------------------|-------------------------|
| PHC-C-318        | Towelling   | RT 60-1-2017                      | 11161608-00002          |
| PHC-C-319        | Hand towels | RT26-2017                         | 52121701-00002          |
| PHC-C-320        | Face cloth  | RT26-2017                         | 52121703-00001          |

|                      |                                                                                                                                                                                                                                |
|----------------------|--------------------------------------------------------------------------------------------------------------------------------------------------------------------------------------------------------------------------------|
| Description          | <p>Towelling material of various thicknesses and sizes in a variety of colours.<br/>69cm wide. Minimum mass 260g/m<sup>2</sup>. Colour blue.<br/>Hand towel 55cm x 110cm Royal blue.<br/>Face cloth 25cm x25cm Royal blue.</p> |
| Use                  | <p>Manufacturing of assistive devices such as drooling cuffs.</p>                                                                                                                                                              |
| Applicable Standards | <p>SANS 1401: 2007 EDITION 2.1, PART 5, TYPE T36 OR SANS: 1613 TYPE DK270 OR DCR275.</p>                                                                                                                                       |
| Note to Procurement  | <p>If it is impossible to buy rolls of toweling material then purchasing bulk facecloths and hand towels will be sufficient.</p>                                                                                               |



## Varnish: wood

| Catalogue Number | Item Name     | Available on Transversal Contract | Contract Number or Code |
|------------------|---------------|-----------------------------------|-------------------------|
| PHC-C-321        | Varnish: wood | No                                |                         |

|                      |                                                                                                                                    |
|----------------------|------------------------------------------------------------------------------------------------------------------------------------|
| Description          | Wood varnish, clear, in 5l container. Oil-based, quick-drying.                                                                     |
| Use                  | Manufacturing advanced paper technique posture chairs, trays, tables, etc., as well as treating other wood-made assistive devices. |
| Applicable Standards |                                                                                                                                    |
| Note to Procurement  | Paintbrush, 2.5, 5 and 10cm width, with appropriate solvent.                                                                       |



## Velcro: circle, self-adhesive

| Catalogue Number | Item Name                                         | Available on Transversal Contract | Contract Number or Code |
|------------------|---------------------------------------------------|-----------------------------------|-------------------------|
| PHC-C-322        | Velcro: hook, circle, self-adhesive, 1cm diameter | RT275-2016                        | 85122108-00010          |
| PHC-C-323        | Velcro: loop, circle, self-adhesive, 1cm diameter | RT275-2016                        | 85122108-00011          |

|                      |                                                                                                                                                            |
|----------------------|------------------------------------------------------------------------------------------------------------------------------------------------------------|
| Description          | 25m roll of white hook Velcro circles, 1cm diameter, with adhesive backing.<br>25m roll of white loop Velcro circles, 1cm diameter, with adhesive backing. |
| Use                  | Making picture-based alternative communication systems.                                                                                                    |
| Applicable Standards |                                                                                                                                                            |
| Note to Procurement  |                                                                                                                                                            |

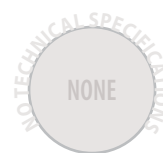

## Velcro: loop, 5cm width, 50m roll

| Catalogue Number | Item Name                         | Available on Transversal Contract | Contract Number or Code |
|------------------|-----------------------------------|-----------------------------------|-------------------------|
| PHC-C-324        | Velcro: loop, 5cm width, 50m roll | No                                |                         |
| PHC-C-325        | Velcro: hook, 5cm width, 50m roll | No                                |                         |

|                      |                                                                                                                                                      |
|----------------------|------------------------------------------------------------------------------------------------------------------------------------------------------|
| Description          | 50m roll of loop Velcro, 5cm width, in white/beige/black.<br>50m roll of hook Velcro, 5cm width, in white/beige/black.                               |
| Use                  | Making a variety of assistive devices and splints. Heavy duty scissors should be available, as should appropriate leather sewing needles and thread. |
| Applicable Standards |                                                                                                                                                      |
| Note to Procurement  | Should come with options of adhesive backs or non-adhesive backs. Procure equal quantities of white, beige and black.                                |



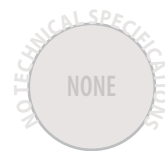

## Washboard: one-handed

| Catalogue Number | Item Name             | Available on Transversal Contract | Contract Number or Code |
|------------------|-----------------------|-----------------------------------|-------------------------|
| PHC-C-326        | Washboard: one-handed | No                                |                         |

|                      |                                                                                                                                                                                        |
|----------------------|----------------------------------------------------------------------------------------------------------------------------------------------------------------------------------------|
| Description          | 50cm x 30cm wooden frame, of which the two lengthwise borders extend an additional 20cm on one side. Corrugated metal sheet (corrugations 1cm breadth) set firmly within wooden frame. |
| Use                  | NB: this cannot be manufactured and must be purchased. To rehabilitate and enable clothes washing in hemiplegic patients.                                                              |
| Applicable Standards |                                                                                                                                                                                        |
| Note to Procurement  |                                                                                                                                                                                        |

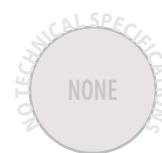

## Wheelchair spares kit

| Catalogue Number | Item Name             | Available on Transversal Contract | Contract Number or Code |
|------------------|-----------------------|-----------------------------------|-------------------------|
| PHC-C-327        | Wheelchair spares kit | No                                |                         |

|                      |                                                                                                                                                                        |
|----------------------|------------------------------------------------------------------------------------------------------------------------------------------------------------------------|
| Description          | A kit of the most commonly replaced parts on wheelchairs:<br>Wheel bearings front and rear, front seat guides, castor bearings, brake blocks, assorted nuts and bolts. |
| Use                  | For on-site repairs to wheelchairs.                                                                                                                                    |
| Applicable Standards |                                                                                                                                                                        |
| Note to Procurement  | There should be a standard kit. Used items can be replenished after an outreach trip.                                                                                  |

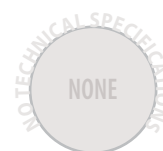

## Wheelchair gloves

| Catalogue Number | Item Name         | Available on Transversal Contract | Contract Number or Code |
|------------------|-------------------|-----------------------------------|-------------------------|
| PHC-C-337        | Wheelchair gloves | No                                |                         |

|                      |                                                                                                                            |                                                                                     |
|----------------------|----------------------------------------------------------------------------------------------------------------------------|-------------------------------------------------------------------------------------|
| Description          | Special gloves for wheelchair users.                                                                                       |  |
| Use                  | Used to protect patients' hands against friction while propelling a wheelchair, as well as provide improved grip strength. |                                                                                     |
| Applicable Standards |                                                                                                                            |                                                                                     |
| Note to Procurement  | Available in leather or lycra, full-length and half-length. Will be ordered per patient.                                   |                                                                                     |

## Wood



| Catalogue Number | Item Name | Available on Transversal Contract | Contract Number or Code |
|------------------|-----------|-----------------------------------|-------------------------|
| PHC-C-328        | Wood      | No                                |                         |
|                  |           |                                   |                         |

|                      |                                                                             |
|----------------------|-----------------------------------------------------------------------------|
| Description          | A selection of solid wood short planks and dowel rods of various diameters. |
| Use                  | Used in the manufacture of assistive devices.                               |
| Applicable Standards |                                                                             |
| Note to Procurement  |                                                                             |

# Sterilisation

## Bowie-Dick test packs

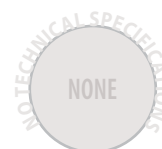

| Catalogue Number | Item Name             | Available on Transversal Contract | Contract Number or Code |
|------------------|-----------------------|-----------------------------------|-------------------------|
| PHC-C-213        | Bowie-Dick test packs | No                                |                         |

|                      |                                                                                                                                                                                                                                                                                                                          |
|----------------------|--------------------------------------------------------------------------------------------------------------------------------------------------------------------------------------------------------------------------------------------------------------------------------------------------------------------------|
| Description          | Standardised packs to test the efficacy of steam sterilisation in an autoclave.                                                                                                                                                                                                                                          |
| Use                  | A test pack is placed on the lowest, coolest part of the autoclave chamber (over the drain grate). The pre-heated autoclave is run on the Bowie-Dick cycle. A colour change is expected throughout the thermosensitive pattern in the centre of the pack. Incomplete or no colour change, indicates failure of the test. |
| Applicable Standards |                                                                                                                                                                                                                                                                                                                          |
| Note to Procurement  |                                                                                                                                                                                                                                                                                                                          |



## Helix test kit and strips

| Catalogue Number | Item Name                 | Available on Transversal Contract | Contract Number or Code |
|------------------|---------------------------|-----------------------------------|-------------------------|
| PHC-C-214        | Helix test kit and strips | No                                |                         |

|                      |                                                                                                                                                                                                                         |
|----------------------|-------------------------------------------------------------------------------------------------------------------------------------------------------------------------------------------------------------------------|
| Description          | The Helix test kit consists of a long, hollow, catheter-like vessel, into which a test strip is placed.                                                                                                                 |
| Use                  | The autoclave is then run on a Helix cycle (or a Bowie-dick cycle). This test assesses the steam's ability to penetrate deep hollow instruments. Lack of a colour change on the test strip means a failure of the test. |
| Applicable Standards |                                                                                                                                                                                                                         |
| Note to Procurement  |                                                                                                                                                                                                                         |

# Personal protection equipment

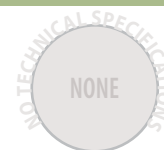

## Aprons: disposable

| Catalogue Number | Item Name         | Available on Transversal Contract | Contract Number or Code |
|------------------|-------------------|-----------------------------------|-------------------------|
| PHC-C-137        | Apron: disposable | No                                |                         |

|                      |                                                                        |
|----------------------|------------------------------------------------------------------------|
| Description          | Plastic or non-woven disposable apron.                                 |
| Use                  | To prevent contamination of the healthcare worker's clothes or person. |
| Applicable Standards | Non-woven: CKS 676:2005.                                               |
| Note to Procurement  |                                                                        |

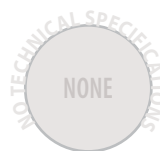

## Face shield

| Catalogue Number | Item Name   | Available on Transversal Contract | Contract Number or Code |
|------------------|-------------|-----------------------------------|-------------------------|
| PHC-C-080        | Face shield | No                                |                         |

|                      |                                                                                                                                                                                                                                                                                                                                                                                                                                                                           |
|----------------------|---------------------------------------------------------------------------------------------------------------------------------------------------------------------------------------------------------------------------------------------------------------------------------------------------------------------------------------------------------------------------------------------------------------------------------------------------------------------------|
| Description          | Clear polycarbonate face shield.                                                                                                                                                                                                                                                                                                                                                                                                                                          |
| Use                  | <p>To protect healthcare worker's face and eyes from contamination by blood or other biological material.</p> <p>Note the particular requirements for doffing this type of personal protection:</p> <ul style="list-style-type: none"> <li>Doff after hand-cleansing post-procedure</li> <li>Treat the front of the protection device as contaminated – handle only by the straps, elastic or ear loops</li> <li>Dispose as potentially harmful medical waste.</li> </ul> |
| Applicable Standards | None available.                                                                                                                                                                                                                                                                                                                                                                                                                                                           |
| Note to Procurement  |                                                                                                                                                                                                                                                                                                                                                                                                                                                                           |





## Gloves: sterile

| Catalogue Number | Item Name                                     | Available on Transversal Contract | Contract Number or Code |
|------------------|-----------------------------------------------|-----------------------------------|-------------------------|
| PHC-C-138        | Gloves: sterile size 6 or 6,5 or small (box)  | RT 76-2016                        | 42132205-00013          |
| PHC-C-139        | Gloves: sterile size 7 or 7,5 or medium (box) | RT 76-2016                        | 42132205-00014          |
| PHC-C-140        | Gloves: sterile size 8 or large (box)         | RT 76-2016                        | 42132205-00016          |

|                      |                                                                                                  |
|----------------------|--------------------------------------------------------------------------------------------------|
| Description          | Sterile latex gloves.                                                                            |
| Use                  | For sterile procedures. Single use.                                                              |
| Applicable Standards | SANS 68:2003.<br>ISO 10282:2002.                                                                 |
| Note to Procurement  | Ensure that a percentage of each order is of type suitable for people with Type 1 latex allergy. |



## Gloves: non-sterile

| Catalogue Number | Item Name                         | Available on Transversal Contract | Contract Number or Code |
|------------------|-----------------------------------|-----------------------------------|-------------------------|
| PHC-C-141        | Gloves: non-sterile, small (box)  | RT 76-2016                        | 42132203-00021          |
| PHC-C-142        | Gloves: non-sterile, Medium (box) | RT 76-2016                        | 42132203-00022          |
| PHC-C-143        | Gloves, non-sterile, large (box)  | RT 76-2016                        | 42132203-00023          |

|                      |                                                                                                    |
|----------------------|----------------------------------------------------------------------------------------------------|
| Description          | Non-sterile latex gloves, single use.                                                              |
| Use                  | To prevent cross-infection between healthcare worker and patient, during non-sterile examinations. |
| Applicable Standards | SANS 1193-1:2010.                                                                                  |
| Note to Procurement  | Ensure that a percentage of each order is of type suitable for people with Type 1 latex allergy.   |

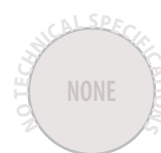

# Goggles

| Catalogue Number | Item Name | Available on Transversal Contract | Contract Number or Code |
|------------------|-----------|-----------------------------------|-------------------------|
| PHC-C-079        | Goggles   | No                                |                         |

|                      |                                                                                                                                                                                                                                                                                                                                                                                                                                                                                                                                                                     |
|----------------------|---------------------------------------------------------------------------------------------------------------------------------------------------------------------------------------------------------------------------------------------------------------------------------------------------------------------------------------------------------------------------------------------------------------------------------------------------------------------------------------------------------------------------------------------------------------------|
| Description          | Eye protection.                                                                                                                                                                                                                                                                                                                                                                                                                                                                                                                                                     |
| Use                  | <p>Clear shatter-proof lenses, to protect healthcare worker's eyes from contamination by blood or other biological material. May be worn alone, or over spectacles. Adjustable temples. Re-usable.</p> <p>Note the particular requirements for doffing this type of personal protection:</p> <ul style="list-style-type: none"> <li>Doff after hand -cleansing post-procedure</li> <li>Treat the front of the protection device as contaminated – handle only by the straps, elastic or ear loops</li> <li>Dispose as potentially harmful medical waste.</li> </ul> |
| Applicable Standards |                                                                                                                                                                                                                                                                                                                                                                                                                                                                                                                                                                     |
| Note to Procurement  | Non-fogging type preferred.                                                                                                                                                                                                                                                                                                                                                                                                                                                                                                                                         |

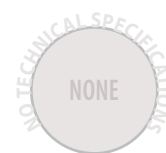

## Gown: disposable

| Catalogue Number | Item Name                     | Available on Transversal Contract | Contract Number or Code |
|------------------|-------------------------------|-----------------------------------|-------------------------|
| PHC-C-076        | Gown: long-sleeve, disposable | No                                |                         |

|                      |                                                                                                                                                                                                                                                                                                                                                                                                                                                                                               |
|----------------------|-----------------------------------------------------------------------------------------------------------------------------------------------------------------------------------------------------------------------------------------------------------------------------------------------------------------------------------------------------------------------------------------------------------------------------------------------------------------------------------------------|
| Description          | Sterile non-woven gown with long sleeves.                                                                                                                                                                                                                                                                                                                                                                                                                                                     |
| Use                  | <p>To prevent cross-infection between healthcare worker and patient, during sterile procedures and non-sterile examinations.</p> <p>Note the particular requirements for doffing this type of personal protection:</p> <ul style="list-style-type: none"> <li>Doff after hand -cleansing post-procedure</li> <li>Treat the front of the protection device as contaminated – handle only by the straps, elastic or ear loops</li> <li>Dispose as potentially harmful medical waste.</li> </ul> |
| Applicable Standards | CKS 676:2005.                                                                                                                                                                                                                                                                                                                                                                                                                                                                                 |
| Note to Procurement  |                                                                                                                                                                                                                                                                                                                                                                                                                                                                                               |

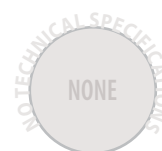

## Particulate mask (N-95 respirator)

| Catalogue Number | Item Name                          | Available on Transversal Contract | Contract Number or Code |
|------------------|------------------------------------|-----------------------------------|-------------------------|
| PHC-C-078        | Particulate mask (N-95 respirator) | No                                |                         |

|                      |                                                                                                                                                                                                                                                                                                                                                                                                                                                                                                                     |
|----------------------|---------------------------------------------------------------------------------------------------------------------------------------------------------------------------------------------------------------------------------------------------------------------------------------------------------------------------------------------------------------------------------------------------------------------------------------------------------------------------------------------------------------------|
| Description          | <p>High-efficiency respirator. Covers lower part of face and nose. Elasticised strap for holding the mask in position, bendable aluminium nose strap to improve seal.</p> <p>May have an exhalation valve for easier breathing.</p>                                                                                                                                                                                                                                                                                 |
| Use                  | <p>The respirator must be fitted to the individual healthcare worker, and tested for correct sealing. If incorrect, the respirator is ineffective.</p> <p>Note the particular requirements for doffing this type of personal protection:</p> <ul style="list-style-type: none"> <li>Doff after hand -cleansing post-procedure</li> <li>Treat the front of the protection device as contaminated – handle only by the straps, elastic or ear loops</li> <li>Dispose as potentially harmful medical waste.</li> </ul> |
| Applicable Standards | <p>SANS 50149:2003 ClassFFP2 or EN149:2001.</p> <p>95% efficiency at filtering 0,3 µm particles of sodium chloride at 200mg loading.</p>                                                                                                                                                                                                                                                                                                                                                                            |
| Note to Procurement  | <p>The CSIR recommends a normal distribution across sizes, when bulk ordering. 20% Small, 60% medium, and 20% large, is recommended.</p>                                                                                                                                                                                                                                                                                                                                                                            |

## Surgical mask

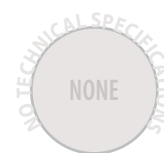

| Catalogue Number | Item Name     | Available on Transversal Contract | Contract Number or Code |
|------------------|---------------|-----------------------------------|-------------------------|
| PHC-C-077        | Surgical mask | No                                |                         |

|                      |                                                                                                                                                                                                                                                                                                                                                                                                                                                                                                                                                              |
|----------------------|--------------------------------------------------------------------------------------------------------------------------------------------------------------------------------------------------------------------------------------------------------------------------------------------------------------------------------------------------------------------------------------------------------------------------------------------------------------------------------------------------------------------------------------------------------------|
| Description          | Plain half-face mask with ear loops.                                                                                                                                                                                                                                                                                                                                                                                                                                                                                                                         |
| Use                  | <p>To prevent cross-infection between healthcare worker and patient, during sterile procedures and non-sterile examinations.</p> <p>NB not adequate protection against air-borne pathogens.</p> <p>Note the particular requirements for doffing this type of personal protection:</p> <ul style="list-style-type: none"> <li>Doff after hand -cleansing post-procedure</li> <li>Treat the front of the protection device as contaminated – handle only by the straps, elastic or ear loops</li> <li>Dispose as potentially harmful medical waste.</li> </ul> |
| Applicable Standards | SANS 1866:2008.                                                                                                                                                                                                                                                                                                                                                                                                                                                                                                                                              |
| Note to Procurement  |                                                                                                                                                                                                                                                                                                                                                                                                                                                                                                                                                              |

# consumables

## general

---

### BUILDING MAINTENANCE

#### CONSUMABLES

422

|                                       |     |
|---------------------------------------|-----|
| Bolts and nuts: assorted              | 422 |
| Contact adhesive                      | 423 |
| Glue: cyanoacrylate, rapid            | 424 |
| Glue: wood, waterproof                | 425 |
| Lubricating/releasing oil: spray can  | 426 |
| Nails: assorted                       | 427 |
| Oil: 2-stroke for brush cutter        | 428 |
| Oil: 20W50, for petrol lawnmower      | 429 |
| Rivets: blind, aluminium, assorted    | 430 |
| Screws: chipboard, assorted           | 431 |
| Screws: roofing, with sealing washers | 432 |
| Screws: self-tapping, assorted        | 433 |
| Sealant: silicone, marine, clear      | 434 |
| Tape: insulation                      | 435 |
| Washers: locking, assorted            | 436 |
| Washers: plain, galvanised            | 437 |

---

#### CLEANING

438

|                             |     |
|-----------------------------|-----|
| Aerosol insecticide         | 438 |
| Air freshener               | 439 |
| Bags: waste                 | 440 |
| Chlorine compounds (bleach) | 441 |
| Cloths: cleaning            | 442 |
| Detergent: liquid or powder | 443 |
| Dishwashing liquid          | 444 |
| Drain cleaner               | 445 |
| Floor polymer remover       | 446 |

|                                             |     |
|---------------------------------------------|-----|
| Floor protective polymer                    | 447 |
| Floor polisher replacement Cleaning disc    | 448 |
| Floor polisher replacement Scouring disc    | 449 |
| Hand rub: alcohol-based                     | 450 |
| High level disinfectants                    | 451 |
| Laundry detergent                           | 452 |
| Microfibre cloth for static head mop        | 453 |
| Paper towel: folded                         | 454 |
| Paper towel: roll                           | 455 |
| Sanitary all-purpose cleaner                | 456 |
| Soap: antimicrobial                         | 457 |
| Soap: handwashing, liquid non-antimicrobial | 458 |
| Surgical scrub brush sponges                | 459 |
| Toilet paper                                | 460 |
| Vacuum cleaner replacement filter set       | 461 |

---

#### GARDEN

462

---

#### GENERAL STATIONERY

463

|                       |     |
|-----------------------|-----|
| Files and accessories | 463 |
| Order forms and books | 464 |
| Writing materials     | 465 |

---

#### MISCELLANEOUS

466

|                          |     |
|--------------------------|-----|
| Disposable paper cups    | 466 |
| Identification tag       | 467 |
| Water packs for cold box | 468 |

# Building maintenance consumables

## Bolts and nuts: assorted

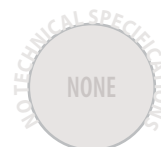

| Catalogue Number | Item Name                | Available on Transversal Contract | Contract Number or Code |
|------------------|--------------------------|-----------------------------------|-------------------------|
| PHC-C-040        | Bolts and nuts: assorted | No                                |                         |

|                      |                                                                                                                                                   |
|----------------------|---------------------------------------------------------------------------------------------------------------------------------------------------|
| Description          | Selection of bolts and nuts, from 4mm to 12mm, in lengths 10mm to 50mm, in standard threads. Includes Nylock self-locking nuts of the same sizes. |
| Use                  | To replace missing bolts or nuts, and to secure items to each other.                                                                              |
| Applicable Standards |                                                                                                                                                   |
| Note to Procurement  |                                                                                                                                                   |





## Contact adhesive

| Catalogue Number | Item Name            | Available on Transversal Contract | Contract Number or Code |
|------------------|----------------------|-----------------------------------|-------------------------|
| PHC-C-217        | Contact adhesive, 5l | No                                |                         |

|                      |                                                                                                                                                                                                                                                                                                                                                                                          |
|----------------------|------------------------------------------------------------------------------------------------------------------------------------------------------------------------------------------------------------------------------------------------------------------------------------------------------------------------------------------------------------------------------------------|
| Description          | All-purpose Polychloroprene rubber-based contact adhesive with high immediate bond strength, good brushability, water and heat resistance. Bonds instantly on contact to a variety of surfaces without clamping or sustained pressure. Excellent adhesion to Wood, processed boards (e.g. hardboard, supawood, chipboard, high pressure laminates, masonite, plywood), formica, veneers. |
| Use                  | For manufacturing cushions and postural support devices, as well as repairing boots, insoles, assistive devices in general.                                                                                                                                                                                                                                                              |
| Applicable Standards |                                                                                                                                                                                                                                                                                                                                                                                          |
| Note to Procurement  |                                                                                                                                                                                                                                                                                                                                                                                          |

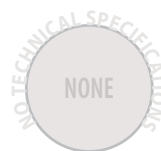

## Glue: cyanoacrylate, rapid

| Catalogue Number | Item Name                  | Available on Transversal Contract | Contract Number or Code |
|------------------|----------------------------|-----------------------------------|-------------------------|
| PHC-C-041        | Glue: cyanoacrylate, rapid | No                                |                         |
|                  |                            |                                   |                         |

|                      |                                                         |
|----------------------|---------------------------------------------------------|
| Description          | Fast-bonding superglue.                                 |
| Use                  | For rapid temporary repair of small items of equipment. |
| Applicable Standards |                                                         |
| Note to Procurement  |                                                         |



## Glue: wood, waterproof

| Catalogue Number | Item Name              | Available on Transversal Contract | Contract Number or Code |
|------------------|------------------------|-----------------------------------|-------------------------|
| PHC-C-042        | Glue: wood, waterproof | No                                |                         |

|                      |                                                                                                                                                                                                                                                     |
|----------------------|-----------------------------------------------------------------------------------------------------------------------------------------------------------------------------------------------------------------------------------------------------|
| Description          | Fast-setting, water-resistant wood glue for interior and exterior uses.                                                                                                                                                                             |
| Use                  | For temporary repairs of damaged wooden equipment or structural items.                                                                                                                                                                              |
| Applicable Standards | SANS 1348, Polyvinyl acetate dispersion adhesives for wood.<br>SANS 1349, Phenolic, amino-plastic and one-part polyurethane resin adhesives for the laminating and finger-jointing of timber, and for furniture and joinery.<br>SANS 10183:2009 D2. |
| Note to Procurement  |                                                                                                                                                                                                                                                     |



## Lubricating/releasing oil: spray can

| Catalogue Number | Item Name                            | Available on Transversal Contract | Contract Number or Code |
|------------------|--------------------------------------|-----------------------------------|-------------------------|
| PHC-C-043        | Lubricating/releasing oil: spray can | No                                |                         |

|                      |                                                              |
|----------------------|--------------------------------------------------------------|
| Description          | Rust-penetrating spray lubricant.                            |
| Use                  | To loosen rusted metal parts, general maintenance lubricant. |
| Applicable Standards |                                                              |
| Note to Procurement  |                                                              |

## Nails: assorted



| Catalogue Number | Item Name       | Available on Transversal Contract | Contract Number or Code |
|------------------|-----------------|-----------------------------------|-------------------------|
| PHC-C-044        | Nails: assorted | No                                |                         |
|                  |                 |                                   |                         |

|                      |                                                              |
|----------------------|--------------------------------------------------------------|
| Description          | Selection of Wire nails, 1,8mm to 6mm, lengths 32mm to 75mm. |
| Use                  | Used for general repairs and maintenance.                    |
| Applicable Standards |                                                              |
| Note to Procurement  |                                                              |



## Oil: 2-stroke for brush cutter

| Catalogue Number | Item Name                      | Available on Transversal Contract | Contract Number or Code |
|------------------|--------------------------------|-----------------------------------|-------------------------|
| PHC-C-045        | Oil: 2-stroke for brush cutter | No                                |                         |

|                      |                                                               |
|----------------------|---------------------------------------------------------------|
| Description          | Oil for 2-stroke engines.                                     |
| Use                  | Mixed with petrol according to manufacturer's specifications. |
| Applicable Standards |                                                               |
| Note to Procurement  |                                                               |

## Oil: 20W50, for petrol lawnmower

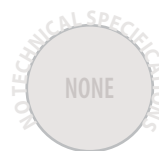

| Catalogue Number | Item Name                        | Available on Transversal Contract | Contract Number or Code |
|------------------|----------------------------------|-----------------------------------|-------------------------|
| PHC-C-046        | Oil: 20W50, for petrol lawnmower | No                                |                         |

|                      |                                                                                                                              |
|----------------------|------------------------------------------------------------------------------------------------------------------------------|
| Description          | Oil for 4-stroke motor in petrol-driven lawn mower.                                                                          |
| Use                  | Used to top up the machine's oil reservoir. Oil needs to be drained and replaced according to manufacturer's specifications. |
| Applicable Standards |                                                                                                                              |
| Note to Procurement  |                                                                                                                              |



## Rivets: blind, aluminium, assorted

| Catalogue Number | Item Name                          | Available on Transversal Contract | Contract Number or Code |
|------------------|------------------------------------|-----------------------------------|-------------------------|
| PHC-C-047        | Rivets: blind, aluminium, assorted | No                                |                         |

|                      |                                                                                                         |
|----------------------|---------------------------------------------------------------------------------------------------------|
| Description          | Pop rivets, 4,8mm in lengths 8, 10, 16mm.                                                               |
| Use                  | Used to effect temporary or permanent repairs in sheet metal parts, in conjunction with a hand riveter. |
| Applicable Standards |                                                                                                         |
| Note to Procurement  |                                                                                                         |



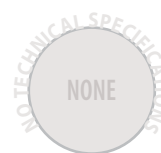

## Screws: chipboard, assorted

| Catalogue Number | Item Name                   | Available on Transversal Contract | Contract Number or Code |
|------------------|-----------------------------|-----------------------------------|-------------------------|
| PHC-C-048        | Screws: chipboard, assorted | No                                |                         |

|                      |                                                                                                                 |
|----------------------|-----------------------------------------------------------------------------------------------------------------|
| Description          | Coarse-threaded self-threading screws, for use in wood products.<br>4,5mm in various lengths: 20, 25, 40, 50mm. |
| Use                  | To re-attach fittings to wooden structures.                                                                     |
| Applicable Standards |                                                                                                                 |
| Note to Procurement  |                                                                                                                 |



## Screws: roofing, with sealing washers

| Catalogue Number | Item Name                             | Available on Transversal Contract | Contract Number or Code |
|------------------|---------------------------------------|-----------------------------------|-------------------------|
| PHC-C-050        | Screws: roofing, with sealing washers | No                                |                         |

|                      |                                                                                                                                               |
|----------------------|-----------------------------------------------------------------------------------------------------------------------------------------------|
| Description          | TEK-type roofing screws with non-hardening sealing washers and metal protective washers. Standard thickness and length.                       |
| Use                  | To fasten roof sheeting and fascia boards, which have loosened. The screws are self-tapping, and can be driven with a spanner or screwdriver. |
| Applicable Standards |                                                                                                                                               |
| Note to Procurement  |                                                                                                                                               |

## Screws: self-tapping, assorted



| Catalogue Number | Item Name                      | Available on Transversal Contract | Contract Number or Code |
|------------------|--------------------------------|-----------------------------------|-------------------------|
| PHC-C-049        | Screws: self-tapping, assorted | No                                |                         |

|                      |                                                                                      |
|----------------------|--------------------------------------------------------------------------------------|
| Description          | Selection of self-tapping screws, 3,5 to 6mm, lengths 12mm to 30mm.                  |
| Use                  | Used to re-attach fittings to metal structures, and for general sheet metal repairs. |
| Applicable Standards |                                                                                      |
| Note to Procurement  |                                                                                      |

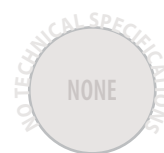

## Sealant: silicone, marine, clear

| Catalogue Number | Item Name                        | Available on Transversal Contract | Contract Number or Code |
|------------------|----------------------------------|-----------------------------------|-------------------------|
| PHC-C-051        | Sealant: silicone, marine, clear | No                                |                         |

|                      |                                                                                                              |
|----------------------|--------------------------------------------------------------------------------------------------------------|
| Description          | Silicone sealant in medium-size squeeze tube.                                                                |
| Use                  | For effecting temporary sealing and repairs of leaks, around basins, sanitary fittings, windows, roof leaks. |
| Applicable Standards | SANS 1305: 2009.                                                                                             |
| Note to Procurement  |                                                                                                              |



## Tape: insulation

| Catalogue Number | Item Name               | Available on Transversal Contract | Contract Number or Code |
|------------------|-------------------------|-----------------------------------|-------------------------|
| PHC-C-052        | Tape: insulation, black | No                                |                         |
| PHC-C-053        | Tape: insulation, white | No                                |                         |
| PHC-C-054        | Tape: insulation, red   | No                                |                         |
|                  |                         |                                   |                         |

|                      |                                                             |
|----------------------|-------------------------------------------------------------|
| Description          | Insulation tape in various colours, to match common wiring. |
| Use                  | For temporary repair of electric cords.                     |
| Applicable Standards | SANS 122: 2007.                                             |
| Note to Procurement  |                                                             |



## Washers: locking, assorted

| Catalogue Number | Item Name                  | Available on Transversal Contract | Contract Number or Code |
|------------------|----------------------------|-----------------------------------|-------------------------|
| PHC-C-056        | Washers: locking, assorted | No                                |                         |
|                  |                            |                                   |                         |

|                      |                                                                                                   |
|----------------------|---------------------------------------------------------------------------------------------------|
| Description          | Selection of locking washers (spring or star type), 4mm to 12mm.                                  |
| Use                  | Used to prevent loosening of nuts and bolts in metal components subject to movement or vibration. |
| Applicable Standards |                                                                                                   |
| Note to Procurement  |                                                                                                   |

## Washers: plain, galvanised



| Catalogue Number | Item Name                  | Available on Transversal Contract | Contract Number or Code |
|------------------|----------------------------|-----------------------------------|-------------------------|
| PHC-C-057        | Washers: plain, galvanised | No                                |                         |

|                      |                                                                                                                   |
|----------------------|-------------------------------------------------------------------------------------------------------------------|
| Description          | Selection of steel flat washers, 6mm to 19mm diameter.                                                            |
| Use                  | Used to spread the load when using bolts and nuts, and to permit some movement between attached metal components. |
| Applicable Standards |                                                                                                                   |
|                      |                                                                                                                   |
| Note to Procurement  |                                                                                                                   |

# Cleaning

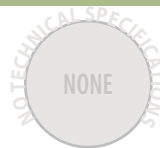

## Aerosol insecticide

| Catalogue Number | Item Name           | Available on Transversal Contract | Contract Number or Code |
|------------------|---------------------|-----------------------------------|-------------------------|
| PHC-C-071        | Aerosol insecticide | No                                |                         |

|                      |                                                                                                                                                                                      |
|----------------------|--------------------------------------------------------------------------------------------------------------------------------------------------------------------------------------|
| Description          | Insect killer spray.                                                                                                                                                                 |
| Use                  | Aerosol bio-degradable insecticide, effective against flying and crawling insect infestations. Toxic, store well away from food and medicines.                                       |
| Applicable Standards | In accordance with A Cleanliness Guideline for Health Workers 2015.<br>Required as non-negotiable cleaning materials in A Cleanliness Guideline for Health Workers 2015, Annexure A. |
| Note to Procurement  | SANS 899:2013 may be applicable, depending on the type of aerosol procured.                                                                                                          |



## Air freshener

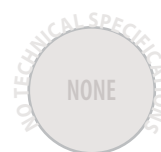

| Catalogue Number | Item Name     | Available on Transversal Contract | Contract Number or Code |
|------------------|---------------|-----------------------------------|-------------------------|
| PHC-C-069        | Air freshener | No                                |                         |

|                      |                                                                                                                                                                                      |
|----------------------|--------------------------------------------------------------------------------------------------------------------------------------------------------------------------------------|
| Description          | Air freshening spray.                                                                                                                                                                |
| Use                  | Aerosol room air deodoriser.                                                                                                                                                         |
| Applicable Standards | In accordance with A Cleanliness Guideline for Health Workers 2015.<br>Required as non-negotiable cleaning materials in A Cleanliness Guideline for Health Workers 2015, Annexure A. |
| Note to Procurement  |                                                                                                                                                                                      |

## Bags: waste



| Catalogue Number | Item Name                       | Available on Transversal Contract | Contract Number or Code |
|------------------|---------------------------------|-----------------------------------|-------------------------|
| PHC-C-190        | Bag: waste, black, large        | No                                |                         |
| PHC-C-191        | Bag: waste, 90l. Yellow         | No                                |                         |
| PHC-C-192        | Bag: waste, 90l. Green          | No                                |                         |
| PHC-C-193        | Bag: waste, 90l. Blue           | No                                |                         |
| PHC-C-194        | Bag: waste, 90l. White          | No                                |                         |
| PHC-C-195        | Bag: waste, 90l. Red heavy duty | No                                |                         |
| PHC-C-196        | Bag: waste, 20l. Red heavy duty | No                                |                         |

|                      |                                                                                                                                                                                                     |
|----------------------|-----------------------------------------------------------------------------------------------------------------------------------------------------------------------------------------------------|
| Description          | Bags for bin lining and waste management.                                                                                                                                                           |
| Use                  | For use in accordance with A Cleanliness Guideline for Health Workers 2015.                                                                                                                         |
| Applicable Standards | Required as non-negotiable cleaning materials in A Cleanliness Guideline for Health Workers 2015, Annexure A.<br>Colour-coded bags are intended for specific types of waste, as per the guidelines. |
| Note to Procurement  |                                                                                                                                                                                                     |



## Chlorine compounds (bleach)

| Catalogue Number | Item Name                   | Available on Transversal Contract | Contract Number or Code |
|------------------|-----------------------------|-----------------------------------|-------------------------|
| PHC-C-062        | Chlorine compounds (bleach) | No                                |                         |

|                      |                                                                                                                                                                                                                        |
|----------------------|------------------------------------------------------------------------------------------------------------------------------------------------------------------------------------------------------------------------|
| Description          | Chlorine containing compounds used for surface disinfection.                                                                                                                                                           |
| Use                  |                                                                                                                                                                                                                        |
| Applicable Standards | SANS 1032:2013, SANS 643:2013.<br>In accordance with A Cleanliness Guideline for Health Workers 2015.<br>Required as non-negotiable cleaning materials in A Cleanliness Guideline for Health Workers 2015, Annexure A. |
| Note to Procurement  |                                                                                                                                                                                                                        |



## Cloths: cleaning

| Catalogue Number | Item Name                                  | Available on Transversal Contract | Contract Number or Code |
|------------------|--------------------------------------------|-----------------------------------|-------------------------|
| PHC-C-185        | Cloth: cleaning, general purpose, 400x420  | RT 14-2016                        | 47131502-00000          |
| PHC-C-186        | Cloth: cleaning, 350X374. Yellow (50 pack) | RT 14-2016                        | 47131502-00001          |
| PHC-C-187        | Cloth: cleaning, 350X374. Green (50 pack)  | RT 14-2016                        | 47131502-00003          |
| PHC-C-188        | Cloth: cleaning, 350X374. Blue (50 pack)   | RT 14-2016                        | 47131502-00004          |
| PHC-C-189        | Cloth: cleaning, 330X580. (50 pack)        | RT 14-2016                        | 47131502-00002          |

|                      |                                                                                                                                                                                                         |
|----------------------|---------------------------------------------------------------------------------------------------------------------------------------------------------------------------------------------------------|
| Description          | Cloths for cleaning and dusting.                                                                                                                                                                        |
| Use                  | For use In accordance with A Cleanliness Guideline for Health Workers 2015.                                                                                                                             |
| Applicable Standards | Required as non-negotiable cleaning materials in A Cleanliness Guideline for Health Workers 2015, Annexure A.<br>Colour-coded cloths are intended for use in specific locations, as per the guidelines. |
| Note to Procurement  |                                                                                                                                                                                                         |

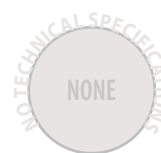

## Detergent: liquid or powder

| Catalogue Number | Item Name                  | Available on Transversal Contract | Contract Number or Code |
|------------------|----------------------------|-----------------------------------|-------------------------|
| PHC-C-065        | Detergent liquid or powder | No                                |                         |

|                      |                                                                                                                                                                                                        |
|----------------------|--------------------------------------------------------------------------------------------------------------------------------------------------------------------------------------------------------|
| Description          | Detergent for cleaning soiled or oily surfaces. Non-disinfectant.                                                                                                                                      |
| Use                  | For medium to heavy soiling.                                                                                                                                                                           |
| Applicable Standards | SANS1344:2017.<br>In accordance with A Cleanliness Guideline for Health Workers 2015.<br>Required as non-negotiable cleaning materials in A Cleanliness Guideline for Health Workers 2015, Annexure A. |
| Note to Procurement  |                                                                                                                                                                                                        |



## Dishwashing liquid

| Catalogue Number | Item Name          | Available on Transversal Contract | Contract Number or Code |
|------------------|--------------------|-----------------------------------|-------------------------|
| PHC-C-064        | Dishwashing liquid | No                                |                         |

|                      |                                                                                                                                                                                                        |
|----------------------|--------------------------------------------------------------------------------------------------------------------------------------------------------------------------------------------------------|
| Description          | Dishwashing and window-cleaning liquid.                                                                                                                                                                |
| Use                  | For use in accordance with A cleanliness Guide for Health Workers 2015.                                                                                                                                |
| Applicable Standards | SANS 825:2102.<br>In accordance with A Cleanliness Guideline for Health Workers 2015.<br>Required as non-negotiable cleaning materials in A Cleanliness Guideline for Health Workers 2015, Annexure A. |
| Note to Procurement  |                                                                                                                                                                                                        |



## Drain cleaner

| Catalogue Number | Item Name     | Available on Transversal Contract | Contract Number or Code |
|------------------|---------------|-----------------------------------|-------------------------|
| PHC-C-068        | Drain cleaner | No                                |                         |

|                      |                                                                                                                                                                                                                                  |
|----------------------|----------------------------------------------------------------------------------------------------------------------------------------------------------------------------------------------------------------------------------|
| Description          | Liquid, gel or granules, to dissolve blockages in drains.                                                                                                                                                                        |
| Use                  | Usually strongly alkaline compounds, which saponify fat, making it water-soluble. Toxic and potentially harmful to the user. Use strictly according to the manufacturer's instructions. Store well away from food and medicines. |
| Applicable Standards | In accordance with A Cleanliness Guideline for Health Workers 2015.<br>Required as non-negotiable cleaning materials in A Cleanliness Guideline for Health Workers 2015, Annexure A.                                             |
| Note to Procurement  |                                                                                                                                                                                                                                  |



## Floor polymer remover

| Catalogue Number | Item Name                        | Available on Transversal Contract | Contract Number or Code |
|------------------|----------------------------------|-----------------------------------|-------------------------|
| PHC-C-067        | Floor polymer remover (stripper) | No                                |                         |

|                      |                                                                                                                                                                                                        |
|----------------------|--------------------------------------------------------------------------------------------------------------------------------------------------------------------------------------------------------|
| Description          | Ammoniated or non-ammoniated compounds, for removal of floor polish.                                                                                                                                   |
| Use                  | For removal of weathered floor finish, prior to re-application.                                                                                                                                        |
| Applicable Standards | SANS1224:2017.<br>In accordance with A Cleanliness Guideline for Health Workers 2015.<br>Required as non-negotiable cleaning materials in A Cleanliness Guideline for Health Workers 2015, Annexure A. |
| Note to Procurement  |                                                                                                                                                                                                        |





## Floor protective polymer

| Catalogue Number | Item Name                | Available on Transversal Contract | Contract Number or Code |
|------------------|--------------------------|-----------------------------------|-------------------------|
| PHC-C-066        | Floor protective polymer | No                                |                         |

|                      |                                                                                                                                                                                                        |
|----------------------|--------------------------------------------------------------------------------------------------------------------------------------------------------------------------------------------------------|
| Description          | Polymer that provides a hard or soft protective coating on vinyl or other flooring.                                                                                                                    |
| Use                  | To create a protective shiny layer on vinyl or other flooring. When the surface dulls, it must be stripped and the polymer re-applied.                                                                 |
| Applicable Standards | SANS1042:2012.<br>In accordance with A Cleanliness Guideline for Health Workers 2015.<br>Required as non-negotiable cleaning materials in A Cleanliness Guideline for Health Workers 2015, Annexure A. |
| Note to Procurement  |                                                                                                                                                                                                        |

## Floor polisher replacement Cleaning disc

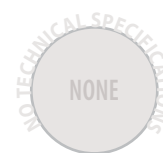

| Catalogue Number | Item Name                     | Available on Transversal Contract | Contract Number or Code |
|------------------|-------------------------------|-----------------------------------|-------------------------|
| PHC-C-208        | General purpose cleaning disc | No                                |                         |
|                  |                               |                                   |                         |

|                      |                                                                        |
|----------------------|------------------------------------------------------------------------|
| Description          | General-purpose cleaning disc for electric single-disc floor polisher. |
| Use                  | For general cleaning and polishing with the machine.                   |
| Applicable Standards | None available.                                                        |
| Note to Procurement  | Disc must be in series with PHC-F-020.                                 |



## Floor polisher replacement Scouring disc

| Catalogue Number | Item Name     | Available on Transversal Contract | Contract Number or Code |
|------------------|---------------|-----------------------------------|-------------------------|
| PHC-C-209        | Scouring disc | No                                |                         |
|                  |               |                                   |                         |

|                      |                                                                                                                                         |
|----------------------|-----------------------------------------------------------------------------------------------------------------------------------------|
| Description          | Abrasive disc for electric single-disc floor polisher.                                                                                  |
| Use                  | The abrasive disc is used on the floor polisher to remove (strip) old polymer finish, prior to re-application of the protective finish. |
| Applicable Standards | None available.                                                                                                                         |
| Note to Procurement  | Disc must be in series with PHC-F-020.                                                                                                  |



## Hand rub: alcohol-based

| Catalogue Number | Item Name                               | Available on Transversal Contract | Contract Number or Code |
|------------------|-----------------------------------------|-----------------------------------|-------------------------|
| PHC-C-060        | Hand rub: alcohol-based, with emollient | No                                |                         |

|                      |                                                                                                                                                                                                        |
|----------------------|--------------------------------------------------------------------------------------------------------------------------------------------------------------------------------------------------------|
| Description          | Gel-type compound used for hand disinfection.                                                                                                                                                          |
| Use                  | Not as effective as scrubbing. Can be used for disinfection between patient contacts, if soap and water are unavailable.                                                                               |
| Applicable Standards | SANS 490:2013.<br>In accordance with A Cleanliness Guideline for Health Workers 2015.<br>Required as non-negotiable cleaning materials in A Cleanliness Guideline for Health Workers 2015, Annexure A. |
| Note to Procurement  |                                                                                                                                                                                                        |



## High level disinfectants

| Catalogue Number | Item Name               | Available on Transversal Contract | Contract Number or Code |
|------------------|-------------------------|-----------------------------------|-------------------------|
| PHC-C-063        | Glutaraldehydes         | No                                |                         |
| PHC-C-384        | Sodium perborate powder | No                                |                         |
| PHC-C-385        | Phthalaldehydes         | No                                |                         |

|                      |                                                                                                                                                                                                                                                                                                                                                                                                                                                                                |
|----------------------|--------------------------------------------------------------------------------------------------------------------------------------------------------------------------------------------------------------------------------------------------------------------------------------------------------------------------------------------------------------------------------------------------------------------------------------------------------------------------------|
| Description          | <p>Certain equipment is not suitable for sterilisation by autoclaving. For such equipment High-level Disinfection is applicable. The commonest disinfectant is glutaraldehyde, but because of significant health risks to users, and resistance in certain mycobacteria, Ortho-phthalaldehyde is a viable replacement. However, Ortho-phthalaldehyde is not sporicidal.</p> <p>Sodium perborate (in combination with other chemicals) forms hydrogen peroxide in solution.</p> |
| Use                  | Used for de-contamination of surfaces or instruments.                                                                                                                                                                                                                                                                                                                                                                                                                          |
| Applicable Standards | <p>SANS 1593:2015, SANS 1615:2011.</p> <p>In accordance with A Cleanliness Guideline for Health Workers 2015.</p> <p>Required as non-negotiable cleaning materials in A Cleanliness Guideline for Health Workers 2015, Annexure A.</p>                                                                                                                                                                                                                                         |
| Note to Procurement  |                                                                                                                                                                                                                                                                                                                                                                                                                                                                                |



## Laundry detergent

| Catalogue Number | Item Name         | Available on Transversal Contract | Contract Number or Code |
|------------------|-------------------|-----------------------------------|-------------------------|
| PHC-C-070        | Laundry detergent | No                                |                         |
|                  |                   |                                   |                         |

|                      |                                                                                                                                                                                                       |
|----------------------|-------------------------------------------------------------------------------------------------------------------------------------------------------------------------------------------------------|
| Description          | Low-foam detergent for use in automatic washing machines.                                                                                                                                             |
| Use                  | Non-disinfectant laundry detergent.                                                                                                                                                                   |
| Applicable Standards | SANS651:2012.<br>In accordance with A Cleanliness Guideline for Health Workers 2015.<br>Required as non-negotiable cleaning materials in A Cleanliness Guideline for Health Workers 2015, Annexure A. |
| Note to Procurement  |                                                                                                                                                                                                       |



## Microfibre cloth for static head mop

| Catalogue Number | Item Name                            | Available on Transversal Contract | Contract Number or Code |
|------------------|--------------------------------------|-----------------------------------|-------------------------|
| PHC-C-210        | Microfibre cloth for static head mop | No                                |                         |

|                      |                                                                                                                |
|----------------------|----------------------------------------------------------------------------------------------------------------|
| Description          | A ready-made microfibre cloth sleeve, to fit over the frame of the static head mop.<br>Washable and re-usable. |
| Use                  | Used for dry-mopping of floors and other large surfaces.                                                       |
| Applicable Standards |                                                                                                                |
| Note to Procurement  | This item to be in series with the mop PHC-E-018                                                               |

## Paper towel: folded



| Catalogue Number | Item Name           | Available on Transversal Contract | Contract Number or Code |
|------------------|---------------------|-----------------------------------|-------------------------|
| PHC-C-072        | Paper towel: folded | RT 14                             | 14111703-0003           |

|                      |                                                                                                                         |                                                                                     |
|----------------------|-------------------------------------------------------------------------------------------------------------------------|-------------------------------------------------------------------------------------|
| Description          | Absorbent paper towels, individually folded. May be interleaved. Usually supplied in a pack, with a disposable wrapper. |  |
| Use                  | Used in a paper towel dispenser, wall-mounted close to a hand washbasin.                                                |                                                                                     |
| Applicable Standards | SANS 1887-4: 2015.                                                                                                      |                                                                                     |
| Note to Procurement  | Size must be compatible with dispenser PHC-E-020.                                                                       |                                                                                     |





## Paper towel: roll

| Catalogue Number | Item Name         | Available on Transversal Contract | Contract Number or Code |
|------------------|-------------------|-----------------------------------|-------------------------|
| PHC-C-073        | Paper towel: roll | No                                |                         |

|                      |                                                                                                                                                                                                            |                                                                                     |
|----------------------|------------------------------------------------------------------------------------------------------------------------------------------------------------------------------------------------------------|-------------------------------------------------------------------------------------|
| Description          | <p>Absorbent paper towel in roll form, with cardboard tube core. Widely used for domestic purposes, and therefore readily available. Standard and large size (but the width of the roll is unchanged).</p> |  |
| Use                  | Used in a paper towel roll holder, wall-mounted in the vicinity of hand washbasins or sinks.                                                                                                               |                                                                                     |
| Applicable Standards | SANS 1887-5: 2015.                                                                                                                                                                                         |                                                                                     |
| Note to Procurement  | Size must be compatible with PHC-E-021.                                                                                                                                                                    |                                                                                     |

## Sanitary all-purpose cleaner



| Catalogue Number | Item Name                    | Available on Transversal Contract | Contract Number or Code |
|------------------|------------------------------|-----------------------------------|-------------------------|
| PHC-C-136        | Sanitary all-purpose cleaner | No                                |                         |

|                      |                                                                                                                                                                                                                       |
|----------------------|-----------------------------------------------------------------------------------------------------------------------------------------------------------------------------------------------------------------------|
| Description          | Ammonia-containing liquid or gel cleaner.                                                                                                                                                                             |
| Use                  | All-purpose cleaner and sanitiser.                                                                                                                                                                                    |
| Applicable Standards | SANS 693:2013, SANS1225:1985.<br>In accordance with A Cleanliness Guideline for Health Workers 2015.<br>Required as non-negotiable cleaning materials in A Cleanliness Guideline for Health Workers 2015, Annexure A. |
| Note to Procurement  |                                                                                                                                                                                                                       |



## Soap: antimicrobial

| Catalogue Number | Item Name           | Available on Transversal Contract | Contract Number or Code |
|------------------|---------------------|-----------------------------------|-------------------------|
| PHC-C-059        | Soap: antimicrobial | No                                |                         |

|                      |                                                                                                                                                                                                        |
|----------------------|--------------------------------------------------------------------------------------------------------------------------------------------------------------------------------------------------------|
| Description          | Liquid antimicrobial soap, purchased in bulk.                                                                                                                                                          |
| Use                  | To achieve surgical cleanliness, when preparing for a procedure. Used in dedicated soap dispensers.                                                                                                    |
| Applicable Standards | SANS 288:2013.<br>In accordance with A Cleanliness Guideline for Health Workers 2015.<br>Required as non-negotiable cleaning materials in A Cleanliness Guideline for Health Workers 2015, Annexure A. |
| Note to Procurement  |                                                                                                                                                                                                        |

## Soap: handwashing, liquid non-antimicrobial



| Catalogue Number | Item Name                                   | Available on Transversal Contract | Contract Number or Code |
|------------------|---------------------------------------------|-----------------------------------|-------------------------|
| PHC-C-058        | Soap: handwashing, liquid non-antimicrobial | No                                |                         |

|                      |                                                      |
|----------------------|------------------------------------------------------|
| Description          | Liquid handwashing soap, purchased in bulk.          |
| Use                  | Used to refill soap dispensers near hand washbasins. |
| Applicable Standards | SANS 1924:2007.                                      |
| Note to Procurement  |                                                      |

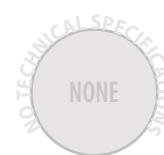

## Surgical scrub brush sponges

| Catalogue Number | Item Name                    | Available on Transversal Contract | Contract Number or Code |
|------------------|------------------------------|-----------------------------------|-------------------------|
| PHC-C-061        | Surgical scrub brush sponges | No                                |                         |

|                      |                                                                                                                                                                                                                        |
|----------------------|------------------------------------------------------------------------------------------------------------------------------------------------------------------------------------------------------------------------|
| Description          | Synthetic sponge with layer of semi-soft bristles.                                                                                                                                                                     |
| Use                  | Used to scrub hands and arms in preparation for a procedure. Bristles assist in cleaning under nails.                                                                                                                  |
| Applicable Standards | <p>None available.</p> <p>In accordance with A Cleanliness Guideline for Health Workers 2015.</p> <p>Required as non-negotiable cleaning materials in A Cleanliness Guideline for Health Workers 2015, Annexure A.</p> |
| Note to Procurement  |                                                                                                                                                                                                                        |



## Toilet paper

| Catalogue Number | Item Name    | Available on Transversal Contract | Contract Number or Code |
|------------------|--------------|-----------------------------------|-------------------------|
| PHC-C-081        | Toilet paper | RT 14                             | 14111704-0000           |

|                      |                                              |
|----------------------|----------------------------------------------|
| Description          | Toilet paper on roll.                        |
| Use                  | Single-ply, perforated. 600 sheets per roll. |
| Applicable Standards | SANS 1887-2: 2015 (Ed. 1.03).                |
| Note to Procurement  |                                              |



## Vacuum cleaner replacement filter set

| Catalogue Number | Item Name                              | Available on Transversal Contract | Contract Number or Code |
|------------------|----------------------------------------|-----------------------------------|-------------------------|
| PHC-C-216        | Replacement filter set: vacuum cleaner | No                                |                         |

|                      |                                                                                                                                                   |
|----------------------|---------------------------------------------------------------------------------------------------------------------------------------------------|
| Description          | Set of filters for canister-type vacuum cleaner.                                                                                                  |
| Use                  | Vacuum cleaner filters are cleanable, washable and re-usable, but must eventually be replaced. Replace inlet and outlet filters at the same time. |
| Applicable Standards | None.                                                                                                                                             |
| Note to Procurement  | Filters must be in series with PHC-F-046.                                                                                                         |

# Garden

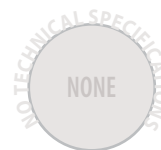

| Catalogue Number | Item Name                   | Available on Transversal Contract | Contract Number or Code |
|------------------|-----------------------------|-----------------------------------|-------------------------|
| PHC-C-082        | Bag, grass                  | No                                |                         |
| PHC-C-083        | Magnesium sulphate          | No                                |                         |
| PHC-C-084        | Lime-Ammonia-Nitrogen (LAN) | No                                |                         |
| PHC-C-085        | Weed killer                 | No                                |                         |

|                      |                                                                                                                                              |
|----------------------|----------------------------------------------------------------------------------------------------------------------------------------------|
| Description          | Consumables for garden maintenance.                                                                                                          |
| Use                  | Used by grounds maintenance staff.<br>A selection of fertilisers and a general purpose weed-killer (to exterminate grass growing in paving). |
| Applicable Standards |                                                                                                                                              |
| Note to Procurement  |                                                                                                                                              |



# General stationery

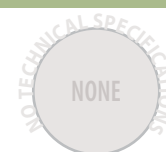

## Files and accessories

| Catalogue Number | Item Name                 | Available on Transversal Contract | Contract Number or Code |
|------------------|---------------------------|-----------------------------------|-------------------------|
| PHC-C-002        | File: top access, A4      | No                                |                         |
| PHC-C-003        | File: side access, A4     | No                                |                         |
| PHC-C-004        | File label: self-adhesive | No                                |                         |
| PHC-C-005        | File-out card             | No                                |                         |
| PHC-C-006        | File baskets/containers   | No                                |                         |

|                      |                                                                                                                                                                                                                                                                                                                                                                                                                                                                                                                                                                                                                                                                                                                                                                                                                                                                                                                                                                                                                   |                                                                                      |
|----------------------|-------------------------------------------------------------------------------------------------------------------------------------------------------------------------------------------------------------------------------------------------------------------------------------------------------------------------------------------------------------------------------------------------------------------------------------------------------------------------------------------------------------------------------------------------------------------------------------------------------------------------------------------------------------------------------------------------------------------------------------------------------------------------------------------------------------------------------------------------------------------------------------------------------------------------------------------------------------------------------------------------------------------|--------------------------------------------------------------------------------------|
| Description          | Files, labels and containers, to store loose A4 sheets and documents.                                                                                                                                                                                                                                                                                                                                                                                                                                                                                                                                                                                                                                                                                                                                                                                                                                                                                                                                             |  |
| Use                  | <p>Top access files are used in 4-drawer filing cabinets and similar systems. The files are stored upright in baskets or containers within each drawer.</p> <p>A self-adhesive label with the file number is applied along the top edge. The top edge has a printed scale, to permit accurate positioning of the label. Accurate positioning is vital for efficient filing and retrieval.</p> <p>Side access files are stored on shelves in bulk-filing systems. The right short edge has a printed scale for positioning of the self-adhesive label.</p> <p>A file-out card is inserted as a place-keeper when a file is retrieved, to ensure efficient and accurate re-filing.</p> <p>Heavy-duty A4 files, housing up to 300 A4 sheets.</p> <p>Top-access files have a printed scale along the top long edge.</p> <p>Side-access files have a printed scale along the right short edge.</p> <p>Self-adhesive labels have a transparent protective covering over the writing surface when correctly applied.</p> |                                                                                      |
| Applicable Standards | Lock away at end of working day, in compliance with POPI Act.                                                                                                                                                                                                                                                                                                                                                                                                                                                                                                                                                                                                                                                                                                                                                                                                                                                                                                                                                     |                                                                                      |
| Note to Procurement  |                                                                                                                                                                                                                                                                                                                                                                                                                                                                                                                                                                                                                                                                                                                                                                                                                                                                                                                                                                                                                   |                                                                                      |



## Order forms and books

| Catalogue Number | Item Name                      | Available on Transversal Contract | Contract Number or Code |
|------------------|--------------------------------|-----------------------------------|-------------------------|
| PHC-C-014        | Order Form: goods and supplies | No                                |                         |
| PHC-C-015        | Order book: goods and supplies | No                                |                         |

|                      |                                                                  |
|----------------------|------------------------------------------------------------------|
| Description          | Order Form or book.                                              |
| Use                  | Used to order goods and supplies as per departmental prescripts. |
| Applicable Standards |                                                                  |
| Note to Procurement  |                                                                  |



## Writing materials

| Catalogue Number | Item Name                                          | Available on Transversal Contract | Contract Number or Code |
|------------------|----------------------------------------------------|-----------------------------------|-------------------------|
| PHC-C-007        | Marker: permanent, fine-point, black               | No                                |                         |
| PHC-C-008        | Marker: whiteboard (erasable), medium point, black | No                                |                         |
| PHC-C-009        | Marker: whiteboard (erasable), medium point, red   | No                                |                         |
| PHC-C-010        | Pen: ballpoint, non-retractable, black             | No                                |                         |
| PHC-C-011        | Pen: ballpoint, non-retractable, red               | No                                |                         |
| PHC-C-012        | Pencil: HB                                         | No                                |                         |
| PHC-C-013        | Eraser: rubber                                     | No                                |                         |

|                      |                                                                                                     |
|----------------------|-----------------------------------------------------------------------------------------------------|
| Description          | Writing instruments.                                                                                |
| Use                  |                                                                                                     |
| Applicable Standards | Ballpoint pens: SANS 785:2006.<br>Pencils (wood-cased): SANS 1531:2003.<br>Erasers: SANS 1581:2012. |
| Note to Procurement  |                                                                                                     |

# Miscellaneous

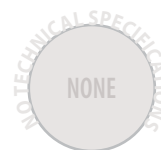

## Disposable paper cups

| Catalogue Number | Item Name             | Available on Transversal Contract | Contract Number or Code |
|------------------|-----------------------|-----------------------------------|-------------------------|
| PHC-C-164        | Disposable paper cups | No                                |                         |

|                      |                                                  |
|----------------------|--------------------------------------------------|
| Description          | Disposable paper cups, for use with watercooler. |
| Use                  | No polystyrene.                                  |
| Applicable Standards |                                                  |
| Note to Procurement  |                                                  |

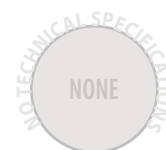

## Identification tag

| Catalogue Number | Item Name                    | Available on Transversal Contract | Contract Number or Code |
|------------------|------------------------------|-----------------------------------|-------------------------|
| PHC-C-202        | Identification tag, official | No                                |                         |

|                      |                                                                                                                                                                                                                                                                                                        |
|----------------------|--------------------------------------------------------------------------------------------------------------------------------------------------------------------------------------------------------------------------------------------------------------------------------------------------------|
| Description          | Official personnel identification tag – metal or laminated plastic.                                                                                                                                                                                                                                    |
| Use                  | For displaying the healthcare worker's name, to permit correct identification by members of the public.<br>Contains the emblem of the facility/District or Provincial Department of Health, and the full names / initials and surname of the staff member.<br>A photo of the staff member is optional. |
| Applicable Standards | All personal identification items must be safeguarded.                                                                                                                                                                                                                                                 |
| Note to Procurement  |                                                                                                                                                                                                                                                                                                        |



## Water packs for cold box

| Catalogue Number | Item Name                  | Available on Transversal Contract | Contract Number or Code |
|------------------|----------------------------|-----------------------------------|-------------------------|
| PHC-C-203        | Water packs for cooler box | No                                |                         |

|                      |                                                                                                                                                                                                                                                                            |
|----------------------|----------------------------------------------------------------------------------------------------------------------------------------------------------------------------------------------------------------------------------------------------------------------------|
| Description          | Re-usable, water-fillable containers.                                                                                                                                                                                                                                      |
| Use                  | Can be frozen or cooled, according to need. Placed in the vaccine cooler box in the numbers specified by the supplier, to achieve the specified temperature and cold-life. Do not replace with pre-filled type, as these may freeze below 0°C, and inactivate the vaccine. |
| Applicable Standards | Must comply with, and be pre-qualified on WHO PQS E005: Coolant packs for insulated containers. Proof to be supplied.                                                                                                                                                      |
| Note to Procurement  | Each cooler box should be supplied with two sets of packs, in the quantity specified by the manufacturer. Do not purchase pre-filled cooler packs – they may freeze at too low a temperature, and inactivate the vaccine.                                                  |

# D

## furniture & appliances

| CLINICAL                                                  | 470 | GENERAL                                   | 507 |
|-----------------------------------------------------------|-----|-------------------------------------------|-----|
| Bassinet                                                  | 470 | Chair: office                             | 507 |
| Bed: hospital, 2-section                                  | 471 | Chair: operator                           | 508 |
| Bed: hospital, mattress                                   | 472 | Chair: stackable, metal frame             | 509 |
| Bed: hospital, mattress cover                             | 473 | Chair: stackable, netted mid-back         | 510 |
| Bed: hospital, obstetric                                  | 474 | Chair: visitor                            | 511 |
| Bucket for kick-about                                     | 475 | Credenza                                  | 512 |
| Cabinet: medicine, mobile                                 | 476 | Cupboard: sterile stock                   | 513 |
| Cabinet: scheduled drugs, wall-mounted                    | 477 | Desk: 3-drawer, L-shaped                  | 514 |
| Couch: treatment, hydraulic Bobath (neuro)                | 478 | Desk: rectangular                         | 515 |
| Drip stand                                                | 479 | Filing Cabinet: bulk                      | 516 |
| Examination couch                                         | 480 | Filing cabinet: four-drawer               | 518 |
| Examination couch: portable                               | 481 | Floor polisher: electric, single disc     | 519 |
| Examination couch: rehab                                  | 482 | Freezer: chest, human tissue              | 520 |
| Foot stool                                                | 483 | Microwave oven: 25l, 900W manual          | 521 |
| Kick-about                                                | 484 | Mirror                                    | 522 |
| Locker: bedside, steel                                    | 485 | Refrigerator: bar type                    | 523 |
| Refrigerator: vaccine, chest                              | 486 | Refrigerator: double door                 | 524 |
| Refrigerator: vaccine, upright model                      | 487 | Refrigerator: single door                 | 525 |
| Screen: bedside, wheeled, complete                        | 488 | Seating: 2-seater                         | 526 |
| Screen: bedside, replacement curtains                     | 489 | Seating: 3-seater                         | 527 |
| Stool: anaesthetist                                       | 490 | Seating: 4-seater                         | 528 |
| Stool: dental assistant                                   | 491 | Steel cabinet: lockable, 6 shelves        | 529 |
| Stool: dentist                                            | 492 | Storage rack: exercise ball, wall-mounted | 530 |
| Stool: height-adjustable, with backrest                   | 493 | Table: folding                            | 531 |
| Table: over- bed                                          | 494 | Table: trapezoidal                        | 532 |
| Trolley: anaesthetic                                      | 495 | Tumble dryer                              | 533 |
| Trolley: emergency                                        | 496 | Vacuum cleaner                            | 534 |
| Trolley: gas cylinder                                     | 497 | Washing machine: front loader             | 535 |
| Trolley: medical dressing, large                          | 498 | Washing machine: top loader               | 536 |
| Trolley: medical instruments, medium                      | 499 |                                           |     |
| Trolley: medical dressing, small                          | 500 |                                           |     |
| Trolley: medical dressing with bucket and bowl attachment | 501 |                                           |     |
| Trolley: patient, with mattress                           | 502 |                                           |     |
| Trolley: soiled instruments and linen                     | 503 |                                           |     |
| Trolley: soiled linen, complete                           | 504 |                                           |     |
| Viewing box: X-ray                                        | 505 |                                           |     |
| Wheelchair: porter                                        | 506 |                                           |     |

## Bassinet

| Catalogue Number | Item Name          | Available on Transversal Contract | Contract Number or Code |
|------------------|--------------------|-----------------------------------|-------------------------|
| PHC-F-025        | Bassinet, complete | RT 24                             | RT 24-02-018            |

|                                    |                                                                                                                                                                                                                       |                                                                                      |
|------------------------------------|-----------------------------------------------------------------------------------------------------------------------------------------------------------------------------------------------------------------------|--------------------------------------------------------------------------------------|
| Description                        | Bassinet, complete (frame, bassinet and mattress).                                                                                                                                                                    |  |
| Use                                | For safe examination of an infant.                                                                                                                                                                                    |                                                                                      |
| Clinical or User Specifications    | Steel frame, Transparent plastic bassinet. Complete with mattress.<br>Castor-mounted.<br>Spare mattress available as item RT 24-02-021. Thickness approximately 50mm. Mattress cover is waterproof and air-permeable. |                                                                                      |
| Accessories or Related Consumables | Bassinet, plastic, spare PHC-F-026.<br>Mattress for bassinet, spare PHC-F-027.                                                                                                                                        |                                                                                      |
| Care                               | Standard cleaning and disinfecting.                                                                                                                                                                                   |                                                                                      |
| Supplier Warranty                  | 2 years (excluding deliberate or accidental damage).                                                                                                                                                                  |                                                                                      |



## Bed: hospital, 2-section

| Catalogue Number | Item Name                | Available on Transversal Contract | Contract Number or Code |
|------------------|--------------------------|-----------------------------------|-------------------------|
| PHC-F-072        | Bed: hospital, 2-section | RT24-2016                         | RT24-02-001             |

|                                    |                                                                                                                                                                                                                                                                                                                                                                                                                                                                                     |                                                                                     |
|------------------------------------|-------------------------------------------------------------------------------------------------------------------------------------------------------------------------------------------------------------------------------------------------------------------------------------------------------------------------------------------------------------------------------------------------------------------------------------------------------------------------------------|-------------------------------------------------------------------------------------|
| Description                        | Basic hospital bed                                                                                                                                                                                                                                                                                                                                                                                                                                                                  |  |
| Use                                | For use in short-stay areas.                                                                                                                                                                                                                                                                                                                                                                                                                                                        |                                                                                     |
| Clinical or User Specifications    | <p>Mild steel frame with epoxy/nylon powder-coated finish.</p> <p>Epoxy/nylon powder coating colours: white, cream or grey.</p> <p>Bed must support a patient mass of 180 kg Adjustable backrest with gas spring assist, suitable for 100 kg patient.</p> <p>To be fitted with castors, two swivel, two locking</p> <p>Removable head and foot ends (ABS material is acceptable)</p> <p>With collapsible safety sides.</p> <p>Mattress support other than weldmesh is required.</p> |                                                                                     |
| Accessories or Related Consumables | Complete with folding cot sides. Drip pole and patient lifting pole and strap optional                                                                                                                                                                                                                                                                                                                                                                                              |                                                                                     |
| Care                               | Standard cleaning and disinfection                                                                                                                                                                                                                                                                                                                                                                                                                                                  |                                                                                     |
| Supplier Warranty                  | 2 years                                                                                                                                                                                                                                                                                                                                                                                                                                                                             |                                                                                     |

## Bed: hospital, mattress

| Catalogue Number | Item Name               | Available on Transversal Contract | Contract Number or Code |
|------------------|-------------------------|-----------------------------------|-------------------------|
| PHC-F-073        | Bed: hospital, mattress | RT24-2016                         | RT24-02-014             |

|                                    |                                                                                                                                                                                                                                                                                                                                                                                                                                                                                                                                                                                           |
|------------------------------------|-------------------------------------------------------------------------------------------------------------------------------------------------------------------------------------------------------------------------------------------------------------------------------------------------------------------------------------------------------------------------------------------------------------------------------------------------------------------------------------------------------------------------------------------------------------------------------------------|
| Description                        | Bed mattress                                                                                                                                                                                                                                                                                                                                                                                                                                                                                                                                                                              |
| Use                                | Can be used independently of bed type. Purchased separately from the bed chassis.                                                                                                                                                                                                                                                                                                                                                                                                                                                                                                         |
| Clinical or User Specifications    | <p>Mattress for hospital bed/cot.</p> <p>The mattress with cover must be flexible to accommodate anatomical contouring of all the angles of the bed.</p> <p>Mattress must support a patient of at least 180 kg and return to original shape when not in use.</p> <p>Mattress must be radio-translucent. To be constructed of flexible polyurethane foam ("memory foam").</p> <p>Overall dimensions: Length: 1 980 mm (-0 and +40mm) Width: 860 mm (-0 and +20mm) Thickness: 150 mm (-0 and +5mm).</p> <p>Must include removable cover (also available as replacement item PHC-F-074).</p> |
| Accessories or Related Consumables |                                                                                                                                                                                                                                                                                                                                                                                                                                                                                                                                                                                           |
| Care                               | Standard cleaning and disinfection.                                                                                                                                                                                                                                                                                                                                                                                                                                                                                                                                                       |
| Supplier Warranty                  | 2 years.                                                                                                                                                                                                                                                                                                                                                                                                                                                                                                                                                                                  |

## Bed: hospital, mattress cover

| Catalogue Number | Item Name                     | Available on Transversal Contract | Contract Number or Code |
|------------------|-------------------------------|-----------------------------------|-------------------------|
| PHC-F-074        | Bed: hospital, mattress cover | RT24-2016                         | RT24-02-015             |

|                                    |                                                                                                                                                                                                                                                                                                                                                                    |
|------------------------------------|--------------------------------------------------------------------------------------------------------------------------------------------------------------------------------------------------------------------------------------------------------------------------------------------------------------------------------------------------------------------|
| Description                        | Mattress cover.                                                                                                                                                                                                                                                                                                                                                    |
| Use                                | Removable, replaceable mattress cover.                                                                                                                                                                                                                                                                                                                             |
| Clinical or User Specifications    | <p>Cover for mattress (for hospital bed/cot).</p> <p>Cover must be removable, water-resistant, air permeable material and radio-translucent.</p> <p>Where a zip is incorporated, it shall be a heavy duty, large- toothed synthetic zip to allow removal of the inner mattress, totally covered by a flap extending over the zip to prevent ingress of fluids.</p> |
| Accessories or Related Consumables |                                                                                                                                                                                                                                                                                                                                                                    |
| Care                               | Standard cleaning and disinfection.                                                                                                                                                                                                                                                                                                                                |
| Supplier Warranty                  | 2 years.                                                                                                                                                                                                                                                                                                                                                           |

## Bed: hospital, obstetric

| Catalogue Number | Item Name                | Available on Transversal Contract | Contract Number or Code |
|------------------|--------------------------|-----------------------------------|-------------------------|
| PHC-F-029        | Bed: hospital, obstetric | RT 24                             | RT 24-02-009            |

|                                    |                                                                                                                                                                             |                                                                                     |
|------------------------------------|-----------------------------------------------------------------------------------------------------------------------------------------------------------------------------|-------------------------------------------------------------------------------------|
| Description                        | Delivery bed.                                                                                                                                                               |  |
| Use                                | To be used for resuscitations, as well as occasional emergency deliveries in PHC facilities without a MOU. Also used as a regular delivery bed in MOUs.                     |                                                                                     |
| Clinical or User Specifications    | Epoxy-coated steel frame, 2 sections Complete with mattress.<br>Removable foot section, adjustable backrest, hydraulic adjustment of bed height and Trendelenburg position. |                                                                                     |
| Accessories or Related Consumables | Two lithotomy poles, height adjustable, swivel action, with leg support (not straps).<br>Douche fitting.<br>Douche tray, stainless steel.<br>Drip rod.                      |                                                                                     |
| Care                               | Standard cleaning and disinfecting.                                                                                                                                         |                                                                                     |
| Supplier Warranty                  | 5 years (excluding deliberate or accidental damage).                                                                                                                        |                                                                                     |

# Bucket for kick-about

| Catalogue Number | Item Name             | Available on Transversal Contract | Contract Number or Code |
|------------------|-----------------------|-----------------------------------|-------------------------|
| PHC-F-033        | Bucket for kick-about | RT 24                             | RT 24-10-004            |

|                                    |                                                                                                            |
|------------------------------------|------------------------------------------------------------------------------------------------------------|
| Description                        | Bucket for kick-about.  |
| Use                                | For convenient temporary disposal of medical waste, during procedures.                                     |
| Clinical or User Specifications    | Stainless steel bucket, to be ordered together with Kick-about RT 24-10-003.                               |
| Accessories or Related Consumables |                                                                                                            |
| Care                               | Standard cleaning and disinfecting.                                                                        |
| Supplier Warranty                  | 2 years (excluding deliberate or accidental damage).                                                       |

## Cabinet: medicine, mobile

| Catalogue Number | Item Name                 | Available on Transversal Contract | Contract Number or Code |
|------------------|---------------------------|-----------------------------------|-------------------------|
| PHC-F-069        | Cabinet: medicine, mobile | RT24-2016                         | RT24-04-003             |

|                                    |                                                                                                                                                                                                                                                                                                                                                                                                                                                                                                                                                                                                                             |                                                                                     |
|------------------------------------|-----------------------------------------------------------------------------------------------------------------------------------------------------------------------------------------------------------------------------------------------------------------------------------------------------------------------------------------------------------------------------------------------------------------------------------------------------------------------------------------------------------------------------------------------------------------------------------------------------------------------------|-------------------------------------------------------------------------------------|
| Description                        | Mobile medicine trolley, in ABS plastic.                                                                                                                                                                                                                                                                                                                                                                                                                                                                                                                                                                                    |  |
| Use                                | In a ward environment, used to keep and dispense prescribed medication.                                                                                                                                                                                                                                                                                                                                                                                                                                                                                                                                                     |                                                                                     |
| Clinical or User Specifications    | <p>Top surface to be flat, suitable for writing and dispensing.</p> <p>Multiple drawers with dividers (4- 6 drawers) Two large storage drawers, no dividers.</p> <p>Drawers must have smooth, durable sliding mechanism with stop to prevent total extraction of drawer.</p> <p>Approximate dimensions: Height: 950 mm Width: 750 mm Depth: 500 mm.</p> <p>Mounted on 4 heavy duty swivel castors 125 mm diameter, the two front castors should be fitted with foot brakes with toe release mechanism.</p> <p>Materials which are easily cleaned and of lasting finish, and low noise generating nature, shall be used.</p> |                                                                                     |
| Accessories or Related Consumables |                                                                                                                                                                                                                                                                                                                                                                                                                                                                                                                                                                                                                             |                                                                                     |
| Care                               | Standard cleaning and disinfection.                                                                                                                                                                                                                                                                                                                                                                                                                                                                                                                                                                                         |                                                                                     |
| Supplier Warranty                  | 2 years.                                                                                                                                                                                                                                                                                                                                                                                                                                                                                                                                                                                                                    |                                                                                     |

## Cabinet: scheduled drugs, wall-mounted

| Catalogue Number | Item Name                              | Available on Transversal Contract | Contract Number or Code |
|------------------|----------------------------------------|-----------------------------------|-------------------------|
| PHC-F-070        | Cabinet: scheduled drugs, wall-mounted | RT24-2016                         | RT24-04-005             |

|                                    |                                                                                                                                     |                                                                                     |
|------------------------------------|-------------------------------------------------------------------------------------------------------------------------------------|-------------------------------------------------------------------------------------|
| Description                        | Wall-mounted lockable cabinet.                                                                                                      |  |
| Use                                | For secure storage of scheduled drugs.                                                                                              |                                                                                     |
| Clinical or User Specifications    | Mild steel with epoxy/nylon powder-coated finish.<br>At least one internal shelf.<br>NOTE: The cabinet must not be marked "Poison". |                                                                                     |
| Accessories or Related Consumables | All wall-mounting hardware. 2 keys.                                                                                                 |                                                                                     |
| Care                               | Standard cleaning and disinfection.                                                                                                 |                                                                                     |
| Supplier Warranty                  | 2 years.                                                                                                                            |                                                                                     |

## Couch: treatment, hydraulic Bobath (neuro)

| Catalogue Number | Item Name                                 | Available on Transversal Contract | Contract Number or Code |
|------------------|-------------------------------------------|-----------------------------------|-------------------------|
| PHC-F-060        | Treatment couch: hydraulic Bobath (neuro) | No                                |                         |

|                                    |                                                                                                                                                                                                                                       |                                                                                     |
|------------------------------------|---------------------------------------------------------------------------------------------------------------------------------------------------------------------------------------------------------------------------------------|-------------------------------------------------------------------------------------|
| Description                        | Large padded treatment couch/plinth, height adjustable (hydraulic) and modular: for treating patients with neurological impairments.                                                                                                  |  |
| Use                                | For rehabilitating neuro clients and those with severe mobility impairments. It is critical that it is height adjustable from a patient safety as well as rehabilitation (motor learning) perspective.                                |                                                                                     |
| Clinical or User Specifications    | Hydraulic is preferable to electric in areas where power supply is erratic. Plinth must be covered with durable vinyl which is easily cleanable.<br>120-125cm wide, 195cm long, height range 46cm-91cm, backrest angle 80-85 degrees. |                                                                                     |
| Accessories or Related Consumables | None.                                                                                                                                                                                                                                 |                                                                                     |
| Care                               | Do not exceed maximum carrying capacity. Standard cleaning and disinfection.                                                                                                                                                          |                                                                                     |
| Supplier Warranty                  | 3 years (excluding deliberate or accidental damage).                                                                                                                                                                                  |                                                                                     |



# Drip stand

| Catalogue Number | Item Name          | Available on Transversal Contract | Contract Number or Code |
|------------------|--------------------|-----------------------------------|-------------------------|
| PHC-F-028        | Drip stand: mobile | RT 24                             | RT 24-10-001            |

|                                    |                                                               |                                                                                     |
|------------------------------------|---------------------------------------------------------------|-------------------------------------------------------------------------------------|
| Description                        | Drip stand, mobile.                                           |  |
| Use                                | For hanging containers of intravenous fluid, during infusion. |                                                                                     |
| Clinical or User Specifications    | Castor-mounted mobile stand for IV bags.                      |                                                                                     |
| Accessories or Related Consumables |                                                               |                                                                                     |
| Care                               | Standard cleaning and disinfecting.                           |                                                                                     |
| Supplier Warranty                  | 2 years (excluding deliberate or accidental damage).          |                                                                                     |

## Examination couch

| Catalogue Number | Item Name         | Available on Transversal Contract | Contract Number or Code |
|------------------|-------------------|-----------------------------------|-------------------------|
| PHC-F-030        | Examination couch | RT 24                             | RT 24-02-024            |

|                                    |                                                                                                                                                                                                                      |                                                                                     |
|------------------------------------|----------------------------------------------------------------------------------------------------------------------------------------------------------------------------------------------------------------------|-------------------------------------------------------------------------------------|
| Description                        | Examination couch.                                                                                                                                                                                                   |  |
| Use                                | To be used for physical examination of patients.                                                                                                                                                                     |                                                                                     |
| Clinical or User Specifications    | Two-piece design. Head part can be raised up to 60 degrees above horizontal.<br>Padded upper surface, covered in waterproof, dark-coloured fabric.<br>Epoxy powder-coated Mild steel frame. Rubber ferrules on feet. |                                                                                     |
| Accessories or Related Consumables |                                                                                                                                                                                                                      |                                                                                     |
| Care                               | Standard cleaning and disinfecting.                                                                                                                                                                                  |                                                                                     |
| Supplier Warranty                  | 5 years (excluding deliberate or accidental damage).                                                                                                                                                                 |                                                                                     |

## Examination couch: portable

| Catalogue Number | Item Name                   | Available on Transversal Contract | Contract Number or Code |
|------------------|-----------------------------|-----------------------------------|-------------------------|
| PHC-F-061        | Examination couch: portable | No                                |                         |

|                                    |                                                                                                                                                                |                                                                                     |
|------------------------------------|----------------------------------------------------------------------------------------------------------------------------------------------------------------|-------------------------------------------------------------------------------------|
| Description                        | <p>Folding examination couch, modular, height adjustable, with removable head and arm rests in a canvas bag.</p>                                               |  |
| Use                                | <p>Used extensively in rehabilitating acute musculoskeletal and orthopaedic patients, as well as treating pulmonology.</p>                                     |                                                                                     |
| Clinical or User Specifications    | <p>Maximum weight is important- the more it can carry, the better. A durable carry case is also important to improve care of the product during transport.</p> |                                                                                     |
| Accessories or Related Consumables | <p>In some models, padded headrest/breathing hole and arm supports may come separately. Should be included.</p>                                                |                                                                                     |
| Care                               | <p>Do not exceed maximum carrying capacity. Standard cleaning and disinfection.</p>                                                                            |                                                                                     |
| Supplier Warranty                  | <p>3 years (excluding deliberate or accidental damage).</p>                                                                                                    |                                                                                     |

## Examination couch: rehab

| Catalogue Number | Item Name                | Available on Transversal Contract | Contract Number or Code |
|------------------|--------------------------|-----------------------------------|-------------------------|
| PHC-F-062        | Examination couch: rehab | No                                |                         |

|                                    |                                                                                                                                        |                                                                                     |
|------------------------------------|----------------------------------------------------------------------------------------------------------------------------------------|-------------------------------------------------------------------------------------|
| Description                        | Examination couch with breathing hole. The top 1/3 is adjustable to 60 degrees from the horizontal.                                    |  |
| Use                                | Used extensively in rehabilitating acute musculoskeletal and orthopaedic patients, as well as treating pulmonology.                    |                                                                                     |
| Clinical or User Specifications    | Must have breathing hole and adjustable top 1/3.<br>Need one of this type per facility; remainder can be standard examination couches. |                                                                                     |
| Accessories or Related Consumables | None.                                                                                                                                  |                                                                                     |
| Care                               | Standard cleaning and disinfection.                                                                                                    |                                                                                     |
| Supplier Warranty                  | 2 years (excluding deliberate or accidental damage).                                                                                   |                                                                                     |

# Foot stool

| Catalogue Number | Item Name          | Available on Transversal Contract | Contract Number or Code |
|------------------|--------------------|-----------------------------------|-------------------------|
| PHC-F-031        | Foot stool: 2-step | RT 24                             | RT 24-11-003            |

|                                    |                                                                                                                                                                                                                                                 |                                                                                     |
|------------------------------------|-------------------------------------------------------------------------------------------------------------------------------------------------------------------------------------------------------------------------------------------------|-------------------------------------------------------------------------------------|
| Description                        | Foot stool, 2-step.                                                                                                                                                                                                                             |  |
| Use                                | To facilitate patient's access to the examination couch.                                                                                                                                                                                        |                                                                                     |
| Clinical or User Specifications    | Robust, reinforced 2-step all-metal stool. White epoxy-coated tubular frame.<br>Non-scratch rubber ferrules on legs.<br>Non-slip chequered surface on steps.<br>All sharp edges are enclosed in a smooth metal band around each step.           |                                                                                     |
| Accessories or Related Consumables |                                                                                                                                                                                                                                                 |                                                                                     |
| Care                               | Standard cleaning and disinfecting.                                                                                                                                                                                                             |                                                                                     |
| Supplier Warranty                  | 2 years (excluding deliberate or accidental damage).<br><b>NB:</b> these steps are guaranteed to carry at least 180Kg without distortion. If any example bends under normal use, contact SCM to initiate recourse proceedings against supplier. |                                                                                     |

# Kick-about

| Catalogue Number | Item Name  | Available on Transversal Contract | Contract Number or Code |
|------------------|------------|-----------------------------------|-------------------------|
| PHC-F-032        | Kick-about | RT 24                             | RT 24-10-003            |

|                                    |                                                                                                    |                                                                                     |
|------------------------------------|----------------------------------------------------------------------------------------------------|-------------------------------------------------------------------------------------|
| Description                        | Kick-about for bucket.                                                                             |  |
| Use                                | For convenient temporary disposal of medical waste, during procedures.                             |                                                                                     |
| Clinical or User Specifications    | Castor-mounted kick-about stand. To be ordered together with stainless steel bucket, RT 24-10-004. |                                                                                     |
| Accessories or Related Consumables |                                                                                                    |                                                                                     |
| Care                               | Standard cleaning and disinfecting.                                                                |                                                                                     |
| Supplier Warranty                  | 2 years (excluding deliberate or accidental damage).                                               |                                                                                     |

## Locker: bedside, steel

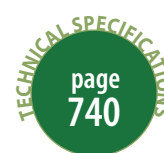

| Catalogue Number | Item Name              | Available on Transversal Contract | Contract Number or Code |
|------------------|------------------------|-----------------------------------|-------------------------|
| PHC-F-071        | Locker: bedside, steel | RT24-2016                         | RT24-07-001             |

|                                    |                                                                                                                                                                                                                                   |                                                                                     |
|------------------------------------|-----------------------------------------------------------------------------------------------------------------------------------------------------------------------------------------------------------------------------------|-------------------------------------------------------------------------------------|
| Description                        | Bedside locker in steel.                                                                                                                                                                                                          |  |
| Use                                | Temporary storage of personal non-valuable belongings.                                                                                                                                                                            |                                                                                     |
| Clinical or User Specifications    | <p>Stainless steel top, single drawer.</p> <p>Must have a rail on both sides Pull-out drawer Locker mounted on 4 castors.</p> <p>Drawer must have a durable sliding mechanism and stop to prevent total extraction of drawer.</p> |                                                                                     |
| Accessories or Related Consumables |                                                                                                                                                                                                                                   |                                                                                     |
| Care                               | Standard cleaning and disinfection.                                                                                                                                                                                               |                                                                                     |
| Supplier Warranty                  | 2 years.                                                                                                                                                                                                                          |                                                                                     |

## Refrigerator: vaccine, chest

| Catalogue Number | Item Name                          | Available on Transversal Contract | Contract Number or Code |
|------------------|------------------------------------|-----------------------------------|-------------------------|
| PHC-F-049        | Refrigerator: vaccine, chest model | No                                |                         |

|                                    |                                                                                                                                                                                                                                                                                                                                                                                                                                                                                                                                                                                                                                              |                                                                                     |
|------------------------------------|----------------------------------------------------------------------------------------------------------------------------------------------------------------------------------------------------------------------------------------------------------------------------------------------------------------------------------------------------------------------------------------------------------------------------------------------------------------------------------------------------------------------------------------------------------------------------------------------------------------------------------------------|-------------------------------------------------------------------------------------|
| Description                        | Chest-type refrigerator for vaccine and blood products.                                                                                                                                                                                                                                                                                                                                                                                                                                                                                                                                                                                      |  |
| Use                                | Used to store vaccines and blood products.                                                                                                                                                                                                                                                                                                                                                                                                                                                                                                                                                                                                   |                                                                                     |
| Clinical or User Specifications    | <p>Chest-type refrigerator, minimum 100l. Alternative upright model is available, if more appropriate for the location.</p> <p>Will keep temperature low for at least 48 hours, in the event of a power failure, i.e. over a weekend.</p> <p>This unit is designed to maintain the recommended cold-chain conditions for vaccines and blood products, i.e. must maintain the temperature between specified upper and lower limits. The unit must provide protection against freezing, as freezing will inactivate the vaccine.</p> <p>A separate data-logging thermometer will be used to keep a record of daily temperature variations.</p> |                                                                                     |
| Accessories or Related Consumables | None.                                                                                                                                                                                                                                                                                                                                                                                                                                                                                                                                                                                                                                        |                                                                                     |
| Care                               | Clean interior and exterior with standard cleaning and disinfectant solutions.                                                                                                                                                                                                                                                                                                                                                                                                                                                                                                                                                               |                                                                                     |
| Supplier Warranty                  | 3 years (excluding deliberate or accidental damage).                                                                                                                                                                                                                                                                                                                                                                                                                                                                                                                                                                                         |                                                                                     |



# Refrigerator: vaccine, upright model

| Catalogue Number | Item Name                            | Available on Transversal Contract | Contract Number or Code |
|------------------|--------------------------------------|-----------------------------------|-------------------------|
| PHC-F-050        | Refrigerator: vaccine, upright model | No                                |                         |

|                                    |                                                                                                                                                                                                                                                                                                                                                                                                                                                                                                                                                                                                                                         |                                                                                     |
|------------------------------------|-----------------------------------------------------------------------------------------------------------------------------------------------------------------------------------------------------------------------------------------------------------------------------------------------------------------------------------------------------------------------------------------------------------------------------------------------------------------------------------------------------------------------------------------------------------------------------------------------------------------------------------------|-------------------------------------------------------------------------------------|
| Description                        | Upright refrigerator for vaccine and blood products.                                                                                                                                                                                                                                                                                                                                                                                                                                                                                                                                                                                    |  |
| Use                                | Used to store vaccines and blood products.                                                                                                                                                                                                                                                                                                                                                                                                                                                                                                                                                                                              |                                                                                     |
| Clinical or User Specifications    | <p>Upright refrigerator, minimum 100l. Alternative chest model is available, if more appropriate for the location.</p> <p>This unit is designed to maintain the recommended cold-chain conditions for vaccines and blood products, i.e. must maintain the temperature between specified upper and lower limits. The unit must provide protection against freezing, as freezing will inactivate the vaccine.</p> <p>Will keep temperature low for at least 48 hours, in the event of a power failure, i.e. over a weekend.</p> <p>A separate data-logging thermometer will be used to keep a record of daily temperature variations.</p> |                                                                                     |
| Accessories or Related Consumables | None.                                                                                                                                                                                                                                                                                                                                                                                                                                                                                                                                                                                                                                   |                                                                                     |
| Care                               | Clean interior and exterior with standard cleaning and disinfectant solutions.                                                                                                                                                                                                                                                                                                                                                                                                                                                                                                                                                          |                                                                                     |
| Supplier Warranty                  | 3 years (excluding deliberate or accidental damage).                                                                                                                                                                                                                                                                                                                                                                                                                                                                                                                                                                                    |                                                                                     |

## Screen: bedside, wheeled, complete

| Catalogue Number | Item Name                                       | Available on Transversal Contract | Contract Number or Code |
|------------------|-------------------------------------------------|-----------------------------------|-------------------------|
| PHC-F-063        | Screen: bedside, wheeled. Complete with curtain | RT24-2016                         | RT24-11-009             |

|                                    |                                                                                                                                                |
|------------------------------------|------------------------------------------------------------------------------------------------------------------------------------------------|
| Description                        | Four-panel concertina- foldable screen, consisting of steel frames on castors, and plastic curtains.                                           |
| Use                                | To provide visual privacy when there are no other screening curtains available.                                                                |
| Clinical or User Specifications    | Plastic curtains hinges and curtain hooks should be placed in such a way that there is no opening on the sides of curtains and between panels. |
| Accessories or Related Consumables | Replacement curtains RT24-11-010.                                                                                                              |
| Care                               | Curtains washable. Standard cleaning and disinfection.                                                                                         |
| Supplier Warranty                  | 5 years on frames, 1 year on curtains (excluding deliberate or accidental damage).                                                             |

# Screen: bedside, replacement curtains

| Catalogue Number | Item Name                             | Available on Transversal Contract | Contract Number or Code |
|------------------|---------------------------------------|-----------------------------------|-------------------------|
| PHC-F-064        | Screen: bedside, replacement curtains | RT24-2016                         | RT24-11-010             |

|                                    |                                                                                                                                                           |
|------------------------------------|-----------------------------------------------------------------------------------------------------------------------------------------------------------|
| Description                        | Replacement curtain for 4-panel folding screen on castors.                                                                                                |
| Use                                | To provide visual privacy when there are no other screening curtains available.                                                                           |
| Clinical or User Specifications    | Strong non-transparent plastic, sides to be strengthened, strong non-transparent, sides to be strengthened and curtains to be full fit in frame sections. |
| Accessories or Related Consumables | None.                                                                                                                                                     |
| Care                               | Standard cleaning and disinfection.                                                                                                                       |
| Supplier Warranty                  | 1 year (excluding deliberate or accidental damage).                                                                                                       |

## Stool: anaesthetist

| Catalogue Number | Item Name           | Available on Transversal Contract | Contract Number or Code |
|------------------|---------------------|-----------------------------------|-------------------------|
| PHC-F-034        | Stool: anaesthetist | RT 24                             | RT 24-11-002            |

|                                    |                                                                                                                                                                          |                                                                                     |
|------------------------------------|--------------------------------------------------------------------------------------------------------------------------------------------------------------------------|-------------------------------------------------------------------------------------|
| Description                        | All-metal stool, height-adjustable by rotating seat.                                                                                                                     |  |
| Use                                | To be used during intubation and other emergency procedures.                                                                                                             |                                                                                     |
| Clinical or User Specifications    | Round metal seat – smooth unpainted aluminium.<br>Castor-mounted.<br>Seat height is adjusted up or down by rotating the seat, which is mounted on a robust threaded rod. |                                                                                     |
| Accessories or Related Consumables |                                                                                                                                                                          |                                                                                     |
| Care                               | Standard cleaning and disinfecting.                                                                                                                                      |                                                                                     |
| Supplier Warranty                  | 2 years (excluding deliberate or accidental damage).                                                                                                                     |                                                                                     |

# Stool: dental assistant

| Catalogue Number | Item Name               | Available on Transversal Contract | Contract Number or Code |
|------------------|-------------------------|-----------------------------------|-------------------------|
| PHC-F-065        | Stool: dental assistant |                                   |                         |

|                                    |                                                                                                                                                                                                                                                                                                                                                                   |
|------------------------------------|-------------------------------------------------------------------------------------------------------------------------------------------------------------------------------------------------------------------------------------------------------------------------------------------------------------------------------------------------------------------|
| Description                        | A height-adjustable stool on castors, with an adjustable foot ring and adjustable lumbar support.                                                                                                                                                                                                                                                                 |
| Use                                | Used chair-side by a dental assistant.                                                                                                                                                                                                                                                                                                                            |
| Clinical or User Specifications    | <p>Ergonomic stool. Height adjustment by gas cylinder or spring – lever-operated.</p> <p>Durable upholstery for easy cleaning and durability.</p> <p>2-way adjustable backrest.</p> <p>5-legged base with twin-wheel castors.</p> <p>Adjustable torso support.</p> <p>Height-adjustable foot ring.</p> <p>Must conform to the aesthetics of the dental chair.</p> |
| Accessories or Related Consumables |                                                                                                                                                                                                                                                                                                                                                                   |
| Care                               | Standard cleaning and disinfection.                                                                                                                                                                                                                                                                                                                               |
| Supplier Warranty                  | 5 years (excluding deliberate or accidental damage).                                                                                                                                                                                                                                                                                                              |

## Stool: dentist

| Catalogue Number | Item Name      | Available on Transversal Contract | Contract Number or Code |
|------------------|----------------|-----------------------------------|-------------------------|
| PHC-F-066        | Stool: dentist |                                   |                         |

|                                    |                                                                                                                                                                                                                                                                                                                               |
|------------------------------------|-------------------------------------------------------------------------------------------------------------------------------------------------------------------------------------------------------------------------------------------------------------------------------------------------------------------------------|
| Description                        | An ergonomic stool used by the operator.                                                                                                                                                                                                                                                                                      |
| Use                                | Used chair-side by the dentist or oral hygienist.                                                                                                                                                                                                                                                                             |
| Clinical or User Specifications    | <p>Ergonomic stool. Height adjustment by gas cylinder or spring – lever-operated.</p> <p>Durable upholstery for easy cleaning and durability.</p> <p>2-way adjustable backrest.</p> <p>5-legged base with twin-wheel castors.</p> <p>Adjustable torso support.</p> <p>Must conform to the aesthetics of the dental chair.</p> |
| Accessories or Related Consumables |                                                                                                                                                                                                                                                                                                                               |
| Care                               | Standard cleaning and disinfection.                                                                                                                                                                                                                                                                                           |
| Supplier Warranty                  | 5 years (excluding deliberate or accidental damage).                                                                                                                                                                                                                                                                          |

# Stool: height-adjustable, with backrest

| Catalogue Number | Item Name                                | Available on Transversal Contract | Contract Number or Code |
|------------------|------------------------------------------|-----------------------------------|-------------------------|
| PHC-F-035        | Stool, height-adjustable, with back-rest |                                   |                         |

|                                    |                                                                                                                                                                                                                            |                                                                                     |
|------------------------------------|----------------------------------------------------------------------------------------------------------------------------------------------------------------------------------------------------------------------------|-------------------------------------------------------------------------------------|
| Description                        | All-metal stool, height-adjustable, with backrest.                                                                                                                                                                         |  |
| Use                                | To be used during dental procedures.                                                                                                                                                                                       |                                                                                     |
| Clinical or User Specifications    | Round upholstered seat. Can swivel, but not tilt.<br>Castor-mounted. Castors mounted under a metal ring, which serves as a footrest.<br>Seat height is adjusted up or down by pressing a lever which actuates a gas strut. |                                                                                     |
| Accessories or Related Consumables |                                                                                                                                                                                                                            |                                                                                     |
| Care                               | Standard cleaning and disinfecting.                                                                                                                                                                                        |                                                                                     |
| Supplier Warranty                  | 2 years (excluding deliberate or accidental damage).                                                                                                                                                                       |                                                                                     |

## Table: over- bed

| Catalogue Number | Item Name        | Available on Transversal Contract | Contract Number or Code |
|------------------|------------------|-----------------------------------|-------------------------|
| PHC-F-075        | Table: over- bed | RT24-2016                         | RT24-07-003             |

|                                    |                                                                                                                                                                                                                                                                                           |                                                                                     |
|------------------------------------|-------------------------------------------------------------------------------------------------------------------------------------------------------------------------------------------------------------------------------------------------------------------------------------------|-------------------------------------------------------------------------------------|
| Description                        | Overbed table, cantilever type.                                                                                                                                                                                                                                                           |  |
| Use                                | Used to serve patients meals and medications.                                                                                                                                                                                                                                             |                                                                                     |
| Clinical or User Specifications    | <p>Can be slid into position from the side of the bed, due to cantilever design.</p> <p>Adjustable height from 740 mm to 1 090 mm. Automatic lock.</p> <p>Height must be adjustable by patient.</p> <p>Bonded wood melamine resin surface table-top with aluminium or similar edging.</p> |                                                                                     |
| Accessories or Related Consumables |                                                                                                                                                                                                                                                                                           |                                                                                     |
| Care                               | Standard cleaning and disinfection.                                                                                                                                                                                                                                                       |                                                                                     |
| Supplier Warranty                  | 2 years.                                                                                                                                                                                                                                                                                  |                                                                                     |



# Trolley: anaesthetic

| Catalogue Number | Item Name            | Available on Transversal Contract | Contract Number or Code |
|------------------|----------------------|-----------------------------------|-------------------------|
| PHC-F-036        | Trolley: anaesthetic | RT 24                             | RT 24-12-005            |

|                                    |                                                          |                                                                                     |
|------------------------------------|----------------------------------------------------------|-------------------------------------------------------------------------------------|
| Description                        | Trolley, anaesthetic.                                    |  |
| Use                                | To be used as couch-side trolley in consulting rooms.    |                                                                                     |
| Clinical or User Specifications    | Stainless steel trolley, with single drawer. On castors. |                                                                                     |
| Accessories or Related Consumables |                                                          |                                                                                     |
| Care                               | Standard cleaning and disinfecting.                      |                                                                                     |
| Supplier Warranty                  | 2 years (excluding deliberate or accidental damage).     |                                                                                     |

## Trolley: emergency

| Catalogue Number | Item Name          | Available on Transversal Contract | Contract Number or Code |
|------------------|--------------------|-----------------------------------|-------------------------|
| PHC-F-040        | Trolley: emergency | RT 24-2016                        | RT 24-12-001            |

|                                    |                                                                                                                                                                                                                                                                                                                                                                                                                                                  |                                                                                     |
|------------------------------------|--------------------------------------------------------------------------------------------------------------------------------------------------------------------------------------------------------------------------------------------------------------------------------------------------------------------------------------------------------------------------------------------------------------------------------------------------|-------------------------------------------------------------------------------------|
| Description                        | Emergency trolley ("crash cart").                                                                                                                                                                                                                                                                                                                                                                                                                |  |
| Use                                | <p>For use in emergencies and resuscitations.</p> <p>The trolley should be so configured, that it has all of the essential resuscitation equipment and drugs on board. If it becomes necessary to resuscitate a collapsed patient who cannot be moved, the trolley can then be moved to the patient.</p> <p>The first responder will have everything to hand on the trolley.</p>                                                                 |                                                                                     |
| Clinical or User Specifications    | <p>The trolley has dedicated space or attachments for all equipment and consumables required in an emergency.</p> <p>The trolley will be stocked with the necessary items, as stipulated in the Framework Document.</p>                                                                                                                                                                                                                          |                                                                                     |
| Accessories or Related Consumables | <p>Cardiac board, drugs insert, laryngoscope and ET tube insert.</p> <p>Half-height plastic bins for syringes and needles. Drawer dividers optional.</p>                                                                                                                                                                                                                                                                                         |                                                                                     |
| Care                               | <p>Stock each drawer against a standard checklist, so that the configuration of the trolley is standard in every PHC facility.</p> <p>Check the contents of the trolley, including the drug drawer, daily.</p> <p>Lock the drug drawer and apply a tamper-proof seal, after each inspection.</p> <p>Test the attached monitor and AED daily.</p> <p>Keep an oxygen cylinder on a trolley nearby.</p> <p>Replenish used items after each use.</p> |                                                                                     |
| Supplier Warranty                  | 2 years (excluding deliberate or accidental damage).                                                                                                                                                                                                                                                                                                                                                                                             |                                                                                     |

# Trolley: gas cylinder

| Catalogue Number | Item Name             | Available on Transversal Contract | Contract Number or Code |
|------------------|-----------------------|-----------------------------------|-------------------------|
| PHC-F-041        | Trolley: gas cylinder | RT 24                             | RT 24-12-003            |

|                                    |                                                                                               |                                                                                     |
|------------------------------------|-----------------------------------------------------------------------------------------------|-------------------------------------------------------------------------------------|
| Description                        | Trolley, gas cylinder.                                                                        |  |
| Use                                | To be used for moving a standard oxygen cylinder.                                             |                                                                                     |
| Clinical or User Specifications    | Trolley on wheels. Stable in vertical position.<br>To fit medium cylinder available on RT 50. |                                                                                     |
| Accessories or Related Consumables |                                                                                               |                                                                                     |
| Care                               | Standard cleaning and disinfecting.                                                           |                                                                                     |
| Supplier Warranty                  | 2 years (excluding deliberate or accidental damage).                                          |                                                                                     |

## Trolley: medical dressing, large

| Catalogue Number | Item Name                        | Available on Transversal Contract | Contract Number or Code |
|------------------|----------------------------------|-----------------------------------|-------------------------|
| PHC-F-039        | Trolley: medical dressing, large | RT 24                             | RT 24-12-008            |

|                                    |                                                                                            |                                                                                     |
|------------------------------------|--------------------------------------------------------------------------------------------|-------------------------------------------------------------------------------------|
| Description                        | Trolley, medical dressing, large.                                                          |  |
| Use                                | General purpose medical dressing trolley.                                                  |                                                                                     |
| Clinical or User Specifications    | Stainless steel trolley, with two open shelves.<br>Guard rails around shelves. On castors. |                                                                                     |
| Accessories or Related Consumables |                                                                                            |                                                                                     |
| Care                               | Standard cleaning and disinfecting.                                                        |                                                                                     |
| Supplier Warranty                  | 2 years (excluding deliberate or accidental damage).                                       |                                                                                     |

# Trolley: medical instruments, medium

| Catalogue Number | Item Name                            | Available on Transversal Contract | Contract Number or Code |
|------------------|--------------------------------------|-----------------------------------|-------------------------|
| PHC-F-038        | Trolley, medical instruments, medium | RT 24                             | RT 24-12-013            |

|                                    |                                                                                     |                                                                                     |
|------------------------------------|-------------------------------------------------------------------------------------|-------------------------------------------------------------------------------------|
| Description                        | Trolley, medical instruments, medium.                                               |  |
| Use                                | General purpose medical dressing trolley.                                           |                                                                                     |
| Clinical or User Specifications    | Stainless steel, with two open stainless steel shelves. No guard rails. On castors. |                                                                                     |
| Accessories or Related Consumables |                                                                                     |                                                                                     |
| Care                               | Standard cleaning and disinfecting.                                                 |                                                                                     |
| Supplier Warranty                  | 2 years (excluding deliberate or accidental damage).                                |                                                                                     |

## Trolley: medical dressing, small

| Catalogue Number | Item Name                        | Available on Transversal Contract | Contract Number or Code |
|------------------|----------------------------------|-----------------------------------|-------------------------|
| PHC-F-037        | Trolley: medical dressing, small | RT 24                             | RT 24-12-009            |

|                                    |                                                                                                    |                                                                                     |
|------------------------------------|----------------------------------------------------------------------------------------------------|-------------------------------------------------------------------------------------|
| Description                        | Trolley, medical dressing small.                                                                   |  |
| Use                                | General purpose medical dressing trolley.                                                          |                                                                                     |
| Clinical or User Specifications    | Mild steel trolley, with two open stainless steel shelves. Guard rails around shelves. On castors. |                                                                                     |
| Accessories or Related Consumables |                                                                                                    |                                                                                     |
| Care                               | Standard cleaning and disinfecting.                                                                |                                                                                     |
| Supplier Warranty                  | 2 years (excluding deliberate or accidental damage).                                               |                                                                                     |

## Trolley: medical dressing with bucket and bowl attachment

| Catalogue Number | Item Name                                                 | Available on Transversal Contract | Contract Number or Code |
|------------------|-----------------------------------------------------------|-----------------------------------|-------------------------|
| PHC-F-044        | Trolley: medical dressing with bucket and bowl attachment | RT 24-2016                        | RT 24-12-010            |

|                                    |                                                                                                                                                                                                                                                                       |
|------------------------------------|-----------------------------------------------------------------------------------------------------------------------------------------------------------------------------------------------------------------------------------------------------------------------|
| Description                        | <p>Medical dressing trolley on castors, with two shelves, a bowl and a bucket.</p>                                                                                                 |
| Use                                | Generally used in a procedure room, where instruments require rinsing during the procedure.                                                                                                                                                                           |
| Clinical or User Specifications    | Trolley has two stainless steel shelves. Top shelf has a guard rail on all four sides, bottom shelf has no rail. On one end, the trolley has an upper bracket to accommodate a stainless steel bowl, and below that another bracket to hold a stainless steel bucket. |
| Accessories or Related Consumables | Supplied complete with bowl and bucket.                                                                                                                                                                                                                               |
| Care                               | Standard cleaning and disinfecting.                                                                                                                                                                                                                                   |
| Supplier Warranty                  | 2 years (excluding deliberate or accidental damage).                                                                                                                                                                                                                  |

# Trolley: patient, with mattress

| Catalogue Number | Item Name                                | Available on Transversal Contract | Contract Number or Code |
|------------------|------------------------------------------|-----------------------------------|-------------------------|
| PHC-F-051        | Trolley: patient, complete with mattress | RT 24                             | RT 24-12-018            |

|                                    |                                                                                                                                                                                                                                     |                                                                                     |
|------------------------------------|-------------------------------------------------------------------------------------------------------------------------------------------------------------------------------------------------------------------------------------|-------------------------------------------------------------------------------------|
| Description                        | Trolley, patient.                                                                                                                                                                                                                   |  |
| Use                                | To be used when moving a patient who must remain horizontal.                                                                                                                                                                        |                                                                                     |
| Clinical or User Specifications    | Trolley on castors, two swivelling and two fixed (with brakes).<br>Adjustable backrest. Collapsible safety sides. Stainless steel top.<br>Compatible mattress, 1 780x530x120mm.<br>Replaceable waterproof, non-slip mattress cover. |                                                                                     |
| Accessories or Related Consumables | Safety sides, drip rod, oxygen cylinder holder.<br>Mattress for patient trolley PHC-F-052.<br>Cover for Mattress PHC-F-053.                                                                                                         |                                                                                     |
| Care                               | Standard cleaning and disinfecting.                                                                                                                                                                                                 |                                                                                     |
| Supplier Warranty                  | 2 years (excluding deliberate or accidental damage).                                                                                                                                                                                |                                                                                     |



# Trolley: soiled instruments and linen

| Catalogue Number | Item Name                                       | Available on Transversal Contract | Contract Number or Code |
|------------------|-------------------------------------------------|-----------------------------------|-------------------------|
| PHC-F-054        | Trolley: soiled instruments and linen, complete | RT 24-2016                        | RT 24-12-027            |

|                                    |                                                                                                                                                                                                                                                                                                                                                      |                                                                                     |
|------------------------------------|------------------------------------------------------------------------------------------------------------------------------------------------------------------------------------------------------------------------------------------------------------------------------------------------------------------------------------------------------|-------------------------------------------------------------------------------------|
| Description                        | <p>Trolley with three shelves for soiled instruments plus a polyester receptacle for soiled linen.</p>                                                                                                                                                                                                                                               |  |
| Use                                | To gather up soiled instruments and linen, after a procedure.                                                                                                                                                                                                                                                                                        |                                                                                     |
| Clinical or User Specifications    | <p>The trolley has a large polyester receptacle for soiled linen, held in the open position on the frame by a retainer. Soiled linen can easily be inserted.</p> <p>Alongside the receptacle are three stainless steel shelves, to accommodate soiled instruments.</p> <p>The trolley is castor-mounted for easy movement into and out of rooms.</p> |                                                                                     |
| Accessories or Related Consumables | Spare polyester linen receptacle. PHC-F-055.                                                                                                                                                                                                                                                                                                         |                                                                                     |
| Care                               | <p>Clean after use as with standard cleaning and disinfectant solutions.</p> <p>The polyester receptacle is washable. A second receptacle permits rapid turnaround of the trolley.</p>                                                                                                                                                               |                                                                                     |
| Supplier Warranty                  | 2 years on all components (excluding deliberate or accidental damage).                                                                                                                                                                                                                                                                               |                                                                                     |

## Trolley: soiled linen, complete

| Catalogue Number | Item Name                       | Available on Transversal Contract | Contract Number or Code |
|------------------|---------------------------------|-----------------------------------|-------------------------|
| PHC-F-056        | Trolley: soiled linen, complete | RT 24-2016                        | RT 24-12-030            |

|                                    |                                                                                                                                |                                                                                     |
|------------------------------------|--------------------------------------------------------------------------------------------------------------------------------|-------------------------------------------------------------------------------------|
| Description                        | Soiled linen trolley.                                                                                                          |  |
| Use                                | For removal of soiled linen.                                                                                                   |                                                                                     |
| Clinical or User Specifications    | The trolley holds a large woven polyester linen bag.<br>The trolley is castor-mounted for easy movement into and out of rooms. |                                                                                     |
| Accessories or Related Consumables | Replaceable polyester bag, with draw cord. PHC F-057.                                                                          |                                                                                     |
| Care                               | Clean after use with standard cleaning and disinfectant solutions.<br>Polyester bag is washable.                               |                                                                                     |
| Supplier Warranty                  | 2 years on all components (excluding deliberate or accidental damage).                                                         |                                                                                     |

## Viewing box: X-ray

| Catalogue Number | Item Name          | Available on Transversal Contract | Contract Number or Code |
|------------------|--------------------|-----------------------------------|-------------------------|
| PHC-F-042        | Viewing box: X-ray | RT 24                             | RT 24-12-013            |

|                                    |                                                                                                                                 |
|------------------------------------|---------------------------------------------------------------------------------------------------------------------------------|
| Description                        | Illuminated viewing box to enhance x-rays.                                                                                      |
| Use                                | Use in circumstances where X-ray films are still in use.                                                                        |
| Clinical or User Specifications    | Viewer box for single full-size x-ray film.<br>Separate switch for higher-intensity lamp, to brighten area of interest on film. |
| Accessories or Related Consumables | None.                                                                                                                           |
| Care                               | Clean with standard cleaning and disinfectant solutions.<br>Contact departmental technical personnel if bulbs burn out.         |
| Supplier Warranty                  | 1 year (deliberate or accidental damage excluded).                                                                              |

## Wheelchair: porter

| Catalogue Number | Item Name          | Available on Transversal Contract | Contract Number or Code |
|------------------|--------------------|-----------------------------------|-------------------------|
| PHC-F-024        | Wheelchair: porter | RT 233-2017                       | 42192210-00259          |

|                                    |                                                                   |                                                                                     |
|------------------------------------|-------------------------------------------------------------------|-------------------------------------------------------------------------------------|
| Description                        | Wheelchair, porter.                                               |  |
| Use                                | For transport of disabled patients who do not require to recline. |                                                                                     |
| Clinical or User Specifications    |                                                                   |                                                                                     |
| Accessories or Related Consumables |                                                                   |                                                                                     |
| Care                               | Standard cleaning and disinfecting.                               |                                                                                     |
| Supplier Warranty                  | 2 years (excluding deliberate or accidental damage).              |                                                                                     |

# General

## Chair: office

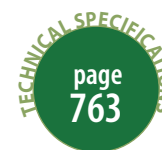

| Catalogue Number | Item Name     | Available on Transversal Contract | Contract Number or Code |
|------------------|---------------|-----------------------------------|-------------------------|
| PHC-F-001        | Chair: office | No                                |                         |

|                                    |                                                                                                                                                                                                                                                                                                                   |                                                                                      |
|------------------------------------|-------------------------------------------------------------------------------------------------------------------------------------------------------------------------------------------------------------------------------------------------------------------------------------------------------------------|--------------------------------------------------------------------------------------|
| Description                        | Office chair.                                                                                                                                                                                                                                                                                                     |  |
| Use                                | For use by administrative staff.                                                                                                                                                                                                                                                                                  |                                                                                      |
| Clinical or User Specifications    | Durable, comfortable seating. No arms. Height-adjustable, swivel and tilt.<br>Adequate support for good posture, suitable for prolonged use during working hours.<br>Castor-mounted on 5-star base. Allows maximum mobility of the user.<br>Mesh back prevents heat build-up and discomfort in warm environments. |                                                                                      |
| Accessories or Related Consumables | None.                                                                                                                                                                                                                                                                                                             |                                                                                      |
| Care                               | Standard cleaning and disinfection.                                                                                                                                                                                                                                                                               |                                                                                      |
| Supplier Warranty                  | 2 years on seat.<br>5 years on frame and back.                                                                                                                                                                                                                                                                    |                                                                                      |

## Chair: operator

| Catalogue Number | Item Name                  | Available on Transversal Contract | Contract Number or Code |
|------------------|----------------------------|-----------------------------------|-------------------------|
| PHC-F-002        | Chair: operator, high back | No                                |                         |

|                                    |                                                                                                                                                                                                                                                                                                                   |                                                                                     |
|------------------------------------|-------------------------------------------------------------------------------------------------------------------------------------------------------------------------------------------------------------------------------------------------------------------------------------------------------------------|-------------------------------------------------------------------------------------|
| Description                        | Operator mesh back chair.                                                                                                                                                                                                                                                                                         |  |
| Use                                | For use by clinicians.                                                                                                                                                                                                                                                                                            |                                                                                     |
| Clinical or User Specifications    | Durable, comfortable seating. No arms. Height-adjustable, swivel and tilt.<br>Adequate support for good posture, suitable for prolonged use during working hours.<br>Castor-mounted on 5-star base. Allows maximum mobility of the user.<br>Mesh back prevents heat build-up and discomfort in warm environments. |                                                                                     |
| Accessories or Related Consumables | None.                                                                                                                                                                                                                                                                                                             |                                                                                     |
| Care                               | Standard cleaning and disinfection.                                                                                                                                                                                                                                                                               |                                                                                     |
| Supplier Warranty                  | 2 years on seat.<br>5 years on frame and back.                                                                                                                                                                                                                                                                    |                                                                                     |

## Chair: stackable, metal frame

| Catalogue Number | Item Name        | Available on Transversal Contract | Contract Number or Code |
|------------------|------------------|-----------------------------------|-------------------------|
| PHC-F-003        | Chair: stackable | No                                |                         |

|                                    |                                                                                                                                                           |                                                                                     |
|------------------------------------|-----------------------------------------------------------------------------------------------------------------------------------------------------------|-------------------------------------------------------------------------------------|
| Description                        | Stackable chair with metal frame with ABS back and seat shell.                                                                                            |  |
| Use                                | Multipurpose chair, for use in temporary seating arrangements.                                                                                            |                                                                                     |
| Clinical or User Specifications    | Powder-coated metal frame. Anti-tilt design.<br>One-piece ABS plastic back and seat shell.<br>Rubber ferrules on feet.<br>Stackable for storage purposes. |                                                                                     |
| Accessories or Related Consumables | None.                                                                                                                                                     |                                                                                     |
| Care                               | Standard cleaning and disinfection.                                                                                                                       |                                                                                     |
| Supplier Warranty                  | 3 years on frame and shell.                                                                                                                               |                                                                                     |

## Chair: stackable, netted mid-back

| Catalogue Number | Item Name                         | Available on Transversal Contract | Contract Number or Code |
|------------------|-----------------------------------|-----------------------------------|-------------------------|
| PHC-F-004        | Chair, stackable, netted mid-back | No                                |                         |

|                                    |                                                                                                                                                        |                                                                                     |
|------------------------------------|--------------------------------------------------------------------------------------------------------------------------------------------------------|-------------------------------------------------------------------------------------|
| Description                        | Occasional chair.                                                                                                                                      |  |
| Use                                | For use in multipurpose rooms.                                                                                                                         |                                                                                     |
| Clinical or User Specifications    | Durable, comfortable seating. Strong frame. Non-scratch rubber floor protectors. Mesh back prevents heat build-up and discomfort in warm environments. |                                                                                     |
| Accessories or Related Consumables | None.                                                                                                                                                  |                                                                                     |
| Care                               | Standard cleaning and disinfection.                                                                                                                    |                                                                                     |
| Supplier Warranty                  | 2 years on seat.<br>5 years on frame and back.                                                                                                         |                                                                                     |



## Chair: visitor

| Catalogue Number | Item Name                | Available on Transversal Contract | Contract Number or Code |
|------------------|--------------------------|-----------------------------------|-------------------------|
| PHC-F-005        | Chair: visitor, mid back | No                                |                         |

|                                    |                                                                                  |                                                                                     |
|------------------------------------|----------------------------------------------------------------------------------|-------------------------------------------------------------------------------------|
| Description                        | Visitor chair.                                                                   |  |
| Use                                | Chair without arm rests for use by patients in consulting rooms and offices.     |                                                                                     |
| Clinical or User Specifications    | Durable, comfortable seating. Strong frame. Non-scratch rubber floor protectors. |                                                                                     |
| Accessories or Related Consumables |                                                                                  |                                                                                     |
| Care                               | Standard cleaning and disinfection.                                              |                                                                                     |
| Supplier Warranty                  | 2 years on seat.<br>5 years on frame and back.                                   |                                                                                     |

# Credenza

| Catalogue Number | Item Name | Available on Transversal Contract | Contract Number or Code |
|------------------|-----------|-----------------------------------|-------------------------|
| PHC-F-006        | Credenza  | No                                |                         |

|                                    |                                                                                                                                                                                                                                                                                      |                                                                                     |
|------------------------------------|--------------------------------------------------------------------------------------------------------------------------------------------------------------------------------------------------------------------------------------------------------------------------------------|-------------------------------------------------------------------------------------|
| Description                        | Office credenza.                                                                                                                                                                                                                                                                     |  |
| Use                                | For use by operational manager.                                                                                                                                                                                                                                                      |                                                                                     |
| Clinical or User Specifications    | <p>Construction and materials to match L-shaped desk.</p> <p>Light grey top and sides of carcass, darker grey accents.</p> <p>Double doors of same material and colour as sides and top.</p> <p>Two shelves, adjustable spacing.</p> <p>Height to match height of L-shaped desk.</p> |                                                                                     |
| Accessories or Related Consumables | 2 keys.                                                                                                                                                                                                                                                                              |                                                                                     |
| Care                               | Standard cleaning and disinfection.                                                                                                                                                                                                                                                  |                                                                                     |
| Supplier Warranty                  | 5 years on all components (excluding accidental or deliberate damage).                                                                                                                                                                                                               |                                                                                     |

# Cupboard: sterile stock

| Catalogue Number | Item Name              | Available on Transversal Contract | Contract Number or Code |
|------------------|------------------------|-----------------------------------|-------------------------|
| PHC-F-011        | Sterile stock cupboard | No                                |                         |

|                                    |                                                                                                                                                                                                                                     |                                                                                     |
|------------------------------------|-------------------------------------------------------------------------------------------------------------------------------------------------------------------------------------------------------------------------------------|-------------------------------------------------------------------------------------|
| Description                        | Cabinet for storing packs and instruments.                                                                                                                                                                                          |  |
| Use                                | Used to store packs and autoclaveable instruments after sterilisation.                                                                                                                                                              |                                                                                     |
| Clinical or User Specifications    | All-steel cabinet, with lockable double doors. Doors have glass panes to permit view of contents without opening.<br>Six Shelves.<br>Rubber ferrules on feet, or rubber floor protectors.<br>Antibacterial coating on the interior. |                                                                                     |
| Accessories or Related Consumables | Key and spare key.                                                                                                                                                                                                                  |                                                                                     |
| Care                               | Clean according to the supplier's instructions, to preserve the antibacterial coating.                                                                                                                                              |                                                                                     |
| Supplier Warranty                  | 2 years on cabinet itself (excluding deliberate or accidental damage).<br>5 years on locks, lock bars, hinges and handles.                                                                                                          |                                                                                     |

## Desk: 3-drawer, L-shaped

| Catalogue Number | Item Name     | Available on Transversal Contract | Contract Number or Code |
|------------------|---------------|-----------------------------------|-------------------------|
| PHC-F-007        | Desk: L-shape | No                                |                         |

|                                    |                                                                                                                                                                                                                                                                                                                                                                                                                                                                                                                                                         |                                                                                    |
|------------------------------------|---------------------------------------------------------------------------------------------------------------------------------------------------------------------------------------------------------------------------------------------------------------------------------------------------------------------------------------------------------------------------------------------------------------------------------------------------------------------------------------------------------------------------------------------------------|------------------------------------------------------------------------------------|
| Description                        | L-shaped desk.                                                                                                                                                                                                                                                                                                                                                                                                                                                                                                                                          |  |
| Use                                | For use by clinicians and clinic manager.                                                                                                                                                                                                                                                                                                                                                                                                                                                                                                               |                                                                                    |
| Clinical or User Specifications    | <p>The desk is designed to provide adequate space for clinical purposes, without occupying unnecessary space in a room.</p> <p>Light grey top, darker grey accents.</p> <p>The design will allow the clinician maximum freedom, in moving from examination couch to desk and back.</p> <p>For infection control purposes, the desk will be fixed in position, attached to a wall. Attachment will be performed by your own maintenance team, not by the supplier.</p> <p>Drawer unit with three drawers, can be located on either side of the desk.</p> |                                                                                    |
| Accessories or Related Consumables | <p>Keys for lockable drawer.</p> <p>Pen and pencil tray for top drawer.</p>                                                                                                                                                                                                                                                                                                                                                                                                                                                                             |                                                                                    |
| Care                               | Standard cleaning and disinfection.                                                                                                                                                                                                                                                                                                                                                                                                                                                                                                                     |                                                                                    |
| Supplier Warranty                  | 5 years on all components (excluding accidental or deliberate damage).                                                                                                                                                                                                                                                                                                                                                                                                                                                                                  |                                                                                    |

## Desk: rectangular

| Catalogue Number | Item Name         | Available on Transversal Contract | Contract Number or Code |
|------------------|-------------------|-----------------------------------|-------------------------|
| PHC-F-008        | Desk: rectangular | No                                |                         |

|                                    |                                                                                                                                                                                                                                                                                                                                                                                                                                                                                                      |                                                                                     |
|------------------------------------|------------------------------------------------------------------------------------------------------------------------------------------------------------------------------------------------------------------------------------------------------------------------------------------------------------------------------------------------------------------------------------------------------------------------------------------------------------------------------------------------------|-------------------------------------------------------------------------------------|
| Description                        | Rectangular desk.                                                                                                                                                                                                                                                                                                                                                                                                                                                                                    |  |
| Use                                | For use in rooms other than consulting rooms.                                                                                                                                                                                                                                                                                                                                                                                                                                                        |                                                                                     |
| Clinical or User Specifications    | <p>The desk is designed to provide adequate space for recording vital signs, without occupying unnecessary space in a room. Can also be used in administrative areas.</p> <p>Light grey top, darker grey accents.</p> <p>Two drawers, to hold additional cuffs, testing equipment and materials.</p> <p>If space permits, for infection control purposes, the desk will be fixed in position, attached to a wall. Attachment will be performed by your own maintenance team, not by the supplier</p> |                                                                                     |
| Accessories or Related Consumables | None.                                                                                                                                                                                                                                                                                                                                                                                                                                                                                                |                                                                                     |
| Care                               | Standard cleaning and disinfection.                                                                                                                                                                                                                                                                                                                                                                                                                                                                  |                                                                                     |
| Supplier Warranty                  | 5 years on all components (excluding accidental or deliberate damage).                                                                                                                                                                                                                                                                                                                                                                                                                               |                                                                                     |

# Filing Cabinet: bulk

| Catalogue Number | Item Name           | Available on Transversal Contract | Contract Number or Code |
|------------------|---------------------|-----------------------------------|-------------------------|
| PHC-F-009        | Filing system, bulk | No                                |                         |

|             |                                                                                                                                                                                                                                                                                                                                                                                                                                                                                                                                                                                                                                                                                                                                                                                                                                                                                                                                                                                                                                                                                                                                                                                                                                                                                                                                                                              |                                                                                     |
|-------------|------------------------------------------------------------------------------------------------------------------------------------------------------------------------------------------------------------------------------------------------------------------------------------------------------------------------------------------------------------------------------------------------------------------------------------------------------------------------------------------------------------------------------------------------------------------------------------------------------------------------------------------------------------------------------------------------------------------------------------------------------------------------------------------------------------------------------------------------------------------------------------------------------------------------------------------------------------------------------------------------------------------------------------------------------------------------------------------------------------------------------------------------------------------------------------------------------------------------------------------------------------------------------------------------------------------------------------------------------------------------------|-------------------------------------------------------------------------------------|
| Description | High-density filing system.                                                                                                                                                                                                                                                                                                                                                                                                                                                                                                                                                                                                                                                                                                                                                                                                                                                                                                                                                                                                                                                                                                                                                                                                                                                                                                                                                  |  |
| Use         | <p>The most space-efficient method of storing large numbers of files or folders. The files are stored vertically, with the long side supported on the shelf, and the open side at the top. The short side facing the user, should have a self-adhesive label applied, containing the approved serial number of the file, to permit easy retrieval and re-filing.</p> <p>Vertical steel dividers placed at intervals along the shelf, prevent the files from falling over if several files are retrieved.</p> <p>To avoid excessive searching among cabinets, the user should develop a disciplined retrieval order, from first to last cabinet.</p> <p>Ensure that no other user is standing between cabinets, before moving them.</p> <p>When a file is retrieved, a brightly-coloured file-out card is inserted as a place-holder, to facilitate re-filing. The card also serves as a visual cue for a missing file.</p> <p>Calculation of requirements:</p> <p>Number of active files + number of expected new files per year estimate for 5 years) divided by 100 = number of linear metres of filing (each file = 1cm). Divide by the number of linear metres per cabinet (typically 7.2m., may vary by model) = number of cabinets</p> <p>Dividers: number of bays X 6 shelves per bay X 12 dividers per shelf</p> <p>File-out cards: Daily headcount + 10% extra.</p> |                                                                                     |

|                                 |                                                                                                                                                                                                                                                                                                                                                                                                                                                                                                                                                                                                                                                                                                                                                                                                                                                                                                                                                                                                                                                                                                                                                                                                                                                                                                                                                                                                                                                                                                                                                                                                                                                                                                                                                                                                                                                                                                                                       |
|---------------------------------|---------------------------------------------------------------------------------------------------------------------------------------------------------------------------------------------------------------------------------------------------------------------------------------------------------------------------------------------------------------------------------------------------------------------------------------------------------------------------------------------------------------------------------------------------------------------------------------------------------------------------------------------------------------------------------------------------------------------------------------------------------------------------------------------------------------------------------------------------------------------------------------------------------------------------------------------------------------------------------------------------------------------------------------------------------------------------------------------------------------------------------------------------------------------------------------------------------------------------------------------------------------------------------------------------------------------------------------------------------------------------------------------------------------------------------------------------------------------------------------------------------------------------------------------------------------------------------------------------------------------------------------------------------------------------------------------------------------------------------------------------------------------------------------------------------------------------------------------------------------------------------------------------------------------------------------|
| Clinical or User Specifications | <p>Mobile steel cabinets (called bays) with adjustable horizontal shelves. The cabinets move forward and backward only, as their wheels run in steel rails which are fixed to the floor, and levelled by the supplier, to provide a low-friction platform for motion. The space between the rails is filled with carpeted panels, to provide hindrance-free movement for users.</p> <p>At the end of the working day, the cabinets are pushed to the fully-closed position, and locked.</p> <p>The cabinets may have physical devices to make forward and backward movement easier by a smaller user.</p> <p>The cabinets have sufficient friction to prevent uncontrolled movement.</p> <p>Cabinets vary in size according to the manufacturer, but are approximately 2200mm high X 1000 to 1200mm wide. There are two standard depths: 360mm and 430mm. The greater depth is required for pull-out filing systems, and is not recommended for use with lateral files – the greater depth is wasted (and more expensive).</p> <p>The track length is normally calculated as the sum of the depths of all the required cabinets, plus 800mm access room. However, it is recommended that the access room should be a minimum of 1000mm.</p> <p>The bottom shelf is not usable for lateral files, and should be reserved for filing consumables and accessories.</p> <p>In rooms with low ceilings, it may be possible to have cabinets custom manufactured to a lower height.</p> <p>N.B. When fully loaded, such a system may exceed the weight-carrying capacity of the floor, and cause damage to the floor. The floor should be certified by the Provincial engineering personnel, before finalising procurement.</p> <p>In a smaller room, it may be necessary to mount cabinets in tandem, i.e. two side-by-side. The middle bays (i.e. excluding first and last) are usually bolted back to back, for improved efficiency.</p> |
| Accessories/related consumables | <p>Vertical dividers, steel PHC-F-010.</p> <p>File-out cards PHC-C-005.</p> <p>Side-access files and self-adhesive file labels (see Consumables – General – Stationery).</p>                                                                                                                                                                                                                                                                                                                                                                                                                                                                                                                                                                                                                                                                                                                                                                                                                                                                                                                                                                                                                                                                                                                                                                                                                                                                                                                                                                                                                                                                                                                                                                                                                                                                                                                                                          |
| Care                            | <p>Clean with standard cleaning solutions and dusting.</p> <p>Lock at end of working day, in compliance with POPPI Act.</p> <p>Visually inspect for file-out cards (i.e. misfiled or missing files) weekly.</p> <p>Archive files according to the Archiving policy – the system cannot expand indefinitely.</p> <p>Do not force cabinets if movement becomes difficult – contact the supplier.</p>                                                                                                                                                                                                                                                                                                                                                                                                                                                                                                                                                                                                                                                                                                                                                                                                                                                                                                                                                                                                                                                                                                                                                                                                                                                                                                                                                                                                                                                                                                                                    |
| Maintenance                     | <p>Any adjustments (cabinets distorted, difficult to move or lock) must be carried out by the supplier.</p>                                                                                                                                                                                                                                                                                                                                                                                                                                                                                                                                                                                                                                                                                                                                                                                                                                                                                                                                                                                                                                                                                                                                                                                                                                                                                                                                                                                                                                                                                                                                                                                                                                                                                                                                                                                                                           |
| Supplier Warranty               | <p>5 years (excluding deliberate or accidental damage).</p>                                                                                                                                                                                                                                                                                                                                                                                                                                                                                                                                                                                                                                                                                                                                                                                                                                                                                                                                                                                                                                                                                                                                                                                                                                                                                                                                                                                                                                                                                                                                                                                                                                                                                                                                                                                                                                                                           |

## Filing cabinet: four-drawer

| Catalogue Number | Item Name                | Available on Transversal Contract | Contract Number or Code |
|------------------|--------------------------|-----------------------------------|-------------------------|
| PHC-F-012        | Filing cabinet, 4-drawer | No                                |                         |

|                                 |                                                                                                                                                                                                                      |                                                                                     |
|---------------------------------|----------------------------------------------------------------------------------------------------------------------------------------------------------------------------------------------------------------------|-------------------------------------------------------------------------------------|
| Description                     | 4-drawer filing cabinet.                                                                                                                                                                                             |  |
| Use                             | For use in limited space situations, and for use in OM office for personnel records, etc. File containers are placed in each drawer, to prevent files from falling over and sliding around, when drawer is not full. |                                                                                     |
| Clinical or User Specifications | All-steel construction.<br>Four drawers.<br>Single lock with internal locking mechanism to secure all four drawers.                                                                                                  |                                                                                     |
| Accessories/related consumables | 2 keys.<br>File containers PHC-C-006.<br>Top-access files and self-adhesive file labels (see Consumables – General – Stationery).                                                                                    |                                                                                     |
| Care                            | Clean with standard cleaning solutions and dusting.<br>Lock at end of working day, in compliance with POPI Act.                                                                                                      |                                                                                     |
| Maintenance                     | Not required in normal use.                                                                                                                                                                                          |                                                                                     |
| Supplier Warranty               | 5 years (excluding deliberate or accidental damage).                                                                                                                                                                 |                                                                                     |



# Floor polisher: electric, single disc

| Catalogue Number | Item Name                             | Available on Transversal Contract | Contract Number or Code |
|------------------|---------------------------------------|-----------------------------------|-------------------------|
| PHC-F-020        | Floor polisher: electric, single disc | No                                |                         |

|                                    |                                                                                                                                                                                                                      |                                                                                     |
|------------------------------------|----------------------------------------------------------------------------------------------------------------------------------------------------------------------------------------------------------------------|-------------------------------------------------------------------------------------|
| Description                        | Electric floor scrubber and polisher.                                                                                                                                                                                |  |
| Use                                | For cleaning of floors and removing old polish or sealants.                                                                                                                                                          |                                                                                     |
| Clinical or User Specifications    | Heavy-duty electric single rotary disc machine.<br>The weight of the machine is sufficient to ensure a thorough cleaning and scrubbing action.<br>Different discs for polishing, scrubbing or removing old sealants. |                                                                                     |
| Accessories or Related Consumables | General purpose cleaning disc PHC-C-208.<br>Scouring disc for removing old finish PHC-C-209.                                                                                                                         |                                                                                     |
| Care                               | Standard cleaning and disinfection.<br>Change discs when worn, or for different uses.<br>If cable is damaged or worn, contact maintenance personnel.                                                                 |                                                                                     |
| Supplier Warranty                  | 2 years on all components except discs (excluding deliberate or accidental damage).                                                                                                                                  |                                                                                     |

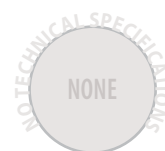

## Freezer: chest, human tissue

| Catalogue Number | Item Name                    | Available on Transversal Contract | Contract Number or Code |
|------------------|------------------------------|-----------------------------------|-------------------------|
| PHC-F-076        | Freezer: chest, human tissue | No                                |                         |

|                                    |                                                                                                 |
|------------------------------------|-------------------------------------------------------------------------------------------------|
| Description                        | Domestic-type small chest freezer.                                                              |
| Use                                | For storage of placentas, foreskins from MMC, and products of conception from TOP.              |
| Clinical or User Specifications    | Small chest type freezer.<br>Approximately 120l capacity.<br>Energy-efficient.<br>Lockable lid. |
| Accessories or Related Consumables | 2 keys.                                                                                         |
| Care                               | Standard cleaning and disinfection.                                                             |
| Supplier Warranty                  | 2 years.                                                                                        |

# Microwave oven: 25l, 900W manual

| Catalogue Number | Item Name      | Available on Transversal Contract | Contract Number or Code |
|------------------|----------------|-----------------------------------|-------------------------|
| PHC-F-021        | Microwave oven | No                                |                         |

|                                    |                                                           |                                                                                     |
|------------------------------------|-----------------------------------------------------------|-------------------------------------------------------------------------------------|
| Description                        | Microwave oven.                                           |  |
| Use                                | For rapid cooking and re-heating of meals.                |                                                                                     |
| Clinical or User Specifications    | Standard manual microwave oven.                           |                                                                                     |
| Accessories or Related Consumables | Oven plate and carousel.                                  |                                                                                     |
| Care                               | Clean after use according to manufacturer's instructions. |                                                                                     |
| Supplier Warranty                  | 2 years (excluding deliberate or accidental damage).      |                                                                                     |

# Mirror

| Catalogue Number | Item Name | Available on Transversal Contract | Contract Number or Code |
|------------------|-----------|-----------------------------------|-------------------------|
| PHC-F-014        | Mirror    | No                                |                         |

|                                    |                                                                                             |                                                                                     |
|------------------------------------|---------------------------------------------------------------------------------------------|-------------------------------------------------------------------------------------|
| Description                        | Mirror.                                                                                     |  |
| Use                                | For all areas where there is a hand washbasin.                                              |                                                                                     |
| Clinical or User Specifications    | Mirror in non-rusting frame.<br>Must be affixed to the wall, in proximity to the washbasin. |                                                                                     |
| Accessories or Related Consumables | To be supplied with wall mounting hardware (stainless steel screws).                        |                                                                                     |
| Care                               | Standard cleaning and disinfection.                                                         |                                                                                     |
| Supplier Warranty                  | 1 year on frame (excluding accidental or deliberate damage).                                |                                                                                     |

# Refrigerator: bar type

| Catalogue Number | Item Name              | Available on Transversal Contract | Contract Number or Code |
|------------------|------------------------|-----------------------------------|-------------------------|
| PHC-F-022        | Refrigerator: bar type | No                                |                         |

|                                    |                                                                                                                                                      |                                                                                     |
|------------------------------------|------------------------------------------------------------------------------------------------------------------------------------------------------|-------------------------------------------------------------------------------------|
| Description                        | Small bar type refrigerator.                                                                                                                         |  |
| Use                                | For storing specimens awaiting collection by the NHLS.                                                                                               |                                                                                     |
| Clinical or User Specifications    | Domestic –type small bar refrigerator.<br>To be kept in a protected location.<br>For specimen storage only.                                          |                                                                                     |
| Accessories or Related Consumables |                                                                                                                                                      |                                                                                     |
| Care                               | Clean external and internal surfaces with standard cleaning and disinfectant solutions.<br>Danger of cross-contamination if used for other purposes. |                                                                                     |
| Supplier Warranty                  | 3 years on all components (excluding deliberate or accidental damage).                                                                               |                                                                                     |

## Refrigerator: double door

| Catalogue Number | Item Name                 | Available on Transversal Contract | Contract Number or Code |
|------------------|---------------------------|-----------------------------------|-------------------------|
| PHC-F-047        | Refrigerator: double door | No                                |                         |

|                                    |                                                                                                                                                                                                                                                                                                    |                                                                                     |
|------------------------------------|----------------------------------------------------------------------------------------------------------------------------------------------------------------------------------------------------------------------------------------------------------------------------------------------------|-------------------------------------------------------------------------------------|
| Description                        | Upright, double door refrigerator, with freezer compartment for larger facilities.                                                                                                                                                                                                                 |  |
| Use                                | Used to store temperature sensitive medicines, and to prepare icepacks for cooler boxes.                                                                                                                                                                                                           |                                                                                     |
| Clinical or User Specifications    | Upright refrigerator, approximately 350l.<br>Self-closing, lockable doors.<br>Automatic defrost.<br>Forced air circulation.<br>Will keep temperature low for at least 4 hours, in the event of a power failure.<br>5 or 6 shelves per side.<br>Alarm for open door, system failure, power failure. |                                                                                     |
| Accessories or Related Consumables | None.                                                                                                                                                                                                                                                                                              |                                                                                     |
| Care                               | Clean interior and exterior with standard cleaning and disinfectant solutions.                                                                                                                                                                                                                     |                                                                                     |
| Supplier Warranty                  | 2 years on compressor, 5 years on other components (excluding deliberate or accidental damage).                                                                                                                                                                                                    |                                                                                     |

# Refrigerator: single door

| Catalogue Number | Item Name                 | Available on Transversal Contract | Contract Number or Code |
|------------------|---------------------------|-----------------------------------|-------------------------|
| PHC-F-043        | Refrigerator: single door | No                                |                         |

|                                    |                                                                                                                                                                                                                                                                                             |                                                                                     |
|------------------------------------|---------------------------------------------------------------------------------------------------------------------------------------------------------------------------------------------------------------------------------------------------------------------------------------------|-------------------------------------------------------------------------------------|
| Description                        | Upright, single-door refrigerator, with freezer compartment.                                                                                                                                                                                                                                |  |
| Use                                | Used to store temperature sensitive medicines, and to prepare icepacks for cooler boxes.                                                                                                                                                                                                    |                                                                                     |
| Clinical or User Specifications    | Upright refrigerator, approximately 260l.<br>Self-closing, lockable door.<br>Automatic defrost.<br>Forced air circulation.<br>Will keep temperature low for at least four hours, in the event of a power failure.<br>5 or 6 shelves.<br>Alarm for open door, system failure, power failure. |                                                                                     |
| Accessories or Related Consumables | None.                                                                                                                                                                                                                                                                                       |                                                                                     |
| Care                               | Clean interior and exterior with standard cleaning and disinfectant solutions.                                                                                                                                                                                                              |                                                                                     |
| Supplier Warranty                  | 2 years on compressor, 5 years on other components (excluding deliberate or accidental damage).                                                                                                                                                                                             |                                                                                     |

## Seating: 2-seater

| Catalogue Number | Item Name                       | Available on Transversal Contract | Contract Number or Code |
|------------------|---------------------------------|-----------------------------------|-------------------------|
| PHC-F-015        | Seating: waiting area, 2-seater | No                                |                         |

|                                    |                                                                                                                                                                                                                |                                                                                     |
|------------------------------------|----------------------------------------------------------------------------------------------------------------------------------------------------------------------------------------------------------------|-------------------------------------------------------------------------------------|
| Description                        | All metal bench style seating for waiting areas ("airport style").                                                                                                                                             |  |
| Use                                | 2-seater unit for waiting area.                                                                                                                                                                                |                                                                                     |
| Clinical or User Specifications    | Heavy-duty seating for waiting area. Can be used in combination with other units of the same or different sizes, to achieve an aesthetically-pleasing and durable environment for patients waiting to be seen. |                                                                                     |
| Accessories or Related Consumables | None.                                                                                                                                                                                                          |                                                                                     |
| Care                               | Standard cleaning and disinfection.                                                                                                                                                                            |                                                                                     |
| Supplier Warranty                  | 5 years on all components (excluding accidental or deliberate damage).                                                                                                                                         |                                                                                     |



## Seating: 3-seater

| Catalogue Number | Item Name                       | Available on Transversal Contract | Contract Number or Code |
|------------------|---------------------------------|-----------------------------------|-------------------------|
| PHC-F-016        | Seating: waiting area, 3-seater | No                                |                         |

|                                    |                                                                                                                                                                                                                |                                                                                     |
|------------------------------------|----------------------------------------------------------------------------------------------------------------------------------------------------------------------------------------------------------------|-------------------------------------------------------------------------------------|
| Description                        | All metal bench style seating for waiting areas ("airport style").                                                                                                                                             |  |
| Use                                | 3-seater unit for waiting area.                                                                                                                                                                                |                                                                                     |
| Clinical or User Specifications    | Heavy-duty seating for waiting area. Can be used in combination with other units of the same or different sizes, to achieve an aesthetically-pleasing and durable environment for patients waiting to be seen. |                                                                                     |
| Accessories or Related Consumables | None.                                                                                                                                                                                                          |                                                                                     |
| Care                               | Standard cleaning and disinfection.                                                                                                                                                                            |                                                                                     |
| Supplier Warranty                  | 5 years on all components (excluding accidental or deliberate damage).                                                                                                                                         |                                                                                     |

## Seating: 4-seater

| Catalogue Number | Item Name                       | Available on Transversal Contract | Contract Number or Code |
|------------------|---------------------------------|-----------------------------------|-------------------------|
| PHC-F-017        | Seating, waiting area, 4-seater | No                                |                         |

|                                    |                                                                                                                                                                                                                |                                                                                     |
|------------------------------------|----------------------------------------------------------------------------------------------------------------------------------------------------------------------------------------------------------------|-------------------------------------------------------------------------------------|
| Description                        | All metal bench style seating for waiting areas ("airport style").                                                                                                                                             |  |
| Use                                | 4-seater unit for waiting area.                                                                                                                                                                                |                                                                                     |
| Clinical or User Specifications    | Heavy-duty seating for waiting area. Can be used in combination with other units of the same or different sizes, to achieve an aesthetically-pleasing and durable environment for patients waiting to be seen. |                                                                                     |
| Accessories or Related Consumables | None.                                                                                                                                                                                                          |                                                                                     |
| Care                               | Standard cleaning and disinfection.                                                                                                                                                                            |                                                                                     |
| Supplier Warranty                  | 5 years on all components (excluding accidental or deliberate damage).                                                                                                                                         |                                                                                     |

## Steel cabinet: lockable, 6 shelves

| Catalogue Number | Item Name          | Available on Transversal Contract | Contract Number or Code |
|------------------|--------------------|-----------------------------------|-------------------------|
| PHC-F-018        | Stationery cabinet | No                                |                         |

|                                    |                                                                                                                                    |                                                                                     |
|------------------------------------|------------------------------------------------------------------------------------------------------------------------------------|-------------------------------------------------------------------------------------|
| Description                        | Stationery cabinet.                                                                                                                |  |
| Use                                | Used to store daily medication issuing quantities in consulting rooms. Can also be used for storage of garden tools and equipment. |                                                                                     |
| Clinical or User Specifications    | All-steel cabinet, with lockable double door.<br>Six Shelves.                                                                      |                                                                                     |
| Accessories or Related Consumables | Key and spare key.                                                                                                                 |                                                                                     |
| Care                               | Standard cleaning and disinfection.                                                                                                |                                                                                     |
| Supplier Warranty                  | 2 years on cabinet itself (excluding deliberate or accidental damage).<br>5 years on locks, lock bars, hinges and handles.         |                                                                                     |

## Storage rack: exercise ball, wall-mounted

| Catalogue Number | Item Name                                 | Available on Transversal Contract | Contract Number or Code |
|------------------|-------------------------------------------|-----------------------------------|-------------------------|
| PHC-F-067        | Storage rack: exercise ball, wall-mounted | No                                |                         |

|                                    |                                                                                                                                                                                  |
|------------------------------------|----------------------------------------------------------------------------------------------------------------------------------------------------------------------------------|
| Description                        | <p>Frame, able to accommodate all Bobath/physio balls. Wall-mounted.</p>                       |
| Use                                | Keeps the balls off the ground when not in use, and conserves free space.                                                                                                        |
| Clinical or User Specifications    | <p>Holds up to 4 balls, either in a frame or on rings.</p> <p>Epoxy-coated metal.</p> <p>Mounting height must allow easy access, while maximising free space below the rack.</p> |
| Accessories or Related Consumables | All wall-mounting hardware.                                                                                                                                                      |
| Care                               | Standard cleaning and disinfection.                                                                                                                                              |
| Supplier Warranty                  | 2 years.                                                                                                                                                                         |

# Table: folding

| Catalogue Number | Item Name      | Available on Transversal Contract | Contract Number or Code |
|------------------|----------------|-----------------------------------|-------------------------|
| PHC-F-068        | Table: folding | No                                |                         |

|                                    |                                                                                                                                                                                                                                                                                                                                     |                                                                                    |
|------------------------------------|-------------------------------------------------------------------------------------------------------------------------------------------------------------------------------------------------------------------------------------------------------------------------------------------------------------------------------------|------------------------------------------------------------------------------------|
| Description                        | Folding table, robust, portable.                                                                                                                                                                                                                                                                                                    |  |
| Use                                | Administrative work and clinical assessments, especially by outreach teams.                                                                                                                                                                                                                                                         |                                                                                    |
| Clinical or User Specifications    | Minimum size 120 cm X 75cm (larger preferred), height 70-75cm.<br>Impact- and scratch-resistant polyethylene top. Dark colour preferred.<br>Aluminium frame preferred. Legs fold under top and stay in folded position.<br>Top may be single piece or preferably two hinged pieces, for ease of transportation.<br>Carrying handle. |                                                                                    |
| Accessories or Related Consumables | None.                                                                                                                                                                                                                                                                                                                               |                                                                                    |
| Care                               | Standard cleaning and disinfection.                                                                                                                                                                                                                                                                                                 |                                                                                    |
| Supplier Warranty                  | 1 year.                                                                                                                                                                                                                                                                                                                             |                                                                                    |

## Table: trapezoidal

| Catalogue Number | Item Name          | Available on Transversal Contract | Contract Number or Code |
|------------------|--------------------|-----------------------------------|-------------------------|
| PHC-F-019        | Table: trapezoidal | No                                |                         |

|                                    |                                                                                                                                                                 |                                                                                     |
|------------------------------------|-----------------------------------------------------------------------------------------------------------------------------------------------------------------|-------------------------------------------------------------------------------------|
| Description                        | Trapezoidal table.                                                                                                                                              |  |
| Use                                | Multi-purpose table.                                                                                                                                            |                                                                                     |
| Clinical or User Specifications    | The design allows several tables to be configured in various ways (e.g. U-shape, circle) to meet specific needs (committee meetings, education sessions, etc.). |                                                                                     |
| Accessories or Related Consumables | None.                                                                                                                                                           |                                                                                     |
| Care                               | Standard cleaning and disinfection.                                                                                                                             |                                                                                     |
| Supplier Warranty                  | 5 years on all components (excluding accidental or deliberate damage).                                                                                          |                                                                                     |

# Tumble dryer

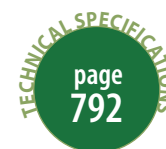

| Catalogue Number | Item Name    | Available on Transversal Contract | Contract Number or Code |
|------------------|--------------|-----------------------------------|-------------------------|
| PHC-F-045        | Tumble dryer | No                                |                         |

|                                    |                                                                                                                                                                                                                                                                                                                 |                                                                                     |
|------------------------------------|-----------------------------------------------------------------------------------------------------------------------------------------------------------------------------------------------------------------------------------------------------------------------------------------------------------------|-------------------------------------------------------------------------------------|
| Description                        | Tumble dryer, electric.                                                                                                                                                                                                                                                                                         |  |
| Use                                | For drying of laundry, where air drying is not practical.                                                                                                                                                                                                                                                       |                                                                                     |
| Clinical or User Specifications    | <p>Large capacity, electric tumble dryer.</p> <p>Front-loading.</p> <p>Vented type – must be mounted against outside wall, with hole through the wall for moisture exhaust hose.</p> <p>Can be mounted on the wall at eye-level to minimise floor space usage.</p>                                              |                                                                                     |
| Accessories or Related Consumables | Venting hose and wall-mounting bracket supplied with the unit.                                                                                                                                                                                                                                                  |                                                                                     |
| Care                               | <p>Must be installed by technical/maintenance personnel, as a hole must be drilled through the wall.</p> <p>Clean external surfaces with standard cleaning and disinfectant solutions.</p> <p>Clean the lint filter after use, or when the filter indicator appears during use (see supplier instructions).</p> |                                                                                     |
| Supplier Warranty                  | 3 years on all components (excluding deliberate or accidental damage).                                                                                                                                                                                                                                          |                                                                                     |

# Vacuum cleaner

| Catalogue Number | Item Name      | Available on Transversal Contract | Contract Number or Code |
|------------------|----------------|-----------------------------------|-------------------------|
| PHC-F-046        | Vacuum cleaner | No                                |                         |

|                                    |                                                                                                                                                                                                    |                                                                                     |
|------------------------------------|----------------------------------------------------------------------------------------------------------------------------------------------------------------------------------------------------|-------------------------------------------------------------------------------------|
| Description                        | Vacuum cleaner: Canister type, electric.                                                                                                                                                           |  |
| Use                                | For vacuuming premises.                                                                                                                                                                            |                                                                                     |
| Clinical or User Specifications    | Domestic vacuum cleaner – not intended for use throughout the facility, but for hard-to-reach areas, fabric surfaces.                                                                              |                                                                                     |
| Accessories or Related Consumables | Complete with flexible hose, extension tubes, brushes and attachments, set of filters, instruction manual. Replacement filter set: vacuum cleaner PHC-C-216.                                       |                                                                                     |
| Care                               | Clean external surfaces with standard cleaning and disinfectant solutions.<br>Clean the filters after use (see supplier instructions).<br>Replace the filters when vacuum efficiency deteriorates. |                                                                                     |
| Supplier Warranty                  | 2 years on motor and body.                                                                                                                                                                         |                                                                                     |



# Washing machine: front loader

| Catalogue Number | Item Name                     | Available on Transversal Contract | Contract Number or Code |
|------------------|-------------------------------|-----------------------------------|-------------------------|
| PHC-F-058        | Washing machine, front loader | No                                |                         |

|                                    |                                                                                                                                                                                                                                                                   |
|------------------------------------|-------------------------------------------------------------------------------------------------------------------------------------------------------------------------------------------------------------------------------------------------------------------|
| Description                        | Washing machine, front loader, electric.                                                                                                                                                                                                                          |
| Use                                | For washing of soiled linen on premises – for smaller facilities.                                                                                                                                                                                                 |
| Clinical or User Specifications    | Medium capacity electric front loader washing machine. 8 to 9kg dry load.<br>Automatic, with pre-set washing, rinsing and spinning cycles.                                                                                                                        |
| Accessories or Related Consumables |                                                                                                                                                                                                                                                                   |
| Care                               | Must be installed by technical/maintenance personnel – requires levelling on the floor, connection to cold water supply.<br>Clean external surfaces with standard cleaning and disinfectant solutions.<br>Clean the filter after use (see supplier instructions). |
| Supplier Warranty                  | 3 years on all components (excluding deliberate or accidental damage).                                                                                                                                                                                            |

## Washing machine: top loader

| Catalogue Number | Item Name                   | Available on Transversal Contract | Contract Number or Code |
|------------------|-----------------------------|-----------------------------------|-------------------------|
| PHC-F-048        | Washing machine: top loader | No                                |                         |

|                                    |                                                                                                                                                                                                                                                                   |                                                                                     |
|------------------------------------|-------------------------------------------------------------------------------------------------------------------------------------------------------------------------------------------------------------------------------------------------------------------|-------------------------------------------------------------------------------------|
| Description                        | Washing machine: top loader, electric.                                                                                                                                                                                                                            |  |
| Use                                | For washing soiled linen on premises.                                                                                                                                                                                                                             |                                                                                     |
| Clinical or User Specifications    | Large capacity electric top loader washing machine.<br>Automatic, with pre-set washing, rinsing and spinning cycles.                                                                                                                                              |                                                                                     |
| Accessories or Related Consumables |                                                                                                                                                                                                                                                                   |                                                                                     |
| Care                               | Must be installed by technical/maintenance personnel – requires levelling on the floor, connection to cold water supply.<br>Clean external surfaces with standard cleaning and disinfectant solutions.<br>Clean the filter after use (see supplier instructions). |                                                                                     |
| Supplier Warranty                  | 3 years on all components (excluding deliberate or accidental damage).                                                                                                                                                                                            |                                                                                     |

# **E**

# **APPENDICES**

## **appendix 1**

### technical specifications

# Introduction to the Technical Specifications

## WHAT ARE TECHNICAL SPECIFICATIONS?

Technical specifications go into detail about the functions, construction and performance of items of equipment or instrumentation, instruments, consumables and furniture, used in Primary Health Care facilities.

The purpose is to ensure that items procured are fit-for-purpose, and deliver value for money. A cheap alternative which is inaccurate, or fails prematurely, is a waste of money, and not fit-for-purpose.

Items such as blood pressure monitors which are designed for occasional domestic use, are not suitable for repetitive daily use in a busy clinic. The specifications therefore spell out the type of machine or instrument which will be suitable, i.e. the specifications set a minimum acceptable standard.

The specifications address several areas: the required functionality and construction, accepted standards (local or international) that must be met, and certain performance levels that must be met.

The specifications further note what accessories must be supplied with the item, what consumables may be needed during the use of the item, specific actions required of the suppliers, and notes to Supply Chain Management personnel regarding special aspects of procurement.

## A WORD ABOUT COMMON STANDARDS

**ISO9001/2 or ISO13485** certification. These standards relate to quality management systems – in the case of ISO13485, “for a comprehensive quality management system for the design and manufacture of medical devices”.

In this catalogue, ISO9001/2 and ISO13485, are treated as **default minimum standards**, and are not named separately. They are applicable to all medical equipment, instruments and consumables even if not explicitly stated, and particularly when no other standard is available. However, these standards are necessary, but not sufficient conditions, for ensuring the quality and durability of medical devices – they say nothing about the devices themselves.

**CE marking** is mandatory for devices for sale in the European Economic Area, and shows that a device conforms to all applicable directives for its category.

The directives promote *safety, health and environmental protection*. The CE marking is obtained largely by a self-certification process. Some categories of devices require assessment of conformity by an authorised third party (called a Notified Body e.g. TUV).

## STANDARDS APPROACH IN THIS CATALOGUE

An attempt has been made to find more specific standards, to improve quality and fitness-for-purpose.

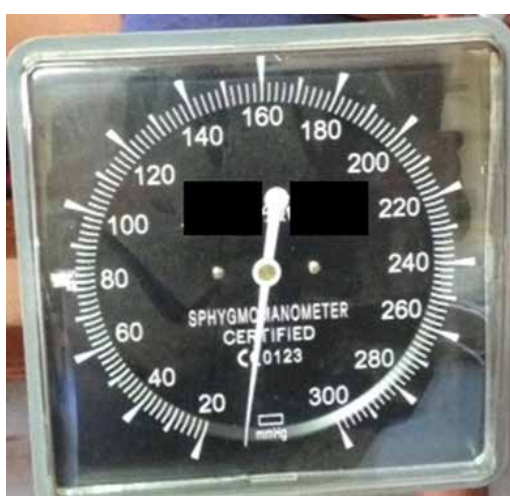

In this example of one of many poor-quality, short-lived sphygmomanometers taken from one of our clinics, the CE0123 can be seen prominently. 0123 is the code for the Notified Body, in this case TUV. In this case, conformity with the directives, assumed to be authentic, is not enough – it can be seen that the needle

has not returned to the proper resting position (the machine had not functioned for long). That machine could be inaccurate by as much as 10mmHg. – more than enough to misdiagnose someone as hypertensive, and begin chronic treatment unnecessarily. We would prefer certification against EN1060-1:1995, EN1060-2:1996+A1:2009. In some cases, even such standards are insufficient, and we have recommended that clinical studies validating items of equipment (such as sphygmomanometers) should be demanded. This is becoming best-practice in procurement in other jurisdictions; since it is unlikely that we are paying less for these products than other countries, there is no reason to accept lower quality.

Precedence has been given to **South African National Standards**, where they exist.

## **WHERE SPECIFIC STANDARDS ARE NOTED IN THIS CATALOGUE, COMPLIANCE IS MANDATORY**

There has been widely-reported fraud around the use of standards and markings. Requesting certificates with bids is necessary, but verifying their authenticity is also necessary. Should an item not live up to the applicable standards, investigation and action must follow. It is therefore the duty of healthcare workers to report poor performance of catalogue items.

Regrettably, for many items there are as yet no standards. However, standards are constantly evolving, and new standards are emerging. The standards in this catalogue will be updated from edition to edition.

# technical specifications

|                             |            |                                 |            |
|-----------------------------|------------|---------------------------------|------------|
| <b>CLINICAL EQUIPMENT</b>   | <b>542</b> | <b>FURNITURE AND APPLIANCES</b> | <b>724</b> |
| <i>Diagnostic</i>           | <i>542</i> | <i>Clinical</i>                 | <i>724</i> |
| <i>Essential</i>            | <i>570</i> | <i>General</i>                  | <i>763</i> |
| <i>Specialised</i>          | <i>577</i> |                                 |            |
| Resuscitation               | 577        |                                 |            |
| Point of Care Testing       | 599        |                                 |            |
| Sterilisation               | 602        |                                 |            |
| Oral Health                 | 608        |                                 |            |
| <b>GENERAL EQUIPMENT</b>    | <b>631</b> |                                 |            |
| <i>Building maintenance</i> | <i>631</i> |                                 |            |
| <i>Cleaning</i>             | <i>667</i> |                                 |            |
| <i>Cold chain</i>           | <i>686</i> |                                 |            |
| <i>Fire safety</i>          | <i>690</i> |                                 |            |
| <i>Garden</i>               | <i>693</i> |                                 |            |
| <i>Kitchen</i>              | <i>712</i> |                                 |            |
| <i>Miscellaneous</i>        | <i>716</i> |                                 |            |

# Clinical equipment

## Diagnostic

| Catalogue Number | Item Name                                   | Available on Transversal Contract | Contract Number or Code |
|------------------|---------------------------------------------|-----------------------------------|-------------------------|
| PHC-E-115        | <b><i>Sphygmomanometer:<br/>aneroid</i></b> | No                                |                         |

|                            |                                                                                                                                                                                                                                                                                                                                                                                                                                                                                                                                                                          |
|----------------------------|--------------------------------------------------------------------------------------------------------------------------------------------------------------------------------------------------------------------------------------------------------------------------------------------------------------------------------------------------------------------------------------------------------------------------------------------------------------------------------------------------------------------------------------------------------------------------|
| Functional Specifications  | Mounted.<br>Aneroid sphygmomanometer.                                                                                                                                                                                                                                                                                                                                                                                                                                                                                                                                    |
| Applicable Standards       | Instrument must conform to EN 1060-1: 1995, Non-invasive sphygmomanometers <b>Part 1:</b> General Requirements; European Standard EN 1060-2: 1996, Non-invasive sphygmomanometers. <b>Part 2:</b> General Requirements; or equivalent (e.g. BS EN ISO 81060-1:2012) , BS EN 1060-2:1995+A1:2009, Non-invasive sphygmomanometers: Supplementary requirements for mechanical sphygmomanometers.<br>Certificate to be supplied. Independent published studies preferred.<br>Casters compliant with SABS 621.                                                                |
| Performance Specifications | Dial to be large, clear, high-contrast.<br>Marked in 1mm Hg divisions.<br>Precision: Standard deviation <1mm Hg in 30 consecutive measurements at 120/80 mmHg.<br>Must be cleanable and disinfectable with standard solutions.                                                                                                                                                                                                                                                                                                                                           |
| Accessories                | Must be supplied with re-usable adult, large adult and child cuffs. Sizes to be clearly marked on cuffs.<br>Cuffs may be one-piece or two-piece.<br>Must have options to attach to the wall unit of an ophthalmoscope/otoscope wall-mounted cradle, or directly onto a wall, or onto an instrument rail or pole. Mounting hardware must be provided as options, with pricing. In either case, the mounting system must include a cradle for the cuff, when not in use.<br>Mobile floor stand can be offered as an option (5-star base, casters compliant with SABS 621). |



|                           |                                                                                                                                                                                                                                                                                                                                                                                                                                                                                                                                                                                                    |
|---------------------------|----------------------------------------------------------------------------------------------------------------------------------------------------------------------------------------------------------------------------------------------------------------------------------------------------------------------------------------------------------------------------------------------------------------------------------------------------------------------------------------------------------------------------------------------------------------------------------------------------|
| Warranties                | <p>At least 2 year guarantee on cuffs <b>and</b> covers (including bladders, tubes, outer covers, inflation bulbs, air inlet valves, release valves, filters and cuff fastening mechanism – velcro or other). Cuffs and covers must be easily cleanable.</p> <p>At least 10 year guarantee on instrument. At least 10 year calibration guarantee by supplier/ manufacturer. Calibration frequency, procedure and requirements to be clearly stated.</p> <p>Where calibration can be performed by user technicians, any necessary proprietary reference instruments to be offered with pricing.</p> |
| Instructions to Suppliers | <p>Supplier must specify available after-sales support, with relevant pricing.</p>                                                                                                                                                                                                                                                                                                                                                                                                                                                                                                                 |
| Note to Procurement       | <p>Spare cuffs in four sizes and covers, bulbs, tubes, inlet and release valves, must be in series with this instrument.</p> <p>The fact that an instrument is marked CE 0123, is no guarantee of the accuracy or durability of the instrument, or suitability for the South African operating environment.</p>                                                                                                                                                                                                                                                                                    |

| Catalogue Number | Item Name                                                                            | Available on Transversal Contract | Contract Number or Code |
|------------------|--------------------------------------------------------------------------------------|-----------------------------------|-------------------------|
| PHC-E-116        | <b><i>Blood pressure monitor:<br/>automated, non-invasive,<br/>desktop model</i></b> | No                                |                         |

## Functional Specifications

The unit will automatically inflate and deflate the cuff once a switch is pressed.

Automatic timed repetitive readings are not required, as this machine will not be used for ongoing monitoring. However, a unit which automatically performs several measurements and displays the average, would be desirable.

**Modes:** Manual/stat (optionally average of multiple readings). Continuous monitoring not required.

Given the operational environment, the smallest number of controls is preferred.

Ideally, unit will automatically go to power-saving mode between measurements.

Although not mandatory, external communication port would be an advantage.

Could be optional (USB or RJ).

Must be suitable for adults, children and neonates.

The unit must use the oscillometric method of measurement.

Unit should have optional module to measure temperature, or alternative model incorporating temperature measurement should be proposed.

Temperature measured and displayed in degrees Centigrade, state range available.

Values must be displayed numerically via LED or backlit LCD (colour or monochrome). Must be clearly visible under all lighting conditions.

Display should also indicate battery- and charging status.

Auto zero when unit is switched on reusable cuffs must be supplied: Large Adult, Adult, paediatric, neonatal.

Cuffs and cuff covers must be washable, disinfectable.

The air hose must be at least 1,5 metres long.

The unit must charge from 220 V, 50 Hz mains supply.

Rechargeable battery and charger incorporated in the unit.

The battery must be charged while the unit is operating from the mains supply.

Battery must be replaceable.

Battery charger to be incorporated in the unit.

The battery must automatically take over in the event of a mains power failure.

The length of the mains cable must be a minimum of three metres.

The battery must operate for at least eight hours with measurements every five minutes.

Data storage: last reading, or last average.

The unit must be impervious to liquids.

The case of the unit must be robust and impact resistant. Must have mounting point for wall and pole.

|                            |                                                                                                                                                                                                                                                                                                                                                                                                                                                                                                                                                                                                                                                                                                                                                                                                                                                                                                                                                                                                |
|----------------------------|------------------------------------------------------------------------------------------------------------------------------------------------------------------------------------------------------------------------------------------------------------------------------------------------------------------------------------------------------------------------------------------------------------------------------------------------------------------------------------------------------------------------------------------------------------------------------------------------------------------------------------------------------------------------------------------------------------------------------------------------------------------------------------------------------------------------------------------------------------------------------------------------------------------------------------------------------------------------------------------------|
| Applicable Standards       | <p>Measurement accuracy must have been clinically validated (AASI/AAMI SP10-2002, BHS protocol, or ESH protocol). PROOF TO BE SUBMITTED, PREFERABLY PEER-REVIEWED PUBLISHED REPORT.</p> <p>Unpublished independent clinical validation study may be accepted in absence of peer-reviewed published report. Minimum is in-house clinical validation study and report.</p> <p>Evidence of measurement repeatability required (SD &lt;1mm Hg from 30 consecutive measurements of 120/80mm Hg).</p> <p>Must comply with latest version of EN 1060-4, EN 1060-3 with Amendment A1:2005.</p> <p>Supplier must supply certificate issued by Directorate of Radiation Control of the Department of Health, in terms of the Hazardous Substances Act (Act 15 of 1973).</p>                                                                                                                                                                                                                              |
| Performance Specifications | <p>State whether measurements are performed on inflation or deflation part of cycle.</p> <p>State BP measurement algorithm.</p> <p>Pressure measurements:</p> <p><b>Adult:</b> Systolic: 30-270mm Hg, Diastolic: 20-240mm Hg, MAP: 20-250mm Hg</p> <p><b>Paediatric:</b> Systolic: 30-160mm Hg, Diastolic: 20-120, MAP: 20-120mm Hg</p> <p><b>Neonate:</b> Systolic: 30-130mm Hg, Diastolic: 20-100mm Hg, MAP: 20 – 120mm Hg</p> <p><b>Heart rate:</b> 30-240 /min. Indication of pulse irregularity desirable</p> <p><b>Low battery:</b> Alarm at least 10 minutes before battery power is exhausted</p> <p><b>Over pressure protection:</b> Automatic deflation at 300mm Hg adult, 150mm Hg neonate</p> <p><b>Average measurement time:</b> approximately 30s.</p> <p>If measurement exceeds two minutes the cuff must deflate, an alarm must sound and likely faults indicated.</p> <p>Supplier to state Mean Time Before Failure for Unit and any parts which may have different MTBF.</p> |
| Accessories                | <p><b>Reusable cuffs must be supplied:</b> Large adult, adult, paediatric, neonatal.</p> <p>Cuffs and cuff covers must be washable, disinfectable.</p>                                                                                                                                                                                                                                                                                                                                                                                                                                                                                                                                                                                                                                                                                                                                                                                                                                         |
| Warranties                 | <p>3 years on all parts (including cuffs and cuff covers) except battery.</p> <p>Specify expected battery life under 8 hr continual operations, daily cycling.</p> <p>Guarantee to include calibration.</p>                                                                                                                                                                                                                                                                                                                                                                                                                                                                                                                                                                                                                                                                                                                                                                                    |

|                           |                                                                                                                                                                                                                                                                                                                                                                                                                                                                                                                                                                                                                                                                                                                                                                                                                                                                                                                                                                                                                                                                                                                                           |
|---------------------------|-------------------------------------------------------------------------------------------------------------------------------------------------------------------------------------------------------------------------------------------------------------------------------------------------------------------------------------------------------------------------------------------------------------------------------------------------------------------------------------------------------------------------------------------------------------------------------------------------------------------------------------------------------------------------------------------------------------------------------------------------------------------------------------------------------------------------------------------------------------------------------------------------------------------------------------------------------------------------------------------------------------------------------------------------------------------------------------------------------------------------------------------|
| Instructions to Suppliers | <p>Supplier to stipulate any costs associated with service over the Guarantee period, and whether a service plan is available (specify price).</p> <p>Supplier to stipulate recommended recalibration intervals.</p> <p>Cuffs and covers must be cleanable and disinfectable. Indicate whether sterilisable, preferred method, and number of cycles.</p> <p>Supplier must specify available after-sales support, with relevant pricing.</p> <p>Quote prices incl VAT for:</p> <ul style="list-style-type: none"> <li>Large adult cuff</li> <li>Adult cuff</li> <li>Paediatric cuff</li> <li>Neonatal cuff</li> <li>Air hose</li> <li>Battery</li> <li>Replaceable main board (if user serviceable)</li> <li>Temperature sensor (if disposable, quote price per 100)</li> <li>Optional wall-mounting bracket</li> <li>Optional pole-mounting fixture</li> <li>Optional bracket to fix unit to a table top</li> <li>Optional mobile stand on 5-star base with non-marking castors SABS 601)</li> <li>Optional cradle for cuff when not in use (wall/pole/stand)</li> </ul> <p>Supplier to deliver and commission units and train users.</p> |
| Note to Procurement       | <p>The following items should be in series with this instrument:</p> <ul style="list-style-type: none"> <li>Large adult cuff</li> <li>Adult cuff</li> <li>Paediatric cuff</li> <li>Neonatal cuff</li> <li>Air hose</li> <li>Battery</li> <li>Replaceable main board (if user serviceable).</li> <li>Temperature sensor (if disposable, quote price per 100)</li> <li>Optional wall-mounting bracket</li> <li>Optional pole-mounting fixture.</li> </ul> <p><b>Note:</b> the above specifications are more stringent than RT 2 Item code 42272501-00002, and should be referred to for future procurement. The item in RT 2 has continuous monitoring capabilities, which are not required. The lack of quality measures means that there are a wide range of units on offer. This defeats standardisation.</p>                                                                                                                                                                                                                                                                                                                            |

| Catalogue Number | Item Name              | Available on Transversal Contract | Contract Number or Code |
|------------------|------------------------|-----------------------------------|-------------------------|
| PHC-E-265        | <b>Cardiotocograph</b> | RT2-2016                          | 42181701-00005          |

## Functional Specifications

Required for external monitoring of foetal heart rate (FHR), and external monitoring of uterine activity of pregnant patients.

Twins monitoring is required.

Must perform automatic self-check when switched on.

There must a visible Foetal Heart Beat indicator which will flash with each detected heart beat.

The unit must provide an audio signal, with variable volume, for every heart beat detected.

The foetal heart rate must be measured by means of wide beam pulsed Doppler ultrasound, with auto correlation processing.

Must be able to detect and display multiple FHR while discriminating between different foetuses.

The transducer must be manufactured of high-impact plastic that is robust and watertight.

The belts and buckles supplied for positioning of the transducer must allow easy angling for optimum positioning.

Adjustable baseline position.

A test button must be provided that produces a series of pulses for calibration which must be recorded and displayed.

Display: > 16 cm (corner to corner).

Displays must be clearly visible under all lighting conditions.

Must allow Maternal Heart Rate (MHR) and Fetal Heart Rate(FHR) coincidence detection.

The following parameters must be displayed:

Foetal heart rate approximately 50 to 200 beats per minute

Uterine activity: approximately 0 to 100 relative units.

Foetal heart rate must update once per second when FHR is greater than 60 and once each beat when FHR is less than 60.

The monitor must have the following controls:

Volume Up/Down

TOCO/IUP Zero

Printer On/Off

Printer fast forward.

Must have audible and visual alarms for low/high FHR.

Electronic storage data capacity.

RECORDER

Integrated dual channel thermal recorder.

Dual heart rate recording for twins must be available.

All dot print test.

The strip chart paper must be easy to load.

|                            |                                                                                                                                                                                                                                                                                                                                                                                                                                                                                                                                                                                                                                                                                                                                                                                                                                                                                                                                                                                                                                                                                                                                                                                                                                                                 |
|----------------------------|-----------------------------------------------------------------------------------------------------------------------------------------------------------------------------------------------------------------------------------------------------------------------------------------------------------------------------------------------------------------------------------------------------------------------------------------------------------------------------------------------------------------------------------------------------------------------------------------------------------------------------------------------------------------------------------------------------------------------------------------------------------------------------------------------------------------------------------------------------------------------------------------------------------------------------------------------------------------------------------------------------------------------------------------------------------------------------------------------------------------------------------------------------------------------------------------------------------------------------------------------------------------|
|                            | <p><b>TRANSDUCERS</b></p> <p>Ultrasound and toco transducers must be supplied.</p> <p>All transducers must be of very robust design. Suppliers must guarantee shock resistance on the transducers e.g. will withstand a drop from one metre high onto a hard surface.</p> <p>Suppliers must state whether the ultrasound transducer is repairable and which parts are replaceable or whether it is a sealed unit that must be replaced when faulty.</p> <p>The ultrasound transducer cable must be a minimum of 2 m long.</p> <p>Connecting plug must be keyed and colour coded to avoid it being plugged or forced into the wrong receptacle on the unit.</p> <p><b>GENERAL</b></p> <p>The unit must operate off 220V, 50Hz power supply.</p> <p>All metal parts must be earthed.</p> <p>Mains cable at least three metres long with SABS approved 15A three prong plug.</p> <p>Must be fitted with rechargeable batteries.</p> <p>The unit must be fitted with an internal battery charger.</p> <p>Indicator for battery status.</p> <p>Must store trends for at least 8 hours.</p> <p>A cart/trolley must be supplied.</p> <p>The cart must have four castor wheels, two of them with brakes.</p> <p>The cart must have a basket/holder for accessories.</p> |
| Applicable Standards       | ISO 80601-1-11:2015.                                                                                                                                                                                                                                                                                                                                                                                                                                                                                                                                                                                                                                                                                                                                                                                                                                                                                                                                                                                                                                                                                                                                                                                                                                            |
| Performance Specifications | <p>The oscillator frequency &lt; 1,2 MHz.</p> <p>Ultrasound intensity must be less than 10 mW/cm<sup>2</sup>.</p> <p>Foetal heart rate:</p> <ul style="list-style-type: none"> <li>Range: approximately 50 to 210 beats per minute</li> <li>Vertical chart: at least 7 cm</li> <li>Vertical scale sensitivity: approximately 20 bpm per cm</li> <li>Resolution: 1 bpm.</li> </ul> <p>Uterine activity:</p> <ul style="list-style-type: none"> <li>Range: 0 – 100 units</li> <li>Vertical chart: at least 4 cm</li> <li>Vertical scale sensitivity: approximately 25 relative units per cm</li> <li>Resolution: 1 relative unit.</li> </ul> <p>Paper chart speed must be selectable for 1, 2 and 3 cm per minute.</p> <p>The time and date must be printed by the recorder at least every 10 minutes.</p> <p>Recording time must be at least 24 hours at 1 cm per minute.</p> <p>The unit must have a facility for remote event marking.</p>                                                                                                                                                                                                                                                                                                                     |

|                           |                                                                                                                                                                                                                                                                                                                                                       |
|---------------------------|-------------------------------------------------------------------------------------------------------------------------------------------------------------------------------------------------------------------------------------------------------------------------------------------------------------------------------------------------------|
| Accessories               | <p>Ultrasound and toco transducers and connecting cables.</p> <p>Mains cable.</p> <p>Transducer holders must be provided.</p> <p>Cart/trolley.</p>                                                                                                                                                                                                    |
| Warranties                | <p>2 years.</p>                                                                                                                                                                                                                                                                                                                                       |
| Instructions to Suppliers | <p>The unit must be handed over in full operating orderA starter-pack of consumables must be supplied with the unit.</p> <p>List ALL available consumables with prices incl VAT.</p> <p>List ALL available accessories with prices incl VAT.</p> <p>On-site training to be given.</p> <p>Specify testing procedures and frequency of maintenance.</p> |
| Note to Procurement       | <p>Purchase with a 5-year maintenance contract.</p>                                                                                                                                                                                                                                                                                                   |

| Catalogue Number | Item Name                              | Available on Transversal Contract | Contract Number or Code |
|------------------|----------------------------------------|-----------------------------------|-------------------------|
| PHC-E-117        | <b><i>Diagnostic set: portable</i></b> | RT 252                            | RT 252-01-051 ME        |

|                            |                                                                                                                                                                                                                                                                                                                                                                                                                                                                                                                                                                                                                                                                                                                                                                                                                                                                                                                                                                                                                                                                                                                                                                                                                                                                                                                                                                                                    |
|----------------------------|----------------------------------------------------------------------------------------------------------------------------------------------------------------------------------------------------------------------------------------------------------------------------------------------------------------------------------------------------------------------------------------------------------------------------------------------------------------------------------------------------------------------------------------------------------------------------------------------------------------------------------------------------------------------------------------------------------------------------------------------------------------------------------------------------------------------------------------------------------------------------------------------------------------------------------------------------------------------------------------------------------------------------------------------------------------------------------------------------------------------------------------------------------------------------------------------------------------------------------------------------------------------------------------------------------------------------------------------------------------------------------------------------|
| Functional Specifications  | <p>Otoscope and ophthalmoscope, with battery handle and throat examination head, in a carry case.</p> <p>Handle based Rheostat for light intensity adjustment.</p> <p>Set of 4 re-usable plastic specula for the otoscope.</p> <p>The Otoscope to be supplied with four re-usable polypropylene specula sizes 2.5, 3, 4 and 5mm. The Otoscope head is to be supplied with a positive-lock connection to the handle.</p> <p>The Otoscope is to utilise fibre optic cool-light supply with no reflections. The Otoscope is to have a Wide-angled viewing lens for instrumentation whilst under magnification. The unit is to be completely sealed for Pneumatic otoscopy (i.e. not open operating model). Light LED (optimized for best tissue viewing).</p> <p>Standard Ophthalmoscope head to fit onto the same handle. The Ophthalmoscope head is to cover 25 to 40 Diopters. Illuminated lens dial with clear indication of settings. Red-free filter. Very small, small, large, target and slit apertures. Sealed optics for dust protection. The Ophthalmoscope head is to be supplied with a positive-lock connection to the handle. Light supply LED (optimized for best tissue viewing).</p> <p>Illuminated tongue depressor holder, to fit same handle. To accept standard disposable wooden tongue depressors.</p> <p><b>Batteries:</b> 2 non-corrosive 1,5 volt cells, AA or C size.</p> |
| Applicable Standards       | ISO 10942:2006 Hand-held Direct Ophthalmoscopes. Proof to be supplied.                                                                                                                                                                                                                                                                                                                                                                                                                                                                                                                                                                                                                                                                                                                                                                                                                                                                                                                                                                                                                                                                                                                                                                                                                                                                                                                             |
| Performance Specifications | Must be cleanable and disinfectable with standard solutions.                                                                                                                                                                                                                                                                                                                                                                                                                                                                                                                                                                                                                                                                                                                                                                                                                                                                                                                                                                                                                                                                                                                                                                                                                                                                                                                                       |
| Accessories                | 1 Spare Globe for each head, 2 sets of batteries, 4 specula, carry case.                                                                                                                                                                                                                                                                                                                                                                                                                                                                                                                                                                                                                                                                                                                                                                                                                                                                                                                                                                                                                                                                                                                                                                                                                                                                                                                           |
| Warranties                 | Minimum 7 year warranty on otoscope, ophthalmoscope, throat illuminator heads and handle. Longer preferred.                                                                                                                                                                                                                                                                                                                                                                                                                                                                                                                                                                                                                                                                                                                                                                                                                                                                                                                                                                                                                                                                                                                                                                                                                                                                                        |
| Instructions to Suppliers  | Supplier must specify available after-sales support, with relevant pricing.                                                                                                                                                                                                                                                                                                                                                                                                                                                                                                                                                                                                                                                                                                                                                                                                                                                                                                                                                                                                                                                                                                                                                                                                                                                                                                                        |
| Note to Procurement        | <p>These specifications may differ from those used in RT 252 -01-051 ME.</p> <p>Spare globes for each head to be in series with this item.</p>                                                                                                                                                                                                                                                                                                                                                                                                                                                                                                                                                                                                                                                                                                                                                                                                                                                                                                                                                                                                                                                                                                                                                                                                                                                     |



| Catalogue Number | Item Name                                  | Available on Transversal Contract | Contract Number or Code |
|------------------|--------------------------------------------|-----------------------------------|-------------------------|
| PHC-E-118        | <b><i>Diagnostic set: wall-mounted</i></b> | RT 252                            | RT 252-01-050 ME        |

|                            |                                                                                                                                                                                                                                                                                                                                                                                                                                                                                                                                                                                                                                                                                                                                                                                                                                                                                                                                                                                                                                                                                                                                                                                                                                                                                                                                                                                                                                                                                                                                                                                                                                                                                                                                                                                                                                                                                                                                                                                                                                                                                                                                                                                                                                                                                                                                                                                                                                                                  |
|----------------------------|------------------------------------------------------------------------------------------------------------------------------------------------------------------------------------------------------------------------------------------------------------------------------------------------------------------------------------------------------------------------------------------------------------------------------------------------------------------------------------------------------------------------------------------------------------------------------------------------------------------------------------------------------------------------------------------------------------------------------------------------------------------------------------------------------------------------------------------------------------------------------------------------------------------------------------------------------------------------------------------------------------------------------------------------------------------------------------------------------------------------------------------------------------------------------------------------------------------------------------------------------------------------------------------------------------------------------------------------------------------------------------------------------------------------------------------------------------------------------------------------------------------------------------------------------------------------------------------------------------------------------------------------------------------------------------------------------------------------------------------------------------------------------------------------------------------------------------------------------------------------------------------------------------------------------------------------------------------------------------------------------------------------------------------------------------------------------------------------------------------------------------------------------------------------------------------------------------------------------------------------------------------------------------------------------------------------------------------------------------------------------------------------------------------------------------------------------------------|
| Functional Specifications  | <p>A wall-mounted unit, combining a wall-mounted cradle, an Otoscope, an ophthalmoscope, and the necessary transformer.</p> <p>The wall unit must be of a durable, easy-to-clean material, such as aluminium or high-impact ABS.</p> <p>The unit must have cradles for the other two instruments, and optionally have a mounting point for the aneroid sphygmomanometer.</p> <p>The cradles should have sensors or switches to automatically turn the instruments on when lifted out of their cradles, and switch off when they are placed back in the cradles. Connecting cables between wall unit and instruments can be coiled or straight, but must have positive-lock connections to the instrument heads.</p> <p>Cables must be covered in latex-free rubber or PVC, no woven covering.</p> <p>Handle based Rheostats for light adjustments for both instrument.</p> <p>Cassette for specula not required.</p> <p>The transformer may be integrated into the wall mounting plate, or be external, for direct insertion into a wall socket. In either case, mains connecting cable minimum length 2 meters must be supplied, with a moulded plug to fit standard SABS-approved 15-amp three pin outlets.</p> <p>The transformer must accept 220 volts AC at 50 Hz. Guarantee on all cables and power supplies must be 5 years or better.</p> <p>Otoscope head to fit onto the handle of the wall mounted transformer. The Otoscope to be supplied with four polypropylene specula sizes 2.5, 3, 4 and 5mm (6 of each size, re-usable quality). The Otoscope head is to be supplied with a positive-lock connection to the handle.</p> <p>The Otoscope is to utilize fibre optic cool-light supply with no reflections. The Otoscope is to have a Wide-angled viewing lens for instrumentation whilst under magnification. The unit is to be completely sealed for Pneumatic otoscopy (i.e. not open operating model). Light LED (optimized for best tissue viewing).</p> <p>Standard Ophthalmoscope head to fit onto the second handle of the wall mounted transformer.</p> <p>The Ophthalmoscope head is to cover -25 to 40 Diopters. Illuminated lens dial with clear indication of settings. Red-free filter. Very small, small, large, target and slit apertures. Sealed optics for dust protection. The Ophthalmoscope head is to be supplied with a positive-lock connection to the handle. Light supply LED (optimized for best tissue viewing).</p> |
| Applicable Standards       | <p>ISO 10942:2006 Hand-held Direct Ophthalmoscopes. Proof to be supplied.</p> <p>Supplier must supply certificate issued by Directorate of Radiation Control of the Department of Health, in terms of the Hazardous Substances Act (Act 15 of 1973).</p>                                                                                                                                                                                                                                                                                                                                                                                                                                                                                                                                                                                                                                                                                                                                                                                                                                                                                                                                                                                                                                                                                                                                                                                                                                                                                                                                                                                                                                                                                                                                                                                                                                                                                                                                                                                                                                                                                                                                                                                                                                                                                                                                                                                                         |
| Performance Specifications | <p>Must be cleanable and disinfectable with standard solutions.</p>                                                                                                                                                                                                                                                                                                                                                                                                                                                                                                                                                                                                                                                                                                                                                                                                                                                                                                                                                                                                                                                                                                                                                                                                                                                                                                                                                                                                                                                                                                                                                                                                                                                                                                                                                                                                                                                                                                                                                                                                                                                                                                                                                                                                                                                                                                                                                                                              |

|                           |                                                                                                                                                  |
|---------------------------|--------------------------------------------------------------------------------------------------------------------------------------------------|
| Accessories               | 1 spare globe for each head, 4 re-usable specula. All wall-mounting hardware.                                                                    |
| Warranties                | Minimum 7 year warranty on otoscope and ophthalmoscope heads, longer preferred. 2 years on cables, 1 year on transformer.                        |
| Instructions to Suppliers | Supplier to deliver and install, including electrical connection.<br>Supplier must specify available after-sales support, with relevant pricing. |
| Note to Procurement       | These specifications may differ from those used in RT 252 -01-050 ME.<br>Spare globes to be in series with this item.                            |

| Catalogue Number | Item Name                                              | Available on Transversal Contract | Contract Number or Code |
|------------------|--------------------------------------------------------|-----------------------------------|-------------------------|
| PHC-E-119        | <b><i>Diagnostic combination set: wall-mounted</i></b> | No                                |                         |

|                            |                                                                                                                                                                                                                                                                                                                                                                                                                                                                                                                                                                                                                                                                                                                                            |
|----------------------------|--------------------------------------------------------------------------------------------------------------------------------------------------------------------------------------------------------------------------------------------------------------------------------------------------------------------------------------------------------------------------------------------------------------------------------------------------------------------------------------------------------------------------------------------------------------------------------------------------------------------------------------------------------------------------------------------------------------------------------------------|
| Functional Specifications  | <p>This unit combines the instruments of PHC-E-119 with an aneroid sphygmomanometer, PHC-E-115. It therefore has the functional specifications of both these units.</p> <p>The unit may additionally have a cassette holder for disposable otoscope tips, but re-usable tips are preferred.</p>                                                                                                                                                                                                                                                                                                                                                                                                                                            |
| Applicable Standards       | <p>ISO 10942:2006 Hand-held direct ophthalmoscopes. Proof to be supplied.</p> <p>Supplier must supply certificate issued by Directorate of Radiation Control of the Department of Health, in terms of the Hazardous Substances Act (Act 15 of 1973).</p>                                                                                                                                                                                                                                                                                                                                                                                                                                                                                   |
| Performance Specifications | <p>As per PHC-E-115 together with PHC-E-118.</p> <p>Must be cleanable and disinfected with standard cleaning solutions.</p>                                                                                                                                                                                                                                                                                                                                                                                                                                                                                                                                                                                                                |
| Accessories                | <p>1 spare globe for each head, 4 re-usable specula. All wall-mounting hardware.</p> <p>Must be supplied with re-usable Adult, Large Adult and Child cuffs. Sizes to be clearly marked on cuffs. Cuffs may be one-piece or two-piece.</p> <p>Cradle for cuff when not in use.</p>                                                                                                                                                                                                                                                                                                                                                                                                                                                          |
| Warranties                 | <p>Minimum 7year warranty on otoscope and ophthalmoscope heads, longer preferred. 2 years on cables, 1 year on transformer.</p> <p>At least 2 year guarantee on cuffs <b>and</b> covers (including bladders, tubes, outer covers, inflation bulbs, air inlet valves, release valves, filters and cuff fastening mechanism – Velcro or other). Cuffs and covers must be easily cleanable.</p> <p>At least 10 year guarantee on aneroid instrument. At least 10 year calibration guarantee by supplier/ manufacturer. Calibration frequency, procedure and requirements to be clearly stated.</p> <p>Where calibration can be performed by user technicians, any necessary proprietary reference instruments to be offered with pricing.</p> |
| Instructions to Suppliers  | <p>Supplier to deliver and install, including electrical connection.</p> <p>Supplier must specify available after-sales support, with relevant pricing.</p>                                                                                                                                                                                                                                                                                                                                                                                                                                                                                                                                                                                |
| Note to Procurement        | <p>These specifications may differ from those used in RT 252 -01-050 ME.</p> <p>The Ophthalmoscope head and Otoscope head should be identical to those in PHC-E-118.</p> <p>Ideally, the Sphygmomanometer should be identical to PHC-E-115, with mounting hardware to attach to the wall unit.</p> <p>Spare globes to be in series with this item.</p> <p>Spare cuffs in four sizes and covers, bulbs, tubes, inlet and release valves, must be in series with this instrument.</p> <p>The fact that an instrument is marked CE 0123, is no guarantee of the accuracy or durability of the instrument, or suitability for the South African operating environment.</p>                                                                     |

| Catalogue Number | Item Name                                          | Available on Transversal Contract | Contract Number or Code |
|------------------|----------------------------------------------------|-----------------------------------|-------------------------|
| PHC-E-165        | <b><i>Electrocardiograph (ECG): 12 channel</i></b> | RT 2-2016                         | 42295104-00001          |

|                           |                                                                                                                                                                                                                                                                                                                                                                                                                                                                                                                                                                                                                                                                                                                                                                                                                                                                                                                                                                                                                                                                                                                                                                                                                                                                                                                                                                                                                                                                                                                                                                                                                                                                                                                              |
|---------------------------|------------------------------------------------------------------------------------------------------------------------------------------------------------------------------------------------------------------------------------------------------------------------------------------------------------------------------------------------------------------------------------------------------------------------------------------------------------------------------------------------------------------------------------------------------------------------------------------------------------------------------------------------------------------------------------------------------------------------------------------------------------------------------------------------------------------------------------------------------------------------------------------------------------------------------------------------------------------------------------------------------------------------------------------------------------------------------------------------------------------------------------------------------------------------------------------------------------------------------------------------------------------------------------------------------------------------------------------------------------------------------------------------------------------------------------------------------------------------------------------------------------------------------------------------------------------------------------------------------------------------------------------------------------------------------------------------------------------------------|
| Functional Specifications | <p>ELECTROCARDIOGRAPH (12 CHANNEL) with trolley.</p> <p>Twelve channel portable electrocardiograph.</p> <p>The unit must contain a recorder/printer.</p> <p>The unit must have a colour TFT LCD display of approximately 115 x 85mm.</p> <p>High resolution display: at least 800 x 600.</p> <p>The unit must do a self-test at power-on.</p> <p>The following must be displayed:</p> <ul style="list-style-type: none"> <li>Heart rate</li> <li>Patient ID</li> <li>12 lead waveforms</li> <li>Lead identification</li> <li>ECG gain</li> <li>Paper speed</li> <li>Filters</li> <li>Electrode connection indicator</li> <li>Messages and prompts</li> <li>Clock with date and time</li> <li>Battery power status</li> <li>R-R analysis for 30 to 300 sec</li> <li>Pacemaker detection.</li> </ul> <p>The display screen must be capable of displaying two lines of text and a minimum of three ECG waveforms.</p> <p>The unit must be supplied with a 10 lead ECG cable and be able to record 3, 6 and 12 lead configurations.</p> <p>12 lead configuration:</p> <ul style="list-style-type: none"> <li>Lead I, Lead II, Lead III</li> <li>AVR, AVL, AVF</li> <li>V1, V2, V3, V4, V5, V6.</li> </ul> <p>Manual and automatic modes.</p> <p>The unit must be capable of ECG interpretation for paediatric to adult.</p> <p>Full alphanumeric keyboard or touchscreen.</p> <p>The unit must have facility for entering patient data and text.</p> <p>The unit must offer a minimum of six pre-set ECG programs.</p> <p>Unit must be fitted with a selector switch for QRS sound.</p> <p>Event markers.</p> <p>Automatic indication of disconnected leads/electrodes.</p> <p>Automatic check for incorrect lead placement.</p> |
|---------------------------|------------------------------------------------------------------------------------------------------------------------------------------------------------------------------------------------------------------------------------------------------------------------------------------------------------------------------------------------------------------------------------------------------------------------------------------------------------------------------------------------------------------------------------------------------------------------------------------------------------------------------------------------------------------------------------------------------------------------------------------------------------------------------------------------------------------------------------------------------------------------------------------------------------------------------------------------------------------------------------------------------------------------------------------------------------------------------------------------------------------------------------------------------------------------------------------------------------------------------------------------------------------------------------------------------------------------------------------------------------------------------------------------------------------------------------------------------------------------------------------------------------------------------------------------------------------------------------------------------------------------------------------------------------------------------------------------------------------------------|

|                      |                                                                                                                                                                                                                                                                                                                                                                                                                                                                                                                                                                                                                                                                                                                                                                                                                                                                                                                                                                                                                                                                                                                                                                                                                                                                                                                                                                                                                                             |
|----------------------|---------------------------------------------------------------------------------------------------------------------------------------------------------------------------------------------------------------------------------------------------------------------------------------------------------------------------------------------------------------------------------------------------------------------------------------------------------------------------------------------------------------------------------------------------------------------------------------------------------------------------------------------------------------------------------------------------------------------------------------------------------------------------------------------------------------------------------------------------------------------------------------------------------------------------------------------------------------------------------------------------------------------------------------------------------------------------------------------------------------------------------------------------------------------------------------------------------------------------------------------------------------------------------------------------------------------------------------------------------------------------------------------------------------------------------------------|
|                      | <p>Full screen print preview of ECG waveforms prior to printing.</p> <p>Heart rate recognition: peak-to peak detection. 30-300 bpm, accuracy 1 bpm.</p> <p>Electrode connection quality check.</p> <p>Printer.</p> <p>Automatic and manual printout mode.</p> <p>In addition to the required ECG waveforms the printer must be able to print:</p> <ul style="list-style-type: none"> <li>device settings</li> <li>heart rate</li> <li>date and time</li> <li>lead identification</li> <li>calibration pulse</li> <li>patient data.</li> </ul> <p>The ECG printout must be available on A4 size, Z fold paper.</p> <p>Printer quality: 8 dots/mm (vertical), 20 dots/mm (horizontal 25mm/s).</p> <p>Paper speed must be selectable as follows: 5, 25 and 50mm/s.</p> <p>Internal memory capable of storing at least 200 patient files.</p> <p>Facility for transmitting this stored ECG to an external device if and when required.</p> <p>External storage by means of SD card (or other) for 2 000 patient files.</p> <p>Internal protection against damage from 360 J defibrillator discharge.</p> <p>The unit must have an internal battery with integrated charger.</p> <p>Battery capacity: at least 2 hours of continuous recording.</p> <p>The unit must be fully operable from mains power regardless of the internal battery condition.</p> <p>Mains cable at least three metres long with SABS approved 15A three prong plug.</p> |
| Applicable Standards | <p>Must conform to the following standards:</p> <ul style="list-style-type: none"> <li>I EN 60601-1:1990 + A1: 1993 + A2:1995 (General requirements for safety)</li> <li>I EN 60601-1-2:2007 (Electromagnetic compatibility)</li> <li>I EN 60601-2-25:1995 + A1:1999 (Particular requirements for safety of ECGs)</li> <li>I EN 60601-2-51:2003 (Particular requirements for safety).</li> </ul>                                                                                                                                                                                                                                                                                                                                                                                                                                                                                                                                                                                                                                                                                                                                                                                                                                                                                                                                                                                                                                            |

|                            |                                                                                                                                                                                                                                                                                                                                                                                                                                                                                                                                                                                                                                                                                              |
|----------------------------|----------------------------------------------------------------------------------------------------------------------------------------------------------------------------------------------------------------------------------------------------------------------------------------------------------------------------------------------------------------------------------------------------------------------------------------------------------------------------------------------------------------------------------------------------------------------------------------------------------------------------------------------------------------------------------------------|
| Performance Specifications | <p>ECG amplifier specs.</p> <p>Simultaneous acquisition of 12 leads.</p> <p>Frequency response: 0.05-150 Hz.</p> <p>Sensitivity: Automatic or selectable: 2.5-20mm/mV.</p> <p>Automatic amplitude adjustment in the range of 2.5 to 40mm/mV.</p> <p>Sensitivity threshold: 20 <math>\mu</math>V.</p> <p>Input impedance: &gt; 50 M<math>\Omega</math>.</p> <p>Patient leakage current: &lt; 10 <math>\mu</math>A.</p> <p>Calibration pulse: 1 mV.</p> <p>Filters:</p> <ul style="list-style-type: none"> <li>50 Hz</li> <li>Low pass: 25, 35, 75, 100, 150 Hz.</li> </ul> <p>CMRR: &gt; 100 dB.</p> <p>Sampling frequency: 1 kHz.</p> <p>Artefact rejection.</p> <p>Baseline stabiliser.</p> |
| Accessories                | <p>A sturdy trolley to house the ECG machine and accessories must be supplied.</p> <p>Trolley must have at least one drawer.</p> <p>Trolley must have at least four castors, two with brakes.</p> <p>A starter-pack of consumables must be supplied with the unit.</p> <p>The following accessories must be supplied with the unit:</p> <ul style="list-style-type: none"> <li>ECG cable with adaptor clips</li> <li>Operator's manual</li> <li>ECG electrodes: disposable, self-adhesive, for resting ECG PHC-C-212.</li> </ul>                                                                                                                                                             |
| Warranties                 | <p>2 years.</p> <p>5- year maintenance contract.</p>                                                                                                                                                                                                                                                                                                                                                                                                                                                                                                                                                                                                                                         |
| Instructions to Suppliers  | <p>The unit must be handed over in full operating order.</p> <p>List ALL available consumables with prices incl. VAT.</p> <p>List ALL available accessories with prices incl. VAT.</p>                                                                                                                                                                                                                                                                                                                                                                                                                                                                                                       |
| Note to Procurement        | <p>These specifications were unable to discriminate between seven machines, the most expensive of which cost almost 3 times as much as the cheapest. Need to be improved with respect to quality.</p>                                                                                                                                                                                                                                                                                                                                                                                                                                                                                        |

| Catalogue Number | Item Name                    | Available on Transversal Contract | Contract Number or Code |
|------------------|------------------------------|-----------------------------------|-------------------------|
| PHC-E-120        | <b><i>Patella hammer</i></b> | No                                |                         |

|                            |                                                                                                                                                                                                                                                                                                                                                                                                                                                                    |
|----------------------------|--------------------------------------------------------------------------------------------------------------------------------------------------------------------------------------------------------------------------------------------------------------------------------------------------------------------------------------------------------------------------------------------------------------------------------------------------------------------|
| Functional Specifications  | <p>Queen's Square Pattern, Babinski pattern also acceptable. Head is disc-shaped, stainless steel or chrome-plated brass, with doughnut-shaped rubber bumper. Non-hardening rubber bumper.</p> <p>Handle is white nylon, threaded at one end to screw into the head, pointed at the other end to test for the Babinski reflex.</p> <p>Handle length approximately 45cm.</p> <p>Nylon must be flexible, guaranteed non-hardening and shatterproof for 10 years.</p> |
| Applicable Standards       | Expected service life 15 years.                                                                                                                                                                                                                                                                                                                                                                                                                                    |
| Performance Specifications | Must be cleanable and disinfected with standard cleaning solutions.                                                                                                                                                                                                                                                                                                                                                                                                |
| Accessories                |                                                                                                                                                                                                                                                                                                                                                                                                                                                                    |
| Warranties                 | 10 years on handle and rubber bumper.                                                                                                                                                                                                                                                                                                                                                                                                                              |
| Instructions to Suppliers  |                                                                                                                                                                                                                                                                                                                                                                                                                                                                    |
| Note to Procurement        | This specification differs from that of RT 252-01-163 ME, which is for the Dejerine Pattern Percussion Hammer. The Queens Square pattern is more commonly used.                                                                                                                                                                                                                                                                                                    |

| Catalogue Number | Item Name              | Available on Transversal Contract | Contract Number or Code |
|------------------|------------------------|-----------------------------------|-------------------------|
| PHC-E-267        | <b>Peak flow meter</b> | No                                |                         |

|                            |                                                                                                                                                                                                                                    |
|----------------------------|------------------------------------------------------------------------------------------------------------------------------------------------------------------------------------------------------------------------------------|
| Functional Specifications  | <p>Simple aerodynamic, non-electrical device.</p> <p>One-way valve in mouth-piece to prevent inhalation cross-infection.</p> <p>Easy-to-read scale.</p> <p>Professional-grade instrument suitable for multi-patient screening.</p> |
| Applicable Standards       | ISO 23747:2015.                                                                                                                                                                                                                    |
| Performance Specifications | <p>Sterilisable.</p> <p>Measure flow from approximately 50 to 900 l/minute.</p> <p>Repeated readings must show &lt;5% discrepancy.</p> <p>Accuracy must be within 10% of a calibrated spirometer.</p>                              |
| Accessories                | Disposable mouthpiece PHC-C-341.                                                                                                                                                                                                   |
| Warranties                 | 2 years.                                                                                                                                                                                                                           |
| Instructions to Suppliers  | Describe sterilisation method.                                                                                                                                                                                                     |
| Note to Procurement        | PHC-C-341 must fit the procured item.                                                                                                                                                                                              |



| Catalogue Number | Item Name                                     | Available on Transversal Contract | Contract Number or Code |
|------------------|-----------------------------------------------|-----------------------------------|-------------------------|
| PHC-E-139        | <b><i>Pulse oximeter:<br/>stand-alone</i></b> | RT 4                              | RT 4-05-055 ME          |

|                            |                                                                                                                                                                                                                                                             |
|----------------------------|-------------------------------------------------------------------------------------------------------------------------------------------------------------------------------------------------------------------------------------------------------------|
| Functional Specifications  | <p>Portable battery-operated hand-held robust pulse oximeter.</p> <p>Visual display must be brightly illuminated for low-light viewing.</p> <p>Display O<sub>2</sub> saturation, pulse rate, plethysmographic wave form.</p>                                |
| Applicable Standards       | SANS 80601-2-61:2014.                                                                                                                                                                                                                                       |
| Performance Specifications | <p>Oxygen saturation range 0-100%.</p> <p>Pulse range 20-300 beats per minute.</p> <p>Accuracy.</p> <p>Operating temperature 0-50°C.</p> <p>Must be cleanable with standard cleaning and disinfectant solutions.</p> <p>Expected service life: 5 years.</p> |
| Accessories                | Must include one adult and one paediatric re-usable probes.                                                                                                                                                                                                 |
| Warranties                 | 2 years.                                                                                                                                                                                                                                                    |
| Instructions to Suppliers  | Indicate whether re-calibration is necessary. If it is, indicate frequency, method and quote cost.                                                                                                                                                          |
| Note to Procurement        | Replacement re-usable adult and paediatric probes must be in series with this item.                                                                                                                                                                         |

| Catalogue Number | Item Name                                     | Available on Transversal Contract | Contract Number or Code |
|------------------|-----------------------------------------------|-----------------------------------|-------------------------|
| PHC-E-122        | <b><i>Scale: adult, with height board</i></b> | RT 24                             | RT 24-08-005            |

|                            |                                                                                                                                                                                                                                                                                                                                           |
|----------------------------|-------------------------------------------------------------------------------------------------------------------------------------------------------------------------------------------------------------------------------------------------------------------------------------------------------------------------------------------|
| Functional Specifications  | <p>Scale, with large dial.</p> <p>Comply with the specifications on Appendix H, Type 2, see attached.</p> <p>Capacity: at least 150kg, dial to be at least 150mm in diameter.</p> <p>Must include height measuring rod.</p> <p>Mounted on castors, roller size: 30-50mm.</p> <p>Fixed direction, scale to be able to tilt for moving.</p> |
| Applicable Standards       | SANS 1649:2014.                                                                                                                                                                                                                                                                                                                           |
| Performance Specifications | <p>Weighing capacity up to 150kg.</p> <p>Expected service life: 10 years.</p> <p>Accuracy: within 1gm per 1000gm.</p> <p>Repeatability: Standard deviation less than 10gm after 20 measurements at 50kg.</p>                                                                                                                              |
| Accessories                |                                                                                                                                                                                                                                                                                                                                           |
| Warranties                 | 2 years.                                                                                                                                                                                                                                                                                                                                  |
| Instructions to Suppliers  | Specify method, frequency and cost of re-calibration.                                                                                                                                                                                                                                                                                     |
| Note to Procurement        | Future procurement to increase capacity to at least 180Kg, and specify accuracy requirements.                                                                                                                                                                                                                                             |

| Catalogue Number | Item Name                                        | Available on Transversal Contract | Contract Number or Code |
|------------------|--------------------------------------------------|-----------------------------------|-------------------------|
| PHC-E-123        | <b><i>Scale: adult, without height board</i></b> | RT 24                             | RT 24-08-003            |

|                            |                                                                                                                                                                                                                                            |
|----------------------------|--------------------------------------------------------------------------------------------------------------------------------------------------------------------------------------------------------------------------------------------|
| Functional Specifications  | Scale, analog/mechanical, bathroom type, weighing capacity: 0 – 150 kg at least. Large dial display. Spring lever mechanism with vanadium steel spring. Heavy, hardened steel pivots and bearing. Scale must be of robust construction.    |
| Applicable Standards       | SANS 1649:2014.                                                                                                                                                                                                                            |
| Performance Specifications | Weighing capacity up to 150kg.<br>Accuracy: 0.1% throughout measurement range.<br>Expected service life: 15 years.<br>Accuracy: within 10gm per 1000gm.<br>Repeatability: Standard deviation less than 10gm after 20 measurements at 50kg. |
| Accessories                |                                                                                                                                                                                                                                            |
| Warranties                 | 2 years.                                                                                                                                                                                                                                   |
| Instructions to Suppliers  | None.                                                                                                                                                                                                                                      |
| Note to Procurement        | Future procurement to increase capacity to at least 180kg, and specify accuracy requirements.                                                                                                                                              |

| Catalogue Number | Item Name                 | Available on Transversal Contract | Contract Number or Code |
|------------------|---------------------------|-----------------------------------|-------------------------|
| PHC-E-124        | <b><i>Scale: baby</i></b> | RT 24                             | RT 24-08-001            |

|                            |                                                                                                                                                                                                                                                                                           |
|----------------------------|-------------------------------------------------------------------------------------------------------------------------------------------------------------------------------------------------------------------------------------------------------------------------------------------|
| Functional Specifications  | Scale, weighing electronic, baby and child convertible. Battery operated.<br>Automatic switch off.<br>Increments: 10g up to 10kg, 20g > 10kg LCD display: digits at least 20mm high. Electronic damper.<br>Hold feature to retain weight reading. Function to display breast milk intake. |
| Applicable Standards       | None available.                                                                                                                                                                                                                                                                           |
| Performance Specifications | Weighing capacity up to 20kg.<br>Must be accurate within 10gm at 20kg.<br>Repeatability: Standard deviation less than 10gm after 20 measurements at 10kg.<br>Expected service life 10 years.                                                                                              |
| Accessories                | Set of batteries.                                                                                                                                                                                                                                                                         |
| Warranties                 | 2 years.                                                                                                                                                                                                                                                                                  |
| Instructions to Suppliers  | None.                                                                                                                                                                                                                                                                                     |
| Note to Procurement        | None.                                                                                                                                                                                                                                                                                     |

| Catalogue Number | Item Name          | Available on Transversal Contract | Contract Number or Code |
|------------------|--------------------|-----------------------------------|-------------------------|
| PHC-E-125        | <b>Stadiometer</b> | RT 24                             | RT 24-08-009            |

|                            |                                                                                                                                                                                                                                                                                                                                                                                                                                                                                                                                                                                                                                                                                                                                                                                                                                   |
|----------------------------|-----------------------------------------------------------------------------------------------------------------------------------------------------------------------------------------------------------------------------------------------------------------------------------------------------------------------------------------------------------------------------------------------------------------------------------------------------------------------------------------------------------------------------------------------------------------------------------------------------------------------------------------------------------------------------------------------------------------------------------------------------------------------------------------------------------------------------------|
| Functional Specifications  | <p>Stadiometer (Height board).</p> <p>To measure height of children and adults while standing.</p> <p>Range: 20-125cm, graduated in m, cm and mm, with numbers at metre and cm positions.</p> <p>Measuring surface must be free of all moving parts that may affect the markings.</p> <p>Movable headboard must slide easily on the vertical section and lock in the measurement position.</p> <p>Headboard must lock at 90° to the vertical measuring section.</p> <p>Locking mechanism must not affect the measuring surface.</p> <p>Sturdy and stable footplate. Must allow the heels, buttocks and back of the head to make contact with the vertical surface during measurement. Must be made of durable, non-flexible, smooth material that is water resistant, easy to clean, with no sharp edges or unfinished parts.</p> |
| Applicable Standards       | None.                                                                                                                                                                                                                                                                                                                                                                                                                                                                                                                                                                                                                                                                                                                                                                                                                             |
| Performance Specifications | <p>Must be accurate to at least 0,5mm per metre.</p> <p>Expected service life 15 years.</p>                                                                                                                                                                                                                                                                                                                                                                                                                                                                                                                                                                                                                                                                                                                                       |
| Accessories                | None.                                                                                                                                                                                                                                                                                                                                                                                                                                                                                                                                                                                                                                                                                                                                                                                                                             |
| Warranties                 | 2 years on all components.                                                                                                                                                                                                                                                                                                                                                                                                                                                                                                                                                                                                                                                                                                                                                                                                        |
| Instructions to Suppliers  | None.                                                                                                                                                                                                                                                                                                                                                                                                                                                                                                                                                                                                                                                                                                                                                                                                                             |
| Note to Procurement        | None.                                                                                                                                                                                                                                                                                                                                                                                                                                                                                                                                                                                                                                                                                                                                                                                                                             |

| Catalogue Number | Item Name                            | Available on Transversal Contract | Contract Number or Code |
|------------------|--------------------------------------|-----------------------------------|-------------------------|
| PHC-E-126        | <b><i>Stethoscope: dual head</i></b> | No                                |                         |

|                            |                                                                                                                                                                                                                                                                                                                                                                                                                                                                                                                                                                                                                                                                                                                                                                                                                                                                                                                                                                                                                                                                                                                 |
|----------------------------|-----------------------------------------------------------------------------------------------------------------------------------------------------------------------------------------------------------------------------------------------------------------------------------------------------------------------------------------------------------------------------------------------------------------------------------------------------------------------------------------------------------------------------------------------------------------------------------------------------------------------------------------------------------------------------------------------------------------------------------------------------------------------------------------------------------------------------------------------------------------------------------------------------------------------------------------------------------------------------------------------------------------------------------------------------------------------------------------------------------------|
| Functional Specifications  | <p>Stethoscope, binaural twin-head. Head to be one-piece stainless steel or medical-grade aluminium, with air-tight seal between head and shaft. Non-removable bell and non-corrugated diaphragm.</p> <p>Bell to be of shallow type, with replaceable non-chill sleeve. Diaphragm to be of good quality reinforced plastic. Rotation mechanism must have positive click-stop in both bell and diaphragm position, such that head does not rotate during auscultation.</p> <p>Tubing must be of sufficient thickness to attenuate environmental noise. Latex-free material. Single tube (although may be double-lumen). Longer tube length preferred (minimum 70cm from earpiece to head). Ear tubes must be adjustable (i.e. rotatable) or angled forward at 15 degrees.</p> <p>Tubes must be of stainless steel with screw-on earpieces. Junction between tubes and earpieces must be airtight. Headpiece spring may be internal (preferred) or external, stainless steel or chrome-plated spring steel. Earpieces should be soft, formfitting, but standard hard plastic earpieces must also be supplied.</p> |
| Applicable Standards       | None available.                                                                                                                                                                                                                                                                                                                                                                                                                                                                                                                                                                                                                                                                                                                                                                                                                                                                                                                                                                                                                                                                                                 |
| Performance Specifications | <p>Head must amplify low frequency &lt;100hz by approximately 15db, attenuate higher frequencies &gt;500hz. <b>Performance certificate required.</b></p> <p>Entire unit must be disinfectable with standard solutions.</p> <p>Expected service life: 15 years.</p>                                                                                                                                                                                                                                                                                                                                                                                                                                                                                                                                                                                                                                                                                                                                                                                                                                              |
| Accessories                | Unit to be supplied complete with spare diaphragm and earpieces.                                                                                                                                                                                                                                                                                                                                                                                                                                                                                                                                                                                                                                                                                                                                                                                                                                                                                                                                                                                                                                                |
| Warranties                 | Minimum 5 year guarantee on all components, including rotation of head and headpiece spring (at least 100 000 rotations and flexions).                                                                                                                                                                                                                                                                                                                                                                                                                                                                                                                                                                                                                                                                                                                                                                                                                                                                                                                                                                          |
| Instructions to Suppliers  | <p>An optional model with paediatric head to be proposed.</p> <p>Specify any cleaning materials not compatible with the unit.</p>                                                                                                                                                                                                                                                                                                                                                                                                                                                                                                                                                                                                                                                                                                                                                                                                                                                                                                                                                                               |
| Note to Procurement        |                                                                                                                                                                                                                                                                                                                                                                                                                                                                                                                                                                                                                                                                                                                                                                                                                                                                                                                                                                                                                                                                                                                 |

| Catalogue Number | Item Name                  | Available on Transversal Contract | Contract Number or Code |
|------------------|----------------------------|-----------------------------------|-------------------------|
| PHC-E-127        | <b><i>Syringe: Ear</i></b> | No                                |                         |

|                            |                                                                                                        |
|----------------------------|--------------------------------------------------------------------------------------------------------|
| Functional Specifications  | Stainless steel cylinder and plunger. Finger rings or half-rings for one-handed control of irrigation. |
| Applicable Standards       | None available.                                                                                        |
| Performance Specifications | Must be cleanable and disinfected with standard solutions.<br>Envisaged service life minimum 15 years. |
| Accessories                | Re-usable silicon rubber tips.                                                                         |
| Warranties                 | Minimum 2 years.                                                                                       |
| Instructions to Suppliers  |                                                                                                        |
| Note to Procurement        |                                                                                                        |

| Catalogue Number | Item Name                                    | Available on Transversal Contract | Contract Number or Code |
|------------------|----------------------------------------------|-----------------------------------|-------------------------|
| PHC-E-130        | <b><i>Thermometer: digital, ear-type</i></b> | No                                |                         |

|                            |                                                                                                                                                                                                                                                                                                                                              |
|----------------------------|----------------------------------------------------------------------------------------------------------------------------------------------------------------------------------------------------------------------------------------------------------------------------------------------------------------------------------------------|
| Functional Specifications  | <p>Ear type thermometer.</p> <p>Hand-held, battery operated, batteries in handle. Batteries may be conventional alkaline or rechargeable (if the latter, price must include charger) Probe tip and sensor. Probe cover detection system. Automatic probe cover eject button. Easy-to-read, LCD displays temperatures in degrees Celsius.</p> |
| Applicable Standards       | None available.                                                                                                                                                                                                                                                                                                                              |
| Performance Specifications | <p>Accuracy within 0.1°C.</p> <p>Must be cleanable with standard cleaning and disinfectant solutions.</p> <p>Expected service life: 10 years.</p>                                                                                                                                                                                            |
| Accessories                | None.                                                                                                                                                                                                                                                                                                                                        |
| Warranties                 | 2-year guarantee.                                                                                                                                                                                                                                                                                                                            |
| Instructions to Suppliers  | <p>Supplier to provide pricing of probe covers and any other spares/consumables. Supplier to indicate expected length of operation on one set of batteries or one charge. If rechargeable, state expected battery life under normal operation.</p> <p>State expected Mean Time Before Failure of the unit.</p>                               |
| Note to Procurement        | Disposable probe covers PHC-C-178 to be in series with this item.                                                                                                                                                                                                                                                                            |



| Catalogue Number | Item Name                                   | Available on Transversal Contract | Contract Number or Code |
|------------------|---------------------------------------------|-----------------------------------|-------------------------|
| PHC-E-131        | <b><i>Thermometer, digital pen type</i></b> | No                                |                         |

|                            |                                                                                                                                                                                                                                               |
|----------------------------|-----------------------------------------------------------------------------------------------------------------------------------------------------------------------------------------------------------------------------------------------|
| Functional Specifications  | Pen-type thermometer.<br>Electronic clinical thermometer, with easily visible digital display in degrees Celsius. Rapid measuring time, less than 10 secs. Auto-switch-off. Waterproof, impact-resistant, disinfectable. Replaceable battery. |
| Applicable Standards       | None available.                                                                                                                                                                                                                               |
| Performance Specifications | Accuracy within 0.1°C.<br>Must be cleanable with standard cleaning and disinfectant solutions.                                                                                                                                                |
| Accessories                | None.                                                                                                                                                                                                                                         |
| Warranties                 | 2-year guarantee.                                                                                                                                                                                                                             |
| Instructions to Suppliers  | If replaceable sheaths are available, supplier to supply pricing.                                                                                                                                                                             |
| Note to Procurement        | If replaceable sheaths are available, to be in series with this item.                                                                                                                                                                         |

| Catalogue Number | Item Name                      | Available on Transversal Contract | Contract Number or Code |
|------------------|--------------------------------|-----------------------------------|-------------------------|
| PHC-E-121        | <b><i>Torch: pupillary</i></b> | No                                |                         |

|                            |                                                                                                                                                                                                                                                                                                                                                             |
|----------------------------|-------------------------------------------------------------------------------------------------------------------------------------------------------------------------------------------------------------------------------------------------------------------------------------------------------------------------------------------------------------|
| Functional Specifications  | <p>One or two-cell pupil examination penlight torch.</p> <p>Pushbutton latching on-off switch. No sliding or rotary switch, no push-to-hold switch.</p> <p>Single super-bright white LED light source (no multi-LED types).</p> <p>Non-slip body, preferably splash-proof.</p> <p>Must be cleanable and disinfectable with standard cleaning solutions.</p> |
| Applicable Standards       | None.                                                                                                                                                                                                                                                                                                                                                       |
| Performance Specifications | <p>Must have a uniform beam of light at up to 50cm – no dark centre spot with bright outer ring.</p> <p>Must withstand a 1m drop onto a concrete surface, without malfunction.</p> <p>Expected service life 10 years.</p>                                                                                                                                   |
| Accessories                | Two sets of non-corrosive batteries.                                                                                                                                                                                                                                                                                                                        |
| Warranties                 | Warranted free of manufacturing defects for a 6-month period.                                                                                                                                                                                                                                                                                               |
| Instructions to Suppliers  | None.                                                                                                                                                                                                                                                                                                                                                       |
| Note to Procurement        | None.                                                                                                                                                                                                                                                                                                                                                       |

| Catalogue Number | Item Name                     | Available on Transversal Contract | Contract Number or Code |
|------------------|-------------------------------|-----------------------------------|-------------------------|
| PHC-E-132        | <b><i>Tuning fork set</i></b> | No                                |                         |

|                            |                                                                                                                                                                                                             |
|----------------------------|-------------------------------------------------------------------------------------------------------------------------------------------------------------------------------------------------------------|
| Functional Specifications  | Tuning fork to be manufactured from medical grade stainless steel. Attached flat base for vibration and bone conduction tests. Models without weights on tines preferred. Set of one each 128Hz and 256Hz . |
| Applicable Standards       | None available.                                                                                                                                                                                             |
| Performance Specifications | Each fork to be clearly marked with vibration frequency.<br>Accurate to 0,2 HZ.<br>Expected service life: 20 years.                                                                                         |
| Accessories                | None.                                                                                                                                                                                                       |
| Warranties                 | None.                                                                                                                                                                                                       |
| Instructions to Suppliers  |                                                                                                                                                                                                             |
| Note to Procurement        |                                                                                                                                                                                                             |

## Essential

| Catalogue Number | Item Name                                                               | Available on Transversal Contract | Contract Number or Code |
|------------------|-------------------------------------------------------------------------|-----------------------------------|-------------------------|
| PHC-E-111        | <b><i>Examination light: clinical. Ceiling-mounted, directional</i></b> | RT 2                              | 41111931-00002          |

|                            |                                                                                                                                                                                                                                                                                                                                                                                                                                                                                                           |
|----------------------------|-----------------------------------------------------------------------------------------------------------------------------------------------------------------------------------------------------------------------------------------------------------------------------------------------------------------------------------------------------------------------------------------------------------------------------------------------------------------------------------------------------------|
| Functional Specifications  | <p>Ceiling-mounted examination light for general medical examination. LED light source. Easy switching method. Self-balancing mechanism (spring or friction clutch based), so that the light head holds its position wherever directed. To have sufficient swing radius to cover both ends of standard examination couch, from a mounting point on ceiling at mid-length of the couch.</p> <p>Adequate length of suitable approved electrical cable, to permit connection to in-ceiling power outlet.</p> |
| Applicable Standards       | IEC 60601-1, IEC 60601-1-2 and IEC 60601-2-41.                                                                                                                                                                                                                                                                                                                                                                                                                                                            |
| Performance Specifications | <p>Daylight colour temperature of light source (~6000K).</p> <p>Light intensity at least 35 000 lux at 60cm.</p> <p>Must be cleanable and disinfectable with standard solutions.</p>                                                                                                                                                                                                                                                                                                                      |
| Accessories                | To be supplied with wall mounting hardware.                                                                                                                                                                                                                                                                                                                                                                                                                                                               |
| Warranties                 | Minimum 5 year Guarantee on all parts including light source.                                                                                                                                                                                                                                                                                                                                                                                                                                             |
| Instructions to Suppliers  | <p>Supplier must specify power connection type and any structural mounting (i.e. load-bearing) requirements.</p> <p>Supplier must specify available after-sales support, with relevant pricing.</p> <p>Supplier must supply certificate issued by Directorate of Radiation Control of the Department of Health, in terms of the Hazardous Substances Act ( Act 15 of 1973).</p>                                                                                                                           |
| Note to Procurement        | Spare LED bulbs to be in series with this item.                                                                                                                                                                                                                                                                                                                                                                                                                                                           |

| Catalogue Number | Item Name                                 | Available on Transversal Contract | Contract Number or Code |
|------------------|-------------------------------------------|-----------------------------------|-------------------------|
| PHC-E-098        | <b><i>Examination light: headlamp</i></b> | No                                |                         |

|                            |                                                                                                                                                                                                                                                                                                                                                                                                                                                                                                                                                        |
|----------------------------|--------------------------------------------------------------------------------------------------------------------------------------------------------------------------------------------------------------------------------------------------------------------------------------------------------------------------------------------------------------------------------------------------------------------------------------------------------------------------------------------------------------------------------------------------------|
| Functional Specifications  | <p>Lightweight head-worn LED light.</p> <p>Adjustable headband, with over-the-head strap to prevent slippage.</p> <p>Tilt-adjustable. CREE LED element. Daylight colour temperature preferred.</p> <p>Easy access on-off switch on lamp. Easy access focus ring on lamp.</p> <p>Rechargeable Lithium-ion batteries – on headband or belt-worn.</p> <p>Should also accept equivalent size of alkaline cells in emergency.</p> <p>Intermittent flash, different power modes not required.</p> <p>Splashproof, at least Ingress Protection 44 rating.</p> |
| Applicable Standards       |                                                                                                                                                                                                                                                                                                                                                                                                                                                                                                                                                        |
| Performance Specifications | <p>Max weight of headgear less than 180gm.</p> <p>Minimum light output 200 lumens.</p> <p>Operating time at least 5 hours on full output.</p> <p>Focusable from narrow to wide beam.</p> <p>Beam must project light uniformly at 1 metre – no rings or dark spots.</p> <p>Must be cleanable and disinfectable.</p>                                                                                                                                                                                                                                     |
| Accessories                | Charger, all cables. Complete with Li-Ion batteries.                                                                                                                                                                                                                                                                                                                                                                                                                                                                                                   |
| Warranties                 | 1 year.                                                                                                                                                                                                                                                                                                                                                                                                                                                                                                                                                |
| Instructions to Suppliers  |                                                                                                                                                                                                                                                                                                                                                                                                                                                                                                                                                        |
| Note to Procurement        | Spare LED bulbs to be in series with this item.                                                                                                                                                                                                                                                                                                                                                                                                                                                                                                        |

| Catalogue Number | Item Name                                                        | Available on Transversal Contract | Contract Number or Code |
|------------------|------------------------------------------------------------------|-----------------------------------|-------------------------|
| PHC-E-154        | <b><i>Examination light:<br/>mobile, without<br/>battery</i></b> | RT 2-2016                         | 41111931-00004          |
|                  |                                                                  |                                   |                         |

|                            |                                                                                                                                                                                                                                                                                                                                                                                                                                                                                                                                                                                     |
|----------------------------|-------------------------------------------------------------------------------------------------------------------------------------------------------------------------------------------------------------------------------------------------------------------------------------------------------------------------------------------------------------------------------------------------------------------------------------------------------------------------------------------------------------------------------------------------------------------------------------|
| Functional Specifications  | <p>Mobile examination light for general medical examination. LED light source. Easy switching method. Self-balancing mechanism (spring- or friction clutch-based), so that the light head holds its position wherever directed. To have sufficient swing radius to cover both ends of standard examination couch, from a standing point on floor at mid-length of the couch.</p> <p>Unit mounted on tilt-resistant base, with castors.</p> <p>Epoxy-coated steel construction.</p> <p>Power cord to be fixed to light, 3meter length with moulded SABS approved 15A 3-pin plug.</p> |
| Applicable Standards       | <p>IEC 60601-1, IEC 60601-1- 2 and IEC 60601-2-41.</p> <p>SANS 778 paragraph 5.2, SANS 621.</p>                                                                                                                                                                                                                                                                                                                                                                                                                                                                                     |
| Performance Specifications | <p>Daylight colour temperature of light source (6000 K).</p> <p>Light intensity at least 35 000 lux at 60cm.</p> <p>Must be cleanable and disinfected with standard solutions.</p>                                                                                                                                                                                                                                                                                                                                                                                                  |
| Accessories                |                                                                                                                                                                                                                                                                                                                                                                                                                                                                                                                                                                                     |
| Warranties                 | <p>Minimum 5yr Guarantee on all parts including light source.</p>                                                                                                                                                                                                                                                                                                                                                                                                                                                                                                                   |
| Instructions to Suppliers  | <p>Supplier must specify available after-sales support, with relevant pricing.</p> <p>Supplier must supply certificate issued by Directorate of Radiation Control of the Department of Health, in terms of the Hazardous Substances Act ( Act 15 of 1973).</p>                                                                                                                                                                                                                                                                                                                      |
| Note to Procurement        | <p>Spare LED bulbs to be in series with this item.</p>                                                                                                                                                                                                                                                                                                                                                                                                                                                                                                                              |

| Catalogue Number | Item Name                                                            | Available on Transversal Contract | Contract Number or Code |
|------------------|----------------------------------------------------------------------|-----------------------------------|-------------------------|
| PHC-E-110        | <b><i>Examination light: clinical, wall-mounted, directional</i></b> | RT 2                              | 41111931-00005          |

|                            |                                                                                                                                                                                                                                                                                                                                                                               |
|----------------------------|-------------------------------------------------------------------------------------------------------------------------------------------------------------------------------------------------------------------------------------------------------------------------------------------------------------------------------------------------------------------------------|
| Functional Specifications  | Wall-mounted examination light for general medical examination. LED light source. Easy switching method. Self-balancing mechanism (spring or friction clutch-based), so that the light head holds its position wherever directed. To have sufficient swing radius to cover both ends of standard examination couch, from a mounting point on wall at mid-length of the couch. |
| Applicable Standards       | IEC 60601-1, IEC 60601-1- 2 and IEC 60601-2-41.                                                                                                                                                                                                                                                                                                                               |
| Performance Specifications | Daylight colour temperature of light source (~6000K).<br>Light intensity at least 35 000 lux at 60cm.<br>Power cord to be fixed to light, 2m length with moulded SABS approved 15A 3-pin plug.<br>Must be cleanable and disinfected with standard solutions.                                                                                                                  |
| Accessories                | To be supplied with wall mounting hardware.                                                                                                                                                                                                                                                                                                                                   |
| Warranties                 | Minimum 5years on all parts including light source.                                                                                                                                                                                                                                                                                                                           |
| Instructions to Suppliers  | Supplier must specify available after-sales support, with relevant pricing.<br>Supplier must supply certificate issued by Directorate of Radiation Control of the Department of Health, in terms of the Hazardous Substances Act ( Act 15 of 1973).<br>Supplier to specify ceiling load-bearing and fixing requirements.                                                      |
| Note to Procurement        | Spare LED bulbs to be in series with this item.                                                                                                                                                                                                                                                                                                                               |

| Catalogue Number | Item Name                            | Available on Transversal Contract | Contract Number or Code |
|------------------|--------------------------------------|-----------------------------------|-------------------------|
| PHC-E-113        | <b><i>Tape measure: clinical</i></b> | No                                |                         |

|                            |                                                                                                                                                                                                                                            |
|----------------------------|--------------------------------------------------------------------------------------------------------------------------------------------------------------------------------------------------------------------------------------------|
| Functional Specifications  | Flat tailor-type tape measure, in durable flexible plastic or fiberglass.<br>Durable, non-fade, non-smudge, high-contrast markings in millimetres and centimetres.<br>The ends of the tape may be reinforced with plastic or metal strips. |
| Applicable Standards       | None.                                                                                                                                                                                                                                      |
| Performance Specifications | Non-stretch tape.<br>Length must be at least 150cm.<br>Must be cleanable with standard cleaning and disinfectant solutions.                                                                                                                |
| Accessories                |                                                                                                                                                                                                                                            |
| Warranties                 | None.                                                                                                                                                                                                                                      |
| Instructions to Suppliers  | None.                                                                                                                                                                                                                                      |
| Note to Procurement        | Before finalising procurement, test tape for accuracy by comparing to a certified steel 1m ruler, and then applying tension to the tape to check for non-stretchability.                                                                   |



| Catalogue Number | Item Name     | Available on Transversal Contract | Contract Number or Code |
|------------------|---------------|-----------------------------------|-------------------------|
| PHC-E-151        | <b>Bedpan</b> | RT 24                             | RT 24-03-001            |

|                            |                                                                                                                                                                                                                                                                                                                                                                                                                                 |
|----------------------------|---------------------------------------------------------------------------------------------------------------------------------------------------------------------------------------------------------------------------------------------------------------------------------------------------------------------------------------------------------------------------------------------------------------------------------|
| Functional Specifications  | <p>For urine collection from female patients.</p> <p>Standard Oval or Triangular contour bedpan.</p> <p>Stainless steel, one-piece body.</p> <p>Polished, smooth contours, no sharp edges.</p>                                                                                                                                                                                                                                  |
| Applicable Standards       |                                                                                                                                                                                                                                                                                                                                                                                                                                 |
| Performance Specifications | <p>Must be sufficiently robust to support 180kg weight across the top of the unit (while resting on a solid surface), without distorting.</p> <p>Must be autoclaveable.</p>                                                                                                                                                                                                                                                     |
| Accessories                |                                                                                                                                                                                                                                                                                                                                                                                                                                 |
| Warranties                 | 10 years.                                                                                                                                                                                                                                                                                                                                                                                                                       |
| Instructions to Suppliers  |                                                                                                                                                                                                                                                                                                                                                                                                                                 |
| Note to Procurement        | <p>These specifications differ from those in RT 24, which are for a slipper-shaped plastic bedpan. The latter is more suitable for bed-ridden patients. The model described here is more suitable for ambulant female patients.</p> <p>When procurement according to these specifications commences, a 6-unit bedpan stand, to be mounted in the sluice-room, should also be procured. Stand must comply with CKS 217:2010.</p> |

| Catalogue Number | Item Name                        | Available on Transversal Contract | Contract Number or Code |
|------------------|----------------------------------|-----------------------------------|-------------------------|
| PHC-E-158        | <b><i>Urine jar or flask</i></b> | RT 24                             | RT 24-01-010            |

|                            |                                                                                                                                                        |
|----------------------------|--------------------------------------------------------------------------------------------------------------------------------------------------------|
| Functional Specifications  | Stainless Steel jar or flask, with broad base to resist tipping. Inverted cone design ideal.<br>With or without hinged lid.                            |
| Applicable Standards       |                                                                                                                                                        |
| Performance Specifications | At least 600ml.<br>Must be autoclaveable.                                                                                                              |
| Accessories                |                                                                                                                                                        |
| Warranties                 | 10 years.                                                                                                                                              |
| Instructions to Suppliers  |                                                                                                                                                        |
| Note to Procurement        | These specifications differ from those in RT 24, which are for a plastic measuring jug.<br>These specifications should be used in future procurements. |

# Specialised

## RESUSCITATION

| Catalogue Number | Item Name                                            | Available on Transversal Contract | Contract Number or Code |
|------------------|------------------------------------------------------|-----------------------------------|-------------------------|
| PHC-E-133        | <b><i>Automated external defibrillator (AED)</i></b> | RT 4                              | RT 4-05-072-A-ME        |

### Functional Specifications

The unit being offered must be a button operation Biphasic semi-automated external defibrillator and it must be suitable for ground mobile, ambulance use and ward use in hospitals.

It must be robustly constructed.

It must incorporate the latest and reliable Biphasic technology.

The unit offered must be able to perform impedance compensation before delivering a shock to a patient.

The supplier must state the minimum and maximum defibrillator energy charge that is available on the unit being offered for when unit is in manual mode.

The unit must provide clearly visible screen text messages and clear audio voice prompts in the english language to guide the user through the whole operational of the unit.

The visible screen text messages must be clearly visible under all lighting conditions.

The supplier must state the total weight of the unit including the battery.

The unit offered must function off a reliable rechargeable battery and must include the charger with a reconditioning button in the final price.

Must be provided with additional set of backup batteries to ensure continuous operation.

The unit must offer automated self-checks and manual check must be carried out every time the machine is switched on as well as weekly and monthly, and all the data of the self-check must be stored in the internal memory.

The weekly and monthly automated self-check must include at least the following: battery, internal electronic circuitry and energy charges.

The unit must be fitted with an audible alarm if any of self-tests or battery fails as well as a LCD screen that will indicate a failure of the device. The unit must have a minimum of 10 audible and 10 visual screen prompts.

The length of the pad connecting cable must be at least 0.8 meters.

The unit must be supplied with a patient cable that will be able to be connected to ECG electrodes for monitoring without connecting the pads.

The ECG Waveform screen must be a backlit LCD screen with a size of at least 6cm x 4cm or 6cm diagonally.

The unit must be supplied with a screen protector and or protective device.

The unit must be able to be configured for paediatric patients. Paediatric adaptor, pads/all paddles should be included.

The unit must have a manual override with password protection.

The unit must be able to download information to a computer for legal purposes.

The supplier must supply a set of disposable defibrillator pads, which includes the connecting cable and the cost of this set of defibrillator pads must be included in the final bid price.

The disposable defibrillator pads for the unit offered must have a shelf life of at least 2 years.

A carry case constructed of durable waterproof material, which has should straps must be supplied and included in the final bid price.

The carry case offered must adequately protect the unit when used by ambulance and emergency personnel in poor and wet weather conditions.

|                            |                                                                                                                                                                                                                                                                                                                                                                                                                                                                                                                                                                                                                                                                                                                                                                                          |
|----------------------------|------------------------------------------------------------------------------------------------------------------------------------------------------------------------------------------------------------------------------------------------------------------------------------------------------------------------------------------------------------------------------------------------------------------------------------------------------------------------------------------------------------------------------------------------------------------------------------------------------------------------------------------------------------------------------------------------------------------------------------------------------------------------------------------|
| Applicable Standards       | <p>The unit must conform to IEC601-2-4.</p> <p>“Particular requirements for the safety of cardiac defibrillators”.</p> <p>The unit shall comply with the necessary safety standards.</p> <p>The unit must be able to withstand vibration and shock as per Mil Std 810E or Equivalent.</p> <p>The supplier must provide details.</p> <p>The unit offered must be water resistant to a rating of at least IEC 529 IPX4. Supplier must provide details.</p> <p>The unit must be aviation certified.</p>                                                                                                                                                                                                                                                                                     |
| Performance Specifications | <p>The unit offered must be lightweight less than 4kg.</p> <p>The rechargeable batteries must have a capacity of a minimum of 50 x 150J shocks or at least 2 hours of monitoring time.</p> <p>The rechargeable batteries must have a charge time of less than 3 hours.</p> <p>The unit must be able to withstand droppage of at least 1m on any corner. Supplier must provide details.</p> <p>To be splash proof.</p> <p>The unit must be equipped with internal memory of a minimum of 1GB.</p> <p>The unit must be equipped with a serial port, USB or data card system for download purposes.</p> <p>The software to download must be included in the bid price and supplied with every AED delivered by the successful supplier.</p> <p>Expected service life: at least 8 years.</p> |
| Accessories                | <p>All accessories will be supplied with the unit at no additional cost.</p> <p>The unit must be supplied with two rechargeable batteries and the charger unit.</p>                                                                                                                                                                                                                                                                                                                                                                                                                                                                                                                                                                                                                      |
| Warranties                 | <p>Minimum mandatory guarantee is 2 years. 5 years preferred.</p> <p>The unit must be offered with a minimum of a 2 year full unconditional replacement operating battery guarantee.</p> <p>The disposable defibrillator pads for the unit offered must have a shelf life of at least 2 years.</p>                                                                                                                                                                                                                                                                                                                                                                                                                                                                                       |

|                           |                                                                                                                                                                                                                                                                                                                                                                                                                                                                                                                                                                                                                                                                                                                                                                                                                                                                                                                                                                                                                                                                                                                                                                                                                                                                                                                                                                                                                                                                                                                                                                                                                                                                                                                                                                          |
|---------------------------|--------------------------------------------------------------------------------------------------------------------------------------------------------------------------------------------------------------------------------------------------------------------------------------------------------------------------------------------------------------------------------------------------------------------------------------------------------------------------------------------------------------------------------------------------------------------------------------------------------------------------------------------------------------------------------------------------------------------------------------------------------------------------------------------------------------------------------------------------------------------------------------------------------------------------------------------------------------------------------------------------------------------------------------------------------------------------------------------------------------------------------------------------------------------------------------------------------------------------------------------------------------------------------------------------------------------------------------------------------------------------------------------------------------------------------------------------------------------------------------------------------------------------------------------------------------------------------------------------------------------------------------------------------------------------------------------------------------------------------------------------------------------------|
| Instructions to Suppliers | <p>Consumables should be quoted for separate sourcing as after-sales services.</p> <p>Supplier to indicate which consumables and non-consumables items is required for the normal operation and standard maintenance of the equipment during the guarantee period.</p> <p>The equipment may be maintained by the purchaser after the guarantee period has expired, therefore: The supplier must provide detailed preventative maintenance and calibration procedures. The supplier must provide technical training in the theory of operation, fault finding and calibration.</p> <p>Manuals must be comprehensive, including circuit diagrams in case of electronic/electrical equipment, enabling resident technical staff to deliver complete technical support in case of equipment failure, as well as routine servicing.</p> <p>Manuals will be treated as confidential and for the sole use on equipment owned by the purchasing department.</p> <p>The supply of workshop/service manuals is a mandatory requirement of this bid and they must be in accordance with the requirements laid down above.</p> <p>The complete unit must include each replaceable accessory as specified in a series at no additional cost. The cost must be included in the final bid price.</p> <p>The supplier must undertake to provide a comprehensive training schedule when required, for end-user departments and clinical engineering staff of the end users department to ensure:</p> <ul style="list-style-type: none"> <li>Correct use of equipment</li> <li>Comprehensive technical support capability of the equipment, of at least 2nd level by eligible resident clinical engineering staff.</li> </ul> <p>Training of users shall be provided at no extra cost.</p> |
| Note to Procurement       | <p>This equipment is part of a series, from RT 4-05-072-A-ME to RT 4-05-076-A-ME, inclusive. Any replacement should have equivalent serialisation. Replacement pads RT 4-05-105 ME and RT 4-05-106 ME.</p>                                                                                                                                                                                                                                                                                                                                                                                                                                                                                                                                                                                                                                                                                                                                                                                                                                                                                                                                                                                                                                                                                                                                                                                                                                                                                                                                                                                                                                                                                                                                                               |

| Catalogue Number | Item Name                          | Available on Transversal Contract | Contract Number or Code |
|------------------|------------------------------------|-----------------------------------|-------------------------|
| PHC-E-134        | <b><i>Cardiac arrest board</i></b> | No                                |                         |

|                            |                                                                                                                                                                                                                                                                                                                                                                                                                                                                  |
|----------------------------|------------------------------------------------------------------------------------------------------------------------------------------------------------------------------------------------------------------------------------------------------------------------------------------------------------------------------------------------------------------------------------------------------------------------------------------------------------------|
| Functional Specifications  | <p>Rigid, smooth board with rounded corners and smooth edges, to be inserted under the thorax of an unconscious patient.</p> <p>The board must provide a firm base against which to perform chest compression.</p> <p>For ease of insertion and removal, must have no rough fabric-snagging details.</p> <p>Cut-out hand-holds.</p> <p>Size approximately 60x40cm. Thickness minimum 10mm.</p> <p>Material: polypropylene, ABS or quality varnished plywood.</p> |
| Applicable Standards       | None.                                                                                                                                                                                                                                                                                                                                                                                                                                                            |
| Performance Specifications | Must be cleanable with standard cleaning and disinfectant solutions.                                                                                                                                                                                                                                                                                                                                                                                             |
| Accessories                | None.                                                                                                                                                                                                                                                                                                                                                                                                                                                            |
| Warranties                 |                                                                                                                                                                                                                                                                                                                                                                                                                                                                  |
| Instructions to Suppliers  | None.                                                                                                                                                                                                                                                                                                                                                                                                                                                            |
| Note to Procurement        | Usually supplied with Emergency Trolley RT 24-12-01 but can be ordered as replacement or addition.                                                                                                                                                                                                                                                                                                                                                               |

| Catalogue Number | Item Name                                        | Available on Transversal Contract | Contract Number or Code |
|------------------|--------------------------------------------------|-----------------------------------|-------------------------|
| PHC-E-190        | <b><i>Infant warmer:<br/>radiant, mobile</i></b> | RT2-2016                          | 42191811-00001          |

## Functional Specifications

The unit must offer long-term care of a neonate.

## PLATFORM AND MATTRESS:

Adjustable tilt to Trendelenburg and reverse Trendelenburg positions

Locking mechanism to keep the mattress platform locked in all positions

The mattress must be waterproof and must be X-ray transparent

Mattress size: approximately 500 x 650 mm

Mattress thickness: at least 25 mm

Mattress must support patient weight up to 4,5 kg

All four sides of the platform must be fitted with transparent guards/panels

The front and two side panels must be hinged.

## HEATER

Radiant heater housed in an overhead canopy, with internal reflector, mounted on the rear mainframe.

Indicator to show heater is switched ON.

The overhead canopy must swivel left and right and must lock in the desired position.

## CONTROLS

Heat control: adjustable heater power from 0 - 100%.

If a malfunction occurs affecting safety or performance the heater must be automatically turned off.

Skin temperature probe to monitor infant temperature.

Heat output must be controlled manually or through baby mode (feedback mode) for thermoregulation.

## DISPLAYS

Heater power.

Alarms.

Visual and audio alarms must be present for safety.

Apgar timer, with audible alarm, with digital display: 1, 5 and 10 minutes elapsed time.

Apgar timer with on/off switch and reset button.

## OTHER

The overhead canopy must be provided with an examination lamp, with on/off switch.

The infant radiant warmer must have a drawer.

The minimum acceptable height of the heater canopy must be 1.85 metres above floor.

Adjustable mattress platform height with a minimum of 900 mm.

The mains cable of the unit must be at least three metres long and be fitted with an SABS approved 15A three pin plug.

The unit must be mobile, but stable during movement.

4 swivel castors of minimum diameter 100 mm.

Two of the castors must be lockable.

|                            |                                                                                                                                                                                                                                                                                                                                                                                                                                                                                                                                                                                                                                                                                                                                                                                                                                                                                                                                                                             |
|----------------------------|-----------------------------------------------------------------------------------------------------------------------------------------------------------------------------------------------------------------------------------------------------------------------------------------------------------------------------------------------------------------------------------------------------------------------------------------------------------------------------------------------------------------------------------------------------------------------------------------------------------------------------------------------------------------------------------------------------------------------------------------------------------------------------------------------------------------------------------------------------------------------------------------------------------------------------------------------------------------------------|
| Applicable Standards       | SANS/ANSI/AAMI/IEC 60601-2-21:2009 (Particular Requirements for the Safety of Infant Radiant Warmers). The relevant certification from the manufacturer must be supplied.                                                                                                                                                                                                                                                                                                                                                                                                                                                                                                                                                                                                                                                                                                                                                                                                   |
| Performance Specifications | <p>Must maintain temperature within 0,5°C of setting.</p> <p>Automatic shut-off if temperature exceeds maximum setting, until temperature drops back to within required range.</p> <p>Temperature sensitivity &lt;0,2C.</p> <p>Antibacterial mattress cover.</p>                                                                                                                                                                                                                                                                                                                                                                                                                                                                                                                                                                                                                                                                                                            |
| Accessories                | <p>Complete with re-usable temperature probe, mattress, power cable.</p> <p>A starter-pack of consumables must be supplied with the unit.</p>                                                                                                                                                                                                                                                                                                                                                                                                                                                                                                                                                                                                                                                                                                                                                                                                                               |
| Warranties                 | 2 years.                                                                                                                                                                                                                                                                                                                                                                                                                                                                                                                                                                                                                                                                                                                                                                                                                                                                                                                                                                    |
| Instructions to Suppliers  | <p>To be supplied with 5-year maintenance contract.</p> <p>Specify maintenance routines and service intervals.</p> <p>The unit must be handed over in full operating order.</p> <p>List ALL available consumables with prices incl. VAT.</p> <p>List ALL available accessories with prices incl. VAT.</p> <p>Optional Items, quote prices incl. VAT.</p> <p>LED Phototherapy.</p> <p>The phototherapy light must be either built into the overhead heater canopy or it must be a separate dedicated module that mounts onto the side of the overhead heater canopy.</p> <p>The phototherapy light must work off the 220 Volt, 50 Hz single-phase supply.</p> <p>The phototherapy light must produce UV light with a wavelength between 450 and 470nm.</p> <p>The phototherapy light must have an intensity &gt;30uW/cm<sup>2</sup>/µm.</p> <p>IV pole.</p> <p>Disposable temperature probe.</p> <p>Accessory rail.</p> <p>Monitor stand.</p> <p>Oxygen cylinder holder.</p> |
| Note to Procurement        | Note that there has been a split award. Any spares must be compatible with chosen model.                                                                                                                                                                                                                                                                                                                                                                                                                                                                                                                                                                                                                                                                                                                                                                                                                                                                                    |



| Catalogue Number | Item Name                                         | Available on Transversal Contract | Contract Number or Code |
|------------------|---------------------------------------------------|-----------------------------------|-------------------------|
| PHC-E-135        | <b><i>Laryngoscope set for PHC facilities</i></b> | No                                |                         |

|                            |                                                                                                                                                                                                                                                                                                                                                                                                                                                                                                                                                                                                                                                                                                                                        |
|----------------------------|----------------------------------------------------------------------------------------------------------------------------------------------------------------------------------------------------------------------------------------------------------------------------------------------------------------------------------------------------------------------------------------------------------------------------------------------------------------------------------------------------------------------------------------------------------------------------------------------------------------------------------------------------------------------------------------------------------------------------------------|
| Functional Specifications  | <p>Laryngoscope set handle: Handle fabricated from stainless steel. The bulb is housed in the handle head. The lamp to be of LED type. Lamp to switch on when blade is extended into operating position. Quick-release head, Batteries to be housed in handle. May have second smaller handle for paediatric blades. Spare set of batteries to be supplied.</p> <p>Blades to be supplied: The blade sizes 0, 1, straight fibre optic (Miller), and 1,2,3,4,5 curved fibre-optic(Macintosh pattern). Blades are to be manufactured from medical grade stainless steel. With hook-on fitting and positive-locking engagement to keep blade attached to handle in closed or operating position. Integrated, non-removable light path.</p> |
| Applicable Standards       | Must comply with ISO 7376:2009 (or later) or equivalent.                                                                                                                                                                                                                                                                                                                                                                                                                                                                                                                                                                                                                                                                               |
| Performance Specifications | <p>Cool white or daylight LED colour temperature.</p> <p>Handle must have non-slip surface or knurling.</p> <p>Expected service life: 15 years.</p>                                                                                                                                                                                                                                                                                                                                                                                                                                                                                                                                                                                    |
| Accessories                | <p>To be supplied in a plastic container with closure. Spare bulb to be supplied, with instructions for replacement.</p> <p>Spare set of batteries.</p>                                                                                                                                                                                                                                                                                                                                                                                                                                                                                                                                                                                |
| Warranties                 | 5-year guarantee on handles, blades, hook-on mechanism and switches. At least 2-year guarantee on light source.                                                                                                                                                                                                                                                                                                                                                                                                                                                                                                                                                                                                                        |
| Instructions to Suppliers  | Supplier to provide a list of accessories and parts for the laryngoscope, with pricing. Supplier to include a price for an optional. Paediatric handle, if not included with the set. Supplier is also to offer a sheet of high-density closed-cell foam with cut-outs for the handle, blades and spare bulbs, to be fitted inside a drawer of the crash cart trolley.                                                                                                                                                                                                                                                                                                                                                                 |
| Note to Procurement        | There is a similar set available as RT 4-05-040 ME, but it does not have the blade selection required. This shortcoming must be addressed in the next tender.                                                                                                                                                                                                                                                                                                                                                                                                                                                                                                                                                                          |

| Catalogue Number | Item Name                                                                   | Available on Transversal Contract | Contract Number or Code |
|------------------|-----------------------------------------------------------------------------|-----------------------------------|-------------------------|
| PHC-E-136        | <b><i>Monitor: multifunction vital signs, including SpO<sub>2</sub></i></b> | RT 4-2015                         | RT 4-05-030 ME          |

## Functional Specifications

The unit will automatically acquire and display vital measurements once switched on and connected to the patient. Data acquisition will continue at pre-set intervals, until switched off. A transport-type unit is envisaged.

Given the operational environment, the smallest number of controls is preferred.

Although not mandatory, external communication port would be an advantage – could be optional (USB or RJ).

Power-on self-test.

The interval between measurements must be selectable from 1 – 120 minutes.

Must be compatible with Automatic External Defibrillator.

Unit should have optional module to measure temperature, or alternative model incorporating temperature measurement should be proposed. Temperature in degrees Centigrade, state range.

Must be suitable for adults, children and neonates.

Reusable cuffs must be supplied: Large adult, adult, paediatric, neonatal. Cuffs and cuff covers must be washable, disinfectable. Minimum cuff tube length 1,5m.

The unit must use the oscillometric method of measurement.

Modes: Manual/stat and automatic.

SpO<sub>2</sub> sensor:

Sensor: Dual LED, Infra-red/visible red, which does not heat the point of application to the patient.

The following reusable sensors with cable and plug must be provided:

Finger sensor for adults

Finger sensor for children

Earlobe sensor for adults

Earlobe sensor for children

The sensor lead must be approximately 3 metres long.

LCD display:

The display must offer clear viewing under all lighting conditions.

The following must be displayed:

Systolic, diastolic and mean arterial pressures (numeric)

Oxygen saturation (SpO<sub>2</sub> %)

|                            |                                                                                                                                                                                                                                                                                                                                                                                                                                                                                                                                                                                                                                                                                                                                                                                                                                                                                                                                                                                                                                                                                                                                                                                                                                                                                                                                                                                                                                                                                                                                                                                                                        |
|----------------------------|------------------------------------------------------------------------------------------------------------------------------------------------------------------------------------------------------------------------------------------------------------------------------------------------------------------------------------------------------------------------------------------------------------------------------------------------------------------------------------------------------------------------------------------------------------------------------------------------------------------------------------------------------------------------------------------------------------------------------------------------------------------------------------------------------------------------------------------------------------------------------------------------------------------------------------------------------------------------------------------------------------------------------------------------------------------------------------------------------------------------------------------------------------------------------------------------------------------------------------------------------------------------------------------------------------------------------------------------------------------------------------------------------------------------------------------------------------------------------------------------------------------------------------------------------------------------------------------------------------------------|
| Applicable Standards       | <p>Measurement accuracy must have been clinically validated (AASI/AAMI SP10-2002, BHS protocol, or ESH protocol). <b>Proof to be submitted, preferably peer-reviewed published report.</b> Unpublished independent clinical validation study may be accepted in absence of peer-reviewed published report. Minimum is in-house clinical validation study and report.</p> <p>Evidence of measurement repeatability required (SD&lt;1mm Hg from 30 consecutive measurements of 120/80mm Hg).</p> <p>Must comply with latest version of EN 1060-4, EN 1060-3 with Amendment A1:2005.</p>                                                                                                                                                                                                                                                                                                                                                                                                                                                                                                                                                                                                                                                                                                                                                                                                                                                                                                                                                                                                                                  |
| Performance Specifications | <p>State whether measurements are performed on inflation or deflation part of cycle.</p> <p>State BP measurement algorithm.</p> <p>Pressure measurements:</p> <p><b>Adult:</b> Systolic: 30 – 270mm Hg, <b>Diastolic:</b> 20-240mm Hg, MAP: 20 – 250mm Hg</p> <p><b>Paediatric:</b> Systolic: 30 – 160mm Hg, <b>Diastolic:</b> 20-120, MAP: 20 – 120mm Hg</p> <p><b>Neonate:</b> Systolic: 30 – 130mm Hg, <b>Diastolic:</b> 20-100mm Hg, MAP: 20 – 120mm Hg</p> <p><b>Heart rate:</b> 30 – 240 min. Indication of pulse irregularity desirable.</p> <p>Unit should have optional module to measure temperature, or alternative model incorporating temperature measurement should be proposed. Temperature in degrees Centigrade, state range.</p> <p><b>Pulse oximeter.</b></p> <p>State SpO<sub>2</sub> measurement method.</p> <p>Suitable for adult, paediatric and neonatal use.</p> <p>The unit must continuously measure and display SpO<sub>2</sub> % .</p> <p>Oxygen saturation (SpO<sub>2</sub> %): Range of measurement: 0-100%.</p> <p>The accuracy must be better than 2,5 % (70-100%) and 5% (50-70%).</p> <p>Pulse rate (beats/min): Range of measurement: 20-300 bpm.</p> <p>The pulse rate accuracy must be better than <math>\pm 2</math> %.</p> <p>An audible bleep should sound for each heartbeat, the pitch of which should vary with the oxygen saturation.</p> <p>Automatic rejection of motion artefacts.</p> <p>Must be protected against electrosurgical and defibrillation voltages.</p> <p>The unit must have trending for at least 72 hours.</p> <p>Expected service life: 10 years.</p> |
| Accessories                | <p>Must be supplied with all patient cables (incl. at least three-lead ECG cable), SpO<sub>2</sub> sensors, power cable at least 3m long with standard South African 3-pin plug, user manual.</p>                                                                                                                                                                                                                                                                                                                                                                                                                                                                                                                                                                                                                                                                                                                                                                                                                                                                                                                                                                                                                                                                                                                                                                                                                                                                                                                                                                                                                      |
| Warranties                 | <p>3-year guarantee on all parts (including cuffs and cuff covers) except battery. Specify expected battery life under 8 hour continual operations, daily cycling. Guarantee to include calibration.</p>                                                                                                                                                                                                                                                                                                                                                                                                                                                                                                                                                                                                                                                                                                                                                                                                                                                                                                                                                                                                                                                                                                                                                                                                                                                                                                                                                                                                               |

|                           |                                                                                                                                                                                                                                                                                                                                                                                                                                                                                                                                                                                                                                                                                                                                                                                                                                                                                                                                                                                                                                                                                                                                                                      |
|---------------------------|----------------------------------------------------------------------------------------------------------------------------------------------------------------------------------------------------------------------------------------------------------------------------------------------------------------------------------------------------------------------------------------------------------------------------------------------------------------------------------------------------------------------------------------------------------------------------------------------------------------------------------------------------------------------------------------------------------------------------------------------------------------------------------------------------------------------------------------------------------------------------------------------------------------------------------------------------------------------------------------------------------------------------------------------------------------------------------------------------------------------------------------------------------------------|
| Instructions to Suppliers | <p>If unit has an optional module for ECG recording (or if there is a separate model which includes this capability, supplier to provide comprehensive technical specifications, pricing, and pricing of any patient cables, consumables and replaceable parts.</p> <p>Supplier to deliver, commission and train users.</p> <p>Supplier to stipulate any costs associated with service over the guarantee period, and whether a service plan is available (specify price).</p> <p>Supplier to stipulate recommended recalibration intervals.</p> <p>Cuffs and covers must be cleanable and disinfectable. Indicate whether sterilisable, preferred method, and number of cycles.</p> <p>Supplier to state Mean Time Before Failure for Unit and any parts which may have different MTBF.</p> <p>Supplier must supply certificate issued by Directorate of Radiation Control of the Department of Health, in terms of the Hazardous Substances Act (Act 15 of 1973).</p> <p>Supplier must specify available after-sales support, with relevant pricing.</p>                                                                                                           |
| Note to Procurement       | <p>These specifications exceed those of RT 4-05-030 ME, and should be used for future procurements.</p> <p>The following items must be in series with this instrument:</p> <ul style="list-style-type: none"> <li>Thigh cuff</li> <li>Large adult cuff</li> <li>Adult cuff</li> <li>Paediatric cuff</li> <li>Neonatal cuff</li> <li>Air hose</li> <li>Battery</li> <li>Finger sensor for adults</li> <li>Finger sensor for children</li> <li>Earlobe sensor for adults</li> <li>Earlobe sensor for children</li> <li>Disposable sensors for adults, pack of ten</li> <li>Disposable sensors for children, pack of ten</li> <li>Sensor for neonates</li> <li>Replaceable main board (if user- serviceable)</li> <li>Temperature sensor if disposable, quote price per 100)</li> <li>Optional wall-mounting bracket</li> <li>Optional pole-mounting fixture</li> <li>Optional mounting to instrument rail (built-in hanging hooks not suitable)</li> <li>Optional bracket to fix unit to a table top</li> <li>Optional mobile stand on 5-star base with non-marking castors (SABS 601)</li> <li>Optional cradle for cuff when not in use (wall/pole/stand).</li> </ul> |

| Catalogue Number | Item Name        | Available on Transversal Contract | Contract Number or Code |
|------------------|------------------|-----------------------------------|-------------------------|
| PHC-E-137        | <b>Nebuliser</b> | No                                |                         |

|                            |                                                                                                                                                                                                                                                                                                                                                                                                                                                                                                                                                                                                                                                                                                      |
|----------------------------|------------------------------------------------------------------------------------------------------------------------------------------------------------------------------------------------------------------------------------------------------------------------------------------------------------------------------------------------------------------------------------------------------------------------------------------------------------------------------------------------------------------------------------------------------------------------------------------------------------------------------------------------------------------------------------------------------|
| Functional Specifications  | <p><b>General specifications:</b> The unit must be a portable, lightweight unit of approximately 2-3kg. Ultrasonic. Should be able to connect directly to a mask. Unit to be cleanable by either boiling (5-10mins) or with a chemical disinfectant or sterilisable in autoclave at 121°C (1,2bar). Unit to include power switch to activate blower and transducer, flow rate adjustment controller. Unit to have external air inlet with replaceable high efficiency filter (50/70um). Unit to have a low operating sound level (max 60dB). Time-out function 0-60 minutes.</p> <p><b>Power requirements</b> Mains voltage: 220V, 50-60Hz. The unit to be supplied complete with 3m power cord.</p> |
| Applicable Standards       | <p>ISO 27427:2013.</p> <p>Supplier must provide certificate issued by Directorate of Radiation Control of the Department of Health, in terms of the Hazardous Substances Act (Act 15 of 1973).</p>                                                                                                                                                                                                                                                                                                                                                                                                                                                                                                   |
| Performance Specifications | <p>Unit to operate with maximum pressure of 1,6 bar approximately.</p> <p>Unit to have a nebulisation capacity of 2-5 ml per minute. Medicine chamber capacity 50-100ml. Particle size 3-8 micron.</p> <p>Must be cleanable with standard cleaning and disinfectant solutions.</p> <p>State expected Mean Time Before Failure of the unit.</p> <p>Expected service life: 10 years.</p>                                                                                                                                                                                                                                                                                                               |
| Accessories                | None.                                                                                                                                                                                                                                                                                                                                                                                                                                                                                                                                                                                                                                                                                                |
| Warranties                 | 3 years.                                                                                                                                                                                                                                                                                                                                                                                                                                                                                                                                                                                                                                                                                             |
| Instructions to Suppliers  | <p>All necessary documentation and operating/service manuals in English to be included in tender price. Supplier to list consumable and replacement items with relevant prices for these.</p> <p>Supplier to indicate availability of after-sales support, with relevant pricing. Details of recommended service and service intervals to be clearly stated.</p>                                                                                                                                                                                                                                                                                                                                     |
| Note to Procurement        |                                                                                                                                                                                                                                                                                                                                                                                                                                                                                                                                                                                                                                                                                                      |

| Catalogue Number | Item Name                                      | Available on Transversal Contract | Contract Number or Code |
|------------------|------------------------------------------------|-----------------------------------|-------------------------|
| PHC-E-138        | <b><i>Oxygen regulator with flow-meter</i></b> | No                                |                         |

|                            |                                                                                                                                                                                                                                                                                                                                                                                                                                                               |
|----------------------------|---------------------------------------------------------------------------------------------------------------------------------------------------------------------------------------------------------------------------------------------------------------------------------------------------------------------------------------------------------------------------------------------------------------------------------------------------------------|
| Functional Specifications  | <p>A medical gas regulator incorporating a flow meter. To incorporate a safety pressure relief valve. Regulator body to be manufactured from non-corrosive metal.</p> <p>The flow meter and flow adjustment knob to be manufactured from an impact resistant plastic (polycarbonate).</p> <p>High visibility flow indicator.</p> <p>Bullnose fitting.</p> <p>Nipple for direct connection of oxygen masks or tubing.</p>                                      |
| Applicable Standards       | None.                                                                                                                                                                                                                                                                                                                                                                                                                                                         |
| Performance Specifications | <p>Flow meter to be graduated from 1 to 15l per minute.</p> <p>Must be cleanable with standard cleaning and disinfectant solutions.</p> <p>Expected service life: 15 years.</p>                                                                                                                                                                                                                                                                               |
| Accessories                |                                                                                                                                                                                                                                                                                                                                                                                                                                                               |
| Warranties                 | 5 years on needle valve, 10-year guarantee on valve body and flowmeter.                                                                                                                                                                                                                                                                                                                                                                                       |
| Instructions to Suppliers  | None.                                                                                                                                                                                                                                                                                                                                                                                                                                                         |
| Note to Procurement        | <p>The bullnose regulator in RT 4 has been discontinued. A replacement needs to be found for use with larger oxygen cylinders.</p> <p>These specifications differ from those for RT 4-05-035 ME, and should be considered for future procurements. The dial-type flowmeters requested in RT 4 have proven to be too fragile for our operating environment.</p> <p>As flowmeters tend to get damaged, spare flowmeters should be in series with this item.</p> |

| Catalogue Number | Item Name                                | Available on Transversal Contract | Contract Number or Code |
|------------------|------------------------------------------|-----------------------------------|-------------------------|
| PHC-E-140        | <b><i>Infant manual resuscitator</i></b> | RT 4                              | RT 4-05-026 ME          |

|                            |                                                                                                                                                                                                                                                                                                                                                                                                                                                                                                                                                                                                                                                                                                                                                                                                                                                                                                                                                                                                                                         |
|----------------------------|-----------------------------------------------------------------------------------------------------------------------------------------------------------------------------------------------------------------------------------------------------------------------------------------------------------------------------------------------------------------------------------------------------------------------------------------------------------------------------------------------------------------------------------------------------------------------------------------------------------------------------------------------------------------------------------------------------------------------------------------------------------------------------------------------------------------------------------------------------------------------------------------------------------------------------------------------------------------------------------------------------------------------------------------|
| Functional Specifications  | <p>Usage for premature neonates and infants 0kg to 4kg.</p> <p>Shall allow for single-handed operation.</p> <p>Bag capable of rapid and full re-expansion.</p> <p>Swivel connector present to allow for changing angle of operation.</p> <p>Function not affected by extremes temperatures.</p> <p>Allow for oxygen inlet via oxygen tubing.</p> <p>Face mask shall be clear and provide a leak proof seal. Mask sizes 00,0 and 1 to be supplied with each item.</p> <p>Compatible valve fitting to standard external PEEP fitting W/POP-OFF minimum 40cm H2O.</p> <p>Non-disposable silicone or PVC.</p> <p>Shall have a reservoir bag. (Minimum 600ml).</p> <p>Must be supplied in a soft carrying case made of durable, washable material with appropriate carrying straps.</p> <p><b>Physical characteristics:</b></p> <p>May be stored in any configuration without losing its shape and / or functional capability.</p> <p><b>Documentation:</b></p> <p>A set of operating manuals shall be supplied in the English language.</p> |
| Applicable Standards       | ISO 10651-4 (2013).                                                                                                                                                                                                                                                                                                                                                                                                                                                                                                                                                                                                                                                                                                                                                                                                                                                                                                                                                                                                                     |
| Performance Specifications | <p>Maximum bag volume of 280ml.</p> <p>Maximum tidal volume of 150ml.</p>                                                                                                                                                                                                                                                                                                                                                                                                                                                                                                                                                                                                                                                                                                                                                                                                                                                                                                                                                               |
| Accessories                | Must be supplied in a soft carrying case made of durable, washable material with appropriate carrying straps.                                                                                                                                                                                                                                                                                                                                                                                                                                                                                                                                                                                                                                                                                                                                                                                                                                                                                                                           |
| Warranties                 | 2 years.                                                                                                                                                                                                                                                                                                                                                                                                                                                                                                                                                                                                                                                                                                                                                                                                                                                                                                                                                                                                                                |
| Instructions to Suppliers  |                                                                                                                                                                                                                                                                                                                                                                                                                                                                                                                                                                                                                                                                                                                                                                                                                                                                                                                                                                                                                                         |
| Note to Procurement        | Must run as series with Child and Adult manual Resuscitators, And PEEP valve.                                                                                                                                                                                                                                                                                                                                                                                                                                                                                                                                                                                                                                                                                                                                                                                                                                                                                                                                                           |

| Catalogue Number | Item Name                               | Available on Transversal Contract | Contract Number or Code |
|------------------|-----------------------------------------|-----------------------------------|-------------------------|
| PHC-E-141        | <b><i>Child manual resuscitator</i></b> | RT 4                              | RT 4-05-025 ME          |

|                            |                                                                                                                                                                                                                                                                                                                                                                                                                                                                                                                                                                                                                                                                                                                                                                                                                                                                                                                                                   |
|----------------------------|---------------------------------------------------------------------------------------------------------------------------------------------------------------------------------------------------------------------------------------------------------------------------------------------------------------------------------------------------------------------------------------------------------------------------------------------------------------------------------------------------------------------------------------------------------------------------------------------------------------------------------------------------------------------------------------------------------------------------------------------------------------------------------------------------------------------------------------------------------------------------------------------------------------------------------------------------|
| Functional Specifications  | <p>Usage for children.</p> <p>Shall allow for single-handed operation.</p> <p>Bag capable of rapid and full re-expansion.</p> <p>Swivel connector present to allow for changing angle of operation.</p> <p>Function not affected by extremes temperatures.</p> <p>Allow for oxygen inlet via oxygen tubing.</p> <p>Cuffed mask shall be clear and provide a leak proof seal.</p> <p>Compatible valve fitting to standard external PEEP fitting W/POP-OFF minimum 30cm H2O.</p> <p>Non-disposable silicone or PVC.</p> <p>Shall have a reservoir bag. (Minimum 600ml).</p> <p>Must be supplied in a soft carrying case made of durable, washable material with appropriate carrying straps.</p> <p><b>Physical characteristics:</b></p> <p>May be stored in any configuration without losing its shape and/or functional capability.</p> <p><b>Documentation:</b></p> <p>A set of operating manuals shall be supplied in the English language.</p> |
| Applicable Standards       | ISO 10651-4 (2013).                                                                                                                                                                                                                                                                                                                                                                                                                                                                                                                                                                                                                                                                                                                                                                                                                                                                                                                               |
| Performance Specifications | <p>Maximum bag volume of 500ml.</p> <p>Maximum tidal volume of 350ml.</p>                                                                                                                                                                                                                                                                                                                                                                                                                                                                                                                                                                                                                                                                                                                                                                                                                                                                         |
| Accessories                | <p>Mask sizes 1,2 and 3 to be supplied with each item.</p> <p>Must be supplied in a soft carrying case made of durable, washable material with appropriate carrying straps.</p>                                                                                                                                                                                                                                                                                                                                                                                                                                                                                                                                                                                                                                                                                                                                                                   |
| Warranties                 | 2 years.                                                                                                                                                                                                                                                                                                                                                                                                                                                                                                                                                                                                                                                                                                                                                                                                                                                                                                                                          |
| Instructions to Suppliers  |                                                                                                                                                                                                                                                                                                                                                                                                                                                                                                                                                                                                                                                                                                                                                                                                                                                                                                                                                   |
| Note to Procurement        | Must run as series with Infant and Adult Manual Resuscitators, and PEEP valve.                                                                                                                                                                                                                                                                                                                                                                                                                                                                                                                                                                                                                                                                                                                                                                                                                                                                    |



| Catalogue Number | Item Name                        | Available on Transversal Contract | Contract Number or Code |
|------------------|----------------------------------|-----------------------------------|-------------------------|
| PHC-E-142        | <b>Adult manual resuscitator</b> | RT 4                              | RT 4-05-024 ME          |

|                            |                                                                                                                                                                                                                                                                                                                                                                                                                                                                                                                                                                                                                                                                                                                                                                                                                                                                                                                                                                                                                                                                                                                                     |
|----------------------------|-------------------------------------------------------------------------------------------------------------------------------------------------------------------------------------------------------------------------------------------------------------------------------------------------------------------------------------------------------------------------------------------------------------------------------------------------------------------------------------------------------------------------------------------------------------------------------------------------------------------------------------------------------------------------------------------------------------------------------------------------------------------------------------------------------------------------------------------------------------------------------------------------------------------------------------------------------------------------------------------------------------------------------------------------------------------------------------------------------------------------------------|
| Functional Specifications  | <p>Usage for adults.</p> <p>Shall allow for single-handed operation.</p> <p>Bag capable of rapid and full re-expansion.</p> <p>Swivel connector present to allow for changing angle of operation, with standard 22mm outer diameter and 15mm internal diameter fittings.</p> <p>Function not affected by extremes temperatures.</p> <p>Allow for oxygen inlet via oxygen tubing.</p> <p>Cuffed mask shall be clear and provide a leak proof seal.</p> <p>Compatible valve fitting to standard external PEEP fitting W/POP-OFF minimum 60cm H2O.</p> <p>Non-disposable silicone or PVC.</p> <p>Shall have a reservoir bag. (Minimum 600ml).</p> <p>Must be supplied in a soft carrying case made of durable, washable material with appropriate carrying straps.</p> <p><b>Physical characteristics:</b></p> <p>Compatible with all methods of sterilisation and disinfection. Bag should be autoclaveable to 134 °C.</p> <p>May be stored in any configuration without losing its shape and/or functional capability.</p> <p><b>Documentation:</b></p> <p>A set of operating manuals shall be supplied in the English language.</p> |
| Applicable Standards       | ISO 10651-4 (2013).                                                                                                                                                                                                                                                                                                                                                                                                                                                                                                                                                                                                                                                                                                                                                                                                                                                                                                                                                                                                                                                                                                                 |
| Performance Specifications | <p>Maximum bag volume of 1500ml.</p> <p>Maximum tidal volume of 1000ml.</p>                                                                                                                                                                                                                                                                                                                                                                                                                                                                                                                                                                                                                                                                                                                                                                                                                                                                                                                                                                                                                                                         |
| Accessories                | <p>Mask sizes 4 and 5 to be supplied with each item.</p> <p>Must be supplied in a soft carrying case made of durable, washable material with appropriate carrying straps.</p>                                                                                                                                                                                                                                                                                                                                                                                                                                                                                                                                                                                                                                                                                                                                                                                                                                                                                                                                                       |
| Warranties                 |                                                                                                                                                                                                                                                                                                                                                                                                                                                                                                                                                                                                                                                                                                                                                                                                                                                                                                                                                                                                                                                                                                                                     |
| Instructions to Suppliers  |                                                                                                                                                                                                                                                                                                                                                                                                                                                                                                                                                                                                                                                                                                                                                                                                                                                                                                                                                                                                                                                                                                                                     |
| Note to Procurement        | Must run as series with Infant and Child Manual Resuscitators, and PEEP valve.                                                                                                                                                                                                                                                                                                                                                                                                                                                                                                                                                                                                                                                                                                                                                                                                                                                                                                                                                                                                                                                      |

| Catalogue Number | Item Name         | Available on Transversal Contract | Contract Number or Code |
|------------------|-------------------|-----------------------------------|-------------------------|
| PHC-E-143        | <b>PEEP valve</b> | RT 4-2015                         | RT 4-05-027 ME          |

|                            |                                                                                                                                                 |
|----------------------------|-------------------------------------------------------------------------------------------------------------------------------------------------|
| Functional Specifications  | Clear plastic.<br>Autoclaveable.                                                                                                                |
| Applicable Standards       | ISO 10651-4 (2013).                                                                                                                             |
| Performance Specifications | Pressure adjustable from 5-20c. of H <sub>2</sub> O.<br>Must be cleanable with standard cleaning and disinfectant solutions. And autoclaveable. |
| Accessories                | Must include one adult and one paediatric re-usable probes.                                                                                     |
| Warranties                 | 2-year warranty.                                                                                                                                |
| Instructions to Suppliers  | None.                                                                                                                                           |
| Note to Procurement        | Must be in series with RT 4-05-026 ME, RT 4-05-025 ME, RT 4-05-024 ME.                                                                          |

| Catalogue Number | Item Name                                   | Available on Transversal Contract | Contract Number or Code |
|------------------|---------------------------------------------|-----------------------------------|-------------------------|
| PHC-E-146        | <b><i>Suction machine:<br/>portable</i></b> | RT 4                              | RT 4-05-041 ME          |

|                            |                                                                                                                                                                                                                                                                                                                                                                                                                                                                                                                                                                                                                                                                                                                                                                                                                                                                                                                                                                                                                                                                                                                                                                                                                                                                                                                                                                             |
|----------------------------|-----------------------------------------------------------------------------------------------------------------------------------------------------------------------------------------------------------------------------------------------------------------------------------------------------------------------------------------------------------------------------------------------------------------------------------------------------------------------------------------------------------------------------------------------------------------------------------------------------------------------------------------------------------------------------------------------------------------------------------------------------------------------------------------------------------------------------------------------------------------------------------------------------------------------------------------------------------------------------------------------------------------------------------------------------------------------------------------------------------------------------------------------------------------------------------------------------------------------------------------------------------------------------------------------------------------------------------------------------------------------------|
| Functional Specifications  | <p>Unit must be self-contained in use, and easily carried by hand.</p> <p>Must contain a rechargeable battery (non-memory forming) with built-in or external charger.</p> <p>The gauge must be marked in kPa and mmHg.</p> <p>Must have a battery charge level indicator.</p> <p>On-off switch must be illuminated and have a splash-proof cover.</p> <p>Must have suction control for accurate regulation of the vacuum.</p> <p>One receiver jar of 2l capacity, graduated in 100ml steps.</p> <p>Receiver jar must be high impact crack resistant polycarbonate.</p> <p>Receiver jar and lid must be removable and autoclavable.</p> <p>Receiver jar lid must have overflow protection.</p> <p>Receiver jar must operate without liners.</p> <p>Vacuum pump regulator must be fitted with a hydrophobic bacterial filter to prevent aspirated fluid from entering the suction pump.</p> <p>The suction inlets and connectors must be stainless steel.</p> <p>The pump must be oil free and maintenance free.</p> <p>The unit must operate from a 220 V AC supply.</p> <p>Must have a mains cable at least 3m long fitted with a SABS approved three pin 15A plug.</p> <p>Battery status indicator.</p> <p>Battery capacity: at least 1 hour operation.</p> <p>Battery must be sealed, maintenance free.</p> <p>The suction unit must be easy to service and maintain.</p> |
| Applicable Standards       | ISO 10079-1:2015.                                                                                                                                                                                                                                                                                                                                                                                                                                                                                                                                                                                                                                                                                                                                                                                                                                                                                                                                                                                                                                                                                                                                                                                                                                                                                                                                                           |
| Performance Specifications | <p>Vacuum pressure minimum 75mmHG and adjustable up to 150mmHG.</p> <p>The suction capacity must be at least 25l per minute.</p> <p>Working noise less than 50 dB.</p>                                                                                                                                                                                                                                                                                                                                                                                                                                                                                                                                                                                                                                                                                                                                                                                                                                                                                                                                                                                                                                                                                                                                                                                                      |
| Accessories                | <p>Supplied with re-usable, autoclaveable suction tube and cannula.</p> <p>Filter: antibacterial PHC-C-162.</p>                                                                                                                                                                                                                                                                                                                                                                                                                                                                                                                                                                                                                                                                                                                                                                                                                                                                                                                                                                                                                                                                                                                                                                                                                                                             |

|                           |                                                                                                                                                                                                                                                                                                                                                                                                                                                                                                                                       |
|---------------------------|---------------------------------------------------------------------------------------------------------------------------------------------------------------------------------------------------------------------------------------------------------------------------------------------------------------------------------------------------------------------------------------------------------------------------------------------------------------------------------------------------------------------------------------|
| Warranties                | 2 years.                                                                                                                                                                                                                                                                                                                                                                                                                                                                                                                              |
| Instructions to Suppliers | <p>List ALL available consumables with prices incl VAT.</p> <p>List ALL available accessories with prices incl VAT.</p> <p>The unit must be handed over in full operating order.</p> <p>A starter-pack of consumables must be supplied with the unit.</p> <p>Specify any mandatory service required, to keep unit at optimal operating condition.</p>                                                                                                                                                                                 |
| Note to Procurement       | <p>Hydrophobic bacterial filters, must be in series with this item.</p> <p>In this and any future procurement, preference should be given to machines which have reusable autoclave able suction hoses and cannulas, to minimise logistical requirements.</p> <p>Two sets of such re-usable suction hoses and cannula should be ordered, so that one is always available.</p> <p>Under this particular contract RT 4, the machine offered has a 1l jar. However, the supplier should be requested to supply 2 jars of 2l instead.</p> |

| Catalogue Number | Item Name                           | Available on Transversal Contract | Contract Number or Code |
|------------------|-------------------------------------|-----------------------------------|-------------------------|
| PHC-E-144        | <b><i>Suction: trolley-type</i></b> | RT 2-2016                         | 42171801-00001          |

|                           |                                                                                                                                                                                                                                                                                                                                                                                                                                                                                                                                                                                                                                                                                                                                                                                                                                                                                                                                                                                                                                                                                                                                                                                                                                                                                                                                                                                                                                                                                                                                                                                                                                                                                                             |
|---------------------------|-------------------------------------------------------------------------------------------------------------------------------------------------------------------------------------------------------------------------------------------------------------------------------------------------------------------------------------------------------------------------------------------------------------------------------------------------------------------------------------------------------------------------------------------------------------------------------------------------------------------------------------------------------------------------------------------------------------------------------------------------------------------------------------------------------------------------------------------------------------------------------------------------------------------------------------------------------------------------------------------------------------------------------------------------------------------------------------------------------------------------------------------------------------------------------------------------------------------------------------------------------------------------------------------------------------------------------------------------------------------------------------------------------------------------------------------------------------------------------------------------------------------------------------------------------------------------------------------------------------------------------------------------------------------------------------------------------------|
| Functional Specifications | <p>Unit must be mounted on mobile stand with at least 4 x castor wheels.</p> <p>Must contain a rechargeable battery with built-in charger.</p> <p>Two of the castors must be lockable.</p> <p>Operating pressure: 0 to -80 kPa.</p> <p>The gauge must be marked in kPa and mmHg.</p> <p>The gauge must be fully removable for maintenance.</p> <p>On-off switch must be illuminated and have a splash-proof cover.</p> <p>Must have suction control for accurate regulation of the vacuum.</p> <p>Two receiver jars, each of 2l capacity, graduated in 100 ml steps.</p> <p>Receiver jars must be high impact crack resistant polycarbonate.</p> <p>Receiver jars and lids must be removable and autoclavable.</p> <p>Receiver jar lid must have overflow protection.</p> <p>Receiver jar must operate with and without liners.</p> <p>Vacuum pump regulator must be fitted with a hydrophobic bacterial filter to prevent aspirated fluid from entering the suction pump.</p> <p>The suction inlets and connectors must be stainless steel.</p> <p>The pump must be oil free and maintenance free.</p> <p>The vacuum regulator must be fitted with a probe of the S.A.B.S./Heyer type.</p> <p>The mobile stand must have a handle for pushing.</p> <p>The unit must operate from a 220 V AC supply.</p> <p>Must have a mains cable at least 3 m long fitted with a SABS approved three pin 15A plug.</p> <p>Battery status indicator.</p> <p>Battery capacity: at least 1 hour operation.</p> <p>Battery must be sealed, maintenance free.</p> <p>The unit must meet the appropriate ISO standards.</p> <p>The unit must be CE approved.</p> <p>The suction unit must be easy to service and maintain.</p> |
| Applicable Standards      | ISO 10079-1:2015.                                                                                                                                                                                                                                                                                                                                                                                                                                                                                                                                                                                                                                                                                                                                                                                                                                                                                                                                                                                                                                                                                                                                                                                                                                                                                                                                                                                                                                                                                                                                                                                                                                                                                           |

|                            |                                                                                                                                                                                                                                                                                                                                                                               |
|----------------------------|-------------------------------------------------------------------------------------------------------------------------------------------------------------------------------------------------------------------------------------------------------------------------------------------------------------------------------------------------------------------------------|
| Performance Specifications | <p>The suction capacity must be at least 25l per minute.</p> <p>Working noise less than 50 dB.</p> <p>Vacuum regulator should operate on high vacuum 7 to 67 kPa and low vacuum 0 to 19 kPa.</p>                                                                                                                                                                              |
| Accessories                | <p>Supplied with re-usable, autoclaveable suction tube and cannula.</p> <p>Filter: antibacterial PHC-C-161.</p>                                                                                                                                                                                                                                                               |
| Warranties                 | <p>2 years.</p>                                                                                                                                                                                                                                                                                                                                                               |
| Instructions to Suppliers  | <p>List ALL available consumables with prices incl VAT.</p> <p>List ALL available accessories with prices incl VAT.</p> <p>The unit must be handed over in full operating order.</p> <p>A starter-pack of consumables must be supplied with the unit.</p> <p>Specify any mandatory service required, to keep unit at optimal operating condition.</p>                         |
| Note to Procurement        | <p>Hydrophobic bacterial filters, must be in series with this item.</p> <p>In this and any future procurement, preference should be given to machines which have reusable autoclave able suction hoses and cannulas, to minimise logistical requirements.</p> <p>Two sets of such re-usable suction hoses and cannula should be ordered, so that one is always available.</p> |

| Catalogue Number | Item Name                   | Available on Transversal Contract | Contract Number or Code |
|------------------|-----------------------------|-----------------------------------|-------------------------|
| PHC-E-128        | <b><i>Broselow tape</i></b> | RT 4                              | RT 4-05-010 ME          |

|                            |                                                                                                                                                                                                                                                                                                                                                                                                                                                                                                                                                                                                                                                    |
|----------------------------|----------------------------------------------------------------------------------------------------------------------------------------------------------------------------------------------------------------------------------------------------------------------------------------------------------------------------------------------------------------------------------------------------------------------------------------------------------------------------------------------------------------------------------------------------------------------------------------------------------------------------------------------------|
| Functional Specifications  | <p>Durable tape with standard length markings and colour zones.</p> <p>Each colour zone is associated with recommended dosages of resuscitation drugs and defibrillation energy for use in infants, where the weight is unknown.</p> <p>Flexible type preferred, for storage purposes. Non-smudge, non-fade. Must be cleanable with detergents and standard disinfectants. Supplier to state which cleaning solutions are unsuitable.</p> <p>Supplier to state whether the basis for the year edition of the tape (the US National Health and Nutrition Examination Survey – NHANES data) has been correlated with similar South African data.</p> |
| Applicable Standards       | None.                                                                                                                                                                                                                                                                                                                                                                                                                                                                                                                                                                                                                                              |
| Performance Specifications | Supplier to state year edition of tape. Supplier to state whether all required clinical information is printed on tape, or whether a laminated card with resuscitation algorithms is required. In the latter case, supplier to propose such a card, specifying cost.                                                                                                                                                                                                                                                                                                                                                                               |
| Accessories                | Clear plastic protective cover.                                                                                                                                                                                                                                                                                                                                                                                                                                                                                                                                                                                                                    |
| Warranties                 | None.                                                                                                                                                                                                                                                                                                                                                                                                                                                                                                                                                                                                                                              |
| Instructions to Suppliers  | State expected service life of tape under normal use.                                                                                                                                                                                                                                                                                                                                                                                                                                                                                                                                                                                              |
| Note to Procurement        | These specifications are more extensive than those in RT 4, and should be used in future procurements.                                                                                                                                                                                                                                                                                                                                                                                                                                                                                                                                             |

| Catalogue Number | Item Name                 | Available on Transversal Contract | Contract Number or Code |
|------------------|---------------------------|-----------------------------------|-------------------------|
| PHC-E-129        | <b><i>PAWPER tape</i></b> | No                                |                         |

|                            |                                                                                                                                                                                                        |
|----------------------------|--------------------------------------------------------------------------------------------------------------------------------------------------------------------------------------------------------|
| Functional Specifications  | The Pawper (Paediatric Advanced Weight Prediction in the Emergency Room) tape is a paediatric resuscitation tape validated for the South African context.<br>Dosage information is on a separate card. |
| Applicable Standards       | None.                                                                                                                                                                                                  |
| Performance Specifications | Supplier to state year edition of tape/card.                                                                                                                                                           |
| Accessories                |                                                                                                                                                                                                        |
| Warranties                 | None.                                                                                                                                                                                                  |
| Instructions to Suppliers  | State expected service life of tape under normal use.                                                                                                                                                  |
| Note to Procurement        |                                                                                                                                                                                                        |



## POINT OF CARE TESTING

| Catalogue Number | Item Name                | Available on Transversal Contract | Contract Number or Code |
|------------------|--------------------------|-----------------------------------|-------------------------|
| PHC-E-149        | <b><i>Glucometer</i></b> | No                                |                         |

|                            |                                                                                                                                                                                                                                                                                                                                                                                                                                                                                                                                                                                                                                                                                                                                                                                                                                                                                                                                                                                                                                                                                                                                                                                                                                                                                                                                                     |
|----------------------------|-----------------------------------------------------------------------------------------------------------------------------------------------------------------------------------------------------------------------------------------------------------------------------------------------------------------------------------------------------------------------------------------------------------------------------------------------------------------------------------------------------------------------------------------------------------------------------------------------------------------------------------------------------------------------------------------------------------------------------------------------------------------------------------------------------------------------------------------------------------------------------------------------------------------------------------------------------------------------------------------------------------------------------------------------------------------------------------------------------------------------------------------------------------------------------------------------------------------------------------------------------------------------------------------------------------------------------------------------------|
| Functional Specifications  | <p>Portable, handheld blood glucose monitor/meter with proven accuracy.</p> <p>Determination of glucose in fresh capillary blood, serum, venous blood and arterial blood by reflectance photometry or amperometric enzyme electrodes, making use of electronic circuitry.</p> <p>Visual back-up (comparison colour in the control window on the back of the strip with colour range on strip vial label).</p> <p>No memory loss during battery changes.</p> <p>Memory capacity- minimum of 500 measurements.</p> <p>Neonatal Clearance from FDA for test measurements.</p> <p>Weight: approximately 50grams (without batteries).</p> <p>Display: LCD with reasonable size display and visible under different lighting conditions.</p> <p>Battery operated (commonly available batteries). Must use replaceable dry cell batteries.</p> <p>Battery indicator warning for low battery.</p> <p>Operator must be able to replace batteries easily without using tools.</p> <p>On/off switch.</p> <p>Button for searching through memory (blood values).</p> <p>Insertion slot to insert test strips.</p> <p>Test strip guide with an indicator that the machine is ready to perform measurements.</p> <p>Automatic measuring of sample.</p> <p>Guarantee on shelf life of test strips irrespective of whether the pack of strips is opened or not.</p> |
| Applicable Standards       | <p>ISO: 15197:2013.</p> <p>FDA Guidance October 2016.</p>                                                                                                                                                                                                                                                                                                                                                                                                                                                                                                                                                                                                                                                                                                                                                                                                                                                                                                                                                                                                                                                                                                                                                                                                                                                                                           |
| Performance Specifications | <p>Home-use single user devices are not suitable. The device must be disinfectable to prevent blood-borne disease transmission. Specify validated disinfection procedures.</p> <p>Accuracy: 95% of all readings must be within max 15% of lab measurement (12% preferred).</p> <p>99% of measurements must be within 20% of lab measurement (15% preferred). Supply studies.</p> <p>Measuring range 0.6 -30.0 mmol per litre.</p> <p>Measuring time approximately 5 seconds.</p> <p>Automatic cut-off after <math>\pm 120</math> seconds.</p>                                                                                                                                                                                                                                                                                                                                                                                                                                                                                                                                                                                                                                                                                                                                                                                                       |

|                           |                                                                                                                                                                                                                                                     |
|---------------------------|-----------------------------------------------------------------------------------------------------------------------------------------------------------------------------------------------------------------------------------------------------|
| Accessories               | <p>One pack of glucometer test strips PHC-C-181.</p> <p>One pack of multipurpose lancets PHC-C-146.</p>                                                                                                                                             |
| Warranties                | <p>2 years on all components. Guarantee on shelf life of test strips irrespective of whether the pack of strips is opened or not.</p>                                                                                                               |
| Instructions to Suppliers | <p>After-sales service, must be available.</p> <p>Training must be supplied locally free of charge.</p>                                                                                                                                             |
| Note to Procurement       | <p>Provide for re-calibration services in procurement.</p> <p>Consumables (test strips) must be in series with this item.</p> <p>Lancets are generic to other test equipment (e.g. Haemoglobinometer, HIV test kit), and need not be in series.</p> |

| Catalogue Number | Item Name                      | Available on Transversal Contract | Contract Number or Code |
|------------------|--------------------------------|-----------------------------------|-------------------------|
| PHC-E-152        | <b><i>Haemoglobinmeter</i></b> | No                                |                         |

|                            |                                                                                                                                                                                                                                                                                                                                                                                                                                                                                                                                                                                                                                                                                                                                                                                                                                                                                                                                                                                                                                                                                                                                                                                                                                           |
|----------------------------|-------------------------------------------------------------------------------------------------------------------------------------------------------------------------------------------------------------------------------------------------------------------------------------------------------------------------------------------------------------------------------------------------------------------------------------------------------------------------------------------------------------------------------------------------------------------------------------------------------------------------------------------------------------------------------------------------------------------------------------------------------------------------------------------------------------------------------------------------------------------------------------------------------------------------------------------------------------------------------------------------------------------------------------------------------------------------------------------------------------------------------------------------------------------------------------------------------------------------------------------|
| Functional Specifications  | <p>The meter must be lightweight (approximately 300 grams), robust and simple to operate.</p> <p>Must use either replaceable dry cell batteries or rechargeable batteries.</p> <p>Specify the type and number of dry cell batteries, and expected operating time per charge. If rechargeable, state expected service life of batteries.</p> <p>If the unit has rechargeable batteries, a battery charger, operating from 220V mains supply must be provided.</p> <p>Cable for the battery charger must be at least two metres long and be fitted with a SABS approved 15A plug.</p> <p>Automatic calibration.</p> <p>The display must provide indication of a low battery condition.</p> <p>The unit must display blood haemoglobin test results in g/dl or mmol/l.</p> <p>State whether the unit on offer makes use of disposable cuvettes, or test strips (specify type).</p> <p>The meter must perform self-test/ self-calibrating on power-on. State method of self-calibration, and whether periodic user calibration is required. If so, detail method and materials required and cost thereof.</p> <p>The meter must automatically compensate for turbid blood samples and thereby still provide accurate measurement results.</p> |
| Applicable Standards       | None.                                                                                                                                                                                                                                                                                                                                                                                                                                                                                                                                                                                                                                                                                                                                                                                                                                                                                                                                                                                                                                                                                                                                                                                                                                     |
| Performance Specifications | <p>The minimum measuring range of the meter must be as follows:</p> <p>0 – 25,6g/dl</p> <p>0 – 15,9mmol/l.</p> <p>The meter must display test results within 60 seconds.</p> <p>The accuracy of the meter must be <math>\pm 1,5\%</math>.</p>                                                                                                                                                                                                                                                                                                                                                                                                                                                                                                                                                                                                                                                                                                                                                                                                                                                                                                                                                                                             |
| Accessories                | <p>Case for storage.</p> <p>Lancets, multipurpose PHC-C-146.</p> <p>Hb meter test strips PHC-C-182.</p> <p>Hb meter microcuvette PHC-C-183 (Depending on the model procured).</p>                                                                                                                                                                                                                                                                                                                                                                                                                                                                                                                                                                                                                                                                                                                                                                                                                                                                                                                                                                                                                                                         |
| Warranties                 | <p>Minimum 2-year guarantee on meter.</p> <p>Supplier to indicate expected number of examinations in average service life of meter.</p>                                                                                                                                                                                                                                                                                                                                                                                                                                                                                                                                                                                                                                                                                                                                                                                                                                                                                                                                                                                                                                                                                                   |
| Instructions to Suppliers  | <p>State frequency of recalibration by supplier if any. Such recalibration will be at no cost.</p> <p>Supplier must state the price of all consumables per 100.</p> <p>Includes delivery and group training.</p> <p>Supplier must specify available after-sales support, with relevant pricing.</p> <p>Supplier to train one person per facility.</p>                                                                                                                                                                                                                                                                                                                                                                                                                                                                                                                                                                                                                                                                                                                                                                                                                                                                                     |
| Note to Procurement        | <p>Consumables (Cuvettes or test strips) must be in series with this item.</p> <p>Provide for re-calibration services in procurement.</p>                                                                                                                                                                                                                                                                                                                                                                                                                                                                                                                                                                                                                                                                                                                                                                                                                                                                                                                                                                                                                                                                                                 |

## STERILISATION

| Catalogue Number | Item Name                         | Available on Transversal Contract | Contract Number or Code |
|------------------|-----------------------------------|-----------------------------------|-------------------------|
| PHC-E-157        | <b><i>Autoclave: tabletop</i></b> | No                                |                         |

The Class B tabletop autoclave must be suitable for a larger clinic or Community Health Centre. Floor-standing model on castors will be acceptable.

The autoclave must use steam sterilisation.

The autoclave must be fully automatic.

The chamber must be 316 stainless steel. A certificate from the OEM to be attached.

Chamber volume: 40-80l.

The working depth must be at least 400 mm.

Describe the chamber capacity in terms of DIN-StU standard system trays/baskets.

The unit must operate from a standard 220V 50Hz single phase supply. The unit must have a (minimum). 2-metre power cable, with a SABS approved 3-pin 15-amp plug top.

Electric steam generator to be incorporated.

Heating element must be isolated from the water.

Programmable Logic Controller must control all system functions and monitor system operations.

User-friendly operating instructions and procedures.

All text displays must be in English.

The control software must automatically generate information alerts (service intervals, maintenance etc.).

Pressure gauge to monitor chamber pressure.

The following parameters must be displayed during the operation of any programme:

- Chamber temperature
- Chamber pressure
- Steam generator temperature
- Steam generator pressure
- Vacuum indicator
- Operating programme
- Phase of operation

The controls must be steam and moisture proof.

The autoclave must be able to sterilize the following:

- unwrapped solid and hollow instruments
- pouched solid and hollow instruments
- single wrapped solid and hollow instruments
- double wrapped solid and hollow instruments
- porous items
- prion cycle.

Temperature alarms for all cycles at +1°C.

A Bowie & Dick test cycle must be available.

Leak test facility must be available.

Internal edges and corners to be rounded for effective cleaning.

Internal floor must slope to drain.

Removable stainless steel/brass strainer to prevent drain blockage.

All valves to be stainless steel/brass.

Valves: electric solenoid type.

## Functional Specifications

Automatic lock on door when a programme starts.

It must not be possible to pressurize the chamber if the door is not fully closed.

Safety interlock must prevent the door opening, until the chamber is at atmospheric pressure.

Door seal must be replaceable.

Visual and audible alarms for cycle malfunctions.

Self-diagnostic system with the following warnings:

- Vacuum period exceeded
- Steam discharge period exceeded
- Door lock failure
- Pressure failure
- Temperature failure
- Heater failure
- Air detector failure
- Vacuum leakage
- Door gasket failure
- Power failure
- Low chamber steam pressure
- High chamber steam pressure
- High chamber temperature
- No water alarm
- Low water alarm
- Temperature & pressure sensor failure
- Phase time-outs
- Door not properly closed
- Continuous self-checking of all safety devices.

Air removal by vacuum pulse.

Describe type of vacuum pump, and maximum negative pressure.

Describe details of water connection. Filter incorporated or external? De-ionised water necessary?

Thermal insulation must completely surround the chamber.

Chamber must withstand at least 250 kPa overpressure and vacuum.

Water quality sensor.

HEPA Air filter, easily replaceable. Efficiency greater than 99.9% for particles greater than 0.3 µm.

Overpressure valve and all other safety valves must vent into a safe area, and not into working area.

Operator controls must be by touch-type, and not switches, for infection control purposes.

The heating element must be protected by means of an overheat cut off switch.

Describe air venting method and requirements.

The unit must store data for at least the last 20 cycles. This data must be available in a printable and downloadable format. The data required is:

- Type of cycle
- Date and time
- Total time for the plateau (Sterilising)
- Temperature at the plateau (Sterilising)
- Pressure at peak plateau temperature
- Indication if a cycle has passed or failed (On printout and downloadable).

USB port for data download. Ethernet port will be accepted.

Optional Printer to print vital sterilizer data.

|                            |                                                                                                                                                                                                                                                                                                                                                                                                                                                                                                                                                                                                                                                                                                                                                                                                                                |
|----------------------------|--------------------------------------------------------------------------------------------------------------------------------------------------------------------------------------------------------------------------------------------------------------------------------------------------------------------------------------------------------------------------------------------------------------------------------------------------------------------------------------------------------------------------------------------------------------------------------------------------------------------------------------------------------------------------------------------------------------------------------------------------------------------------------------------------------------------------------|
| Applicable Standards       | <p>The autoclave must conform to the following standards. Relevant certificates must be provided: (certificates for equivalent standards may be provided)</p> <p>High pressure high vacuum steam sterilisers: SANS 982 (2009)</p> <p>Pressure Equipment Regulations: Occupational Health and Safety Act (Act No. 85 of 1993, Section 43)</p> <p>ISO 9001</p> <p>Machinery Directive 2006/42/EC</p> <p>Low Voltage Directive 2006/95/EC</p> <p>Pressure Equipment Directive 97/23/EC</p> <p>Sterilization – Large Steam Sterilizers EN 285</p> <p>Sterilization – Moist heat – Validation and routine control EN ISO 17665-1:2006</p> <p>EN 61010 and EN 61010-2-041.</p>                                                                                                                                                       |
| Performance Specifications | <p>Pressure sensor: temperature compensated, 0-400 kPa:</p> <p>Accuracy of 2% over the range</p> <p>Accuracy of 5 kPa at operating pressure.</p> <p>Temperature sensors: 50-150°C:</p> <p>Accuracy of 1% over the range</p> <p>Accuracy of 0.5°C at sterilisation temperature.</p>                                                                                                                                                                                                                                                                                                                                                                                                                                                                                                                                             |
| Accessories                | <p>The unit must include at least three perforated trays and not the box type. The box type may be offered as an extra.</p> <p>Each tray must hold at least 10 dental instruments. The chamber must be long enough to sterilise instruments up to 400mm long to enable sterilising of maternity instruments.</p> <p>1 replacement door seal.</p> <p>1 helix test kit PHC-C-214.</p> <p>1 Bowie-Dick test pack PHC-C-213.</p>                                                                                                                                                                                                                                                                                                                                                                                                   |
| Warranties                 | <p>2 year guarantee.</p> <p>Vacuum pump to be guaranteed for 5 years.</p> <p>Heating elements guaranteed for ten years.</p>                                                                                                                                                                                                                                                                                                                                                                                                                                                                                                                                                                                                                                                                                                    |
| Instructions to Suppliers  | <p>Technical details to be provided in a separate document.</p> <p>Specify power and water consumption per cycle.</p> <p>Indicate whether energy/water- saving features are standard or optional.</p> <p>Any other relevant certificates may be submitted.</p> <p>Suppliers to fully describe, in a separate document, all relevant information regarding the cycles available (Vacuum, Pressure, Temperature etc.).</p> <p>Range of accessories that can be ordered as required.</p> <p>Bidders must stipulate the cost of the following spare parts V.A.T. included:</p> <p>Door gasket.</p> <p>A schedule of the preventive maintenance programme must be supplied.</p> <p>Supplier to indicate which consumable items are required for (a) normal operation (b) standard maintenance and (c) testing of the equipment.</p> |
| Note to Procurement        | <p>5-year all-inclusive maintenance contract to be included.</p> <p>Procurement of Bowie-Dick PHC C-213 and Helix tests kits PHC-C-214 required.</p>                                                                                                                                                                                                                                                                                                                                                                                                                                                                                                                                                                                                                                                                           |

| Catalogue Number | Item Name                                        | Available on Transversal Contract | Contract Number or Code |
|------------------|--------------------------------------------------|-----------------------------------|-------------------------|
| PHC-E-112        | <b><i>Instrument steriliser:<br/>desktop</i></b> | No                                |                         |

## Functional Specifications

A Table top B class autoclave with a PRION Cycle.  
 Mains voltage MUST operate at 220 – 240V.  
 Current MUST not exceed 15 Amps.  
 MUST have no re-circulation of used water.  
 Chamber MUST be constructed of stainless steel or copper brass alloy. MUST be ASME or SABS approved.  
 The unit must have ability to heat the entire chamber efficiently.  
 MUST have heat insulated casing with built-in condensation coils and tank.  
 MUST have automatic timer to complete sterilizing cycle.  
 MUST be fitted with safety pressure valve.  
 MUST be fitted with temperature and pressure gauges.  
 Complete cycle after warm up MUST not exceed 30 min.  
 Chamber dimensions MUST be  $\pm 510$ mm deep by  $\pm 360$ mm diameter.  
 Minimum reservoir capacity 4l.  
 15 Amp plug MUST be supplied.  
 MUST have separate drying cycles which shut off automatically after 7 – 12 minutes.  
 The unit MUST be of a horizontal, chamber-type autoclave, and the entire unit MUST be microprocessor controlled.  
 The unit MUST monitor the water level, and if low, switch off to protect the elements from overheating and damage. The unit MUST switch off when water level low, and not when overheating.  
 The unit MUST include at least 3 perforated trays with a detachable handle.  
 Each tray MUST hold at least 10 dental instruments. The chamber MUST be long enough to sterilize instruments up to 300mm long.  
 All cycles MUST be automatic – no user intervention MUST be required, except to select the correct cycle and start the cycle.  
 End of cycle, and all error messages, MUST be indicated by a clear audible signal.  
 It MUST be possible to terminate any cycle at any stage.  
 The unit MUST display the operating temperature in an electronic format, and also display pressure.  
 The unit MUST be automatically controlled by temperature. Control for pressure as an additional measure will serve as a recommendation.  
 The unit MUST automatically protect itself and the operator against over temperature and overpressure.  
 The unit must also store data of at least the last 40 cycles. This data must be available in a printable and downloadable format. The unit MUST be able to connect to a computer, via a USB connection, to download the required information. **If any software program is needed to perform this, it must be included in the bid price as an accessory.**

|                            |                                                                                                                                                                                                                                                                                                                                                                                                                                                                                                                                                                                                                                                                                                                                                                                                                                                                                                                                                                                                                                                                                                                                                                                                                                                                                                                                                                                          |
|----------------------------|------------------------------------------------------------------------------------------------------------------------------------------------------------------------------------------------------------------------------------------------------------------------------------------------------------------------------------------------------------------------------------------------------------------------------------------------------------------------------------------------------------------------------------------------------------------------------------------------------------------------------------------------------------------------------------------------------------------------------------------------------------------------------------------------------------------------------------------------------------------------------------------------------------------------------------------------------------------------------------------------------------------------------------------------------------------------------------------------------------------------------------------------------------------------------------------------------------------------------------------------------------------------------------------------------------------------------------------------------------------------------------------|
|                            | <p>Water MUST be drained from the chamber after each and every cycle.</p> <p>External elements must be used, please state the wattage of the elements.</p> <p>The unit MUST have an insulated shell to protect operator from accidental heat injuries.</p> <p>Overpressure valve and all other safety valves must vent into a safe area, and not into working area.</p> <p>Unit must monitor the water quality in chamber, and stop cycle if the quality is not satisfactory.</p> <p>Reservoir and chamber to have a manual drain facility that is controlled with a positive on/off valve.</p> <p>Operator controls MUST be by touch-type, and not switches for infection control purposes.</p> <p>All electrical boards/electronic components MUST be well shielded/insulated from heat and potential water spillage.</p> <p>The door mechanism MUST have an auto-lock safety facility to prevent the door being opened during a cycle.</p> <p>It MUST not be possible to start a cycle if the door is not properly closed and sealed.</p> <p>The autoclave is to display time lapsed and the time remaining on cycle.</p> <p>The autoclave is to display time lapsed and the time remaining on cycle.</p> <p>The entire unit must form a self-contained working unit. It must be easy to move the unit to where it's required.</p> <p>Capacity of the chamber MUST be 16+ litres.</p> |
| Applicable Standards       | IEC 601-1, IEC 601-2, ISO 13458, Applicable parts of SANS 40:2009 (ed2.03 or later), ANSI/AAMI ST55:2010/ ( R) 2014.                                                                                                                                                                                                                                                                                                                                                                                                                                                                                                                                                                                                                                                                                                                                                                                                                                                                                                                                                                                                                                                                                                                                                                                                                                                                     |
| Performance Specifications | <p>Operating pressure MUST be 240 KPa.</p> <p>Operating temperature MUST not exceed 135°C.</p> <p>The unit MUST be able to perform the following cycle:</p> <ul style="list-style-type: none"> <li>134° with vacuum with drying</li> <li>134° with vacuum without drying</li> <li>134° non-vacuum with drying</li> <li>134° non-vacuum without drying</li> <li>121° with vacuum with drying</li> <li>121° with vacuum without drying</li> <li>121° non-vacuum with drying</li> <li>121° non-vacuum without drying.</li> </ul> <p>Unit MUST have a Prion cycle.</p> <p>The units MUST be able to sterilize unwrapped solids and hollow instruments, pouched solid and hollow instruments, single wrapped solid and hollow instruments, double wrapped solid and hollow instruments and porous items.</p> <p>Expected service life: 10 years.</p> <p>The up-time of the unit must be better than 98%, excluding scheduled preventative maintenance and software upgrades, measured on a quarterly basis. The percentage lower than 98% will be added to the warranty period. A sliding scale penalty clause will form part of the service contract. This will result in the maintenance payment being reduced by a pro rata amount that the up-time is less than 98%.</p>                                                                                                                  |



|                           |                                                                                                                                                                                                                                                                                                                                                                                                                                                                                                                                                                                                                                                                                                                                                                                                                                                                                                                                                                                    |
|---------------------------|------------------------------------------------------------------------------------------------------------------------------------------------------------------------------------------------------------------------------------------------------------------------------------------------------------------------------------------------------------------------------------------------------------------------------------------------------------------------------------------------------------------------------------------------------------------------------------------------------------------------------------------------------------------------------------------------------------------------------------------------------------------------------------------------------------------------------------------------------------------------------------------------------------------------------------------------------------------------------------|
| Accessories               | <p>Unit must be supplied with a spare door seal, and all necessary parts and consumables, to allow immediate operation after commissioning.</p> <p>Bowie-Dick test packs PHC-C-213.</p> <p>Helix test kits and strips PHC-C-214.</p>                                                                                                                                                                                                                                                                                                                                                                                                                                                                                                                                                                                                                                                                                                                                               |
| Warranties                | <p>2 years.</p> <p>Availability of spares guaranteed for 10 years.</p> <p>If unit requires off-site repair, a loan unit will be provided at no additional cost.</p> <p>Software changes to the equipment which are corrective in nature and initiated due to software errors, regulatory requirements or safety reasons, shall be delivered and installed at no charge for the life of the equipment.</p>                                                                                                                                                                                                                                                                                                                                                                                                                                                                                                                                                                          |
| Instructions to Suppliers | <p>Please provide cycle times for each of the programs for hot and cold cycle.</p> <p>Water distiller/demineraliser to be included for each autoclave. This must meet the required water quality for this autoclave. The price of this unit must be included in the bid price.</p> <p>Supply an all-inclusive, fully comprehensive five year preventative maintenance, service and repair contract covering all equipment, hardware and software. This contract would cover, but not be limited to the following: ALL PARTS, labour, traveling, accommodation, service and maintenance. The five-year maintenance plan must also include all quality check and quality assurance requirements, including all required calibrations. This contract will commence after the two-year warranty period has expired. Software updates and upgrades to be included.</p> <p>Supplier to deliver and commission.</p> <p>Supplier to train staff at each facility on correct operation.</p> |
| Note to Procurement       | <p>Procurement must include minimum 5-year maintenance plan.</p>                                                                                                                                                                                                                                                                                                                                                                                                                                                                                                                                                                                                                                                                                                                                                                                                                                                                                                                   |

## ORAL HEALTH

### Note:

- The technical specifications in this sub- section have been included for guidance. Term contracts for almost all the items will be released in the near future, and it is recommended that purchases should be made from the term contracts, as the offerings will have been diligently selected.
- The layout and installation of much of this equipment is critical with regard to space utilisation and efficient workflow. Floor-mounted items require under-floor services. Installation should be carefully planned, in consultation with competent professionals in the field, as well as Provincial infrastructure officials.
- Dental Assistant's stool and Dentist's Stool are located in Furniture – Clinical.

| Catalogue Number | Item Name                                    | Available on Transversal Contract | Contract Number or Code |
|------------------|----------------------------------------------|-----------------------------------|-------------------------|
| PHC-E-164        | <b><i>Amalgam separator: 2 surgeries</i></b> | In preparation                    |                         |

|                            |                                                                                                                                                                                                                                                                                                                                                                                                                                                                                                                                                                                                                                                                                                                                                  |
|----------------------------|--------------------------------------------------------------------------------------------------------------------------------------------------------------------------------------------------------------------------------------------------------------------------------------------------------------------------------------------------------------------------------------------------------------------------------------------------------------------------------------------------------------------------------------------------------------------------------------------------------------------------------------------------------------------------------------------------------------------------------------------------|
| Functional Specifications  | <p>A fixed installation amalgam separator for up to 2 surgeries. The unit MUST have the following features:</p> <ul style="list-style-type: none"> <li>Fixed installation</li> <li>Equipped for connection of several treatment units</li> <li>Serve number of surgeries: Maximum 2</li> <li>Output power: Single-phase, Approximately 115W</li> <li>Noise level: No more than 60dB(A)</li> <li>Volume of collector vessel: Approximately 90 cm<sup>3</sup></li> <li>Separation rate: At least 95%</li> <li>Flow rate at least 4 l/min</li> <li>Automatic filling level check</li> <li>Automatic switch on when waste water is available from treatment unit</li> <li>Centrifugal separator with hydrodynamic self-cleaning function.</li> </ul> |
| Applicable Standards       | ISO 11143: 1999.                                                                                                                                                                                                                                                                                                                                                                                                                                                                                                                                                                                                                                                                                                                                 |
| Performance Specifications | Expected service life 10 years.                                                                                                                                                                                                                                                                                                                                                                                                                                                                                                                                                                                                                                                                                                                  |
| Accessories                | Collection Container with recycle kit (optional).                                                                                                                                                                                                                                                                                                                                                                                                                                                                                                                                                                                                                                                                                                |
| Warranties                 | <p>2 years.</p> <p>Availability of spares guaranteed for 10 years.</p>                                                                                                                                                                                                                                                                                                                                                                                                                                                                                                                                                                                                                                                                           |
| Instructions to Suppliers  | Installation should be carefully planned, in consultation with competent professionals in the field, as well as Provincial infrastructure officials.                                                                                                                                                                                                                                                                                                                                                                                                                                                                                                                                                                                             |
| Note to Procurement        |                                                                                                                                                                                                                                                                                                                                                                                                                                                                                                                                                                                                                                                                                                                                                  |

| Catalogue Number | Item Name                          | Available on Transversal Contract | Contract Number or Code |
|------------------|------------------------------------|-----------------------------------|-------------------------|
| PHC-E-166        | <b><i>Amalgamator: digital</i></b> | In preparation                    |                         |

|                            |                                                                                                                                                                                                                                                                                                                                                                                                                                                                                 |
|----------------------------|---------------------------------------------------------------------------------------------------------------------------------------------------------------------------------------------------------------------------------------------------------------------------------------------------------------------------------------------------------------------------------------------------------------------------------------------------------------------------------|
| Functional Specifications  | <p>Digitally controlled amalgamator.</p> <p>Must accept mercury and glass ionomer capsules.</p> <p>Automatic switch-off. Electronic time control.</p> <p>Operating cycle up to 99 seconds.</p> <p>Body of shock-resistant plastic. Double-insulated.</p> <p>Must operate on 240V AC, 50/60 Hz.</p> <p>Must be fitted with power cord and SABS-approved moulded 15-amp, 3-prong plug.</p> <p>Unit to have a sealed and isolated mixing chamber which deactivates on opening.</p> |
| Applicable Standards       | <p>ISO 7488 most recent.</p> <p>ISO 13897: 2018.</p> <p>IEC 80601-2-60: 2012.</p>                                                                                                                                                                                                                                                                                                                                                                                               |
| Performance Specifications | <p>Noise level less than 65dB.</p> <p>Expected service life 10 years.</p>                                                                                                                                                                                                                                                                                                                                                                                                       |
| Accessories                | <p>Replaceable capsule holder.</p>                                                                                                                                                                                                                                                                                                                                                                                                                                              |
| Warranties                 | <p>2 years.</p> <p>Availability of spares guaranteed for 10 years.</p>                                                                                                                                                                                                                                                                                                                                                                                                          |
| Instructions to Suppliers  | <p>Installation should be carefully planned, in consultation with competent professionals in the field, as well as Provincial infrastructure officials.</p>                                                                                                                                                                                                                                                                                                                     |
| Note to Procurement        |                                                                                                                                                                                                                                                                                                                                                                                                                                                                                 |

| Catalogue Number | Item Name                                              | Available on Transversal Contract | Contract Number or Code |
|------------------|--------------------------------------------------------|-----------------------------------|-------------------------|
| PHC-E-167        | <b>Desktop Autoclave S-Type for Dental Instruments</b> | In preparation                    |                         |

|                            |                                                                                                                                                                                                                                                                                                                                                                                                                                                                                                                                                                                                                                              |
|----------------------------|----------------------------------------------------------------------------------------------------------------------------------------------------------------------------------------------------------------------------------------------------------------------------------------------------------------------------------------------------------------------------------------------------------------------------------------------------------------------------------------------------------------------------------------------------------------------------------------------------------------------------------------------|
| Functional Specifications  | <p>Cassette-type autoclave.</p> <p>Distilled water reservoir.</p> <p>Steam generator.</p> <p>Must have S cycle – chamber air displaced by pressurised steam. Positive Pressure Pulsed Air displacement and shorter cycle times preferred.</p> <p>Cassette measurements (external): minimum 48cm x 17cm X8cm.</p> <p>Sterilisation chamber volume minimum 1,6l.</p> <p>Thin-walled cassette, with external cool-touch handle.</p> <p>Bacterial filter for drying cycle.</p> <p>Easy cycle selection. Automatic temperature, pressure and time control and recording.</p> <p>2m power lead with moulded SABS-approved 15 Amp 3-prong plug.</p> |
| Applicable Standards       | <p>93/42/EEC Medical Device Directive.</p> <p>PrEn 13060 Small steam sterilizer – General Requirements.</p> <p>EN 61010-1 laboratory equipment – Safety requirements.</p> <p>EN 61010 -2-041 Specific instructions for steam steriliser.</p> <p>EN 61326 Electromagnetic compatibility.</p>                                                                                                                                                                                                                                                                                                                                                  |
| Performance Specifications | <p>Temperature 134°C for normal instruments, 121°C for rubber or plastics.</p> <p>Full sterilisation cycle (including drying) in less than 18 minutes.</p> <p>Automatic cycle abortion and alarm if any parameter not reached or maintained.</p> <p>Expected service life 15 years.</p>                                                                                                                                                                                                                                                                                                                                                      |
| Accessories                | <p>Thin-walled cassette.</p> <p>Bowie-dick test pack PHC-C-213.</p> <p>Helix Test Kit PHC-C-214.</p>                                                                                                                                                                                                                                                                                                                                                                                                                                                                                                                                         |
| Warranties                 | <p>2 years.</p> <p>Availability of spares guaranteed for 10 years.</p>                                                                                                                                                                                                                                                                                                                                                                                                                                                                                                                                                                       |
| Instructions to Suppliers  | <p>Provide pricing for additional cassette.</p> <p>Describe how cycle data can be extracted from the autoclave, and provide pricing for any options (e.g. data logger, USB or Ethernet connectivity, built-in printer or printer port).</p> <p>Specify whether a demineraliser or a distiller is required.</p> <p>Water demineraliser and/or distiller must be priced separately.</p>                                                                                                                                                                                                                                                        |
| Note to Procurement        | <p>In most cases, a water demineraliser or distiller will be required (unless the facility has an existing distiller). Will always be required for use by an outreach team.</p> <p>Procurement of Bowie-Dick PHC C-213 and Helix tests kits PHC-C-214 required.</p> <p>Multi-year all-inclusive maintenance plan preferred.</p>                                                                                                                                                                                                                                                                                                              |

| Catalogue Number | Item Name                        | Available on Transversal Contract | Contract Number or Code |
|------------------|----------------------------------|-----------------------------------|-------------------------|
| PHC-E-168        | <b>Compressor: 2-4 surgeries</b> | In preparation                    |                         |

|                            |                                                                                                                                                                                                                                                                                                                                                                                                                                                                                                                                       |
|----------------------------|---------------------------------------------------------------------------------------------------------------------------------------------------------------------------------------------------------------------------------------------------------------------------------------------------------------------------------------------------------------------------------------------------------------------------------------------------------------------------------------------------------------------------------------|
| Functional Specifications  | <p>Voltage 220/240 V 1,5 kW with built in thermal overload protection as per user requirement.</p> <p>Power 0.75Kw 1HP.</p> <p>Fitted with ¼" safety release valve.</p> <p>Tank pressure gauge.</p> <p>Pressure range control switch, 6 – 10 bar.</p> <p>Noise level maximum 60 DB (A).</p> <p>Either piston type or turbo type.</p> <p>Reverse pressure exhaust valve for motor protection.</p> <p>Air filter for filtration of 10 micron particles, with automatic drain valve.</p> <p>Oil free with automatic drainage system.</p> |
| Applicable Standards       | <p>ISO 22052.</p> <p>ISO 22595-2:2008.</p> <p>ISO 80601-2-2-12.</p>                                                                                                                                                                                                                                                                                                                                                                                                                                                                   |
| Performance Specifications | <p>Delivery capacity not less than 150 l/min maximum pressure 1000 kPa.</p> <p>Storage Capacity at least 35l-75l.</p> <p>Expected service life 15 years.</p>                                                                                                                                                                                                                                                                                                                                                                          |
| Accessories                |                                                                                                                                                                                                                                                                                                                                                                                                                                                                                                                                       |
| Warranties                 | <p>2 years.</p> <p>Availability of spares guaranteed for 10 years.</p>                                                                                                                                                                                                                                                                                                                                                                                                                                                                |
| Instructions to Suppliers  | <p>Inspect premises and agree optimal installation location with competent professional personnel and provincial infrastructure personnel.</p>                                                                                                                                                                                                                                                                                                                                                                                        |
| Note to Procurement        | <p>5-year maintenance contract preferred. This item is not needed for single surgery-mobile dental delivery system has built-in compressor.</p>                                                                                                                                                                                                                                                                                                                                                                                       |

| Catalogue Number | Item Name                                       | Available on Transversal Contract | Contract Number or Code |
|------------------|-------------------------------------------------|-----------------------------------|-------------------------|
| PHC-E-169        | <b><i>Cuspidor/Spittoon/<br/>Water Unit</i></b> | In preparation                    |                         |

|                            |                                                                                                                                                                                                                                                                                                                                                                                                                                                                                                                                     |
|----------------------------|-------------------------------------------------------------------------------------------------------------------------------------------------------------------------------------------------------------------------------------------------------------------------------------------------------------------------------------------------------------------------------------------------------------------------------------------------------------------------------------------------------------------------------------|
| Functional Specifications  | <p>Chair-mounted either left or right.</p> <p>Spittoon must be removable without any tools, for easy cleaning.</p> <p>Ceramic bowls spittoon.</p> <p>Warm water tumbler filler.</p> <p>Spittoon flush facilities.</p> <p>Solids trap for spittoon bowl.</p> <p>Selective holder consisting of:</p> <ul style="list-style-type: none"> <li>Solids collector</li> <li>One HVE suction tube</li> <li>One saliva ejector tube</li> <li>Cup fill shut off valve incorporated</li> <li>Low voltage remote control for suction.</li> </ul> |
| Applicable Standards       | <p>ISO 7494-2:2015.</p> <p>ISO 16945: 2015 Test methods for dental unit waterline biofilm treatment.</p> <p>IEC 80601-2-60: 2012.</p>                                                                                                                                                                                                                                                                                                                                                                                               |
| Performance Specifications | <p>Expected service life 15 years.</p>                                                                                                                                                                                                                                                                                                                                                                                                                                                                                              |
| Accessories                | <p>Autoclaveable HVE cannulas to be supplied.</p>                                                                                                                                                                                                                                                                                                                                                                                                                                                                                   |
| Warranties                 | <p>5 years.</p> <p>Availability of spares guaranteed for 10 years.</p>                                                                                                                                                                                                                                                                                                                                                                                                                                                              |
| Instructions to Suppliers  | <p>Inspect premises and agree optimal installation location with competent professional personnel and provincial infrastructure personnel.</p>                                                                                                                                                                                                                                                                                                                                                                                      |
| Note to Procurement        | <p>5-year maintenance contract preferred.</p>                                                                                                                                                                                                                                                                                                                                                                                                                                                                                       |

| Catalogue Number | Item Name                                                                | Available on Transversal Contract | Contract Number or Code |
|------------------|--------------------------------------------------------------------------|-----------------------------------|-------------------------|
| PHC-E-170        | <b><i>Delivery system: mobile, with hand pieces, non-fibre-optic</i></b> | In preparation                    |                         |

|                            |                                                                                                                                                                                                                                                                                                                                                                                                                                                                                                                                                                                                                                                                                                                                     |
|----------------------------|-------------------------------------------------------------------------------------------------------------------------------------------------------------------------------------------------------------------------------------------------------------------------------------------------------------------------------------------------------------------------------------------------------------------------------------------------------------------------------------------------------------------------------------------------------------------------------------------------------------------------------------------------------------------------------------------------------------------------------------|
| Functional Specifications  | <p>Dental cabinet housing the following:</p> <ul style="list-style-type: none"> <li>3 handpiece outlets ( 4-6 holes)</li> <li>3 in 1 syringe</li> <li>Selector switch</li> <li>Foot control</li> <li>Master shut off assembly</li> <li>Compressor (25l-50l; ≥100l/min)</li> <li>Cleanwater system</li> <li>Self-illuminating LED handpiece with coupling</li> <li>Internal spray straight handpiece</li> <li>Contra angle blue handpiece</li> <li>Prophylaxis handpiece</li> <li>Air motor 4-hole</li> </ul> <p>The unit must operate on 240vac 50/60hz fitted with 3-prongs plug</p> <p>Unit to be fitted with smooth running four swivel lockable wheels</p> <p>Height = 700mm-900mm width = 400mm-500mm depth = 480mm-600mm.</p> |
| Applicable Standards       | <p>ISO 7494-1:2011.</p> <p>ISO 7494-2:2015.</p> <p>ISO 16954: 2015.</p> <p>IEC 80601-2-60: 2012.</p> <p>ISO 14457:2017 handpieces and motors.</p>                                                                                                                                                                                                                                                                                                                                                                                                                                                                                                                                                                                   |
| Performance Specifications | Expected service life 15 years.                                                                                                                                                                                                                                                                                                                                                                                                                                                                                                                                                                                                                                                                                                     |
| Accessories                | All handpieces, heads and connectors. All installation hardware.                                                                                                                                                                                                                                                                                                                                                                                                                                                                                                                                                                                                                                                                    |
| Warranties                 | <p>5 years.</p> <p>Availability of spares guaranteed for 10 years.</p>                                                                                                                                                                                                                                                                                                                                                                                                                                                                                                                                                                                                                                                              |
| Instructions to Suppliers  | Inspect premises and agree optimal installation location with competent professional personnel and provincial infrastructure personnel.                                                                                                                                                                                                                                                                                                                                                                                                                                                                                                                                                                                             |
| Note to Procurement        | <p>This is the preferred option for a single surgery, in a facility without a central compressor. Not compatible with fibre-optic hand pieces.</p> <p>5 year maintenance contract preferred.</p>                                                                                                                                                                                                                                                                                                                                                                                                                                                                                                                                    |

| Catalogue Number | Item Name                                                               | Available on Transversal Contract | Contract Number or Code |
|------------------|-------------------------------------------------------------------------|-----------------------------------|-------------------------|
| PHC-E-171        | <b><i>Delivery system: fixed, with hand pieces, non-fibre-optic</i></b> | In preparation                    |                         |

|                           |                                                                                                                                                                                                                                                                                                                                                                                                                                                                                                                                                                                                                                                                                                                                                                                                                                                                                                                                                                                                                                                                                                                                                                                                                                                                                                                                                                                                                                                                                                                                                                                                                                                                                                                                                                                               |
|---------------------------|-----------------------------------------------------------------------------------------------------------------------------------------------------------------------------------------------------------------------------------------------------------------------------------------------------------------------------------------------------------------------------------------------------------------------------------------------------------------------------------------------------------------------------------------------------------------------------------------------------------------------------------------------------------------------------------------------------------------------------------------------------------------------------------------------------------------------------------------------------------------------------------------------------------------------------------------------------------------------------------------------------------------------------------------------------------------------------------------------------------------------------------------------------------------------------------------------------------------------------------------------------------------------------------------------------------------------------------------------------------------------------------------------------------------------------------------------------------------------------------------------------------------------------------------------------------------------------------------------------------------------------------------------------------------------------------------------------------------------------------------------------------------------------------------------|
| Functional Specifications | <p>A Dental delivery system, complete with tubing, spittoon, scaler, clean water system and curing light. Control block must have 4-chair position controls (including reset button).</p> <p>The unit must be connected to the cuspidor/ spittoon/ water unit.</p> <p>Unit must have four/ six (4/6) Handpiece tube holes or more (all modes/functions) with self-activations. Automatic selection of cutting H/P.</p> <p>3 in 1 Syringe with pinch valve technique and sterilisable sleeve and nozzle.</p> <p>The unit to have at least two brake handles (one on each side of delivery head).</p> <p>To have touchpad for controls.</p> <p>Console with water flow control valve for each handpiece, if not incorporated in handpiece: must have a minimum of 4 tubes.</p> <p>Console with 4 control switches for the following:</p> <ul style="list-style-type: none"> <li>on/off Handpiece water/air spray</li> <li>on/off handpiece air spray coolant</li> <li>on/off tumbler filler</li> <li>on/off spittoon bowel rinse.</li> </ul> <p>Individual handpiece pressure adjustment reliable water retraction system required.</p> <p>Self-illuminating LED handpiece with coupling.</p> <p>Internal spray straight handpiece.</p> <p>Contra angle blue handpiece.</p> <p>Prophylaxis handpiece.</p> <p>Air motor 4-hole.</p> <p>The heads must be durable, providing many years of reliability.</p> <p>Free hanging straight/ whip arm air outlet hoses are preferred.</p> <p>The clean water bottle must be standard (1l).</p> <p>It must come with a piezo scaler system with foot switch.</p> <p>The curing light (LED with at least 3 settings levels) must also be supplied with the system.</p> <p>Master on/off switch provided at connection box.</p> <p>SABS PLUG (2 Phase).</p> |
| Applicable Standards      | <p>ISO 7494-1:2011.</p> <p>ISO 7494-2:2015.</p> <p>ISO 16954: 2015.</p> <p>IEC 80601-2-60: 2012.</p> <p>ISO 10650:2015 Powered polymerisation activators.</p>                                                                                                                                                                                                                                                                                                                                                                                                                                                                                                                                                                                                                                                                                                                                                                                                                                                                                                                                                                                                                                                                                                                                                                                                                                                                                                                                                                                                                                                                                                                                                                                                                                 |



|                            |                                                                                                                                         |
|----------------------------|-----------------------------------------------------------------------------------------------------------------------------------------|
| Performance Specifications | Expected service life 15 years.                                                                                                         |
| Accessories                | All handpieces, heads and connectors. All installation hardware.                                                                        |
| Warranties                 | 5 years.<br>Availability of spares guaranteed for 10 years.                                                                             |
| Instructions to Suppliers  | Inspect premises and agree optimal installation location with competent professional personnel and provincial infrastructure personnel. |
| Note to Procurement        |                                                                                                                                         |

| Catalogue Number | Item Name                         | Available on Transversal Contract | Contract Number or Code |
|------------------|-----------------------------------|-----------------------------------|-------------------------|
| PHC-E-172        | <b><i>Dental chair: basic</i></b> | In preparation                    |                         |

|                            |                                                                                                                                                                                                                                                                                                                                                                                                                                                                                                                                                                                                                                                                                                                                                                                                                                                                                                                                                                                                                                                                                                                                                                                                                                                  |
|----------------------------|--------------------------------------------------------------------------------------------------------------------------------------------------------------------------------------------------------------------------------------------------------------------------------------------------------------------------------------------------------------------------------------------------------------------------------------------------------------------------------------------------------------------------------------------------------------------------------------------------------------------------------------------------------------------------------------------------------------------------------------------------------------------------------------------------------------------------------------------------------------------------------------------------------------------------------------------------------------------------------------------------------------------------------------------------------------------------------------------------------------------------------------------------------------------------------------------------------------------------------------------------|
| Functional Specifications  | <p>Anatomically contoured seat and backrest for comfortable full support in all positions suitable for treatment of both adults &amp; children.</p> <p>The chair offered must have double articulating headrest which is reversible (cushion included).</p> <p>Adjustable backrest-thickness 25mm-50mm.</p> <p>Upholstery must be seamless durable waterproof material that can be easily cleaned and withstand disinfectants and cleaning chemicals.</p> <p>Upholstery must be removable.</p> <p>Replaceable plastic cover must be provided to protect upholstery in shoe area.</p> <p>Armrest: Positions swing out/ down Arm.</p> <p>Chair must be Programmable.</p> <p>The chair must be floor-mounted.</p> <p>Accessory foot controls MUST be fitted to chair base to facilitate both height and Trendelenburg adjustment.</p> <p>Total length at maximum extension 1820mm-2000mm.</p> <p>Base (H x W x D) : 600mm -650mm x 500mm-560mm x 490mm-510mm.</p> <p>Electro mechanical/hydraulic lift system fitted in chair base.</p> <p>The seat surface must be 410mm-480mm x 400mm-480mm (LxB).</p> <p>Chair swivel 60°-70° (≤35° each side of center).</p> <p>To operate on 240 VAC 50/60Hz, fitted with standard hospital 3-prongs plug.</p> |
| Applicable Standards       | ISO 6875: 2011.                                                                                                                                                                                                                                                                                                                                                                                                                                                                                                                                                                                                                                                                                                                                                                                                                                                                                                                                                                                                                                                                                                                                                                                                                                  |
| Performance Specifications | <p>Range of lift height 342.90 mm to 800.10 mm.</p> <p>Recline range +62° to -12°.</p> <p>Weight 200kg SAMHS (to provide (carry capacity of 200kg).</p> <p>Expected service life 15 years.</p>                                                                                                                                                                                                                                                                                                                                                                                                                                                                                                                                                                                                                                                                                                                                                                                                                                                                                                                                                                                                                                                   |
| Accessories                |                                                                                                                                                                                                                                                                                                                                                                                                                                                                                                                                                                                                                                                                                                                                                                                                                                                                                                                                                                                                                                                                                                                                                                                                                                                  |
| Warranties                 | <p>5 years.</p> <p>Availability of spares guaranteed for minimum 10 years.</p>                                                                                                                                                                                                                                                                                                                                                                                                                                                                                                                                                                                                                                                                                                                                                                                                                                                                                                                                                                                                                                                                                                                                                                   |
| Instructions to Suppliers  | Inspect premises and agree optimal installation location with competent professional personnel and provincial infrastructure personnel.                                                                                                                                                                                                                                                                                                                                                                                                                                                                                                                                                                                                                                                                                                                                                                                                                                                                                                                                                                                                                                                                                                          |
| Note to Procurement        | 5-year maintenance contract preferred.                                                                                                                                                                                                                                                                                                                                                                                                                                                                                                                                                                                                                                                                                                                                                                                                                                                                                                                                                                                                                                                                                                                                                                                                           |

| Catalogue Number | Item Name                            | Available on Transversal Contract | Contract Number or Code |
|------------------|--------------------------------------|-----------------------------------|-------------------------|
| PHC-E-173        | <b><i>Dental chair: portable</i></b> | In preparation                    |                         |

|                            |                                                                                                                                                                                                                                                                                                                                                                                                                                                                                       |
|----------------------------|---------------------------------------------------------------------------------------------------------------------------------------------------------------------------------------------------------------------------------------------------------------------------------------------------------------------------------------------------------------------------------------------------------------------------------------------------------------------------------------|
| Functional Specifications  | <p>A Portable chair that can be carried by an operator.</p> <p>The unit must be able to carry up to 200kg.</p> <p>It must have medium alloy construction.</p> <p>The unit must be able to be used as a sit-up chair.</p> <p>The maximum weight must not be more than 12.5kg.</p> <p>The dimensions must not be more than 510 x 270 x1000mm.</p> <p>It must come complete with a back pack.</p> <p>The unit must make provision for a portable dental light, spit funnel and tray.</p> |
| Applicable Standards       | ISO 6875: 2011.                                                                                                                                                                                                                                                                                                                                                                                                                                                                       |
| Performance Specifications | <p>The seat must adjustable from 35 to 60cm.</p> <p>Expected service life 10 years.</p>                                                                                                                                                                                                                                                                                                                                                                                               |
| Accessories                | <p>Backpack.</p> <p>Compatible portable dental light, spit funnel and tray.</p>                                                                                                                                                                                                                                                                                                                                                                                                       |
| Warranties                 | <p>2 years.</p> <p>Availability of spares guaranteed for 10 years.</p>                                                                                                                                                                                                                                                                                                                                                                                                                |
| Instructions to Suppliers  |                                                                                                                                                                                                                                                                                                                                                                                                                                                                                       |
| Note to Procurement        | Ensure that order includes portable dental light, spit funnel and tray, unless specifically excluded by the requesting user.                                                                                                                                                                                                                                                                                                                                                          |

| Catalogue Number | Item Name                                   | Available on Transversal Contract | Contract Number or Code |
|------------------|---------------------------------------------|-----------------------------------|-------------------------|
| PHC-E-174        | <b><i>Dental curing light: corded</i></b>   | No                                |                         |
| PHC-E-175        | <b><i>Dental curing light: cordless</i></b> | No                                |                         |

|                            |                                                                                                                                                                                                                                                                                                                                                                                                                                        |
|----------------------------|----------------------------------------------------------------------------------------------------------------------------------------------------------------------------------------------------------------------------------------------------------------------------------------------------------------------------------------------------------------------------------------------------------------------------------------|
| Functional Specifications  | <p>Quart tungsten halogen or LED technology.</p> <p>Built-in cooling system.</p> <p>In cordless models, audio-visual warning when battery charge is dropping below adequate levels to deliver stated irradiance. Auto-shutdown when power too low.</p> <p>Selectable exposure time. Accurate timer control.</p> <p>Cordless model to have power cord with moulded SABS-approved plug. Double-insulated.</p>                            |
| Applicable Standards       | ISO 10650:2015 Powered polymerisation activators.                                                                                                                                                                                                                                                                                                                                                                                      |
| Performance Specifications | <p>The ISO standard is insufficient. Additional requirements:</p> <p>Verifiable documentation of irradiance (milliWatt/cm<sup>2</sup> at light tip, and decrease in irradiance as a function of distance from the tip (in mm, up to 10mm)</p> <p>Verifiable documentation of spectral power vs wavelength of light</p> <p>Verifiable analysis of the irradiance distribution (beam profile)</p> <p>Expected service life 10 years.</p> |
| Accessories                | <p>All necessary curing probes/tips.</p> <p>Cordless model must be supplied with charger (complete with power cord).</p>                                                                                                                                                                                                                                                                                                               |
| Warranties                 | <p>2 years.</p> <p>Availability of spares guaranteed for 5 years.</p>                                                                                                                                                                                                                                                                                                                                                                  |
| Instructions to Suppliers  | Describe the cooling system of the device.                                                                                                                                                                                                                                                                                                                                                                                             |
| Note to Procurement        | Some low-cost devices that nominally meet the ISO standard, fail to achieve adequate resin hardening in practice. It is therefore necessary to insist on the validations listed above, in addition to proof of compliance with ISO 10650:2015.                                                                                                                                                                                         |

| Catalogue Number | Item Name                                                    | Available on Transversal Contract | Contract Number or Code |
|------------------|--------------------------------------------------------------|-----------------------------------|-------------------------|
| PHC-E-176        | <b><i>Turbine: full range</i></b>                            | In preparation                    |                         |
| PHC-E-177        | LED straight handpiece: for micromotor – 1:1                 |                                   |                         |
| PHC-E-178        | LED contra-angle handpiece for micromotor – 1:1              |                                   |                         |
| PHC-E-179        | LED contra-angle handpiece for micromotor – 1:1 blue         |                                   |                         |
| PHC-E-180        | LED contra-angle handpiece for micromotor – reduction, green |                                   |                         |
| PHC-E-181        | LED contra-angle handpiece for micromotor – increasing, red  |                                   |                         |
| PHC-E-182        | LED Prophylaxis handpiece: reduction, green                  |                                   |                         |
| PHC-E-183        | Micromotor: air                                              |                                   |                         |

## Functional Specifications

**TURBINE FULL RANGE**

To fit 4-6 hole standard supply tubing.  
 Speed 350 000 rpm minimum at 2.2 kg per cm.  
 Ballbearing, output approximately 10 watts.  
 Field replaceable rotor, one spare rotor to be supplied.  
 Metal bur change chuck, push type system.  
 Quick action coupling for easy lubrication.  
 Guarantee time of turbine must be indicated – minimum 12 months.  
 Air consumption MUST exceed 36 l/m.  
 Noise level not to exceed 75 db.  
 Autoclavable up to 135°C.

**With non fibre optic function**

To come with durable metal casing (stainless steel).

**LED STRAIGHT HANDPIECE FOR MICROMOTOR – AIR FULL RANGE**

Standard 1 : 1 transmission.  
 Ballbearing.  
 To take burs ISO type 104 44, 50 mm with diameter of 2,35 mm.  
 Maximum speed 40 000 rpm.  
 E-type quick disconnection.  
 Water spray incorporated internally.  
 Autoclavable up to 135°C.  
 Autoclavable up to 135°C.  
 Quick action coupling for easy lubrication.  
 To come with durable metal casing (stainless steel).

## Functional Specifications

**LED CONTRA-ANGLE HANDPIECE FOR MICROMOTOR – AIR FULL RANGE**

Standard transmission 1 : 1 blue.  
 Push button type system.  
 Ballbearing type.  
 Maximum speed 40 000 rpm.  
 To accommodate ISO type 204 2.35 mm diameter latch type burs.  
 E-type quick disconnection.  
 Water spray incorporated internally.  
 Autoclavable up to 135°C.  
 Quick action coupling for easy lubrication.  
 To come with durable metal casing (stainless steel).

**LED CONTRA-ANGLE HANDPIECE FOR MICROMOTOR – AIR FULL RANGE**

Reduction hand piece Green.  
 Push button type system.  
 Ballbearing type.  
 To accommodate ISO type 204 2.35 mm diameter latch type burs.  
 E-type quick disconnection.  
 Water spray incorporated internally.  
 Autoclavable up to 135°C.  
 Quick action coupling for easy lubrication.  
 To come with durable metal casing (stainless steel).

**LED CONTRA-ANGLE HANDPIECE FOR MICROMOTOR – AIR FULL RANGE**

Speed increasing red.  
 Push button type system.  
 Ballbearing type.  
 To accommodate ISO type 204 2.35 mm diameter latch type burs.  
 E-type quick disconnection.  
 Water spray incorporated internally.  
 Autoclavable up to 135°C.  
 Quick action coupling for easy lubrication.  
 To come with durable metal casing (stainless steel).

**LED PROPHYLAXIS HANDPIECE FULL RANGE**

Reduction Green.  
 To fit E-Type quick disconnection.  
 Sealed ball bearing.  
 To accept snap-on and or screw in cups and brushes.  
 Autoclavable up to 135°C.  
 Quick action coupling for easy lubrication.  
 To come with durable metal casing (stainless steel).

|                            |                                                                                                                                                                                                                                                                                                                                                                                                                                                                                                                                            |
|----------------------------|--------------------------------------------------------------------------------------------------------------------------------------------------------------------------------------------------------------------------------------------------------------------------------------------------------------------------------------------------------------------------------------------------------------------------------------------------------------------------------------------------------------------------------------------|
| Functional Specifications  | <p><b>MICROMOTOR – AIR FULL RANGE</b></p> <p>Speed range 5 000 – 40 000 rpm.</p> <p>Output 20W Power – min Ncm Torque min.</p> <p>E-Type quick coupling.</p> <p>Forward and reverse rotation.</p> <p>Weight not to exceed 90gm. Speed control selector by means of control ring.</p> <p>Water spray/air facility to be incorporated internally.</p> <p>Maximum air consumption 45 l/m.</p> <p>Autoclavable up to 135°C.</p> <p>Quick action coupling for easy lubrication.</p> <p>To come with durable metal casing (stainless steel).</p> |
| Applicable Standards       | ISO 14457: 2017.                                                                                                                                                                                                                                                                                                                                                                                                                                                                                                                           |
| Performance Specifications | Expected service life 10 years.                                                                                                                                                                                                                                                                                                                                                                                                                                                                                                            |
| Accessories                |                                                                                                                                                                                                                                                                                                                                                                                                                                                                                                                                            |
| Warranties                 | 2 years.                                                                                                                                                                                                                                                                                                                                                                                                                                                                                                                                   |
| Instructions to Suppliers  |                                                                                                                                                                                                                                                                                                                                                                                                                                                                                                                                            |
| Note to Procurement        |                                                                                                                                                                                                                                                                                                                                                                                                                                                                                                                                            |

| Catalogue Number | Item Name                       | Available on Transversal Contract | Contract Number or Code |
|------------------|---------------------------------|-----------------------------------|-------------------------|
| PHC-E-184        | <b><i>Dental light: LED</i></b> | In preparation                    |                         |

|                            |                                                                                                                                                                                                                                                                                                                                                                                                                                                                                                                                                                                                                                                                                                                                                                                         |
|----------------------------|-----------------------------------------------------------------------------------------------------------------------------------------------------------------------------------------------------------------------------------------------------------------------------------------------------------------------------------------------------------------------------------------------------------------------------------------------------------------------------------------------------------------------------------------------------------------------------------------------------------------------------------------------------------------------------------------------------------------------------------------------------------------------------------------|
| Functional Specifications  | <p>The light MUST use LED technology.</p> <p>Touch sensor ON/OFF and manual control.</p> <p>Voltage 220 – 240, 50 Hz.</p> <p>Can be mounted to Chair or Ceiling.</p> <p>Rotational axes: Horizontal, vertical, diagonal.</p> <p>Constant colour temperature 5,000K.</p> <p>Temperature increase not more than 5 degrees C above room temperature at maximum intensity.</p> <p>Light pattern: 85mm-95mm x 145mm-160mm at 700mm.</p> <p>Shadow-free illumination.</p> <p>On/Off switch in lamp yoke, and provision for altering light intensity, without changing colour temperature.</p> <p>Power Consumption: 12W-17W or less.</p> <p>With Mode Selection.</p> <p>The light must have a shield that is scratch and discolouration resistant for protection against bulb shattering.</p> |
| Applicable Standards       | ISO 9670: 2014.                                                                                                                                                                                                                                                                                                                                                                                                                                                                                                                                                                                                                                                                                                                                                                         |
| Performance Specifications | <p>Adjustable light intensity: 15000Lux-30000Lux at constant colour temperature.</p> <p>Expected service life 15 years.</p>                                                                                                                                                                                                                                                                                                                                                                                                                                                                                                                                                                                                                                                             |
| Accessories                | <p>All mounting hardware.</p> <p>1 spare bulb.</p>                                                                                                                                                                                                                                                                                                                                                                                                                                                                                                                                                                                                                                                                                                                                      |
| Warranties                 | <p>5 years.</p> <p>Availability of spares guaranteed for 10 years.</p>                                                                                                                                                                                                                                                                                                                                                                                                                                                                                                                                                                                                                                                                                                                  |
| Instructions to Suppliers  | <p>Describe ceiling weight-bearing requirements.</p> <p>Inspect premises and agree optimal installation location with competent professional personnel and provincial infrastructure personnel. Deliver, install, connect and commission.</p>                                                                                                                                                                                                                                                                                                                                                                                                                                                                                                                                           |
| Note to Procurement        | Spare LED bulb in series with this item.                                                                                                                                                                                                                                                                                                                                                                                                                                                                                                                                                                                                                                                                                                                                                |



| Catalogue Number | Item Name                        | Available on Transversal Contract | Contract Number or Code |
|------------------|----------------------------------|-----------------------------------|-------------------------|
| PHC-E-185        | <b><i>Dental scaler: air</i></b> | In preparation                    |                         |

|                            |                                                                                                                                                                                                                |
|----------------------------|----------------------------------------------------------------------------------------------------------------------------------------------------------------------------------------------------------------|
| Functional Specifications  | <p>Delivery-unit mountable scaler.</p> <p>Handpiece washable and autoclaveable up to 135°C.</p> <p>At least 3 scaling tips.</p> <p>Tip wrench with torque limiter.</p> <p>Compatible with 4/6 hole tubing.</p> |
| Applicable Standards       | ISO 18397: 2016.                                                                                                                                                                                               |
| Performance Specifications | Expected service life 10 years.                                                                                                                                                                                |
| Accessories                | Including all accessories.                                                                                                                                                                                     |
| Warranties                 | <p>2 years.</p> <p>Availability of spares guaranteed for 10 years.</p>                                                                                                                                         |
| Instructions to Suppliers  |                                                                                                                                                                                                                |
| Note to Procurement        |                                                                                                                                                                                                                |

| Catalogue Number | Item Name                                 | Available on Transversal Contract | Contract Number or Code |
|------------------|-------------------------------------------|-----------------------------------|-------------------------|
| PHC-E-186        | <b><i>Suction: dry, 2-4 surgeries</i></b> | In preparation                    |                         |

|                            |                                                                                                                                                                                                                                                                                              |
|----------------------------|----------------------------------------------------------------------------------------------------------------------------------------------------------------------------------------------------------------------------------------------------------------------------------------------|
| Functional Specifications  | <p>Fixed installation.</p> <p>Serve number of surgeries: 2-3.</p> <p>Output power: Single-phase, Approximately 1.8kW-5A, 50 Hz.</p> <p>Speed of motor: No less than 2800 rpm.</p> <p>Vacuum setting at approximately 170 mBar.</p> <p>Noise level without housing: No more than 65dB(A).</p> |
| Applicable Standards       | <p>ISO 10637:1999.</p> <p>ISO 22595-1:2006.</p>                                                                                                                                                                                                                                              |
| Performance Specifications | <p>Expected service life 15 years.</p>                                                                                                                                                                                                                                                       |
| Accessories                |                                                                                                                                                                                                                                                                                              |
| Warranties                 | <p>2 years.</p> <p>Availability of spares guaranteed for 10 years.</p>                                                                                                                                                                                                                       |
| Instructions to Suppliers  | <p>Installation should be carefully planned, in consultation with competent professionals in the field, as well as Provincial infrastructure officials.</p>                                                                                                                                  |
| Note to Procurement        |                                                                                                                                                                                                                                                                                              |

| Catalogue Number | Item Name                     | Available on Transversal Contract | Contract Number or Code |
|------------------|-------------------------------|-----------------------------------|-------------------------|
| PHC-E-187        | <b><i>Suction: mobile</i></b> | In preparation                    |                         |

|                            |                                                                                                                                                                                                                                                                                                                                                                                                                                                                                                                                                                                                                   |
|----------------------------|-------------------------------------------------------------------------------------------------------------------------------------------------------------------------------------------------------------------------------------------------------------------------------------------------------------------------------------------------------------------------------------------------------------------------------------------------------------------------------------------------------------------------------------------------------------------------------------------------------------------|
| Functional Specifications  | <p>A mobile suction unit for continuous utilisation in a dental surgery. The unit MUST have the following features:</p> <ul style="list-style-type: none"> <li>Mobile unit to be steered around chair and between surgeries</li> <li>Equipped with 4 double wheel castors, one per corner</li> <li>Designed for continuous service</li> <li>Capacity of canister: minimum 4l</li> <li>Canister to be emptied manually.</li> </ul> <p>Noise level: No more than 65dB(A).<br/> Dimensions: Approximately 550mm W, 350mm D, 750mm H.<br/> Net weight: Approximately 35kg.<br/> Gross weight: Approximately 40kg.</p> |
| Applicable Standards       |                                                                                                                                                                                                                                                                                                                                                                                                                                                                                                                                                                                                                   |
| Performance Specifications | Expected service life 15 years.                                                                                                                                                                                                                                                                                                                                                                                                                                                                                                                                                                                   |
| Accessories                |                                                                                                                                                                                                                                                                                                                                                                                                                                                                                                                                                                                                                   |
| Warranties                 | <p>2 years.</p> <p>Availability of spares guaranteed for 10 years.</p>                                                                                                                                                                                                                                                                                                                                                                                                                                                                                                                                            |
| Instructions to Suppliers  |                                                                                                                                                                                                                                                                                                                                                                                                                                                                                                                                                                                                                   |
| Note to Procurement        |                                                                                                                                                                                                                                                                                                                                                                                                                                                                                                                                                                                                                   |

| Catalogue Number | Item Name                                 | Available on Transversal Contract | Contract Number or Code |
|------------------|-------------------------------------------|-----------------------------------|-------------------------|
| PHC-E-188        | <b><i>Suction: wet, 2-4 surgeries</i></b> | In preparation                    |                         |

|                            |                                                                                                                                                                                                                                                                                                                                                                                                             |
|----------------------------|-------------------------------------------------------------------------------------------------------------------------------------------------------------------------------------------------------------------------------------------------------------------------------------------------------------------------------------------------------------------------------------------------------------|
| Functional Specifications  | <p>Fixed installation.</p> <p>Serve number of surgeries: 2-4.</p> <p>Output power: Single-phase, Approximately 1.7kW-9A.</p> <p>Maximum flow: No less than 820 l/min.</p> <p>Operating head for continuous service: Maximum 3300mm H2O.</p> <p>Average water consumption: Approximately 6 l/min.</p> <p>Piping pressure: Approximately 4 bar.</p> <p>Dimensions: Approximately 370mm W, 300mm D, 420mm.</p> |
| Applicable Standards       | <p>ISO 10637:1999.</p> <p>ISO 22595-1:2006.</p>                                                                                                                                                                                                                                                                                                                                                             |
| Performance Specifications | <p>Maximum flow: No less than 820 l/min.</p> <p>Operating head for continuous service: Maximum 3300mm H2O.</p> <p>Expected service life 15 years.</p>                                                                                                                                                                                                                                                       |
| Accessories                |                                                                                                                                                                                                                                                                                                                                                                                                             |
| Warranties                 | <p>2 years.</p> <p>Availability of spares guaranteed for 10 years.</p>                                                                                                                                                                                                                                                                                                                                      |
| Instructions to Suppliers  | <p>Installation should be carefully planned, in consultation with competent professionals in the field, as well as Provincial infrastructure officials.</p>                                                                                                                                                                                                                                                 |
| Note to Procurement        |                                                                                                                                                                                                                                                                                                                                                                                                             |

| Catalogue Number | Item Name                 | Available on Transversal Contract | Contract Number or Code |
|------------------|---------------------------|-----------------------------------|-------------------------|
| PHC-E-189        | <i>Ultrasonic cleaner</i> | In preparation                    |                         |

|                            |                                                                                                                                                                                                                                                                                                                                                                             |
|----------------------------|-----------------------------------------------------------------------------------------------------------------------------------------------------------------------------------------------------------------------------------------------------------------------------------------------------------------------------------------------------------------------------|
| Functional Specifications  | <p>An ultrasonic bath utilised for the cleaning of dental instruments prior to sterilisation. The unit shall have the following features:</p> <ul style="list-style-type: none"> <li>Minimum 4.5l tank (working capacity)</li> <li>Supplied with instrument basket</li> <li>Equipped with an integrated timer</li> <li>Integrated hinged lid</li> <li>SABS PLUG.</li> </ul> |
| Applicable Standards       |                                                                                                                                                                                                                                                                                                                                                                             |
| Performance Specifications | Expected service life 10 years.                                                                                                                                                                                                                                                                                                                                             |
| Accessories                | <p>Instrument basket – standard.</p> <p>Optional items:</p> <ul style="list-style-type: none"> <li>Basket</li> <li>Beaker</li> <li>Bur tray.</li> </ul>                                                                                                                                                                                                                     |
| Warranties                 | <p>1 year.</p> <p>Availability of spares guaranteed for 5 years.</p>                                                                                                                                                                                                                                                                                                        |
| Instructions to Suppliers  | Describe validation procedures, and recommended frequency of validation. Note any equipment/ consumables required, with cost.                                                                                                                                                                                                                                               |
| Note to Procurement        |                                                                                                                                                                                                                                                                                                                                                                             |

| Catalogue Number | Item Name                        | Available on Transversal Contract | Contract Number or Code |
|------------------|----------------------------------|-----------------------------------|-------------------------|
| PHC-E-191        | <b><i>Water distillation</i></b> | In preparation                    |                         |

|                            |                                                                                                                                                                                                                    |
|----------------------------|--------------------------------------------------------------------------------------------------------------------------------------------------------------------------------------------------------------------|
| Functional Specifications  | A desktop water distillation unit for dental autoclaves. The unit MUST have the following features:<br>Must be able to supply at least 4l of distilled water to supply different types of autoclaves<br>SABS Plug. |
| Applicable Standards       |                                                                                                                                                                                                                    |
| Performance Specifications | Expected service life 10 years.                                                                                                                                                                                    |
| Accessories                |                                                                                                                                                                                                                    |
| Warranties                 | 1 year.                                                                                                                                                                                                            |
| Instructions to Suppliers  | Full installation of the water distillation unit on delivery.                                                                                                                                                      |
| Note to Procurement        |                                                                                                                                                                                                                    |

| Catalogue Number | Item Name                         | Available on Transversal Contract | Contract Number or Code |
|------------------|-----------------------------------|-----------------------------------|-------------------------|
| PHC-E-192        | <b><i>X-ray: wall-mounted</i></b> | In preparation                    |                         |

|                            |                                                                                                                                                                                                                                                                                                                                                                                                                                                                                                                                                                                                                                                                                                                                             |
|----------------------------|---------------------------------------------------------------------------------------------------------------------------------------------------------------------------------------------------------------------------------------------------------------------------------------------------------------------------------------------------------------------------------------------------------------------------------------------------------------------------------------------------------------------------------------------------------------------------------------------------------------------------------------------------------------------------------------------------------------------------------------------|
| Functional Specifications  | <p>An X-ray unit for capturing intra-oral analogue and digital images (Floor and wall mounted options).<br/> The unit must be a wall mount type (with an option of a long arm).<br/> The tube head MUST be between 60kV to 70kV<br/> The unit must have a computerized timer with the following functions:<br/> Automatic setting of technique factors in mAs<br/> Object program selection<br/> Tooth type<br/> Patient size<br/> Manual override.</p> <p>The focal point of the unit MUST be from 0.4mm to 0.8mm.<br/> The power supply of the unit must be mounted on the unit.<br/> The unit MUST use a line voltage of 220VAC to 240VAC.<br/> The line frequency MUST be 50Hz.<br/> Analogue and digital.<br/> SABS Plug (2Phase).</p> |
| Applicable Standards       | IEC 80601-2-60: 2012.                                                                                                                                                                                                                                                                                                                                                                                                                                                                                                                                                                                                                                                                                                                       |
| Performance Specifications | Expected service life 15 years.                                                                                                                                                                                                                                                                                                                                                                                                                                                                                                                                                                                                                                                                                                             |
| Accessories                | Remote control – corded or cordless.                                                                                                                                                                                                                                                                                                                                                                                                                                                                                                                                                                                                                                                                                                        |
| Warranties                 | 10 years on arm.<br>5 years on X-ray tube.                                                                                                                                                                                                                                                                                                                                                                                                                                                                                                                                                                                                                                                                                                  |
| Instructions to Suppliers  | Installation should be carefully planned, in consultation with competent professionals in the field, as well as Provincial infrastructure officials. Positioning is critical for smooth workflow.<br>State wall load-bearing requirements.                                                                                                                                                                                                                                                                                                                                                                                                                                                                                                  |
| Note to Procurement        | This item must be procured together with a digital imaging plate and laptop/PC, unless it is already included in the offering.                                                                                                                                                                                                                                                                                                                                                                                                                                                                                                                                                                                                              |

| Catalogue Number | Item Name                                                       | Available on Transversal Contract | Contract Number or Code |
|------------------|-----------------------------------------------------------------|-----------------------------------|-------------------------|
| PHC-E-193        | <b><i>X-ray: Digital oral imaging plate with a computer</i></b> | In preparation                    |                         |

|                            |                                                                                                                                                                                                                                                                                                                                                                                                                                                                                                                                                                                                                                                                                                                                                                                                                                                                                                                                                                                                                                                                                                                                                                                                                                                                                                                                                                              |
|----------------------------|------------------------------------------------------------------------------------------------------------------------------------------------------------------------------------------------------------------------------------------------------------------------------------------------------------------------------------------------------------------------------------------------------------------------------------------------------------------------------------------------------------------------------------------------------------------------------------------------------------------------------------------------------------------------------------------------------------------------------------------------------------------------------------------------------------------------------------------------------------------------------------------------------------------------------------------------------------------------------------------------------------------------------------------------------------------------------------------------------------------------------------------------------------------------------------------------------------------------------------------------------------------------------------------------------------------------------------------------------------------------------|
| Functional Specifications  | <p>An X-ray system utilising plates for quick digitising of intra-oral images. The unit MUST have the following features:</p> <ul style="list-style-type: none"> <li>Must be compatible with AC and DC intra oral X-ray Units</li> <li>Software including implant module and implant archive</li> <li>Fast Ethernet connection. Must include all cabling and installation from the unit to the surgeries</li> <li>4 X imaging plate sets per unit (1 for every surgery) MUST be supplied and includes (per surgery):               <ul style="list-style-type: none"> <li>a. 2 x 22x33mm plates</li> <li>b. 2 X 24x40mm plates</li> <li>c. 5 X 31x41 mm plates</li> <li>d. 1 X 27x45mm plate</li> <li>e. 1 X storage box for plates</li> <li>f. 100 pieces of hygiene bags per size.</li> </ul> </li> </ul> <p>The unit must be provided with an up to date desktop/laptop computer with the following requirements:</p> <ul style="list-style-type: none"> <li>≥4GB Ram</li> <li>≥1TB Hard drive</li> <li>17 inch LED screen</li> <li>Software for processing all captured images</li> <li>A keyboard and mouse (cordless/cord)</li> <li>The unit MUST use a line voltage of 220VAC to 240VAC</li> <li>The line frequency MUST be 50Hz</li> <li>At least windows 10</li> <li>The unit must be free standing with height adjustment</li> <li>SABS Plug (2 Phase).</li> </ul> |
| Applicable Standards       |                                                                                                                                                                                                                                                                                                                                                                                                                                                                                                                                                                                                                                                                                                                                                                                                                                                                                                                                                                                                                                                                                                                                                                                                                                                                                                                                                                              |
| Performance Specifications | Expected service life 10 years.                                                                                                                                                                                                                                                                                                                                                                                                                                                                                                                                                                                                                                                                                                                                                                                                                                                                                                                                                                                                                                                                                                                                                                                                                                                                                                                                              |
| Accessories                |                                                                                                                                                                                                                                                                                                                                                                                                                                                                                                                                                                                                                                                                                                                                                                                                                                                                                                                                                                                                                                                                                                                                                                                                                                                                                                                                                                              |
| Warranties                 | <p>2 years.</p> <p>Spares availability guarantee 5 years. ISO 7493: 2006.</p>                                                                                                                                                                                                                                                                                                                                                                                                                                                                                                                                                                                                                                                                                                                                                                                                                                                                                                                                                                                                                                                                                                                                                                                                                                                                                                |
| Instructions to Suppliers  |                                                                                                                                                                                                                                                                                                                                                                                                                                                                                                                                                                                                                                                                                                                                                                                                                                                                                                                                                                                                                                                                                                                                                                                                                                                                                                                                                                              |
| Note to Procurement        | Procure suitable laptop/PC from available term contracts.                                                                                                                                                                                                                                                                                                                                                                                                                                                                                                                                                                                                                                                                                                                                                                                                                                                                                                                                                                                                                                                                                                                                                                                                                                                                                                                    |



# General equipment

## Building maintenance

| Catalogue Number | Item Name                   | Available on Transversal Contract | Contract Number or Code |
|------------------|-----------------------------|-----------------------------------|-------------------------|
| PHC-E-194        | <i><b>Allen key set</b></i> | No                                |                         |

|                            |                                                                                                                                                                                                              |
|----------------------------|--------------------------------------------------------------------------------------------------------------------------------------------------------------------------------------------------------------|
| Functional Specifications  | Drop forged steel. T-style Allen keys, with short Allen key of same size protruding from one end of the handle.<br>Sizes: 1.5, 2, 2.5, 3, 4, 5, 6, 8, 10 mm.<br>Spherical head preferred, but not essential. |
| Applicable Standards       | ANSI B18.3.2M-1979.                                                                                                                                                                                          |
| Performance Specifications | Expected service life 10 years.                                                                                                                                                                              |
| Accessories                |                                                                                                                                                                                                              |
| Warranties                 | 1 year.                                                                                                                                                                                                      |
| Instructions to Suppliers  |                                                                                                                                                                                                              |
| Note to Procurement        |                                                                                                                                                                                                              |

| Catalogue Number | Item Name                               | Available on Transversal Contract | Contract Number or Code |
|------------------|-----------------------------------------|-----------------------------------|-------------------------|
| PHC-E-195        | <b><i>Clamps: adjustable (pair)</i></b> | No                                |                         |

|                            |                                                                                                                                                                                                                                                                         |
|----------------------------|-------------------------------------------------------------------------------------------------------------------------------------------------------------------------------------------------------------------------------------------------------------------------|
| Functional Specifications  | F-style clamps, length of bar approximately 200mm, reach of jaws at least 60mm. Bar at least 5mm x 20mm. Serrated. No clutch levers.<br>Acme-threaded screw. Handle of solid wood or polyethylene.<br>Swivel head on lower jaw. Replaceable non-marring pads both jaws. |
| Applicable Standards       |                                                                                                                                                                                                                                                                         |
| Performance Specifications | Expected service life 10 years.                                                                                                                                                                                                                                         |
| Accessories                |                                                                                                                                                                                                                                                                         |
| Warranties                 | 1 year.                                                                                                                                                                                                                                                                 |
| Instructions to Suppliers  |                                                                                                                                                                                                                                                                         |
| Note to Procurement        |                                                                                                                                                                                                                                                                         |

| Catalogue Number | Item Name                     | Available on Transversal Contract | Contract Number or Code |
|------------------|-------------------------------|-----------------------------------|-------------------------|
| PHC-E-196        | <b><i>Drill, cordless</i></b> | No                                |                         |

|                            |                                                                                                                                                                                                                                                                                                                                                                     |
|----------------------------|---------------------------------------------------------------------------------------------------------------------------------------------------------------------------------------------------------------------------------------------------------------------------------------------------------------------------------------------------------------------|
| Functional Specifications  | <p>Cordless 18Volt drill, 2-speed with hammer-drill function.</p> <p>Lithium-ion battery – at least 2 amp-hours.</p> <p>Forward/reverse switch. Trigger-operated variable speed control. Gearbox least 2-speed, slide – or lever-selectable.</p> <p>Torque at least 15Nm. Adjustable clutch.</p> <p>No load speed on high: minimum 1500 rpm.</p> <p>Chuck 13mm.</p> |
| Applicable Standards       |                                                                                                                                                                                                                                                                                                                                                                     |
| Performance Specifications | Expected service life 10 years.                                                                                                                                                                                                                                                                                                                                     |
| Accessories                | Charge cord (with power cord). 2 batteries, robust carry case, accessory handle.                                                                                                                                                                                                                                                                                    |
| Warranties                 | 2 years.                                                                                                                                                                                                                                                                                                                                                            |
| Instructions to Suppliers  |                                                                                                                                                                                                                                                                                                                                                                     |
| Note to Procurement        |                                                                                                                                                                                                                                                                                                                                                                     |

| Catalogue Number | Item Name                   | Available on Transversal Contract | Contract Number or Code |
|------------------|-----------------------------|-----------------------------------|-------------------------|
| PHC-E-197        | <b><i>Drill bit set</i></b> | No                                |                         |

|                            |                                                                                                                                                                                        |
|----------------------------|----------------------------------------------------------------------------------------------------------------------------------------------------------------------------------------|
| Functional Specifications  | Set of good-quality drill bits, suitable for metal, wood and composite materials.<br>Sizes: 2-12 mm, in 0,5mm increments. Additionally three masonry bits in 6mm, 8mm, and 10mm sizes. |
| Applicable Standards       |                                                                                                                                                                                        |
| Performance Specifications |                                                                                                                                                                                        |
| Accessories                | Carry case.                                                                                                                                                                            |
| Warranties                 | N/A.                                                                                                                                                                                   |
| Instructions to Suppliers  |                                                                                                                                                                                        |
| Note to Procurement        |                                                                                                                                                                                        |

| Catalogue Number | Item Name                                                       | Available on Transversal Contract | Contract Number or Code |
|------------------|-----------------------------------------------------------------|-----------------------------------|-------------------------|
| PHC-E-069        | <b><i>Extension cable: electrical, general purpose, 3m</i></b>  | No                                |                         |
| PHC-E-070        | <b><i>Extension cable: electrical, general purpose, 5m</i></b>  | No                                |                         |
| PHC-E-071        | <b><i>Extension cable: electrical, general purpose, 10m</i></b> | No                                |                         |
| PHC-E-211        | <b><i>Extension cable: on reel, 20m</i></b>                     | No                                |                         |

|                            |                                                                                                                                                                                                                                                                                                                                                                                                                                                                                                                     |
|----------------------------|---------------------------------------------------------------------------------------------------------------------------------------------------------------------------------------------------------------------------------------------------------------------------------------------------------------------------------------------------------------------------------------------------------------------------------------------------------------------------------------------------------------------|
| Functional Specifications  | <p>3-core, 2,5mmsq per core. Moulded SABS compliant 15-A three pin plug one end, moulded double 3-pin 15A female socket connector at the other. Can be Janus type or flat connector. Live and neutral openings to be shuttered.</p> <p>Available in 3m, 5m, 10m lengths.</p> <p>The reel-mounted extension must have a retraction mechanism for coiling it back onto a reel, enclosed inside a plastic/metal container. The plastic/metal container must have at least two switched 15-amp three prong sockets.</p> |
| Applicable Standards       | Must meet or exceed SANS 1574.                                                                                                                                                                                                                                                                                                                                                                                                                                                                                      |
| Performance Specifications | 5-year design life.                                                                                                                                                                                                                                                                                                                                                                                                                                                                                                 |
| Accessories                | None.                                                                                                                                                                                                                                                                                                                                                                                                                                                                                                               |
| Warranties                 | 1 year.                                                                                                                                                                                                                                                                                                                                                                                                                                                                                                             |
| Instructions to Suppliers  | None.                                                                                                                                                                                                                                                                                                                                                                                                                                                                                                               |
| Note to Procurement        | None.                                                                                                                                                                                                                                                                                                                                                                                                                                                                                                               |

| Catalogue Number | Item Name                          | Available on Transversal Contract | Contract Number or Code |
|------------------|------------------------------------|-----------------------------------|-------------------------|
| PHC-E-078        | <b><i>File, flat, combined</i></b> | No                                |                         |

|                            |                                                                                                                                                                                  |
|----------------------------|----------------------------------------------------------------------------------------------------------------------------------------------------------------------------------|
| Functional Specifications  | <p>Forged hardened steel. Length about 350mm.</p> <p>Preferably Bastard Cut one face, Second Cut on other face.</p> <p>Complete with securely attached polypropylene handle.</p> |
| Applicable Standards       | SANS 1172: 2008.                                                                                                                                                                 |
| Performance Specifications | Expected service life 5 years.                                                                                                                                                   |
| Accessories                |                                                                                                                                                                                  |
| Warranties                 | 1 year.                                                                                                                                                                          |
| Instructions to Suppliers  |                                                                                                                                                                                  |
| Note to Procurement        |                                                                                                                                                                                  |

| Catalogue Number | Item Name                           | Available on Transversal Contract | Contract Number or Code |
|------------------|-------------------------------------|-----------------------------------|-------------------------|
| PHC-E-198        | <b><i>Foam cutter, electric</i></b> | No                                |                         |

|                            |                                                                                                                                                                                                              |
|----------------------------|--------------------------------------------------------------------------------------------------------------------------------------------------------------------------------------------------------------|
| Functional Specifications  | Electric foam cutter saw (not electric carving knife and not hot-wire types). Reciprocating twin blades. Depth of cut in foam 300mm. Power at least 350Watt. Must be suitable for left- or right-handed use. |
| Applicable Standards       | Double-insulated.                                                                                                                                                                                            |
| Performance Specifications | Expected service life 10 years.                                                                                                                                                                              |
| Accessories                | 1 set of blades.<br>Sole plate.<br>Blade guide.                                                                                                                                                              |
| Warranties                 | 2 years.<br>Spares availability 10 years.                                                                                                                                                                    |
| Instructions to Suppliers  |                                                                                                                                                                                                              |
| Note to Procurement        | Some manufacturers do not supply a blade guide as standard. Please ensure that a 300mm blade guide is included in the quote and pricing.                                                                     |

| Catalogue Number | Item Name                          | Available on Transversal Contract | Contract Number or Code |
|------------------|------------------------------------|-----------------------------------|-------------------------|
| PHC-E-199        | <b><i>Frying pan, electric</i></b> | No                                |                         |

|                            |                                                                                                                                                                                                                                                                                                                                          |
|----------------------------|------------------------------------------------------------------------------------------------------------------------------------------------------------------------------------------------------------------------------------------------------------------------------------------------------------------------------------------|
| Functional Specifications  | <p>For splint making in PHC facilities – size limited to upper-limb splints.</p> <p>Square/rectangular shape. At least 300x300mm, larger preferred. Depth not critical. On/off switch, detachable power cord with temperature control, pilot light. At least 1500 Watts.</p> <p>Non-stick coating preferred. Heat-resistant handles.</p> |
| Applicable Standards       |                                                                                                                                                                                                                                                                                                                                          |
| Performance Specifications | Expected service life 10 years.                                                                                                                                                                                                                                                                                                          |
| Accessories                |                                                                                                                                                                                                                                                                                                                                          |
| Warranties                 | 2 years preferred.                                                                                                                                                                                                                                                                                                                       |
| Instructions to Suppliers  |                                                                                                                                                                                                                                                                                                                                          |
| Note to Procurement        |                                                                                                                                                                                                                                                                                                                                          |



| Catalogue Number | Item Name                             | Available on Transversal Contract | Contract Number or Code |
|------------------|---------------------------------------|-----------------------------------|-------------------------|
| PHC-E-080        | <b><i>Funnel, plastic, medium</i></b> | No                                |                         |

|                            |                                                                                                                  |
|----------------------------|------------------------------------------------------------------------------------------------------------------|
| Functional Specifications  | Medium-sized plastic funnel with long spout (for adding oil to machines).<br>Must be oil- and solvent resistant. |
| Applicable Standards       |                                                                                                                  |
| Performance Specifications |                                                                                                                  |
| Accessories                |                                                                                                                  |
| Warranties                 | N/A.                                                                                                             |
| Instructions to Suppliers  |                                                                                                                  |
| Note to Procurement        |                                                                                                                  |

| Catalogue Number | Item Name                        | Available on Transversal Contract | Contract Number or Code |
|------------------|----------------------------------|-----------------------------------|-------------------------|
| PHC-E-081        | <b><i>Hacksaw, all-metal</i></b> | No                                |                         |

|                            |                                                                                                                                                                                                                                             |
|----------------------------|---------------------------------------------------------------------------------------------------------------------------------------------------------------------------------------------------------------------------------------------|
| Functional Specifications  | <p>Metal handle and frame.</p> <p>Alloy handle. Tempered steel frame, chrome-plated, wing-nut tensioning system.</p> <p>No lateral deflection of frame when under tension.</p> <p>Handle joined to frame with a recessed threaded bolt.</p> |
| Applicable Standards       | SANS 1219:2007.                                                                                                                                                                                                                             |
| Performance Specifications | Expected service life 10 years.                                                                                                                                                                                                             |
| Accessories                |                                                                                                                                                                                                                                             |
| Warranties                 | 1 year.                                                                                                                                                                                                                                     |
| Instructions to Suppliers  |                                                                                                                                                                                                                                             |
| Note to Procurement        |                                                                                                                                                                                                                                             |

| Catalogue Number | Item Name                              | Available on Transversal Contract | Contract Number or Code |
|------------------|----------------------------------------|-----------------------------------|-------------------------|
| PHC-E-082        | <b><i>Hacksaw blades, assorted</i></b> | No                                |                         |
|                  |                                        |                                   |                         |

|                            |                                                                                        |
|----------------------------|----------------------------------------------------------------------------------------|
| Functional Specifications  | Bi-metal blades, hardened teeth, 300mm length.<br>2 each in 18, 24, 32 teeth per inch. |
| Applicable Standards       | SANS 1219:2007.                                                                        |
| Performance Specifications |                                                                                        |
| Accessories                |                                                                                        |
| Warranties                 | N/A.                                                                                   |
| Instructions to Suppliers  |                                                                                        |
| Note to Procurement        |                                                                                        |

| Catalogue Number | Item Name                                       | Available on Transversal Contract | Contract Number or Code |
|------------------|-------------------------------------------------|-----------------------------------|-------------------------|
| PHC-E-072        | <b><i>Hammer: claw, approximately 450gm</i></b> | No                                |                         |
|                  |                                                 |                                   |                         |

|                            |                                                                                                                                                 |
|----------------------------|-------------------------------------------------------------------------------------------------------------------------------------------------|
| Functional Specifications  | Solid hickory wood or fibreglass handle inserted into head and locked with wedges.<br>Head: forged, smooth head, rip claw. Approximately 450gm. |
| Applicable Standards       | Wooden Handle: SANS 292:2017.<br>Head: SANS 387:2014.                                                                                           |
| Performance Specifications | Expected service life 5 years.                                                                                                                  |
| Accessories                |                                                                                                                                                 |
| Warranties                 | 2 year.                                                                                                                                         |
| Instructions to Suppliers  | None.                                                                                                                                           |
| Note to Procurement        | None.                                                                                                                                           |

| Catalogue Number | Item Name                        | Available on Transversal Contract | Contract Number or Code |
|------------------|----------------------------------|-----------------------------------|-------------------------|
| PHC-E-200        | <b>Hearing protector (muffs)</b> | No                                |                         |
|                  |                                  |                                   |                         |

|                            |                                                                                                                                                                                                                                                              |
|----------------------------|--------------------------------------------------------------------------------------------------------------------------------------------------------------------------------------------------------------------------------------------------------------|
| Functional Specifications  | Hearing protection while using power tools.<br>Over-the-ear style. Thickly-padded ear cushions to permit use with goggles and spectacles.<br>Padded head band, should swivel to allow over-the-head or behind-the-head use.<br>Cushions must be replaceable. |
| Applicable Standards       |                                                                                                                                                                                                                                                              |
| Performance Specifications | Must be cleanable and disinfectable.<br>Noise attenuation rating at least 27 decibels.<br>Expected service life 10 years.                                                                                                                                    |
| Accessories                |                                                                                                                                                                                                                                                              |
| Warranties                 | 1 year.                                                                                                                                                                                                                                                      |
| Instructions to Suppliers  |                                                                                                                                                                                                                                                              |
| Note to Procurement        |                                                                                                                                                                                                                                                              |

| Catalogue Number | Item Name                        | Available on Transversal Contract | Contract Number or Code |
|------------------|----------------------------------|-----------------------------------|-------------------------|
| PHC-E-201        | <b><i>Heat gun, electric</i></b> | No                                |                         |

|                            |                                                                                                                                             |
|----------------------------|---------------------------------------------------------------------------------------------------------------------------------------------|
| Functional Specifications  | Electric heat gun. Variable temperature and airflow approx. 300°C to 600°C.<br>Cool body. Must be able to stand upright for hands-free use. |
| Applicable Standards       | Double-insulated.                                                                                                                           |
| Performance Specifications | Expected service life 10 years.                                                                                                             |
| Accessories                | Various nozzles to concentrate or disperse flow of hot air.                                                                                 |
| Warranties                 | 2 years.                                                                                                                                    |
| Instructions to Suppliers  |                                                                                                                                             |
| Note to Procurement        |                                                                                                                                             |

| Catalogue Number | Item Name                      | Available on Transversal Contract | Contract Number or Code |
|------------------|--------------------------------|-----------------------------------|-------------------------|
| PHC-E-202        | <i><b>Jigsaw, electric</b></i> | No                                |                         |

|                            |                                                                                                                                                                         |
|----------------------------|-------------------------------------------------------------------------------------------------------------------------------------------------------------------------|
| Functional Specifications  | D-handle type jigsaw. Pendulum cutting action. Tool-free blade change. Blower function to keep cutting line free of sawdust. Minimum 600 Watts. Variable speed control. |
| Applicable Standards       | Double-insulated.                                                                                                                                                       |
| Performance Specifications | Expected service life 10 years.                                                                                                                                         |
| Accessories                |                                                                                                                                                                         |
| Warranties                 | 2 years.                                                                                                                                                                |
| Instructions to Suppliers  |                                                                                                                                                                         |
| Note to Procurement        |                                                                                                                                                                         |

| Catalogue Number | Item Name                        | Available on Transversal Contract | Contract Number or Code |
|------------------|----------------------------------|-----------------------------------|-------------------------|
| PHC-E-203        | <i><b>Jigsaw blades, set</b></i> | No                                |                         |

|                            |                                                                                                                                                                                                         |
|----------------------------|---------------------------------------------------------------------------------------------------------------------------------------------------------------------------------------------------------|
| Functional Specifications  | Set of jigsaw blades in holder. Bi-metal. At least one each Rip, crosscut, fine cut and scroll cut in wood. Two metal-cutting blades.                                                                   |
| Applicable Standards       |                                                                                                                                                                                                         |
| Performance Specifications |                                                                                                                                                                                                         |
| Accessories                |                                                                                                                                                                                                         |
| Warranties                 | N/A.                                                                                                                                                                                                    |
| Instructions to Suppliers  |                                                                                                                                                                                                         |
| Note to Procurement        | There are two commonly used type of jigsaw blade: T-shank and U-shank. Ensure that the type procured is compatible with the jigsaw procured. Tool-free jigsaws almost always accept only t-shank types. |



| Catalogue Number | Item Name                       | Available on Transversal Contract | Contract Number or Code |
|------------------|---------------------------------|-----------------------------------|-------------------------|
| PHC-E-068        | <b><i>Ladder: aluminium</i></b> | No                                |                         |

|                            |                                                                                                                                                                                                                                                                     |
|----------------------------|---------------------------------------------------------------------------------------------------------------------------------------------------------------------------------------------------------------------------------------------------------------------|
| Functional Specifications  | Heavy-duty Ladder to be manufactured from high grade aluminium. A-style ladder, with locking top hinges.<br>6 steps per side. Dual-purpose – can be used a 6-step double-sided A-frame, or 12-step single ladder.<br>Rust-proof Locking hinges.<br>Non-slip treads. |
| Applicable Standards       | SANS 1304-2:209 part 3.                                                                                                                                                                                                                                             |
| Performance Specifications | 10-year design life.<br>Working load 110 – 130kg.                                                                                                                                                                                                                   |
| Accessories                | None.                                                                                                                                                                                                                                                               |
| Warranties                 | 1 year.                                                                                                                                                                                                                                                             |
| Instructions to Suppliers  | None.                                                                                                                                                                                                                                                               |
| Note to Procurement        | None.                                                                                                                                                                                                                                                               |

| Catalogue Number | Item Name                             | Available on Transversal Contract | Contract Number or Code |
|------------------|---------------------------------------|-----------------------------------|-------------------------|
| PHC-E-204        | <b><i>Measuring rule, folding</i></b> | No                                |                         |
|                  |                                       |                                   |                         |

|                            |                                                                                                                                                                                                               |
|----------------------------|---------------------------------------------------------------------------------------------------------------------------------------------------------------------------------------------------------------|
| Functional Specifications  | Fibreglass or wood multi-section folding rule, hinged. Extended length approx. 2 metres, folded length approx. 12cm. Spring hinges, lock in extended and folded position.<br>Graduations imperial and metric. |
| Applicable Standards       |                                                                                                                                                                                                               |
| Performance Specifications | Expected service life 10 years.                                                                                                                                                                               |
| Accessories                |                                                                                                                                                                                                               |
| Warranties                 | 1 year.                                                                                                                                                                                                       |
| Instructions to Suppliers  |                                                                                                                                                                                                               |
| Note to Procurement        |                                                                                                                                                                                                               |

| Catalogue Number | Item Name         | Available on Transversal Contract | Contract Number or Code |
|------------------|-------------------|-----------------------------------|-------------------------|
| PHC-E-210        | <b>Multi-plug</b> | No                                |                         |

|                            |                                                                                                                                                                                                                                                                                                                                                                                                                                                                                                                                                                                                       |
|----------------------------|-------------------------------------------------------------------------------------------------------------------------------------------------------------------------------------------------------------------------------------------------------------------------------------------------------------------------------------------------------------------------------------------------------------------------------------------------------------------------------------------------------------------------------------------------------------------------------------------------------|
| Functional Specifications  | <p>Adaptor for connecting several electrical machines to a single wall power outlet.</p> <p>1,5 to 2m cable, ending in moulded SABS approved 15Amp plug.</p> <p>Multi-plug body to be made of robust plastic.</p> <p>Integral overload protection, with reset button/switch.</p> <p>Integral surge protector – replaceable if blown.</p> <p>At least 3 x 15 Amp individually switched outlets, with illuminated switches.</p> <p>At least three SANS 164-2 sockets.</p> <p>At least 1 USB 2Amp socket preferred.</p> <p>Either through holes or a rear snap-on bracket for mounting to a surface.</p> |
| Applicable Standards       | SANS 164, SANS 60884-1:2013.                                                                                                                                                                                                                                                                                                                                                                                                                                                                                                                                                                          |
| Performance Specifications | Expected service life 10 years.                                                                                                                                                                                                                                                                                                                                                                                                                                                                                                                                                                       |
| Accessories                | Bracket for wall-mounting, if applicable to model.                                                                                                                                                                                                                                                                                                                                                                                                                                                                                                                                                    |
| Warranties                 | 1 year.                                                                                                                                                                                                                                                                                                                                                                                                                                                                                                                                                                                               |
| Instructions to Suppliers  |                                                                                                                                                                                                                                                                                                                                                                                                                                                                                                                                                                                                       |
| Note to Procurement        |                                                                                                                                                                                                                                                                                                                                                                                                                                                                                                                                                                                                       |

| Catalogue Number | Item Name         | Available on Transversal Contract | Contract Number or Code |
|------------------|-------------------|-----------------------------------|-------------------------|
| PHC-E-077        | <b>Pliers set</b> | No                                |                         |

|                            |                                                                                                                                                                                                               |
|----------------------------|---------------------------------------------------------------------------------------------------------------------------------------------------------------------------------------------------------------|
| Functional Specifications  | 1 Long-nose pliers, 180mm serrated jaws.<br>1 combination pliers (lineman), 180mm.<br>1 side-cutter, 180mm.<br>1 slip-joint plier 180-200mm.<br>Forged steel, induction-hardened jaws. Non-slip rubber grips. |
| Applicable Standards       | SANS 1120: 2008.                                                                                                                                                                                              |
| Performance Specifications | Expected service life 10 years.                                                                                                                                                                               |
| Accessories                |                                                                                                                                                                                                               |
| Warranties                 | 1 year.                                                                                                                                                                                                       |
| Instructions to Suppliers  |                                                                                                                                                                                                               |
| Note to Procurement        |                                                                                                                                                                                                               |

| Catalogue Number | Item Name                  | Available on Transversal Contract | Contract Number or Code |
|------------------|----------------------------|-----------------------------------|-------------------------|
| PHC-E-083        | <i>Pruning saw, medium</i> | No                                |                         |

|                            |                                                                                                                  |
|----------------------------|------------------------------------------------------------------------------------------------------------------|
| Functional Specifications  | Metal bow saw, with lever-type tensioning system.<br>Carbon steel blade with large gullets for pruning wet wood. |
| Applicable Standards       | SANS 1284:2014.                                                                                                  |
| Performance Specifications | Expected service life 10 years.                                                                                  |
| Accessories                |                                                                                                                  |
| Warranties                 | 2 years on frame.                                                                                                |
| Instructions to Suppliers  |                                                                                                                  |
| Note to Procurement        |                                                                                                                  |

| Catalogue Number | Item Name                                        | Available on Transversal Contract | Contract Number or Code |
|------------------|--------------------------------------------------|-----------------------------------|-------------------------|
| PHC-E-084        | <b><i>Pruning shears, bypass, heavy-duty</i></b> | No                                |                         |
|                  |                                                  |                                   |                         |

|                            |                                                                                                                                                                                                                                                        |
|----------------------------|--------------------------------------------------------------------------------------------------------------------------------------------------------------------------------------------------------------------------------------------------------|
| Functional Specifications  | Heavy-duty by-pass type pruning shears. Approx. 200mm.<br>Adjustable lock-nut to control gap between blades.<br>Forged aluminium handles. Replaceable carbon-steel blades.<br>Spring self-opening mechanism. Sliding lock to hold the closed position. |
| Applicable Standards       |                                                                                                                                                                                                                                                        |
| Performance Specifications | Expected service life 5 years.                                                                                                                                                                                                                         |
| Accessories                | 1 spare set of blades and 1 spare spring.                                                                                                                                                                                                              |
| Warranties                 | 1 year.                                                                                                                                                                                                                                                |
| Instructions to Suppliers  |                                                                                                                                                                                                                                                        |
| Note to Procurement        |                                                                                                                                                                                                                                                        |

| Catalogue Number | Item Name                      | Available on Transversal Contract | Contract Number or Code |
|------------------|--------------------------------|-----------------------------------|-------------------------|
| PHC-E-205        | <b><i>Punch, revolving</i></b> | No                                |                         |

|                            |                                                                                                                                                                                                                                 |
|----------------------------|---------------------------------------------------------------------------------------------------------------------------------------------------------------------------------------------------------------------------------|
| Functional Specifications  | Heavy-duty revolving- head hole punch, for leather, webbing and other fabrics.<br>Non-slip grip. Forged steel body. Carbon steel hollow punches. Brass anvil.<br>Hole sizes 2,0, 2,5, 3.0, 3,5, 4,0, 4,5 mm. Edge margin 3,8mm. |
| Applicable Standards       |                                                                                                                                                                                                                                 |
| Performance Specifications | Expected service life 10 years.                                                                                                                                                                                                 |
| Accessories                |                                                                                                                                                                                                                                 |
| Warranties                 | 2 years.                                                                                                                                                                                                                        |
| Instructions to Suppliers  |                                                                                                                                                                                                                                 |
| Note to Procurement        |                                                                                                                                                                                                                                 |

| Catalogue Number | Item Name                   | Available on Transversal Contract | Contract Number or Code |
|------------------|-----------------------------|-----------------------------------|-------------------------|
| PHC-E-206        | <b><i>Punch, eyelet</i></b> | No                                |                         |
|                  |                             |                                   |                         |

|                            |                                                                              |
|----------------------------|------------------------------------------------------------------------------|
| Functional Specifications  | Combination single-hole punch and eyelet setting tool.<br>Self-opening jaws. |
| Applicable Standards       |                                                                              |
| Performance Specifications | Expected service life 10 years.                                              |
| Accessories                |                                                                              |
| Warranties                 |                                                                              |
| Instructions to Suppliers  |                                                                              |
| Note to Procurement        |                                                                              |



| Catalogue Number | Item Name                   | Available on Transversal Contract | Contract Number or Code |
|------------------|-----------------------------|-----------------------------------|-------------------------|
| PHC-E-156        | <b><i>Riveter, hand</i></b> | No                                |                         |

|                            |                                                                                                                                                                      |
|----------------------------|----------------------------------------------------------------------------------------------------------------------------------------------------------------------|
| Functional Specifications  | <p>Rolled steel or forged alloy handles, with plastic grips. 250mm.</p> <p>Hardened steel jaws. Hardened steel cross-pin.</p> <p>For aluminium and steel rivets.</p> |
| Applicable Standards       |                                                                                                                                                                      |
| Performance Specifications | Expected service life 10 years.                                                                                                                                      |
| Accessories                | Nozzles for 3,2mm and 4,8mm rivets (other sizes not essential).                                                                                                      |
| Warranties                 | 1 year.                                                                                                                                                              |
| Instructions to Suppliers  |                                                                                                                                                                      |
| Note to Procurement        |                                                                                                                                                                      |

| Catalogue Number | Item Name                            | Available on Transversal Contract | Contract Number or Code |
|------------------|--------------------------------------|-----------------------------------|-------------------------|
| PHC-E-086        | <b><i>Scraper, paint, medium</i></b> | No                                |                         |

|                            |                                                                                                                                                                 |
|----------------------------|-----------------------------------------------------------------------------------------------------------------------------------------------------------------|
| Functional Specifications  | Flexible tempered tool steel blade, approx. 35x 60mm Blade may be straight or flared.<br>Riveted wood or moulded polypropylene handle.<br>Rust-resistant steel. |
| Applicable Standards       |                                                                                                                                                                 |
| Performance Specifications |                                                                                                                                                                 |
| Accessories                |                                                                                                                                                                 |
| Warranties                 | N/A.                                                                                                                                                            |
| Instructions to Suppliers  |                                                                                                                                                                 |
| Note to Procurement        |                                                                                                                                                                 |

| Catalogue Number | Item Name                     | Available on Transversal Contract | Contract Number or Code |
|------------------|-------------------------------|-----------------------------------|-------------------------|
| PHC-E-073        | <b><i>Screwdriver set</i></b> | No                                |                         |

|                            |                                                                                                                                                                                                                                                                                              |
|----------------------------|----------------------------------------------------------------------------------------------------------------------------------------------------------------------------------------------------------------------------------------------------------------------------------------------|
| Functional Specifications  | 1 slotted head (flat) large, long-reach.<br>1 slotted head (flat) medium.<br>1 slotted head (flat) electrician.<br>1 slotted head (flat) stubby medium.<br>1 Philips No1.<br>1 Philips No2.<br>1 Pozidriv No 1.<br>1 Pozidriv No 2.<br>1 Square drive No 2.<br>Rubberised, non-slip handles. |
| Applicable Standards       | Slotted head: SANS 110:2013.<br>Others: SANS 8764-1:2009, SANS 8764-2:2009.                                                                                                                                                                                                                  |
| Performance Specifications | Rust-resistant.<br>Expected service life 5 years.                                                                                                                                                                                                                                            |
| Accessories                |                                                                                                                                                                                                                                                                                              |
| Warranties                 | 1 year.                                                                                                                                                                                                                                                                                      |
| Instructions to Suppliers  |                                                                                                                                                                                                                                                                                              |
| Note to Procurement        |                                                                                                                                                                                                                                                                                              |

| Catalogue Number | Item Name                                            | Available on Transversal Contract | Contract Number or Code |
|------------------|------------------------------------------------------|-----------------------------------|-------------------------|
| PHC-E-079        | <b><i>Sharpening stone, medium/fine combined</i></b> | No                                |                         |
|                  |                                                      |                                   |                         |

|                            |                                                                                                                                |
|----------------------------|--------------------------------------------------------------------------------------------------------------------------------|
| Functional Specifications  | Aluminium oxide rectangular sharpening stone, about 250x75mm.<br>One medium face, one fine face.<br>Oil or water as lubricant. |
| Applicable Standards       |                                                                                                                                |
| Performance Specifications | Expected service life 10 years.                                                                                                |
| Accessories                |                                                                                                                                |
| Warranties                 | 1 year.                                                                                                                        |
| Instructions to Suppliers  |                                                                                                                                |
| Note to Procurement        |                                                                                                                                |

| Catalogue Number | Item Name                                  | Available on Transversal Contract | Contract Number or Code |
|------------------|--------------------------------------------|-----------------------------------|-------------------------|
| PHC-E-074        | <b><i>Shifting spanner:<br/>0-40mm</i></b> | No                                |                         |
|                  |                                            |                                   |                         |

|                            |                                   |
|----------------------------|-----------------------------------|
| Functional Specifications  | Drop-forged hardened steel alloy. |
| Applicable Standards       | SANS 1211: 2007.                  |
| Performance Specifications | Expected service life 10 years.   |
| Accessories                |                                   |
| Warranties                 | 1 year.                           |
| Instructions to Suppliers  |                                   |
| Note to Procurement        |                                   |

| Catalogue Number | Item Name                      | Available on Transversal Contract | Contract Number or Code |
|------------------|--------------------------------|-----------------------------------|-------------------------|
| PHC-E-075        | <b>Swivel-head spanner set</b> | No                                |                         |
|                  |                                |                                   |                         |

|                            |                                                                                                                                                                    |
|----------------------------|--------------------------------------------------------------------------------------------------------------------------------------------------------------------|
| Functional Specifications  | Drop-forged chrome vanadium. Combination open-end and swivel head, serves most functions of a spanner and a socket wrench.<br>Metric sizes 8,10,13,14,17,19, 21mm. |
| Applicable Standards       | SANS 1112: 2008.                                                                                                                                                   |
| Performance Specifications | Expected service life 10 years.                                                                                                                                    |
| Accessories                |                                                                                                                                                                    |
| Warranties                 | 1 years.                                                                                                                                                           |
| Instructions to Suppliers  |                                                                                                                                                                    |
| Note to Procurement        |                                                                                                                                                                    |

| Catalogue Number | Item Name                                  | Available on Transversal Contract | Contract Number or Code |
|------------------|--------------------------------------------|-----------------------------------|-------------------------|
| PHC-E-207        | <b><i>Tape measure:<br/>industrial</i></b> |                                   |                         |
|                  |                                            |                                   |                         |

|                                 |                                                                                                         |
|---------------------------------|---------------------------------------------------------------------------------------------------------|
| Description                     | Retractable, industrial-duty tape measure, with metric and imperial markings. Blade 5m X 25mm.          |
| Use                             | For measuring, e.g. distance for standardized movement tests, height, wheelchair biometric assessments. |
| Clinical or User Specifications | Retract button should not jam after multiple uses.                                                      |
| Accessories                     | None.                                                                                                   |
| Care                            |                                                                                                         |
| Supplier Warranty               | 2 years (excluding deliberate or accidental damage).                                                    |

| Catalogue Number | Item Name              | Available on Transversal Contract | Contract Number or Code |
|------------------|------------------------|-----------------------------------|-------------------------|
| PHC-E-157        | <b><i>Tool box</i></b> | No                                |                         |

|                            |                                                                                                                                                                                                                                                                                                                                                                           |
|----------------------------|---------------------------------------------------------------------------------------------------------------------------------------------------------------------------------------------------------------------------------------------------------------------------------------------------------------------------------------------------------------------------|
| Functional Specifications  | <p>Heavy-duty all-metal construction. At least three tiers. Lower tiers may be pull-out drawers on ball-bearing slides, or the box may be of cantilevered design, where the lower tiers are exposed as the two halves of the top tier are moved apart.</p> <p>Closed-cell foam lining for each tier, to reduce noise and wear on the metal surfaces.</p> <p>Lockable.</p> |
| Applicable Standards       | None.                                                                                                                                                                                                                                                                                                                                                                     |
| Performance Specifications | Expected service life 5 years.                                                                                                                                                                                                                                                                                                                                            |
| Accessories                |                                                                                                                                                                                                                                                                                                                                                                           |
| Warranties                 | 1 year.                                                                                                                                                                                                                                                                                                                                                                   |
| Instructions to Suppliers  |                                                                                                                                                                                                                                                                                                                                                                           |
| Note to Procurement        |                                                                                                                                                                                                                                                                                                                                                                           |



| Catalogue Number | Item Name                                          | Available on Transversal Contract | Contract Number or Code |
|------------------|----------------------------------------------------|-----------------------------------|-------------------------|
| PHC-E-208        | <b><i>Utility knife,<br/>retractable blade</i></b> | No                                |                         |

|                            |                                                                                                                                                                           |
|----------------------------|---------------------------------------------------------------------------------------------------------------------------------------------------------------------------|
| Functional Specifications  | Utility knife (also known as box-cutter). Cast alloy or plastic non-folding body, ergonomic shape, blade storage in the handle. Length approx. 13cm. Non-snap-off blades. |
| Applicable Standards       |                                                                                                                                                                           |
| Performance Specifications | Expected service life 10 years.                                                                                                                                           |
| Accessories                | Box of 50 standard utility knife blades (non-snap-off).                                                                                                                   |
| Warranties                 | 1 year.                                                                                                                                                                   |
| Instructions to Suppliers  |                                                                                                                                                                           |
| Note to Procurement        |                                                                                                                                                                           |

| Catalogue Number | Item Name                                 | Available on Transversal Contract | Contract Number or Code |
|------------------|-------------------------------------------|-----------------------------------|-------------------------|
| PHC-E-085        | <b><i>Voltage tester, contactless</i></b> | No                                |                         |
|                  |                                           |                                   |                         |

|                            |                                                                                                                                                                                                                                                          |
|----------------------------|----------------------------------------------------------------------------------------------------------------------------------------------------------------------------------------------------------------------------------------------------------|
| Functional Specifications  | <p>Contactless voltage tester for safely determining presence of AC mains current in a wire, switch, outlet.</p> <p>50-300 V minimum range. At least 50-60Hz frequency.</p> <p>Insulated plastic body.</p> <p>Audible and visible voltage indicator.</p> |
| Applicable Standards       |                                                                                                                                                                                                                                                          |
| Performance Specifications | <p>Expected service life 10 years.</p>                                                                                                                                                                                                                   |
| Accessories                |                                                                                                                                                                                                                                                          |
| Warranties                 | <p>1 year.</p>                                                                                                                                                                                                                                           |
| Instructions to Suppliers  |                                                                                                                                                                                                                                                          |
| Note to Procurement        |                                                                                                                                                                                                                                                          |

| Catalogue Number | Item Name                       | Available on Transversal Contract | Contract Number or Code |
|------------------|---------------------------------|-----------------------------------|-------------------------|
| PHC-E-076        | <b><i>Water-pump pliers</i></b> | No                                |                         |

|                            |                                                                                                                   |
|----------------------------|-------------------------------------------------------------------------------------------------------------------|
| Functional Specifications  | Drop-forged chrome vanadium. Medium size. Serrated straight or curved jaws. Groove-joint. Nonslip coated handles. |
| Applicable Standards       | SANS 1120: 2008.                                                                                                  |
| Performance Specifications | Expected service life 5 years.                                                                                    |
| Accessories                |                                                                                                                   |
| Warranties                 | 1 year.                                                                                                           |
| Instructions to Suppliers  |                                                                                                                   |
| Note to Procurement        |                                                                                                                   |

| Catalogue Number | Item Name                                  | Available on Transversal Contract | Contract Number or Code |
|------------------|--------------------------------------------|-----------------------------------|-------------------------|
| PHC-E-209        | <b><i>Workbench, folding, portable</i></b> | No                                |                         |

|                            |                                                                                                                                                                                                                                                                                                                                                                                                                                                                                                                                                                                                                                                         |
|----------------------------|---------------------------------------------------------------------------------------------------------------------------------------------------------------------------------------------------------------------------------------------------------------------------------------------------------------------------------------------------------------------------------------------------------------------------------------------------------------------------------------------------------------------------------------------------------------------------------------------------------------------------------------------------------|
| Functional Specifications  | Powder-coated rolled or tubular metal frame, which can be opened or closed. When open, the frame is locked in position – positive action is needed to close the frame. The working surface (top) consists of two pieces of laminated board. One piece is fixed, the other can be moved backward and forward by rotating two cranked handles. The boards are drilled at intervals with 19mm holes, to accept plastic “bench dogs”. A workpiece can be laid flat on the top, and either clamped to the top with clamps, or secured between two sets of bench dogs. Work can also be clamped vertically between the boards, which function like vice jaws. |
| Applicable Standards       |                                                                                                                                                                                                                                                                                                                                                                                                                                                                                                                                                                                                                                                         |
| Performance Specifications | Expected service life 10 years.<br>The bench must support at least 75kg when open.                                                                                                                                                                                                                                                                                                                                                                                                                                                                                                                                                                      |
| Accessories                | Set of 4 plastic bench dogs.                                                                                                                                                                                                                                                                                                                                                                                                                                                                                                                                                                                                                            |
| Warranties                 | 1 year.                                                                                                                                                                                                                                                                                                                                                                                                                                                                                                                                                                                                                                                 |
| Instructions to Suppliers  |                                                                                                                                                                                                                                                                                                                                                                                                                                                                                                                                                                                                                                                         |
| Note to Procurement        |                                                                                                                                                                                                                                                                                                                                                                                                                                                                                                                                                                                                                                                         |

# Cleaning

| Catalogue Number | Item Name                      | Available on Transversal Contract | Contract Number or Code |
|------------------|--------------------------------|-----------------------------------|-------------------------|
| PHC-E-001        | <b><i>Bin: pedal, 4,5l</i></b> | No                                |                         |

|                            |                                                                                                                                                                                                                                                              |
|----------------------------|--------------------------------------------------------------------------------------------------------------------------------------------------------------------------------------------------------------------------------------------------------------|
| Functional Specifications  | <p>All stainless steel construction.</p> <p>No plastic in the lid-lifting mechanism.</p> <p>All levers to be secured in position with circlips or split pins.</p> <p>Usable with or without a liner.</p> <p>Noise-deadening bumpers to reduce lid noise.</p> |
| Applicable Standards       |                                                                                                                                                                                                                                                              |
| Performance Specifications | <p>At least 5000 lid openings.</p> <p>Standard cleaning and disinfectant solutions.</p>                                                                                                                                                                      |
| Accessories                |                                                                                                                                                                                                                                                              |
| Warranties                 | 2 years.                                                                                                                                                                                                                                                     |
| Instructions to Suppliers  |                                                                                                                                                                                                                                                              |
| Note to Procurement        |                                                                                                                                                                                                                                                              |

| Catalogue Number | Item Name                     | Available on Transversal Contract | Contract Number or Code |
|------------------|-------------------------------|-----------------------------------|-------------------------|
| PHC-E-002        | <b><i>Bin: pedal, 20l</i></b> | No                                |                         |

|                            |                                                                                                                                                                                                                                                              |
|----------------------------|--------------------------------------------------------------------------------------------------------------------------------------------------------------------------------------------------------------------------------------------------------------|
| Functional Specifications  | <p>All stainless steel construction.</p> <p>No plastic in the lid-lifting mechanism.</p> <p>All levers to be secured in position with circlips or split pins.</p> <p>Usable with or without a liner.</p> <p>Noise-deadening bumpers to reduce lid noise.</p> |
| Applicable Standards       |                                                                                                                                                                                                                                                              |
| Performance Specifications | <p>At least 10 000 lid openings.</p> <p>Standard cleaning and disinfectant solutions.</p>                                                                                                                                                                    |
| Accessories                |                                                                                                                                                                                                                                                              |
| Warranties                 | 2 years.                                                                                                                                                                                                                                                     |
| Instructions to Suppliers  |                                                                                                                                                                                                                                                              |
| Note to Procurement        |                                                                                                                                                                                                                                                              |

| Catalogue Number | Item Name                                                | Available on Transversal Contract | Contract Number or Code |
|------------------|----------------------------------------------------------|-----------------------------------|-------------------------|
| PHC-E-003        | <b><i>Bin: wall-mounted, refuse bag holding unit</i></b> | No                                |                         |

|                            |                                                                                                                                                                                                                                                                                                                                                                                                                                                                                                                                                                                  |
|----------------------------|----------------------------------------------------------------------------------------------------------------------------------------------------------------------------------------------------------------------------------------------------------------------------------------------------------------------------------------------------------------------------------------------------------------------------------------------------------------------------------------------------------------------------------------------------------------------------------|
| Functional Specifications  | <p>Consists of:</p> <p>White epoxy-coated wall bracket, pre-drilled for wall mounting</p> <p>Rectangular white epoxy-coated or rubberised metal frame, approximately 40cm wide x 35cm deep, securely attached to wall bracket, but offset sufficiently to allow plastic bag to be draped over complete circumference of frame</p> <p>Second frame, white epoxy-coated or chromed, to fit snugly over the mounted frame in order to secure the plastic refuse bag. Preferably should have a small lip to prevent slipping down. May be hinged to the inner ring, or separate.</p> |
| Applicable Standards       | SANS 778 paragraph 5.2, proof of compliance must be submitted.                                                                                                                                                                                                                                                                                                                                                                                                                                                                                                                   |
| Performance Specifications | <p>Must support weight of 40kg without deflection when mounted on wall.</p> <p>Cleanable with standard cleaning and disinfectant solutions.</p>                                                                                                                                                                                                                                                                                                                                                                                                                                  |
| Accessories                | All wall-mounting hardware (stainless steel screws).                                                                                                                                                                                                                                                                                                                                                                                                                                                                                                                             |
| Warranties                 | 2 years warranty.                                                                                                                                                                                                                                                                                                                                                                                                                                                                                                                                                                |
| Instructions to Suppliers  | Supplier to deliver and install.                                                                                                                                                                                                                                                                                                                                                                                                                                                                                                                                                 |
| Note to Procurement        |                                                                                                                                                                                                                                                                                                                                                                                                                                                                                                                                                                                  |

| Catalogue Number | Item Name                         | Available on Transversal Contract | Contract Number or Code |
|------------------|-----------------------------------|-----------------------------------|-------------------------|
| PHC-E-004        | <b><i>Bin: sanitary towel</i></b> | No                                |                         |

|                            |                                                                                                                                                        |
|----------------------------|--------------------------------------------------------------------------------------------------------------------------------------------------------|
| Functional Specifications  | <p>All stainless steel construction.</p> <p>Well-fitting, hinged lid.</p> <p>Wall-mounted, but can be floor-mounted, depending on space available.</p> |
| Applicable Standards       |                                                                                                                                                        |
| Performance Specifications | <p>At least 5 000 lid openings.</p> <p>Standard cleaning and disinfectant solutions.</p>                                                               |
| Accessories                | All wall-mounting hardware (stainless steel screws).                                                                                                   |
| Warranties                 | 2 years.                                                                                                                                               |
| Instructions to Suppliers  |                                                                                                                                                        |
| Note to Procurement        | Suitable plastic bag to be available for this item.                                                                                                    |



| Catalogue Number | Item Name                 | Available on Transversal Contract                            | Contract Number or Code |
|------------------|---------------------------|--------------------------------------------------------------|-------------------------|
| PHC-E-005        | <b><i>Bin: sharps</i></b> | No. Usually supplied by a waste management service provider. |                         |

|                            |                                                                                                                                                                                                                                                                                                                                               |
|----------------------------|-----------------------------------------------------------------------------------------------------------------------------------------------------------------------------------------------------------------------------------------------------------------------------------------------------------------------------------------------|
| Functional Specifications  | <p>Puncture-proof plastic (polypropylene), yellow with red contrast.</p> <p>Tamper-proof, leak-proof. Lid cannot be re-opened once closed.</p> <p>Spill-proof (entry port should not permit contents to fall out if the bin is knocked over).</p> <p>Labelled "Danger, contaminated sharps".</p> <p>International hazardous waste symbol.</p> |
| Applicable Standards       | SANS 452:2008.                                                                                                                                                                                                                                                                                                                                |
| Performance Specifications | <p>Cleanable with standard cleaning and disinfectant solutions.</p> <p>Must withstand Hot Water Wash (90°C).</p>                                                                                                                                                                                                                              |
| Accessories                | Bracket to hold securely to wall, pole or counter-top.                                                                                                                                                                                                                                                                                        |
| Warranties                 | 2 years.                                                                                                                                                                                                                                                                                                                                      |
| Instructions to Suppliers  | Ensure that a suitable supporting bracket is provided.                                                                                                                                                                                                                                                                                        |
| Note to Procurement        |                                                                                                                                                                                                                                                                                                                                               |

| Catalogue Number | Item Name                         | Available on Transversal Contract | Contract Number or Code |
|------------------|-----------------------------------|-----------------------------------|-------------------------|
| PHC-E-006        | <b><i>Broom: interior use</i></b> | No                                |                         |

|                            |                                                                                                                                                                                                                                                             |
|----------------------------|-------------------------------------------------------------------------------------------------------------------------------------------------------------------------------------------------------------------------------------------------------------|
| Functional Specifications  | Household broom. Head approx. 45cm wide. Long soft synthetic bristle.<br>Handle attached to head via metal fixing – not plastic threaded connector.<br>Handle solid wood or aluminium – not plastic-coated thin mild steel.<br>Robust hanging hook or hole. |
| Applicable Standards       | SANS 77:2008 wooden handles for brooms.                                                                                                                                                                                                                     |
| Performance Specifications |                                                                                                                                                                                                                                                             |
| Accessories                | None.                                                                                                                                                                                                                                                       |
| Warranties                 |                                                                                                                                                                                                                                                             |
| Instructions to Suppliers  |                                                                                                                                                                                                                                                             |
| Note to Procurement        | Reject if a magnet is attracted to the handle.                                                                                                                                                                                                              |

| Catalogue Number | Item Name                           | Available on Transversal Contract | Contract Number or Code |
|------------------|-------------------------------------|-----------------------------------|-------------------------|
| PHC-E-007        | <b><i>Buckets: colour-coded</i></b> | No                                |                         |

|                            |                                                                                                                                 |
|----------------------------|---------------------------------------------------------------------------------------------------------------------------------|
| Functional Specifications  | Medium-duty polypropylene buckets, approximately 20l.<br>Rectangular, with folding handle.<br>Colours: red, blue, green, black. |
| Applicable Standards       |                                                                                                                                 |
| Performance Specifications | Cleanable with standard cleaning and disinfectant solutions.<br>Chemical resistant.                                             |
| Accessories                |                                                                                                                                 |
| Warranties                 | 1 year.                                                                                                                         |
| Instructions to Suppliers  |                                                                                                                                 |
| Note to Procurement        | Size to fit janitor trolley.                                                                                                    |

| Catalogue Number | Item Name                            | Available on Transversal Contract | Contract Number or Code |
|------------------|--------------------------------------|-----------------------------------|-------------------------|
| PHC-E-010        | <b><i>Dust pan and brush set</i></b> | No                                |                         |

|                            |                                                                                                                                                                                            |
|----------------------------|--------------------------------------------------------------------------------------------------------------------------------------------------------------------------------------------|
| Functional Specifications  | Heavy-duty polypropylene dust pan, large size. Hanging hole in handle.<br>Heavy-duty soft-bristle plastic brush with handle. Hole in handle for hanging.<br>Domestic quality not suitable. |
| Applicable Standards       |                                                                                                                                                                                            |
| Performance Specifications | Cleanable with standard cleaning and disinfectant solutions.<br>Chemical resistant.                                                                                                        |
| Accessories                |                                                                                                                                                                                            |
| Warranties                 | 1 year.                                                                                                                                                                                    |
| Instructions to Suppliers  |                                                                                                                                                                                            |
| Note to Procurement        |                                                                                                                                                                                            |

| Catalogue Number | Item Name                | Available on Transversal Contract | Contract Number or Code |
|------------------|--------------------------|-----------------------------------|-------------------------|
| PHC-E-015        | <b><i>Mop: red</i></b>   | No                                |                         |
| PHC-E-016        | <b><i>Mop: blue</i></b>  | No                                |                         |
| PHC-E-017        | <b><i>Mop: black</i></b> | No                                |                         |
|                  |                          |                                   |                         |

|                            |                                                                                                                                                                          |
|----------------------------|--------------------------------------------------------------------------------------------------------------------------------------------------------------------------|
| Functional Specifications  | Standard wooden handle. Painted Red, Blue or Black. Non-chip, water-resistant paint.<br>Head: metal, rust-free. Long hair mop. Handle must attach to head-part securely. |
| Applicable Standards       | None.                                                                                                                                                                    |
| Performance Specifications |                                                                                                                                                                          |
| Accessories                | None.                                                                                                                                                                    |
| Warranties                 | 6 months.                                                                                                                                                                |
| Instructions to Suppliers  |                                                                                                                                                                          |
| Note to Procurement        | Procure equal numbers of the different colours.                                                                                                                          |

| Catalogue Number | Item Name                                | Available on Transversal Contract | Contract Number or Code |
|------------------|------------------------------------------|-----------------------------------|-------------------------|
| PHC-E-019        | <b><i>Mop: static head, complete</i></b> | No                                |                         |
|                  |                                          |                                   |                         |

|                            |                                                                                                                                                                                                                                                                                         |
|----------------------------|-----------------------------------------------------------------------------------------------------------------------------------------------------------------------------------------------------------------------------------------------------------------------------------------|
| Functional Specifications  | <p>Head 60cm wide. ABS/polypropylene base, aluminium frame.</p> <p>Microfiber sleeve, 60cm, washable.</p> <p>Handle approx. 1,2m long. Secure swivelling connection between head and handle.</p> <p>Solid wood or aluminium one-piece handle – not thin steel covered with plastic.</p> |
| Applicable Standards       | None.                                                                                                                                                                                                                                                                                   |
| Performance Specifications |                                                                                                                                                                                                                                                                                         |
| Accessories                | Microfibre sleeve for static head mop PHC-C-210.                                                                                                                                                                                                                                        |
| Warranties                 | 1 year.                                                                                                                                                                                                                                                                                 |
| Instructions to Suppliers  |                                                                                                                                                                                                                                                                                         |
| Note to Procurement        | Reject if a magnet is attracted to the handle.                                                                                                                                                                                                                                          |

| Catalogue Number | Item Name                                              | Available on Transversal Contract | Contract Number or Code |
|------------------|--------------------------------------------------------|-----------------------------------|-------------------------|
| PHC-E-020        | <b><i>Paper towel dispenser:<br/>folded towels</i></b> | RT 14-2016                        | 47131710-00003          |

|                            |                                                                                                                         |
|----------------------------|-------------------------------------------------------------------------------------------------------------------------|
| Functional Specifications  | Wall-mounted polycarbonate dispenser for folded paper towels.                                                           |
| Applicable Standards       |                                                                                                                         |
| Performance Specifications | Cleanable with standard cleaning and disinfectant solutions.<br>Chemical resistant.<br>Expected service life: 15 years. |
| Accessories                | All wall-mounting hardware (stainless steel screws).                                                                    |
| Warranties                 | 2 years on all components.                                                                                              |
| Instructions to Suppliers  | Supplier to deliver and install.                                                                                        |
| Note to Procurement        | Suitable folded paper towels available on RT 14 as Item 14111703-0003.                                                  |

| Catalogue Number | Item Name                                 | Available on Transversal Contract | Contract Number or Code |
|------------------|-------------------------------------------|-----------------------------------|-------------------------|
| PHC-E-021        | <b><i>Paper towel dispenser: roll</i></b> | No                                |                         |
|                  |                                           |                                   |                         |

|                            |                                                                                                                                                                                                                                                                                                                                                                                                                         |
|----------------------------|-------------------------------------------------------------------------------------------------------------------------------------------------------------------------------------------------------------------------------------------------------------------------------------------------------------------------------------------------------------------------------------------------------------------------|
| Functional Specifications  | <p>Dispenser of paper towels for drying hands.</p> <p>Stainless steel U-shaped metal frame minimum 3mm thickness, with stainless steel tubular cross-member, to take standard width perforated paper roller towels. Unit must accommodate large diameter rolls (not industrial sizes). Cross-member to have positive retaining system, to prevent slippage and displacement of roll. Pre-drilled for wall mounting.</p> |
| Applicable Standards       |                                                                                                                                                                                                                                                                                                                                                                                                                         |
| Performance Specifications | <p>Cleanable with standard cleaning and disinfectant solutions.</p> <p>Expected service life: 15 years.</p>                                                                                                                                                                                                                                                                                                             |
| Accessories                | All wall-mounting hardware (stainless steel screws).                                                                                                                                                                                                                                                                                                                                                                    |
| Warranties                 | 5 years on all components.                                                                                                                                                                                                                                                                                                                                                                                              |
| Instructions to Suppliers  | Supplier to deliver and install.                                                                                                                                                                                                                                                                                                                                                                                        |
| Note to Procurement        | Suitable folded paper towels available on RT 14 as Item 14111703-0003.                                                                                                                                                                                                                                                                                                                                                  |



| Catalogue Number | Item Name                    | Available on Transversal Contract | Contract Number or Code |
|------------------|------------------------------|-----------------------------------|-------------------------|
| PHC-E-014        | <i><b>Soap dispenser</b></i> | No                                |                         |
|                  |                              |                                   |                         |

|                            |                                                                                                                                                                                                                                                                                                                                                                                                                                                                                                          |
|----------------------------|----------------------------------------------------------------------------------------------------------------------------------------------------------------------------------------------------------------------------------------------------------------------------------------------------------------------------------------------------------------------------------------------------------------------------------------------------------------------------------------------------------|
| Functional Specifications  | <p>Simple, heavy-duty stainless steel cage-type unit, <b>without</b> hinged lever arm.</p> <p>Cage to be securely welded to stainless steel wall-mounting plate, with 3-4cm projection from front-surface of plate. May be canted forwards, for easier elbow access to pump mechanism on bottle.</p> <p>Cage must accept non-proprietary standard, replaceable refillable, pump bottles, approximately 65mm diameter, about 500ml volume.</p> <p>Mounting plate to be pre-drilled for wall mounting.</p> |
| Applicable Standards       |                                                                                                                                                                                                                                                                                                                                                                                                                                                                                                          |
| Performance Specifications | <p>Cleanable with standard cleaning and disinfectant solutions.</p> <p>Expected service life: 15 years.</p>                                                                                                                                                                                                                                                                                                                                                                                              |
| Accessories                | Two empty bottles. All wall-mounting hardware (stainless steel screws).                                                                                                                                                                                                                                                                                                                                                                                                                                  |
| Warranties                 | 5 years on metal components.                                                                                                                                                                                                                                                                                                                                                                                                                                                                             |
| Instructions to Suppliers  | Supplier to deliver and install.                                                                                                                                                                                                                                                                                                                                                                                                                                                                         |
| Note to Procurement        | Suitable bottles to be procured as spares, in series with this item.                                                                                                                                                                                                                                                                                                                                                                                                                                     |

| Catalogue Number | Item Name                         | Available on Transversal Contract | Contract Number or Code |
|------------------|-----------------------------------|-----------------------------------|-------------------------|
| PHC-E-022        | <b><i>Spray bottle: 750ml</i></b> | No                                |                         |

|                            |                                                                                                                                                                                                                                                                                    |
|----------------------------|------------------------------------------------------------------------------------------------------------------------------------------------------------------------------------------------------------------------------------------------------------------------------------|
| Functional Specifications  | <p>Simple trigger-action mechanism, on a robust plastic bottle.</p> <p>For use with bulk-purchased liquid detergents and window-cleaning solutions.</p> <p>Bottle should not be of the thin, transparent, blow-moulded type.</p> <p>Spray pattern is adjustable at the nozzle.</p> |
| Applicable Standards       | None.                                                                                                                                                                                                                                                                              |
| Performance Specifications |                                                                                                                                                                                                                                                                                    |
| Accessories                | None.                                                                                                                                                                                                                                                                              |
| Warranties                 |                                                                                                                                                                                                                                                                                    |
| Instructions to Suppliers  |                                                                                                                                                                                                                                                                                    |
| Note to Procurement        |                                                                                                                                                                                                                                                                                    |

| Catalogue Number | Item Name                      | Available on Transversal Contract | Contract Number or Code |
|------------------|--------------------------------|-----------------------------------|-------------------------|
| PHC-E-023        | <b><i>Spray bottle: 2l</i></b> | No                                |                         |

|                            |                                                                                                                                                                           |
|----------------------------|---------------------------------------------------------------------------------------------------------------------------------------------------------------------------|
| Functional Specifications  | Robust plastic bottle. Cap has a built-in pump to pressurise the bottle and its contents.<br>Trigger –activated spray release. Spray pattern is adjustable at the nozzle. |
| Applicable Standards       | None.                                                                                                                                                                     |
| Performance Specifications |                                                                                                                                                                           |
| Accessories                | None.                                                                                                                                                                     |
| Warranties                 |                                                                                                                                                                           |
| Instructions to Suppliers  |                                                                                                                                                                           |
| Note to Procurement        |                                                                                                                                                                           |

| Catalogue Number | Item Name                                | Available on Transversal Contract | Contract Number or Code |
|------------------|------------------------------------------|-----------------------------------|-------------------------|
| PHC-E-024        | <b><i>Spray bottle: 10l backpack</i></b> | No                                |                         |
|                  |                                          |                                   |                         |

|                            |                                                                                                                                                                                                                                                                                                                                                                                                                                                                                                                                                      |
|----------------------------|------------------------------------------------------------------------------------------------------------------------------------------------------------------------------------------------------------------------------------------------------------------------------------------------------------------------------------------------------------------------------------------------------------------------------------------------------------------------------------------------------------------------------------------------------|
| Functional Specifications  | <p>Heavy-duty plastic bottle, with harness for easy carrying in the user's back.</p> <p>Built in pump to pressurise the bottle and its contents. The pump may be built into the cap, or be lever-operated, for continuous use without removing from the carrying position.</p> <p>Pressure hose approx. 1m with a rigid non-rusting metal wand (aluminium or Stainless steel).</p> <p>The wand has a trigger release, and an adjustable spray nozzle.</p> <p>Generally used for application of weed-killer, insecticide or fertiliser solutions.</p> |
| Applicable Standards       | None.                                                                                                                                                                                                                                                                                                                                                                                                                                                                                                                                                |
| Performance Specifications |                                                                                                                                                                                                                                                                                                                                                                                                                                                                                                                                                      |
| Accessories                | Carrying harness.                                                                                                                                                                                                                                                                                                                                                                                                                                                                                                                                    |
| Warranties                 | 1 year.                                                                                                                                                                                                                                                                                                                                                                                                                                                                                                                                              |
| Instructions to Suppliers  |                                                                                                                                                                                                                                                                                                                                                                                                                                                                                                                                                      |
| Note to Procurement        |                                                                                                                                                                                                                                                                                                                                                                                                                                                                                                                                                      |

| Catalogue Number | Item Name       | Available on Transversal Contract | Contract Number or Code |
|------------------|-----------------|-----------------------------------|-------------------------|
| PHC-E-150        | <i>Squeegee</i> | No                                |                         |

|                            |                                                                                                                                                                                                                                                                                                                                                 |
|----------------------------|-------------------------------------------------------------------------------------------------------------------------------------------------------------------------------------------------------------------------------------------------------------------------------------------------------------------------------------------------|
| Functional Specifications  | <p>Double-sided aluminium headpiece, approx. 30cm wide. Replaceable live rubber edge on one side, replaceable cellulose sponge in gauze wrapper on the other.</p> <p>Handle: two-piece aluminium, telescopic. Locking mechanism must not allow head to rotate, in the extended or retracted positions.</p> <p>Extended length approx. 1,2m.</p> |
| Applicable Standards       | None.                                                                                                                                                                                                                                                                                                                                           |
| Performance Specifications |                                                                                                                                                                                                                                                                                                                                                 |
| Accessories                | Spare sponge and rubber edge.                                                                                                                                                                                                                                                                                                                   |
| Warranties                 | 1 year.                                                                                                                                                                                                                                                                                                                                         |
| Instructions to Suppliers  |                                                                                                                                                                                                                                                                                                                                                 |
| Note to Procurement        | Procure with one set of replacement parts. After replacing the rubber edge and sponge once, the whole squeegee should be replaced, so no spares are necessary for this item.                                                                                                                                                                    |

| Catalogue Number | Item Name                            | Available on Transversal Contract | Contract Number or Code |
|------------------|--------------------------------------|-----------------------------------|-------------------------|
| PHC-E-025        | <b><i>Dispenser: toilet roll</i></b> | RT 14-2016                        | 47131710-00000          |

|                            |                                                                                                              |
|----------------------------|--------------------------------------------------------------------------------------------------------------|
| Functional Specifications  | Wall-mounted, tamper-resistant toilet roll holder.<br>All stainless steel construction.<br>Capacity 2 rolls. |
| Applicable Standards       |                                                                                                              |
| Performance Specifications | Cleanable with standard cleaning and disinfectant solutions.<br>Expected service life: 15 years.             |
| Accessories                | All wall-mounting hardware (stainless steel screws).                                                         |
| Warranties                 | 2 years.                                                                                                     |
| Instructions to Suppliers  | Supplier to deliver and install.                                                                             |
| Note to Procurement        |                                                                                                              |

| Catalogue Number | Item Name                      | Available on Transversal Contract | Contract Number or Code |
|------------------|--------------------------------|-----------------------------------|-------------------------|
| PHC-E-030        | <b><i>Trolley: janitor</i></b> | No                                |                         |

|                            |                                                                                                                                                                                                                                                                                                                                                                                                                                                                                                                                                                                                                                                                                                                                                                                                                                                                                                                                                                                                                                                                                                                                                                                                                                                                                                                                                                                                                                                                                 |
|----------------------------|---------------------------------------------------------------------------------------------------------------------------------------------------------------------------------------------------------------------------------------------------------------------------------------------------------------------------------------------------------------------------------------------------------------------------------------------------------------------------------------------------------------------------------------------------------------------------------------------------------------------------------------------------------------------------------------------------------------------------------------------------------------------------------------------------------------------------------------------------------------------------------------------------------------------------------------------------------------------------------------------------------------------------------------------------------------------------------------------------------------------------------------------------------------------------------------------------------------------------------------------------------------------------------------------------------------------------------------------------------------------------------------------------------------------------------------------------------------------------------|
| Functional Specifications  | <p>The trolley holds a large refuse bag, held in the open position on the frame by a retainer. There is a sealing lid over the mouth of the bag, to prevent spillage and odours escaping.</p> <p>Alongside the receptacle are three shelves. The top shelf is sunken, to accommodate spray bottles and other containers. The middle and lower shelves are enclosed by a rail on all sides, and house cloths and brushes.</p> <p>The free edge of the top shelf has hooks or snap holders, into which mop handles can be secured when the unit is moving. Space for three mops (or mop/broom combinations).</p> <p>The floor of the trolley extends beyond the shelves, to provide a support for two heavy-duty buckets.</p> <p>The trolley is castor-mounted for easy movement into and out of rooms. The trolley shall be fitted with 75mm diameter castors.</p> <p>Castors must comply with the latest issue of SANS 621, proof of compliance must be submitted.</p> <p>Where castors are fitted into steel tubular legs, the tube shall be of wall thickness not less than 2,0mm and castors shall be fixed to the tube by one of the following methods:</p> <ol style="list-style-type: none"> <li>Solid plug (long) complying with SANS 621 subsection 3.5.6 or</li> <li>Screwed into 35mm long sleeves welded into the tubular members and locked in an acceptable manner</li> <li>Rubber or plastic expanding sleeves for fitting castors are not acceptable.</li> </ol> |
| Applicable Standards       | <p>SANS 778 paragraph 5.2, Proof of compliance must be submitted.</p> <p>To comply with SANS 896 specifications.</p> <p>SANS 621, proof of compliance must be submitted.</p>                                                                                                                                                                                                                                                                                                                                                                                                                                                                                                                                                                                                                                                                                                                                                                                                                                                                                                                                                                                                                                                                                                                                                                                                                                                                                                    |
| Performance Specifications | <p>Cleanable with standard cleaning and disinfectant solutions.</p> <p>Expected service life: 15 years for trolley body.</p>                                                                                                                                                                                                                                                                                                                                                                                                                                                                                                                                                                                                                                                                                                                                                                                                                                                                                                                                                                                                                                                                                                                                                                                                                                                                                                                                                    |
| Accessories                | Available separately as Cleaning Equipment and Cleaning Consumables.                                                                                                                                                                                                                                                                                                                                                                                                                                                                                                                                                                                                                                                                                                                                                                                                                                                                                                                                                                                                                                                                                                                                                                                                                                                                                                                                                                                                            |
| Warranties                 | 2 years.                                                                                                                                                                                                                                                                                                                                                                                                                                                                                                                                                                                                                                                                                                                                                                                                                                                                                                                                                                                                                                                                                                                                                                                                                                                                                                                                                                                                                                                                        |
| Instructions to Suppliers  |                                                                                                                                                                                                                                                                                                                                                                                                                                                                                                                                                                                                                                                                                                                                                                                                                                                                                                                                                                                                                                                                                                                                                                                                                                                                                                                                                                                                                                                                                 |
| Note to Procurement        | Replacement linen receptacle RT 24-12-029 in series with this item, to use interchangeably with, or to replace, original receptacle.                                                                                                                                                                                                                                                                                                                                                                                                                                                                                                                                                                                                                                                                                                                                                                                                                                                                                                                                                                                                                                                                                                                                                                                                                                                                                                                                            |

## Cold chain

| Catalogue Number | Item Name                                      | Available on Transversal Contract | Contract Number or Code |
|------------------|------------------------------------------------|-----------------------------------|-------------------------|
| PHC-E-035        | <b><i>Vaccine cooler box</i></b>               | No                                |                         |
| PHC-C-203        | <b><i>Water packs for vaccine cool box</i></b> | No                                |                         |

|                            |                                                                                                                                                                                                                                                                                                                                                         |
|----------------------------|---------------------------------------------------------------------------------------------------------------------------------------------------------------------------------------------------------------------------------------------------------------------------------------------------------------------------------------------------------|
| Functional Specifications  | <p>Specifications suitable for a cool box for a mixed outreach programme, or for use within a PHC facility.</p> <p>Material: external polyethylene, internal polyethylene or polystyrene, insulation polyurethane.</p> <p>Maximum external dimensions 30x30x30cm.</p> <p>Insulation thickness minimum 28mm.</p> <p>Storage volume approximately 2l.</p> |
| Applicable Standards       | Must comply with, and be pre-qualified on, WHO PQS E004 insulated containers. Proof to be supplied.                                                                                                                                                                                                                                                     |
| Performance Specifications | Cool life at 43° C: 24 hours.                                                                                                                                                                                                                                                                                                                           |
| Accessories                | <p>Adequate number of water packs to achieve cool life rating.</p> <p>2 sets of packs, to allow one set to be in use while the other is being chilled.</p> <p>Water packs for vaccine cooler box PHC-C-203.</p>                                                                                                                                         |
| Warranties                 | 2 years.                                                                                                                                                                                                                                                                                                                                                |
| Instructions to Suppliers  |                                                                                                                                                                                                                                                                                                                                                         |
| Note to Procurement        | <p>Replacement water packs to be procured in series with this item.</p> <p>There are 3 standard water pack sizes, depending on the type and size of cool box. If possible, standardise on one size, for ease of procurement. Do not purchase pre-filled water packs, as these may freeze the vaccine. Freezing destroys most vaccines.</p>              |



| Catalogue Number | Item Name                              | Available on Transversal Contract | Contract Number or Code |
|------------------|----------------------------------------|-----------------------------------|-------------------------|
| PHC-E-042        | <b><i>Data logging thermometer</i></b> | No                                |                         |

|                            |                                                                                                                                                                                                                                                                                                                                                                                                                                                                                                                                 |
|----------------------------|---------------------------------------------------------------------------------------------------------------------------------------------------------------------------------------------------------------------------------------------------------------------------------------------------------------------------------------------------------------------------------------------------------------------------------------------------------------------------------------------------------------------------------|
| Functional Specifications  | <p>To be installed outside, but next to, the refrigerator, with probe and cable of reasonable length to reach inside fridge.</p> <p>Must have a cradle or port for external communication/connectivity. In case of a cradle, one must be supplied per facility. In case of a port, the relevant connecting cable must be supplied, one per facility.</p> <p>Ideally has audible as well as visual alarm.</p> <p>Preferably automatically generates monthly report.</p>                                                          |
| Applicable Standards       | <p>Must comply with, and be pre-qualified on, WHO PQS E006/TH02 "User programmable temperature data logger multi-use" (proof to be supplied).</p>                                                                                                                                                                                                                                                                                                                                                                               |
| Performance Specifications | <p>Must store readings at pre-defined intervals, and keep readings for one month before over-writing.</p> <p>Must allow user to scroll through previous readings within the month.</p> <p>Display must indicate an alarm condition, if temperature boundaries have been exceeded.</p> <p>Must be cleanable and disinfectable with standard materials.</p> <p>Ideally, should be able to be connected via a network, to a central control location (provide details of connectivity and any hardware/software requirements).</p> |
| Accessories                | <p>Temperature probe.</p>                                                                                                                                                                                                                                                                                                                                                                                                                                                                                                       |
| Warranties                 | <p>2 years.</p>                                                                                                                                                                                                                                                                                                                                                                                                                                                                                                                 |
| Instructions to Suppliers  | <p>To be delivered with agreed standard configuration.</p> <p>Includes installation and training.</p> <p>If any specific hardware or software is required for downloading or reading stored readings or report, this must be supplied at no additional cost.</p>                                                                                                                                                                                                                                                                |
| Note to Procurement        | <p>The thermometer has a 2-year service life. Used with vaccine and medicine refrigerators. A 2-year planned replacement cycle must be catered for.</p>                                                                                                                                                                                                                                                                                                                                                                         |

| Catalogue Number | Item Name                                   | Available on Transversal Contract | Contract Number or Code |
|------------------|---------------------------------------------|-----------------------------------|-------------------------|
| PHC-E-153        | <b><i>Thermometer:<br/>refrigerator</i></b> | No                                |                         |

|                            |                                                                                                  |
|----------------------------|--------------------------------------------------------------------------------------------------|
| Functional Specifications  | Analogue bi-metal mechanism.<br>Stainless steel case, sealed.<br>Placed inside the refrigerator. |
| Applicable Standards       |                                                                                                  |
| Performance Specifications | At least -20°C to +20°C.<br>Non-rusting.                                                         |
| Accessories                |                                                                                                  |
| Warranties                 | 2 years.                                                                                         |
| Instructions to Suppliers  |                                                                                                  |
| Note to Procurement        |                                                                                                  |

| Catalogue Number | Item Name                      | Available on Transversal Contract | Contract Number or Code |
|------------------|--------------------------------|-----------------------------------|-------------------------|
| PHC-E-114        | <b><i>Room thermometer</i></b> | No                                |                         |

|                            |                                                                                                                                                                                    |
|----------------------------|------------------------------------------------------------------------------------------------------------------------------------------------------------------------------------|
| Functional Specifications  | <p>Wall-mounted electronic thermometer unit.</p> <p>Large LCD display showing maximum and minimum temperature.</p> <p>Powered by button cell or non-corrosive battery.</p>         |
| Applicable Standards       | None.                                                                                                                                                                              |
| Performance Specifications | <p>Sampling rate at least every hour.</p> <p>Preferably the day of week or date/time can be set.</p> <p>Re-set button for daily readings.</p> <p>Minimum battery life: 1 year.</p> |
| Accessories                | Mounting bracket or fixing for wall mounting. Must be detachable from wall for battery change.                                                                                     |
| Warranties                 | 2 years.                                                                                                                                                                           |
| Instructions to Suppliers  | None.                                                                                                                                                                              |
| Note to Procurement        | None.                                                                                                                                                                              |

## Fire safety

| Catalogue Number | Item Name                | Available on Transversal Contract | Contract Number or Code |
|------------------|--------------------------|-----------------------------------|-------------------------|
| PHC-E-043        | <b>Fire extinguisher</b> | No                                |                         |

|                            |                                                                                                                                                                                                                                                                                                                                                                                                                                     |
|----------------------------|-------------------------------------------------------------------------------------------------------------------------------------------------------------------------------------------------------------------------------------------------------------------------------------------------------------------------------------------------------------------------------------------------------------------------------------|
| Functional Specifications  | <p>Fire extinguisher must be suitable for Class A, B, and C fires.</p> <p>Type of extinguisher (water type, foam type, dry chemical powder type, or CO2 type) depends on the recommendation of the local fire department.</p> <p>Number and location of extinguishers is laid out in SANS 10400, but a fire extinguisher typically should be located within a 10m radius, and the radii of nearby extinguishers should overlap.</p> |
| Applicable Standards       | <p>SANS 10400 National Building Regulations.</p> <p>SANS 1910:2009 Portable refillable fire extinguishers.</p> <p>SANS 1567 CO2 fire extinguishers.</p> <p>SANS 10105-1 and SANS 1475-1 control, inspection and maintenance of fire extinguishers.</p>                                                                                                                                                                              |
| Performance Specifications | 4,5 kg size.                                                                                                                                                                                                                                                                                                                                                                                                                        |
| Accessories                | None.                                                                                                                                                                                                                                                                                                                                                                                                                               |
| Warranties                 | 2 years.                                                                                                                                                                                                                                                                                                                                                                                                                            |
| Instructions to Suppliers  | To be wall-mounted and signposted in accordance to SANS 10400.                                                                                                                                                                                                                                                                                                                                                                      |
| Note to Procurement        | <p>The inspection and maintenance of extinguishers is the responsibility of the owner of the building, after installation.</p> <p>Procurement of a maintenance contract is advisable.</p> <p>Extinguishers will have to be retired at some point – make provision for replacement.</p> <p>Note that where there is no mains water supply, several 9kg water type extinguishers may be required per floor.</p>                       |

| Catalogue Number | Item Name                       | Available on Transversal Contract | Contract Number or Code |
|------------------|---------------------------------|-----------------------------------|-------------------------|
| PHC-E-044        | <b><i>Fire hose on reel</i></b> | No                                |                         |

|                            |                                                                                                                                                                                                                                                                                                                                                       |
|----------------------------|-------------------------------------------------------------------------------------------------------------------------------------------------------------------------------------------------------------------------------------------------------------------------------------------------------------------------------------------------------|
| Functional Specifications  | <p>Reinforced fire-fighting hose, 30m, on rotating reel with hub attached to water supply.</p> <p>Hose complete with approved nozzle.</p> <p>Number of hoses required is determined by the fire loading of the building. Each hose can cover a maximum radius of its own length. The radiuses of hoses should overlap, to provide total coverage.</p> |
| Applicable Standards       | <p>Hose: SANS 1086 or EN694.</p> <p>Reel: SANS 543.</p> <p>Installation: SANS 10400 National Building Regulations Part W.</p> <p>SANS 10105-2: 2010.</p>                                                                                                                                                                                              |
| Performance Specifications | <p>Location, installation and testing, must be to the satisfaction of the Authority Having Jurisdiction (usually the local fire department).</p> <p>The hose and all couplings must comply with the burst rating for the intended use.</p>                                                                                                            |
| Accessories                | Fitted with approved nozzle.                                                                                                                                                                                                                                                                                                                          |
| Warranties                 | 2 years.                                                                                                                                                                                                                                                                                                                                              |
| Instructions to Suppliers  |                                                                                                                                                                                                                                                                                                                                                       |
| Note to Procurement        | Fire hoses have an increased risk of failure after a 10-year service life. A replacement programme should be in place.                                                                                                                                                                                                                                |

| Catalogue Number | Item Name                 | Available on Transversal Contract | Contract Number or Code |
|------------------|---------------------------|-----------------------------------|-------------------------|
| PHC-E-045        | <b><i>Smoke alarm</i></b> | No                                |                         |

|                            |                                                                                                                                                                                                                                                                                                                                                                                                                                                                                                                                                       |
|----------------------------|-------------------------------------------------------------------------------------------------------------------------------------------------------------------------------------------------------------------------------------------------------------------------------------------------------------------------------------------------------------------------------------------------------------------------------------------------------------------------------------------------------------------------------------------------------|
| Functional Specifications  | <p>Electronic ceiling-mounted, battery-operated unit, with low quiescent current and low battery drain.</p> <p>Detects smoke via opto-electronic sensor.</p> <p>Built-in electronic siren, approximately 110 dB.</p> <p>LED light(s) indicating active state and level of battery charge.</p> <p>Ideally should have radio frequency linkage between nearby units, such that if one unit is triggered, a nearby one also sounds the alarm, to maximise ability to attract attention.</p> <p>Replace battery when fire extinguishers are serviced.</p> |
| Applicable Standards       | None.                                                                                                                                                                                                                                                                                                                                                                                                                                                                                                                                                 |
| Performance Specifications |                                                                                                                                                                                                                                                                                                                                                                                                                                                                                                                                                       |
| Accessories                | Non-corrosive battery(ies).                                                                                                                                                                                                                                                                                                                                                                                                                                                                                                                           |
| Warranties                 | 2 years.                                                                                                                                                                                                                                                                                                                                                                                                                                                                                                                                              |
| Instructions to Suppliers  | Supplier to install. Ceiling mounting mechanism must permit easy battery replacement.                                                                                                                                                                                                                                                                                                                                                                                                                                                                 |
| Note to Procurement        | One unit per room that is closed off in normal use.                                                                                                                                                                                                                                                                                                                                                                                                                                                                                                   |

## Garden

| Catalogue Number | Item Name                                                        | Available on Transversal Contract | Contract Number or Code |
|------------------|------------------------------------------------------------------|-----------------------------------|-------------------------|
| PHC-E-046        | <b><i>Bin: general Waste, 240l, black, with wheels</i></b>       | No                                |                         |
| PHC-E-047        | <b><i>Bin: Healthcare Risk Waste, 140l, red, with wheels</i></b> | No                                |                         |
| PHC-E-048        | <b><i>Bin: general Waste, 140l, green, with wheels</i></b>       | No                                |                         |

|                            |                                                                                                                                                                                                                                              |
|----------------------------|----------------------------------------------------------------------------------------------------------------------------------------------------------------------------------------------------------------------------------------------|
| Functional Specifications  | <p>Mobile refuse bin.</p> <p>Thermoplastic material, colour black.</p> <p>Hinged lid.</p> <p>Nominal capacity 240l or 140l.</p> <p>Two wheels for manual handling.</p> <p>Handles for use with mechanical lifting and tilting equipment.</p> |
| Applicable Standards       | <p>SANS 1494: 2014(edition 2.00).</p> <p>SANS 1301: 2012.</p>                                                                                                                                                                                |
| Performance Specifications |                                                                                                                                                                                                                                              |
| Accessories                |                                                                                                                                                                                                                                              |
| Warranties                 | 2 years.                                                                                                                                                                                                                                     |
| Instructions to Suppliers  |                                                                                                                                                                                                                                              |
| Note to Procurement        |                                                                                                                                                                                                                                              |

| Catalogue Number | Item Name                   | Available on Transversal Contract | Contract Number or Code |
|------------------|-----------------------------|-----------------------------------|-------------------------|
| PHC-E-052        | <b><i>Broom: garden</i></b> | No                                |                         |

|                            |                                                          |
|----------------------------|----------------------------------------------------------|
| Functional Specifications  | Heavy -duty, large broom, wooden handle, stiff bristles. |
| Applicable Standards       | None available.                                          |
| Performance Specifications |                                                          |
| Accessories                | None.                                                    |
| Warranties                 | 1 year.                                                  |
| Instructions to Suppliers  | None.                                                    |
| Note to Procurement        | None.                                                    |



| Catalogue Number | Item Name                                            | Available on Transversal Contract | Contract Number or Code |
|------------------|------------------------------------------------------|-----------------------------------|-------------------------|
| PHC-E-050        | <b>Edge trimmer/brush cutter: petrol, heavy duty</b> | No                                |                         |

|                            |                                                                                                                                                                                                                                                                                                                                                                |
|----------------------------|----------------------------------------------------------------------------------------------------------------------------------------------------------------------------------------------------------------------------------------------------------------------------------------------------------------------------------------------------------------|
| Functional Specifications  | Professional-duty brush-cutter, 2-stroke petrol-driven, minimum 38 cc/1.6kW. To be supplied with blade, and interchangeable metal quick-load line head (non-plastic self-feeding type). Must be capable of extended operation – carburettor compensator or self-cleaning mechanism.                                                                            |
| Applicable Standards       | None.                                                                                                                                                                                                                                                                                                                                                          |
| Performance Specifications | Professional operation. Domestic models not suitable.                                                                                                                                                                                                                                                                                                          |
| Accessories                | Harness, safety glasses, hearing protectors, tool kit, manual.<br>Fuel mixing bottle.<br>100m recommended line.<br>Blade and line heads.                                                                                                                                                                                                                       |
| Warranties                 | Minimum 2 years, longer preferred. State expected MTBF.                                                                                                                                                                                                                                                                                                        |
| Instructions to Suppliers  | Specify price of all replaceable parts. Specify service types and intervals (user- and/or supplier-performed).<br>Supplier must deliver and train operators on use and maintenance.<br>Supplier to offer suitable steel wall-mounting bracket (to hold unit in vertical position).<br>Specify cost of annual service, and other available after-sales support. |
| Note to Procurement        | 2-stroke engine oil, spare filters and recommended blades and cutting line to be in series with this item.<br>Safety goggles and ear protectors also need frequent replacement.                                                                                                                                                                                |

| Catalogue Number | Item Name                                         | Available on Transversal Contract | Contract Number or Code |
|------------------|---------------------------------------------------|-----------------------------------|-------------------------|
| PHC-E-051        | <b><i>Extension cable: electrical, garden</i></b> | No                                |                         |
|                  |                                                   |                                   |                         |

|                            |                                                                                                                                                  |
|----------------------------|--------------------------------------------------------------------------------------------------------------------------------------------------|
| Functional Specifications  | 3-core, 2,5mmsq per core. 15m length, moulded SABs compliant 15-A three pin plug one end, moulded female CEE 7/3 (Shuko) connector at the other. |
| Applicable Standards       | Must meet or exceed SANS 1574; CEE 7/3.                                                                                                          |
| Performance Specifications | 5-year design life.                                                                                                                              |
| Accessories                | None.                                                                                                                                            |
| Warranties                 | 1 year.                                                                                                                                          |
| Instructions to Suppliers  | None.                                                                                                                                            |
| Note to Procurement        | None.                                                                                                                                            |

| Catalogue Number | Item Name                             | Available on Transversal Contract | Contract Number or Code |
|------------------|---------------------------------------|-----------------------------------|-------------------------|
| PHC-E-053        | <b><i>Fork: garden, 4-pronged</i></b> | No                                |                         |

|                            |                                                                            |
|----------------------------|----------------------------------------------------------------------------|
| Functional Specifications  | Heavy-duty, 4-pronged, garden fork.<br>All-steel construction. Steel grip. |
| Applicable Standards       | SANS 390:2013.                                                             |
| Performance Specifications |                                                                            |
| Accessories                | None.                                                                      |
| Warranties                 | 1 year.                                                                    |
| Instructions to Suppliers  | None.                                                                      |
| Note to Procurement        | None.                                                                      |

| Catalogue Number | Item Name                            | Available on Transversal Contract | Contract Number or Code |
|------------------|--------------------------------------|-----------------------------------|-------------------------|
| PHC-E-059        | <b><i>Gardening set: 3-piece</i></b> | No                                |                         |

|                            |                                                                                                                                                                                                |
|----------------------------|------------------------------------------------------------------------------------------------------------------------------------------------------------------------------------------------|
| Functional Specifications  | A set consisting of hand trowel, hand fork, and hand cultivator.<br>Heavy duty steel construction – flimsy domestic models not suitable.<br>Medium length solid wood or polypropylene handles. |
| Applicable Standards       | None.                                                                                                                                                                                          |
| Performance Specifications |                                                                                                                                                                                                |
| Accessories                | None.                                                                                                                                                                                          |
| Warranties                 | 2 years.                                                                                                                                                                                       |
| Instructions to Suppliers  | None.                                                                                                                                                                                          |
| Note to Procurement        | None.                                                                                                                                                                                          |

| Catalogue Number | Item Name                  | Available on Transversal Contract | Contract Number or Code |
|------------------|----------------------------|-----------------------------------|-------------------------|
| PHC-E-060        | <b><i>Hedge shears</i></b> | No                                |                         |

|                            |                                                                                                                                                                                                                             |
|----------------------------|-----------------------------------------------------------------------------------------------------------------------------------------------------------------------------------------------------------------------------|
| Functional Specifications  | Heavy-duty steel blades continuous with steel handle. Blades may be straight or wavy.<br>Hardened steel pivot bolt (self-locking nut).<br>Handle covers wood or moulded polyethylene or nylon. No hollow aluminium handles. |
| Applicable Standards       | None.                                                                                                                                                                                                                       |
| Performance Specifications |                                                                                                                                                                                                                             |
| Accessories                | None.                                                                                                                                                                                                                       |
| Warranties                 | 1 year.                                                                                                                                                                                                                     |
| Instructions to Suppliers  | None.                                                                                                                                                                                                                       |
| Note to Procurement        | None.                                                                                                                                                                                                                       |

| Catalogue Number | Item Name  | Available on Transversal Contract | Contract Number or Code |
|------------------|------------|-----------------------------------|-------------------------|
| PHC-E-061        | <b>Hoe</b> | No                                |                         |

|                            |                                                                                 |
|----------------------------|---------------------------------------------------------------------------------|
| Functional Specifications  | Heavy-duty hoe, preferably toothed for weed removal.<br>All-steel construction. |
| Applicable Standards       | None.                                                                           |
| Performance Specifications |                                                                                 |
| Accessories                | None.                                                                           |
| Warranties                 | 1 year.                                                                         |
| Instructions to Suppliers  | None.                                                                           |
| Note to Procurement        | None.                                                                           |

| Catalogue Number | Item Name                      | Available on Transversal Contract | Contract Number or Code |
|------------------|--------------------------------|-----------------------------------|-------------------------|
| PHC-E-062        | <b><i>Hosepipe: garden</i></b> | No                                |                         |

|                            |                                                                                                                                                                                                                                                                                                                                           |
|----------------------------|-------------------------------------------------------------------------------------------------------------------------------------------------------------------------------------------------------------------------------------------------------------------------------------------------------------------------------------------|
| Functional Specifications  | 20mm diameter, 50m length. Standard brass female connector for threaded bibcock (not plastic quick-connector), with reducer bushing for use with 15mm taps, good-quality worm-drive clamps, high-quality quick connector at other end for attachment to sprays and spouts. to be supplied with one high-quality multi-pattern spray head. |
| Applicable Standards       | SANS271:2005.                                                                                                                                                                                                                                                                                                                             |
| Performance Specifications | 10-year design life, non-twist, non-kink, ultra-violet resisitant.                                                                                                                                                                                                                                                                        |
| Accessories                | Tap connector, quick-connector, multi-pattern spray head, wall-mounted hose holder, spare washer kit, hose joiner (for mending), two good quality worm-drive clamps.                                                                                                                                                                      |
| Warranties                 | 1 year.                                                                                                                                                                                                                                                                                                                                   |
| Instructions to Suppliers  | The envisaged wall-mounted hose holder must be durable (epoxy-coated steel), simple, of open construction, to permit the hose to be loosely coiled, off the ground. No reels, trolleys or self-retracting mechanisms.                                                                                                                     |
| Note to Procurement        | A simple, wall-mounted powder-coated mild-steel hose holder (over which the hose can be coiled in loose loops), should be supplied with this item.                                                                                                                                                                                        |

| Catalogue Number | Item Name                                      | Available on Transversal Contract | Contract Number or Code |
|------------------|------------------------------------------------|-----------------------------------|-------------------------|
| PHC-E-063        | <b><i>Lawn mower: electric, heavy duty</i></b> | No                                |                         |
|                  |                                                |                                   |                         |

|                            |                                                                                                                                                                                                                                                                                                                                                             |
|----------------------------|-------------------------------------------------------------------------------------------------------------------------------------------------------------------------------------------------------------------------------------------------------------------------------------------------------------------------------------------------------------|
| Functional Specifications  | <p>Rotary type lawnmower with cutting diameter of approximately 400mm.</p> <p>Induction motor (not universal motor).</p> <p>Steel large diameter wheels with ball bearings (no plastic wheels with metal sleeve bearings).</p> <p>Chassis and body must be all-steel. Supplier to specify steel thickness. Grass catcher can be of durable ABS plastic.</p> |
| Applicable Standards       | <p>Must meet or exceed SANS 60335-2-77 (IEC 60335-2-77:1996, MOD).</p>                                                                                                                                                                                                                                                                                      |
| Performance Specifications | <p>Must be suitable for large area (up to 4 000m<sup>2</sup>).</p> <p>At least 3000 Watt input power.</p>                                                                                                                                                                                                                                                   |
| Accessories                | <p>Heavy duty replaceable 20metre cable with moulded male Shuko plug.</p> <p>Grass catcher box.</p> <p>User manual.</p>                                                                                                                                                                                                                                     |
| Warranties                 | <p>Minimum 2 years on motor, chassis, body, wheels (longer preferred). Damage and abuse excluded.</p>                                                                                                                                                                                                                                                       |
| Instructions to Suppliers  | <p>Specify price of all replaceable parts. Specify service types and intervals (user and/or supplier performed).</p> <p>Supplier must deliver to site and train operators on use and maintenance.</p> <p>Supplier must specify available after-sales support, with relevant pricing.</p>                                                                    |
| Note to Procurement        | <p>None.</p>                                                                                                                                                                                                                                                                                                                                                |



| Catalogue Number | Item Name                                   | Available on Transversal Contract | Contract Number or Code |
|------------------|---------------------------------------------|-----------------------------------|-------------------------|
| PHC-E-064        | <b><i>Lawnmower: petrol, heavy duty</i></b> | No                                |                         |

|                            |                                                                                                                                                                                                                                                                                                                                                                                                                                  |
|----------------------------|----------------------------------------------------------------------------------------------------------------------------------------------------------------------------------------------------------------------------------------------------------------------------------------------------------------------------------------------------------------------------------------------------------------------------------|
| Functional Specifications  | <p>4-wheel, non-self-propelled. 3-wheeler can be proposed if capable of smooth finish cut on lawn. Wheels must be steel, large diameter with ball-bearing hubs. All steel chassis and body. Supplier to document steel thickness.</p> <p>4-stroke engine, at least 6hp. Preferably snorkel type air cleaner. Will be used on premises exceeding 4000sq m, ground may be uneven.</p> <p>Grass box may be robust ABS or metal.</p> |
| Applicable Standards       | None.                                                                                                                                                                                                                                                                                                                                                                                                                            |
| Performance Specifications | Professional operation. Domestic models not suitable.                                                                                                                                                                                                                                                                                                                                                                            |
| Accessories                | <p>Safety glasses, hearing protectors, tool kit, manual.</p> <p>Spare air cleaner.</p> <p>Spare set of blades.</p> <p>Suitable metal petrol container, 10 – 15l, with sealing lid.</p>                                                                                                                                                                                                                                           |
| Warranties                 | Minimum 2 years (longer preferred). State expected MTBF.                                                                                                                                                                                                                                                                                                                                                                         |
| Instructions to Suppliers  | <p>Specify recommended grade of engine oil.</p> <p>Specify price of all replaceable parts.</p> <p>Specify service types and intervals (user and/or supplier performed).</p> <p>Supplier must deliver, fill engine oil and petrol, and train operators on use and maintenance.</p> <p>Specify cost of annual service, and other available after-sales support.</p>                                                                |
| Note to Procurement        | <p>Recommended grade of engine oil, spare filters and recommended blades to be in serial with this item.</p> <p>Safety goggles and ear protectors also need frequent replacement.</p>                                                                                                                                                                                                                                            |

| Catalogue Number | Item Name           | Available on Transversal Contract | Contract Number or Code |
|------------------|---------------------|-----------------------------------|-------------------------|
| PHC-E-065        | <b>Pick mattock</b> | No                                |                         |
|                  |                     |                                   |                         |

|                            |                                                                                                                      |
|----------------------------|----------------------------------------------------------------------------------------------------------------------|
| Functional Specifications  | Pick head mattock type: flat cutting blade at one end, and diamond point at other end.<br>Handle: plastic preferred. |
| Applicable Standards       | SANS 341:2007. If wooden handle, handle must comply with SANS 268:2015.                                              |
| Performance Specifications | Head weight approximately 2,3kg.                                                                                     |
| Accessories                | None.                                                                                                                |
| Warranties                 | 1 year on head and handle.                                                                                           |
| Instructions to Suppliers  | None.                                                                                                                |
| Note to Procurement        | None.                                                                                                                |

| Catalogue Number | Item Name                                      | Available on Transversal Contract | Contract Number or Code |
|------------------|------------------------------------------------|-----------------------------------|-------------------------|
| PHC-E-054        | <b><i>Rake: leaf and grass, heavy duty</i></b> | No                                |                         |

|                            |                                                                                                          |
|----------------------------|----------------------------------------------------------------------------------------------------------|
| Functional Specifications  | Heavy-duty, long-tooth rake, suitable for gathering leaves or lawn clippings.<br>All-steel construction. |
| Applicable Standards       | SANS 390:2013.                                                                                           |
| Performance Specifications |                                                                                                          |
| Accessories                | None.                                                                                                    |
| Warranties                 | 1 year.                                                                                                  |
| Instructions to Suppliers  | None.                                                                                                    |
| Note to Procurement        | None.                                                                                                    |

| Catalogue Number | Item Name                             | Available on Transversal Contract | Contract Number or Code |
|------------------|---------------------------------------|-----------------------------------|-------------------------|
| PHC-E-055        | <b><i>Rake: steel, heavy duty</i></b> | No                                |                         |

|                            |                                          |
|----------------------------|------------------------------------------|
| Functional Specifications  | Heavy-duty garden rake.<br>Steel handle. |
| Applicable Standards       | SANS 390:2013.                           |
| Performance Specifications |                                          |
| Accessories                | None.                                    |
| Warranties                 | 1 year.                                  |
| Instructions to Suppliers  | None.                                    |
| Note to Procurement        | None.                                    |

| Catalogue Number | Item Name                          | Available on Transversal Contract | Contract Number or Code |
|------------------|------------------------------------|-----------------------------------|-------------------------|
| PHC-E-056        | <b><i>Shovel: square mouth</i></b> | No                                |                         |

|                            |                                                                  |
|----------------------------|------------------------------------------------------------------|
| Functional Specifications  | Heavy-duty garden shovel.<br>All-steel construction. Steel grip. |
| Applicable Standards       | SANS 284:2013.                                                   |
| Performance Specifications |                                                                  |
| Accessories                | None.                                                            |
| Warranties                 | 1 year.                                                          |
| Instructions to Suppliers  | None.                                                            |
| Note to Procurement        | None.                                                            |

| Catalogue Number | Item Name             | Available on Transversal Contract | Contract Number or Code |
|------------------|-----------------------|-----------------------------------|-------------------------|
| PHC-E-057        | <i><b>Slasher</b></i> | No                                |                         |

|                            |                                                     |
|----------------------------|-----------------------------------------------------|
| Functional Specifications  | Tempered steel grass slasher. Wood or nylon handle. |
| Applicable Standards       | None.                                               |
| Performance Specifications |                                                     |
| Accessories                | None.                                               |
| Warranties                 | 1 year.                                             |
| Instructions to Suppliers  | None.                                               |
| Note to Procurement        | None.                                               |

| Catalogue Number | Item Name                   | Available on Transversal Contract | Contract Number or Code |
|------------------|-----------------------------|-----------------------------------|-------------------------|
| PHC-E-058        | <b><i>Spade, garden</i></b> | No                                |                         |

|                            |                                                                 |
|----------------------------|-----------------------------------------------------------------|
| Functional Specifications  | Heavy-duty garden spade.<br>All-steel construction. Steel grip. |
| Applicable Standards       | SANS 284:2013.                                                  |
| Performance Specifications |                                                                 |
| Accessories                | None.                                                           |
| Warranties                 | 1 year.                                                         |
| Instructions to Suppliers  | None.                                                           |
| Note to Procurement        | None.                                                           |

| Catalogue Number | Item Name                  | Available on Transversal Contract | Contract Number or Code |
|------------------|----------------------------|-----------------------------------|-------------------------|
| PHC-E-066        | <b><i>Watering can</i></b> | No                                |                         |

|                            |                                                                               |
|----------------------------|-------------------------------------------------------------------------------|
| Functional Specifications  | 10-15l, heavy-duty galvanised steel, with threaded spout and detachable rose. |
| Applicable Standards       | None.                                                                         |
| Performance Specifications | None.                                                                         |
| Accessories                | Threaded rose.                                                                |
| Warranties                 | 1 year.                                                                       |
| Instructions to Suppliers  | None.                                                                         |
| Note to Procurement        | None.                                                                         |



| Catalogue Number | Item Name          | Available on Transversal Contract | Contract Number or Code |
|------------------|--------------------|-----------------------------------|-------------------------|
| PHC-E-067        | <b>Wheelbarrow</b> | No                                |                         |

|                            |                                                                                                                                                                               |
|----------------------------|-------------------------------------------------------------------------------------------------------------------------------------------------------------------------------|
| Functional Specifications  | Heavy-duty concrete-type wheelbarrow, not DIY type.<br>Pan: metal preferred, but Polypropylene can be proposed.<br>Solid rubber wheel on steel rim.<br>Capacity: minimum 60l. |
| Applicable Standards       | SANS 795:2014 Type 4 or 5.                                                                                                                                                    |
| Performance Specifications | 5-year design life.                                                                                                                                                           |
| Accessories                | None.                                                                                                                                                                         |
| Warranties                 | 1 year.                                                                                                                                                                       |
| Instructions to Suppliers  | None.                                                                                                                                                                         |
| Note to Procurement        | None.                                                                                                                                                                         |

## Kitchen

| Catalogue Number | Item Name                      | Available on Transversal Contract | Contract Number or Code |
|------------------|--------------------------------|-----------------------------------|-------------------------|
| PHC-E-092        | <b><i>Kettle: electric</i></b> | No                                |                         |
|                  |                                |                                   |                         |

|                            |                                                                                                                                                                                                                                                                                                                                  |
|----------------------------|----------------------------------------------------------------------------------------------------------------------------------------------------------------------------------------------------------------------------------------------------------------------------------------------------------------------------------|
| Functional Specifications  | <p>All-stainless steel construction. Cordless, i.e. separate from base, which connects to power outlet via 1,5m cord with moulded 15A 3-pin SABS-approved plug.</p> <p>Separate lid, not hinged.</p> <p>Auto-shutoff. Boil-dry protection.</p> <p>Heating element enclosed in separate chamber.</p> <p>Rapid-boiling, 2000W.</p> |
| Applicable Standards       | SANS 60335 – applicable section.                                                                                                                                                                                                                                                                                                 |
| Performance Specifications | 5-year design life.                                                                                                                                                                                                                                                                                                              |
| Accessories                | None.                                                                                                                                                                                                                                                                                                                            |
| Warranties                 | 1 year.                                                                                                                                                                                                                                                                                                                          |
| Instructions to Suppliers  | None.                                                                                                                                                                                                                                                                                                                            |
| Note to Procurement        | None.                                                                                                                                                                                                                                                                                                                            |

| Catalogue Number | Item Name            | Available on Transversal Contract | Contract Number or Code |
|------------------|----------------------|-----------------------------------|-------------------------|
| PHC-E-093        | <b>Rack: dish</b>    | No                                |                         |
| PHC-E-094        | <b>Rack: cutlery</b> | No                                |                         |
|                  |                      |                                   |                         |

|                            |                                                                                       |
|----------------------------|---------------------------------------------------------------------------------------|
| Functional Specifications  | All-stainless steel construction. Countertop models, with stainless steel drip trays. |
| Applicable Standards       |                                                                                       |
| Performance Specifications | 5-year design life.                                                                   |
| Accessories                | None.                                                                                 |
| Warranties                 | 1 year.                                                                               |
| Instructions to Suppliers  | None.                                                                                 |
| Note to Procurement        | None.                                                                                 |

| Catalogue Number | Item Name            | Available on Transversal Contract | Contract Number or Code |
|------------------|----------------------|-----------------------------------|-------------------------|
| PHC-E-096        | <i>Urn: electric</i> | No                                |                         |

|                            |                                                                                                                                                                                                                                                                 |
|----------------------------|-----------------------------------------------------------------------------------------------------------------------------------------------------------------------------------------------------------------------------------------------------------------|
| Functional Specifications  | <p>All stainless steel construction.</p> <p>Thermostat to maintain water at desired temperature.</p> <p>Metal spigot tap preferred.</p> <p>Has safety cut-out and anti- boil dry. Pilot light.</p> <p>Power cord at least 1,5m with moulded 15A 3-pin plug.</p> |
| Applicable Standards       | SANS 60335 applicable sections.                                                                                                                                                                                                                                 |
| Performance Specifications | <p>At least 20 l capacity.</p> <p>5-year design life.</p>                                                                                                                                                                                                       |
| Accessories                |                                                                                                                                                                                                                                                                 |
| Warranties                 | 2 years.                                                                                                                                                                                                                                                        |
| Instructions to Suppliers  | <p>State available spare parts and after-sales support.</p> <p>State guaranteed minimum spares availability (years).</p>                                                                                                                                        |
| Note to Procurement        | None.                                                                                                                                                                                                                                                           |

| Catalogue Number | Item Name                                         | Available on Transversal Contract | Contract Number or Code |
|------------------|---------------------------------------------------|-----------------------------------|-------------------------|
| PHC-E-097        | <b><i>Watercooler: free-standing, bottled</i></b> | No                                |                         |

|                            |                                                                                                                                                                                                                                                                                                                                               |
|----------------------------|-----------------------------------------------------------------------------------------------------------------------------------------------------------------------------------------------------------------------------------------------------------------------------------------------------------------------------------------------|
| Functional Specifications  | <p>Free-standing floor-mounted unit.</p> <p>The unit accepts standard 15 – 20 l bottles.</p> <p>Dispenses cold water and room-temperature water via push-to-fill taps.</p> <p>Bottle preferably refillable without removing.</p> <p>Drip tray to prevent spillage onto floor.</p> <p>Power cord at least 2 m with moulded 15A 3-pin plug.</p> |
| Applicable Standards       | SANS 60335 applicable section.                                                                                                                                                                                                                                                                                                                |
| Performance Specifications | <p>Minimum 30 cups of cold water per hour.</p> <p>5-year design life.</p>                                                                                                                                                                                                                                                                     |
| Accessories                | Disposable paper cups PHC-C-164.                                                                                                                                                                                                                                                                                                              |
| Warranties                 | 2 years.                                                                                                                                                                                                                                                                                                                                      |
| Instructions to Suppliers  | <p>State available spare parts and after-sales support.</p> <p>State guaranteed minimum spares availability (years).</p> <p>State cost of 3-monthly sanitising.</p>                                                                                                                                                                           |
| Note to Procurement        | Obtain quote for 3-monthly sanitising service, and also optional kit for sanitising by own personnel.                                                                                                                                                                                                                                         |

## Miscellaneous

| Catalogue Number | Item Name                       | Available on Transversal Contract | Contract Number or Code |
|------------------|---------------------------------|-----------------------------------|-------------------------|
| PHC-E-159        | <b>Brazier bin: 105x135x75</b>  | No                                |                         |
| PHC-E-160        | <b>Brazier bin: 105x190x75</b>  | No                                |                         |
| PHC-E-161        | <b>Brazier bin: 140x210x130</b> | No                                |                         |
| PHC-E-162        | <b>Brazier bin: 140x280x130</b> | No                                |                         |

|                            |                                                                                                                                                                                                                          |
|----------------------------|--------------------------------------------------------------------------------------------------------------------------------------------------------------------------------------------------------------------------|
| Functional Specifications  | Open-top bins made of durable plastic, in range of colours and sizes.<br>Can be arranged side-by-side on shelves. Can attach to wall-mounting plate via lip on rear.<br>Front edge has a flat portion to accept a label. |
| Applicable Standards       |                                                                                                                                                                                                                          |
| Performance Specifications | 5-year design life.                                                                                                                                                                                                      |
| Accessories                |                                                                                                                                                                                                                          |
| Warranties                 | 2-year guarantee.                                                                                                                                                                                                        |
| Instructions to Suppliers  |                                                                                                                                                                                                                          |
| Note to Procurement        | Obtain quote for wall-mounting plate, in different sizes.                                                                                                                                                                |

| Catalogue Number | Item Name                 | Available on Transversal Contract | Contract Number or Code |
|------------------|---------------------------|-----------------------------------|-------------------------|
| PHC-E-099        | <b><i>Clock: wall</i></b> | No                                |                         |

|                            |                                                                                                                                                                                                                                                                                                                                                            |
|----------------------------|------------------------------------------------------------------------------------------------------------------------------------------------------------------------------------------------------------------------------------------------------------------------------------------------------------------------------------------------------------|
| Functional Specifications  | <p>250-300mm. diameter, round. Battery-operated. Quartz-regulated direct-drive or stepper motor.</p> <p>Body of high-impact plastic, with clear dial cover.</p> <p>Dial plate white with bold black Arabic numerals.</p> <p>Hour and minute hands black, sweep second hand may be black or red.</p> <p>Built-in screw-head retainer for wall-mounting.</p> |
| Applicable Standards       |                                                                                                                                                                                                                                                                                                                                                            |
| Performance Specifications | <p>Accuracy <math>\pm 5</math> sec per 24 hours.</p> <p>5-year design life.</p>                                                                                                                                                                                                                                                                            |
| Accessories                |                                                                                                                                                                                                                                                                                                                                                            |
| Warranties                 | 2 years.                                                                                                                                                                                                                                                                                                                                                   |
| Instructions to Suppliers  |                                                                                                                                                                                                                                                                                                                                                            |
| Note to Procurement        |                                                                                                                                                                                                                                                                                                                                                            |

| Catalogue Number | Item Name                                    | Available on Transversal Contract | Contract Number or Code |
|------------------|----------------------------------------------|-----------------------------------|-------------------------|
| PHC-E-100        | <b><i>Complaints and suggestions box</i></b> | No                                |                         |

|                            |                                                                                                                                                                                                                                                                                                                                                                                                                                                                                                                                                                                                                                                                                                                                                                                                                                                                                                                                                                                                                                                                                                                                                                                                                                                                                                                                                                               |
|----------------------------|-------------------------------------------------------------------------------------------------------------------------------------------------------------------------------------------------------------------------------------------------------------------------------------------------------------------------------------------------------------------------------------------------------------------------------------------------------------------------------------------------------------------------------------------------------------------------------------------------------------------------------------------------------------------------------------------------------------------------------------------------------------------------------------------------------------------------------------------------------------------------------------------------------------------------------------------------------------------------------------------------------------------------------------------------------------------------------------------------------------------------------------------------------------------------------------------------------------------------------------------------------------------------------------------------------------------------------------------------------------------------------|
| Functional Specifications  | <p>Backboard 420mm wideX530mm high.</p> <p>Attached to the backboard, aligned with the bottom and left edges, is a box with lid, 210mm wide X 230mm high X 113mm deep.</p> <p>The lid of the box is hinged at the back, and has a hasp-and-staple closure on the front. The lid can be recessed into the sidewalls of the box. Slit in lid for posting: 100mm X 10mm.</p> <p>To the right of the box, continuous with the front surface of the box, and aligned with the bottom and right edges of the backboard, is an unlidded box – storage space for forms. Box size is 210mm wide X 153mm high (i.e. shorter than closed box) X 113mm deep.</p> <p>Entire construction in white frosted sheet acrylic (Perspex<sup>®</sup>), 5mm thick.</p> <p>Hinges and closure stainless steel.</p> <p>Printing: Printed directly on the backboard (no adhesive labels).</p> <p>Top row: (font Arial 72) “Complaint, compliment and suggestion box”.</p> <p>2nd and 3rd rows: Repeat text translated into the two most prevalent languages in the Province.</p> <p>4th row: (font Arial 32) “Note: this box will be opened weekly”.</p> <p>Colour of printing to be determined by the Province, using Colour model CMYK.</p> <p>Lock: solid brass combination-wheel luggage-type lock.</p> <p>Must be mounted on wall. Bottom edge of backboard 1,2m above finished ground level.</p> |
| Applicable Standards       | None.                                                                                                                                                                                                                                                                                                                                                                                                                                                                                                                                                                                                                                                                                                                                                                                                                                                                                                                                                                                                                                                                                                                                                                                                                                                                                                                                                                         |
| Performance Specifications |                                                                                                                                                                                                                                                                                                                                                                                                                                                                                                                                                                                                                                                                                                                                                                                                                                                                                                                                                                                                                                                                                                                                                                                                                                                                                                                                                                               |
| Accessories                |                                                                                                                                                                                                                                                                                                                                                                                                                                                                                                                                                                                                                                                                                                                                                                                                                                                                                                                                                                                                                                                                                                                                                                                                                                                                                                                                                                               |
| Warranties                 | 6 months.                                                                                                                                                                                                                                                                                                                                                                                                                                                                                                                                                                                                                                                                                                                                                                                                                                                                                                                                                                                                                                                                                                                                                                                                                                                                                                                                                                     |
| Instructions to Suppliers  | Supply and install on wall, in location specified by the Operational Manager.                                                                                                                                                                                                                                                                                                                                                                                                                                                                                                                                                                                                                                                                                                                                                                                                                                                                                                                                                                                                                                                                                                                                                                                                                                                                                                 |
| Note to Procurement        |                                                                                                                                                                                                                                                                                                                                                                                                                                                                                                                                                                                                                                                                                                                                                                                                                                                                                                                                                                                                                                                                                                                                                                                                                                                                                                                                                                               |



| Catalogue Number | Item Name       | Available on Transversal Contract | Contract Number or Code |
|------------------|-----------------|-----------------------------------|-------------------------|
| PHC-E-101        | <b>Gun safe</b> | No                                |                         |

|                            |                                                                                                                                                                                                                                                                                                                                                                                                                                                                                                                                                                                                                                                                                                                                                                                                                                                                                                                                                                                                                                                                                                                                                                                                                                                                                                                                                                                                                                                                                                                                                                                                                                                                                                                                                                                                                                                                                                                                                                                                                                                                                                                                                                                                                                                                                                                                                             |
|----------------------------|-------------------------------------------------------------------------------------------------------------------------------------------------------------------------------------------------------------------------------------------------------------------------------------------------------------------------------------------------------------------------------------------------------------------------------------------------------------------------------------------------------------------------------------------------------------------------------------------------------------------------------------------------------------------------------------------------------------------------------------------------------------------------------------------------------------------------------------------------------------------------------------------------------------------------------------------------------------------------------------------------------------------------------------------------------------------------------------------------------------------------------------------------------------------------------------------------------------------------------------------------------------------------------------------------------------------------------------------------------------------------------------------------------------------------------------------------------------------------------------------------------------------------------------------------------------------------------------------------------------------------------------------------------------------------------------------------------------------------------------------------------------------------------------------------------------------------------------------------------------------------------------------------------------------------------------------------------------------------------------------------------------------------------------------------------------------------------------------------------------------------------------------------------------------------------------------------------------------------------------------------------------------------------------------------------------------------------------------------------------|
| Functional Specifications  | <p>Wall-mounted safe for storage of hand-guns.</p> <p>(a) <b>Material:</b> the construction of the safe shall be of mild steel of commercial (or higher) quality</p> <p>(b) <b>Side thickness:</b> the thickness of the floor, roof and sides shall be at least 2mm and the wall thickness of the door shall be at least 3mm.</p> <p>Specific requirements in respect of the design and construction of the doors of a safe referred to in this regulation, shall be the following:</p> <p>(a) <b>Openings:</b> When the door is closed, there shall not be an opening of more than 1mm between the door and the door-frame</p> <p>(b) <b>Door-frame:</b> If the hinges are concealed, the door-frame shall have a bended and welded construction with a reinforced rebate on three sides of the frame and in the case of hinges with a normal construction, the door-frame shall have a bended and welded construction with a reinforced rebate on all four sides of the frame. There shall be a protection guard (for instance a deflecting plate) to protect the lockpin</p> <p>(c) <b>Bolts:</b> When the door is closed and locked, it shall not noticeably move if force is exerted by hand or with the handle, and the intervening space between any bolt and the rebate shall not exceed 1mm. Doors of safes which are higher than 500mm shall be equipped with at least three bolts</p> <p>(d) <b>Hinges:</b> Doors shall have an upper and a lower hinge which shall be so constructed that the door may open through at least an angle of 100 degrees and that the distance between the hinges does not exceed 350mm</p> <p>(e) <b>Locks:</b> The safe door shall be equipped with one lever lock which shall have not less than ten levers of which not less than three shall be provided with false notches or a combination lock of the type which has three gears or an electronic lock which complies with the requirements approved of the South Africa Bureau of Standards.</p> <p>The safe shall to the satisfaction of the Commissioner:</p> <p>(a) be affixed flush to a floor, wall or other immovable structure or part thereof of the house, flat, residence or other dwelling place of an applicant concerned</p> <p>Requirement is for two non-identical locks – both need to be opened with separate keys, to open the safe.</p> |
| Applicable Standards       | <p>SANS953-1:2008.</p> <p>Fire Arm Control Act 60 of 2000. Compliance must be certified.</p>                                                                                                                                                                                                                                                                                                                                                                                                                                                                                                                                                                                                                                                                                                                                                                                                                                                                                                                                                                                                                                                                                                                                                                                                                                                                                                                                                                                                                                                                                                                                                                                                                                                                                                                                                                                                                                                                                                                                                                                                                                                                                                                                                                                                                                                                |
| Performance Specifications | <p>Resistance to attack as per SANS953-1:2008.</p> <p>15-year design life.</p>                                                                                                                                                                                                                                                                                                                                                                                                                                                                                                                                                                                                                                                                                                                                                                                                                                                                                                                                                                                                                                                                                                                                                                                                                                                                                                                                                                                                                                                                                                                                                                                                                                                                                                                                                                                                                                                                                                                                                                                                                                                                                                                                                                                                                                                                              |
| Accessories                | 2 sets of 2 keys.                                                                                                                                                                                                                                                                                                                                                                                                                                                                                                                                                                                                                                                                                                                                                                                                                                                                                                                                                                                                                                                                                                                                                                                                                                                                                                                                                                                                                                                                                                                                                                                                                                                                                                                                                                                                                                                                                                                                                                                                                                                                                                                                                                                                                                                                                                                                           |
| Warranties                 | 5-year guarantee.                                                                                                                                                                                                                                                                                                                                                                                                                                                                                                                                                                                                                                                                                                                                                                                                                                                                                                                                                                                                                                                                                                                                                                                                                                                                                                                                                                                                                                                                                                                                                                                                                                                                                                                                                                                                                                                                                                                                                                                                                                                                                                                                                                                                                                                                                                                                           |
| Instructions to Suppliers  | Supplier to install in collaboration with provincial technical personnel.                                                                                                                                                                                                                                                                                                                                                                                                                                                                                                                                                                                                                                                                                                                                                                                                                                                                                                                                                                                                                                                                                                                                                                                                                                                                                                                                                                                                                                                                                                                                                                                                                                                                                                                                                                                                                                                                                                                                                                                                                                                                                                                                                                                                                                                                                   |
| Note to Procurement        |                                                                                                                                                                                                                                                                                                                                                                                                                                                                                                                                                                                                                                                                                                                                                                                                                                                                                                                                                                                                                                                                                                                                                                                                                                                                                                                                                                                                                                                                                                                                                                                                                                                                                                                                                                                                                                                                                                                                                                                                                                                                                                                                                                                                                                                                                                                                                             |

| Catalogue Number | Item Name                    | Available on Transversal Contract | Contract Number or Code |
|------------------|------------------------------|-----------------------------------|-------------------------|
| PHC-E-102        | <b>Notice board: A3 size</b> | No                                |                         |
| PHC-E-103        | <b>Notice board: A2 size</b> | No                                |                         |
|                  |                              |                                   |                         |

|                            |                                                                                                                                                                                                                                                   |
|----------------------------|---------------------------------------------------------------------------------------------------------------------------------------------------------------------------------------------------------------------------------------------------|
| Functional Specifications  | <p>Anodised aluminium frame.</p> <p>Mounted direct to wall (not hung on cord).</p> <p>Fibreboard backing, faced with matt-finish polyester felt fabric.</p> <p>Dark blue, dark green or black.</p> <p>Fibreboard accepts chart pins securely.</p> |
| Applicable Standards       |                                                                                                                                                                                                                                                   |
| Performance Specifications | 5-year design life.                                                                                                                                                                                                                               |
| Accessories                | Wall-mounting hardware. Box of multi-coloured plastic push pins.                                                                                                                                                                                  |
| Warranties                 | 2 years.                                                                                                                                                                                                                                          |
| Instructions to Suppliers  | Installation by departmental technical personnel.                                                                                                                                                                                                 |
| Note to Procurement        |                                                                                                                                                                                                                                                   |

| Catalogue Number | Item Name                            | Available on Transversal Contract | Contract Number or Code |
|------------------|--------------------------------------|-----------------------------------|-------------------------|
| PHC-E-104        | <b><i>Pamphlet-holding boxes</i></b> | No                                |                         |

|                            |                                                                                                                                    |
|----------------------------|------------------------------------------------------------------------------------------------------------------------------------|
| Functional Specifications  | White backing board.<br>Individual clear acrylic pockets, to hold A4 size pamphlets or smaller.<br>2 horizontal rows of 4 pockets. |
| Applicable Standards       |                                                                                                                                    |
| Performance Specifications | 5-year design life.                                                                                                                |
| Accessories                | Wall-mounting hardware.                                                                                                            |
| Warranties                 | 2 years.                                                                                                                           |
| Instructions to Suppliers  | Installation by departmental technical personnel.                                                                                  |
| Note to Procurement        |                                                                                                                                    |

| Catalogue Number | Item Name                                 | Available on Transversal Contract | Contract Number or Code |
|------------------|-------------------------------------------|-----------------------------------|-------------------------|
| PHC-E-105        | <b>Poster display boards:<br/>A1 size</b> | No                                |                         |
| PHC-E-106        | <b>Poster display boards:<br/>A0 size</b> | No                                |                         |
|                  |                                           |                                   |                         |

|                            |                                                                                                                                                                                                    |
|----------------------------|----------------------------------------------------------------------------------------------------------------------------------------------------------------------------------------------------|
| Functional Specifications  | Anodised aluminium frame.<br>Mounted direct to wall (not hung on cord).<br>White hardboard backing. Poster adhere with double-sided tape.<br>Transparent vinyl sheet to protect surface of poster. |
| Applicable Standards       |                                                                                                                                                                                                    |
| Performance Specifications | 5-year design life.                                                                                                                                                                                |
| Accessories                | Wall-mounting hardware.                                                                                                                                                                            |
| Warranties                 | 2 years.                                                                                                                                                                                           |
| Instructions to Suppliers  | Installation by departmental technical personnel.                                                                                                                                                  |
| Note to Procurement        |                                                                                                                                                                                                    |

| Catalogue Number | Item Name                    | Available on Transversal Contract | Contract Number or Code |
|------------------|------------------------------|-----------------------------------|-------------------------|
| PHC-E-107        | <b>Whiteboard: 1200x1000</b> | No                                |                         |
| PHC-E-108        | <b>Whiteboard: 1800x1200</b> | No                                |                         |
| PHC-E-109        | <b>Whiteboard: 3000x1200</b> | No                                |                         |
|                  |                              |                                   |                         |

|                            |                                                                                                                                                                   |
|----------------------------|-------------------------------------------------------------------------------------------------------------------------------------------------------------------|
| Functional Specifications  | Anodised aluminium frame.<br>Mounted direct to wall (not hung on cord).<br>Magnetic white epoxy-coated sheet metal writing surface, with sound-deadening backing. |
| Applicable Standards       |                                                                                                                                                                   |
| Performance Specifications | 5-year design life.                                                                                                                                               |
| Accessories                | Wall-mounting hardware. Whiteboard felt eraser.                                                                                                                   |
| Warranties                 | 2 years.                                                                                                                                                          |
| Instructions to Suppliers  | Installation by departmental technical personnel.                                                                                                                 |
| Note to Procurement        |                                                                                                                                                                   |

# Furniture and appliances

## Clinical

| Catalogue Number | Item Name                                  | Available on Transversal Contract | Contract Number or Code |
|------------------|--------------------------------------------|-----------------------------------|-------------------------|
| PHC-F-025        | <b><i>Bassinet</i></b>                     | RT 24                             | RT 24-02-018            |
| PHC-F-026        | <b><i>Bassinet, plastic, spare</i></b>     | RT 24                             | RT 24-02-019            |
| PHC-F-027        | <b><i>Mattress for bassinet, spare</i></b> | RT 24                             | RT 24-02-021            |

|                            |                                                                                                                                                                                                                                                                                                                                                                                                                                  |
|----------------------------|----------------------------------------------------------------------------------------------------------------------------------------------------------------------------------------------------------------------------------------------------------------------------------------------------------------------------------------------------------------------------------------------------------------------------------|
| Functional Specifications  | <p>Bassinet, hospital, type A, with stand complete with mattress.</p> <p>To comply with the latest issue of CKS 237, type A</p> <p><b>Bassinet:</b> durable, transparent plastic material</p> <p>Mild steel frame with epoxy/nylon powder-coated finish to comply with SANS 778 paragraph 5.2, proof of compliance must be submitted</p> <p><b>Mattress:</b> Must be in accordance with item RT 24-02-021</p> <p>On castors.</p> |
| Applicable Standards       | <p>To comply with the latest issue of CKS 237, type A.</p> <p>SANS 778 paragraph 5.2, proof of compliance must be submitted.</p> <p>Castors shall be in accordance with SANS 621 (see Special Conditions).</p>                                                                                                                                                                                                                   |
| Performance Specifications | Expected service life of frame: 15 years.                                                                                                                                                                                                                                                                                                                                                                                        |
| Accessories                | None.                                                                                                                                                                                                                                                                                                                                                                                                                            |
| Warranties                 | 2 years on all components.                                                                                                                                                                                                                                                                                                                                                                                                       |
| Instructions to Suppliers  | None.                                                                                                                                                                                                                                                                                                                                                                                                                            |
| Note to Procurement        | Item RT 24-02-021 spare mattress and RT 24-02-021 spare mattress cover in series with this item.                                                                                                                                                                                                                                                                                                                                 |

| Catalogue Number | Item Name                              | Available on Transversal Contract | Contract Number or Code |
|------------------|----------------------------------------|-----------------------------------|-------------------------|
| PHC-F-072        | <b><i>Bed: hospital, 2-section</i></b> | RT24-2016                         | RT24-02-001             |

|                            |                                                                                                                                                                                                                                                                                                                                                                                                                                                                                                                                                                                                                                                                                                                                                                                                                                                                                                                                                                                                                                                                                                                                                                                                                       |
|----------------------------|-----------------------------------------------------------------------------------------------------------------------------------------------------------------------------------------------------------------------------------------------------------------------------------------------------------------------------------------------------------------------------------------------------------------------------------------------------------------------------------------------------------------------------------------------------------------------------------------------------------------------------------------------------------------------------------------------------------------------------------------------------------------------------------------------------------------------------------------------------------------------------------------------------------------------------------------------------------------------------------------------------------------------------------------------------------------------------------------------------------------------------------------------------------------------------------------------------------------------|
| Functional Specifications  | <p>Mild steel frame with epoxy/nylon powder coating colours: white, cream or grey.</p> <p>To be fitted with castors, two swivel, two locking.</p> <p>Removable head and foot ends (ABS material is acceptable).</p> <p>Mattress support: mattress support other than weldmesh is required, provide details.</p>                                                                                                                                                                                                                                                                                                                                                                                                                                                                                                                                                                                                                                                                                                                                                                                                                                                                                                       |
| Applicable Standards       | <p>To comply with the latest issue of SANS 521, in subsections 3.1 (a) and 5.1 (Type) of the latest issue of SANS 521 Note: where the item offered differs from the specification in SANS 521, the supplier must indicate the deviation and supply relevant details.</p> <p>Must comply with IEC 60601-2-52 (Particular requirements for basic safety and essential performance of medical beds) paragraphs: 201.1, 201.3, 201.7, 201.9, 201.13, 201.15, annex BB and annex CC.</p> <p>Epoxy/nylon powder-coated finish to comply with SANS 778 paragraph 5.2, proof of compliance must be submitted.</p> <p>Castors must comply with the latest issue of SANS 621, proof of compliance must be submitted. Where castors are fitted into steel tubular legs, the tube shall be of wall thickness not less than 2,0mm and castors shall be fixed to the tube by one of the following methods: a. Solid plug (long) complying with SANS 621 subsection 3.5.6 or b. Screwed into 35mm long sleeves welded into the tubular members and locked in an acceptable manner c. Rubber or plastic expanding sleeves for fitting castors are not acceptable.</p> <p>Collapsible safety sides, to comply with IEC 60601-2-52.</p> |
| Performance Specifications | <p>Bed must support a minimum patient mass of 180 kg. 200kg preferred. Adjustable backrest with gas spring assist, suitable for 100 kg patient.</p> <p>Bed must not disassemble if sides or ends are lifted – collapsible “emergency” beds are not fit for this purpose.</p>                                                                                                                                                                                                                                                                                                                                                                                                                                                                                                                                                                                                                                                                                                                                                                                                                                                                                                                                          |
| Accessories                | Complete with folding cot sides. Drip pole and patient lifting pole and strap optional.                                                                                                                                                                                                                                                                                                                                                                                                                                                                                                                                                                                                                                                                                                                                                                                                                                                                                                                                                                                                                                                                                                                               |
| Warranties                 | 2 years.                                                                                                                                                                                                                                                                                                                                                                                                                                                                                                                                                                                                                                                                                                                                                                                                                                                                                                                                                                                                                                                                                                                                                                                                              |
| Instructions to Suppliers  | Provide separate pricing for accessory drip pole, patient lifting pole and strap.                                                                                                                                                                                                                                                                                                                                                                                                                                                                                                                                                                                                                                                                                                                                                                                                                                                                                                                                                                                                                                                                                                                                     |
| Note to Procurement        | Item RT 24-02-021 spare mattress and RT 24-02-021 spare mattress cover in series with this item.                                                                                                                                                                                                                                                                                                                                                                                                                                                                                                                                                                                                                                                                                                                                                                                                                                                                                                                                                                                                                                                                                                                      |

| Catalogue Number | Item Name                             | Available on Transversal Contract | Contract Number or Code |
|------------------|---------------------------------------|-----------------------------------|-------------------------|
| PHC-F-073        | <b><i>Bed: hospital, mattress</i></b> | RT24-2016                         | RT24-02-014             |

|                            |                                                                                                                                                                                                                              |
|----------------------------|------------------------------------------------------------------------------------------------------------------------------------------------------------------------------------------------------------------------------|
| Functional Specifications  | To be constructed of flexible.<br>Overall dimensions: Length: 1 980 mm (-0 and +40mm) Width: 860 mm (-0 and +20mm) Thickness: 150 mm (-0 and +5mm).                                                                          |
| Applicable Standards       | Polyurethane foam complying with class 30, grade no.12 of SANS 640.<br>Overall to comply with the latest issue of SANS 640 AND 1291-1 (type 2), except for thickness indicated below. Proof of compliance must be submitted. |
| Performance Specifications | Mattress must support a minimum patient mass of 180 kg. 200kg preferred. Must resume original shape when not in use.<br>Mattress must be radio-translucent.                                                                  |
| Accessories                |                                                                                                                                                                                                                              |
| Warranties                 | 2 years.                                                                                                                                                                                                                     |
| Instructions to Suppliers  | Provide separate pricing for accessory drip pole, patient lifting pole and strap.                                                                                                                                            |
| Note to Procurement        | Must fit standard beds, must be in series with mattress cover PHC-F-074.                                                                                                                                                     |



| Catalogue Number | Item Name                                   | Available on Transversal Contract | Contract Number or Code |
|------------------|---------------------------------------------|-----------------------------------|-------------------------|
| PHC-F-074        | <b><i>Bed: hospital, mattress cover</i></b> | RT24-2016                         | RT24-02-015             |

|                            |                                                                                                                                                                                                                                                                                                       |
|----------------------------|-------------------------------------------------------------------------------------------------------------------------------------------------------------------------------------------------------------------------------------------------------------------------------------------------------|
| Functional Specifications  | Cover must be removable, water-resistant, air permeable material and radio-translucent.<br>Where a zip is incorporated, it shall be a heavy duty, large- toothed synthetic zip to allow removal of the inner mattress, totally covered by a flap extending over the zip to prevent ingress of fluids. |
| Applicable Standards       | To comply with the latest issue of SANS 1291-1, proof of compliance must be submitted.                                                                                                                                                                                                                |
| Performance Specifications |                                                                                                                                                                                                                                                                                                       |
| Accessories                |                                                                                                                                                                                                                                                                                                       |
| Warranties                 | 2 years.                                                                                                                                                                                                                                                                                              |
| Instructions to Suppliers  |                                                                                                                                                                                                                                                                                                       |
| Note to Procurement        |                                                                                                                                                                                                                                                                                                       |

| Catalogue Number | Item Name                              | Available on Transversal Contract | Contract Number or Code |
|------------------|----------------------------------------|-----------------------------------|-------------------------|
| PHC-F-029        | <b><i>Bed: hospital, obstetric</i></b> | RT 24                             | RT 24-02-009            |

|                           |                                                                                                                                                                                                                                                                                                                                                                                                                                                                                                                                                                                                                                                                                                                                                                                                                                                                                                                                                                                                                                                                                                                                                                                                                                                                                                                          |
|---------------------------|--------------------------------------------------------------------------------------------------------------------------------------------------------------------------------------------------------------------------------------------------------------------------------------------------------------------------------------------------------------------------------------------------------------------------------------------------------------------------------------------------------------------------------------------------------------------------------------------------------------------------------------------------------------------------------------------------------------------------------------------------------------------------------------------------------------------------------------------------------------------------------------------------------------------------------------------------------------------------------------------------------------------------------------------------------------------------------------------------------------------------------------------------------------------------------------------------------------------------------------------------------------------------------------------------------------------------|
| Functional Specifications | <p>Bed, hospital, obstetric, high-low, tilting, 2 section, complete with mattress.</p> <p>Bed and fittings must accommodate various labour and delivery positions</p> <p>Mild steel frame with epoxy/nylon powder-coated finish to comply with SANS 778 paragraph 5.2, proof of compliance must be submitted</p> <p>Epoxy/nylon powder coating colours: white, cream or grey</p> <p>Mattress platform material</p> <p>Removable leg section</p> <p>Adjustable backrest with gas spring assist (0 to 60 degrees) with quick release</p> <p>Controls at both sides of bed</p> <p>Hydraulically operated variable height operated by dual sided foot pedals</p> <p>Height range (mattress platform): 500 to 750mm (approximately)</p> <p>Trendelenburg tilt, 12 degrees</p> <p>To be fitted with 125mm castors with a central castor locking system</p> <p>Castors must comply with the latest issue of SANS 621, proof of compliance must be submitted</p> <p>Where castors are fitted into steel tubular legs, the tube shall be of wall thickness not less than 2,0mm, with collapsible safety sides, to comply with IEC 60601-2-52. Rubber buffer wheels at the corners of bed head end</p> <p>Mattress, two section, for body and foot sections, with cover. Body section must be suitable for all profile angles.</p> |
| Applicable Standards      | <p>Must comply with IEC 60601-2-52 (Particular requirements for basic safety and essential performance of medical beds) paragraphs: 201.1, 201.3, 201.7, 201.9, 201.13, 201.15, annex BB and annex CC.</p> <p>Epoxy/nylon powder-coated finish to comply with SANS 778 paragraph 5.2, proof of compliance must be submitted.</p> <p>Castors must comply with the latest issue of SANS 621, proof of compliance must be submitted.</p> <p>Collapsible safety sides, to comply with IEC 60601-2-52.</p> <p>Mattress to comply with the latest issue of SANS 640 AND 1291-1 (type 2), except for thickness, as below, proof of compliance must be submitted.</p> <p>Mattress To be constructed of flexible polyurethane foam complying with class 30, grade no.12 of SANS 640.</p>                                                                                                                                                                                                                                                                                                                                                                                                                                                                                                                                          |

|                            |                                                                                                                                                                                                                                                                                                                   |
|----------------------------|-------------------------------------------------------------------------------------------------------------------------------------------------------------------------------------------------------------------------------------------------------------------------------------------------------------------|
| Performance Specifications | <p>Expected service life minimum 10 years.</p> <p>Bed must support a patient mass of 180kg.</p> <p>Mattress must support a patient of at least 180kg and return to original shape when not in use.</p> <p>Thickness: 150mm (-0 and +5mm).</p> <p>Must be cleanable and disinfectable with standard solutions.</p> |
| Accessories                | <p>Two lithotomy poles, height adjustable, swivel action, with leg support (not straps).</p> <p>Douche fitting.</p> <p>Douche tray, stainless steel.</p> <p>Drip rod.</p>                                                                                                                                         |
| Warranties                 | <p>Manufacturer must supply a 5-year warranty on the mattress.</p>                                                                                                                                                                                                                                                |
| Instructions to Suppliers  | <p>None.</p>                                                                                                                                                                                                                                                                                                      |
| Note to Procurement        |                                                                                                                                                                                                                                                                                                                   |

| Catalogue Number | Item Name                           | Available on Transversal Contract | Contract Number or Code |
|------------------|-------------------------------------|-----------------------------------|-------------------------|
| PHC-F-033        | <b><i>Bucket for kick-about</i></b> | RT 24                             | RT 24-10-004            |
|                  |                                     |                                   |                         |

|                            |                                                                                                                                                                                           |
|----------------------------|-------------------------------------------------------------------------------------------------------------------------------------------------------------------------------------------|
| Functional Specifications  | <p>Bucket for kick-about.</p> <p>Stainless steel, with medium directional satin finish.</p>                                                                                               |
| Applicable Standards       | <p>To comply with the latest issue of CKS 294, Type B.</p> <p>Stainless steel must comply with the latest issue of SANS 417, subsection 4.1.2, proof of compliance must be submitted.</p> |
| Performance Specifications | <p>Service life minimum 10 years.</p> <p>Must be cleanable and disinfectable with standard solutions.</p>                                                                                 |
| Accessories                | None.                                                                                                                                                                                     |
| Warranties                 | 2 years on all components.                                                                                                                                                                |
| Instructions to Suppliers  | None.                                                                                                                                                                                     |
| Note to Procurement        | Item to be evaluated as series with item RT 24-10-003 in terms of paragraph 16.4 in the Special Conditions of Contract.                                                                   |

| Catalogue Number | Item Name                               | Available on Transversal Contract | Contract Number or Code |
|------------------|-----------------------------------------|-----------------------------------|-------------------------|
| PHC-F-069        | <b><i>Cabinet: medicine, mobile</i></b> | RT24-2016                         | RT24-04-003             |

|                            |                                                                                                                                                                                                                                                                                                                                                                                                                                                                                                                                                                                                                                                                                              |
|----------------------------|----------------------------------------------------------------------------------------------------------------------------------------------------------------------------------------------------------------------------------------------------------------------------------------------------------------------------------------------------------------------------------------------------------------------------------------------------------------------------------------------------------------------------------------------------------------------------------------------------------------------------------------------------------------------------------------------|
| Functional Specifications  | <p>Multi-drawer mobile medicine trolley, for use in a ward environment.</p> <p>Flat top surface, for writing and dispensing.</p> <p>Must have 4-6 drawers with adjustable dividers, 2 large storage drawers without dividers.</p> <p>Drawers must have smooth, durable sliding mechanism with stop to prevent total extraction of drawer.</p> <p>Mounted on 4 heavy duty swivel castors 125 mm diameter, the two front castors should be fitted with foot brakes with toe release mechanism.</p> <p>Approximate dimensions: Height: 950 mm Width: 750 mm Depth: 500 mm.</p> <p>Materials which are easily cleaned and of lasting finish, and low noise generating nature, shall be used.</p> |
| Applicable Standards       | <p>Castors must comply with SANS 621 and proof of compliance must be submitted. Castors must be antistatic. Where castors are fitted into steel tubular legs, the tube shall be of wall thickness not less than 2,0mm and castors shall be fixed to the tube by one of the following methods: a. Solid plug (long) complying with SANS 621 subsection 3.5.6 or b. Screwed into 35mm long sleeves welded into the tubular members and locked in an acceptable manner c. Rubber or plastic expanding sleeves for fitting castors are not acceptable.</p>                                                                                                                                       |
| Performance Specifications |                                                                                                                                                                                                                                                                                                                                                                                                                                                                                                                                                                                                                                                                                              |
| Accessories                | <p>Drawer dividers.</p>                                                                                                                                                                                                                                                                                                                                                                                                                                                                                                                                                                                                                                                                      |
| Warranties                 | <p>2 years.</p>                                                                                                                                                                                                                                                                                                                                                                                                                                                                                                                                                                                                                                                                              |
| Instructions to Suppliers  |                                                                                                                                                                                                                                                                                                                                                                                                                                                                                                                                                                                                                                                                                              |
| Note to Procurement        |                                                                                                                                                                                                                                                                                                                                                                                                                                                                                                                                                                                                                                                                                              |

| Catalogue Number | Item Name                                            | Available on Transversal Contract | Contract Number or Code |
|------------------|------------------------------------------------------|-----------------------------------|-------------------------|
| PHC-F-070        | <b><i>Cabinet: scheduled drugs, wall-mounted</i></b> | RT24-2016                         | RT24-04-005             |

|                            |                                                                                                                                                                                                                                                                                                                                                                                                                                             |
|----------------------------|---------------------------------------------------------------------------------------------------------------------------------------------------------------------------------------------------------------------------------------------------------------------------------------------------------------------------------------------------------------------------------------------------------------------------------------------|
| Functional Specifications  | <p>Wall-mounted, lockable cabinet.</p> <p>Mild steel construction, with epoxy/nylon powder-coated finish.</p> <p>At least one internal shelf.</p> <p>The mild steel plate shall have a nominal thickness of not less than 1,20 mm.</p> <p>Lock must be robust, and engage fully with the cabinet body. Not of the cam-and-lever variety. Preferably locking by retractable bolts.</p> <p>NOTE: The cabinet must not be marked "Poison".</p> |
| Applicable Standards       | Mild steel frame with epoxy powder-coated or nylon powder-coated finish to comply with SANS 778 paragraph 5.2, proof of compliance must be submitted.                                                                                                                                                                                                                                                                                       |
| Performance Specifications | <p>Adjustable height from 740 mm to 1 090 mm. Automatic lock.</p> <p>Minimum weight bearing capacity measured at free end of table: 20kg without flexing or distortion of frame.</p>                                                                                                                                                                                                                                                        |
| Accessories                | All wall-mounting hardware. 2 keys.                                                                                                                                                                                                                                                                                                                                                                                                         |
| Warranties                 | 2 years.                                                                                                                                                                                                                                                                                                                                                                                                                                    |
| Instructions to Suppliers  |                                                                                                                                                                                                                                                                                                                                                                                                                                             |
| Note to Procurement        | Please note the requirement for the lock – this may differ from the item currently on RT24.                                                                                                                                                                                                                                                                                                                                                 |

| Catalogue Number | Item Name                                                       | Available on Transversal Contract | Contract Number or Code |
|------------------|-----------------------------------------------------------------|-----------------------------------|-------------------------|
| PHC-F-060        | <b><i>Treatment couch:<br/>hydraulic Bobath<br/>(neuro)</i></b> | No                                |                         |

|                            |                                                                                                                                                                                                                              |
|----------------------------|------------------------------------------------------------------------------------------------------------------------------------------------------------------------------------------------------------------------------|
| Functional Specifications  | Large padded treatment couch/plinth, height adjustable (hydraulic) and modular:<br>120-125cm wide, 195cm long, height range 46cm-91cm, backrest angle 80-85 degrees. Safe working load of 250kg. Hydraulic height operation. |
| Applicable Standards       |                                                                                                                                                                                                                              |
| Performance Specifications |                                                                                                                                                                                                                              |
| Accessories                | None.                                                                                                                                                                                                                        |
| Warranties                 | 3 years.                                                                                                                                                                                                                     |
| Instructions to Suppliers  |                                                                                                                                                                                                                              |
| Note to Procurement        |                                                                                                                                                                                                                              |

| Catalogue Number | Item Name                        | Available on Transversal Contract | Contract Number or Code |
|------------------|----------------------------------|-----------------------------------|-------------------------|
| PHC-F-028        | <b><i>Drip stand: mobile</i></b> | RT 24                             | RT 24-08-009            |

|                            |                                                                                                                                                                                                                                                                                                                                                                                                                                                                                                                                                                                                                                                                                                                                                                                                                                                                     |
|----------------------------|---------------------------------------------------------------------------------------------------------------------------------------------------------------------------------------------------------------------------------------------------------------------------------------------------------------------------------------------------------------------------------------------------------------------------------------------------------------------------------------------------------------------------------------------------------------------------------------------------------------------------------------------------------------------------------------------------------------------------------------------------------------------------------------------------------------------------------------------------------------------|
| Functional Specifications  | <p>Drip stand, mobile.</p> <p>Mild steel frame with epoxy powder-coated or nylon powder-coated finish to comply with SANS 778 paragraph 5.2, proof of compliance (Test Report) must be submitted.</p> <p>Castors must comply with the latest issue of SANS 621, proof of compliance (Test Report) must be submitted.</p> <p>Where castors are fitted into steel tubular legs, the tube shall be of wall thickness not less than 2,0mm and castors shall be fixed to the tube by one of the following methods:</p> <ol style="list-style-type: none"> <li>Solid plug (long) complying with SANS 621 subsection 3.5.6 or</li> <li>Screwed into 35mm long sleeves welded into the tubular members and locked in an acceptable manner</li> <li>Rubber or plastic expanding sleeves for fitting castors are not acceptable.</li> </ol> <p>Drag chain to be supplied.</p> |
| Applicable Standards       | <p>To comply with the latest issue of CKS 179, Type A.</p> <p>SANS 778 paragraph 5.2.</p> <p>SANS 621.</p>                                                                                                                                                                                                                                                                                                                                                                                                                                                                                                                                                                                                                                                                                                                                                          |
| Performance Specifications | <p>Must be cleanable and disinfectable with standard solutions.</p> <p>Expected service life: 15 years.</p>                                                                                                                                                                                                                                                                                                                                                                                                                                                                                                                                                                                                                                                                                                                                                         |
| Accessories                | None.                                                                                                                                                                                                                                                                                                                                                                                                                                                                                                                                                                                                                                                                                                                                                                                                                                                               |
| Warranties                 | 2 years on all components.                                                                                                                                                                                                                                                                                                                                                                                                                                                                                                                                                                                                                                                                                                                                                                                                                                          |
| Instructions to Suppliers  | None.                                                                                                                                                                                                                                                                                                                                                                                                                                                                                                                                                                                                                                                                                                                                                                                                                                                               |
| Note to Procurement        | None.                                                                                                                                                                                                                                                                                                                                                                                                                                                                                                                                                                                                                                                                                                                                                                                                                                                               |



| Catalogue Number | Item Name                       | Available on Transversal Contract | Contract Number or Code |
|------------------|---------------------------------|-----------------------------------|-------------------------|
| PHC-F-030        | <b><i>Examination couch</i></b> | RT 24                             | RT 24-02-024            |

|                            |                                                                                                                                                                                                                                                                                                                                                                                                                                                                                                                                                                                                                           |
|----------------------------|---------------------------------------------------------------------------------------------------------------------------------------------------------------------------------------------------------------------------------------------------------------------------------------------------------------------------------------------------------------------------------------------------------------------------------------------------------------------------------------------------------------------------------------------------------------------------------------------------------------------------|
| Functional Specifications  | <p>Examination couch, consisting of mild steel frame (tubular or square section).</p> <p>Epoxy/nylon powder-coated finish to comply with SANS 778 paragraph 5.2, proof of compliance must be submitted</p> <p>Two-piece design, head piece hinged, elevatable to 60 degrees above horizontal. Notched steel supports preferred over friction stay</p> <p>Platform of sealed medium-density fibreboard or 16mm plywood. Sealed.</p> <p>Padding minimum 70mm</p> <p>Covering material must be durable and waterproof. Dark colour preferred.</p> <p>Must be re-upholsterable</p> <p>Heavy-duty rubber ferrules on feet.</p> |
| Applicable Standards       | CSK 243 latest version.                                                                                                                                                                                                                                                                                                                                                                                                                                                                                                                                                                                                   |
| Performance Specifications | <p>Service life at least 10 years.</p> <p>Must be cleanable and disinfectable with standard solutions.</p>                                                                                                                                                                                                                                                                                                                                                                                                                                                                                                                |
| Accessories                |                                                                                                                                                                                                                                                                                                                                                                                                                                                                                                                                                                                                                           |
| Warranties                 | 2 years.                                                                                                                                                                                                                                                                                                                                                                                                                                                                                                                                                                                                                  |
| Instructions to Suppliers  | None.                                                                                                                                                                                                                                                                                                                                                                                                                                                                                                                                                                                                                     |
| Note to Procurement        | None.                                                                                                                                                                                                                                                                                                                                                                                                                                                                                                                                                                                                                     |

| Catalogue Number | Item Name                                     | Available on Transversal Contract | Contract Number or Code |
|------------------|-----------------------------------------------|-----------------------------------|-------------------------|
| PHC-F-061        | <b><i>Examination couch:<br/>portable</i></b> | No                                |                         |

|                            |                                                                                                                                                     |
|----------------------------|-----------------------------------------------------------------------------------------------------------------------------------------------------|
| Functional Specifications  | Folding examination couch, modular, height adjustable, with removable head and arm rests in a canvas bag.<br>Minimum weight-bearing capacity 180kg. |
| Applicable Standards       |                                                                                                                                                     |
| Performance Specifications |                                                                                                                                                     |
| Accessories                | In some models, padded headrest/breathing hole and arm supports may come separately. Should be included.                                            |
| Warranties                 | 3 years.                                                                                                                                            |
| Instructions to Suppliers  |                                                                                                                                                     |
| Note to Procurement        | In some models, padded headrest/breathing hole and arm supports may come separately. Should be included.                                            |

| Catalogue Number | Item Name                              | Available on Transversal Contract | Contract Number or Code |
|------------------|----------------------------------------|-----------------------------------|-------------------------|
| PHC-F-062        | <b><i>Examination couch: rehab</i></b> | No                                |                         |

|                            |                                                                                                                                                                                                                                                                                                                                                                                                                                                                                                                                                                                             |
|----------------------------|---------------------------------------------------------------------------------------------------------------------------------------------------------------------------------------------------------------------------------------------------------------------------------------------------------------------------------------------------------------------------------------------------------------------------------------------------------------------------------------------------------------------------------------------------------------------------------------------|
| Functional Specifications  | <p>Examination couch with breathing hole.</p> <p>Mild steel frame with epoxy/nylon powder-coated finish to comply with SANS 778 paragraph 5.2, proof of compliance must be submitted.</p> <p>Two-piece design, backrest hinged, elevatable to 60 degrees above horizontal. Notched steel supports preferred over friction stay.</p> <p>Platform of sealed medium-density fibreboard or 16mm plywood. Sealed. Padding minimum 70mm.</p> <p>Covering material must be durable and waterproof. Dark colour preferred. Must be re-upholsterable.</p> <p>Heavy-duty rubber ferrules on feet.</p> |
| Applicable Standards       | SANS 778 paragraph 5.2.                                                                                                                                                                                                                                                                                                                                                                                                                                                                                                                                                                     |
| Performance Specifications | <p>Service life at least 10 years.</p> <p>Must be cleanable and disinfected with standard solutions.</p>                                                                                                                                                                                                                                                                                                                                                                                                                                                                                    |
| Accessories                |                                                                                                                                                                                                                                                                                                                                                                                                                                                                                                                                                                                             |
| Warranties                 | 2 years.                                                                                                                                                                                                                                                                                                                                                                                                                                                                                                                                                                                    |
| Instructions to Suppliers  |                                                                                                                                                                                                                                                                                                                                                                                                                                                                                                                                                                                             |
| Note to Procurement        | Need one of this type per facility; remainder can be standard examination couches.                                                                                                                                                                                                                                                                                                                                                                                                                                                                                                          |

| Catalogue Number | Item Name         | Available on Transversal Contract | Contract Number or Code |
|------------------|-------------------|-----------------------------------|-------------------------|
| PHC-F-031        | <b>Foot stool</b> | RT 24                             | RT 24-11-003            |

|                            |                                                                                                                                                                                                                                                                                                                                                                                                                                                                                                                                  |
|----------------------------|----------------------------------------------------------------------------------------------------------------------------------------------------------------------------------------------------------------------------------------------------------------------------------------------------------------------------------------------------------------------------------------------------------------------------------------------------------------------------------------------------------------------------------|
| Functional Specifications  | <p>Stool, foot, double step.</p> <p>To comply with the specification CKS 233 in Annexure J, see attached.</p> <p>Aluminium chequered plate top.</p> <p>Stainless steel edging.</p> <p>Mild steel frame and legs with epoxy/nylon powder-coated finish, to comply with SANS 778 paragraph 5.2, proof of compliance must be submitted.</p> <p>Heavy-duty rubber non-slip, non-scratching ferrules on feet.</p>                                                                                                                     |
| Applicable Standards       | <p>CKS233 in the specification in Appendix J.</p> <p>SANS 778 paragraph 2, proof of compliance must be submitted.</p>                                                                                                                                                                                                                                                                                                                                                                                                            |
| Performance Specifications | <p>Service life minimum 10 years.</p> <p>Must be cleanable and disinfectable with standard solutions.</p>                                                                                                                                                                                                                                                                                                                                                                                                                        |
| Accessories                | None.                                                                                                                                                                                                                                                                                                                                                                                                                                                                                                                            |
| Warranties                 | 2 years.                                                                                                                                                                                                                                                                                                                                                                                                                                                                                                                         |
| Instructions to Suppliers  | None.                                                                                                                                                                                                                                                                                                                                                                                                                                                                                                                            |
| Note to Procurement        | <p>Please ensure that there is additional bracing under the steps, as arranged with the supplier in 2015.</p> <p>Load measurement method in CKS233 is inadequate. Load is too light, spread over a surface area much larger than a person's foot. Hence there have been premature failures – buckling of the steps.</p> <p>Future procurement to increase capacity to at least 180kg, with a load area no wider than 10cmx30cm.</p> <p>Aluminium chequered plate is more durable than non-slip rubber covering on the steps.</p> |

| Catalogue Number | Item Name                | Available on Transversal Contract | Contract Number or Code |
|------------------|--------------------------|-----------------------------------|-------------------------|
| PHC-F-032        | <b><i>Kick-about</i></b> | RT 24                             | RT 24-10-003            |

|                            |                                                                                                                                                                                                                                                                                                                                                                                                                                                                                                                                                                                                                                                                                                                                                                                                                                    |
|----------------------------|------------------------------------------------------------------------------------------------------------------------------------------------------------------------------------------------------------------------------------------------------------------------------------------------------------------------------------------------------------------------------------------------------------------------------------------------------------------------------------------------------------------------------------------------------------------------------------------------------------------------------------------------------------------------------------------------------------------------------------------------------------------------------------------------------------------------------------|
| Functional Specifications  | <p>Kick-about, for bucket.</p> <p>Stainless steel, with medium directional satin finish.</p> <p>Mounted on four legs fitted with castors.</p> <p>Castors must comply with the latest issue of SANS 621, proof of compliance must be submitted.</p> <p>Where castors are fitted into steel tubular legs, the tube shall be of wall thickness not less than 2,0mm and castors shall be fixed to the tube by one of the following methods:</p> <ol style="list-style-type: none"> <li>Solid plug (long) complying with SANS 621 subsection 3.5.6 or</li> <li>Screwed into 35mm long sleeves welded into the tubular members and locked in an acceptable manner</li> <li>Rubber or plastic expanding sleeves for fitting castors are not acceptable.</li> </ol> <p>The horizontal braces to be arranged in a flat cross formation.</p> |
| Applicable Standards       | <p>To comply with the latest issue of CKS 294, Type B.</p> <p>Stainless steel must comply with the latest issue of SANS 417, subsection 4.1.2, proof of compliance must be submitted.</p> <p>SANS 62.</p>                                                                                                                                                                                                                                                                                                                                                                                                                                                                                                                                                                                                                          |
| Performance Specifications | <p>Service life minimum 10 years.</p> <p>Must be cleanable and disinfectable with standard solutions.</p>                                                                                                                                                                                                                                                                                                                                                                                                                                                                                                                                                                                                                                                                                                                          |
| Accessories                | None.                                                                                                                                                                                                                                                                                                                                                                                                                                                                                                                                                                                                                                                                                                                                                                                                                              |
| Warranties                 | 2 years on all components.                                                                                                                                                                                                                                                                                                                                                                                                                                                                                                                                                                                                                                                                                                                                                                                                         |
| Instructions to Suppliers  | None.                                                                                                                                                                                                                                                                                                                                                                                                                                                                                                                                                                                                                                                                                                                                                                                                                              |
| Note to Procurement        | Item to be evaluated as series with item RT 24-10-004 in terms of paragraph 16.4 in the Special Conditions of Contract.                                                                                                                                                                                                                                                                                                                                                                                                                                                                                                                                                                                                                                                                                                            |

| Catalogue Number | Item Name                            | Available on Transversal Contract | Contract Number or Code |
|------------------|--------------------------------------|-----------------------------------|-------------------------|
| PHC-F-071        | <b><i>Locker: bedside, steel</i></b> | RT24-2016                         | RT24-07-001             |

|                            |                                                                                                                                                                                                                                                                                                                                                                                                                                                                                                                                                                                                                                                                                                                                                                                                                                                |
|----------------------------|------------------------------------------------------------------------------------------------------------------------------------------------------------------------------------------------------------------------------------------------------------------------------------------------------------------------------------------------------------------------------------------------------------------------------------------------------------------------------------------------------------------------------------------------------------------------------------------------------------------------------------------------------------------------------------------------------------------------------------------------------------------------------------------------------------------------------------------------|
| Functional Specifications  | <p>Steel bedside locker.</p> <p>Mild steel construction, with epoxy/nylon powder-coated finish.</p> <p>Materials which are easily cleaned and of lasting finish, and low noise generating nature, must be used.</p> <p>Stainless steel top, with rail on three sides.</p> <p>Single pull-out drawer, with durable sliding mechanism and stop to prevent total extraction of drawer.</p> <p>Locker mounted on 4 castors.</p>                                                                                                                                                                                                                                                                                                                                                                                                                    |
| Applicable Standards       | <p>To comply with the latest issue of SANS 343, Type 1 Material: Mild steel with epoxy/nylon powder-coated finish to comply with SANS 778 paragraph 5.2, proof of compliance must be submitted. Stainless steel must comply with the latest issue of SANS 417, subsection 4.1.2.</p> <p>Castors must comply with the latest issue of SANS 621, proof of compliance (Test Report) must be submitted. Where castors are fitted into steel tubular legs, the tube shall be of wall thickness not less than 2,0mm and castors shall be fixed to the tube by one of the following methods: a. Solid plug (long) complying with SANS 621 subsection 3.5.6 or b. Screwed into 35mm long sleeves welded into the tubular members and locked in an acceptable manner c. Rubber or plastic expanding sleeves for fitting castors are not acceptable.</p> |
| Performance Specifications |                                                                                                                                                                                                                                                                                                                                                                                                                                                                                                                                                                                                                                                                                                                                                                                                                                                |
| Accessories                |                                                                                                                                                                                                                                                                                                                                                                                                                                                                                                                                                                                                                                                                                                                                                                                                                                                |
| Warranties                 | 2 years.                                                                                                                                                                                                                                                                                                                                                                                                                                                                                                                                                                                                                                                                                                                                                                                                                                       |
| Instructions to Suppliers  |                                                                                                                                                                                                                                                                                                                                                                                                                                                                                                                                                                                                                                                                                                                                                                                                                                                |
| Note to Procurement        |                                                                                                                                                                                                                                                                                                                                                                                                                                                                                                                                                                                                                                                                                                                                                                                                                                                |

| Catalogue Number | Item Name                                         | Available on Transversal Contract | Contract Number or Code |
|------------------|---------------------------------------------------|-----------------------------------|-------------------------|
| PHC-F-049        | <b><i>Refrigerator: vaccines, chest model</i></b> | No                                |                         |

|                            |                                                                                                                                                                                                                                                                                                                                                                                                                                                                                                                          |
|----------------------------|--------------------------------------------------------------------------------------------------------------------------------------------------------------------------------------------------------------------------------------------------------------------------------------------------------------------------------------------------------------------------------------------------------------------------------------------------------------------------------------------------------------------------|
| Functional Specifications  | <p>Chest model.</p> <p>As per WHO specification E003/RF01.2 “Refrigerator or combined refrigerator water-pack freezer: compression cycle”, with the following modifications (not in WHO spec).</p> <p>Minimum internal volume = 100l.</p> <p>No water-pack freezer compartment (we will cater for this need by specifying a medicine fridge with freezer compartment).</p> <p>Will be used with an externally readable data logging thermometer, procured as separate item.</p> <p>Power supply: 220V /50Hz 1 phase.</p> |
| Applicable Standards       | <p>Refrigerant: CFC free.</p> <p>WHO specification E003/RF01.2 Pre-qualification on WHO PQS – with proof – will be an advantage.</p>                                                                                                                                                                                                                                                                                                                                                                                     |
| Performance Specifications | <p>Warning device for min. 12h in the event of power failure (power failure alarm).</p> <p>Hold-over period 48 hrs or better.</p> <p>Must be cleanable and disinfected with standard materials.</p>                                                                                                                                                                                                                                                                                                                      |
| Accessories                | None.                                                                                                                                                                                                                                                                                                                                                                                                                                                                                                                    |
| Warranties                 | 3 years.                                                                                                                                                                                                                                                                                                                                                                                                                                                                                                                 |
| Instructions to Suppliers  | <p>Optionally the supplier can propose more than one model, for use in moderate and hot temperature zones.</p> <p>Includes delivery, installation, training.</p> <p>Supplier must specify available after-sales support, with relevant pricing.</p> <p>Supplier should propose a shelving solution as an optional costed item, to overcome the inherent disadvantage of this type of model (i.e. accessing items located below other items).</p>                                                                         |
| Note to Procurement        | A separate data logging thermometer is required for use with this item. The thermometer has a 2-year service life.                                                                                                                                                                                                                                                                                                                                                                                                       |

| Catalogue Number | Item Name                                           | Available on Transversal Contract | Contract Number or Code |
|------------------|-----------------------------------------------------|-----------------------------------|-------------------------|
| PHC-F-050        | <b><i>Refrigerator: vaccines, upright model</i></b> | No                                |                         |

|                            |                                                                                                                                                                                                                                                                                                                                                                                                                                                                                                                         |
|----------------------------|-------------------------------------------------------------------------------------------------------------------------------------------------------------------------------------------------------------------------------------------------------------------------------------------------------------------------------------------------------------------------------------------------------------------------------------------------------------------------------------------------------------------------|
| Functional Specifications  | <p>Upright model.</p> <p>As per WHO specification E003/RF01.2 “Refrigerator or combined refrigerator water-pack freezer, compression cycle”, with the following modifications (not in WHO spec):</p> <p>Minimum internal volume = 100l</p> <p>No water-pack freezer compartment (we will cater for this need by specifying a medicine fridge with freezer compartment)</p> <p>Will be used with an externally readable data logging thermometer, procured as separate item</p> <p>Power supply: 220V /50Hz 1 phase.</p> |
| Applicable Standards       | <p>Refrigerant: CFC free.</p> <p>WHO specification E003/RF01.2 Pre-qualification on WHO PQS -with proof – will be an advantage.</p>                                                                                                                                                                                                                                                                                                                                                                                     |
| Performance Specifications | <p>Warning device for min. 12h in the event of power failure (power failure alarm).</p> <p>Hold-over period 48 hours or better.</p> <p>Must be cleanable and disinfectable with standard materials.</p>                                                                                                                                                                                                                                                                                                                 |
| Accessories                | None.                                                                                                                                                                                                                                                                                                                                                                                                                                                                                                                   |
| Warranties                 | 3 years.                                                                                                                                                                                                                                                                                                                                                                                                                                                                                                                |
| Instructions to Suppliers  | <p>Optionally the supplier can propose more than one model, for use in moderate and hot temperature zones.</p> <p>Includes delivery, installation, training.</p> <p>Supplier must specify availability of after-sales support, with relevant pricing.</p>                                                                                                                                                                                                                                                               |
| Note to Procurement        | A separate data logging thermometer is required for use with this item. The thermometer has a 2-year service life.                                                                                                                                                                                                                                                                                                                                                                                                      |



| Catalogue Number | Item Name                                               | Available on Transversal Contract | Contract Number or Code |
|------------------|---------------------------------------------------------|-----------------------------------|-------------------------|
| PHC-F-063        | <b>Screen: bedside, wheeled. Complete with curtain.</b> | RT24-2016                         | RT24-11-009             |

|                            |                                                                                                                                                                                                                                                                                                                                                                                                                                                                                                                                                                                                                                                                                                                                                                                                                                                                                                                                                                                                                                                                                             |
|----------------------------|---------------------------------------------------------------------------------------------------------------------------------------------------------------------------------------------------------------------------------------------------------------------------------------------------------------------------------------------------------------------------------------------------------------------------------------------------------------------------------------------------------------------------------------------------------------------------------------------------------------------------------------------------------------------------------------------------------------------------------------------------------------------------------------------------------------------------------------------------------------------------------------------------------------------------------------------------------------------------------------------------------------------------------------------------------------------------------------------|
| Functional Specifications  | <p>Four-panel concertina- foldable screen, consisting of steel frames on castors, and plastic curtains. Must comply with the latest issue of SANS 897, fig.3, Type C.</p> <p>Overall height 1 680 mm.</p> <p>Mild steel frame and legs with epoxy/nylon powder-coated finish, to comply with SANS 778 paragraph 5.2, proof of compliance must be submitted. Castors: 75 mm Castors must comply with the latest issue of SANS 621, proof of compliance must be submitted.</p> <p>Where castors are fitted into steel tubular legs, the tube shall be of wall thickness not less than 2,0mm and castors shall be fixed to the tube by one of the following methods: a. Solid plug (long) complying with SANS 621 subsection 3.5.6 or b. Screwed into 35mm long sleeves welded into the tubular members and locked in an acceptable manner c. Rubber or plastic expanding sleeves for fitting castors are not acceptable.</p> <p>Curtain to be as follows: Strong non-transparent plastic Sides to be strengthened and to be full fit in frame sections. Curtain must be easily removable.</p> |
| Applicable Standards       | <p>SANS 897, fig.3, Type C.</p> <p>SANS 778 paragraph 5.2.</p> <p>SANS 621.</p>                                                                                                                                                                                                                                                                                                                                                                                                                                                                                                                                                                                                                                                                                                                                                                                                                                                                                                                                                                                                             |
| Performance Specifications | <p>Curtains must be washable. Expected service life:</p> <p>Frames 10 years</p> <p>Curtains 3 years.</p>                                                                                                                                                                                                                                                                                                                                                                                                                                                                                                                                                                                                                                                                                                                                                                                                                                                                                                                                                                                    |
| Accessories                | Replacement curtains RT24-11-010.                                                                                                                                                                                                                                                                                                                                                                                                                                                                                                                                                                                                                                                                                                                                                                                                                                                                                                                                                                                                                                                           |
| Warranties                 | 5 years on frames, 1 year on curtains.                                                                                                                                                                                                                                                                                                                                                                                                                                                                                                                                                                                                                                                                                                                                                                                                                                                                                                                                                                                                                                                      |
| Instructions to Suppliers  |                                                                                                                                                                                                                                                                                                                                                                                                                                                                                                                                                                                                                                                                                                                                                                                                                                                                                                                                                                                                                                                                                             |
| Note to Procurement        |                                                                                                                                                                                                                                                                                                                                                                                                                                                                                                                                                                                                                                                                                                                                                                                                                                                                                                                                                                                                                                                                                             |

| Catalogue Number | Item Name                                    | Available on Transversal Contract | Contract Number or Code |
|------------------|----------------------------------------------|-----------------------------------|-------------------------|
| PHC-F-064        | <b>Screen: bedside, replacement curtains</b> | RT24-2016                         | RT24-11-010             |

|                            |                                                                                                                                                                                                                          |
|----------------------------|--------------------------------------------------------------------------------------------------------------------------------------------------------------------------------------------------------------------------|
| Functional Specifications  | Replacement curtain for 4-panel folding screen on castors.<br>Strong non-transparent plastic sides to be strengthened.<br>Strong non-transparent sides to be strengthened and curtains to be full fit in frame sections. |
| Applicable Standards       |                                                                                                                                                                                                                          |
| Performance Specifications | Must be washable.<br>Expected service life 3 years.                                                                                                                                                                      |
| Accessories                | None.                                                                                                                                                                                                                    |
| Warranties                 | 1 year.                                                                                                                                                                                                                  |
| Instructions to Suppliers  |                                                                                                                                                                                                                          |
| Note to Procurement        | Must be compatible with item RT24-11-009.                                                                                                                                                                                |

| Catalogue Number | Item Name                         | Available on Transversal Contract | Contract Number or Code |
|------------------|-----------------------------------|-----------------------------------|-------------------------|
| PHC-F-034        | <b><i>Stool: anaesthetist</i></b> | RT 24                             | RT 24-11-002            |

|                            |                                                                                                                                                                                                                                                                                                                                                                                                                                                                                                                                                                                                                                                                                                                                                                                                                 |
|----------------------------|-----------------------------------------------------------------------------------------------------------------------------------------------------------------------------------------------------------------------------------------------------------------------------------------------------------------------------------------------------------------------------------------------------------------------------------------------------------------------------------------------------------------------------------------------------------------------------------------------------------------------------------------------------------------------------------------------------------------------------------------------------------------------------------------------------------------|
| Functional Specifications  | <p>Stool, anaesthetist, with castors.</p> <p>To comply with CKS233 Type B.</p> <p>Aluminium flat seat.</p> <p>Spindle to be threaded with square or acme thread.</p> <p><b>Castors:</b> 75mm.</p> <p>Castors must comply with the latest issue of SANS 621, proof of compliance must be submitted.</p> <p>Where castors are fitted into steel tubular legs, the tube shall be of wall thickness not less than 2,0mm and castors shall be fixed to the tube by one of the following methods:</p> <ol style="list-style-type: none"> <li>Solid plug (long) complying with SANS 621 subsection 3.5.6 or</li> <li>Screwed into 35mm long sleeves welded into the tubular members and locked in an acceptable manner</li> <li>Rubber or plastic expanding sleeves for fitting castors are not acceptable.</li> </ol> |
| Applicable Standards       | <p>CKS233 Type B.</p> <p>SANS 621, proof of compliance must be submitted.</p>                                                                                                                                                                                                                                                                                                                                                                                                                                                                                                                                                                                                                                                                                                                                   |
| Performance Specifications | <p>Height adjustments, floor to top of seat: 485mm to 685mm.</p> <p>Service life minimum 10 years.</p> <p>Must be cleanable and disinfected with standard solutions.</p>                                                                                                                                                                                                                                                                                                                                                                                                                                                                                                                                                                                                                                        |
| Accessories                | None.                                                                                                                                                                                                                                                                                                                                                                                                                                                                                                                                                                                                                                                                                                                                                                                                           |
| Warranties                 | 2 years.                                                                                                                                                                                                                                                                                                                                                                                                                                                                                                                                                                                                                                                                                                                                                                                                        |
| Instructions to Suppliers  | None.                                                                                                                                                                                                                                                                                                                                                                                                                                                                                                                                                                                                                                                                                                                                                                                                           |
| Note to Procurement        |                                                                                                                                                                                                                                                                                                                                                                                                                                                                                                                                                                                                                                                                                                                                                                                                                 |

| Catalogue Number | Item Name                             | Available on Transversal Contract | Contract Number or Code |
|------------------|---------------------------------------|-----------------------------------|-------------------------|
| PHC-F-065        | <b><i>Stool: dental assistant</i></b> | In preparation                    |                         |

|                            |                                                                                                                                                                                                                                                                                                                                                                                                                                                                                                                                                                                                                                                                                                                                |
|----------------------------|--------------------------------------------------------------------------------------------------------------------------------------------------------------------------------------------------------------------------------------------------------------------------------------------------------------------------------------------------------------------------------------------------------------------------------------------------------------------------------------------------------------------------------------------------------------------------------------------------------------------------------------------------------------------------------------------------------------------------------|
| Functional Specifications  | <p>An ergonomic stool used by the Dental assistant.</p> <p>2-way adjustable backrest for lumbar support. Anatomically shaped.</p> <p>Contoured seat cushions with a “rolled” edge to reduce pressure on the legs.</p> <p>Easy to reach adjustment paddle for increased lumbar support.</p> <p>Tear-resistant upholster.</p> <p>Seamless upholstery for easier cleaning.</p> <p>Upholstery, design and colour to be in line with the patient operator chair.</p> <p>5 leg cast aluminium base.</p> <p>Twin wheel castors.</p> <p>Adjustable torso support that can be converted for left or right handed operators.</p> <p>Height adjustable foot ring.</p> <p>The unit must be height adjustable (gas cylinder or spring).</p> |
| Applicable Standards       | ISO 7493: 2006.                                                                                                                                                                                                                                                                                                                                                                                                                                                                                                                                                                                                                                                                                                                |
| Performance Specifications | Expected service life 10 years.                                                                                                                                                                                                                                                                                                                                                                                                                                                                                                                                                                                                                                                                                                |
| Accessories                | None.                                                                                                                                                                                                                                                                                                                                                                                                                                                                                                                                                                                                                                                                                                                          |
| Warranties                 | <p>5 years.</p> <p>Spares availability guarantee 5 years.</p>                                                                                                                                                                                                                                                                                                                                                                                                                                                                                                                                                                                                                                                                  |
| Instructions to Suppliers  | None.                                                                                                                                                                                                                                                                                                                                                                                                                                                                                                                                                                                                                                                                                                                          |
| Note to Procurement        |                                                                                                                                                                                                                                                                                                                                                                                                                                                                                                                                                                                                                                                                                                                                |

| Catalogue Number | Item Name                    | Available on Transversal Contract | Contract Number or Code |
|------------------|------------------------------|-----------------------------------|-------------------------|
| PHC-F-066        | <b><i>Stool: dentist</i></b> | In preparation                    |                         |

|                            |                                                                                                                                                                                                                                                                                                                                                                                                                                                                                                                                                                                                                  |
|----------------------------|------------------------------------------------------------------------------------------------------------------------------------------------------------------------------------------------------------------------------------------------------------------------------------------------------------------------------------------------------------------------------------------------------------------------------------------------------------------------------------------------------------------------------------------------------------------------------------------------------------------|
| Functional Specifications  | <p>An ergonomic stool used by the operator.</p> <p>2-way adjustable backrest for lumbar support. Anatomically shaped.</p> <p>Contoured seat cushions with a “rolled” edge to reduce pressure on the legs.</p> <p>Easy to reach adjustment paddle for increasing lumbar support.</p> <p>Tear- resistant upholstery.</p> <p>Seamless upholstery for easier cleaning.</p> <p>Upholstery, design and colour to be in line with the patient chair.</p> <p>5 leg cast aluminium base.</p> <p>Twin wheel castors.</p> <p>The unit must be height adjustable.</p> <p>The unit must have active and passive backrest.</p> |
| Applicable Standards       | ISO 7493: 2006.                                                                                                                                                                                                                                                                                                                                                                                                                                                                                                                                                                                                  |
| Performance Specifications | Expected service life 10 years.                                                                                                                                                                                                                                                                                                                                                                                                                                                                                                                                                                                  |
| Accessories                | None.                                                                                                                                                                                                                                                                                                                                                                                                                                                                                                                                                                                                            |
| Warranties                 | <p>5 years.</p> <p>Spares availability guarantee 5 years.</p>                                                                                                                                                                                                                                                                                                                                                                                                                                                                                                                                                    |
| Instructions to Suppliers  | None.                                                                                                                                                                                                                                                                                                                                                                                                                                                                                                                                                                                                            |
| Note to Procurement        |                                                                                                                                                                                                                                                                                                                                                                                                                                                                                                                                                                                                                  |

| Catalogue Number | Item Name                                             | Available on Transversal Contract | Contract Number or Code |
|------------------|-------------------------------------------------------|-----------------------------------|-------------------------|
| PHC-F-035        | <b><i>Stool: height adjustable, with backrest</i></b> | No                                |                         |

|                            |                                                                                                                                                                                                                                                                                                                                                                                                                                                                                                                                                                                                                                                                                                                                                                                                                                                                                                                                                 |
|----------------------------|-------------------------------------------------------------------------------------------------------------------------------------------------------------------------------------------------------------------------------------------------------------------------------------------------------------------------------------------------------------------------------------------------------------------------------------------------------------------------------------------------------------------------------------------------------------------------------------------------------------------------------------------------------------------------------------------------------------------------------------------------------------------------------------------------------------------------------------------------------------------------------------------------------------------------------------------------|
| Functional Specifications  | <p>Stool, dental-type, with castors.</p> <p>To comply with CKS233 Type B.</p> <p>Upholstered seat.</p> <p>Spindle to be threaded with square or acme thread.</p> <p>Can swivel, but not tilt. Footrest ring above level of castors.</p> <p><b>Castors:</b> 75mm.</p> <p>Castors must comply with the latest issue of SANS 621, proof of compliance must be submitted.</p> <p>Where castors are fitted into steel tubular legs, the tube shall be of wall thickness not less than 2,0mm and castors shall be fixed to the tube by one of the following methods:</p> <ol style="list-style-type: none"> <li>Solid plug (long) complying with SANS 621 subsection 3.5.6 or</li> <li>Screwed into 35mm long sleeves welded into the tubular members and locked in an acceptable manner</li> <li>Rubber or plastic expanding sleeves for fitting castors are not acceptable.</li> </ol> <p>Backrest: padded, height adjustable relative to seat.</p> |
| Applicable Standards       | <p>CKS233 Type B.</p> <p>SANS 621, proof of compliance must be submitted.</p>                                                                                                                                                                                                                                                                                                                                                                                                                                                                                                                                                                                                                                                                                                                                                                                                                                                                   |
| Performance Specifications | <p>Height adjustments, floor to top of seat: 485mm to 685mm.</p> <p>Service life minimum 10 years.</p> <p>Must be cleanable and disinfectable with standard solutions.</p>                                                                                                                                                                                                                                                                                                                                                                                                                                                                                                                                                                                                                                                                                                                                                                      |
| Accessories                | None.                                                                                                                                                                                                                                                                                                                                                                                                                                                                                                                                                                                                                                                                                                                                                                                                                                                                                                                                           |
| Warranties                 | 2 years.                                                                                                                                                                                                                                                                                                                                                                                                                                                                                                                                                                                                                                                                                                                                                                                                                                                                                                                                        |
| Instructions to Suppliers  | None.                                                                                                                                                                                                                                                                                                                                                                                                                                                                                                                                                                                                                                                                                                                                                                                                                                                                                                                                           |
| Note to Procurement        |                                                                                                                                                                                                                                                                                                                                                                                                                                                                                                                                                                                                                                                                                                                                                                                                                                                                                                                                                 |

| Catalogue Number | Item Name                      | Available on Transversal Contract | Contract Number or Code |
|------------------|--------------------------------|-----------------------------------|-------------------------|
| PHC-F-075        | <b><i>Table: over- bed</i></b> | RT24-2016                         | RT24-07-003             |

|                            |                                                                                                                                                                                                                                                                                                                                                                                                                                                                                                                                                                                                                                                                                                                                                |
|----------------------------|------------------------------------------------------------------------------------------------------------------------------------------------------------------------------------------------------------------------------------------------------------------------------------------------------------------------------------------------------------------------------------------------------------------------------------------------------------------------------------------------------------------------------------------------------------------------------------------------------------------------------------------------------------------------------------------------------------------------------------------------|
| Functional Specifications  | Cantilever-type over-bed table – can be placed in position from the side of the bed.                                                                                                                                                                                                                                                                                                                                                                                                                                                                                                                                                                                                                                                           |
| Applicable Standards       | To comply with the latest issue of SANS 777, Type B Mild steel frame with epoxy powder-coated or nylon powder-coated finish to comply with SANS 778 paragraph 5.2, proof of compliance must be submitted. Castors must comply with the latest issue of SANS 621, proof of compliance must be submitted. Where castors are fitted into steel tubular legs, the tube shall be of wall thickness not less than 2,0mm and castors shall be fixed to the tube by one of the following methods: a. Solid plug (long) complying with SANS 621 subsection 3.5.6 or b. Screwed into 35mm long sleeves welded into the tubular members and locked in an acceptable manner c. Rubber or plastic expanding sleeves for fitting castors are not acceptable. |
| Performance Specifications | Adjustable height from 740 mm to 1 090 mm. Automatic lock.<br>Minimum weight bearing capacity measured at free end of table: 20kg without flexing or distortion of frame.                                                                                                                                                                                                                                                                                                                                                                                                                                                                                                                                                                      |
| Accessories                |                                                                                                                                                                                                                                                                                                                                                                                                                                                                                                                                                                                                                                                                                                                                                |
| Warranties                 | 2 years.                                                                                                                                                                                                                                                                                                                                                                                                                                                                                                                                                                                                                                                                                                                                       |
| Instructions to Suppliers  |                                                                                                                                                                                                                                                                                                                                                                                                                                                                                                                                                                                                                                                                                                                                                |
| Note to Procurement        |                                                                                                                                                                                                                                                                                                                                                                                                                                                                                                                                                                                                                                                                                                                                                |

| Catalogue Number | Item Name                          | Available on Transversal Contract | Contract Number or Code |
|------------------|------------------------------------|-----------------------------------|-------------------------|
| PHC-F-036        | <b><i>Trolley: anaesthetic</i></b> | RT 24                             | RT 24-12-005            |

|                            |                                                                                                                                                                                                                                                                                                                                                                                                                                                                                                                                                                                                                                                                                                                                                                                                                                                                                                                                                                                                                                                                                                                                                                                                                                                                                                                                                                                                                                                                                     |
|----------------------------|-------------------------------------------------------------------------------------------------------------------------------------------------------------------------------------------------------------------------------------------------------------------------------------------------------------------------------------------------------------------------------------------------------------------------------------------------------------------------------------------------------------------------------------------------------------------------------------------------------------------------------------------------------------------------------------------------------------------------------------------------------------------------------------------------------------------------------------------------------------------------------------------------------------------------------------------------------------------------------------------------------------------------------------------------------------------------------------------------------------------------------------------------------------------------------------------------------------------------------------------------------------------------------------------------------------------------------------------------------------------------------------------------------------------------------------------------------------------------------------|
| Functional Specifications  | <p>Trolley, anaesthetic. Type 3 , size C.</p> <p>To comply with the latest issue of SANS 726 (see fig 2 and table 2).</p> <p>Size: Length: 455mm (<math>\pm</math> 5mm).</p> <p><b>Width:</b> 455mm (<math>\pm</math> 5mm).</p> <p>The upper part is enclosed to contain a drawer (with no divisions) opening to the front.</p> <p>Drawer must have a stopper to prevent complete removal of drawer.</p> <p>Durable rubber plugs (or similar noise reducing material) must be inserted into rails below removable shelves.</p> <p>The top shelf has a rail along sides and back.</p> <p>Bottom shelf must have a continuous rail on all four sides.</p> <p>Materials which are easily cleaned and of lasting finish, and low noise generating nature, shall be used.</p> <p>Stainless steel throughout. Stainless steel must comply with subsection 4.1.2 of the latest issue of SANS 417 (See special conditions).</p> <p>Four swivel castors with a diameter of 75mm each.</p> <p>Castors shall be in accordance with SANS 621 (see Special Conditions).</p> <p>Where castors are fitted into steel tubular legs, the tube shall be of wall thickness not less than 2,0mm and castors shall be fixed to the tube by one of the following methods:</p> <ol style="list-style-type: none"> <li>Solid plug (long) complying with SANS 621 subsection 3.5.6 or</li> <li>Screwed into 35mm long sleeves welded into the tubular members and locked in an acceptable manner.</li> </ol> |
| Applicable Standards       | <p>To comply with the latest issue of CKS 294, Type B.</p> <p>Stainless steel must comply with the latest issue of SANS 417, subsection 4.1.2, proof of compliance must be submitted.</p> <p>SANS 621.</p>                                                                                                                                                                                                                                                                                                                                                                                                                                                                                                                                                                                                                                                                                                                                                                                                                                                                                                                                                                                                                                                                                                                                                                                                                                                                          |
| Performance Specifications | <p>Service life minimum 10 years.</p> <p>Must be cleanable and disinfectable with standard solutions.</p>                                                                                                                                                                                                                                                                                                                                                                                                                                                                                                                                                                                                                                                                                                                                                                                                                                                                                                                                                                                                                                                                                                                                                                                                                                                                                                                                                                           |
| Accessories                | None.                                                                                                                                                                                                                                                                                                                                                                                                                                                                                                                                                                                                                                                                                                                                                                                                                                                                                                                                                                                                                                                                                                                                                                                                                                                                                                                                                                                                                                                                               |
| Warranties                 | 2 years on all components.                                                                                                                                                                                                                                                                                                                                                                                                                                                                                                                                                                                                                                                                                                                                                                                                                                                                                                                                                                                                                                                                                                                                                                                                                                                                                                                                                                                                                                                          |
| Instructions to Suppliers  | None.                                                                                                                                                                                                                                                                                                                                                                                                                                                                                                                                                                                                                                                                                                                                                                                                                                                                                                                                                                                                                                                                                                                                                                                                                                                                                                                                                                                                                                                                               |
| Note to Procurement        | None.                                                                                                                                                                                                                                                                                                                                                                                                                                                                                                                                                                                                                                                                                                                                                                                                                                                                                                                                                                                                                                                                                                                                                                                                                                                                                                                                                                                                                                                                               |



| Catalogue Number | Item Name                        | Available on Transversal Contract | Contract Number or Code |
|------------------|----------------------------------|-----------------------------------|-------------------------|
| PHC-F-040        | <b><i>Trolley: emergency</i></b> | RT 24-2016                        | RT 24-12-001            |

|                            |                                                                                                                                                                                                                                                                                                                                                                                                                                                                                                                                                                                                                                                                                                                                                                                                                                                                                                                                                                                                                                                                                                                                                         |
|----------------------------|---------------------------------------------------------------------------------------------------------------------------------------------------------------------------------------------------------------------------------------------------------------------------------------------------------------------------------------------------------------------------------------------------------------------------------------------------------------------------------------------------------------------------------------------------------------------------------------------------------------------------------------------------------------------------------------------------------------------------------------------------------------------------------------------------------------------------------------------------------------------------------------------------------------------------------------------------------------------------------------------------------------------------------------------------------------------------------------------------------------------------------------------------------|
| Functional Specifications  | <p>Dedicated “crash cart” type trolley.</p> <p>All metal or ABS construction</p> <p>Side-accessible slide-out tray for medication preparation</p> <p>Top drawer lockable half-height, with Moulded insert for emergency drugs. Facility for Tamper–proof seals</p> <p>Four half-height drawers, for resuscitation equipment, bandages, syringes, needles, ET tubes</p> <p>One deep drawer for manual resuscitation ventilators and masks</p> <p>Side bracket for portable suction machine</p> <p>Side accessory tilt-out drawers</p> <p>On-board attached multi-plug with at least 5 15A 3-pin sockets (switchable) and 5 Euro-style sockets. Single power lead, 3-core 2,5mm<sup>2</sup>, terminated with moulded 15A 3-pin plug (SANS approved)</p> <p>Raised bridge rail at rear of top, to attach NIBP monitor and AED</p> <p>Swing-out trays not suitable</p> <p>Built-in extendable drip stand, left- or right-mounting</p> <p>Mounted on 4 approved castors, with non-loosening fixings</p> <p>Hooks for mounting cardiac board at rear</p> <p>Oxygen cylinder holder not required</p> <p>Cleanable and disinfected with standard solutions.</p> |
| Applicable Standards       | SANS 621.                                                                                                                                                                                                                                                                                                                                                                                                                                                                                                                                                                                                                                                                                                                                                                                                                                                                                                                                                                                                                                                                                                                                               |
| Performance Specifications | <p>Service life minimum 10 years.</p> <p>Must be cleanable and disinfected with standard solutions.</p> <p>Dimensions must allow passage through standard doorway.</p>                                                                                                                                                                                                                                                                                                                                                                                                                                                                                                                                                                                                                                                                                                                                                                                                                                                                                                                                                                                  |
| Accessories                | <p>Cardiac board, drugs insert, laryngoscope and ET tube insert.</p> <p>Half-height plastic bins for syringes and needles. Drip T-rod.</p>                                                                                                                                                                                                                                                                                                                                                                                                                                                                                                                                                                                                                                                                                                                                                                                                                                                                                                                                                                                                              |
| Warranties                 | 2 years on all components.                                                                                                                                                                                                                                                                                                                                                                                                                                                                                                                                                                                                                                                                                                                                                                                                                                                                                                                                                                                                                                                                                                                              |
| Instructions to Suppliers  | Delivered and assembled. Propose optional drawer dividers (priced per set).                                                                                                                                                                                                                                                                                                                                                                                                                                                                                                                                                                                                                                                                                                                                                                                                                                                                                                                                                                                                                                                                             |
| Note to Procurement        | These specifications exceed those in RT 24, and should be used for future procurement. The existing configuration was found to be inadequate for PHC purposes.                                                                                                                                                                                                                                                                                                                                                                                                                                                                                                                                                                                                                                                                                                                                                                                                                                                                                                                                                                                          |

| Catalogue Number | Item Name                           | Available on Transversal Contract | Contract Number or Code |
|------------------|-------------------------------------|-----------------------------------|-------------------------|
| PHC-F-041        | <b><i>Trolley: gas cylinder</i></b> | RT 24                             | RT 24-12-003            |

|                            |                                                                                                                                                                                                                                                      |
|----------------------------|------------------------------------------------------------------------------------------------------------------------------------------------------------------------------------------------------------------------------------------------------|
| Functional Specifications  | Gas cylinder trolley, for 300mm diameter cylinder.<br>To comply with the latest issue of SANS 895.<br>Material: Mild steel frame with epoxy/nylon powder-coated finish to comply with SANS 778 paragraph 5.2, proof of compliance must be submitted. |
| Applicable Standards       | SANS 895.<br>SANS 778 paragraph 5.2.                                                                                                                                                                                                                 |
| Performance Specifications | Diameter of cylinder: 300mm.<br>Length of cylinder: 1 300mm.                                                                                                                                                                                         |
| Accessories                |                                                                                                                                                                                                                                                      |
| Warranties                 | 2 years.                                                                                                                                                                                                                                             |
| Instructions to Suppliers  | None.                                                                                                                                                                                                                                                |
| Note to Procurement        | Must have at least two wheels.                                                                                                                                                                                                                       |

| Catalogue Number | Item Name                                      | Available on Transversal Contract | Contract Number or Code |
|------------------|------------------------------------------------|-----------------------------------|-------------------------|
| PHC-F-039        | <b><i>Trolley: medical dressing, large</i></b> | RT 24                             | RT 24-12-008            |

|                            |                                                                                                                                                                                                                                                                                                                                                                                                                                                                                                                                                                                                                                                                                                                                                                                                                                                                                                                                                                                                                                                                                                                                                                        |
|----------------------------|------------------------------------------------------------------------------------------------------------------------------------------------------------------------------------------------------------------------------------------------------------------------------------------------------------------------------------------------------------------------------------------------------------------------------------------------------------------------------------------------------------------------------------------------------------------------------------------------------------------------------------------------------------------------------------------------------------------------------------------------------------------------------------------------------------------------------------------------------------------------------------------------------------------------------------------------------------------------------------------------------------------------------------------------------------------------------------------------------------------------------------------------------------------------|
| Functional Specifications  | <p>Trolley, medical dressing.</p> <p>To comply with the latest issue of SANS 726 (see fig 4).</p> <p>Length: 915mm (<math>\pm</math> 5mm).</p> <p>Width: 455mm (<math>\pm</math> 5mm).</p> <p>The trolley is open and has two removable stainless steel shelves.</p> <p>Durable rubber plugs (or similar noise reducing material) must be inserted into rails below removable shelves.</p> <p>It has a continuous guard rail along the sides and back of the top shelf and a continuous rail fitted around the bottom, above the bottom shelf.</p> <p>Materials which are easily cleaned and of lasting finish, and low noise generating nature, shall be used. Stainless steel throughout.</p> <p>Four swivel castors with a diameter of 75mm each. Where castors are fitted into steel tubular legs, the tube shall be of wall thickness not less than 2,0mm and castors shall be fixed to the tube by one of the following methods:</p> <ol style="list-style-type: none"> <li>Solid plug (long) complying with SANS 621 subsection 3.5.6 or</li> <li>Screwed into 35mm long sleeves welded into the tubular members and locked in an acceptable manner.</li> </ol> |
| Applicable Standards       | <p>To comply with the latest issue of SANS 726, Type 4, size A.</p> <p>Stainless steel must comply with the latest issue of SANS 417, subsection 4.1.2, proof of compliance must be submitted.</p> <p>Castors shall be in accordance with SANS 621 (see Special Conditions).</p>                                                                                                                                                                                                                                                                                                                                                                                                                                                                                                                                                                                                                                                                                                                                                                                                                                                                                       |
| Performance Specifications | <p>Service life minimum 10 years.</p> <p>Must be cleanable and disinfected with standard solutions.</p>                                                                                                                                                                                                                                                                                                                                                                                                                                                                                                                                                                                                                                                                                                                                                                                                                                                                                                                                                                                                                                                                |
| Accessories                | None.                                                                                                                                                                                                                                                                                                                                                                                                                                                                                                                                                                                                                                                                                                                                                                                                                                                                                                                                                                                                                                                                                                                                                                  |
| Warranties                 | 2 years on all components.                                                                                                                                                                                                                                                                                                                                                                                                                                                                                                                                                                                                                                                                                                                                                                                                                                                                                                                                                                                                                                                                                                                                             |
| Instructions to Suppliers  | None.                                                                                                                                                                                                                                                                                                                                                                                                                                                                                                                                                                                                                                                                                                                                                                                                                                                                                                                                                                                                                                                                                                                                                                  |
| Note to Procurement        |                                                                                                                                                                                                                                                                                                                                                                                                                                                                                                                                                                                                                                                                                                                                                                                                                                                                                                                                                                                                                                                                                                                                                                        |

| Catalogue Number | Item Name                                          | Available on Transversal Contract | Contract Number or Code |
|------------------|----------------------------------------------------|-----------------------------------|-------------------------|
| PHC-F-038        | <b><i>Trolley: medical instruments, medium</i></b> | RT 24                             | RT 24-12-013            |

|                            |                                                                                                                                                                                                                                                                                                                                                                                                                                                                                                                                                                                                                                                                                                                                                                                                                                                                                                                                                                                                                                                                                                                                                                                                                                                                           |
|----------------------------|---------------------------------------------------------------------------------------------------------------------------------------------------------------------------------------------------------------------------------------------------------------------------------------------------------------------------------------------------------------------------------------------------------------------------------------------------------------------------------------------------------------------------------------------------------------------------------------------------------------------------------------------------------------------------------------------------------------------------------------------------------------------------------------------------------------------------------------------------------------------------------------------------------------------------------------------------------------------------------------------------------------------------------------------------------------------------------------------------------------------------------------------------------------------------------------------------------------------------------------------------------------------------|
| Functional Specifications  | <p>Trolley, medical dressing, medium.</p> <p>To comply with the latest issue of SANS 726 (see fig 4).</p> <p>Length: 915mm (<math>\pm</math> 5mm).</p> <p>Width: 455mm (<math>\pm</math> 5mm).</p> <p>The trolley is open and has two removable stainless steel shelves.</p> <p>No guard on top shelf, and continuous guard rail on all four sides of bottom shelf.</p> <p>Durable rubber plugs (or similar noise reducing material) must be inserted into rails below removable shelves.</p> <p>It has a continuous guard rail along the sides and back of the top shelf and a continuous rail fitted around the bottom, above the bottom shelf.</p> <p>Materials which are easily cleaned and of lasting finish, and low noise generating nature, shall be used. Stainless steel throughout.</p> <p>Four swivel castors with a diameter of 75mm each. Where castors are fitted into steel tubular legs, the tube shall be of wall thickness not less than 2,0mm and castors shall be fixed to the tube by one of the following methods:</p> <ol style="list-style-type: none"> <li>Solid plug (long) complying with SANS 621 subsection 3.5.6 or</li> <li>Screwed into 35mm long sleeves welded into the tubular members and locked in an acceptable manner.</li> </ol> |
| Applicable Standards       | <p>To comply with the latest issue of SANS 726, Type 2, size B.</p> <p>Stainless steel must comply with the latest issue of SANS 417, subsection 4.1.2, proof of compliance must be submitted.</p> <p>Castors shall be in accordance with SANS 621 (see Special Conditions).</p>                                                                                                                                                                                                                                                                                                                                                                                                                                                                                                                                                                                                                                                                                                                                                                                                                                                                                                                                                                                          |
| Performance Specifications | <p>Shelf size 912x455mm (<math>\pm</math>5mm).</p> <p>Service life minimum 10 years.</p> <p>Must be cleanable and disinfectable with standard solutions.</p>                                                                                                                                                                                                                                                                                                                                                                                                                                                                                                                                                                                                                                                                                                                                                                                                                                                                                                                                                                                                                                                                                                              |
| Accessories                | None.                                                                                                                                                                                                                                                                                                                                                                                                                                                                                                                                                                                                                                                                                                                                                                                                                                                                                                                                                                                                                                                                                                                                                                                                                                                                     |
| Warranties                 | 2 years on all components.                                                                                                                                                                                                                                                                                                                                                                                                                                                                                                                                                                                                                                                                                                                                                                                                                                                                                                                                                                                                                                                                                                                                                                                                                                                |
| Instructions to Suppliers  | None.                                                                                                                                                                                                                                                                                                                                                                                                                                                                                                                                                                                                                                                                                                                                                                                                                                                                                                                                                                                                                                                                                                                                                                                                                                                                     |
| Note to Procurement        |                                                                                                                                                                                                                                                                                                                                                                                                                                                                                                                                                                                                                                                                                                                                                                                                                                                                                                                                                                                                                                                                                                                                                                                                                                                                           |

| Catalogue Number | Item Name                                      | Available on Transversal Contract | Contract Number or Code |
|------------------|------------------------------------------------|-----------------------------------|-------------------------|
| PHC-F-037        | <b><i>Trolley: medical dressing, small</i></b> | RT 24                             | RT 24-12-009            |

|                            |                                                                                                                                                                                                                                                                                                                                                                                                                                                                                                                                                                                                                                                                                                                                                                                                                                                                                                                                                                                                                                                                                                                                                                                                                                                                             |
|----------------------------|-----------------------------------------------------------------------------------------------------------------------------------------------------------------------------------------------------------------------------------------------------------------------------------------------------------------------------------------------------------------------------------------------------------------------------------------------------------------------------------------------------------------------------------------------------------------------------------------------------------------------------------------------------------------------------------------------------------------------------------------------------------------------------------------------------------------------------------------------------------------------------------------------------------------------------------------------------------------------------------------------------------------------------------------------------------------------------------------------------------------------------------------------------------------------------------------------------------------------------------------------------------------------------|
| Functional Specifications  | <p>Trolley, medical dressing, small.</p> <p>To comply with the latest issue of SANS 726 (see fig 4).</p> <p>Length: 455mm (<math>\pm</math> 5mm).</p> <p>Width: 455mm (<math>\pm</math> 5mm).</p> <p>The trolley is open and has two removable stainless steel shelves.</p> <p>Continuous guard rail on three sides of top shelf, and all four sides of bottom shelf.</p> <p>Durable rubber plugs (or similar noise reducing material) must be inserted into rails below removable shelves.</p> <p>It has a continuous guard rail along the sides and back of the top shelf and a continuous rail fitted around the bottom, above the bottom shelf.</p> <p>Materials which are easily cleaned and of lasting finish, and low noise generating nature, shall be used. Stainless steel throughout.</p> <p>Four swivel castors with a diameter of 75mm each. Where castors are fitted into steel tubular legs, the tube shall be of wall thickness not less than 2,0mm and castors shall be fixed to the tube by one of the following methods:</p> <ol style="list-style-type: none"> <li>Solid plug (long) complying with SANS 621 subsection 3.5.6 or</li> <li>Screwed into 35mm long sleeves welded into the tubular members and locked in an acceptable manner.</li> </ol> |
| Applicable Standards       | <p>To comply with the latest issue of SANS 726, Type 4, size C.</p> <p>Stainless steel must comply with the latest issue of SANS 417, subsection 4.1.2, proof of compliance must be submitted.</p> <p>Castors shall be in accordance with SANS 621 (see Special Conditions).</p>                                                                                                                                                                                                                                                                                                                                                                                                                                                                                                                                                                                                                                                                                                                                                                                                                                                                                                                                                                                            |
| Performance Specifications | <p>Shelf size 455x455mm (<math>\pm</math>5mm).</p> <p>Service life minimum 10 years.</p> <p>Must be cleanable and disinfected with standard solutions.</p>                                                                                                                                                                                                                                                                                                                                                                                                                                                                                                                                                                                                                                                                                                                                                                                                                                                                                                                                                                                                                                                                                                                  |
| Accessories                | None.                                                                                                                                                                                                                                                                                                                                                                                                                                                                                                                                                                                                                                                                                                                                                                                                                                                                                                                                                                                                                                                                                                                                                                                                                                                                       |
| Warranties                 | 2 years on all components.                                                                                                                                                                                                                                                                                                                                                                                                                                                                                                                                                                                                                                                                                                                                                                                                                                                                                                                                                                                                                                                                                                                                                                                                                                                  |
| Instructions to Suppliers  | None.                                                                                                                                                                                                                                                                                                                                                                                                                                                                                                                                                                                                                                                                                                                                                                                                                                                                                                                                                                                                                                                                                                                                                                                                                                                                       |
| Note to Procurement        |                                                                                                                                                                                                                                                                                                                                                                                                                                                                                                                                                                                                                                                                                                                                                                                                                                                                                                                                                                                                                                                                                                                                                                                                                                                                             |

| Catalogue Number | Item Name                                                               | Available on Transversal Contract | Contract Number or Code |
|------------------|-------------------------------------------------------------------------|-----------------------------------|-------------------------|
| PHC-F-044        | <b><i>Trolley: medical dressing with bucket and bowl attachment</i></b> | RT 24-2016                        | RT 24-12-010            |

|                            |                                                                                                                                                                                                                                                                                                                                                                                                                                                                                                                                                                                                                                                                                                                                                                                                                                                                                                                                                                                                                                                                                                                                                                                                                                                                                                                                                        |
|----------------------------|--------------------------------------------------------------------------------------------------------------------------------------------------------------------------------------------------------------------------------------------------------------------------------------------------------------------------------------------------------------------------------------------------------------------------------------------------------------------------------------------------------------------------------------------------------------------------------------------------------------------------------------------------------------------------------------------------------------------------------------------------------------------------------------------------------------------------------------------------------------------------------------------------------------------------------------------------------------------------------------------------------------------------------------------------------------------------------------------------------------------------------------------------------------------------------------------------------------------------------------------------------------------------------------------------------------------------------------------------------|
| Functional Specifications  | <p>Trolley, medical dressing with bucket and bowl attachment. Type 6. The trolley is open and has two removable stainless steel shelves. Durable rubber plugs (or similar noise reducing material) must be inserted into rails below removable shelves. It has a continuous top guard rail around the four sides. No guard rail on the bottom shelf. Bowl attachment (upper bracket) to accommodate a bowl (size 3) as per paragraphs 4 and 5.21 of SANS 417. Bucket attachment (lower bracket) to accommodate a 14l bucket as per paragraphs 4 and 5.18 of SANS 417. Materials which are easily cleaned and of lasting finish, and low noise generating nature, shall be used. Shelves to be of stainless steel. Stainless steel must comply with subsection 4.1.2 of the latest issue of SANS 417 (See special conditions), of compliance must be submitted. Four swivel castors with a diameter of 75 mm each. Castors shall be in accordance with SANS 621 (see Special Conditions). Where castors are fitted into steel tubular legs, the tube shall be of wall thickness not less than 2,0mm and castors shall be fixed to the tube by one of the following methods: i) Solid plug (long) complying with SANS 621 subsection 3.5.6 or ii) Screwed into 35mm long sleeves welded into the tubular members and locked in an acceptable manner.</p> |
| Applicable Standards       | <p>To comply with the latest issue of SANS 726 (see fig 6).<br/>SANS 417.<br/>SANS 621.<br/>Mild steel with epoxy/nylon powder-coated finish to comply with SANS 778 paragraph 5.2. (See Special Conditions). Proof of compliance must be submitted.</p>                                                                                                                                                                                                                                                                                                                                                                                                                                                                                                                                                                                                                                                                                                                                                                                                                                                                                                                                                                                                                                                                                               |
| Performance Specifications | Expected service life: 15 years.                                                                                                                                                                                                                                                                                                                                                                                                                                                                                                                                                                                                                                                                                                                                                                                                                                                                                                                                                                                                                                                                                                                                                                                                                                                                                                                       |
| Accessories                | Trolley to be supplied with a bucket and bowl as specified.                                                                                                                                                                                                                                                                                                                                                                                                                                                                                                                                                                                                                                                                                                                                                                                                                                                                                                                                                                                                                                                                                                                                                                                                                                                                                            |
| Warranties                 | 2 years.                                                                                                                                                                                                                                                                                                                                                                                                                                                                                                                                                                                                                                                                                                                                                                                                                                                                                                                                                                                                                                                                                                                                                                                                                                                                                                                                               |
| Instructions to Suppliers  |                                                                                                                                                                                                                                                                                                                                                                                                                                                                                                                                                                                                                                                                                                                                                                                                                                                                                                                                                                                                                                                                                                                                                                                                                                                                                                                                                        |
| Note to Procurement        |                                                                                                                                                                                                                                                                                                                                                                                                                                                                                                                                                                                                                                                                                                                                                                                                                                                                                                                                                                                                                                                                                                                                                                                                                                                                                                                                                        |

| Catalogue Number | Item Name                      | Available on Transversal Contract | Contract Number or Code |
|------------------|--------------------------------|-----------------------------------|-------------------------|
| PHC-F-051        | <b><i>Trolley: patient</i></b> | RT 24                             | RT 24-12-018            |

|                            |                                                                                                                                                                                                                                                                                                                                                                                                                                                                                                                                                                                                                                                                                                                                                                                                                                                                                                                                                                                                                                                                                                                                                                                                                                            |
|----------------------------|--------------------------------------------------------------------------------------------------------------------------------------------------------------------------------------------------------------------------------------------------------------------------------------------------------------------------------------------------------------------------------------------------------------------------------------------------------------------------------------------------------------------------------------------------------------------------------------------------------------------------------------------------------------------------------------------------------------------------------------------------------------------------------------------------------------------------------------------------------------------------------------------------------------------------------------------------------------------------------------------------------------------------------------------------------------------------------------------------------------------------------------------------------------------------------------------------------------------------------------------|
| Functional Specifications  | <p>Trolley, patient, with mattress.</p> <p>To comply with the latest issue of SANS 778. Type A (fig 1).</p> <p>Adjustable backrest with collapsible safety sides.</p> <p>Overall length of stretcher top: 2 060mm (± 5mm).</p> <p>Stainless steel top with a medium directional satin finish.</p> <p>Mild steel with epoxy/nylon powder-coated finish to comply with SANS 778 paragraph 5.2. (See Special Conditions).</p> <p>Proof of compliance must be submitted.</p> <p>Two hooks on the drip rod.</p> <p>Oxygen cylinder holder.</p> <p>Mounted on 4 heavy duty locking, swivel castors 125mm diameter, two swivel, two braking. Castors must be antistatic.</p> <p>Castors shall be in accordance with SANS 621 (see Special Conditions).</p> <p>Where castors are fitted into steel tubular legs, the tube shall be of wall thickness not less than 2,0mm and castors shall be fixed to the tube by one of the following methods:</p> <ul style="list-style-type: none"> <li>c. Solid plug (long) complying with SANS 621 subsection 3.5.6 or</li> <li>d. Screwed into 35mm long sleeves welded into the tubular members and locked in an acceptable manner.</li> </ul> <p><b>Mattress:</b> Must comply with item RT 24-12-019.</p> |
| Applicable Standards       | <p>Stainless steel must comply with subsection 4.1.2 of the latest issue of SANS 417 (See special conditions). Proof of compliance must be submitted.</p> <p>SANS 778 Type A, proof of compliance must be submitted.</p> <p>SANS 778 paragraph 5.2.</p>                                                                                                                                                                                                                                                                                                                                                                                                                                                                                                                                                                                                                                                                                                                                                                                                                                                                                                                                                                                    |
| Performance Specifications | <p>Must support a patient of 180Kg mass.</p> <p>Expected service life: 15 years.</p>                                                                                                                                                                                                                                                                                                                                                                                                                                                                                                                                                                                                                                                                                                                                                                                                                                                                                                                                                                                                                                                                                                                                                       |
| Accessories                | <p>Safety sides, drip rod, oxygen cylinder holder.</p> <p>Mattress for patient trolley PHC-F-052.</p> <p>Cover for Mattress PHC-F-053.</p>                                                                                                                                                                                                                                                                                                                                                                                                                                                                                                                                                                                                                                                                                                                                                                                                                                                                                                                                                                                                                                                                                                 |
| Warranties                 | <p>2 years.</p>                                                                                                                                                                                                                                                                                                                                                                                                                                                                                                                                                                                                                                                                                                                                                                                                                                                                                                                                                                                                                                                                                                                                                                                                                            |
| Instructions to Suppliers  | <p>None.</p>                                                                                                                                                                                                                                                                                                                                                                                                                                                                                                                                                                                                                                                                                                                                                                                                                                                                                                                                                                                                                                                                                                                                                                                                                               |
| Note to Procurement        | <p>Mattress RT 24-12-019 and mattress cover RT 24-12-019 in series with this item.</p>                                                                                                                                                                                                                                                                                                                                                                                                                                                                                                                                                                                                                                                                                                                                                                                                                                                                                                                                                                                                                                                                                                                                                     |

| Catalogue Number | Item Name                                                     | Available on Transversal Contract | Contract Number or Code |
|------------------|---------------------------------------------------------------|-----------------------------------|-------------------------|
| PHC-F-054        | <b><i>Trolley: soiled instruments and linen, complete</i></b> | RT 24-2016                        | RT 24-12-027            |

|                            |                                                                                                                                                                                                                                                                                                                                                                                                                                                                                                                                                                                                                                                                                                                                                                                                                                                                                                                                                                                                                                                                                                                                                                                                                                                                                                                                                                                                                                                                                                                                                                                                                                                                                                                                                                                                                                                                                                                      |
|----------------------------|----------------------------------------------------------------------------------------------------------------------------------------------------------------------------------------------------------------------------------------------------------------------------------------------------------------------------------------------------------------------------------------------------------------------------------------------------------------------------------------------------------------------------------------------------------------------------------------------------------------------------------------------------------------------------------------------------------------------------------------------------------------------------------------------------------------------------------------------------------------------------------------------------------------------------------------------------------------------------------------------------------------------------------------------------------------------------------------------------------------------------------------------------------------------------------------------------------------------------------------------------------------------------------------------------------------------------------------------------------------------------------------------------------------------------------------------------------------------------------------------------------------------------------------------------------------------------------------------------------------------------------------------------------------------------------------------------------------------------------------------------------------------------------------------------------------------------------------------------------------------------------------------------------------------|
| Functional Specifications  | <p>Trolley, soiled instruments and linen, complete with polyester linen receptacle.</p> <p>Mild steel with epoxy/nylon powder-coated finish to comply with SANS 778 paragraph 5.2. Proof of compliance must be submitted.</p> <p>The shelves shall be constructed of 1,2mm stainless steel sheeting.</p> <p>The shelves shall be shaped to fit neatly between the legs of the trolley and be supported on all sides by 15mm OD tubular rails.</p> <p>The shelves shall be free of sharp edges and shall be attached to the rails in a manner to eliminate vibrations between the shelves and the rails. The necessary fittings to achieve this shall be concealed.</p> <p>The bottom shelf shall extend all the way to the fifth leg as indicated in drawing SANS 896 and shall be braced by a 15mm OD transverse member between the other two legs forming a triangle to support the weight of the canvas receptacle.</p> <p>Polyester linen receptacle as per RT 24-12-028. The receptacles has eyelets for attachment to the frame, as well as a draw-cord and stitched-on handles.</p> <p><b>Size:</b> Diameter: 500mm (<math>\pm</math> 10mm).</p> <p><b>Height:</b> 800mm (<math>\pm</math> 10mm) including 100mm fold over lip.</p> <p>The trolley shall be fitted with 75mm diameter castors.</p> <p>Castors must comply with the latest issue of SANS 621, proof of compliance must be submitted.</p> <p>Where castors are fitted into steel tubular legs, the tube shall be of wall thickness not less than 2,0mm and castors shall be fixed to the tube by one of the following methods:</p> <ol style="list-style-type: none"> <li>Solid plug (long) complying with SANS 621 subsection 3.5.6</li> <li>Screwed into 35mm long sleeves welded into the tubular members and locked in an acceptable manner</li> <li>Rubber or plastic expanding sleeves for fitting castors are not acceptable.</li> </ol> |
| Applicable Standards       | <p>SANS 778 paragraph 5.2. Proof of compliance must be submitted.</p> <p>To comply with SANS 896 specifications.</p> <p>SANS 621, proof of compliance must be submitted.</p>                                                                                                                                                                                                                                                                                                                                                                                                                                                                                                                                                                                                                                                                                                                                                                                                                                                                                                                                                                                                                                                                                                                                                                                                                                                                                                                                                                                                                                                                                                                                                                                                                                                                                                                                         |
| Performance Specifications | <p>Cleanable with standard cleaning and disinfectant solutions.</p> <p>Washable receptacle.</p> <p>Expected service life: 15 years for trolley body.</p>                                                                                                                                                                                                                                                                                                                                                                                                                                                                                                                                                                                                                                                                                                                                                                                                                                                                                                                                                                                                                                                                                                                                                                                                                                                                                                                                                                                                                                                                                                                                                                                                                                                                                                                                                             |
| Accessories                | <p>Woven polyester linen receptacle PHC-F-055.</p>                                                                                                                                                                                                                                                                                                                                                                                                                                                                                                                                                                                                                                                                                                                                                                                                                                                                                                                                                                                                                                                                                                                                                                                                                                                                                                                                                                                                                                                                                                                                                                                                                                                                                                                                                                                                                                                                   |



|                           |                                                                                                                                      |
|---------------------------|--------------------------------------------------------------------------------------------------------------------------------------|
| Warranties                | 2 years.                                                                                                                             |
| Instructions to Suppliers |                                                                                                                                      |
| Note to Procurement       | Replacement linen receptacle RT 24-12-029 in series with this item, to use interchangeably with, or to replace, original receptacle. |

| Catalogue Number | Item Name                                     | Available on Transversal Contract | Contract Number or Code |
|------------------|-----------------------------------------------|-----------------------------------|-------------------------|
| PHC-F-056        | <b><i>Trolley: soiled linen, complete</i></b> | RT 24-2016                        | RT 24-12-030            |

|                            |                                                                                                                                                                                                                                                                                                                                                                                                                                                                                                                                                                                                                                                                                                                                                                                                                          |
|----------------------------|--------------------------------------------------------------------------------------------------------------------------------------------------------------------------------------------------------------------------------------------------------------------------------------------------------------------------------------------------------------------------------------------------------------------------------------------------------------------------------------------------------------------------------------------------------------------------------------------------------------------------------------------------------------------------------------------------------------------------------------------------------------------------------------------------------------------------|
| Functional Specifications  | <p>Castor-mounted, epoxy-coated mild-steel trolley.</p> <p>Vertical members support a horizontal circular or square frame, onto which a woven polyester soiled linen receptacle attaches.</p> <p>The receptacles has eyelets for attachment to the frame, as well as a draw-cord and stitched-on handles.</p> <p>Where castors are fitted into steel tubular legs, the tube shall be of wall thickness not less than 2,0mm and castors shall be fixed to the tube by one of the following methods:</p> <ol style="list-style-type: none"> <li>Solid plug (long) complying with SANS 621 subsection 3.5.6; or</li> <li>Screwed into 35mm long sleeves welded into the tubular members and locked in an acceptable manner.</li> </ol> <p>(Rubber or plastic expanding sleeves for fitting castors are not acceptable.)</p> |
| Applicable Standards       | <p>SANS 778 paragraph 5.2, Proof of compliance must be submitted.</p> <p>SANS 896, Type A.</p> <p>SANS 621, proof of compliance must be submitted.</p>                                                                                                                                                                                                                                                                                                                                                                                                                                                                                                                                                                                                                                                                   |
| Performance Specifications | <p>Cleanable with standard cleaning and disinfectant solutions.</p> <p>Expected service life: 15 years for trolley body.</p>                                                                                                                                                                                                                                                                                                                                                                                                                                                                                                                                                                                                                                                                                             |
| Accessories                | Woven polyester linen receptacle PHC-F-057.                                                                                                                                                                                                                                                                                                                                                                                                                                                                                                                                                                                                                                                                                                                                                                              |
| Warranties                 | 2 years.                                                                                                                                                                                                                                                                                                                                                                                                                                                                                                                                                                                                                                                                                                                                                                                                                 |
| Instructions to Suppliers  |                                                                                                                                                                                                                                                                                                                                                                                                                                                                                                                                                                                                                                                                                                                                                                                                                          |
| Note to Procurement        | Replacement linen receptacle RT 24-12-031 in series with this item, to use interchangeably with, or to replace, original receptacle.                                                                                                                                                                                                                                                                                                                                                                                                                                                                                                                                                                                                                                                                                     |

| Catalogue Number | Item Name                                     | Available on Transversal Contract | Contract Number or Code |
|------------------|-----------------------------------------------|-----------------------------------|-------------------------|
| PHC-F-042        | <b><i>X-Ray viewing box: wall mounted</i></b> | RT 24                             | RT 24-12-013            |

|                            |                                                                                                                                                                                                                                                                                                                                                                                                                                                |
|----------------------------|------------------------------------------------------------------------------------------------------------------------------------------------------------------------------------------------------------------------------------------------------------------------------------------------------------------------------------------------------------------------------------------------------------------------------------------------|
| Functional Specifications  | <p>Viewing boxes for viewing radiographic images:</p> <p>White powder-coated steel box, fitted with keyhole slots for wall mounting</p> <p>1/2 fluorescent tubes, built-in high intensity bulb (100W or equiv. globe to be fitted), separate switches for normal and sharp lights spring-loaded film clips</p> <p>Size: to fit 1x(350x430mm) film</p> <p>Power cord 3 metres fixed to box, ending in moulded SABS approved 15A 3-pin plug.</p> |
| Applicable Standards       | None available.                                                                                                                                                                                                                                                                                                                                                                                                                                |
| Performance Specifications | Brightness 1 700 nit min 1 500 nit.                                                                                                                                                                                                                                                                                                                                                                                                            |
| Accessories                | None.                                                                                                                                                                                                                                                                                                                                                                                                                                          |
| Warranties                 | 1 year.                                                                                                                                                                                                                                                                                                                                                                                                                                        |
| Instructions to Suppliers  | Supplier to deliver, mount, connect to electricity supply.                                                                                                                                                                                                                                                                                                                                                                                     |
| Note to Procurement        | None.                                                                                                                                                                                                                                                                                                                                                                                                                                          |

| Catalogue Number | Item Name                        | Available on Transversal Contract | Contract Number or Code |
|------------------|----------------------------------|-----------------------------------|-------------------------|
| PHC-F-024        | <b><i>Wheelchair: porter</i></b> | RT 233-2017                       | 42192210-00259          |

|                            |                                                        |
|----------------------------|--------------------------------------------------------|
| Functional Specifications  | Porter chair for institutional use.<br>Size 51cm wide. |
| Applicable Standards       | Technical spec 1.12.1 of RT 2-2016.                    |
| Performance Specifications | Expected service life: 10 years.                       |
| Accessories                |                                                        |
| Warranties                 | 2 years.                                               |
| Instructions to Suppliers  |                                                        |
| Note to Procurement        |                                                        |

## General

| Catalogue Number | Item Name                             | Available on Transversal Contract | Contract Number or Code |
|------------------|---------------------------------------|-----------------------------------|-------------------------|
| PHC-F-001        | <b><i>Chair: office, mid-back</i></b> | No                                |                         |

|                            |                                                                                                                                                                                                                                                                                                                                                                                                                                                                                                                                                                                                                                                                                                                                                                                                                                                                                                                                                                                                                                                                                                                                                                                                     |
|----------------------------|-----------------------------------------------------------------------------------------------------------------------------------------------------------------------------------------------------------------------------------------------------------------------------------------------------------------------------------------------------------------------------------------------------------------------------------------------------------------------------------------------------------------------------------------------------------------------------------------------------------------------------------------------------------------------------------------------------------------------------------------------------------------------------------------------------------------------------------------------------------------------------------------------------------------------------------------------------------------------------------------------------------------------------------------------------------------------------------------------------------------------------------------------------------------------------------------------------|
| Functional Specifications  | <p>Must comply with SANS 660:12, with the following additions/modifications:</p> <p>Chair manufactured from epoxy powder-coated mild steel frame without arm rests. Chair to swivel and tilt. Chair to be fitted with a “synchro” mechanism, adjustable for user up to 200kg. Height-adjustable with heavy-duty gas strut</p> <p>Base: Mounted on a five-star (5) cast alloy (chromed or black powder coated) base. High-impact ABS or reinforced nylon/plastic will be considered, if of same strength as cast alloy (evidence to be provided). Base to be fitted with heavy duty double-wheel casters. Casters must fit securely and not fall out of base after prolonged use. Supplier to specify fixing method</p> <p>Chair to have fully moulded shell. Chair to have a durable polyurethane back in black mesh. Mesh to be moulded in a frame, replaceable</p> <p>Chair back to be of high type</p> <p>The seat of the chair to be well upholstered in heavy-duty foam and covered with heavy duty impervious, easily-cleanable synthetic material. Upholstery material must be resistant to common cleaning agents, and to dilute 10% glutaraldehyde solution. Seat must be replaceable.</p> |
| Applicable Standards       | SANS 660:12, as modified herein.                                                                                                                                                                                                                                                                                                                                                                                                                                                                                                                                                                                                                                                                                                                                                                                                                                                                                                                                                                                                                                                                                                                                                                    |
| Performance Specifications | <p>Chair must support a body weight of 200 kg without flexing or deforming. Arm rests must not splay, loosen or break off when a heavy occupant leans on them to rise up.</p> <p>Expected service life of at least 5 years.</p> <p>Must be cleanable and disinfectable with standard solutions.</p>                                                                                                                                                                                                                                                                                                                                                                                                                                                                                                                                                                                                                                                                                                                                                                                                                                                                                                 |
| Accessories                |                                                                                                                                                                                                                                                                                                                                                                                                                                                                                                                                                                                                                                                                                                                                                                                                                                                                                                                                                                                                                                                                                                                                                                                                     |
| Warranties                 | <p>Guarantee on seat: 2 years.</p> <p>Guarantee on frame and back: 5 years.</p> <p>Spares availability must be guaranteed for minimum of 5 years.</p>                                                                                                                                                                                                                                                                                                                                                                                                                                                                                                                                                                                                                                                                                                                                                                                                                                                                                                                                                                                                                                               |
| Instructions to Suppliers  | <p>Supplier to indicate available colours.</p> <p>Supplier to indicate what spare parts are available, with pricing.</p> <p>Supplier to deliver and train users on adjustments.</p>                                                                                                                                                                                                                                                                                                                                                                                                                                                                                                                                                                                                                                                                                                                                                                                                                                                                                                                                                                                                                 |
| Note to Procurement        | None.                                                                                                                                                                                                                                                                                                                                                                                                                                                                                                                                                                                                                                                                                                                                                                                                                                                                                                                                                                                                                                                                                                                                                                                               |

| Catalogue Number | Item Name                                | Available on Transversal Contract | Contract Number or Code |
|------------------|------------------------------------------|-----------------------------------|-------------------------|
| PHC-F-002        | <b><i>Chair: operator, high back</i></b> | No                                |                         |

|                            |                                                                                                                                                                                                                                                                                                                                                                                                                                                                                                                                                                                                                                                                                                                                                                                                                                                                                                                                                                                                                                                                                                                                                                                                               |
|----------------------------|---------------------------------------------------------------------------------------------------------------------------------------------------------------------------------------------------------------------------------------------------------------------------------------------------------------------------------------------------------------------------------------------------------------------------------------------------------------------------------------------------------------------------------------------------------------------------------------------------------------------------------------------------------------------------------------------------------------------------------------------------------------------------------------------------------------------------------------------------------------------------------------------------------------------------------------------------------------------------------------------------------------------------------------------------------------------------------------------------------------------------------------------------------------------------------------------------------------|
| Functional Specifications  | <p>Must comply with SANS 660:12, with the following additions/modifications:</p> <p>Chair manufactured from epoxy powder-coated mild steel frame with adjustable arm rests. Chair to swivel and tilt. Chair to be fitted with a “synchro” mechanism, adjustable for user up to 200kg</p> <p>Height-adjustable with heavy-duty gas strut</p> <p>Base: Mounted on a five-star cast alloy (chromed or black powder coated) base. High-impact ABS or reinforced nylon/plastic will be considered, if of same strength as cast alloy (evidence to be provided). Base to be fitted with heavy duty double-wheel casters. Casters must fit securely and not fall out of base after prolonged use. Supplier to specify fixing method</p> <p>Chair to have fully moulded shell. Chair to have a durable polyurethane back in black mesh. Mesh to be moulded in a frame, replaceable</p> <p>Chair back to be of high type</p> <p>The seat of the chair to be well upholstered in heavy-duty foam and covered with heavy duty impervious, easily-cleanable synthetic material. Upholstery material must be resistant to common cleaning agents, and to dilute 10% glutaraldehyde solution. Seat must be replaceable.</p> |
| Applicable Standards       | SANS 660:12, as modified herein.                                                                                                                                                                                                                                                                                                                                                                                                                                                                                                                                                                                                                                                                                                                                                                                                                                                                                                                                                                                                                                                                                                                                                                              |
| Performance Specifications | <p>Chair must support a body weight of 200 kg without flexing or deforming. Arm rests must not splay, loosen or break off when a heavy occupant leans on them to rise up.</p> <p>Expected service life of at least 5 years.</p> <p>Must be cleanable and disinfectable with standard solutions.</p>                                                                                                                                                                                                                                                                                                                                                                                                                                                                                                                                                                                                                                                                                                                                                                                                                                                                                                           |
| Accessories                |                                                                                                                                                                                                                                                                                                                                                                                                                                                                                                                                                                                                                                                                                                                                                                                                                                                                                                                                                                                                                                                                                                                                                                                                               |
| Warranties                 | <p>Guarantee on seat: 2 years.</p> <p>Guarantee on frame and back: 5 years.</p> <p>Spares availability must be guaranteed for minimum of 5 years.</p>                                                                                                                                                                                                                                                                                                                                                                                                                                                                                                                                                                                                                                                                                                                                                                                                                                                                                                                                                                                                                                                         |
| Instructions to Suppliers  | <p>Supplier to indicate available colours.</p> <p>Supplier to indicate what spare parts are available, with pricing.</p> <p>Supplier to deliver and train users on adjustments.</p>                                                                                                                                                                                                                                                                                                                                                                                                                                                                                                                                                                                                                                                                                                                                                                                                                                                                                                                                                                                                                           |
| Note to Procurement        | None.                                                                                                                                                                                                                                                                                                                                                                                                                                                                                                                                                                                                                                                                                                                                                                                                                                                                                                                                                                                                                                                                                                                                                                                                         |

| Catalogue Number | Item Name                                 | Available on Transversal Contract | Contract Number or Code |
|------------------|-------------------------------------------|-----------------------------------|-------------------------|
| PHC-F-003        | <b><i>Chair: stackable, ABS shell</i></b> | No                                |                         |

|                            |                                                                                                                                                                                                                                                                                                                                                                                                                                                                                         |
|----------------------------|-----------------------------------------------------------------------------------------------------------------------------------------------------------------------------------------------------------------------------------------------------------------------------------------------------------------------------------------------------------------------------------------------------------------------------------------------------------------------------------------|
| Functional Specifications  | <p>Must comply with SANS 660:12, with the following additions/modifications:</p> <p>The chair to be manufactured from mild steel tubing, which is to be chrome or black powder-coated epoxy-finished, with replaceable plastic anti-scratch anti-noise protector clips</p> <p>The frame should preferably be of the sled type, anti-tilt in normal usage</p> <p>No arms</p> <p>Stackable design preferred</p> <p>Chair to have fully moulded shell</p> <p>Seat must be replaceable.</p> |
| Applicable Standards       | SANS 660:12, as modified herein.                                                                                                                                                                                                                                                                                                                                                                                                                                                        |
| Performance Specifications | <p>Chair must support a body weight of 200 kg without flexing or deforming.</p> <p>Expected service life of at least 5 years.</p> <p>Must be cleanable and disinfected with standard solutions.</p>                                                                                                                                                                                                                                                                                     |
| Accessories                |                                                                                                                                                                                                                                                                                                                                                                                                                                                                                         |
| Warranties                 | <p>Guarantee on frame and back: 5 years.</p> <p>Spares availability must be guaranteed for minimum of 5 years.</p>                                                                                                                                                                                                                                                                                                                                                                      |
| Instructions to Suppliers  | <p>Supplier to indicate available colours.</p> <p>Supplier to indicate what spare parts are available, with pricing.</p>                                                                                                                                                                                                                                                                                                                                                                |
| Note to Procurement        | None.                                                                                                                                                                                                                                                                                                                                                                                                                                                                                   |

| Catalogue Number | Item Name                                        | Available on Transversal Contract | Contract Number or Code |
|------------------|--------------------------------------------------|-----------------------------------|-------------------------|
| PHC-F-004        | <b><i>Chair: stackable, netted, mid-back</i></b> | No                                |                         |

|                            |                                                                                                                                                                                                                                                                                                                                                                                                                                                                                                                                                                                                                                                                                                                                                                                                                    |
|----------------------------|--------------------------------------------------------------------------------------------------------------------------------------------------------------------------------------------------------------------------------------------------------------------------------------------------------------------------------------------------------------------------------------------------------------------------------------------------------------------------------------------------------------------------------------------------------------------------------------------------------------------------------------------------------------------------------------------------------------------------------------------------------------------------------------------------------------------|
| Functional Specifications  | <p>Must comply with SANS 660:12, with the following additions/modifications:</p> <p>The chair to be manufactured from mild steel tubing, which is to be chrome or black powder-coated epoxy-finished, with replaceable plastic anti-scratch anti-noise protector clips</p> <p>The frame should preferably be of the sled type, anti-tilt in normal usage</p> <p>No arms</p> <p>Stackable design preferred</p> <p>The seat of the chair to be well upholstered in heavy-duty foam and covered with heavy duty impervious, easily-cleanable synthetic material. Upholstery material must be resistant to common cleaning agents, and to dilute 10% glutaraldehyde solution. Seat must be replaceable</p> <p>Chair to have a durable polyurethane back in black mesh. Mesh to be moulded in a frame, replaceable.</p> |
| Applicable Standards       | SANS 660:12, as modified herein.                                                                                                                                                                                                                                                                                                                                                                                                                                                                                                                                                                                                                                                                                                                                                                                   |
| Performance Specifications | <p>Chair must support a body weight of 200 kg without flexing or deforming.</p> <p>Expected service life of at least 5 years.</p> <p>Must be cleanable and disinfectable with standard solutions.</p>                                                                                                                                                                                                                                                                                                                                                                                                                                                                                                                                                                                                              |
| Accessories                |                                                                                                                                                                                                                                                                                                                                                                                                                                                                                                                                                                                                                                                                                                                                                                                                                    |
| Warranties                 | <p>Guarantee on frame and back: 5 years.</p> <p>Spares availability must be guaranteed for minimum of 5 years.</p>                                                                                                                                                                                                                                                                                                                                                                                                                                                                                                                                                                                                                                                                                                 |
| Instructions to Suppliers  | <p>Supplier to indicate available colours.</p> <p>Supplier to indicate what spare parts are available, with pricing.</p>                                                                                                                                                                                                                                                                                                                                                                                                                                                                                                                                                                                                                                                                                           |
| Note to Procurement        | None.                                                                                                                                                                                                                                                                                                                                                                                                                                                                                                                                                                                                                                                                                                                                                                                                              |



| Catalogue Number | Item Name                              | Available on Transversal Contract | Contract Number or Code |
|------------------|----------------------------------------|-----------------------------------|-------------------------|
| PHC-F-005        | <b><i>Chair: visitor, mid back</i></b> | No                                |                         |

|                            |                                                                                                                                                                                                                                                                                                                                                                                                                                                                                                                                                                                                                                                                                                                                                                                                                                                             |
|----------------------------|-------------------------------------------------------------------------------------------------------------------------------------------------------------------------------------------------------------------------------------------------------------------------------------------------------------------------------------------------------------------------------------------------------------------------------------------------------------------------------------------------------------------------------------------------------------------------------------------------------------------------------------------------------------------------------------------------------------------------------------------------------------------------------------------------------------------------------------------------------------|
| Functional Specifications  | <p>Must comply with SANS 660:12, with the following additions/modifications:</p> <p>The chair to be manufactured from mild steel tubing, which is to be chrome or black powder-coated epoxy-finished, with replaceable plastic anti-scratch anti-noise protector clips. The frame should preferably be of the sled type, anti-tilt in normal usage</p> <p>No arms</p> <p>Stackable design preferred</p> <p>Chair to have fully moulded shell. Chair to have a durable polyurethane upholstered back in black mesh. Mesh to be moulded in a frame, replaceable</p> <p>The seat of the chair to be well upholstered in heavy-duty foam and covered with heavy duty impervious, easily-cleanable synthetic material. Upholstery material must be resistant to common cleaning agents, and to dilute 10% glutaraldehyde solution. Seat must be replaceable.</p> |
| Applicable Standards       | SANS 660:12, as modified herein.                                                                                                                                                                                                                                                                                                                                                                                                                                                                                                                                                                                                                                                                                                                                                                                                                            |
| Performance Specifications | <p>Chair must support a body weight of 200 kg without flexing or deforming.</p> <p>Expected service life of at least 5 years.</p> <p>Must be cleanable and disinfectable with standard solutions.</p>                                                                                                                                                                                                                                                                                                                                                                                                                                                                                                                                                                                                                                                       |
| Accessories                |                                                                                                                                                                                                                                                                                                                                                                                                                                                                                                                                                                                                                                                                                                                                                                                                                                                             |
| Warranties                 | <p>Guarantee on seat 2 years.</p> <p>Guarantee on frame and back: 5 years.</p> <p>Spares availability must be guaranteed for minimum of 5 years.</p>                                                                                                                                                                                                                                                                                                                                                                                                                                                                                                                                                                                                                                                                                                        |
| Instructions to Suppliers  | <p>Supplier to indicate available colours.</p> <p>Supplier to indicate what spare parts are available, with pricing.</p>                                                                                                                                                                                                                                                                                                                                                                                                                                                                                                                                                                                                                                                                                                                                    |
| Note to Procurement        | None.                                                                                                                                                                                                                                                                                                                                                                                                                                                                                                                                                                                                                                                                                                                                                                                                                                                       |

| Catalogue Number | Item Name       | Available on Transversal Contract | Contract Number or Code |
|------------------|-----------------|-----------------------------------|-------------------------|
| PHC-F-006        | <b>Credenza</b> | No                                |                         |

|                            |                                                                                                                                                                                                                                                                                                                                                                                                                                                                                                                                                                                                                                                                                                                                                                                                                                                                                                                                                                                                                                                                                                                                                                                                                                                                                                                                                                                                                                                                                                                                                                                                                                                                                                                                                                                                                                                                                                                                                  |
|----------------------------|--------------------------------------------------------------------------------------------------------------------------------------------------------------------------------------------------------------------------------------------------------------------------------------------------------------------------------------------------------------------------------------------------------------------------------------------------------------------------------------------------------------------------------------------------------------------------------------------------------------------------------------------------------------------------------------------------------------------------------------------------------------------------------------------------------------------------------------------------------------------------------------------------------------------------------------------------------------------------------------------------------------------------------------------------------------------------------------------------------------------------------------------------------------------------------------------------------------------------------------------------------------------------------------------------------------------------------------------------------------------------------------------------------------------------------------------------------------------------------------------------------------------------------------------------------------------------------------------------------------------------------------------------------------------------------------------------------------------------------------------------------------------------------------------------------------------------------------------------------------------------------------------------------------------------------------------------|
| Functional Specifications  | <p>Credenza to complement the L-shaped desk PHC-F-007.</p> <p><b>Carcass and doors:</b> Particleboard or medium density fibreboard, 16mm, clad in continuous decorative laminate. To be edge-banded in same material.</p> <p>Doors to be edged (see edging, below), 2mm edging</p> <p>Doors may be sliding type, in inlaid top and bottom rails, or hinged (Euro-hinge 35mm, inset type)</p> <p>Two clad shelves, adjustable spacing.</p> <p><b>Worktop to match that of desk:</b></p> <p><b>Material:</b> Tops to be constructed of either moisture resistant particleboard (must comply with SABS EN 312-5: 2003, proof to be supplied) or medium density fibreboard (must comply with SABS 540-1: 1991, proof to be supplied). 20-22mm thickness preferred</p> <p><b>Work surface:</b> continuous decorative laminate, at least 0.8mm thick, complying with general purpose laminates, SANS 4586-2, bonded to the substrate. A high-pressure laminate may be proposed. Pale grey colour preferred, supplier to provide samples. Abrasion test results as per CKS 36:2004 or equivalent, to be supplied. The worktops are to be counter-laminated on the inferior surface</p> <p><b>Edging:</b> Polyurethane or high-impact thermoplastic. No self-adhesive laminate edging. At least 4mm thick. Rectangular cross-section preferred, to minimise gap when the two tops are placed in contiguity. Edging must be securely adhered to the substrate, without visible glue line, gaps or protruding edges. Edging (and the adhesive joint) must be impact-, water-, and heat-resistant, at upper and lower joints with laminate. Colour of edging may be different to colour of top laminate – supplier to provide colour range available</p> <p><b>Door handles:</b> simple, minimally-protruding type, suitable for operation with gloved hands. Non-corrosive, resistant to disinfectants. Wooden knobs and cheap plastic not acceptable.</p> |
| Applicable Standards       | <p>Compliance with SANS 660:2012 is required, with particular reference to strength and impact requirements.</p> <p>SABS EN 312-5: 2003.</p> <p>SABS 540-1: 1991.</p> <p>General Purpose laminates, SANS 4586-2.</p> <p>CKS 36:2004 or equivalent.</p> <p>Fittings, fasteners, clips, locks, rivets, washers, must comply with SANS 135 or equivalent.</p>                                                                                                                                                                                                                                                                                                                                                                                                                                                                                                                                                                                                                                                                                                                                                                                                                                                                                                                                                                                                                                                                                                                                                                                                                                                                                                                                                                                                                                                                                                                                                                                       |
| Performance Specifications | <p>Approximately 900mm wide by 450mm deep. Height to be same as desk.</p> <p>Must be cleanable and disinfectable with standard solutions.</p> <p>A minimum 10-year service life is desired.</p>                                                                                                                                                                                                                                                                                                                                                                                                                                                                                                                                                                                                                                                                                                                                                                                                                                                                                                                                                                                                                                                                                                                                                                                                                                                                                                                                                                                                                                                                                                                                                                                                                                                                                                                                                  |

|                           |                                                                                                                                                                            |
|---------------------------|----------------------------------------------------------------------------------------------------------------------------------------------------------------------------|
| Accessories               | The unit to be supplied with a key and a spare key.                                                                                                                        |
| Warranties                | Minimum guarantee 5 years on all components. Spares availability guaranteed for minimum of 5 years.                                                                        |
| Instructions to Suppliers | Supplier to deliver and assemble.                                                                                                                                          |
| Note to Procurement       | These specifications are superior to the quality generally available at discount retail outlets. Inferior construction and materials, lead to vastly reduced service life. |

| Catalogue Number | Item Name                             | Available on Transversal Contract | Contract Number or Code |
|------------------|---------------------------------------|-----------------------------------|-------------------------|
| PHC-F-007        | <b><i>Desk: L-shape, 3-drawer</i></b> | No                                |                         |
|                  |                                       |                                   |                         |

## Functional Specifications

Asymmetrical L-shaped desk, which can be configured for R- or L-handed orientation. Preference is for two individual tops, but single work surface can be proposed.

**Frame:**

Desk to have a self-supporting, metal frame. Tops must not form part of structural integrity. Frame of mild steel, epoxy powder-coated (comply with Type 2 of SANS 1274). Supplier to specify steel thickness. Preference is for open frame with individual legs at ground level, for easy floor cleaning. Legs to have suitable durable plugs and/or ferrules, with adequate capacity for levelling. Plug/Ferrule material must withstand normal cleaning materials used on flooring, as well as diluted bleach and 10% glutaraldehyde solution. Ferrules and levellers must be non-staining, non-corroding, non-rusting. If two separate frames are proposed, design must be such that user can swivel from side to side without obstruction, when frames are combined into L-shape.

**Worktops:**

**Material:** tops to be constructed of either moisture resistant particleboard (must comply with SABS EN 312-5: 2003, proof to be supplied) or medium density fibreboard (must comply with SABS 540-1: 1991, proof to be supplied). 20-22mm thickness preferred

**Work surface:** to be continuous decorative laminate, at least 0.8mm thick, complying with General Purpose laminates, SANS 4586-2, bonded to the substrate. A high-pressure laminate may be proposed. Pale grey colour preferred, supplier to provide samples. Abrasion test results as per CKS 36:2004 or equivalent, to be supplied. The worktops are to be counter-laminated on the inferior surface

**Edging:** Polyurethane or high-impact thermoplastic. No self-adhesive laminate edging. At least 4mm thick. Rectangular cross-section preferred, to minimise gap when the two tops are placed in contiguity. Edging must be securely adhered to the substrate, without visible glue line, gaps or protruding edges. Edging (and the adhesive joint) must be impact-, water-, and heat-resistant, at upper and lower joints with laminate. Colour of edging may be different to colour of top laminate – supplier to provide colour range available

**Modesty panels:** desk to have modesty panels for one long and one short length of the small unit (800x600). Supplier to propose material and available colours

**Drawer unit:** three- drawer fitted unit, (to mount under the left or right side of the longer top). Carcass of laminated particleboard or MDF, to match colour of worktop laminate. Carcass preferably to be affixed to steel frame

**Drawer construction:** epoxy-coated steel sides with integral roller runners and laminated board front preferred, but all laminated board construction with metal roller runners will be considered. Colour of drawer front may differ from colour of carcass. Supplier to provide samples of options. Drawer fronts may be fully recessed (preferred) or overlay. Drawer fronts to have durable edging. Top drawer to be lockable, supplied with two keys. Top drawer to have a pen and pencil storage tray. Top drawer 85mm side, remaining two drawers 150mm sides. Base of drawer minimum 16mm laminated particleboard, not 4mm hardboard. Drawer pulls must be of simple, minimally-protruding type, suitable for operation with gloved hands. Non-corrosive, resistant to disinfectants. Wooden knobs and cheap plastic not acceptable.

|                            |                                                                                                                                                                                                                                                                                                                                                                                                                                                                                             |
|----------------------------|---------------------------------------------------------------------------------------------------------------------------------------------------------------------------------------------------------------------------------------------------------------------------------------------------------------------------------------------------------------------------------------------------------------------------------------------------------------------------------------------|
| Applicable Standards       | <p>Compliance with SANS 660:2012 is required, with particular reference to strength and impact requirements.</p> <p>Epoxy coating to comply with Type 2 of SANS 1274.</p> <p>SABS EN 312-5: 2003.</p> <p>SABS 540-1: 1991.</p> <p>General Purpose laminates, SANS 4586-2.</p> <p>CKS 36:2004 or equivalent.</p> <p>Fittings, fasteners, clips, locks, rivets, washers, must comply with SANS 135 or equivalent.</p>                                                                         |
| Performance Specifications | <p><b>Worktops:</b> Dimensions: 1x 000mmx600mmx35mm rectangular top and 1x800x600 rectangular top, when fitted together will form an “L” shaped workstation. Overall height (on frame): 720-750mm.</p> <p>Must be cleanable and disinfected with standard solutions.</p> <p>A minimum 10-year service life is desired.</p>                                                                                                                                                                  |
| Accessories                | <p>The unit to be supplied with a key and a spare key.</p> <p>Pen and pencil storage tray.</p>                                                                                                                                                                                                                                                                                                                                                                                              |
| Warranties                 | <p>Minimum guarantee 5 years on all components. Spares availability guaranteed for minimum of 5 years.</p>                                                                                                                                                                                                                                                                                                                                                                                  |
| Instructions to Suppliers  | <p><b>Note:</b> for infection control purposes, the desk must be fixed in position. Provision must be made for brackets to fix a long edge of the larger worktop to a wall. The brackets may be part of the frame, or may attach under the worktop, depending on design. Brackets must not interfere with positioning of drawer unit. Supplier to supply brackets if not part of the construction, at no additional cost.</p> <p>Supplier to deliver and assemble, but not fix to wall.</p> |
| Note to Procurement        | <p>These specifications are superior to the quality generally available at discount retail outlets. Inferior construction and materials, lead to vastly reduced service life.</p>                                                                                                                                                                                                                                                                                                           |

| Catalogue Number | Item Name                | Available on Transversal Contract | Contract Number or Code |
|------------------|--------------------------|-----------------------------------|-------------------------|
| PHC-F-008        | <b>Desk, rectangular</b> | No                                |                         |

## Functional Specifications

Simple rectangular desk (optionally, one short edge may be curved, with radius = one-half of width).

**Frame:** Desk to have a self-supporting metal frame – tops must not form part of structural integrity. Frame of mild steel, epoxy powder-coated (comply with Type 2 of SANS 1274). Supplier to specify steel thickness. Preference is for open frame with individual legs at ground level, for easy floor cleaning. Legs to have suitable durable plugs and/or ferrules, with adequate capacity for levelling. Plug/Ferrule material must withstand normal cleaning materials used on flooring, as well as diluted bleach and 10% glutaraldehyde solution. Ferrules and levellers must be non-staining, non-corroding, non-rusting.

**Worktops:**

**Material:** tops are to be constructed of either moisture resistant particleboard (must comply with SABS EN 312-5: 2003, proof to be supplied) or medium density fibreboard (must comply with SABS 540-1: 1991, proof to be supplied). 20-22mm thickness preferred

**Work surface** to be continuous decorative laminate, at least 0.8mm thick, complying with general purpose laminates, SANS 4586-2, bonded to the substrate. A high- pressure laminate may be proposed. Pale grey colour preferred, supplier to provide samples. Abrasion test results as per CKS 36:2004 or equivalent, to be supplied. The worktops are to be counter-laminated on the inferior surface

**Edging:** Polyurethane or high-impact thermoplastic. No self-adhesive laminate edging. At least 4mm thick. Rectangular cross-section preferred, to minimise gap when the two tops are placed in contiguity. Edging must be securely adhered to the substrate, without visible glue line, gaps or protruding edges. Edging (and the adhesive joint) must be impact, water, and heat resistant, at upper and lower joints with laminate. Colour of edging may be different to colour of top laminate – supplier to provide colour range available

**Modesty panels:** desk to have modesty panels for one long and one short length of the unit (800x600). Supplier to propose material and available colours (may or may not be same as top work surface)

**Drawers:** two, approximately 150mm depth, approximately 400mm wide, suspended side-by-side under top or attached to frame. Can be all-steel epoxy-coated construction, on roller or ball-bearing slides. Base of drawer minimum 16mm laminated particleboard, not 4mm hardboard. Drawer pulls must be of simple, minimally-protruding type, suitable for operation with gloved hands. Non-corrosive, resistant to disinfectants. Wooden knobs and cheap plastic not acceptable.

|                            |                                                                                                                                                                                                                                                                                                                                                                                                                                                                                              |
|----------------------------|----------------------------------------------------------------------------------------------------------------------------------------------------------------------------------------------------------------------------------------------------------------------------------------------------------------------------------------------------------------------------------------------------------------------------------------------------------------------------------------------|
| Applicable Standards       | <p>Compliance with SANS 660:2012 is required, with particular reference to strength and impact requirements.</p> <p>Epoxy coating to comply with Type 2 of SANS 1274.</p> <p>SABS EN 312-5: 2003.</p> <p>SABS 540-1: 1991.</p> <p>General Purpose laminates, SANS 4586-2.</p> <p>CKS 36:2004 or equivalent.</p> <p>Fittings, fasteners, clips, locks, rivets, washers, must comply with SANS 135 or equivalent.</p>                                                                          |
| Performance Specifications | <p><b>Worktops:</b> Dimensions: 1 000x600 rectangular top. Overall height (on frame): 720-750mm.</p> <p>Must be cleanable and disinfectable with standard solutions.</p> <p>A minimum 10-year service life is desired.</p>                                                                                                                                                                                                                                                                   |
| Accessories                | <p>The unit to be supplied with a key and a spare key.</p> <p>Pen and pencil storage tray.</p>                                                                                                                                                                                                                                                                                                                                                                                               |
| Warranties                 | <p>Minimum 5 years on all components. Spares availability guaranteed for minimum of 5 years.</p>                                                                                                                                                                                                                                                                                                                                                                                             |
| Instructions to Suppliers  | <p><b>Note:</b> for infection control purposes, the desk must be fixed in position. Provision must be made for brackets to fix a short edge of the worktop to a wall. The brackets may be part of the frame, or may attach under the worktop, depending on design. Brackets must not interfere with positioning of drawer unit.</p> <p>Supplier to supply brackets if not part of the construction, at no additional cost.</p> <p>Supplier to deliver and assemble, but not fix to wall.</p> |
| Note to Procurement        | <p>These specifications are superior to the quality generally available at “discount” retail outlets. Inferior construction and materials, lead to vastly reduced service life.</p>                                                                                                                                                                                                                                                                                                          |

| Catalogue Number | Item Name                          | Available on Transversal Contract | Contract Number or Code |
|------------------|------------------------------------|-----------------------------------|-------------------------|
| PHC-F-009        | <b><i>Filing cabinet: bulk</i></b> | No                                |                         |

|                            |                                                                                                                                                                                                                                                                                                                                                                                                                                                                                                                                                                                                                                                                                                                                                                                                                                                                                                                                                                                                                                                                                                                                                                                                                                                                       |
|----------------------------|-----------------------------------------------------------------------------------------------------------------------------------------------------------------------------------------------------------------------------------------------------------------------------------------------------------------------------------------------------------------------------------------------------------------------------------------------------------------------------------------------------------------------------------------------------------------------------------------------------------------------------------------------------------------------------------------------------------------------------------------------------------------------------------------------------------------------------------------------------------------------------------------------------------------------------------------------------------------------------------------------------------------------------------------------------------------------------------------------------------------------------------------------------------------------------------------------------------------------------------------------------------------------|
| Functional Specifications  | <p>All-metal epoxy-coated movable filing cabinets, on levelled steel tracks. Pale grey colour preferred. Can have contrasting darker accents.</p> <p>Each cabinet will be double-sided, except for the last cabinet (single-sided, stationary, usually against an end wall) and the first cabinet (single-sided, lockable)</p> <p>Each cabinet (or bay) to have a maximum of 6 adjustable shelves – floor level not for general use</p> <p>A fully loaded cabinet must be moved easily by hand pressure, otherwise must have a mechanism to multiply the force exerted by a user (e.g. lever or rotary gear)</p> <p>Cabinets must be stable, non-tipping when fully loaded</p> <p>Steel shelves, with rolled/formed front lip, no sharp edges</p> <p>Shelves to be slotted for steel vertical dividers</p> <p>First cabinet must lock securely when in the closed position</p> <p>Access space between cabinets to be a minimum of 1 metre</p> <p>Rubber bumpers on cabinets ensure quiet closing</p> <p>Steel dividers, vertical, adjustable (not wire “toast-rack” type)</p> <p>To have tabs which fit into slots on shelves, alternatively to grip rolled/formed front edge of shelf</p> <p>Floor panels between rails to have heavy-duty synthetic carpeting.</p> |
| Applicable Standards       | POPI Act 4 of 2013. SANS 757:2004.                                                                                                                                                                                                                                                                                                                                                                                                                                                                                                                                                                                                                                                                                                                                                                                                                                                                                                                                                                                                                                                                                                                                                                                                                                    |
| Performance Specifications | <p>Each fully-loaded cabinet must not flex or distort.</p> <p>Wheels to be securely seated in tracks, so that cabinets cannot derail.</p> <p>Cabinet movement must be free, but with sufficient inertia not to roll without intention.</p> <p>Epoxy coating according to SANS 778 paragraph 2, proof of compliance must be submitted.</p> <p>Expected service life: minimum 15 years.</p>                                                                                                                                                                                                                                                                                                                                                                                                                                                                                                                                                                                                                                                                                                                                                                                                                                                                             |
| Accessories                | <p>Vertical dividers: steel PHC-F-010.</p> <p>File-out cards PHC-C-005.</p>                                                                                                                                                                                                                                                                                                                                                                                                                                                                                                                                                                                                                                                                                                                                                                                                                                                                                                                                                                                                                                                                                                                                                                                           |
| Warranties                 | <p>5 years on cabinets, shelves, roller mechanisms, track, floor panels and locks.</p> <p>!0-year guarantee on spares availability.</p>                                                                                                                                                                                                                                                                                                                                                                                                                                                                                                                                                                                                                                                                                                                                                                                                                                                                                                                                                                                                                                                                                                                               |



|                           |                                                                                                                                                                                                                                                                                                                                                                                                                                                                                                                                                                     |
|---------------------------|---------------------------------------------------------------------------------------------------------------------------------------------------------------------------------------------------------------------------------------------------------------------------------------------------------------------------------------------------------------------------------------------------------------------------------------------------------------------------------------------------------------------------------------------------------------------|
| Instructions to Suppliers | <p>Supplier to visit site for measurement, define needs, supply sketch of proposed number of cabinets and layout.</p> <p>Specify the minimum floor loading strength required to carry fully-loaded cabinets.</p> <p>Advise on any additional lighting which may be required for efficient storage or retrieval.</p> <p>Deliver and assemble. Lay and level tracks. Commission system before handover. Train end-users in correct use of the system.</p> <p>Provide details and costing of after-sales support.</p> <p>Stipulate frequency of mandatory service.</p> |
| Note to Procurement       | <p>Ensure that the correct metal vertical dividers are in series with this item – they are not necessarily compatible with systems from a different vendor.</p> <p>Ensure that floor has been certified by Provincial engineering personnel to support floor loading, before finalising procurement.</p>                                                                                                                                                                                                                                                            |

| Catalogue Number | Item Name                                  | Available on Transversal Contract | Contract Number or Code |
|------------------|--------------------------------------------|-----------------------------------|-------------------------|
| PHC-F-012        | <b><i>Filing cabinet:<br/>4-drawer</i></b> | No                                |                         |

|                            |                                                                                                                                                                                                                                                                                        |
|----------------------------|----------------------------------------------------------------------------------------------------------------------------------------------------------------------------------------------------------------------------------------------------------------------------------------|
| Functional Specifications  | <p>Conventional 4-drawer all-steel filing cabinet.</p> <p>Cabinet manufactured from high quality sheet metal and finished with baked epoxy coating</p> <p>Colour pale beige with darker accents</p> <p>Lockable; single key locks all drawers, with an internal locking mechanism.</p> |
| Applicable Standards       | SANS 757:2004, POPI Act 4 of 2013.                                                                                                                                                                                                                                                     |
| Performance Specifications | <p>No plastic structural components, no flimsy tin components in drawer slides or locking mechanism.</p> <p>Must be cleanable and disinfectable with standard solutions.</p>                                                                                                           |
| Accessories                | Must be supplied with 2 keys.                                                                                                                                                                                                                                                          |
| Warranties                 | Unit to have a minimum 2-year guarantee on carcass. 5-year guarantee on locks, lock bars, drawer slides and handles.                                                                                                                                                                   |
| Instructions to Suppliers  | Supplier to indicate what spare parts are available, with pricing.                                                                                                                                                                                                                     |
| Note to Procurement        | Stationery cupboard PHC-F-18 to have same colours as this item.                                                                                                                                                                                                                        |

| Catalogue Number | Item Name                                           | Available on Transversal Contract | Contract Number or Code |
|------------------|-----------------------------------------------------|-----------------------------------|-------------------------|
| PHC-F-020        | <b><i>Floor polisher: electric, single disc</i></b> | No                                |                         |
|                  |                                                     |                                   |                         |

|                            |                                                                                                                                                                                      |
|----------------------------|--------------------------------------------------------------------------------------------------------------------------------------------------------------------------------------|
| Functional Specifications  | Commercial-duty single disc electric floor polishing machine.<br>Motor at least 1400W.<br>With self-feeding hopper for cleaning and stripping solutions.<br>Power cable at least 5m. |
| Applicable Standards       | SANS 60335-2-10, SANS 60335-2-67.                                                                                                                                                    |
| Performance Specifications | Must scrub and polish floors, and strip old sealer with the appropriate discs.<br>Cleanable with standard cleaning and disinfectant solutions.<br>Chemical resistant.                |
| Accessories                | Standard cleaning disc.                                                                                                                                                              |
| Warranties                 | 2 years.                                                                                                                                                                             |
| Instructions to Suppliers  | Supplier to deliver and train cleaning personnel in its use.<br>Supplier to state service/maintenance requirements, and to quote post-sales support with pricing.                    |
| Note to Procurement        | A general purpose cleaning disc PHC-E-012 and a stripping disc PHC-E-013 must be in series with this machine.                                                                        |

| Catalogue Number | Item Name                    | Available on Transversal Contract | Contract Number or Code |
|------------------|------------------------------|-----------------------------------|-------------------------|
| PHC-F-021        | <b><i>Microwave oven</i></b> | No                                |                         |
|                  |                              |                                   |                         |

|                            |                                                                                                                                 |
|----------------------------|---------------------------------------------------------------------------------------------------------------------------------|
| Functional Specifications  | Standard manual microwave oven.<br>Controls for power and cooking time.<br>25-30l, 900W.<br>Stainless steel interior preferred. |
| Applicable Standards       | SANS 60335-2-25, SANS 60335-2-90.                                                                                               |
| Performance Specifications | 5-year design life.                                                                                                             |
| Accessories                | Oven dish and carousel.                                                                                                         |
| Warranties                 | 2 years.                                                                                                                        |
| Instructions to Suppliers  | State available after-sales support.                                                                                            |
| Note to Procurement        | None.                                                                                                                           |

| Catalogue Number | Item Name            | Available on Transversal Contract | Contract Number or Code |
|------------------|----------------------|-----------------------------------|-------------------------|
| PHC-F-014        | <b><i>Mirror</i></b> | No                                |                         |

|                            |                                                                                                                                                                       |
|----------------------------|-----------------------------------------------------------------------------------------------------------------------------------------------------------------------|
| Functional Specifications  | Mirror, glass, 300x400 mmx3mm thick, in frame (natural anodised aluminium preferred), pre-drilled for wall mounting. Back to be sealed to keep out dust and moisture. |
| Applicable Standards       | None available.                                                                                                                                                       |
| Performance Specifications | Must be cleanable and disinfected with standard solutions.                                                                                                            |
| Accessories                | To be supplied with wall mounting hardware (stainless steel screws).                                                                                                  |
| Warranties                 | Minimum 1 year on frame.                                                                                                                                              |
| Instructions to Suppliers  | None.                                                                                                                                                                 |
| Note to Procurement        |                                                                                                                                                                       |

| Catalogue Number | Item Name                            | Available on Transversal Contract | Contract Number or Code |
|------------------|--------------------------------------|-----------------------------------|-------------------------|
| PHC-F-022        | <b><i>Refrigerator: bar type</i></b> | No                                |                         |

|                            |                                                                                                 |
|----------------------------|-------------------------------------------------------------------------------------------------|
| Functional Specifications  | Domestic small bar-type refrigerator, 60-90l capacity.<br>For laboratory specimens only.        |
| Applicable Standards       | Refrigerant: CFC free.<br>Certificate: ISO9001, ISO14001, ISO13485, DIN 58345, SANS 60335-2-24. |
| Performance Specifications | At least A+ grading on energy efficiency.                                                       |
| Accessories                |                                                                                                 |
| Warranties                 | 2 years.                                                                                        |
| Instructions to Suppliers  |                                                                                                 |
| Note to Procurement        |                                                                                                 |

| Catalogue Number | Item Name                        | Available on Transversal Contract | Contract Number or Code |
|------------------|----------------------------------|-----------------------------------|-------------------------|
| PHC-F-047        | <b>Refrigerator: double door</b> | No                                |                         |

|                            |                                                                                                                                                                                                                                                                                                                                                                                                                                                                                                                                                                                                                                                                                                                                                                                                                                                                                                                                                                                                                                                                                                                                                                                                                                                                                                                                                          |
|----------------------------|----------------------------------------------------------------------------------------------------------------------------------------------------------------------------------------------------------------------------------------------------------------------------------------------------------------------------------------------------------------------------------------------------------------------------------------------------------------------------------------------------------------------------------------------------------------------------------------------------------------------------------------------------------------------------------------------------------------------------------------------------------------------------------------------------------------------------------------------------------------------------------------------------------------------------------------------------------------------------------------------------------------------------------------------------------------------------------------------------------------------------------------------------------------------------------------------------------------------------------------------------------------------------------------------------------------------------------------------------------|
| Functional Specifications  | <p>Upright type, double- door, min. 600l.</p> <p>Operating temperature: +2°C to +8°C at ambient temperature +5°C to 35°C and +60% humidity. Optionally the supplier can propose more than one model for use in moderate and hot temperature zones.</p> <p>Automatic defrost.</p> <p>Thermostat control should be graduated in Degrees C, with 1 degree increments. Display accuracy: 0.1C.</p> <p>Ideally fridge and freezer compartments should have separate controls.</p> <p>Glass door not a prerequisite.</p> <p>Self-closing, lockable doors.</p> <p>Forced air circulation system with intelligent control.</p> <p>Audible and visual alarm for High or low temperature.</p> <p>Door ajar alarm, system failure alarm.</p> <p>4 casters mounted under the bottom (can be 2 fixed, 2 rotating).</p> <p>Interior LED or fluorescent lighting.</p> <p>5/6 units shelves made of quality plastic- or epoxy- coated steel wire.</p> <p>Exterior made from high quality structural plate, interior made from ABS material.</p> <p>Visual and audible warning device for high and low temperature alarm (Min/Max thermometer).</p> <p>Safety thermostat to avoid minus temperatures.</p> <p>Built-in elements must be resistant to mechanical damage.</p> <p>Good quality compressor (1 unit) and fan motor.</p> <p>Power supply: 220V/50Hz 1 phase.</p> |
| Applicable Standards       | <p>At least A+ grading on energy efficiency.</p> <p>Refrigerant: CFC free.</p> <p>Certificate: ISO9001, ISO14001, ISO13485, DIN 58345, SANS 60335-2-24.</p>                                                                                                                                                                                                                                                                                                                                                                                                                                                                                                                                                                                                                                                                                                                                                                                                                                                                                                                                                                                                                                                                                                                                                                                              |
| Performance Specifications | <p>Noise emission: &lt; 60 dB(A).</p> <p>Warning device for min. 12h in the event of power failure (power failure alarm).</p> <p>Temperature holdover period 4 hours or better, in case of power failure.</p> <p>Must be cleanable and disinfected with standard materials.</p>                                                                                                                                                                                                                                                                                                                                                                                                                                                                                                                                                                                                                                                                                                                                                                                                                                                                                                                                                                                                                                                                          |
| Accessories                | None.                                                                                                                                                                                                                                                                                                                                                                                                                                                                                                                                                                                                                                                                                                                                                                                                                                                                                                                                                                                                                                                                                                                                                                                                                                                                                                                                                    |
| Warranties                 | 2 years on compressor, 5 years on other components.                                                                                                                                                                                                                                                                                                                                                                                                                                                                                                                                                                                                                                                                                                                                                                                                                                                                                                                                                                                                                                                                                                                                                                                                                                                                                                      |
| Instructions to Suppliers  | <p>Includes delivery, installation, training.</p> <p>Supplier must specify available after-sales support, with relevant pricing.</p>                                                                                                                                                                                                                                                                                                                                                                                                                                                                                                                                                                                                                                                                                                                                                                                                                                                                                                                                                                                                                                                                                                                                                                                                                     |
| Note to Procurement        | None.                                                                                                                                                                                                                                                                                                                                                                                                                                                                                                                                                                                                                                                                                                                                                                                                                                                                                                                                                                                                                                                                                                                                                                                                                                                                                                                                                    |

| Catalogue Number | Item Name                        | Available on Transversal Contract | Contract Number or Code |
|------------------|----------------------------------|-----------------------------------|-------------------------|
| PHC-F-043        | <b>Refrigerator: single door</b> | No                                |                         |

|                            |                                                                                                                                                                                                                                                                                                                                                                                                                                                                                                                                                                                                                                                                                                                                                                                                                                                                                                                                                                                                                                                                                                                                                                                                                                                                                                                                                                 |
|----------------------------|-----------------------------------------------------------------------------------------------------------------------------------------------------------------------------------------------------------------------------------------------------------------------------------------------------------------------------------------------------------------------------------------------------------------------------------------------------------------------------------------------------------------------------------------------------------------------------------------------------------------------------------------------------------------------------------------------------------------------------------------------------------------------------------------------------------------------------------------------------------------------------------------------------------------------------------------------------------------------------------------------------------------------------------------------------------------------------------------------------------------------------------------------------------------------------------------------------------------------------------------------------------------------------------------------------------------------------------------------------------------|
| Functional Specifications  | <p>Upright type, single door, approximately 260l.</p> <p>Operating temperature: +2°C to +8°C at ambient temperature +5°C to 35°C and +60% humidity. Optionally the supplier can propose more than one model for use in moderate and hot temperature zones.</p> <p>Automatic defrost.</p> <p>Thermostat control should be graduated in degrees C, with 1 degree increments. Display accuracy: 0.1C.</p> <p>Ideally fridge and freezer compartments should have separate controls.</p> <p>Glass door not a prerequisite.</p> <p>Self-closing, lockable door.</p> <p>Forced air circulation system with intelligent control.</p> <p>Audible and visual alarm for high or low temperature.</p> <p>Door ajar alarm, system failure alarm.</p> <p>4 casters mounted under the bottom (can be 2 fixed, 2 rotating).</p> <p>Interior LED or fluorescent lighting.</p> <p>5/6 units shelves made of quality plastic- or epoxy- coated steel wire.</p> <p>Exterior made from high quality structural plate, interior made from ABS material.</p> <p>Visual and audible warning device for high and low temperature alarm (Min/Max thermometer).</p> <p>Safety thermostat to avoid minus temperatures.</p> <p>Built-in elements must be resistant to mechanical damage.</p> <p>Good quality compressor (1 unit) and fan motor.</p> <p>Power supply: 220V/50Hz 1 phase.</p> |
| Applicable Standards       | <p>At least A+ grading on energy efficiency.</p> <p>Refrigerant: CFC free.</p> <p>Certificate: ISO9001, ISO14001, ISO13485, DIN 58345, SANS 60335-2-24.</p>                                                                                                                                                                                                                                                                                                                                                                                                                                                                                                                                                                                                                                                                                                                                                                                                                                                                                                                                                                                                                                                                                                                                                                                                     |
| Performance Specifications | <p>Noise emission: &lt; 60 dB(A).</p> <p>Warning device for min. 12h in the event of power failure (power failure alarm).</p> <p>Temperature holdover period 4 hours or better, in case of power failure.</p> <p>Must be cleanable and disinfectable with standard materials.</p>                                                                                                                                                                                                                                                                                                                                                                                                                                                                                                                                                                                                                                                                                                                                                                                                                                                                                                                                                                                                                                                                               |
| Accessories                | None.                                                                                                                                                                                                                                                                                                                                                                                                                                                                                                                                                                                                                                                                                                                                                                                                                                                                                                                                                                                                                                                                                                                                                                                                                                                                                                                                                           |
| Warranties                 | 2 years on compressor, 5 years on other components.                                                                                                                                                                                                                                                                                                                                                                                                                                                                                                                                                                                                                                                                                                                                                                                                                                                                                                                                                                                                                                                                                                                                                                                                                                                                                                             |
| Instructions to Suppliers  | <p>Includes delivery, installation and training.</p> <p>Supplier must specify availability of after-sales support, with relevant pricing.</p>                                                                                                                                                                                                                                                                                                                                                                                                                                                                                                                                                                                                                                                                                                                                                                                                                                                                                                                                                                                                                                                                                                                                                                                                                   |
| Note to Procurement        | None.                                                                                                                                                                                                                                                                                                                                                                                                                                                                                                                                                                                                                                                                                                                                                                                                                                                                                                                                                                                                                                                                                                                                                                                                                                                                                                                                                           |



| Catalogue Number | Item Name                              | Available on Transversal Contract | Contract Number or Code |
|------------------|----------------------------------------|-----------------------------------|-------------------------|
| PHC-F-015        | <b>Seating: waiting area, 2-seater</b> | No                                |                         |

|                            |                                                                                                                                                                                                                                                                                                                                                                                                                                                                                                                                                                                                                                                                                                                                                                                                                                                                                                                                                                                                                                                                                                                                                                                                                                                                                                                                                                 |
|----------------------------|-----------------------------------------------------------------------------------------------------------------------------------------------------------------------------------------------------------------------------------------------------------------------------------------------------------------------------------------------------------------------------------------------------------------------------------------------------------------------------------------------------------------------------------------------------------------------------------------------------------------------------------------------------------------------------------------------------------------------------------------------------------------------------------------------------------------------------------------------------------------------------------------------------------------------------------------------------------------------------------------------------------------------------------------------------------------------------------------------------------------------------------------------------------------------------------------------------------------------------------------------------------------------------------------------------------------------------------------------------------------|
| Functional Specifications  | <p>All metal bench style seating for waiting areas – 2-seater.</p> <p><b>Arms</b> should only be present at either end of the unit; no intermediate arms.</p> <p><b>Legs and arms</b> to be chrome-plated (supplier to indicate the base metal or alloy and the thickness of chrome-plating).</p> <p><b>Legs</b> to have built-in non-removable levelling feet, of non-corroding, non-disintegrating material. Must withstand cleaning with dilute bleach or 10% glutaraldehyde solution. Specify method by which levellers are attached to legs.</p> <p><b>Horizontal frame</b> bar of mild steel, chromed or epoxy powder-coated (comply with Type 2 of SANS 1274). Supplier to indicate steel thickness. Supplier to indicate available colours of powder coating. Extruded bar acceptable provided no decrease in tensile strength.</p> <p><b>Seat and backrest:</b> stainless steel preferred. Supplier to provide option for cold rolled steel, powder-coated silver finish. Seat and backrest may be one or two-piece, depending on design. In either case, all edges must be rigidly supported by the frame of the individual seat, such that the edge of the rolled sheet metal is not loose (enclosed edge preferred).</p> <p><b>Seat frames</b> to be individually attached to the horizontal frame bar. Supplier to declare mode of attachment.</p> |
| Applicable Standards       | <p>Epoxy coating to comply with Type 2 of SANS 1274.</p> <p>Fittings, fasteners, clips, locks, rivets, washers, must comply with SANS 135 or equivalent.</p>                                                                                                                                                                                                                                                                                                                                                                                                                                                                                                                                                                                                                                                                                                                                                                                                                                                                                                                                                                                                                                                                                                                                                                                                    |
| Performance Specifications | <p>Each individual seat must be rated for a 200kg user. The unit as a whole must be rated for 400kg. Rating means that neither the individual seat nor the unit as a whole will deform, deflect or rack, at maximum load.</p> <p>Must be cleanable and disinfected with standard solutions.</p> <p>A minimum 10-year service life is desired.</p>                                                                                                                                                                                                                                                                                                                                                                                                                                                                                                                                                                                                                                                                                                                                                                                                                                                                                                                                                                                                               |
| Accessories                | None.                                                                                                                                                                                                                                                                                                                                                                                                                                                                                                                                                                                                                                                                                                                                                                                                                                                                                                                                                                                                                                                                                                                                                                                                                                                                                                                                                           |
| Warranties                 | Minimum 5 years on all components. Spares availability guaranteed for minimum of 5 years.                                                                                                                                                                                                                                                                                                                                                                                                                                                                                                                                                                                                                                                                                                                                                                                                                                                                                                                                                                                                                                                                                                                                                                                                                                                                       |
| Instructions to Suppliers  | Supplier to deliver and assemble, install and level.                                                                                                                                                                                                                                                                                                                                                                                                                                                                                                                                                                                                                                                                                                                                                                                                                                                                                                                                                                                                                                                                                                                                                                                                                                                                                                            |
| Note to Procurement        | These specifications are superior to the quality generally available at “discount” retail outlets. Inferior construction and materials, lead to vastly reduced service life. Cheap units are susceptible to rust, distortion, and premature failure.                                                                                                                                                                                                                                                                                                                                                                                                                                                                                                                                                                                                                                                                                                                                                                                                                                                                                                                                                                                                                                                                                                            |

| Catalogue Number | Item Name                              | Available on Transversal Contract | Contract Number or Code |
|------------------|----------------------------------------|-----------------------------------|-------------------------|
| PHC-F-016        | <b>Seating: waiting area, 3-seater</b> | No                                |                         |

|                            |                                                                                                                                                                                                                                                                                                                                                                                                                                                                                                                                                                                                                                                                                                                                                                                                                                                                                                                                                                                                                                                                                                                                                                                                                                                                                                                                                                 |
|----------------------------|-----------------------------------------------------------------------------------------------------------------------------------------------------------------------------------------------------------------------------------------------------------------------------------------------------------------------------------------------------------------------------------------------------------------------------------------------------------------------------------------------------------------------------------------------------------------------------------------------------------------------------------------------------------------------------------------------------------------------------------------------------------------------------------------------------------------------------------------------------------------------------------------------------------------------------------------------------------------------------------------------------------------------------------------------------------------------------------------------------------------------------------------------------------------------------------------------------------------------------------------------------------------------------------------------------------------------------------------------------------------|
| Functional Specifications  | <p>All metal bench style seating for waiting areas – 3-seater.</p> <p><b>Arms</b> should only be present at either end of the unit; no intermediate arms.</p> <p><b>Legs and arms</b> to be chrome-plated (Supplier to indicate the base metal or alloy and the thickness of chrome-plating).</p> <p><b>Legs</b> to have built-in non-removable levelling feet, of non-corroding, non-disintegrating material. Must withstand cleaning with dilute bleach or 10% glutaraldehyde solution. Specify method by which levellers are attached to legs.</p> <p><b>Horizontal frame</b> bar of mild steel, chromed or epoxy powder-coated (comply with Type 2 of SANS 1274). Supplier to indicate steel thickness. Supplier to indicate available colours of powder coating. Extruded bar acceptable provided no decrease in tensile strength.</p> <p><b>Seat and backrest:</b> stainless steel preferred. Supplier to provide option for cold rolled steel, powder-coated silver finish. Seat and backrest may be one or two-piece, depending on design. In either case, all edges must be rigidly supported by the frame of the individual seat, such that the edge of the rolled sheet metal is not loose (enclosed edge preferred).</p> <p><b>Seat frames</b> to be individually attached to the horizontal frame bar. Supplier to declare mode of attachment.</p> |
| Applicable Standards       | <p>Epoxy coating to comply with Type 2 of SANS 1274.</p> <p>Fittings, fasteners, clips, locks, rivets, washers, must comply with SANS 135 or equivalent.</p>                                                                                                                                                                                                                                                                                                                                                                                                                                                                                                                                                                                                                                                                                                                                                                                                                                                                                                                                                                                                                                                                                                                                                                                                    |
| Performance Specifications | <p>Each individual seat must be rated for a 200kg user. The unit as a whole must be rated for 600kg. Rating means that neither the individual seat nor the unit as a whole will deform, deflect or rack, at maximum load.</p> <p>Must be cleanable and disinfectable with standard solutions.</p> <p>A minimum 10-year service life is desired.</p>                                                                                                                                                                                                                                                                                                                                                                                                                                                                                                                                                                                                                                                                                                                                                                                                                                                                                                                                                                                                             |
| Accessories                | None.                                                                                                                                                                                                                                                                                                                                                                                                                                                                                                                                                                                                                                                                                                                                                                                                                                                                                                                                                                                                                                                                                                                                                                                                                                                                                                                                                           |
| Warranties                 | Minimum 5 years on all components. Spares availability guaranteed for minimum of 5 years.                                                                                                                                                                                                                                                                                                                                                                                                                                                                                                                                                                                                                                                                                                                                                                                                                                                                                                                                                                                                                                                                                                                                                                                                                                                                       |
| Instructions to Suppliers  | Supplier to deliver and assemble, install and level.                                                                                                                                                                                                                                                                                                                                                                                                                                                                                                                                                                                                                                                                                                                                                                                                                                                                                                                                                                                                                                                                                                                                                                                                                                                                                                            |
| Note to Procurement        | These specifications are superior to the quality generally available at “discount” retail outlets. Inferior construction and materials, lead to vastly reduced service life. Cheap units are susceptible to rust, distortion, and premature failure.                                                                                                                                                                                                                                                                                                                                                                                                                                                                                                                                                                                                                                                                                                                                                                                                                                                                                                                                                                                                                                                                                                            |

| Catalogue Number | Item Name                              | Available on Transversal Contract | Contract Number or Code |
|------------------|----------------------------------------|-----------------------------------|-------------------------|
| PHC-F-017        | <b>Seating: waiting area, 4-seater</b> | No                                |                         |

|                            |                                                                                                                                                                                                                                                                                                                                                                                                                                                                                                                                                                                                                                                                                                                                                                                                                                                                                                                                                                                                                                                                                                                                                                                                                                                                                                                                                                  |
|----------------------------|------------------------------------------------------------------------------------------------------------------------------------------------------------------------------------------------------------------------------------------------------------------------------------------------------------------------------------------------------------------------------------------------------------------------------------------------------------------------------------------------------------------------------------------------------------------------------------------------------------------------------------------------------------------------------------------------------------------------------------------------------------------------------------------------------------------------------------------------------------------------------------------------------------------------------------------------------------------------------------------------------------------------------------------------------------------------------------------------------------------------------------------------------------------------------------------------------------------------------------------------------------------------------------------------------------------------------------------------------------------|
| Functional Specifications  | <p>All metal bench style seating for waiting areas – 4-seater.</p> <p><b>Arms</b> should only be present at either end of the unit; no intermediate arms.</p> <p><b>Legs and arms:</b> to be chrome-plated (Supplier to indicate the base metal or alloy and the thickness of chrome-plating).</p> <p><b>Legs</b> to have built-in non-removable levelling feet, of non-corroding, non-disintegrating material. Must withstand cleaning with dilute bleach or 10% glutaraldehyde solution. Specify method by which levellers are attached to legs.</p> <p><b>Horizontal frame</b> bar of mild steel, chromed or epoxy powder-coated (comply with Type 2 of SANS 1274). Supplier to indicate steel thickness. Supplier to indicate available colours of powder coating. Extruded bar acceptable provided no decrease in tensile strength.</p> <p><b>Seat and backrest:</b> stainless steel preferred. Supplier to provide option for cold rolled steel, powder-coated silver finish. Seat and backrest may be one or two-piece, depending on design. In either case, all edges must be rigidly supported by the frame of the individual seat, such that the edge of the rolled sheet metal is not loose (enclosed edge preferred).</p> <p><b>Seat frames</b> to be individually attached to the horizontal frame bar. Supplier to declare mode of attachment.</p> |
| Applicable Standards       | <p>Epoxy coating to comply with Type 2 of SANS 1274.</p> <p>Fittings, fasteners, clips, locks, rivets, washers, must comply with SANS 135 or equivalent.</p>                                                                                                                                                                                                                                                                                                                                                                                                                                                                                                                                                                                                                                                                                                                                                                                                                                                                                                                                                                                                                                                                                                                                                                                                     |
| Performance Specifications | <p>Each individual seat must be rated for a 200kg user. The unit as a whole, must be rated for 800kg. Rating means that neither the individual seat nor the unit as a whole, will deform, deflect or rack, at maximum load.</p> <p>Must be cleanable and disinfectable with standard solutions.</p> <p>A minimum 10-year service life is desired.</p>                                                                                                                                                                                                                                                                                                                                                                                                                                                                                                                                                                                                                                                                                                                                                                                                                                                                                                                                                                                                            |
| Accessories                | None.                                                                                                                                                                                                                                                                                                                                                                                                                                                                                                                                                                                                                                                                                                                                                                                                                                                                                                                                                                                                                                                                                                                                                                                                                                                                                                                                                            |
| Warranties                 | Minimum 5 years on all components. Spares availability guaranteed for minimum of 5 years.                                                                                                                                                                                                                                                                                                                                                                                                                                                                                                                                                                                                                                                                                                                                                                                                                                                                                                                                                                                                                                                                                                                                                                                                                                                                        |
| Instructions to Suppliers  | Supplier to deliver and assemble, install and level.                                                                                                                                                                                                                                                                                                                                                                                                                                                                                                                                                                                                                                                                                                                                                                                                                                                                                                                                                                                                                                                                                                                                                                                                                                                                                                             |
| Note to Procurement        | These specifications are superior to the quality generally available at “discount” retail outlets. Inferior construction and materials, lead to vastly reduced service life. Cheap units are susceptible to rust, distortion, and premature failure.                                                                                                                                                                                                                                                                                                                                                                                                                                                                                                                                                                                                                                                                                                                                                                                                                                                                                                                                                                                                                                                                                                             |

| Catalogue Number | Item Name                        | Available on Transversal Contract | Contract Number or Code |
|------------------|----------------------------------|-----------------------------------|-------------------------|
| PHC-F-018        | <b><i>Stationery cabinet</i></b> | No                                |                         |

|                            |                                                                                                                                                                                                                                                                                        |
|----------------------------|----------------------------------------------------------------------------------------------------------------------------------------------------------------------------------------------------------------------------------------------------------------------------------------|
| Functional Specifications  | <p>Cabinet manufactured from high quality sheet metal and finished with baked epoxy coating.</p> <p>Unit to have 6 adjustable steel shelves.</p> <p>The unit to be supplied with lockable doors with a handle on one or both doors.</p> <p>Colour: pale beige with darker accents.</p> |
| Applicable Standards       | SANS 757:2004.                                                                                                                                                                                                                                                                         |
| Performance Specifications | <p><b>Dimensions:</b> Approximately (H) 1800mm x (W) 900mm x (D) 450mm.</p> <p>No plastic hinges, no flimsy tin components in hinges or locking mechanism.</p> <p>Must be cleanable and disinfectable with standard solutions.</p>                                                     |
| Accessories                | The unit to be supplied with a key and a spare key.                                                                                                                                                                                                                                    |
| Warranties                 | Unit to have a minimum 2-year guarantee on carcass. 5-year guarantee on locks, lock bars, hinges and handles.                                                                                                                                                                          |
| Instructions to Suppliers  | Supplier to indicate what spare parts are available, with pricing.                                                                                                                                                                                                                     |
| Note to Procurement        | 4-drawer filing cabinet PHC-F-012 to have matching colours to this item.                                                                                                                                                                                                               |

| Catalogue Number | Item Name                           | Available on Transversal Contract | Contract Number or Code |
|------------------|-------------------------------------|-----------------------------------|-------------------------|
| PHC-F-011        | <b><i>Sterile stock cabinet</i></b> | No                                |                         |

|                            |                                                                                                                                                                                                                                                                                                                                                                               |
|----------------------------|-------------------------------------------------------------------------------------------------------------------------------------------------------------------------------------------------------------------------------------------------------------------------------------------------------------------------------------------------------------------------------|
| Functional Specifications  | <p>Cabinet manufactured from high quality sheet metal and finished with baked epoxy coating.</p> <p>Colour: white.</p> <p>Unit to have 6 adjustable steel shelves.</p> <p>The unit to be supplied with lockable doors with a handle on one or both doors.</p> <p>Doors to have glazed panels with fitted 3mm glass panes.</p> <p>Interior to have anti-microbial coating.</p> |
| Applicable Standards       | SANS 757:2004.                                                                                                                                                                                                                                                                                                                                                                |
| Performance Specifications | <p><b>Dimensions:</b> Approximately (H) 1 800mm x (W) 900mm x (D) 450mm.</p> <p>No plastic hinges, no flimsy tin components in hinges or locking mechanism.</p> <p>Must be cleanable and disinfectable with standard solutions.</p>                                                                                                                                           |
| Accessories                | The unit to be supplied with a key and a spare key.                                                                                                                                                                                                                                                                                                                           |
| Warranties                 | Unit to have a minimum 2-year guarantee on carcass. 5-year guarantee on locks, lock bars, hinges and handles.                                                                                                                                                                                                                                                                 |
| Instructions to Suppliers  | <p>Supplier to indicate what spare parts are available, with pricing.</p> <p>Supplier to provide cleaning instructions to preserve antimicrobial coating.</p>                                                                                                                                                                                                                 |
| Note to Procurement        | 4-drawer filing cabinet PHC-F-012 to have matching colours to this item.                                                                                                                                                                                                                                                                                                      |

| Catalogue Number | Item Name                                               | Available on Transversal Contract | Contract Number or Code |
|------------------|---------------------------------------------------------|-----------------------------------|-------------------------|
| PHC-F-067        | <b><i>Storage rack: exercise ball, wall-mounted</i></b> | No                                |                         |

|                            |                                                                                                                                                                                                                                                                                                                                                                                                                                                                                                                                                                                                |
|----------------------------|------------------------------------------------------------------------------------------------------------------------------------------------------------------------------------------------------------------------------------------------------------------------------------------------------------------------------------------------------------------------------------------------------------------------------------------------------------------------------------------------------------------------------------------------------------------------------------------------|
| Functional Specifications  | <p>Epoxy-coated wall-mounted mild steel frame, with spacing between bars to accommodate at least 4 balls, between 45cm and 85cm diameter. Side pieces to prevent ball from rolling off. Diagonal stays to wall, to prevent downward deflection if excessive weight is applied.</p> <p>An alternative design could consist of a series of wall-mounted metal rings, with diameters 10cm smaller than each ball size, mounted sufficiently distant from the backing wall to accommodate the matching ball. Rings could be arranged vertically, if space does not permit horizontal mounting.</p> |
| Applicable Standards       | SANS 778 paragraph 5.2.                                                                                                                                                                                                                                                                                                                                                                                                                                                                                                                                                                        |
| Performance Specifications | <p>Ball sizes 45cm, 55cm, 65cm, 75cm, 85cm.</p> <p>Expected service life at least 10 years.</p>                                                                                                                                                                                                                                                                                                                                                                                                                                                                                                |
| Accessories                | All wall-mounting hardware.                                                                                                                                                                                                                                                                                                                                                                                                                                                                                                                                                                    |
| Warranties                 | 2 years.                                                                                                                                                                                                                                                                                                                                                                                                                                                                                                                                                                                       |
| Instructions to Suppliers  | Must be mounted on the wall at a height to allow easy access by all staff, but maximise wall and floor space below the frame.                                                                                                                                                                                                                                                                                                                                                                                                                                                                  |
| Note to Procurement        |                                                                                                                                                                                                                                                                                                                                                                                                                                                                                                                                                                                                |

| Catalogue Number | Item Name                    | Available on Transversal Contract | Contract Number or Code |
|------------------|------------------------------|-----------------------------------|-------------------------|
| PHC-F-068        | <b><i>Table: folding</i></b> | No                                |                         |

|                            |                                                                                                                                                                                                                                                                                                                                                                                                        |
|----------------------------|--------------------------------------------------------------------------------------------------------------------------------------------------------------------------------------------------------------------------------------------------------------------------------------------------------------------------------------------------------------------------------------------------------|
| Functional Specifications  | <p>Portable folding table, for outreach teams. Minimum size 120 cm X 75cm (larger preferred), height 70-75cm.</p> <p>Impact- and scratch-resistant polyethylene top. Dark colour preferred.</p> <p>Aluminium frame preferred. Legs fold under top and stay in folded position.</p> <p>Top may be single piece or preferably two hinged pieces, for ease of transportation.</p> <p>Carrying handle.</p> |
| Applicable Standards       |                                                                                                                                                                                                                                                                                                                                                                                                        |
| Performance Specifications | <p>Must support at least 100kg total load on top, without appreciable deflection.</p> <p>Expected service life at least 5 years.</p>                                                                                                                                                                                                                                                                   |
| Accessories                | None.                                                                                                                                                                                                                                                                                                                                                                                                  |
| Warranties                 | 1 year.                                                                                                                                                                                                                                                                                                                                                                                                |
| Instructions to Suppliers  |                                                                                                                                                                                                                                                                                                                                                                                                        |
| Note to Procurement        |                                                                                                                                                                                                                                                                                                                                                                                                        |

| Catalogue Number | Item Name                 | Available on Transversal Contract | Contract Number or Code |
|------------------|---------------------------|-----------------------------------|-------------------------|
| PHC-F-019        | <b>Table: trapezoidal</b> | No                                |                         |

|                           |                                                                                                                                                                                                                                                                                                                                                                                                                                                                                                                                                                                                                                                                                                                                                                                                                                                                                                                                                                                                                                                                                                                                                                                                                                                                                                                                                                                                                                                                                                                                                                                                                                                                                                                                                                                                                                                                                                                                                                       |
|---------------------------|-----------------------------------------------------------------------------------------------------------------------------------------------------------------------------------------------------------------------------------------------------------------------------------------------------------------------------------------------------------------------------------------------------------------------------------------------------------------------------------------------------------------------------------------------------------------------------------------------------------------------------------------------------------------------------------------------------------------------------------------------------------------------------------------------------------------------------------------------------------------------------------------------------------------------------------------------------------------------------------------------------------------------------------------------------------------------------------------------------------------------------------------------------------------------------------------------------------------------------------------------------------------------------------------------------------------------------------------------------------------------------------------------------------------------------------------------------------------------------------------------------------------------------------------------------------------------------------------------------------------------------------------------------------------------------------------------------------------------------------------------------------------------------------------------------------------------------------------------------------------------------------------------------------------------------------------------------------------------|
| Functional Specifications | <p>Trapezoidal table.</p> <p><b>Frame:</b> table to have a self-supporting metal frame; tops must not form part of structural integrity. Frame of mild steel, epoxy powder-coated (comply with Type 2 of SANS 1274). Supplier to specify steel thickness. Preference is for open frame with individual legs at ground level, for easy floor cleaning. Legs to have suitable durable plugs and/or ferrules, with adequate capacity for levelling. Plug/Ferrule material must withstand normal cleaning materials used on flooring, as well as diluted bleach and 10% glutaraldehyde solution. Ferrules and levellers must be non-staining, non-corroding, non-rusting.</p> <p><b>Worktops:</b></p> <p><b>Material :</b> Tops are to be constructed of either moisture resistant particleboard (must comply with SABS EN 312-5: 2003, proof to be supplied) or medium density fibreboard (must comply with SABS 540-1: 1991, proof to be supplied). 11-18mm thickness</p> <p><b>Work surface</b> to be continuous decorative laminate, at least 0.8mm thick, complying with general purpose laminates, SANS 4586-2, bonded to the substrate. A high- pressure laminate may be proposed</p> <p><b>Pale grey colour</b> preferred, supplier to provide samples. Abrasion test results as per CKS 36:2004 or equivalent, to be supplied. The worktops are to be counter-laminated on the inferior surface</p> <p><b>Edging:</b> Polyurethane or high-impact thermoplastic. No self-adhesive laminate edging. At least 4mm thick. Rectangular cross-section preferred, to minimise gap when the two tops are placed in contiguity. Edging must be securely adhered to the substrate, without visible glue line, gaps or protruding edges. Edging (and the adhesive joint) must be impact, water, and heat resistant, at upper and lower joints with laminate. Colour of edging may be different to colour of top laminate – supplier to provide colour range available.</p> |
| Applicable Standards      | <p>Compliance with SANS 660:2012 is required, with particular reference to strength and impact requirements.</p> <p>Epoxy coating to comply with Type 2 of SANS 1274.</p> <p>SABS EN 312-5: 2003.</p> <p>SABS 540-1: 1991.</p> <p>General Purpose laminates, SANS 4586-2.</p> <p>CKS 36:2004 or equivalent.</p> <p>Fittings, fasteners, clips, locks, rivets, washers, must comply with SANS 135 or equivalent.</p>                                                                                                                                                                                                                                                                                                                                                                                                                                                                                                                                                                                                                                                                                                                                                                                                                                                                                                                                                                                                                                                                                                                                                                                                                                                                                                                                                                                                                                                                                                                                                   |



|                            |                                                                                                                                                                                                                          |
|----------------------------|--------------------------------------------------------------------------------------------------------------------------------------------------------------------------------------------------------------------------|
| Performance Specifications | <p><b>Worktops:</b> Dimensions: 1 200x600 trapezoidal top. Overall height (on frame): 720-750mm.</p> <p>Must be cleanable and disinfected with standard solutions.</p> <p>A minimum 10-year service life is desired.</p> |
| Accessories                | None.                                                                                                                                                                                                                    |
| Warranties                 | Minimum 5 years on all components. Spares availability guaranteed for minimum of 5 years.                                                                                                                                |
| Instructions to Suppliers  | Supplier to deliver and assemble, if KDU.                                                                                                                                                                                |
| Note to Procurement        | These specifications are superior to the quality generally available at “discount” retail outlets. Inferior construction and materials, lead to vastly reduced service life.                                             |

| Catalogue Number | Item Name                  | Available on Transversal Contract | Contract Number or Code |
|------------------|----------------------------|-----------------------------------|-------------------------|
| PHC-F-045        | <i><b>Tumble dryer</b></i> | No                                |                         |

|                            |                                                                                                                                                                                                                                                                                                                                                       |
|----------------------------|-------------------------------------------------------------------------------------------------------------------------------------------------------------------------------------------------------------------------------------------------------------------------------------------------------------------------------------------------------|
| Functional Specifications  | <p>Large capacity electric tumble drier.</p> <p>Front-loading.</p> <p>Vented type – must be mounted against outside wall, with hole through the wall for moisture exhaust hose.</p> <p>Can be mounted on the wall at eye-level to minimise floor space usage.</p> <p>Auto-shutoff at end of drying cycle.</p> <p>Single-phase electricity supply.</p> |
| Applicable Standards       | <p>At least A grading on energy efficiency.</p> <p>SANS 60335-2-11.</p>                                                                                                                                                                                                                                                                               |
| Performance Specifications | <p>Must be suitable for humid coastal climate.</p> <p>Minimum 10kg load.</p> <p>Cleanable with standard cleaning and disinfectant solutions.</p> <p>Chemical resistant.</p> <p>Expected service life: 10 years.</p>                                                                                                                                   |
| Accessories                | <p>All wall-mounting hardware (stainless steel screws), venting hose, spare lint filter (if replaceable).</p>                                                                                                                                                                                                                                         |
| Warranties                 | <p>3 years.</p>                                                                                                                                                                                                                                                                                                                                       |
| Instructions to Suppliers  | <p>Supplier to deliver and install in co-operation with departmental technical personnel.</p>                                                                                                                                                                                                                                                         |
| Note to Procurement        |                                                                                                                                                                                                                                                                                                                                                       |

| Catalogue Number | Item Name                    | Available on Transversal Contract | Contract Number or Code |
|------------------|------------------------------|-----------------------------------|-------------------------|
| PHC-F-046        | <b><i>Vacuum cleaner</i></b> | No                                |                         |

|                            |                                                                                                                                                         |
|----------------------------|---------------------------------------------------------------------------------------------------------------------------------------------------------|
| Functional Specifications  | <p>Large domestic canister–type machine.</p> <p>At least 1800 W motor, 2000W preferred.</p> <p>Bagless type preferred.</p> <p>Washable HEPA filters</p> |
| Applicable Standards       | <p>At least A grading on energy efficiency.</p> <p>SANS 60335-2-2.</p>                                                                                  |
| Performance Specifications | <p>Chemical resistant.</p> <p>Expected service life: 5 years.</p>                                                                                       |
| Accessories                | <p>Complete with flexible hose, extension tubes, brushes and attachments, spare filters, instruction manual.</p>                                        |
| Warranties                 | <p>2 years.</p>                                                                                                                                         |
| Instructions to Suppliers  |                                                                                                                                                         |
| Note to Procurement        | <p>Spare HEPA filters to be procured in series with this machine.</p>                                                                                   |

| Catalogue Number | Item Name                                       | Available on Transversal Contract | Contract Number or Code |
|------------------|-------------------------------------------------|-----------------------------------|-------------------------|
| PHC-F-058        | <b><i>Washing machine:<br/>front loader</i></b> | No                                |                         |

|                            |                                                                                                                                                                                                                                    |
|----------------------------|------------------------------------------------------------------------------------------------------------------------------------------------------------------------------------------------------------------------------------|
| Functional Specifications  | <p>Front-loading automatic washing machine.</p> <p>Direct drive.</p> <p>Pre-set washing, rinsing and spinning cycles.</p> <p>Auto-shutoff when cycle complete.</p> <p>Cold water connection only.</p> <p>Stainless steel drum.</p> |
| Applicable Standards       | <p>Minimum A++ electrical efficiency rating.</p>                                                                                                                                                                                   |
| Performance Specifications | <p>Minimum 8kg dry load.</p> <p>Cleanable with standard cleaning and disinfectant solutions.</p> <p>Chemical resistant.</p>                                                                                                        |
| Accessories                |                                                                                                                                                                                                                                    |
| Warranties                 | <p>3 years.</p>                                                                                                                                                                                                                    |
| Instructions to Suppliers  |                                                                                                                                                                                                                                    |
| Note to Procurement        |                                                                                                                                                                                                                                    |

| Catalogue Number | Item Name                                 | Available on Transversal Contract | Contract Number or Code |
|------------------|-------------------------------------------|-----------------------------------|-------------------------|
| PHC-F-048        | <b><i>Washing machine: top loader</i></b> | No                                |                         |

|                            |                                                                                                                                                                                                                                                         |
|----------------------------|---------------------------------------------------------------------------------------------------------------------------------------------------------------------------------------------------------------------------------------------------------|
| Functional Specifications  | <p>Large capacity electric washing machine.</p> <p>Top-loader.</p> <p>Automatic, with pre-set washing, rinsing and spinning cycles.</p> <p>Auto-shutoff when cycle complete.</p> <p>Cold water supply only.</p> <p>Single-phase electricity supply.</p> |
| Applicable Standards       | <p>At least A grading on energy efficiency.</p> <p>SANS 60335-2-7.</p>                                                                                                                                                                                  |
| Performance Specifications | <p>Minimum 15kg load.</p> <p>Cleanable with standard cleaning and disinfectant solutions.</p> <p>Chemical resistant.</p> <p>Expected service life: 10 years.</p>                                                                                        |
| Accessories                |                                                                                                                                                                                                                                                         |
| Warranties                 | 3 years.                                                                                                                                                                                                                                                |
| Instructions to Suppliers  | Supplier to deliver and install in co-operation with departmental technical personnel.                                                                                                                                                                  |
| Note to Procurement        |                                                                                                                                                                                                                                                         |



## **appendix 2**

List of Ideal Clinic and Ideal  
Community Health Centre elements  
pertaining to equipment, instruments,  
consumables and furniture

# Ideal Clinic Checklists

## CHECKLIST FOR ELEMENT: STAFF WEAR APPROPRIATE PERSONAL PROTECTIVE CLOTHING

Use the checklist below to check whether protective clothing is available and worn

| Item                                                        |                     |
|-------------------------------------------------------------|---------------------|
| Gloves – non sterile                                        | PHC-C-141, 142, 143 |
| Gloves – sterile                                            | PHC-C-138, 139, 140 |
| Disposable gowns OR aprons                                  | PHC-C-076, 137      |
| Protective face shields OR goggles with surgical face masks | PHC-C-080, 079, 077 |



## CHECKLIST FOR ELEMENT: BASIC MEDICAL SUPPLIES (CONSUMABLES) ARE AVAILABLE

Use the checklist below to check availability of medical and dressing supplies

| SURGICAL SUPPLIES                                                                   |                   |
|-------------------------------------------------------------------------------------|-------------------|
| Item                                                                                |                   |
| Intravenous administration set 20 drops/ml                                          | PHC-C-095         |
| Intravenous administration set paed 60 drops/ml                                     | PHC-C-096         |
| Blade stitch cutter sterile/pack                                                    | PHC-C-145         |
| Blood collecting vacutainer (holding barrel/bulldog)                                |                   |
| Blood lancets (haemolance)                                                          | PHC-C-146         |
| Urinary (Foley's) catheter silicone/latex 14f                                       | PHC-C-127         |
| Urinary (Foley's) catheter silicone/latex 18f                                       | PHC-C-128         |
| Urine drainage bag                                                                  | PHC-C-129         |
| Simple face mask OR reservoir mask OR nasal cannula (prongs) for oxygen, adults     | PHC-C-108,106,111 |
| Simple face mask OR reservoir mask OR nasal cannula (prongs) for oxygen, paediatric | PHC-C-110,105,107 |
| Face mask for nebuliser OR face mask with nebuliser chamber for adult               | PHC-C-107         |
| Face mask for nebuliser OR face mask with nebuliser chamber for paediatric          | PHC-C-108         |
| Nasogastric feeding tube 600mm fg8                                                  | PHC-C-342         |
| Nasogastric feeding tube 1000mm fg10 OR 12                                          | PHC-C-130         |
| Disposable aprons                                                                   | PHC-C-137         |
| Eye patches (disposable)                                                            | PHC-C-165         |
| Disposable razors                                                                   | PHC-C-166         |
| Gloves exam n/sterile large /box                                                    | PHC-C-143         |
| Gloves exam n/sterile medium /box                                                   | PHC-C-142         |
| Gloves exam n/sterile small /box                                                    | PHC-C-141         |
| Gloves surg sterile latex sz 6 OR 6.5 OR small/box                                  | PHC-C-138         |
| Gloves surg sterile latex sz 7 OR 7.5 OR medium/box                                 | PHC-C-139         |

|                                                                                   |                |
|-----------------------------------------------------------------------------------|----------------|
| Gloves surg sterile latex sz 8 OR large/box                                       | PHC-C-140      |
| Intravenous cannula (Jelco) 18g green/box                                         | PHC-C-097      |
| Intravenous cannula (Jelco) 20g pink/box                                          | PHC-C-098      |
| Intravenous cannula (Jelco) 22g blue/box                                          | PHC-C-099      |
| Intravenous cannula (Jelco) 24g yellow/box                                        | PHC-C-100      |
| Needles: 18 (pink) OR 20 (yellow)/box                                             | PHC-C-122,123  |
| Needles: 21 (green)/box                                                           | PHC-C-124      |
| Needles: 23 (blue)/box OR 22 (black)/box                                          | PHC-C-125      |
| * Syringes 3-part 2ml/box                                                         | PHC-C-118      |
| * Syringes 3-part 5ml/box                                                         | PHC-C-119      |
| * Syringes 3-part 10 or 20ml/box                                                  | PHC-C-120, 349 |
| Insulin syringe with needle/box                                                   | PHC-C-121      |
| Suture chromic g0/0 or g1/0 1/2 75cm                                              | PHC-C-181      |
| Suture nylon g2/0 or g3/0 3/8 45cm                                                | PHC-C-182      |
| Suture nylon g4/0 3/8 45cm                                                        | PHC-C-098      |
| <b>Only applicable if the facility uses older HB model</b>                        |                |
| Haemolysis applicator sticks                                                      | PHC-C-167      |
| HB meter clip                                                                     | PHC-C-168      |
| HB chamber glass-grooved                                                          | PHC-C-169      |
| HB cover glass-plain                                                              | PHC-C-170      |
| <b>Only applicable if facility uses an Automatic External Defibrillator (AED)</b> |                |
| Replacement pads for AED - adult                                                  | PHC-C-174      |
| Replacement pads for AED – paediatric                                             | PHC-C-175      |
| <b>Only applicable if facilities have a permanent doctor</b>                      |                |
| Disposable Amnihook                                                               | PHC-C-171      |
| Ultrasound gel medium viscosity                                                   | PHC-C-173      |
| Dental syringe and needle for LA                                                  | PHC-C-180      |

| DRESSINGS SUPPLIES                                                                                                  |           |                |
|---------------------------------------------------------------------------------------------------------------------|-----------|----------------|
| Item                                                                                                                | Pack size |                |
| Plaster roll                                                                                                        | 1         | PHC-C-153      |
| Bandage crepe                                                                                                       | 1         | PHC-C-147      |
| Gauze paraffin 100x100 /box                                                                                         | 1         | PHC-C-152      |
| Gauze swabs plain n/s 100x100x8ply/pack                                                                             | 100       | PHC-C-151      |
| Basic disposable dressing pack (should contain a minimum of: cotton-wool balls, swabs, 2 forceps, disposable drape) | 1         | PHC-C-150      |
| Cotton wool balls 1g 500`s                                                                                          | 1         | PHC-C-149      |
| Sanitary towels maternity /pack                                                                                     | 12        | PHC-C-156      |
| Stockinette 100mm OR150mm/roll                                                                                      | 1         | PHC-C-154, 186 |
| Adhesive micro-porous surgical tape 24/25mm or 48/50mm                                                              | 1         | PHC-C-159, 185 |
| 70% isopropyl alcohol prep pads 24x30 1ply OR 2 ply /box                                                            | 200       | PHC-C-155      |
| Gauze abs grade 1 burn /pack                                                                                        |           | PHC-C-150      |

\* Syringe three part consists of the barrel, the plunger and the rubber piston

## CHECKLIST FOR ELEMENT: REQUIRED FUNCTIONAL DIAGNOSTIC EQUIPMENT AND CONCURRENT CONSUMABLES FOR POINT OF CARE TESTING ARE AVAILABLE

Use the checklist below to check the availability of laboratory equipment and consumables in the various areas where they are used

| Item                                                                      |                |
|---------------------------------------------------------------------------|----------------|
| Laboratory equipment and consumables                                      |                |
| Hb meter                                                                  | PHC-E-152      |
| Blood glucometer                                                          | PHC-E-149      |
| Spare batteries for blood glucometer                                      |                |
| Glass slides for cervical smears                                          |                |
| Lancets                                                                   | PHC-C-146      |
| Blood glucose strips                                                      | PHC-C-181      |
| Urine dipsticks                                                           | PHC-C-205      |
| Urine specimen jar OR flask                                               | PHC-E-151, 158 |
| Malaria rapid test (where applicable in facilities in KZN, GP, MP and LP) | PHC-C-200      |
| Rapid HIV test                                                            | PHC-C-199      |
| Rh 'D' (Rhesus factor) test                                               | PHC-C-204      |

## CHECKLIST FOR ELEMENT: DISINFECTANT, CLEANING MATERIALS AND EQUIPMENT ARE AVAILABLE

Use the checklist below to check whether the disinfectant, cleaning materials and equipment are available

| Disinfectant and cleaning Material                                                                              |                      |
|-----------------------------------------------------------------------------------------------------------------|----------------------|
| High-level disinfection for medical equipment (e.g. sodium perborate powder OR phthalaldehyde)                  | PHC-C-063, 034, 035  |
| Chlorine compounds (e.g. Biocide D or Clorox)                                                                   | PHC-C-062            |
| Sanitary all-purpose cleaner                                                                                    | PHC-C-136            |
| Detergent-based solutions                                                                                       | PHC-C-065            |
| Wet polymer (floor polish)                                                                                      | PHC-C-066            |
| Protective polymer (strippers)                                                                                  | PHC-C-067            |
| All cleaning materials clearly labelled                                                                         |                      |
| Materials Safety Data Sheets for all cleaning products                                                          |                      |
| Cleaning equipment                                                                                              |                      |
| Two-way bucket system for mopping floors (bucket for clean water and bucket for dirty water) OR Janitor trolley | PHC-E-030            |
| Colour labelled mop – Red for toilets and bathrooms                                                             | PHC-E-015            |
| Colour labelled mop – Blue for clinical areas and non-clinical service areas                                    | PHC-E-016            |
| Mop labelled for cleaning exterior areas                                                                        | PHC-E-017            |
| Green bucket and cloths for bathroom and consulting room basins                                                 | PHC-E-009, PHC-C-187 |
| Red bucket and cloths for toilet                                                                                | PHC-E-007            |
| White cloths for kitchen                                                                                        | PHC-C-189            |
| Blue bucket and cloths for clinical areas and non-clinical service areas                                        | PHC-E-008, PHC-C-188 |
| Spray bottle for disinfectant solution                                                                          | PHC-E-022            |
| Window cleaning squeegee                                                                                        | PHC-E-150            |
| Mop sweeper or soft-platform broom                                                                              | PHC-E-018            |
| Floor polisher                                                                                                  | PHC-F-020            |

**CHECKLIST FOR ELEMENT: FUNCTIONAL FIREFIGHTING EQUIPMENT IS AVAILABLE**

Use the checklist below to check whether firefighting equipment is available

| Item                                                                                                                                         |           |
|----------------------------------------------------------------------------------------------------------------------------------------------|-----------|
| Fire extinguishers                                                                                                                           | PHC-E-043 |
| Fire hoses and reels unless it is a single-storey building of less than 250 m <sup>2</sup> in floor area OR the facility has no water supply | PHC-E-044 |
| Two 9 kg or equivalent fire extinguishers where the facility has no water supply                                                             | PHC-E-043 |
| Firefighting equipment is maintained according to schedule                                                                                   |           |

## CHECKLIST FOR ELEMENT: FURNITURE IS AVAILABLE AND INTACT IN SERVICE AREAS

**Use the checklist below to check whether facility service areas are equipped  
with sufficient functional furniture**

| Item                                                       |                   |
|------------------------------------------------------------|-------------------|
| <b>Waiting areas</b>                                       |                   |
| Seating                                                    |                   |
| a. Adequate seating for all patients                       | PHC-F-015,016,017 |
| b. Chairs / benches intact                                 |                   |
| Notice boards available                                    | PHC-E-102,104     |
| <b>Consulting rooms</b>                                    |                   |
| Desk                                                       |                   |
| a. Available                                               | PHC-F-007         |
| b. Intact (including the drawers)                          |                   |
| Chair (clinician)                                          |                   |
| a. Available                                               | PHC-F-002         |
| b. Intact                                                  |                   |
| At least 1 chair (patient)                                 |                   |
| a. Available                                               | PHC-F-005         |
| b. Intact                                                  |                   |
| Tilting examination couch                                  |                   |
| a. Available                                               | PHC-F-030         |
| b. Intact                                                  |                   |
| Bedside footstool                                          |                   |
| a. Available                                               | PHC-F-031         |
| b. Intact                                                  |                   |
| Wall-mounted or portable anglepoise-style examination lamp |                   |
| a. Available                                               | PHC-E-110, 154    |
| b. Intact                                                  |                   |
| Lockable medicine cupboards                                |                   |
| Available                                                  | PHC-F-018         |
| Intact                                                     |                   |
| Dressing trolley (at bedside for examination equipment)    |                   |
| Available                                                  | PHC-F-036         |
| Intact (including the drawers)                             |                   |

## CHECKLIST FOR ELEMENT: ESSENTIAL EQUIPMENT IS AVAILABLE AND FUNCTIONAL IN CONSULTING AREAS

Use the checklist below to check whether essential equipment is available and functional in consultation/vital signs and child health rooms

| Item                                                                                                                             |                   |
|----------------------------------------------------------------------------------------------------------------------------------|-------------------|
| <b>CONSULTATION ROOMS</b>                                                                                                        |                   |
| Stethoscope                                                                                                                      | PHC-E-126         |
| Non-invasive Baumanometer (wall mounted/ portable)                                                                               | PHC-E-115,116     |
| Adult, paediatric and large cuffs (3) for Baumanometer                                                                           | PHC-E-115,116     |
| Diagnostic sets including ophthalmic pieces (wall mounted or portable )                                                          | PHC-E-117,118,119 |
| Patella hammer                                                                                                                   | PHC-E-120         |
| Tuning fork (only required in one consultation room)                                                                             | PHC-E-132         |
| Tape measure                                                                                                                     | PHC-E-113         |
| Clinical thermometers                                                                                                            | PHC-E-130,131     |
| <b>VITAL SIGNS ROOM</b><br>(Note if facility is too small to have a vital signs room, check for equipment in consultation rooms) |                   |
| Non-invasive electronic Baumanometer (wall mounted/ portable)                                                                    | PHC-E-116         |
| Adult, paediatric and large cuffs (3) for Baumanometer                                                                           | PHC-E-116         |
| Blood glucometer                                                                                                                 | PHC-E-149         |
| Peak flow meter                                                                                                                  | PHC-E-267         |
| Adult clinical scale up to 150 kg                                                                                                | PHC-E-122,123     |
| Stethoscope                                                                                                                      | PHC-E-126         |
| HB meter                                                                                                                         | PHC-E-152         |
| Clinical thermometer                                                                                                             | PHC-E-130,131     |
| Height measure                                                                                                                   | PHC-E-125         |
| Tape measure                                                                                                                     | PHC-E-113         |
| Bin (general waste)                                                                                                              | PHC-E-003         |
| Urine specimen jars                                                                                                              | PHC-E-150,158     |



| CHILD HEALTH ROOM                                                      |                   |
|------------------------------------------------------------------------|-------------------|
| Baby scale                                                             | PHC-E-124         |
| Bassinet                                                               | PHC-E-025         |
| Stethoscope                                                            | PHC-E-126         |
| Blood glucometer                                                       | PHC-E-149         |
| Non-invasive Baumanometer (wall mounted/ portable)                     | PHC-E-115,116     |
| Paediatric cuff for Baumanometer                                       | PHC-E-115,116     |
| Diagnostic sets including ophthalmic pieces(wall mounted or portable ) | PHC-E-117,118,119 |
| Patella hammer                                                         | PHC-E-120         |
| Tape measure                                                           | PHC-E-113         |
| Clinical thermometers                                                  | PHC-E-130,131     |

## CHECKLIST FOR ELEMENT: RESUSCITATION ROOM IS EQUIPPED WITH FUNCTIONAL, BASIC RESUSCITATION EQUIPMENT

Use the checklist below to check whether the emergency/resuscitation room complies with measures for functional basic equipment

| Item                                                                                    |                     |
|-----------------------------------------------------------------------------------------|---------------------|
| Emergency trolley with lockable medicine drawer and accessories                         | PHC-F-040           |
| Examination couch/2-part obstetric delivery bed                                         | PHC-F-029,030       |
| Wall or ceiling mounted angle-poise-style examination lamp                              | PHC-E-110,111       |
| Nebuliser OR face mask with nebuliser chamber for adult and paediatric                  | PHC-E-137           |
| Functional electric powered OR manual suction devices and suction catheters             | PHC-E-144, 146      |
| Drip stand                                                                              | PHC-F-028           |
| Dressing trolley                                                                        | PHC-F-037, 038, 039 |
| Cardiac arrest board                                                                    | PHC-E-134           |
| Bin (general waste )                                                                    | PHC-E-003           |
| Suture material                                                                         | PHC-C-180, 181, 182 |
| Thermal (space) blanket                                                                 | PHC-C-179           |
| Gloves exam n/sterile gloves: small, medium and large at least one pair of each size    | PHC-C-141, 142, 143 |
| Gloves surgical sterile latex: 6 OR 6.5, 7 OR 7.5 and 8, at least one pair of each size | PHC-C-138, 139, 140 |
| Protective face shields OR Goggles with face mask                                       | PHC-C-080, 079      |
| Disposable plastic aprons                                                               | PHC-C-137           |
| Disposable non-sterile face masks                                                       | PHC-C-077           |
| Resuscitation algorithms                                                                |                     |
| Resuscitation documentation register                                                    |                     |
| Wall-mounted liquid hand soap dispenser                                                 | PHC-E-014           |
| Wall-mounted hand paper dispenser                                                       | PHC-E-020, 021      |

## CHECKLIST FOR ELEMENT: EMERGENCY TROLLEY IS RESTORED DAILY OR AFTER EACH USE

**Use the checklist below to check whether the emergency trolley is sufficiently stocked with unex**

| Item                                                                      |               |
|---------------------------------------------------------------------------|---------------|
| Laryngoscope handle with functional batteries                             | PHC-E-135     |
| Adult curved blades for laryngoscope size 2                               | PHC-E-135     |
| Adult curved blades for laryngoscope size 3                               | PHC-E-135     |
| Adult curved blades for laryngoscope size 4                               | PHC-E-135     |
| Paediatric straight blades for laryngoscope size 1                        | PHC-E-135     |
| Spare bulbs for laryngoscope                                              | PHC-E-135     |
| Spare batteries for laryngoscope sizes                                    |               |
| Endotracheal tubes – uncuffed size 2mm OR 2.5mm                           | PHC-C-086,354 |
| Endotracheal tubes – uncuffed size 3mm OR 3.5mm                           | PHC-C-087,355 |
| Endotracheal tubes – uncuffed size 4.0mm OR 4.5mm                         | PHC-C-088,356 |
| Endotracheal tubes – cuffed size 5.0mm                                    | PHC-C-089     |
| Endotracheal tubes – cuffed size 6.0mm                                    | PHC-C-090     |
| Endotracheal tubes – cuffed size 7.0mm                                    | PHC-C-091     |
| Endotracheal tubes – cuffed size 8.0mm                                    | PHC-C-092     |
| Water-soluble lubricant/lubricating jelly                                 | PHC-C-172     |
| Tape to hold tie endotracheal tube in place                               |               |
| Patella hammer                                                            | PHC-E-120     |
| Oropharyngeal airways (Guedel) size 0                                     | PHC-C-113     |
| Oropharyngeal airways (Guedel) size 1                                     | PHC-C-114     |
| Oropharyngeal airways (Guedel) size 2                                     | PHC-C-115     |
| Oropharyngeal airways (Guedel) size 3                                     | PHC-C-116     |
| Oropharyngeal airways (Guedel) size 4                                     | PHC-C-117     |
| Adult-size introducer, intubating stylet or bougie for endotracheal tubes | PHC-I-125     |

|                                                                                                                         |                   |
|-------------------------------------------------------------------------------------------------------------------------|-------------------|
| Paediatricsize introducer, intubating stylet or bougie for endotracheal tubes                                           | PHC-I-126         |
| Magill's forceps for adults                                                                                             | PHC-I-123         |
| Magill's forceps for paediatric                                                                                         | PHC-I-124         |
| Laryngeal masks (supraglottic airways): adult                                                                           | PHC-C-103, 104    |
| Manual bag valve mask/ manual resuscitator OR self-inflating bag with compatiblemasks for adults                        | PHC-E-142,143     |
| Manual bag valve mask/ manual resuscitator OR self-inflating bag with compatible masks for paediatric                   | PHC-E-140,141     |
| Simple face mask OR reservoir mask OR nasal cannula (prongs) for oxygen, adults                                         | PHC-E-111,108,106 |
| Simple face mask OR reservoir mask OR nasal cannula (prongs) for oxygen, paediatric                                     | PHC-E-110,107,105 |
| Face mask for nebuliser OR face mask with nebuliser chamber for adult OR spacers for MDIs (adults and paediatrics)      | PHC-E-108         |
| Face mask for nebuliser OR face mask with nebuliser chamber for paediatric OR spacers for MDIs (adults and paediatrics) | PHC-E-107         |
| Automatic External Defibrillator (AED) OR ECG monitor and defibrillator                                                 | PHC-E-133         |
| Intravenous cannula 18g green and appropriate strapping                                                                 | PHC-C-101,097     |
| Intravenous cannula 20g pink and appropriate strapping                                                                  | PHC-C-101,098     |
| Intravenous cannula 22g blue and appropriate strapping                                                                  | PHC-C-101,099     |
| Intravenous cannula 24g yellow and appropriate strapping                                                                | PHC-C-101,100     |
| Syringes 3-part: 2ml                                                                                                    | PHC-C-118         |
| Syringes 3-part: 5ml                                                                                                    | PHC-C-119         |
| Syringes 3-part: 10ml OR 20ml                                                                                           | PHC-C-120,349     |
| Syringes: insulin syringes                                                                                              | PHC-C-121         |
| Needles: 18 (pink) OR 20 (yellow)                                                                                       | PHC-C-122,123     |
| Needles: 21 (green)                                                                                                     | PHC-C-124         |
| Needles: 23 (blue) OR 22 (black)                                                                                        | PHC-C-125,126     |
| Sharps container                                                                                                        | PHC-E-005         |
| Admin set 20 drops/ml 1.8m /pack                                                                                        | PHC-C-095         |
| Admin set paed 60 drops/ml 1.8m /pack                                                                                   | PHC-C-096         |
| Stethoscope                                                                                                             | PHC-E-126         |

|                                                                                                               |                   |
|---------------------------------------------------------------------------------------------------------------|-------------------|
| Haemoglobin meter                                                                                             | PHC-E-152         |
| Blood glucometer with testing strips and spare batteries                                                      | PHC-E-149         |
| Diagnostic set and batteries including ophthalmic pieces (wall mounted or portable )                          | PHC-E-117,118,119 |
| Rescue scissors (to cut clothing)                                                                             | PHC-I-020         |
| Paediatric Broselow tape OR Pawper tape                                                                       | PHC-E-128, 129    |
| Wound care (gauze, bandages, cotton wools, plasters, alcohol swabs and antiseptic solutions)                  | PHC-C-147 onwards |
| Urinary (Foley's ) catheters: 14f                                                                             | PHC-C-127         |
| Urinary (Foley's ) catheters: 18f                                                                             | PHC-C-128         |
| Urinary bag specified in the surgical supply list                                                             | PHC-C-129         |
| Nasogastric tubes: 600mmfg8                                                                                   | PHC-C-130         |
| Nasogastric tubes: 1000mmfg10 or 12                                                                           | PHC-C-131, 132    |
| Medication/vaculitre stickers                                                                                 |                   |
| <b>Present individually or in combined multifunctional diagnostic monitoring set</b>                          |                   |
| Pulse oximeter with adult & paediatric probes                                                                 | PHC-E-139         |
| Non invasive electronic blood pressure monitoring device including paediatric, adult & large adult cuff sizes | PHC-E-136, 116    |
| Clinical thermometer (in 0C, non-mercury)                                                                     | PHC-E-130, 131    |
| <b>Emergency medicines (also check expiry dates)</b>                                                          |                   |
| Activated Charcoal                                                                                            |                   |
| Adrenaline injection 1mg/ml (Epinephrine)                                                                     |                   |
| Amlodipine 5mg OR 10mg tablets                                                                                |                   |
| Aspirin tablets                                                                                               |                   |
| Atropine 0.5mg OR 1mg injection                                                                               |                   |
| Benzodiazepine e.g. diazepam injection 5mg/ml injection                                                       |                   |
| Calcium gluconate 10% injection                                                                               |                   |
| Furosemide 20mg ampoule                                                                                       |                   |
| Hydrocortisone 100mg/ml injection                                                                             |                   |
| Insulin, short acting (stored in the medicine fridge)                                                         |                   |
| Ipratropium 0.25mg/2ml OR 0.5mg/2ml unit dose vial for nebulisation OR 40 mcg MDIs                            |                   |

|                                                                                                   |
|---------------------------------------------------------------------------------------------------|
| Isosorbide dinitrate, sublingual, 5mg tablets                                                     |
| Lidocaine/Lignocaine IV 1% OR 2%                                                                  |
| Magnesium sulphate 50%, 1g/2ml ampoule (minimum of 14 ampoules required for one treatment course) |
| Midazolam (1mg/ml OR 5mg/ml) OR Diazepam 5mg/ml                                                   |
| Nifedipine 10mg capsules                                                                          |
| Prednisone 5 mg tablets                                                                           |
| Promethazine 25mg ampoule                                                                         |
| Short-acting sublingual nitrates e.g. glyceryl trinitrate SL OR isosorbide dinitrate              |
| Salbutamol nebulising solution OR nebules OR MDI                                                  |
| Thiamine 100mg injection                                                                          |
| Water for injection                                                                               |
| <b>IV Solutions</b>                                                                               |
| 50% dextrose (20ml ampoule or 50ml bag) OR 10% dextrose solution                                  |
| Pediatric solutions e.g. ½ strength Darrows solution AND neonatalyte solution                     |
| Sodium Chloride 0.9%                                                                              |

## CHECKLIST FOR ELEMENT: THERE IS AN EMERGENCY STERILE OBSTETRIC DELIVERY PACK

Use the checklist below to check whether there is sterile emergency packs available.

| Item                                        | Quantity |           |
|---------------------------------------------|----------|-----------|
| <b>NON-NEGOTIABLE</b>                       |          |           |
| Stitch scissor                              | 1        | PHC-I-009 |
| Episiotomy scissor                          | 1        | PHC-I-019 |
| Cord scissor                                | 1        | PHC-I-018 |
| Dissecting forceps non-toothed (plain)      | 1        | PHC-I-002 |
| Dissecting forceps toothed                  | 1        | PHC-I-001 |
| Artery forceps, straight, long              | 2        | PHC-I-003 |
| Needle holder                               | 1        | PHC-I-008 |
| Small bowl                                  | 2        | PHC-I-012 |
| Kidney dishes OR receivers (big)            | 2        | PHC-I-013 |
| <b>EXTRAS (not part of sterilised pack)</b> |          |           |
| Basin                                       | 1        | PHC-I-021 |
| Stainless-steel round bowl, large           | 1        | PHC-I-022 |
| Green towels                                | 4        |           |
| Disposable apron                            | 2        | PHC-C-137 |
| Gauzes                                      | 5        | PHC-C-150 |
| Vaginal tampons                             | 1        | PHC-C-158 |
| Sanitary towels                             | 2        | PHC-C-156 |
| Round cotton wool balls                     | 1 pack   | PHC-C-148 |
| Umbilical cord clamps                       | 2        | PHC-C-163 |

**CHECKLIST FOR ELEMENT: THERE IS A STERILE PACK FOR MINOR SURGERY**

Use the checklist below to check whether equipment for minor surgery is available

| Item                                                                                                                            | Quantity |           |
|---------------------------------------------------------------------------------------------------------------------------------|----------|-----------|
| <b>MINOR STITCH / SUTURING TRAY</b>                                                                                             |          |           |
| Small stitch tray                                                                                                               | 1        | PHC-I-010 |
| Stitch scissor                                                                                                                  | 1        | PHC-I-009 |
| Toothed forceps                                                                                                                 | 1        | PHC-I-001 |
| Non-toothed forceps                                                                                                             | 1        | PHC-I-002 |
| Bard-Parker surgical blade handle to fit accompanying blades (blades do not form part of sterilised pack but must be available) | 1        | PHC-I-007 |
| Mosquito, straight                                                                                                              | 2        | PHC-I-005 |
| Mosquito, curved                                                                                                                | 2        | PHC-I-006 |
| Artery forceps, straight                                                                                                        | 2        | PHC-I-003 |
| Artery forceps, curved                                                                                                          | 2        | PHC-I-004 |
| Needle holder                                                                                                                   | 1        | PHC-I-008 |
| Swab holder                                                                                                                     | 1        | PHC-I-011 |



## CHECKLIST FOR ELEMENT: COMPLAINTS/COMPLIMENTS /SUGGESTIONS TOOLKIT IS AVAILABLE AT THE MAIN ENTRANCE/EXIT

Use the checklist below to check whether the complaint forms, box and poster  
is available at the main entrance

| Item                                                                                                                                                                                                     |
|----------------------------------------------------------------------------------------------------------------------------------------------------------------------------------------------------------|
| Complaints/compliments/suggestions boxes are visibly placed at main entrance/exit                                                                                                                        |
| Official complaint/compliment/suggestion forms and pen are at the box at the main entrance/exit                                                                                                          |
| A standardised poster describing the process to follow to lodge a complaint, give a compliment or make a suggestion is visibly displayed at the entrance of the facility in at least two local languages |

PHC-E-100

**CHECKLIST FOR ELEMENT: SHARPS ARE DISPOSED OF APPROPRIATELY**

Use the checklist below to check whether sharps are disposed of appropriately

| Item                                                                     |
|--------------------------------------------------------------------------|
| Waste is properly segregated                                             |
| Sharps are disposed of in impenetrable, tamperproof containers           |
| Sharps containers are disposed of when they reach the limit mark         |
| Sharps containers are placed on work surface or in wall mounted brackets |

PHC-E-005

## CHECKLIST FOR ELEMENT: TEMPERATURE OF THE MEDICINE ROOM/DISPENSARY IS MAINTAINED WITHIN THE SAFETY RANGE

Use the checklist below to check whether the medicine in the medicine room/dispensary is maintained within the safety range

| Item                                                                  |           |
|-----------------------------------------------------------------------|-----------|
| There is at least one functional, wall-mounted room thermometer       | PHC-E-114 |
| The temperature of the pharmacy is recorded daily                     | PHC-C-134 |
| The temperature of the pharmacy is maintained within the safety range |           |

## CHECKLIST FOR ELEMENT: COLD CHAIN PROCEDURE FOR VACCINES IS MAINTAINED

Use the checklist below to check whether the cold chain for vaccines is maintained

| Item                                                                                                  |                                             |
|-------------------------------------------------------------------------------------------------------|---------------------------------------------|
| There is a standard operating procedure for the maintenance of cold chain for vaccines                |                                             |
| Facility has a vaccine or medicine refrigerator with a thermometer                                    | PHC-F-042, 043, 049, 050,<br>PHC-E-153, 042 |
| The temperature of the refrigerator is recorded twice daily, 7 hours apart (check one month's record) | PHC-C-135                                   |
| The temperature of the refrigerator is maintained between 2-8 °C (check one month's record)           |                                             |
| There is a cooler box for storage of vaccines if needed                                               | PHC-E-035                                   |
| Ice packs are available for use as needed                                                             | PHC-C-203                                   |

## CHECKLIST FOR ELEMENT: SPECIMENS ARE COLLECTED, PACKED, STORED AND PREPARED FOR TRANSPORTATION ACCORDING TO THE PRIMARY HEALTH CARE LABORATORY HANDBOOK

Use the checklist below to check whether specimens are handled according to  
the PHC Laboratory Handbook

### Grouping of specimens

| Group A                                               | Group B   | Group C                                    |
|-------------------------------------------------------|-----------|--------------------------------------------|
| Blood<br>Pleural effusion<br>Sputum<br>Stool<br>Urine | Pap smear | MCS (Microscopy, culture band sensitivity) |

| Item                                                                                                                  |           |
|-----------------------------------------------------------------------------------------------------------------------|-----------|
| <b>General</b>                                                                                                        |           |
| Specimens are clearly labelled                                                                                        |           |
| Each laboratory request form is correctly completed                                                                   |           |
| There is at least one functional wall mounted thermometer in area for lab specimens are stored for courier collection | PHC-E-114 |
| The temperature of the storage area for lab specimens is recorded daily                                               | PHC-C-134 |
| <b>Group A specimens</b>                                                                                              |           |
| Samples are kept away from direct sunlight                                                                            |           |
| Where the room temperature exceeds 25°C, samples are stored in the fridge (at +/- 5°C)                                | PHC-F-022 |
| Length of storage does not exceed 24 hours, stored at room temperature (+/- 20-25°C)                                  |           |
| <b>Group B specimens</b>                                                                                              |           |
| Stored at room temperature                                                                                            |           |
| Stored inside a slide carrier (envelope)                                                                              |           |
| <b>Group C specimens</b>                                                                                              |           |
| Samples placed into the transport medium provided (where appropriate)                                                 |           |
| Samples kept away from direct sunlight                                                                                |           |
| Where room temperature exceeds 25°C, samples are stored in the fridge (+/- 5°C)                                       | PHC-F-022 |
| Length of storage does not exceed 24 hours, stored at room temperature (+/- 20-25°C)                                  |           |

## CHECKLIST FOR ELEMENT: HEALTH CARE WASTE ARE MANAGED APPROPRIATELY

**Use the checklist below to check whether health risk care waste is managed appropriately**

| Item                                                                                    |                   |
|-----------------------------------------------------------------------------------------|-------------------|
| Sanitary disposal bins with functional lids OR health care risk waste box               | PHC-E-004         |
| * Sanitary disposal bins/boxes lined with appropriate colour plastic bags               | PHCC196           |
| Sanitary disposal bins/boxes are clean and not overflowing                              |                   |
| Health care risk waste disposal bins with functional lids OR health care risk waste box | PHC-E-047         |
| Health care risk waste disposal bins/boxes lined with red colour plastic bags           | PHC-C-195         |
| Health care risk waste disposal bins/boxes contain only health care waste               |                   |
| Health care risk waste disposal bins/boxes are not overflowing                          |                   |
| Bins available for general waste                                                        | PHC-E-046, 049    |
| Bins for general waste are lined with appropriate coloured bags                         | PHC-C-190 onwards |

\* If disposable boxes for sanitary waste is used where gel granules in the bottom of the box treat the waste, no bag is required and facility can score "Y"

## CHECKLIST FOR ELEMENT: THERE IS A STANDARD SECURITY GUARD ROOM OR THE FACILITY HAS AN ALARM SYSTEM LINKED TO ARMED RESPONSE

Use the checklist below to check whether facility security adheres to standard guidelines

| Item                                                                                                                                                                                                                          |           |
|-------------------------------------------------------------------------------------------------------------------------------------------------------------------------------------------------------------------------------|-----------|
| Does the facility have an alarm system linked to armed response (if Yes, checklist for security guardroom and security equipment must not be assessed. If No, assess checklist for security guardroom and security equipment) |           |
| Security guard room                                                                                                                                                                                                           |           |
| Kitchenette – sink with cupboard underneath                                                                                                                                                                                   |           |
| Table                                                                                                                                                                                                                         | PHC-F-008 |
| Chair                                                                                                                                                                                                                         | PHC-F-003 |
| Functioning lights                                                                                                                                                                                                            |           |
| Security equipment for security officer(s) and accompanying stationery                                                                                                                                                        |           |
| Baton                                                                                                                                                                                                                         |           |
| Handcuffs OR Cable ties                                                                                                                                                                                                       |           |
| Incident book                                                                                                                                                                                                                 |           |
| Metal detector                                                                                                                                                                                                                |           |
| Telephone OR two-way radio OR dedicated cellphone                                                                                                                                                                             |           |

**CHECKLIST FOR ELEMENT: ALL STAFF MEMBERS WEAR AN IDENTIFICATION TAG**

Use the checklist below to check that the staff on duty wear official identification tags

| Staff member   |           |
|----------------|-----------|
| Staff member 1 | PHC-C-202 |
| Staff member 2 | PHC-C-202 |
| Staff member 3 | PHC-C-202 |
| Staff member 4 | PHC-C-202 |
| Staff member 5 | PHC-C-202 |

**Note:** Identification tag must include the emblem of the facility/district or provincial department of health, full names/ initials and surname of the staff member



## CHECKLIST FOR ELEMENT: HAND HYGIENE AND SANITARY FACILITIES ARE AVAILABLE

**Use the checklist below to check whether there is running water, toilet paper, liquid hand wash soap and disposable hand paper towels**

| Item                                 |                |
|--------------------------------------|----------------|
| <b>Toilet</b>                        |                |
| Functional hand wash basin with taps |                |
| Running water                        |                |
| Toilet paper                         | PHC-C-081      |
| Liquid hand wash soap/sanitiser      | PHC-C-058      |
| Disposable hand paper towels         | PHC-C-072, 073 |
| <b>Consultation room</b>             |                |
| Functional hand wash basin with taps |                |
| Running water                        |                |
| Liquid hand wash soap/sanitiser      | PHC-C-058      |
| Disposable hand paper towels         | PHC-C-072, 073 |
| <b>Vital signs room</b>              |                |
| Functional hand wash basin with taps |                |
| Running water                        |                |
| Liquid hand wash soap/sanitiser      | PHC-C-058      |
| Disposable hand paper towels         | PHC-C-072, 073 |

# Ideal Community Health Centre Checklists

## CHECKLIST FOR ELEMENT: STAFF WEAR APPROPRIATE PERSONAL PROTECTIVE CLOTHING AT THE 8 HOUR SERVICE AREA

Use the checklist below to check whether protective clothing is available and worn

| Item                                                        |                     |
|-------------------------------------------------------------|---------------------|
| Gloves – non sterile                                        | PHC-C-141, 142, 143 |
| Gloves – sterile                                            | PHC-C-138, 139, 140 |
| Disposable gowns OR aprons                                  | PHC-C-076, 137      |
| Protective face shields OR goggles with surgical face masks | PHC-C-080, 079, 077 |

## CHECKLIST FOR ELEMENT: STAFF WEAR APPROPRIATE PERSONAL PROTECTIVE CLOTHING AT THE 24 HOUR EMERGENCY UNIT

Use the checklist below to check whether protective clothing is available and worn

| Item                                                        |                     |
|-------------------------------------------------------------|---------------------|
| Gloves – non sterile                                        | PHC-C-141, 142, 143 |
| Gloves – sterile                                            | PHC-C-138, 139, 140 |
| Disposable gowns OR aprons                                  | PHC-C-076, 137      |
| Protective face shields OR goggles with surgical face masks | PHC-C-080, 079, 077 |

**CHECKLIST FOR ELEMENT: STAFF WEAR APPROPRIATE PERSONAL PROTECTIVE CLOTHING AT THE MOU**

Use the checklist below to check whether protective clothing is available and worn

| Item                                                        |                     |
|-------------------------------------------------------------|---------------------|
| Gloves – non sterile                                        | PHC-C-141, 142, 143 |
| Gloves – sterile                                            | PHC-C-138, 139, 140 |
| Disposable gowns OR aprons                                  | PHC-C-076, 137      |
| Protective face shields OR goggles with surgical face masks | PHC-C-080, 079, 077 |

## CHECKLIST FOR ELEMENT: COMPLAINTS/COMPLIMENTS/SUGGESTIONS TOOLKIT IS AVAILABLE AT THE MAIN ENTRANCE/EXIT AT THE 8 HOUR SERVICE AREA

Use the checklist below to check whether the complaint forms, box and poster is available

| Item                                                                                                                                                                                                     |
|----------------------------------------------------------------------------------------------------------------------------------------------------------------------------------------------------------|
| Complaints/compliments/suggestions boxes are visibly placed at main entrance/exit                                                                                                                        |
| Official complaint/compliment/suggestion forms and pen are at the box at the main entrance/exit                                                                                                          |
| A standardised poster describing the process to follow to lodge a complaint, give a compliment or make a suggestion is visibly displayed at the entrance of the facility in at least two local languages |

PHC-E-100

## CHECKLIST FOR ELEMENT: COMPLAINTS/COMPLIMENTS/ SUGGESTIONS TOOLKIT IS AVAILABLE AT THE 24 HOUR EMERGENCY UNIT

Use the checklist below to check whether the complaint forms, box and poster is available

| Item                                                                                                                                                                                                     |
|----------------------------------------------------------------------------------------------------------------------------------------------------------------------------------------------------------|
| Complaints/compliments/suggestions boxes are visibly placed at main entrance/exit                                                                                                                        |
| Official complaint/compliment/suggestion forms and pen are at the box at the main entrance/exit                                                                                                          |
| A standardised poster describing the process to follow to lodge a complaint, give a compliment or make a suggestion is visibly displayed at the entrance of the facility in at least two local languages |

PHC-E-100

## CHECKLIST FOR ELEMENT: COMPLAINTS/COMPLIMENTS/ SUGGESTIONS TOOLKIT IS AVAILABLE AT THE MAIN ENTRANCE/EXIT AT THE MOU

Use the checklist below to check whether the complaint forms, box and poster is available

| Item                                                                                                                                                                                                     |
|----------------------------------------------------------------------------------------------------------------------------------------------------------------------------------------------------------|
| Complaints/compliments/suggestions boxes are visibly placed at main entrance/exit                                                                                                                        |
| Official complaint/compliment/suggestion forms and pen are at the box at the main entrance/exit                                                                                                          |
| A standardised poster describing the process to follow to lodge a complaint, give a compliment or make a suggestion is visibly displayed at the entrance of the facility in at least two local languages |

PHC-E-100

## CHECKLIST FOR ELEMENT: BASIC MEDICAL SUPPLIES (CONSUMABLES) ARE AVAILABLE

**Use the checklist below to check the availability of medical and dressing supplies**

| SURGICAL SUPPLIES                                    |           |
|------------------------------------------------------|-----------|
| Item                                                 |           |
| Intravenous administration set 20 drops/ml           | PHC-C-095 |
| Intravenous admin set paed 60 drops/ml               | PHC-C-096 |
| Blade stitch cutter sterile/pack                     | PHC-C-145 |
| Blood collecting vacutainer (holding barrel/bulldog) |           |
| Blood lancets (haemolance)                           | PHC-C-146 |
| Urinary (Foley's) catheter silicone/latex 8f         | PHC-C-343 |
| Urinary (Foley's) catheter silicone/latex 10f        | PHC-C-344 |
| Urinary (Foley's) catheter silicone/latex 12f        | PHC-C-345 |
| Urinary (Foley's) catheter silicone/latex 14f        | PHC-C-127 |
| Urinary (Foley's) catheter silicone/latex 16f        | PHC-C-346 |
| Urinary (Foley's) catheter silicone/latex 18f        | PHC-C-128 |
| Urinary (Foley's) catheter silicone/latex 20f        | PHC-C-347 |
| Urinary (Foley's) catheter silicone/latex 22f        | PHC-C-348 |
| Catheter suction resp 500mm 06f                      | PHC-C-359 |
| Catheter suction resp 500mm 08f                      | PHC-C-360 |
| Catheter suction resp 500mm 10f                      | PHC-C-361 |
| Catheter suction resp 500mm 12f                      | PHC-C-362 |
| Catheter suction resp 500mm 14f                      | PHC-C-363 |
| Catheter thoracic silicone st20                      | PHC-C-364 |
| Catheter thoracic silicone st24                      | PHC-C-365 |
| Catheter thoracic silicone st28                      | PHC-C-366 |
| Catheter thoracic silicone st30                      | PHC-C-367 |



|                                                                                     |                   |
|-------------------------------------------------------------------------------------|-------------------|
| Catheter thoracic silicone st32                                                     | PHC-C-368         |
| Drainage sys chest u/water adult                                                    | PHC-C-369         |
| Urine drainage bag                                                                  | PHC-C-129         |
| Simple face mask OR reservoir mask OR nasal cannula (prongs) for oxygen, adults     | PHC-C-108,106,111 |
| Simple face mask OR reservoir mask OR nasal cannula (prongs) for oxygen, paediatric | PHC-C-110,105,107 |
| Face mask for nebuliser OR face mask with nebuliser chamber for adult               | PHC-C-107         |
| Face mask for nebuliser OR face mask with nebuliser chamber for paediatric          | PHC-C-108         |
| Nasogastric feeding tube 600mm fg5                                                  | PHC-C-342         |
| Nasogastric feeding tube 600mm fg8                                                  | PHC-C-130         |
| Nasogastric feeding tube 1000mm fg10 OR 12                                          | PHC-C-131,132     |
| Disposable aprons                                                                   | PHC-C-137         |
| Eye patches (disposable)                                                            | PHC-C-165         |
| Disposable razors                                                                   | PHC-C-166         |
| Disposable Amnihook                                                                 | PHC-C-171         |
| Ultrasound gel medium viscosity                                                     | PHC-C-173         |
| Gloves exam n/sterile large /box                                                    | PHC-C-143         |
| Gloves exam n/sterile medium /box                                                   | PHC-C-142         |
| Gloves exam n/sterile small /box                                                    | PHC-C-141         |
| Gloves surg sterile latex sz 6 OR6.5 OR Small/box                                   | PHC-C-138         |
| Gloves surg sterile latex sz 7OR 7.5 OR medium/box                                  | PHC-C-139         |
| Gloves surg sterile latex sz 8 OR large/box                                         | PHC-C-140         |
| Endotracheal tubes – uncuffed size 2mm OR 2.5mm                                     | PHC-C-086,354     |
| Endotracheal tubes – uncuffed size 3mm OR 3.5mm                                     | PHC-C-087,355     |
| Endotracheal tubes – uncuffed size 4.0mm OR 4.5mm                                   | PHC-C-088,356     |
| Endotracheal tubes – cuffed size 5.0mm                                              | PHC-C-089         |
| Endotracheal tubes – cuffed size 6.0mm                                              | PHC-C-090         |
| Tube stomach washout 24fg                                                           | PHC-C-369         |

|                                           |               |
|-------------------------------------------|---------------|
| Tube,stomach washout 26fg                 | PHC-C-370     |
| Tube,stomach washout 28fg                 | PHC-C-371     |
| Tube stomach washout 30fg                 | PHC-C-372     |
| Sheath incontinence 25mm                  | PHC-C-373     |
| Sheath incontinence 30mm                  | PHC-C-374     |
| Sheath incontinence 35mm                  | PHC-C-375     |
| Intravenous cannula(Jelco)18g green/box   | PHC-C-097     |
| Intravenous cannula(Jelco)20g pink/box    | PHC-C-098     |
| Intravenous cannula (Jelco)22g blue/box   | PHC-C-099     |
| Intravenous cannula (Jelco)24g yellow/box | PHC-C-100     |
| Needles: 18 (pink) OR 20 (yellow)/box     | PHC-C-122,123 |
| Needles: 21 (green)/box                   | PHC-C-124     |
| Needles: 22 (black)/box                   | PHC-C-126     |
| Needles: 23 (blue)/box                    | PHC-C-125     |
| Needles: 25 /box                          | PHC-C-386     |
| * Syringes 3-part 2ml/box                 | PHC-C-118     |
| * Syringes 3-part 5ml/box                 | PHC-C-119     |
| * Syringes 3-part 10 ml/box               | PHC-C-120     |
| * Syringes 3-part 20ml/box                | PHC-C-349     |
| Insulin syringe with needle /box          | PHC-C-121     |
| Dental syringe and needle for LA          | PHC-C-180     |
| Suture chromic g0/0 or g1/0 1/2 75cm      | PHC-C-181     |
| Suture nylon g2/0 or g3/0 3/8 45cm        | PHC-C-182     |
| Suture nylon g4/0 3/8 45cm                | PHC-C-098     |

| <b>Only applicable if the facility uses older HB model</b>                                                        |           |                |
|-------------------------------------------------------------------------------------------------------------------|-----------|----------------|
| Haemolysis applicator sticks                                                                                      |           | PHC-C-167      |
| HB meter clip                                                                                                     |           | PHC-C-168      |
| HB chamber glass-grooved                                                                                          |           | PHC-C-169      |
| HB cover glass-plain                                                                                              |           | PHC-C-170      |
| <b>Only applicable if facility uses an Automatic External Defibrillator (AED)</b>                                 |           |                |
| Replacement pads for AED – adult                                                                                  |           | PHC-C-108      |
| Replacement pads for AED - paediatric                                                                             |           | PHC-C-175      |
| <b>DRESSINGS SUPPLIES</b>                                                                                         |           |                |
| Item                                                                                                              | Pack size |                |
| Plaster roll                                                                                                      | 1         | PHC-C-153      |
| Bandage crepe                                                                                                     | 1         | PHC-C-147      |
| Gauze paraffin 100x100 /box                                                                                       | 1         | PHC-C-152      |
| Gauze swabs plain n/s 100x100x8ply/pack                                                                           | 100       | PHC-C-151      |
| Gauze abs grade 1 burn /pack                                                                                      | 1         | PHC-C-150      |
| Basic disposable dressing pack(should contain as a minimum cotton wool balls, swabs, 2 forceps, disposable drape) | 1         | PHC-C-149      |
| Cotton wool balls 1g 500`s                                                                                        |           | PHC-C-148      |
| * Skin traction kit - adult (elast 0468)                                                                          |           | PHC-C-376      |
| * Skin traction kit - child (elast 0469)                                                                          |           | PHC-C-377      |
| * Sodium carboxymethylcel (intrasite) 15g                                                                         |           |                |
| Sanitary towels maternity /pack                                                                                   | 12        | PHC-C-156      |
| Stockinette 100mm OR150mm/roll                                                                                    | 1         | PHC-C-154, 186 |
| Adhesive micro-porous surgical tape 24/25mm or 48/50mm                                                            | 1         | PHC-C-159, 185 |
| 70% isopropyl alcohol prep Pads 24x30 1ply OR 2 ply /box                                                          | 200       | PHC-C-155      |

## CHECKLIST FOR ELEMENT: BASIC CONSUMABLES ARE AVAILABLE FOR THE REHABILITATION TREATMENT AREA

Use the checklist below to check the availability of consumable for the rehabilitation treatment area

| Item                                             |                 |
|--------------------------------------------------|-----------------|
| Batteries: hearing aid                           | PHC-C-265 - 268 |
| Bicarbonate of soda sachets                      | PHC-C-269       |
| Breadboard - one-handed                          | PHC-C-270       |
| Cable ties, nylon, medium                        | PHC-C-271       |
| Cable ties, nylon, long                          | PHC-C-272       |
| Cardboard A4 coloured                            | PHC-C-273       |
| Coloured writing instruments                     | PHC-C-274       |
| Contact adhesive                                 | PHC-C-217       |
| Cerumen curette: replacement curettes            | PHC-C-275       |
| Cerumen curette: replacement globe               | PHC-C-276       |
| Cushion: wheelchair, thin, positioned            | PHC-C-277       |
| Cushion: wheelchair, thick, pressure care        | PHC-C-278       |
| Cushion cover: basic stretchable                 | PHC-C-279       |
| Cushion cover: waterproof                        | PHC-C-280       |
| Ear mould impression material and scoop          | PHC-C-281       |
| Ear mould impression material catalyst           | PHC-C-282       |
| Ear mould impression Otolight: replacement globe | PHC-C-283       |
| Ear mould impression Otolight: replacement tips  | PHC-C-284       |
| Ear mould impression Otostops 3 sizes            | PHC-C-285 - 287 |
| Exercise band latex                              | PHC-C-288 - 292 |
| Feeding cup                                      | PHC-C-293       |
| Feeding spoon                                    | PHC-C-294       |
| Ferrule: rubber 4 sizes                          | PHC-C-295 - 297 |

|                                        |                 |
|----------------------------------------|-----------------|
| EVA foam                               | PHC-C-298       |
| Foam HD compressed                     | PHC-C-301 - 302 |
| Foam high-density                      | PHC-C-299 - 300 |
| Masonite                               | PHC-C-303       |
| Oil: arnica                            | PHC-C-304       |
| Paper: print-out, tympanometer         | PHC-C-305       |
| Pelvic strap 5cm                       | PHC-C-335       |
| Pelvic strap 3cm                       | PHC-C-336       |
| Pressure garment material (Elastonet)  | PHC-C-306 - 308 |
| Sewing kit                             | PHC-C-309       |
| Splinting material 6 sizes             | PHC-C-310 - 315 |
| Splinting material: thermoplastic tape | PHC-C-316 - 317 |
| Superglue (cyanoacrylate)              | PHC-C-041       |
| Toothbrush, large                      | PHC-C-258       |
| Towelling                              | PHC-C-318 - 320 |
| Varnish (wood)                         | PHC-C-321       |
| Velcro circles (hook and loop)         | PHC-C-322 - 323 |
| Velcro hook tape 2 sizes               | PHC-C-325       |
| Velcro loop tape 2 sizes               | PHC-C-324       |
| Washboard one-handed                   | PHC-C-326       |
| Waterproof wood glue                   | PHC-C-042       |
| Wheelchair gloves                      | PHC-C-337       |
| Wheelchair spares kit                  | PHC-C-327       |

## CHECKLIST FOR ELEMENT: BASIC MEDICAL SUPPLIES (CONSUMABLES) ARE AVAILABLE FOR THE ORAL HEALTH SERVICES

Use the checklist below to check the availability of consumable for the Oral Health Services

| SURGICAL SUPPLIES                                          |                     |
|------------------------------------------------------------|---------------------|
| Item                                                       |                     |
| <b>Exodontia (tooth extraction) and minor oral surgery</b> |                     |
| Apron, dental, plastic Adult                               | PHC-C-224           |
| Apron, dental, plastic child                               | PHC-C-225           |
| Surgical blades No.11 and No. 12                           | PHC-C-333, 334      |
| Chlorhexidine oral rinse 0,2%                              |                     |
| Cotton wool balls                                          | PHC-C-148           |
| Dry socket alveolar paste                                  | PHC-C-235           |
| Ethyl chloride                                             |                     |
| Haemostat sponge                                           | PHC-C-249           |
| Hydrogen peroxide                                          |                     |
| Hypodermic needles (disposable)                            | PHC-C-176, 177      |
| Saline solution                                            |                     |
| Saliva ejectors (disposable)                               | PHC-C-256, 257      |
| Sutures surgical                                           | PHC-C-330, 331, 332 |
| Topical anaesthetic                                        | PHC-C-223           |
| Local anaesthetic (without vasoconstrictor)                |                     |
| <b>Conservative (preventive) dentistry</b>                 |                     |
| Fissure sealants                                           | PHC-C-236           |
| Amalgam capsules                                           | PHC-C-222           |
| Composite                                                  | PHC-C-231, 232      |
| Fluoride gel                                               | PHC-C-245, 246, 247 |
| Varnish cavity liner                                       | PHC-C-264           |
| Prophylaxis paste                                          | PHC-C-250           |

|                                        |                     |
|----------------------------------------|---------------------|
| Cements /liners (kalzinol, Dycal etc.) | PHC-C-230           |
| Articulating paper                     | PHC-C-226           |
| Cotton wool pellets                    | PHC-C-254, 255      |
| Polyester strips (composite)           | PHC-C-242, 243, 244 |
| Glass ionomers                         | PHC-C-248           |
| Polishing strips                       | PHC-C-252, 253      |
| Polishing kit                          | PHC-C-251           |
| Dental floss                           | PHC-C-234           |
| Fluoride trays                         | PHC-C-242, 243, 244 |
| Acid etch and bonding agent            | PHC-C-228           |
| Dentin bonding agents                  | PHC-C-252, 253      |
| <b>School outreach</b>                 |                     |
| Toothpaste, dental, fluoride           | PHC-C-261, 262, 263 |
| Toothbrushes                           | PHC-C-258, 259, 260 |

## CHECKLIST FOR ELEMENT: REQUIRED FUNCTIONAL DIAGNOSTIC EQUIPMENT AND CONCURRENT CONSUMABLES FOR POINT OF CARE TESTING ARE AVAILABLE

Use the checklist below to check the availability of laboratory equipment and consumables in the various areas where they are used

| Item                                                                      |                |
|---------------------------------------------------------------------------|----------------|
| Laboratory equipment and consumables                                      |                |
| Hb meter                                                                  | PHC-E-152      |
| Blood glucometer                                                          | PHC-E-149      |
| Spare batteries for blood glucometer                                      |                |
| Glass slides for cervical smears                                          |                |
| Lancets                                                                   | PHC-C-146      |
| Blood glucose strips                                                      | PHC-C-181      |
| Urine dipsticks                                                           | PHC-C-205      |
| Urine specimen jar OR flask                                               | PHC-E-151, 158 |
| Malaria rapid test (where applicable in facilities in KZN, GP, MP and LP) | PHC-C-200      |
| Rapid HIV test                                                            | PHC-C-199      |
| Rh 'D' (Rhesus factor) test                                               | PHC-C-204      |



## CHECKLIST FOR ELEMENT: DISINFECTANT, CLEANING MATERIALS AND EQUIPMENT ARE AVAILABLE

**Use the checklist below to check whether the disinfectant, cleaning materials and equipment are available**

| Disinfectant and cleaning Material                                                                              |                      |
|-----------------------------------------------------------------------------------------------------------------|----------------------|
| High-level disinfection for medical equipment (e.g. sodium perborate powder OR phthalaldehyde)                  | PHC-C-063, 034, 035  |
| Chlorine compounds (e.g. Biocide D or Clorox)                                                                   | PHC-C-062            |
| Sanitary all-purpose cleaner                                                                                    | PHC-C-136            |
| Detergent-based solutions                                                                                       | PHC-C-065            |
| Wet polymer (floor polish)                                                                                      | PHC-C-066            |
| Protective polymer (strippers)                                                                                  | PHC-C-067            |
| All cleaning materials clearly labelled                                                                         |                      |
| Materials Safety Data Sheets for all cleaning products                                                          |                      |
| Cleaning equipment                                                                                              |                      |
| Two-way bucket system for mopping floors (bucket for clean water and bucket for dirty water) OR Janitor trolley | PHC-E-030            |
| Colour labelled mop – Red for toilets and bathrooms                                                             | PHC-E-015            |
| Colour labelled mop – Blue for clinical areas and non-clinical service areas                                    | PHC-E-016            |
| Mop labelled for cleaning exterior areas                                                                        | PHC-E-017            |
| Green bucket and cloths for bathroom and consulting room basins                                                 | PHC-E-009, PHC-C-187 |
| Red bucket and cloths for toilet                                                                                | PHC-E-007            |
| White cloths for kitchen                                                                                        | PHC-C-189            |
| Blue bucket and cloths for clinical areas and non-clinical service areas                                        | PHC-E-008, PHC-C-188 |
| Spray bottle for disinfectant solution                                                                          | PHC-E-022            |
| Window cleaning squeegee                                                                                        | PHC-E-150            |
| Mop sweeper or soft-platform broom                                                                              | PHC-E-018            |
| Floor polisher                                                                                                  | PHC-F-020            |

**CHECKLIST FOR ELEMENT: FUNCTIONAL FIREFIGHTING EQUIPMENT IS AVAILABLE**

Use the checklist below to check whether firefighting equipment is available

| Item                                                                                                                                         |           |
|----------------------------------------------------------------------------------------------------------------------------------------------|-----------|
| Fire extinguishers                                                                                                                           | PHC-E-043 |
| Fire hoses and reels unless it is a single-storey building of less than 250 m <sup>2</sup> in floor area OR the facility has no water supply | PHC-E-044 |
| Two 9 kg or equivalent fire extinguishers where the facility has no water supply                                                             | PHC-E-043 |
| Firefighting equipment is maintained according to schedule                                                                                   |           |

## CHECKLIST FOR ELEMENT: FURNITURE IS AVAILABLE AND INTACT AT 8 HOUR SERVICE AREAS

Use the checklist below to check whether facility service areas are equipped with sufficient functional furniture in the 8 hour service area

| Item                                                    |                   |
|---------------------------------------------------------|-------------------|
| <b>Waiting areas</b>                                    |                   |
| Seating                                                 |                   |
| a. Adequate seating for all patients                    | PHC-F-015,016,017 |
| b. Chairs / benches intact                              |                   |
| Notice boards available                                 | PHC-E-102,104     |
| <b>Consulting rooms</b>                                 |                   |
| Desk                                                    |                   |
| a. Available                                            | PHC-F-007         |
| b. Intact (including the drawers)                       |                   |
| Chair (clinician)                                       |                   |
| a. Available                                            | PHC-F-002         |
| b. Intact                                               |                   |
| At least 1 chair (patient)                              |                   |
| a. Available                                            | PHC-F-005         |
| b. Intact                                               |                   |
| Tilting examination couch                               |                   |
| a. Available                                            | PHC-F-030         |
| b. Intact                                               |                   |
| Bedside footstool                                       |                   |
| a. Available                                            | PHC-F-031         |
| b. Intact                                               |                   |
| Lockable medicine cupboards                             |                   |
| a. Available                                            | PHC-F-018         |
| b. Intact                                               |                   |
| Dressing trolley (at bedside for examination equipment) |                   |
| a. Available                                            | PHC-F-036         |
| b. Intact (including the drawers)                       |                   |

## CHECKLIST FOR ELEMENT: ESSENTIAL EQUIPMENT IS AVAILABLE AND FUNCTIONAL AT THE 8 HOUR SERVICES

Use the checklist below to check whether essential equipment is available and functional in consultation/vital signs and child health rooms

| Item                                                                    |                   |
|-------------------------------------------------------------------------|-------------------|
| CONSULTATION ROOMS                                                      |                   |
| Stethoscope                                                             | PHC-E-126         |
| Non-invasive Baumanometer (wall mounted/ portable)                      | PHC-E-115,116     |
| Adult, paediatric and large cuffs (3) for Baumanometer                  | PHC-E-115,116     |
| Diagnostic sets including ophthalmic pieces (wall mounted or portable ) | PHC-E-117,118,119 |
| Patella hammer                                                          | PHC-E-120         |
| Tuning fork (only required in one consultation room)                    | PHC-E-132         |
| Tape measure                                                            | PHC-E-113         |
| Clinical thermometers                                                   | PHC-E-130,131     |
| Wall mounted or portable angle poise style examination lamp             | PHC-E-110, 154    |
| Blood glucometer                                                        | PHC-E-149         |
| Peak flow meter                                                         | PHC-E-267         |
| Adult clinical scale up to 150 kg                                       | PHC-E-122,123     |
| HB meter                                                                | PHC-E-152         |
| Height measure                                                          | PHC-E-125         |
| Urine specimen jars                                                     | PHC-E-150,158     |
| Baby scale                                                              | PHC-E-124         |
| Bassinet on stand                                                       | PHC-E-025         |

## CHECKLIST FOR ELEMENT: FURNITURE IS AVAILABLE AND INTACT IN THE REHABILITATION TREATMENT AREA

Use the checklist below to check whether facility service areas are equipped with sufficient functional furniture in the Rehabilitation treatment area

| Item                                 |                   |
|--------------------------------------|-------------------|
| <b>Waiting areas</b>                 |                   |
| Seating                              |                   |
| c. Adequate seating for all patients | PHC-F-015,016,017 |
| d. Chairs / benches intact           |                   |
| Notice boards available              | PHC-E-102,104     |
| <b>Treatment area</b>                |                   |
| Desk                                 |                   |
| a. Available                         | PHC-F-007         |
| b. Intact (including the drawers)    |                   |
| Chair (clinician)                    |                   |
| a. Available                         | PHC-F-002         |
| b. Intact                            |                   |
| At least 1 chair (patient)           |                   |
| a. Available                         | PHC-F-005         |
| b. Intact                            |                   |
| Tilting examination couch            |                   |
| a. Available                         | PHC-F-030         |
| b. Intact                            |                   |
| Bedside footstool                    |                   |
| a. Available                         | PHC-F-031         |
| b. Intact                            |                   |
| Instrument trolley                   |                   |
| a. Available                         | PHC-F-038         |
| b. Intact                            |                   |
| Bar fridge                           |                   |
| a. Available                         | PHC-F-022         |
| b. Intact                            |                   |

## CHECKLIST FOR ELEMENT: ESSENTIAL EQUIPMENT IS AVAILABLE AND FUNCTIONAL AT THE HEALTH SUPPORT SERVICE TREATMENT AREAS

Use the checklist below to check whether essential equipment is available and functional in rehabilitation treatment area

| Item                            |           |
|---------------------------------|-----------|
| <b>PHYSICAL THERAPY</b>         |           |
| <b>Equipment – Clinical</b>     |           |
| Aluminium crutches – Adult      | PHC-E-212 |
| Aluminium crutches – paediatric | PHC-E-213 |
| Balance pad                     | PHC-E-214 |
| Basin, portable, large          | PHC-E-215 |
| Bobath Ball: 85cm               | PHC-E-216 |
| Bobath Ball: 65cm               | PHC-E-217 |
| Bobath Ball: 45cm               | PHC-E-218 |
| Bobath roller: 50cm             | PHC-E-219 |
| Bobath roller: 30cm             | PHC-E-220 |
| Construction Play equipment     | PHC-E-221 |
| Hot water bottle                | PHC-E-222 |
| Mat: gym                        | PHC-E-223 |
| Mirror: hand-held with cover    | PHC-E-224 |
| Mirror: hand-held with handle   | PHC-E-225 |
| Nebuliser: ultrasonic           | PHC-E-137 |
| Patella hammer                  | PHC-E-120 |
| Soccer ball                     | PHC-E-226 |
| Standing frame –large           | PHC-E-229 |
| Standing frame –medium          | PHC-E-228 |
| Standing frame –small           | PHC-E-227 |

|                                 |           |
|---------------------------------|-----------|
| Stethoscope                     | PHC-E-126 |
| Tape measure: soft, retractable | PHC-E-230 |
| Torch                           | PHC-E-121 |
| Toys: multisensory              | PHC-E-231 |
| Transfer board                  | PHC-E-232 |
| Walking frame: adult            | PHC-E-233 |
| Walking frame: paediatric       | PHC-E-126 |
| Walking stick: adult            | PHC-E-230 |
| Walking stick: paediatric       | PHC-E-234 |
| Wedges: set                     | PHC-E-235 |
| Weights: ankle and wrist        | PHC-E-236 |
| Wheelchair: 25 x30cm            | PHC-E-237 |
| Wheelchair: 30x30 cm            | PHC-E-238 |
| Wheelchair: 30x40cm             | PHC-E-239 |
| Wheelchair: 36x40cm             | PHC-E-240 |
| Wheelchair: 41cm wide           | PHC-E-241 |
| Wheelchair: 46cm wide           | PHC-E-242 |
| Wheelchair: 51cm wide           | PHC-E-243 |
| <b>Equipment – General</b>      |           |
| Allen key set                   | PHC-E-194 |
| Clamps: adjustable (pair)       | PHC-E-195 |
| Claw hammer                     | PHC-E-072 |
| Cordless Drill                  | PHC-E-196 |
| Drill bit set                   | PHC-E-197 |
| Electric foam cutter            | PHC-E-198 |
| Electric frying pan             | PHC-E-199 |
| Electric jigsaw                 | PHC-E-202 |

|                                |                 |
|--------------------------------|-----------------|
| Extension lead (on reel)       | PHC-E-211       |
| Eyelet punch                   | PHC-E-206       |
| Hacksaw                        | PHC-E-081       |
| Hacksaw blades                 | PHC-E-082       |
| Heat gun                       | PHC-E-201       |
| Measuring rule: folding        | PHC-E-204       |
| Multi-plug                     | PHC-E-210       |
| Pliers set                     | PHC-E-077       |
| Revolving punch                | PHC-E-205       |
| Screwdriver set                | PHC-E-073       |
| Shifting spanner               | PHC-E-074       |
| Spanner set (swivel-head)      | PHC-E-075       |
| Tape measure (industrial)      | PHC-E-207       |
| Tool box                       | PHC-E-157       |
| Utility knife                  | PHC-E-208       |
| Workbench, portable            | PHC-E-209       |
| <b>Instruments</b>             |                 |
| Scissors: splinting            | PHC-I-102       |
| Scissors: standard, adult      | PHC-I-100       |
| Scissors: standard, child      | PHC-I-101       |
| <b>SPEECH THERAPY</b>          |                 |
| <b>Equipment – Clinical</b>    |                 |
| Audiometer portable            | PHC-E-247       |
| Cards – themed, speech therapy | PHC-E-248 - 253 |
| HiPro box                      | PHC-E-254       |
| Noisemakers                    | PHC-E-255       |
| OAE/AABR screener portable     | PHC-E-256       |



|                                      |           |
|--------------------------------------|-----------|
| Otolight                             | PHC-E-257 |
| Otoscope, portable                   | PHC-E-258 |
| Portable screening tympanometer      | PHC-E-259 |
| <b>Instruments</b>                   |           |
| Cerumen management kit               | PHC-I-103 |
| cup: ear                             | PHC-I-104 |
| Curette: cerumen, plastic, adult     | PHC-I-105 |
| Curette: cerumen, plastic, paed      | PHC-I-106 |
| Curette, cerumen, lighted, magnified | PHC-I-107 |
| Ear loop, Bileau, small              | PHC-I-108 |
| Forceps, crocodile                   | PHC-I-109 |
| Syringe, impression                  | PHC-I-110 |

## CHECKLIST FOR ELEMENT: FURNITURE IS AVAILABLE AND INTACT AT THE ORAL HEALTH SERVICES

Use the checklist below to check whether facility service areas are equipped with sufficient functional furniture in the Oral Health services

| Item                                                 |                   |
|------------------------------------------------------|-------------------|
| <b>Waiting areas</b>                                 |                   |
| <b>Seating</b>                                       |                   |
| Adequate seating for all patients                    | PHC-F-015,016,017 |
| Chairs / benches intact                              |                   |
| Notice boards available                              | PHC-E-102,103     |
| <b>Treatment area</b>                                |                   |
| <b>Desk</b>                                          |                   |
| Available                                            | PHC-F-007         |
| Intact (including the drawers)                       |                   |
| <b>2x Anaesthetist stool (round stool on wheels)</b> |                   |
| Available                                            | PHC-F-065,066     |
| Intact                                               |                   |
| <b>Fridge</b>                                        |                   |
| Available                                            | PHC-F-022, 043    |
| Functional                                           |                   |

## CHECKLIST FOR ELEMENT: ESSENTIAL EQUIPMENT IS AVAILABLE AND FUNCTIONAL AT THE ORAL HEALTH SERVICES

**Use the checklist below to check whether essential equipment is available and functional at the Oral Health services**

| Item                                                            | Quantity |                                          |
|-----------------------------------------------------------------|----------|------------------------------------------|
| <b>Equipment</b>                                                |          |                                          |
| Amalgam separator                                               | 1        | PHC-E-164                                |
| Amalgamator: digital                                            | 1        | PHC-E-166                                |
| Autoclave: cassette-type, desktop                               | 1        | PHC-E-167                                |
| Compressor, 2-4 surgeries, fixed                                | 1        | PHC-E-168                                |
| Cuspidor/spittoon/water unit                                    | 1        | PHC-E-169                                |
| Dental chair: basic                                             | 1        | PHC-E-172                                |
| Dental chair: portable with portable light (for outreach)       | 1        | PHC-E-173                                |
| Dental delivery system with hand-pieces (fixed)                 | 1        | PHC-E-171                                |
| Dental delivery system with hand-pieces (Mobile – for outreach) | 1        | PHC-E-170                                |
| Dental light: LED                                               | 1        | PHC-E-184                                |
| Dental curing light (corded or cordless)                        | 1        | PHC-E-174, 175                           |
| Dental scaler: air                                              | 1        | PHC-E-185                                |
| Stool: dentist                                                  | 1        | PHC-F-065                                |
| Stool: dental assistant                                         | 1        | PHC-F-066                                |
| Suction: central, wet (commonest type)                          | 1        | PHC-E-188                                |
| Suction: central, dry (optional in water-scarce areas)          | 1        | PHC-E-186                                |
| Suction: dry, mobile (for outreach and back-up)                 | 1        | PHC-E-187                                |
| Trolley: emergency (fully equipped)                             | 1        | PHC-F-040 and Check-list for Element 166 |
| Ultrasonic cleaner                                              | 1        | PHC-E-189                                |
| Water distillation                                              | 1        | PHC-E-191                                |
| X-ray Aprons                                                    | 2        | PHC-E-181, 182                           |
| X-ray: wall-mounted                                             | 1        | PHC-E-192                                |
| X-ray: digital oral imaging plate with computer and cabling.    | 1        | PHC-E-193                                |

| Hand-pieces                                                |   |           |
|------------------------------------------------------------|---|-----------|
| 3-in-one syringe (included in dental delivery system)      | 1 | PHC-E-164 |
| Air motor (high-speed turbine)                             | 1 | PHC-E-176 |
| Contra-angle handpiece                                     | 1 | PHC-E-179 |
| Slow handpiece                                             | 1 | PHC-E-180 |
| Slow handpiece motor                                       | 1 | PHC-E-177 |
| Straight handpiece                                         | 1 | PHC-E-178 |
| Dental elevators                                           |   |           |
| Cryers elevator left                                       | 4 | PHC-I-050 |
| Cryers elevator right                                      | 4 | PHC-I-049 |
| Straight elevator Large                                    | 4 | PHC-I-047 |
| Straight elevator Medium                                   | 4 | PHC-I-048 |
| Straight elevator Small                                    | 4 | PHC-I-046 |
| Warwick-James elevator left                                | 2 | PHC-I-052 |
| Warwick-James elevator right                               | 2 | PHC-I-113 |
| Warwick-James elevator straight                            | 2 | PHC-I-051 |
| Dental extraction forceps                                  |   |           |
| Forceps: tooth extracting Lower bicuspid                   | 6 | PHC-I-059 |
| Forceps: tooth extracting Lower molars                     | 6 | PHC-I-060 |
| Forceps: tooth extracting Lower roots and crowded incisors | 2 | PHC-I-061 |
| Forceps: tooth extracting upper Anteriors and canines      | 6 | PHC-I-062 |
| Forceps: tooth extracting Upper bicuspid and roots         | 6 | PHC-I-063 |
| Forceps: tooth extracting Upper molars left                | 6 | PHC-I-064 |
| Forceps: tooth extracting Upper Molars right 90            | 6 | PHC-I-065 |
| Forceps: tooth extracting Upper Molars right 89            | 6 | PHC-I-066 |
| Forceps: tooth extracting Upper roots 29                   | 2 | PHC-I-067 |
| Forceps: tooth extracting Upper roots 44 N                 | 2 | PHC-I-069 |
| Forceps: tooth extracting Upper roots 29 S                 | 2 | PHC-I-068 |
| Forceps: tooth extracting Upper roots 76                   | 2 | PHC-I-070 |
| Forceps: tooth extracting Upper roots small                | 2 | PHC-I-071 |
| Forceps: tooth extracting Lower molars, child              | 6 | PHC-I-072 |

|                                                                |    |                |
|----------------------------------------------------------------|----|----------------|
| Forceps: tooth extracting Lower teeth and roots, child         | 6  | PHC-I-073      |
| Forceps: tooth extracting Lower canines Adult                  | 6  | PHC-I-114      |
| Forceps: tooth extracting Lower Anteriors Adult                | 6  | PHC-I-115      |
| Forceps: tooth extracting Upper incisors and canines, child    | 6  | PHC-I-059      |
| Forceps: tooth extracting Upper Molars, child                  | 6  | PHC-I-075      |
| Forceps: tooth extracting Upper teeth and roots, Molars, child | 6  | PHC-I-076      |
| <b>Conservative Instruments</b>                                |    |                |
| Amalgam carrier plastic right angle                            | 3  | PHC-I-034      |
| Amalgam carrier plastic straight                               | 2  | PHC-I-033      |
| Amalgam carver                                                 | 6  | PHC-I-040      |
| Amalgam plugger                                                | 4  | PHC-I-035, 036 |
| Ball burnisher 2.5-3.0mm                                       | 6  | PHC-I-037, 038 |
| Bib holders                                                    | 2  | PHC-I-081      |
| Bur Blocks                                                     | 2  | PHC-I-039      |
| Bur brushes                                                    | 2  | PHC-I-111      |
| Cement spatula                                                 | 2  | PHC-I-094      |
| Cotton and Dressing Tweezers                                   | 20 | PHC-I-098, 099 |
| Cotton pellet holder                                           | 2  | PHC-I-082      |
| Cotton wool holder (small bowl)                                | 2  | PHC-I-012      |
| Dappen dishes                                                  | 6  | PHC-I-042      |
| Dental Explorers/Probes Straight                               | 30 | PHC-I-043, 044 |
| Dental syringe Aspirating                                      | 30 | PHC-I-095      |
| Excavator 125/126                                              | 4  | PHC-I-055      |
| Excavator 129/130                                              | 4  | PHC-I-053      |
| Excavator 133/134                                              | 4  | PHC-I-054      |
| Flat plastic                                                   | 6  | PHC-I-056, 057 |
| Handle Mouth Mirror                                            | 30 | PHC-I-085      |
| Kidney dishes large                                            | 4  | PHC-I-013      |
| Kidney dishes small                                            | 4  | PHC-I-032      |
| Matrix retainer Siqueland Narrow                               | 4  | PHC-I-083      |

|                                         |    |                     |
|-----------------------------------------|----|---------------------|
| Matrix retainer Siqueland Wide          | 4  | PHC-I-084           |
| Mouth Mirrors to it Handle Mouth Mirror | 30 | PHC-I-086           |
| Needle holder                           | 2  | PHC-I-087           |
| Waste receiver                          | 2  | PHC-E-002, 005      |
| Periodontal                             |    |                     |
| Dental probe: periodontal               | 4  | PHC-I-045           |
| Periodontal hoe SG 5F                   | 6  | PHC-I-116           |
| Scaler, dental: H6/7                    | 6  | PHC-I-117           |
| Other                                   |    |                     |
| Artery forceps                          | 2  | PHC-I-003, 004      |
| Handle scalpel                          | 2  | PHC-I-007           |
| Mouth gag                               | 4  | PHC-I-078, 079, 080 |
| Needle holder                           | 2  | PHC-I-087           |
| Protective glasses                      | 4  | PHC-C079            |
| Rongeur : dental No.4                   | 4  | PHC-I-088           |
| Rongeur: dental No. 5S                  | 4  | PHC-I-089           |
| Scissors ligature                       | 2  | PHC-I-093           |
| Slab: mixing, glass                     | 2  | PHC-I-090           |
| Tongue forceps                          | 2  | PHC-I-058           |
| Trimmer: gingival margin U3/U4          | 4  | PHC-I-097           |
| Trimmer: gingival margin Ui/U2          | 4  | PHC-I-096           |
| Wax carver                              | 2  | PHC-I-041           |
| Wire ligature forceps                   | 2  | PHC-I-077           |

## CHECKLIST FOR ELEMENT: FURNITURE IS AVAILABLE AND INTACT AT THE 24 HOUR EMERGENCY UNIT

Use the checklist below to check whether facility service areas are equipped with sufficient functional furniture in the 24 Hour Emergency Unit

| Item                                         |                   |
|----------------------------------------------|-------------------|
| <b>Waiting areas</b>                         |                   |
| Notice boards available                      | PHC-E-102,103     |
| <b>Seating</b>                               |                   |
| a. Adequate seating for family/friends       | PHC-F-015,016,017 |
| b. Chairs / benches intact                   |                   |
| <b>Reception/nurses station</b>              |                   |
| <b>Desk</b>                                  |                   |
| a. Available                                 | PHC-F-007         |
| b. Intact (including the drawers)            |                   |
| <b>Chair</b>                                 |                   |
| a. Available                                 | PHC-F-002         |
| b. Intact                                    |                   |
| <b>Clinical areas</b>                        |                   |
| <b>1 x Chair per patient</b>                 |                   |
| a. Available                                 | PHC-F-005         |
| b. Intact                                    |                   |
| <b>Hospital beds</b>                         |                   |
| a. Available according approved bed capacity | PHC-F-072         |
| b. Intact (check ALL)                        |                   |
| <b>Bedside footstool</b>                     |                   |
| a. Available                                 | PHC-F-031         |
| b. Intact                                    |                   |

|                                             |  |               |
|---------------------------------------------|--|---------------|
| <b>Bedside locker</b>                       |  | PHC-F-071     |
| a. Available                                |  |               |
| b. Intact                                   |  |               |
| <b>Lockable Scheduled Medicine cupboard</b> |  | PHC-F-070     |
| a. Available                                |  |               |
| b. Intact                                   |  |               |
| <b>Dressing trolley</b>                     |  | PHC-F-039     |
| a. Available (1 per area)                   |  |               |
| b. Intact (including the drawers)           |  |               |
| <b>Non-clinical area</b>                    |  | PHC-F-043,047 |
| <b>Dirty utility/sluite area</b>            |  |               |
| a. Slop-hopper                              |  |               |
| b. In working order                         |  |               |
| <b>Medicine storeroom/cupboard/trolley</b>  |  |               |
| a. Medicine fridge                          |  |               |
| b. In working order                         |  |               |



## CHECKLIST FOR ELEMENT: ESSENTIAL EQUIPMENT IS AVAILABLE AND FUNCTIONAL AT THE 24 HOUR EMERGENCY UNIT

Use the checklist below to check whether essential equipment is available and functional in the resuscitation, consultation and observation areas in the 24 Hour Emergency Unit

| Item                                                                    |                   |
|-------------------------------------------------------------------------|-------------------|
| <b>CONSULTATION ROOMS</b>                                               |                   |
| Stethoscope                                                             | PHC-E-126         |
| Non-invasive Baumanometer (wall mounted/ portable)                      | PHC-E-115,116     |
| Adult, paediatric and large cuffs (3) for Baumanometer                  | PHC-E-115,116     |
| Diagnostic sets including ophthalmic pieces (wall mounted or portable ) | PHC-E-117,118,119 |
| Patella hammer                                                          | PHC-E-120         |
| Tuning fork (only required in one consultation room)                    | PHC-E-132         |
| Tape measure                                                            | PHC-E-113         |
| Clinical thermometers                                                   | PHC-E-130,131     |
| Blood glucometer                                                        | PHC-E-149         |
| Peak flow meter                                                         | PHC-E-267         |
| Adult clinical scale up to 150 kg                                       | PHC-E-122,123     |
| HB meter                                                                | PHC-E-152         |
| Height measure                                                          | PHC-E-125         |
| Urine specimen jars                                                     | PHC-E-150,158     |
| Baby scale                                                              | PHC-E-124         |
| Bassinet                                                                | PHC-E-025         |
| Wall mounted or portable angle poise examination lamp                   | PHC-E-110, 154    |
| Ceiling mounted light                                                   | PHC-E-111         |

**CHECKLIST FOR ELEMENT: THERE IS A STERILE PACK FOR MINOR SURGERY**

Use the checklist below to check whether equipment for minor surgery is available

| Item                                                                                                                            | Quantity |           |
|---------------------------------------------------------------------------------------------------------------------------------|----------|-----------|
| <b>MINOR STITCH / SUTURING TRAY</b>                                                                                             |          |           |
| Small stitch tray                                                                                                               | 1        | PHC-I-010 |
| Stitch scissor                                                                                                                  | 1        | PHC-I-009 |
| Toothed forceps                                                                                                                 | 1        | PHC-I-001 |
| Non-toothed forceps                                                                                                             | 1        | PHC-I-002 |
| Bard-Parker surgical blade handle to fit accompanying blades (blades do not form part of sterilised pack but must be available) | 1        | PHC-I-007 |
| Mosquito, straight                                                                                                              | 2        | PHC-I-005 |
| Mosquito, curved                                                                                                                | 2        | PHC-I-006 |
| Artery forceps, straight                                                                                                        | 2        | PHC-I-003 |
| Artery forceps, curved                                                                                                          | 2        | PHC-I-004 |
| Needle holder                                                                                                                   | 1        | PHC-I-008 |
| Swab holder                                                                                                                     | 1        | PHC-I-011 |

## CHECKLIST FOR ELEMENT: RESUSCITATION ROOM IS EQUIPPED WITH FUNCTIONAL BASIC FURNITURE AND RESUSCITATION EQUIPMENT (24 HOUR EMERGENCY UNIT)

**Use the checklist below to check whether the emergency/resuscitation room complies with standards for functional basic equipment**

| Item                                                                                    |                     |
|-----------------------------------------------------------------------------------------|---------------------|
| Emergency trolley with lockable medicine drawer and accessories                         | PHC-F-040           |
| Examination bed                                                                         | PHC-F-029,030       |
| Wall or ceiling mounted angle-poise-style examination lamp                              | PHC-E-110,111       |
| Nebuliser OR face mask with nebuliser chamber for adult and paediatric                  | PHC-E-137           |
| Functional electric powered OR manual suction devices and suction catheters             | PHC-E-144, 146      |
| Kick about with bucket                                                                  | PHC-F-032, 033      |
| Anaesthetist stool (round stool on wheels)                                              | PHC-F-034           |
| Drip stand                                                                              | PHC-F-028           |
| Dressing trolley                                                                        | PHC-F-037, 038, 039 |
| Cardiac arrest board                                                                    | PHC-E-134           |
| Bin (general waste )                                                                    | PHC-E-003           |
| Suture material                                                                         | PHC-C-180, 181, 182 |
| Thermal (space) blanket                                                                 | PHC-C-179           |
| Gloves exam n/sterile gloves: small, medium and large at least one pair of each size    | PHC-C-141, 142, 143 |
| Gloves surgical sterile latex: 6 OR 6.5, 7 OR 7.5 and 8, at least one pair of each size | PHC-C-138, 139, 140 |
| Protective face shields OR Goggles with face mask                                       | PHC-C-080, 079      |
| Disposable plastic aprons                                                               | PHC-C-137           |
| Disposable non-sterile face masks                                                       | PHC-C-077           |
| Resuscitation algorithms                                                                |                     |
| Resuscitation documentation register                                                    |                     |
| Wall mounted liquid hand soap dispenser/hand sanitizer                                  | PHC-E-014           |
| Wall-mounted hand paper dispenser                                                       | PHC-E-020, 021      |

## CHECKLIST FOR ELEMENT: RESTORE THE EMERGENCY TROLLEY IN THE 24 HOUR EMERGENCY UNIT AFTER EACH USAGE

Use the checklist below to check whether the emergency trolley is sufficiently stocked with unexpired medication

| Item                                                 |               |
|------------------------------------------------------|---------------|
| Laryngoscope handle with functional batteries        | PHC-E-135     |
| Adult curved blades for laryngoscope size 2          | PHC-E-135     |
| Adult curved blades for laryngoscope size 3          | PHC-E-135     |
| Adult curved blades for laryngoscope size 4          | PHC-E-135     |
| Paediatric straight blades for laryngoscope sizes 00 | PHC-E-135     |
| Paediatric straight blades for laryngoscope sizes 0  | PHC-E-135     |
| Paediatric straight blades for laryngoscope sizes 1  | PHC-E-135     |
| Spare bulbs for laryngoscope                         | PHC-E-135     |
| Spare batteries for laryngoscope sizes               |               |
| Endotracheal tubes - uncuffed size 2.0mm OR 2.5mm    | PHC-C-086,354 |
| Endotracheal tubes - uncuffed size 3.0mm OR 3.5mm    | PHC-C-087,355 |
| Endotracheal tubes - uncuffed size 4.0mm OR 4.5mm    | PHC-C-088,356 |
| Endotracheal tubes - uncuffed size 5.0mm OR 5.5mm    |               |
| Endotracheal tubes - cuffed size 3.0mm               | PHC-C-357     |
| Endotracheal tubes - cuffed size 4.0mm               | PHC-C-358     |
| Endotracheal tubes - cuffed size 5.0mm               | PHC-C-089     |
| Endotracheal tubes - cuffed size 6.0mm               | PHC-C-090     |
| Endotracheal tubes - cuffed size 7.0mm               | PHC-C-091     |
| Endotracheal tubes - cuffed size 8.0mm               | PHC-C-092     |
| Water-soluble lubricant/lubricating jelly            | PHC-C-172     |
| Tape to hold tie endotracheal tube in place          |               |
| Patella hammer                                       | PHC-E-120     |
| Oropharyngeal airways (Guedel) size 0                | PHC-C-113     |
| Oropharyngeal airways (Guedel) size 1                | PHC-C-114     |

|                                                                                                                         |                   |
|-------------------------------------------------------------------------------------------------------------------------|-------------------|
| Oropharyngeal airways (Guedel) size 2                                                                                   | PHC-C-115         |
| Oropharyngeal airways (Guedel) size 3                                                                                   | PHC-C-116         |
| Oropharyngeal airways (Guedel) size 4                                                                                   | PHC-C-117         |
| Oropharyngeal airways (Guedel) size 5                                                                                   | PHC-C-350         |
| Adult-size introducer, intubating stylet or bougie for endotracheal tubes                                               | PHC-I-125         |
| Paediatricsize introducer, intubating stylet or bougie for endotracheal tubes                                           | PHC-I-126         |
| Magill's forceps for adults                                                                                             | PHC-I-123         |
| Magill's forceps for paediatric                                                                                         | PHC-I-124         |
| Laryngeal masks (supraglottic airways) size 2                                                                           | PHC-C-351         |
| Laryngeal masks (supraglottic airways) size 2.5                                                                         | PHC-C-352         |
| Laryngeal masks (supraglottic airways) size 3                                                                           | PHC-C-353         |
| Laryngeal masks (supraglottic airways) size 4                                                                           | PHC-C-103         |
| Manual bag valve mask/ manual resuscitator OR self-inflating bag with compatible masks for adults                       | PHC-E-142,143     |
| Manual bag valve mask/ manual resuscitator OR self-inflating bag with compatible masks for paediatric                   | PHC-E-140,141     |
| Simple face mask OR reservoir mask OR nasal cannula (prongs) for oxygen, adults                                         | PHC-E-111,108,106 |
| Simple face mask OR reservoir mask OR nasal cannula (prongs) for oxygen, paediatric                                     | PHC-E-110,107,105 |
| Face mask for nebuliser OR face mask with nebuliser chamber for adult OR spacers for MDIs (adults and paediatrics)      | PHC-E-108         |
| Face mask for nebuliser OR face mask with nebuliser chamber for paediatric OR spacers for MDIs (adults and paediatrics) | PHC-E-107         |
| Intravenous cannula 18g green and appropriate strapping                                                                 | PHC-C-101,097     |
| Intravenous cannula 20g pink and appropriate strapping                                                                  | PHC-C-101,098     |
| Intravenous cannula 22g blue and appropriate strapping                                                                  | PHC-C-101,099     |
| Intravenous cannula 24g yellow and appropriate strapping                                                                | PHC-C-101,100     |
| Syringes 3-part: 2ml                                                                                                    | PHC-C-118         |
| Syringes 3-part: 5ml                                                                                                    | PHC-C-119         |
| Syringes 3-part: 10ml OR 20ml                                                                                           | PHC-C-120,349     |
| Syringes: insulin syringes                                                                                              | PHC-C-121         |
| Needles: 18 (pink) OR 20 (yellow)                                                                                       | PHC-C-122,123     |
| Needles: 21 (green)                                                                                                     | PHC-C-124         |

|                                                                                                               |                   |
|---------------------------------------------------------------------------------------------------------------|-------------------|
| Needles: 23 (blue) OR 22 (black)                                                                              | PHC-C-125,126     |
| Sharps container                                                                                              | PHC-E-005         |
| Admin set 20 drops/ml 1.8m /pack                                                                              | PHC-C-095         |
| Admin set paed 60 drops/ml 1.8m /pack                                                                         | PHC-C-096         |
| Automatic External Defibrillator (AED) OR ECG monitor and defibrillator                                       | PHC-E-133         |
| Stethoscope                                                                                                   | PHC-E-126         |
| Haemoglobin meter                                                                                             | PHC-E-152         |
| Blood glucometer with testing strips and spare batteries                                                      | PHC-E-149         |
| Diagnostic set and batteries including ophthalmic pieces (wall mounted or portable )                          | PHC-E-117,118,119 |
| Rescue scissors (to cut clothing)                                                                             | PHC-I-020         |
| Paediatric Broselow tape OR Pawper tape                                                                       | PHC-E-128, 129    |
| Wound care (gauze, bandages, cotton wools, plasters, alcohol swabs and antiseptic solutions)                  | PHC-C-147 onwards |
| Urinary (Foley's) catheter silicone/latex 8f                                                                  | PHC-C-343         |
| Urinary (Foley's) catheter silicone/latex 10f                                                                 | PHC-C-345         |
| Urinary (Foley's) catheter silicone/latex 12f                                                                 | PHC-C-345         |
| Urinary (Foley's) catheters: 14f                                                                              | PHC-C-127         |
| Urinary (Foley's) catheter silicone/latex 16f                                                                 | PHC-C-346         |
| Urinary (Foley's) catheters: 18f                                                                              | PHC-C-128         |
| Urinary (Foley's) catheter silicone/latex 20f                                                                 | PHC-C-347         |
| Urinary (Foley's) catheter silicone/latex 22f                                                                 | PHC-C-348         |
| Urinary bag specified in the surgical supply list                                                             | PHC-C-129         |
| Nasogastric tubes: 600mmfg8                                                                                   | PHC-C-130         |
| Nasogastric tubes: 1000mmfg10 or 12                                                                           | PHC-C-131, 132    |
| Medication/vaculitre stickers                                                                                 |                   |
| <b>Present individually or in combined multifunctional diagnostic monitoring set</b>                          |                   |
| Pulse oximeter with adult & paediatric probes                                                                 | PHC-E-139         |
| Non invasive electronic blood pressure monitoring device including paediatric, adult & large adult cuff sizes | PHC-E-136, 116    |
| Clinical thermometer (in °C, non-mercury)                                                                     | PHC-E-130, 131    |

| <b>Emergency medicines (also check expiry dates)</b>                                              |
|---------------------------------------------------------------------------------------------------|
| Activated Charcoal                                                                                |
| Adrenaline injection 1mg/ml (Epinephrine)                                                         |
| Amlodipine 5mg OR 10mg tablets                                                                    |
| Aspirin tablets                                                                                   |
| Atropine 0.5mg OR 1mg injection                                                                   |
| Benzodiazepine e.g. diazepam injection 5mg/ml injection                                           |
| Calcium gluconate 10% injection                                                                   |
| Furosemide 20mg ampoule                                                                           |
| Hydrocortisone 100mg/ml injection                                                                 |
| Insulin, short acting (stored in the medicine fridge)                                             |
| Ipratropium 0.25mg/2ml OR 0.5mg/2ml unit dose vial for nebulisation OR 40 mcg MDIs                |
| Isosorbide dinitrate, sublingual, 5mg tablets                                                     |
| Lidocaine/Lignocaine IV 1% OR 2%                                                                  |
| Magnesium sulphate 50%, 1g/2ml ampoule (minimum of 14 ampoules required for one treatment course) |
| Midazolam (1mg/ml OR 5mg/ml) OR Diazepam 5mg/ml                                                   |
| Nifedipine 10mg capsules                                                                          |
| Prednisone 5 mg tablets                                                                           |
| Promethazine 25mg ampoule                                                                         |
| Short-acting sublingual nitrates e.g. glyceryl trinitrate SL OR isosorbide dinitrate              |
| Salbutamol nebulising solution OR nebulisers OR MDI                                               |
| Thiamine 100mg injection                                                                          |
| Water for injection                                                                               |
| <b>IV Solutions</b>                                                                               |
| 50% dextrose (20ml ampoule or 50ml bag) OR 10% dextrose solution                                  |
| Pediatric solutions e.g. ½ strength Darrows solution AND neonatalyte solution                     |
| Sodium Chloride 0.9%                                                                              |

## CHECKLIST FOR ELEMENT: FURNITURE IS AVAILABLE AND INTACT IN THE MATERNITY OBSTETRIC UNIT

Use the checklist below to check whether facility service areas are equipped with sufficient functional furniture in the MOU

| Item                                         |                     |
|----------------------------------------------|---------------------|
| <b>Waiting areas</b>                         |                     |
| Notice boards available                      | PHC-E-102,103       |
| <b>Seating</b>                               |                     |
| a. Adequate seating for family/friends       | PHC-F-015,016,017   |
| b. Chairs / benches intact                   |                     |
| <b>Reception/nurses station</b>              |                     |
| <b>Desk</b>                                  |                     |
| a. Available                                 | PHC-F-007           |
| b. Intact (including the drawers)            |                     |
| <b>Chair</b>                                 |                     |
| a. Available                                 | PHC-F-002           |
| b. Intact                                    |                     |
| <b>Service area</b>                          |                     |
| <b>1 x Chair per patient</b>                 |                     |
| a. Available                                 | PHC-F-005           |
| b. Intact                                    |                     |
| <b>Anaesthetist stool</b>                    |                     |
| a. Available                                 | PHC-F-034           |
| b. Intact                                    |                     |
| <b>Hospital beds</b>                         |                     |
| a. Available according approved bed capacity | PHC-F-072, 073, 074 |
| b. Intact (check ALL)                        |                     |



|                                             |               |
|---------------------------------------------|---------------|
| <b>Over-bed patient trolley</b>             |               |
| a. Available                                | PHC-F-075     |
| b. Intact                                   |               |
| <b>Obstetric tilting couch</b>              |               |
| a. Available                                | PHC-F-029     |
| b. Intact                                   |               |
| <b>Bedside footstool</b>                    |               |
| a. Available                                | PHC-F-031     |
| b. Intact                                   |               |
| <b>Bedside locker</b>                       |               |
| a. Available                                | PHC-F-071     |
| b. Intact                                   |               |
| <b>Lockable Scheduled Medicine cupboard</b> |               |
| a. Available                                | PHC-F-070     |
| b. Intact                                   |               |
| <b>Dressing trolley</b>                     |               |
| a. Available (1 per ward)                   | PHC-F-039     |
| b. Intact (including the drawers)           |               |
| <b>Double bowl stand with two bowls</b>     |               |
| a. Available                                | PHC-F-044     |
| b. Intact                                   |               |
| <b>Non-clinical area</b>                    |               |
| <b>Dirty utility/sluice area</b>            |               |
| a. Freezer (for placenta)                   | PHC-F-076     |
| b. In working order                         |               |
| <b>Medicine storeroom/cupboard/trolley</b>  |               |
| a. Medicine fridge                          | PHC-F-043,047 |
| b. In working order                         |               |

## CHECKLIST FOR ELEMENT: ESSENTIAL EQUIPMENT IN THE MATERNITY OBSTETRIC UNIT

Use the checklist below to check whether essential equipment is available and functional in the Maternity Obstetric Unit

| Item                                                                    |                     |
|-------------------------------------------------------------------------|---------------------|
| Stethoscope                                                             | PHC-E-126           |
| Foetal Stethoscope Plastic                                              | PHC-E-264           |
| Non-invasive Baumanometer (wall mounted/ portable)                      | PHC-E-115,116       |
| Adult, paediatrics and large cuffs (3) for Baumanometer                 | PHC-E-115,116       |
| Diagnostic sets -including ophthalmic pieces(wall mounted or portable ) | PHC-E-117,118,119   |
| Peak flow meter                                                         | PHC-E-267           |
| Patella hammer                                                          | PHC-E-120           |
| Tape measure                                                            | PHC-E-113           |
| Clinical thermometers                                                   | PHC-E-130,131       |
| Ceiling mounted or portable - examination lamp                          | PHC-E-111, 154      |
| Adult clinical scale upto 150 kg                                        | PHC-E-122,123       |
| Baby scale                                                              | PHC-E-124           |
| Bassinet with trolley and mattress                                      | PHC-E-025           |
| Blood glucometer                                                        | PHC-E-149           |
| HB meter                                                                | PHC-E-152           |
| Height measure                                                          | PHC-E-125           |
| Urine specimen jars                                                     | PHC-E-150,158       |
| CTG Machine (cardiotocographic)                                         | PHC-E-265           |
| Incubator Transport                                                     |                     |
| Infant Warmer: radiant                                                  | PHC-E-190, 260, 261 |
| Suction Unit Mobile Electrical 2x 2lit Bottle                           | PHC-E-144           |
| Bowl Lotion S/Steel 150mm                                               | PHC-I-012           |
| Rescue scissors                                                         | PHC-I-020           |
| Autoclave Stand alone (mobile) Approx 100 lit                           | PHC-E-157           |
| Bed Pan washer                                                          |                     |
| Tray Instruments washing with lid 183mm x 140 x 17 mm                   | PHC-E-157           |

## CHECKLIST FOR ELEMENT: STERILE OBSTETRIC DELIVERY PACKS ARE AVAILABLE IN THE MOU

Use the checklist below to check whether there are emergency  
sterile obstetric packs available

| Item                                        | Quantity |           |
|---------------------------------------------|----------|-----------|
| <b>NON-NEGOTIABLE</b>                       |          |           |
| Stitch scissor                              | 1        | PHC-I-009 |
| Episiotomy scissor                          | 1        | PHC-I-019 |
| Cord scissor                                | 1        | PHC-I-018 |
| Dissecting forceps non-toothed (plain)      | 1        | PHC-I-002 |
| Dissecting forceps toothed                  | 1        | PHC-I-001 |
| Artery forceps, straight, long              | 2        | PHC-I-003 |
| Needle holder                               | 1        | PHC-I-008 |
| Small bowl                                  | 2        | PHC-I-012 |
| Kidney dishes OR receivers (big)            | 2        | PHC-I-013 |
| <b>EXTRAS (not part of sterilised pack)</b> |          |           |
| Basin                                       | 1        | PHC-I-021 |
| Stainless-steel round bowl, large           | 1        | PHC-I-022 |
| Green towels                                | 4        |           |
| Disposable apron                            | 2        | PHC-C-137 |
| Gauzes                                      | 5        | PHC-C-150 |
| Vaginal tampons                             | 1        | PHC-C-158 |
| Sanitary towels                             | 2        | PHC-C-156 |
| Round cotton wool balls                     | 1 pack   | PHC-C-148 |
| Umbilical cord clamps                       | 2        | PHC-C-163 |

## CHECKLIST FOR ELEMENT: RESTORE THE EMERGENCY TROLLEY IN THE MOU DAILY OR AFTER EACH USAGE

Use the checklist below to check whether the emergency trolley is sufficiently stocked with unexpired medication in the MOU

| Item                                                 |               |
|------------------------------------------------------|---------------|
| Laryngoscope handle with functional batteries        | PHC-E-135     |
| Adult curved blades for laryngoscope size 2          | PHC-E-135     |
| Adult curved blades for laryngoscope size 3          | PHC-E-135     |
| Adult curved blades for laryngoscope size 4          | PHC-E-135     |
| Paediatric straight blades for laryngoscope sizes 00 | PHC-E-135     |
| Paediatric straight blades for laryngoscope sizes 0  | PHC-E-135     |
| Paediatric straight blades for laryngoscope sizes 1  | PHC-E-135     |
| Spare bulbs for laryngoscope                         | PHC-E-135     |
| Spare batteries for laryngoscope sizes               |               |
| Endotracheal tubes - uncuffed size 2.0mm OR 2.5mm    | PHC-C-086,354 |
| Endotracheal tubes - uncuffed size 3.0mm OR 3.5mm    | PHC-C-087,355 |
| Endotracheal tubes - uncuffed size 4.0mm OR 4.5mm    | PHC-C-088,356 |
| Endotracheal tubes - uncuffed size 5.0mm OR 5.5mm    |               |
| Endotracheal tubes - cuffed size 3.0mm               | PHC-C-357     |
| Endotracheal tubes - cuffed size 4.0mm               | PHC-C-358     |
| Endotracheal tubes - cuffed size 5.0mm               | PHC-C-089     |
| Endotracheal tubes - cuffed size 6.0mm               | PHC-C-090     |
| Endotracheal tubes - cuffed size 7.0mm               | PHC-C-091     |
| Endotracheal tubes - cuffed size 8.0mm               | PHC-C-092     |
| Water-soluble lubricant/lubricating jelly            | PHC-C-172     |
| Tape to hold tie endotracheal tube in place          |               |
| Patella hammer                                       | PHC-E-120     |
| Oropharyngeal airways (Guedel) size 0                | PHC-C-113     |
| Oropharyngeal airways (Guedel) size 1                | PHC-C-114     |

|                                                                                                                         |                   |
|-------------------------------------------------------------------------------------------------------------------------|-------------------|
| Oropharyngeal airways (Guedel) size 2                                                                                   | PHC-C-115         |
| Oropharyngeal airways (Guedel) size 3                                                                                   | PHC-C-116         |
| Oropharyngeal airways (Guedel) size 4                                                                                   | PHC-C-117         |
| Oropharyngeal airways (Guedel) size 5                                                                                   | PHC-C-350         |
| Adult-size introducer, intubating stylet or bougie for endotracheal tubes                                               | PHC-I-125         |
| Paediatric-size introducer, intubating stylet or bougie for endotracheal tubes                                          | PHC-I-126         |
| Magill's forceps for adults                                                                                             | PHC-I-123         |
| Magill's forceps for paediatric                                                                                         | PHC-I-124         |
| Laryngeal masks (supraglottic airways) size 2                                                                           | PHC-C-351         |
| Laryngeal masks (supraglottic airways) size 2.5                                                                         | PHC-C-352         |
| Laryngeal masks (supraglottic airways) size 3                                                                           | PHC-C-353         |
| Laryngeal masks (supraglottic airways) size 4                                                                           | PHC-C-103         |
| Manual bag valve mask/ manual resuscitator OR self-inflating bag with compatible masks for adults                       | PHC-E-142,143     |
| Manual bag valve mask/ manual resuscitator OR self-inflating bag with compatible masks for paediatric                   | PHC-E-140,141     |
| Simple face mask OR reservoir mask OR nasal cannula (prongs) for oxygen, adults                                         | PHC-E-111,108,106 |
| Simple face mask OR reservoir mask OR nasal cannula (prongs) for oxygen, paediatric                                     | PHC-E-110,107,105 |
| Face mask for nebuliser OR face mask with nebuliser chamber for adult OR spacers for MDIs (adults and paediatrics)      | PHC-E-108         |
| Face mask for nebuliser OR face mask with nebuliser chamber for paediatric OR spacers for MDIs (adults and paediatrics) | PHC-E-107         |
| Intravenous cannula 18g green and appropriate strapping                                                                 | PHC-C-101,097     |
| Intravenous cannula 20g pink and appropriate strapping                                                                  | PHC-C-101,098     |
| Intravenous cannula 22g blue and appropriate strapping                                                                  | PHC-C-101,099     |
| Intravenous cannula 24g yellow and appropriate strapping                                                                | PHC-C-101,100     |
| Syringes 3-part: 2ml                                                                                                    | PHC-C-118         |
| Syringes 3-part: 5ml                                                                                                    | PHC-C-119         |
| Syringes 3-part: 10ml OR 20ml                                                                                           | PHC-C-120,349     |
| Syringes: insulin syringes                                                                                              | PHC-C-121         |
| Needles: 18 (pink) OR 20 (yellow)                                                                                       | PHC-C-122,123     |
| Needles: 21 (green)                                                                                                     | PHC-C-124         |

|                                                                                                               |                   |
|---------------------------------------------------------------------------------------------------------------|-------------------|
| Needles: 23 (blue) OR 22 (black)                                                                              | PHC-C-125,126     |
| Sharps container                                                                                              | PHC-E-005         |
| Admin set 20 drops/ml 1.8m /pack                                                                              | PHC-C-095         |
| Admin set paed 60 drops/ml 1.8m /pack                                                                         | PHC-C-096         |
| Automatic External Defibrillator (AED) OR ECG monitor and defibrillator                                       | PHC-E-133         |
| Stethoscope                                                                                                   | PHC-E-126         |
| Haemoglobin meter                                                                                             | PHC-E-152         |
| Blood glucometer with testing strips and spare batteries                                                      | PHC-E-149         |
| Diagnostic set and batteries including ophthalmic pieces (wall mounted or portable )                          | PHC-E-117,118,119 |
| Rescue scissors (to cut clothing)                                                                             | PHC-I-020         |
| Paediatric Broselow tape OR Pawper tape                                                                       | PHC-E-128, 129    |
| Wound care (gauze, bandages, cotton wools, plasters, alcohol swabs and antiseptic solutions)                  | PHC-C-147 onwards |
| Urinary (Foley's) catheter silicone/latex 8f                                                                  | PHC-C-343         |
| Urinary (Foley's) catheter silicone/latex 10f                                                                 | PHC-C-345         |
| Urinary (Foley's) catheter silicone/latex 12f                                                                 | PHC-C-345         |
| Urinary (Foley's) catheters: 14f                                                                              | PHC-C-127         |
| Urinary (Foley's) catheter silicone/latex 16f                                                                 | PHC-C-346         |
| Urinary (Foley's) catheters: 18f                                                                              | PHC-C-128         |
| Urinary (Foley's) catheter silicone/latex 20f                                                                 | PHC-C-347         |
| Urinary (Foley's) catheter silicone/latex 22f                                                                 | PHC-C-348         |
| Urinary bag specified in the surgical supply list                                                             | PHC-C-129         |
| Nasogastric tubes: 600mmfg8                                                                                   | PHC-C-130         |
| Nasogastric tubes: 1000mmfg10 or 12                                                                           | PHC-C-131, 132    |
| Medication/vaculitre stickers                                                                                 |                   |
| <b>Present individually or in combined multifunctional diagnostic monitoring set</b>                          |                   |
| Pulse oximeter with adult & paediatric probes                                                                 | PHC-E-139         |
| Non invasive electronic blood pressure monitoring device including paediatric, adult & large adult cuff sizes | PHC-E-136, 116    |
| Clinical thermometer (in °C, non-mercury)                                                                     | PHC-E-130, 131    |

| <b>Emergency medicines (also check expiry dates)</b>                                              |
|---------------------------------------------------------------------------------------------------|
| Activated Charcoal                                                                                |
| Adrenaline injection 1mg/ml (Epinephrine)                                                         |
| Amlodipine 5mg OR 10mg tablets                                                                    |
| Aspirin tablets                                                                                   |
| Atropine 0.5mg OR 1mg injection                                                                   |
| Benzodiazepine e.g. diazepam injection 5mg/ml injection                                           |
| Calcium gluconate 10% injection                                                                   |
| Furosemide 20mg ampoule                                                                           |
| Hydrocortisone 100mg/ml injection                                                                 |
| Insulin, short acting (stored in the medicine fridge)                                             |
| Ipratropium 0.25mg/2ml OR 0.5mg/2ml unit dose vial for nebulisation OR 40 mcg MDIs                |
| Isosorbide dinitrate, sublingual, 5mg tablets                                                     |
| Lidocaine/Lignocaine IV 1% OR 2%                                                                  |
| Magnesium sulphate 50%, 1g/2ml ampoule (minimum of 14 ampoules required for one treatment course) |
| Midazolam (1mg/ml OR 5mg/ml) OR Diazepam 5mg/ml                                                   |
| Nifedipine 10mg capsules                                                                          |
| Prednisone 5 mg tablets                                                                           |
| Promethazine 25mg ampoule                                                                         |
| Short-acting sublingual nitrates e.g. glyceryl trinitrate SL OR isosorbide dinitrate              |
| Salbutamol nebulising solution OR nebules OR MDI                                                  |
| Thiamine 100mg injection                                                                          |
| Water for injection                                                                               |
| Oxytocin 5 OR 10IU/ml AND Ergometrine 0.5mg OR oxytocin/ergometrine 5U/0,5 mg (Combination)       |
| <b>IV Solutions</b>                                                                               |
| 50% dextrose (20ml ampoule or 50ml bag) OR 10% dextrose solution                                  |
| Pediatric solutions e.g. ½ strength Darrows solution AND neonatalyte solution                     |
| Sodium Chloride 0.9%                                                                              |

## CHECKLIST FOR ELEMENT: ESSENTIAL EQUIPMENT IS AVAILABLE AND FUNCTIONING IN THE TOP AND MMC PROCEDURE ROOM

Use the checklist below to check whether essential equipment is available and functional in the TOP and MMC procedure room

| Item                                                                         |                     |
|------------------------------------------------------------------------------|---------------------|
| Stethoscope                                                                  | PHC-E-126           |
| Non-invasive Baumanometer (wall mounted/ portable)                           | PHC-E-115, 116      |
| Adult and large cuffs (2) for Baumanometer                                   | PHC-E-115, 116      |
| Diagnostic sets -including ophthalmic pieces(wall mounted or portable)       | PHC-E-119, 119, 117 |
| Tape measure                                                                 | PHC-E-113           |
| Clinical thermometers                                                        | PHC-E-130, 131      |
| Blood glucometer                                                             | PHC-E-149           |
| Adult clinical scale up to 150 kg                                            | PHC-E-122, 123      |
| HB meter                                                                     | PHC-E-152           |
| Height measure                                                               | PHC-E-125           |
| Freezer for products of conception and foreskins                             | PHC-F-076           |
| Gynaecology examination couch with stirrups                                  | PHC-F-029           |
| Tilting examination couch                                                    | PHC-F-062           |
| Ceiling mounted, Wall mounted or portable angle poise style examination lamp | PHC-E-111, 110, 154 |



**CHECKLIST FOR ELEMENT: SHARPS ARE DISPOSED OF APPROPRIATELY**

Use the checklist below to check whether sharps are disposed of appropriately

| Item                                                                     |
|--------------------------------------------------------------------------|
| Waste is properly segregated                                             |
| Sharps are disposed of in impenetrable, tamperproof containers           |
| Sharps containers are disposed of when they reach the limit mark         |
| Sharps containers are placed on work surface or in wall mounted brackets |

PHC-E-005

**CHECKLIST FOR ELEMENT: TEMPERATURE OF THE MEDICINE ROOM/DISPENSARY IS MAINTAINED WITHIN THE SAFETY RANGE**

Use the checklist below to check whether the medicine in the medicine room/dispensary is maintained within the safety range

| Item                                                                  |           |
|-----------------------------------------------------------------------|-----------|
| There is at least one functional, wall-mounted room thermometer       | PHC-E-114 |
| The temperature of the pharmacy is recorded daily                     | PHC-C-134 |
| The temperature of the pharmacy is maintained within the safety range |           |

## CHECKLIST FOR ELEMENT: COLD CHAIN PROCEDURE FOR VACCINES IS MAINTAINED

**Use the checklist below to check whether the cold chain for vaccines is maintained**

| Item                                                                                                  |                                             |
|-------------------------------------------------------------------------------------------------------|---------------------------------------------|
| There is a standard operating procedure for the maintenance of cold chain for vaccines                |                                             |
| Facility has a vaccine or medicine refrigerator with a thermometer                                    | PHC-F-042, 043, 049, 050,<br>PHC-E-153, 042 |
| The temperature of the refrigerator is recorded twice daily, 7 hours apart (check one month's record) | PHC-C-135                                   |
| The temperature of the refrigerator is maintained between 2-8 °C (check one month's record)           |                                             |
| There is a cooler box for storage of vaccines if needed                                               | PHC-E-035                                   |
| Ice packs are available for use as needed                                                             | PHC-C-203                                   |

## CHECKLIST FOR ELEMENT: SPECIMENS ARE COLLECTED, PACKED, STORED AND PREPARED FOR TRANSPORTATION ACCORDING TO THE PRIMARY HEALTH CARE LABORATORY HANDBOOK

Use the checklist below to check whether specimens are handled according to the PHC Laboratory Handbook

### Grouping of specimens

| Group A                                               | Group B   | Group C                                    |
|-------------------------------------------------------|-----------|--------------------------------------------|
| Blood<br>Pleural effusion<br>Sputum<br>Stool<br>Urine | Pap smear | MCS (Microscopy, culture band sensitivity) |

| Item                                                                                                                  |           |
|-----------------------------------------------------------------------------------------------------------------------|-----------|
| <b>General</b>                                                                                                        |           |
| Specimens are clearly labelled                                                                                        |           |
| Each laboratory request form is correctly completed                                                                   |           |
| There is at least one functional wall mounted thermometer in area for lab specimens are stored for courier collection | PHC-E-114 |
| The temperature of the storage area for lab specimens is recorded daily                                               | PHC-C-134 |
| <b>Group A specimens</b>                                                                                              |           |
| Samples are kept away from direct sunlight                                                                            |           |
| Where the room temperature exceeds 25°C, samples are stored in the fridge (at +/- 5°C)                                | PHC-F-022 |
| Length of storage does not exceed 24 hours, stored at room temperature (+/- 20-25°C)                                  |           |
| <b>Group B specimens</b>                                                                                              |           |
| Stored at room temperature                                                                                            |           |
| Stored inside a slide carrier (envelope)                                                                              |           |
| <b>Group C specimens</b>                                                                                              |           |
| Samples placed into the transport medium provided (where appropriate)                                                 |           |
| Samples kept away from direct sunlight                                                                                |           |
| Where room temperature exceeds 25°C, samples are stored in the fridge (+/- 5°C)                                       | PHC-F-022 |
| Length of storage does not exceed 24 hours, stored at room temperature (+/- 20-25°C)                                  |           |

## CHECKLIST FOR ELEMENT: HEALTH CARE WASTE IS MANAGED APPROPRIATELY

Use the checklist below to check whether health risk care waste is managed appropriately

| Item                                                                                    |                   |
|-----------------------------------------------------------------------------------------|-------------------|
| Sanitary disposal bins with functional lids OR health care risk waste box               | PHC-E-004         |
| * Sanitary disposal bins/boxes lined with appropriate colour plastic bags               | PHCC196           |
| Sanitary disposal bins/boxes are clean and not overflowing                              |                   |
| Health care risk waste disposal bins with functional lids OR health care risk waste box | PHC-E-047         |
| Health care risk waste disposal bins/boxes lined with red colour plastic bags           | PHC-C-195         |
| Health care risk waste disposal bins/boxes contain only health care waste               |                   |
| Health care risk waste disposal bins/boxes are not overflowing                          |                   |
| Bins available for general waste                                                        | PHC-E-046, 049    |
| Bins for general waste are lined with appropriate coloured bags                         | PHC-C-190 onwards |

\* If disposable boxes for sanitary waste is used where gel granules in the bottom of the box treat the waste, no bag is required and facility can score "Y"

## CHECKLIST FOR ELEMENT: THERE IS A STANDARD SECURITY GUARD-ROOM OR THE FACILITY HAS AN ALARM SYSTEM LINKED TO ARMED RESPONSE

Use the checklist below to check whether facility security adheres to standard guidelines

| Item                                                                                                                                                                                                                          |           |
|-------------------------------------------------------------------------------------------------------------------------------------------------------------------------------------------------------------------------------|-----------|
| Does the facility have an alarm system linked to armed response (if Yes, checklist for security guardroom and security equipment must not be assessed. If No, assess checklist for security guardroom and security equipment) |           |
| Security guard room                                                                                                                                                                                                           |           |
| Kitchenette – sink with cupboard underneath                                                                                                                                                                                   |           |
| Table                                                                                                                                                                                                                         | PHC-F-008 |
| Chair                                                                                                                                                                                                                         | PHC-F-003 |
| Functioning lights                                                                                                                                                                                                            |           |
| Security equipment for security officer(s) and accompanying stationery                                                                                                                                                        |           |
| Baton                                                                                                                                                                                                                         |           |
| Handcuffs OR Cable ties                                                                                                                                                                                                       |           |
| Incident book                                                                                                                                                                                                                 |           |
| Metal detector                                                                                                                                                                                                                |           |
| Telephone OR two-way radio OR dedicated cellphone                                                                                                                                                                             |           |

**CHECKLIST FOR ELEMENT: ALL STAFF MEMBERS WEAR AN IDENTIFICATION TAGS**

Use the checklist below to check that the staff on duty wear official identification tags

| Staff member    |           |
|-----------------|-----------|
| Staff member 1  | PHC-C-202 |
| Staff member 2  | PHC-C-202 |
| Staff member 3  | PHC-C-202 |
| Staff member 4  | PHC-C-202 |
| Staff member 5  | PHC-C-202 |
| Staff member 6  | PHC-C-202 |
| Staff member 7  | PHC-C-202 |
| Staff member 8  | PHC-C-202 |
| Staff member 9  | PHC-C-202 |
| Staff member 10 | PHC-C-202 |

**Note:** Identification tag must include the emblem of the facility/district or provincial department of health, full names/initials and surname of the staff member

## CHECKLIST FOR ELEMENT: HAND HYGIENE AND SANITARY FACILITIES ARE AVAILABLE AT THE 8 HOUR SERVICE AREA

Use the checklist below to check whether there is running water, toilet paper, liquid hand wash soap and disposable hand paper towels

| Item                                  |                |
|---------------------------------------|----------------|
| <b>Toilet</b>                         |                |
| Functional hand wash basin with taps  |                |
| Running water                         |                |
| Toilet paper                          | PHC-C-081      |
| Liquid hand wash soap                 | PHC-C-058      |
| Disposable hand paper towels          | PHC-C-072, 073 |
| <b>8 Hour service area</b>            |                |
| Functional hand wash basin with taps  |                |
| Running water                         |                |
| Liquid hand wash soap/hand sanitiser  | PHC-C-058      |
| Disposable hand paper towels          | PHC-C-072, 073 |
| <b>Health Support and Oral Health</b> |                |
| Functional hand wash basin with taps  |                |
| Running water                         |                |
| Liquid hand wash soap/hand sanitiser  | PHC-C-058      |
| Disposable hand paper towels          | PHC-C-072, 073 |



# INDEX

## ITEM SPECIFICATIONS

|                                                     |     |                                                       |     |
|-----------------------------------------------------|-----|-------------------------------------------------------|-----|
| <b>A</b>                                            |     | Blood pressure monitor: automated non-invasive.....19 |     |
| Acid etch .....                                     | 348 | Bobath ball .....                                     | 91  |
| AED replacement Pads .....                          | 285 | Bobath roller.....                                    | 92  |
| Aerosol insecticide .....                           | 438 | Bolts and nuts: assorted .....                        | 422 |
| Air freshener .....                                 | 439 | Bonding agent: self-etch.....                         | 354 |
| Aluminium crutches .....                            | 88  | Bowie-Dick test packs.....                            | 411 |
| Amalgamator: digital .....                          | 68  | Bowl: large .....                                     | 201 |
| Amalgam capsule.....                                | 349 | Bowl: small.....                                      | 202 |
| Amalgam carrier: plastic.....                       | 206 | Breadboard: one-handed.....                           | 37  |
| Amalgam plugger .....                               | 208 | Broom.....                                            | 148 |
| Amalgam separator: 2 surgeries.....                 | 67  | Broom: interior use .....                             | 128 |
| Amniotomy hook.....                                 | 286 | Brush: applicator .....                               | 355 |
| Anaesthetic: topical .....                          | 350 | Bucket for kick-about.....                            | 475 |
| Antibacterial filter: portable suction machine..... | 287 | Buckets: colour coded.....                            | 129 |
| Antibacterial filter: trolley suction.....          | 288 | Building maintenance .....                            | 631 |
| Appointment cards: general .....                    | 268 | Bur Block.....                                        | 210 |
| Apron: dental, plastic.....                         | 351 | Bur brush .....                                       | 211 |
| Aprons: disposable.....                             | 413 |                                                       |     |
| Articulating paper: thin, blue .....                | 352 | <b>C</b>                                              |     |
| Audiometer: portable.....                           | 109 | Cabinet: medicine, mobile .....                       | 476 |
| Autoclave: cassette-type, desktop.....              | 69  | Cabinet: scheduled drugs, wall-mounted.....           | 477 |
| Autoclave: tabletop.....                            | 63  | Cable ties: nylon, .....                              | 378 |
| Automated external defibrillator.....               | 46  | Cardboard: A4, various colours.....                   | 379 |
|                                                     |     | Cardiac arrest board .....                            | 48  |
| <b>B</b>                                            |     | Cardiotocograph.....                                  | 20  |
| Bags: waste .....                                   | 440 | Cards: therapy, speech .....                          | 110 |
| Balance pad.....                                    | 89  | Carver: Amalgam .....                                 | 212 |
| Ball burnisher .....                                | 209 | Carver: wax.....                                      | 213 |
| Bandage: crepe .....                                | 289 | Catheter: intrathoracic, silicon.....                 | 292 |
| Basic tool kit.....                                 | 118 | Catheter: suction .....                               | 293 |
| Basin .....                                         | 200 | Cement: zinc oxide and eugenol .....                  | 356 |
| Basin: portable, large.....                         | 90  | Cerumen management kit.....                           | 261 |
| Bassinet .....                                      | 470 | Chair: office.....                                    | 507 |
| Batteries: hearing aid.....                         | 375 | Chair: operator.....                                  | 508 |
| Bed: hospital, 2-section .....                      | 471 | Chair: stackable, metal frame .....                   | 509 |
| Bed: hospital, mattress.....                        | 472 | Chair: stackable, netted mid-back .....               | 510 |
| Bed: hospital, mattress cover .....                 | 473 | Chair: visitor.....                                   | 511 |
| Bed: hospital, obstetric .....                      | 474 | Chlorine compounds (bleach).....                      | 441 |
| Bib: plastic .....                                  | 353 | Cleaning.....                                         | 667 |
| Bicarbonate of soda: sachets.....                   | 376 | Clinical.....                                         | 724 |
| Bin: pedal 4,5 l.....                               | 123 | Clock: wall.....                                      | 173 |
| Bin: pedal 20l.....                                 | 124 | Cloths: cleaning.....                                 | 442 |
| Bin: sanitary towel.....                            | 126 | Cold chain .....                                      | 686 |
| Bins: brazier.....                                  | 172 | Coloured pencils, pens, crayons.....                  | 380 |
| Bin: sharps .....                                   | 127 | Complaints and suggestions box.....                   | 174 |
| Bins: waste, heavy duty.....                        | 147 | Composites.....                                       | 357 |
| Bin: wall-mounted, refuse bag holding unit.....     | 125 | Compressor: 2-4 surgeries .....                       | 70  |
| Blade: scalpel.....                                 | 290 | Construction play equipment .....                     | 93  |
| Blade: stitch-cutter .....                          | 291 | Contact adhesive.....                                 | 423 |
| Blood pressure measurement: aneroid type.....       | 18  | Cooler box .....                                      | 140 |

|                                                  |     |
|--------------------------------------------------|-----|
| Cord clamp: umbilical .....                      | 346 |
| Cotton wool: balls 1g (500s) .....               | 294 |
| Cotton wool pellets .....                        | 358 |
| Couch: treatment, hydraulic Bobath (neuro) ..... | 478 |
| Credenza .....                                   | 512 |
| Cupboard: sterile stock .....                    | 513 |
| Curette: cerumen, lighted .....                  | 263 |
| Curette: cerumen, lighted .....                  | 381 |
| Curette: cerumen, plastic .....                  | 262 |
| Cushion covers: wheelchair .....                 | 383 |
| Cushion: wheelchair .....                        | 382 |
| Cuspidor/Spittoon/Water Unit .....               | 71  |

## D

|                                                                  |     |
|------------------------------------------------------------------|-----|
| Dappen dish .....                                                | 214 |
| Delivery system: fixed, with hand pieces, non-fibre-optic .....  | 73  |
| Delivery system: mobile, with hand pieces, non-fibre-optic ..... | 72  |
| Dental chair: basic .....                                        | 74  |
| Dental chair: portable .....                                     | 75  |
| Dental curing light .....                                        | 76  |
| Dental Explorer .....                                            | 215 |
| Dental floss: Waxed .....                                        | 359 |
| Dental handpieces: non-fibre-optic .....                         | 77  |
| Dental light: LED .....                                          | 78  |
| Dental Probe: periodontal .....                                  | 216 |
| Dental scaler: air .....                                         | 79  |
| Desk: 3-drawer, L-shaped .....                                   | 514 |
| Desk: rectangular .....                                          | 515 |
| Detergent: liquid or powder .....                                | 443 |
| Diagnostic .....                                                 | 542 |
| Diagnostic combination set: wall mounted .....                   | 23  |
| Diagnostic set: portable .....                                   | 21  |
| Diagnostic set: wall mounted .....                               | 22  |
| Dishwashing liquid .....                                         | 444 |
| Disposable paper cups .....                                      | 466 |
| Drainage system: chest, underwater, adult .....                  | 295 |
| Drain cleaner .....                                              | 445 |
| Dressing pack: disposable .....                                  | 296 |
| Drip stand .....                                                 | 479 |
| Dry socket alveolar paste .....                                  | 360 |
| Dust pan and brush set .....                                     | 130 |

## E

|                                                                  |     |
|------------------------------------------------------------------|-----|
| Ear loop: Bileau, small .....                                    | 264 |
| Ear mould impression material and scoop .....                    | 384 |
| Ear mould impression Otolight: replacement globe .....           | 385 |
| Ear mould impression Otolight: replacement tips .....            | 386 |
| ECG electrodes: disposable, self-adhesive, for resting ECG ..... | 297 |
| Edge Trimmer/brush cutter: heavy duty .....                      | 149 |
| Electrocardiograph: 12 channel .....                             | 24  |
| Elevator: root, apical .....                                     | 217 |
| Elevator: root, Cryers .....                                     | 218 |
| Elevator: root, Warwick-James .....                              | 219 |
| Endotracheal tubes: cuffed .....                                 | 298 |
| Endotracheal tubes: uncuffed .....                               | 299 |
| Essential .....                                                  | 570 |
| Examination couch .....                                          | 480 |

|                                                    |     |
|----------------------------------------------------|-----|
| Examination couch: portable .....                  | 481 |
| Examination couch: rehab .....                     | 482 |
| Examination light: ceiling-mounted .....           | 39  |
| Examination light: headlamp .....                  | 40  |
| Examination light: mobile, without battery .....   | 41  |
| Examination light: wall-mounted .....              | 42  |
| Excavator: dental .....                            | 220 |
| Exercise band: latex .....                         | 387 |
| Extension cable: electrical, garden .....          | 150 |
| Extension cable: electrical, general purpose ..... | 120 |
| Eye patch: disposable .....                        | 300 |

## F

|                                                                    |     |
|--------------------------------------------------------------------|-----|
| Face shield .....                                                  | 414 |
| Feeding cup .....                                                  | 388 |
| Feeding spoon .....                                                | 389 |
| Ferrule: rubber .....                                              | 390 |
| Files and accessories .....                                        | 463 |
| Filing cabinet: four-drawer .....                                  | 518 |
| Filling Cabinet: bulk .....                                        | 516 |
| Fire extinguisher .....                                            | 144 |
| Fire hose on reel .....                                            | 145 |
| Fire safety .....                                                  | 690 |
| Fissure sealants .....                                             | 361 |
| Flat plastic .....                                                 | 221 |
| Floor polisher: electric, single disc .....                        | 519 |
| Floor polisher replacement Cleaning disc .....                     | 448 |
| Floor polisher replacement Scouring disc .....                     | 449 |
| Floor polymer remover .....                                        | 446 |
| Floor protective polymer .....                                     | 447 |
| Fluoride gel .....                                                 | 363 |
| Fluoride trays .....                                               | 362 |
| Foam: EVA .....                                                    | 391 |
| Foam: HD compressed 1300 .....                                     | 393 |
| Foam: high-density, 36/20 .....                                    | 392 |
| Foetoscope .....                                                   | 25  |
| Foot stool .....                                                   | 483 |
| Forceps: artery, curved .....                                      | 187 |
| Forceps: artery, straight .....                                    | 188 |
| Forceps: crocodile .....                                           | 265 |
| Forceps: mosquito, curved .....                                    | 191 |
| Forceps: mosquito, straight .....                                  | 192 |
| Forceps: non-toothed .....                                         | 189 |
| Forceps: tongue .....                                              | 222 |
| Forceps: toothed .....                                             | 190 |
| Forceps: tooth extracting, Lower Anteriors Adult .....             | 223 |
| Forceps: tooth extracting, Lower Bicuspids .....                   | 224 |
| Forceps: tooth extracting, Lower Canines Adult .....               | 225 |
| Forceps: tooth extracting, Lower Molars .....                      | 226 |
| Forceps: tooth extracting, Lower molars, child .....               | 238 |
| Forceps: tooth extracting, Lower roots and Crowded Incisors .....  | 227 |
| Forceps: tooth extracting, Lower teeth and roots, child .....      | 239 |
| Forceps: tooth extracting, Upper Anteriors and Canines .....       | 228 |
| Forceps: tooth extracting, Upper Bicuspids and Roots .....         | 229 |
| Forceps: tooth extracting, Upper Incisors and Canines, child ..... | 240 |
| Forceps: tooth extracting, Upper Molars, child .....               | 241 |
| Forceps: tooth extracting, Upper Molars, Left .....                | 230 |

|                                                                       |     |
|-----------------------------------------------------------------------|-----|
| Forceps: tooth extracting, Upper Molars, Right .....                  | 231 |
| Forceps: tooth extracting, Upper Molars, Right .....                  | 232 |
| Forceps: tooth extracting, Upper roots .....                          | 233 |
| Forceps: tooth extracting, Upper roots .....                          | 234 |
| Forceps: tooth extracting, Upper roots .....                          | 235 |
| Forceps: tooth extracting, Upper roots, Small .....                   | 237 |
| Forceps: tooth extracting, Upper teeth and roots, Molars, child ..... | 242 |
| Forceps: wire ligature .....                                          | 243 |
| Fork .....                                                            | 151 |
| Freezer: chest, human tissue .....                                    | 520 |

## G

|                                                              |     |
|--------------------------------------------------------------|-----|
| Gag (mouth prop) .....                                       | 244 |
| Garden .....                                                 | 693 |
| Gardening set: 3-piece .....                                 | 152 |
| Gauze: absorbent, Type 1, sterile, peel pack (5 swabs) ..... | 301 |
| Gauze: paraffin, 100X100 (box of 10) .....                   | 302 |
| Gauze: swabs, plain .....                                    | 303 |
| General .....                                                | 763 |
| Glass ionomer .....                                          | 364 |
| Gloves: non-sterile .....                                    | 416 |
| Gloves: sterile .....                                        | 415 |
| Glucometer .....                                             | 61  |
| Glucometer consumables .....                                 | 337 |
| Glue: cyanoacrylate, rapid .....                             | 424 |
| Glue: wood, waterproof .....                                 | 425 |
| Goggles .....                                                | 417 |
| Gown: disposable .....                                       | 418 |
| Gun safe .....                                               | 175 |

## H

|                                                                   |     |
|-------------------------------------------------------------------|-----|
| Haemoglobinmeter consumables and accessories (older models) ..... | 338 |
| Haemoglobinmeter consumables (newer models) .....                 | 339 |
| Haemoglobinometer .....                                           | 62  |
| Haemostat sponge .....                                            | 365 |
| Hand rub: alcohol-based .....                                     | 450 |
| Hedge clipper: shears, manual .....                               | 153 |
| Helix test kit and strips .....                                   | 412 |
| High level disinfectants .....                                    | 451 |
| HiPro box .....                                                   | 111 |
| HIV test kit: rapid .....                                         | 340 |
| Hoe .....                                                         | 154 |
| Holder: Bib .....                                                 | 245 |
| Holder: cotton pellet .....                                       | 246 |
| Hosepipe: garden .....                                            | 155 |
| Hot water bottle: standard .....                                  | 94  |

## I

|                                             |     |
|---------------------------------------------|-----|
| Identification tag .....                    | 467 |
| Infant warmer: mattress .....               | 50  |
| Infant warmer: radiant .....                | 49  |
| Infant warmer: temperature probe .....      | 51  |
| Instrument steriliser: desktop .....        | 65  |
| Intravenous administration set .....        | 304 |
| Intravenous cannula .....                   | 305 |
| Intravenous cannula: winged .....           | 306 |
| Introducer (intubation stylet): adult ..... | 184 |

|                                             |     |
|---------------------------------------------|-----|
| Introducer (intubation stylet): child ..... | 185 |
|---------------------------------------------|-----|

## K

|                        |     |
|------------------------|-----|
| Kettle: electric ..... | 167 |
| Kick-about .....       | 484 |
| Kidney dish .....      | 203 |
| Kitchen .....          | 712 |

## L

|                                            |     |
|--------------------------------------------|-----|
| Ladder: aluminium, folding .....           | 121 |
| Lancets, Multipurpose .....                | 341 |
| Laryngoscope set .....                     | 52  |
| Laundry detergent .....                    | 452 |
| Lawn mower: Electric, heavy duty .....     | 156 |
| Lawn mower: petrol, heavy duty .....       | 157 |
| Locker: bedside, steel .....               | 485 |
| Lubricant gel, sterile .....               | 307 |
| Lubricating/releasing oil: spray can ..... | 426 |

## M

|                                                                       |     |
|-----------------------------------------------------------------------|-----|
| Magill forceps: adult .....                                           | 182 |
| Magill forceps: child .....                                           | 183 |
| Malaria Rapid Diagnostic test kit .....                               | 342 |
| Mask: laryngeal, adult .....                                          | 308 |
| Mask: oxygen, diluter type .....                                      | 309 |
| Mask: oxygen, re-breathing type .....                                 | 310 |
| Masonite .....                                                        | 394 |
| Maternity health record .....                                         | 269 |
| Mat: gym .....                                                        | 95  |
| Matrix retainer .....                                                 | 247 |
| Microfibre cloth for static head mop .....                            | 453 |
| Microwave oven: 25l, 900W manual .....                                | 521 |
| Mirror .....                                                          | 522 |
| Mirror: handheld .....                                                | 96  |
| Miscellaneous .....                                                   | 716 |
| Monitor: multi-function vital signs, including SpO <sub>2</sub> ..... | 53  |
| Mop: colour-coded .....                                               | 131 |
| Mop: static head, complete .....                                      | 132 |
| Multi-plug .....                                                      | 122 |

## N

|                                   |     |
|-----------------------------------|-----|
| Nails: assorted .....             | 427 |
| Nasal Cannula: oxygen .....       | 311 |
| Nasogastric catheter .....        | 312 |
| Nebuliser .....                   | 54  |
| Needle holder .....               | 193 |
| Needle holder .....               | 249 |
| Needles: hypodermic .....         | 313 |
| Needles: Hypodermic, Dental ..... | 314 |
| Noise makers .....                | 112 |
| Notice board: wall-mounted .....  | 176 |

## O

|                                        |     |
|----------------------------------------|-----|
| OAE/AABR screener (portable) .....     | 113 |
| Oil: 2-stroke for brush cutter .....   | 428 |
| Oil: 20W50, for petrol lawnmower ..... | 429 |
| Oil: amica .....                       | 395 |

|                                        |     |
|----------------------------------------|-----|
| Order forms and books .....            | 464 |
| Oropharyngeal airway (Guedel) .....    | 318 |
| Otolight .....                         | 114 |
| Otoscope: portable .....               | 115 |
| Otostops .....                         | 396 |
| Oxygen regulator with flow-meter ..... | 55  |

**P**

|                                                |     |
|------------------------------------------------|-----|
| Padding: cast orthopaedic .....                | 315 |
| Pamphlet-holding boxes .....                   | 177 |
| Paper: print-out, tympanometer .....           | 397 |
| Paper towel dispenser: folded towels .....     | 133 |
| Paper towel dispenser: roll .....              | 134 |
| Paper towel: folded .....                      | 454 |
| Paper towel: roll .....                        | 455 |
| Particulate mask (N-95 respirator) .....       | 419 |
| Paste: prophylaxis .....                       | 366 |
| Patella hammer .....                           | 26  |
| Patient information register .....             | 270 |
| Patient record for adults .....                | 271 |
| Patient record for children .....              | 272 |
| Peak flow meter .....                          | 27  |
| Peak Flow Meter: mouth-piece, disposable ..... | 317 |
| Pelvic straps .....                            | 398 |
| Periodontal Hoe .....                          | 250 |
| Pick mattock .....                             | 158 |
| Plaster of Paris bandage .....                 | 316 |
| Plaster: self-adhesive, roll .....             | 319 |
| Polishing kit .....                            | 367 |
| Polishing strips .....                         | 368 |
| Polyester strips (composite) .....             | 369 |
| Poster display boards .....                    | 178 |
| Pressure garment material: elastonet .....     | 399 |
| Pulse oximeter: stand-alone .....              | 28  |

**R**

|                                            |     |
|--------------------------------------------|-----|
| Rack: cutlery .....                        | 169 |
| Rack: dish .....                           | 168 |
| Rake: leaf and grass, heavy duty .....     | 159 |
| Rake: steel, heavy duty .....              | 160 |
| Razor, disposable .....                    | 320 |
| Referral forms: general .....              | 273 |
| Referral forms: WBPHCOT .....              | 274 |
| Refrigerator: bar type .....               | 523 |
| Refrigerator: double door .....            | 524 |
| Refrigerator: single door .....            | 525 |
| Refrigerator: vaccine, chest .....         | 486 |
| Refrigerator: vaccine, upright model ..... | 487 |
| Register: assets .....                     | 275 |
| Register: Daily reception headcount .....  | 276 |
| Register: Monthly tally summary .....      | 277 |
| Register: Patient safety incident .....    | 278 |
| Register: PHC comprehensive .....          | 279 |
| Register: Weekly tally notepad .....       | 280 |
| Resuscitators: manual .....                | 56  |
| Rhesus test kit .....                      | 344 |
| Rivets: blind, aluminium, assorted .....   | 430 |

|                                        |     |
|----------------------------------------|-----|
| Road to Health Booklet for Boys .....  | 281 |
| Road to Health Booklet for Girls ..... | 282 |
| Rongeur: dental .....                  | 251 |

**S**

|                                                   |     |
|---------------------------------------------------|-----|
| Sanitary all-purpose cleaner .....                | 456 |
| Sanitary towels: maternity .....                  | 347 |
| Sanitary towels: standard .....                   | 321 |
| Scale: adult, with height board .....             | 29  |
| Scale: adult, without height board .....          | 30  |
| Scale: baby .....                                 | 31  |
| Scaler, Dental .....                              | 252 |
| Scalpel handle: long, No. 3 .....                 | 194 |
| Scissors: dissecting .....                        | 195 |
| Scissors: episiotomy .....                        | 204 |
| Scissors: ligature .....                          | 253 |
| Scissors: rescue .....                            | 186 |
| Scissors: splinting .....                         | 260 |
| Scissors: standard .....                          | 259 |
| Scissors: stitch .....                            | 196 |
| Scissors: umbilical .....                         | 205 |
| Screen: bedside, replacement curtains .....       | 489 |
| Screen: bedside, wheeled, complete .....          | 488 |
| Screws: chipboard, assorted .....                 | 431 |
| Screws: roofing, with sealing washers .....       | 432 |
| Screws: self-tapping, assorted .....              | 433 |
| Sealant: silicone, marine, clear .....            | 434 |
| Seating: 2-seater .....                           | 526 |
| Seating: 3-seater .....                           | 527 |
| Seating: 4-seater .....                           | 528 |
| Sewing kit .....                                  | 400 |
| Sheath: incontinence .....                        | 322 |
| Shovel: square mouth .....                        | 161 |
| Sick note .....                                   | 283 |
| Skin traction kit .....                           | 323 |
| Slab: mixing, glass .....                         | 254 |
| Slasher .....                                     | 162 |
| Smoke alarm .....                                 | 146 |
| Soap: antimicrobial .....                         | 457 |
| Soap dispenser .....                              | 135 |
| Soap: handwashing, liquid non-antimicrobial ..... | 458 |
| Soccer ball .....                                 | 97  |
| Spade .....                                       | 163 |
| Spatula: Cement .....                             | 255 |
| Specialised .....                                 | 577 |
| Splinting material: thermoplastic sheets .....    | 401 |
| Splinting material: thermoplastic tape .....      | 402 |
| Spray bottle .....                                | 136 |
| Squeegee .....                                    | 137 |
| Stadiometer .....                                 | 32  |
| Standing frame: prone upper standing frame .....  | 98  |
| Steel cabinet: lockable, 6 shelves .....          | 529 |
| Stethoscope .....                                 | 33  |
| Stitch tray: small .....                          | 197 |
| Stockinette: 100mm, roll 25m .....                | 324 |
| Stockinette: 150mm, roll 25m .....                | 325 |
| Stool: anaesthetist .....                         | 490 |

|                                                  |     |                                                                |     |
|--------------------------------------------------|-----|----------------------------------------------------------------|-----|
| Stool: dental assistant.....                     | 491 | Trolley: medical dressing, small.....                          | 500 |
| Stool: dentist.....                              | 492 | Trolley: medical dressing with bucket and bowl attachment..... | 501 |
| Stool: height-adjustable, with backrest.....     | 493 | Trolley: medical instruments, medium.....                      | 499 |
| Storage rack: exercise ball, wall-mounted.....   | 530 | Trolley: patient, with mattress.....                           | 502 |
| Suction: dry, 2-3 surgeries.....                 | 80  | Trolley: soiled instruments and linen.....                     | 503 |
| Suction: dry, mobile.....                        | 81  | Trolley: soiled linen, complete.....                           | 504 |
| Suction machine: portable.....                   | 57  | Tube: stomach washout.....                                     | 334 |
| Suction machine: trolley type.....               | 58  | Tumble dryer.....                                              | 533 |
| Suction: wet, 2-4 surgeries.....                 | 82  | Tuning fork.....                                               | 38  |
| Surgical mask.....                               | 420 | Tweezers: Cotton and Dressing.....                             | 258 |
| Surgical scrub brush sponges.....                | 459 | Tympanometer: portable, screening.....                         | 116 |
| Suture material: intra-oral.....                 | 370 |                                                                |     |
| Suture materials.....                            | 326 | <b>U</b>                                                       |     |
| Swab: 70% isopropyl alcohol.....                 | 327 | Ultrasonic cleaner.....                                        | 83  |
| Swab holder.....                                 | 198 | Ultrasound gel.....                                            | 335 |
| Syringe: dental.....                             | 199 | Urinary catheters (Foley's).....                               | 336 |
| Syringe: dental, aspirating.....                 | 256 | Urine collection.....                                          | 45  |
| Syringe: ear.....                                | 34  | Urine dip sticks.....                                          | 345 |
| Syringe: hypodermic.....                         | 328 | Urn: electric.....                                             | 170 |
| Syringe: impression.....                         | 266 |                                                                |     |
|                                                  |     | <b>V</b>                                                       |     |
| <b>T</b>                                         |     | Vacuum cleaner.....                                            | 534 |
| Table: folding.....                              | 531 | Vacuum cleaner replacement filter set.....                     | 461 |
| Table: over- bed.....                            | 494 | Varnish: cavity liner.....                                     | 374 |
| Table: trapezoidal.....                          | 532 | Varnish: wood.....                                             | 404 |
| Tampon: vaginal.....                             | 329 | Velcro: circle, self-adhesive.....                             | 405 |
| Tape: Broselow.....                              | 59  | Velcro: loop, 5cm width, 50m roll.....                         | 406 |
| Tape: insulation.....                            | 435 | Viewing box: X-ray.....                                        | 505 |
| Tape measure: retractable, soft.....             | 99  |                                                                |     |
| Tape: measuring.....                             | 43  | <b>W</b>                                                       |     |
| Tape: MUAC.....                                  | 44  | Walking frame.....                                             | 102 |
| Tape: PAWPER and flipper chart.....              | 60  | Walking stick.....                                             | 104 |
| Tape: surgical. Adhesive, microporous, 25mm..... | 330 | Washboard: one-handed.....                                     | 407 |
| Tape: surgical. Adhesive, microporous, 50mm..... | 331 | Washers: locking, assorted.....                                | 436 |
| Temperature recording forms.....                 | 284 | Washers: plain, galvanised.....                                | 437 |
| Thermal blanket.....                             | 332 | Washing machine: front loader.....                             | 535 |
| Thermometer: data logging.....                   | 141 | Washing machine: top loader.....                               | 536 |
| Thermometer: digital, ear-type.....              | 35  | Watercooler: free-standing.....                                | 171 |
| Thermometer: digital, pen type.....              | 36  | Water distillation.....                                        | 84  |
| Thermometer probe covers: disposable.....        | 333 | Watering can.....                                              | 164 |
| Thermometer: refrigerator.....                   | 142 | Water packs for cold box.....                                  | 468 |
| Thermometer: room.....                           | 143 | Wedges: set of 4.....                                          | 105 |
| Tip: dental suction (saliva ejector).....        | 371 | Weight band: ankle and wrist.....                              | 106 |
| Toilet paper.....                                | 460 | Wheelbarrow.....                                               | 165 |
| Toilet roll dispenser.....                       | 138 | Wheelchair.....                                                | 107 |
| Toothbrush.....                                  | 372 | Wheelchair gloves.....                                         | 409 |
| Toothpaste: dental, fluoride.....                | 373 | Wheelchair: porter.....                                        | 506 |
| Torch: pupillary.....                            | 37  | Wheelchair spares kit.....                                     | 408 |
| Towelling.....                                   | 403 | Whiteboard.....                                                | 179 |
| Toys: multisensory.....                          | 100 | Wood.....                                                      | 410 |
| Transfer board.....                              | 101 | Writing materials.....                                         | 465 |
| Trimmer: Gingival margin.....                    | 257 |                                                                |     |
| Trolley: anaesthetic.....                        | 495 | <b>X</b>                                                       |     |
| Trolley: emergency.....                          | 496 | X-ray Apron.....                                               | 85  |
| Trolley: gas cylinder.....                       | 497 | X-ray: Digital oral imaging plate with a computer.....         | 87  |
| Trolley: janitor.....                            | 139 |                                                                |     |
| Trolley: medical dressing, large.....            | 498 |                                                                |     |

## TECHNICAL SPECIFICATIONS

### A

|                                              |     |
|----------------------------------------------|-----|
| Adult manual resuscitator .....              | 591 |
| Allen key set .....                          | 631 |
| Amalgamator: digital .....                   | 609 |
| Amalgam separator: 2 surgeries .....         | 608 |
| Autoclave: tabletop .....                    | 602 |
| Automated external defibrillator (AED) ..... | 577 |

### B

|                                                                      |     |
|----------------------------------------------------------------------|-----|
| Bassinet .....                                                       | 724 |
| Bassinet, plastic, spare .....                                       | 724 |
| Bed: hospital, 2-section .....                                       | 725 |
| Bed: hospital, mattress .....                                        | 726 |
| Bed: hospital, mattress cover .....                                  | 727 |
| Bed: hospital, obstetric .....                                       | 728 |
| Bedpan .....                                                         | 575 |
| Bin: general Waste, 140l, green, with wheels .....                   | 693 |
| Bin: general Waste, 240l, black, with wheels .....                   | 693 |
| Bin: Healthcare Risk Waste, 140l, red, with wheels .....             | 693 |
| Bin: pedal, 4,5l .....                                               | 667 |
| Bin: pedal, 20l .....                                                | 668 |
| Bin: sanitary towel .....                                            | 670 |
| Bin: sharps .....                                                    | 671 |
| Bin: wall-mounted, refuse bag holding unit .....                     | 669 |
| Blood pressure monitor: automated, non-invasive, desktop model ..... | 544 |
| Brazier bin: 105x135x75 .....                                        | 716 |
| Brazier bin: 105x190x75 .....                                        | 716 |
| Brazier bin: 140x210x130 .....                                       | 716 |
| Brazier bin: 140x280x130 .....                                       | 716 |
| Broom: garden .....                                                  | 694 |
| Broom: interior use .....                                            | 672 |
| Broselow tape .....                                                  | 597 |
| Bucket for kick-about .....                                          | 730 |
| Buckets: colour-coded .....                                          | 673 |

### C

|                                              |     |
|----------------------------------------------|-----|
| Cabinet: medicine, mobile .....              | 731 |
| Cabinet: scheduled drugs, wall-mounted ..... | 732 |
| Cardiac arrest board .....                   | 580 |
| Cardiotocograph .....                        | 547 |
| Chair: office, mid-back .....                | 763 |
| Chair: operator, high back .....             | 764 |
| Chair: stackable, ABS shell .....            | 765 |
| Chair: stackable, netted, mid-back .....     | 766 |
| Chair: visitor, mid back .....               | 767 |
| Child manual resuscitator .....              | 590 |
| Clamps: adjustable (pair) .....              | 632 |
| Clock: wall .....                            | 717 |
| Complaints and suggestions box .....         | 718 |
| Compressor: 2-4 surgeries .....              | 611 |
| Credenza .....                               | 768 |
| Cuspidor/Spittoon/Water Unit .....           | 612 |

### D

|                                                                  |     |
|------------------------------------------------------------------|-----|
| Data logging thermometer .....                                   | 687 |
| Delivery system: fixed, with hand pieces, non-fibre-optic .....  | 614 |
| Delivery system: mobile, with hand pieces, non-fibre-optic ..... | 613 |
| Dental chair: basic .....                                        | 616 |
| Dental chair: portable .....                                     | 617 |
| Dental curing light: corded .....                                | 618 |
| Dental curing light: cordless .....                              | 618 |
| Dental light: LED .....                                          | 622 |
| Dental scaler: air .....                                         | 623 |
| Desk: L-shape, 3-drawer .....                                    | 770 |
| Desk, rectangular .....                                          | 772 |
| Desktop Autoclave S-Type for Dental Instruments .....            | 610 |
| Diagnostic combination set: wall-mounted .....                   | 553 |
| Diagnostic set: portable .....                                   | 550 |
| Diagnostic set: wall-mounted .....                               | 551 |
| Disclaimer .....                                                 | ii  |
| Dispenser: toilet roll .....                                     | 684 |
| Drill bit set .....                                              | 634 |
| Drill, cordless .....                                            | 633 |
| Drip stand: mobile .....                                         | 734 |
| Dust pan and brush set .....                                     | 674 |

### E

|                                                                 |     |
|-----------------------------------------------------------------|-----|
| Edge trimmer/brush cutter: petrol, heavy duty .....             | 695 |
| Electrocardiograph (ECG): 12 channel .....                      | 554 |
| Examination couch .....                                         | 735 |
| Examination couch: portable .....                               | 736 |
| Examination couch: rehab .....                                  | 737 |
| Examination light: clinical. Ceiling-mounted, directional ..... | 570 |
| Examination light: clinical, wall-mounted, directional .....    | 573 |
| Examination light: headlamp .....                               | 571 |
| Examination light: mobile, without battery .....                | 572 |
| Extension cable: electrical, garden .....                       | 696 |
| Extension cable: electrical, general purpose, 3m .....          | 635 |
| Extension cable: electrical, general purpose, 5m .....          | 635 |
| Extension cable: electrical, general purpose, 10m .....         | 635 |
| Extension cable: on reel, 20m .....                             | 635 |

### F

|                                             |     |
|---------------------------------------------|-----|
| File, flat, combined .....                  | 636 |
| Filing cabinet: 4-drawer .....              | 776 |
| Filing cabinet: bulk .....                  | 774 |
| Fire extinguisher .....                     | 690 |
| Fire hose on reel .....                     | 691 |
| Floor polisher: electric, single disc ..... | 777 |
| Foam cutter, electric .....                 | 637 |
| Foot stool .....                            | 738 |
| Fork: garden, 4-pronged .....               | 697 |
| Frying pan, electric .....                  | 638 |
| Funnel, plastic, medium .....               | 639 |

|                                                                      |     |
|----------------------------------------------------------------------|-----|
| <b>G</b>                                                             |     |
| Gardening set: 3-piece.....                                          | 698 |
| Glucometer.....                                                      | 599 |
| Gun safe.....                                                        | 719 |
| <b>H</b>                                                             |     |
| Hacksaw, all-metal.....                                              | 640 |
| Hacksaw blades, assorted.....                                        | 641 |
| Haemoglobinmeter.....                                                | 601 |
| Hammer: claw, approximately 450gm.....                               | 642 |
| Hearing protector (muffs).....                                       | 643 |
| Heat gun, electric.....                                              | 644 |
| Hedge shears.....                                                    | 699 |
| Hoe.....                                                             | 700 |
| Hosepipe: garden.....                                                | 701 |
| <b>I</b>                                                             |     |
| Infant manual resuscitator.....                                      | 589 |
| Infant warmer: radiant, mobile.....                                  | 581 |
| Instrument steriliser: desktop.....                                  | 605 |
| <b>J</b>                                                             |     |
| Jigsaw blades, set.....                                              | 646 |
| Jigsaw, electric.....                                                | 645 |
| <b>K</b>                                                             |     |
| Kettle: electric.....                                                | 712 |
| Kick-about.....                                                      | 739 |
| <b>L</b>                                                             |     |
| Ladder: aluminium.....                                               | 647 |
| Laryngoscope set for PHC facilities.....                             | 583 |
| Lawn mower: electric, heavy duty.....                                | 702 |
| Lawnmower: petrol, heavy duty.....                                   | 703 |
| Locker: bedside, steel.....                                          | 740 |
| <b>M</b>                                                             |     |
| Mattress for bassinet, spare.....                                    | 724 |
| Measuring rule, folding.....                                         | 648 |
| Microwave oven.....                                                  | 778 |
| Mirror.....                                                          | 779 |
| Monitor: multifunction vital signs, including SpO <sub>2</sub> ..... | 584 |
| Mop: black.....                                                      | 675 |
| Mop: blue.....                                                       | 675 |
| Mop: red.....                                                        | 675 |
| Mop: static head, complete.....                                      | 676 |
| Multi-plug.....                                                      | 649 |
| <b>N</b>                                                             |     |
| Nebuliser.....                                                       | 587 |
| Notice board: A2 size.....                                           | 720 |
| Notice board: A3 size.....                                           | 720 |
| <b>O</b>                                                             |     |
| Oral Health.....                                                     | 12  |
| Oxygen regulator with flow-meter.....                                | 588 |
| <b>P</b>                                                             |     |
| Pamphlet-holding boxes.....                                          | 721 |
| Paper towel dispenser: folded towels.....                            | 677 |
| Paper towel dispenser: roll.....                                     | 678 |
| Patella hammer.....                                                  | 557 |
| PAWPER tape.....                                                     | 598 |
| Peak flow meter.....                                                 | 558 |
| PEEP valve.....                                                      | 592 |
| Pick mattock.....                                                    | 704 |
| Pliers set.....                                                      | 650 |
| Poster display boards: A0 size.....                                  | 722 |
| Poster display boards: A1 size.....                                  | 722 |
| Pruning saw, medium.....                                             | 651 |
| Pruning shears, bypass, heavy-duty.....                              | 652 |
| Pulse oximeter: stand-alone.....                                     | 559 |
| Punch, eyelet.....                                                   | 654 |
| Punch, revolving.....                                                | 653 |
| <b>R</b>                                                             |     |
| Rack: cutlery.....                                                   | 713 |
| Rack: dish.....                                                      | 713 |
| Rake: leaf and grass, heavy duty.....                                | 705 |
| Rake: steel, heavy duty.....                                         | 706 |
| Refrigerator: bar type.....                                          | 780 |
| Refrigerator: double door.....                                       | 781 |
| Refrigerator: single door.....                                       | 782 |
| Refrigerator: vaccines, chest model.....                             | 741 |
| Refrigerator: vaccines, upright model.....                           | 742 |
| Rehabilitation Services.....                                         | 12  |
| Riveter, hand.....                                                   | 655 |
| Room thermometer.....                                                | 689 |
| <b>S</b>                                                             |     |
| Scale: adult, with height board.....                                 | 560 |
| Scale: adult, without height board.....                              | 561 |
| Scale: baby.....                                                     | 562 |
| Scraper, paint, medium.....                                          | 656 |
| Screen: bedside, replacement curtains.....                           | 744 |
| Screen: bedside, wheeled. Complete with curtain.....                 | 743 |
| Screwdriver set.....                                                 | 657 |
| Seating: waiting area, 2-seater.....                                 | 783 |
| Seating: waiting area, 3-seater.....                                 | 784 |
| Seating: waiting area, 4-seater.....                                 | 785 |
| Sharpening stone, medium/fine combined.....                          | 658 |
| Shifting spanner: 0-40mm.....                                        | 659 |
| Shovel: square mouth.....                                            | 707 |
| Slasher.....                                                         | 708 |
| Smoke alarm.....                                                     | 692 |
| Soap dispenser.....                                                  | 679 |



|                                                 |     |                                                                 |     |
|-------------------------------------------------|-----|-----------------------------------------------------------------|-----|
| Spade, garden .....                             | 709 | Trolley: medical dressing, small .....                          | 755 |
| Sphygmomanometer: aneroid .....                 | 542 | Trolley: medical dressing with bucket and bowl attachment ..... | 756 |
| Spray bottle: 2l .....                          | 681 | Trolley: medical instruments, medium .....                      | 754 |
| Spray bottle: 10l backpack .....                | 682 | Trolley: patient .....                                          | 757 |
| Spray bottle: 750ml .....                       | 680 | Trolley: soiled instruments and linen, complete .....           | 758 |
| Squeegee .....                                  | 683 | Trolley: soiled linen, complete .....                           | 760 |
| Stadiometer .....                               | 563 | Tumble dryer .....                                              | 792 |
| Stationery cabinet .....                        | 786 | Tuning fork set .....                                           | 569 |
| Sterile stock cabinet .....                     | 787 | Turbine: full range .....                                       | 619 |
| Stethoscope: dual head .....                    | 564 |                                                                 |     |
| Stool: anaesthetist .....                       | 745 | <b>U</b>                                                        |     |
| Stool: dental assistant .....                   | 746 | Ultrasonic cleaner .....                                        | 627 |
| Stool: dentist .....                            | 747 | Urine jar or flask .....                                        | 576 |
| Stool: height adjustable, with backrest .....   | 748 | Urn: electric .....                                             | 714 |
| Storage rack: exercise ball, wall-mounted ..... | 788 | Utility knife, retractable blade .....                          | 663 |
| Suction: dry, 2-4 surgeries .....               | 624 |                                                                 |     |
| Suction machine: portable .....                 | 593 | <b>V</b>                                                        |     |
| Suction: mobile .....                           | 625 | Vaccine cooler box .....                                        | 686 |
| Suction: trolley-type .....                     | 595 | Vacuum cleaner .....                                            | 793 |
| Suction: wet, 2-4 surgeries .....               | 626 | Voltage tester, contactless .....                               | 664 |
| Swivel-head spanner set .....                   | 660 |                                                                 |     |
| Syringe: Ear .....                              | 565 | <b>W</b>                                                        |     |
|                                                 |     | Washing machine: front loader .....                             | 794 |
| <b>T</b>                                        |     | Washing machine: top loader .....                               | 795 |
| Table: folding .....                            | 789 | Watercooler: free-standing, bottled .....                       | 715 |
| Table: over- bed .....                          | 749 | Water distillation .....                                        | 628 |
| Table: trapezoidal .....                        | 790 | Watering can .....                                              | 710 |
| Tape measure: clinical .....                    | 574 | Water packs for vaccine cool box .....                          | 686 |
| Tape measure: industrial .....                  | 661 | Water-pump pliers .....                                         | 665 |
| Thermometer: digital, ear-type .....            | 566 | Wheelbarrow .....                                               | 711 |
| Thermometer, digital pen type .....             | 567 | Wheelchair: porter .....                                        | 762 |
| Thermometer: refrigerator .....                 | 688 | Whiteboard: 1200x1000 .....                                     | 723 |
| Tool box .....                                  | 662 | Whiteboard: 1800x1200 .....                                     | 723 |
| Torch: pupillary .....                          | 568 | Whiteboard: 3000x1200 .....                                     | 723 |
| Treatment couch: hydraulic Bobath (neuro) ..... | 733 | Workbench, folding, portable .....                              | 666 |
| Trolley: anaesthetic .....                      | 750 |                                                                 |     |
| Trolley: emergency .....                        | 751 | <b>X</b>                                                        |     |
| Trolley: gas cylinder .....                     | 752 | X-ray: Digital oral imaging plate with a computer .....         | 630 |
| Trolley: janitor .....                          | 685 | X-Ray viewing box: wall mounted .....                           | 761 |
| Trolley: medical dressing, large .....          | 753 | X-ray: wall-mounted .....                                       | 629 |





National Department of Health  
Private Bag X828  
Pretoria

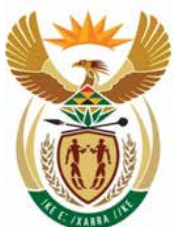

health

Department:  
Health  
**REPUBLIC OF SOUTH AFRICA**

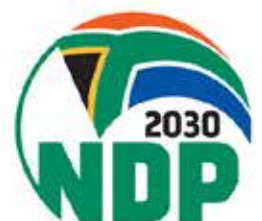
